# Supplementary material for: Validation of proposed prostate cancer biomarkers with gene expression data: a long road to travel
Source: PubMed Central journal article supplement (PMC4113682; doi:10.1007/s10555-013-9470-4), 2014-01-30
Supplement: 10555_2013_9470_MOESM1_ESM.pdf [file 10555_2013_9470_MOESM1_ESM.pdf]

# Survival by A2M expression

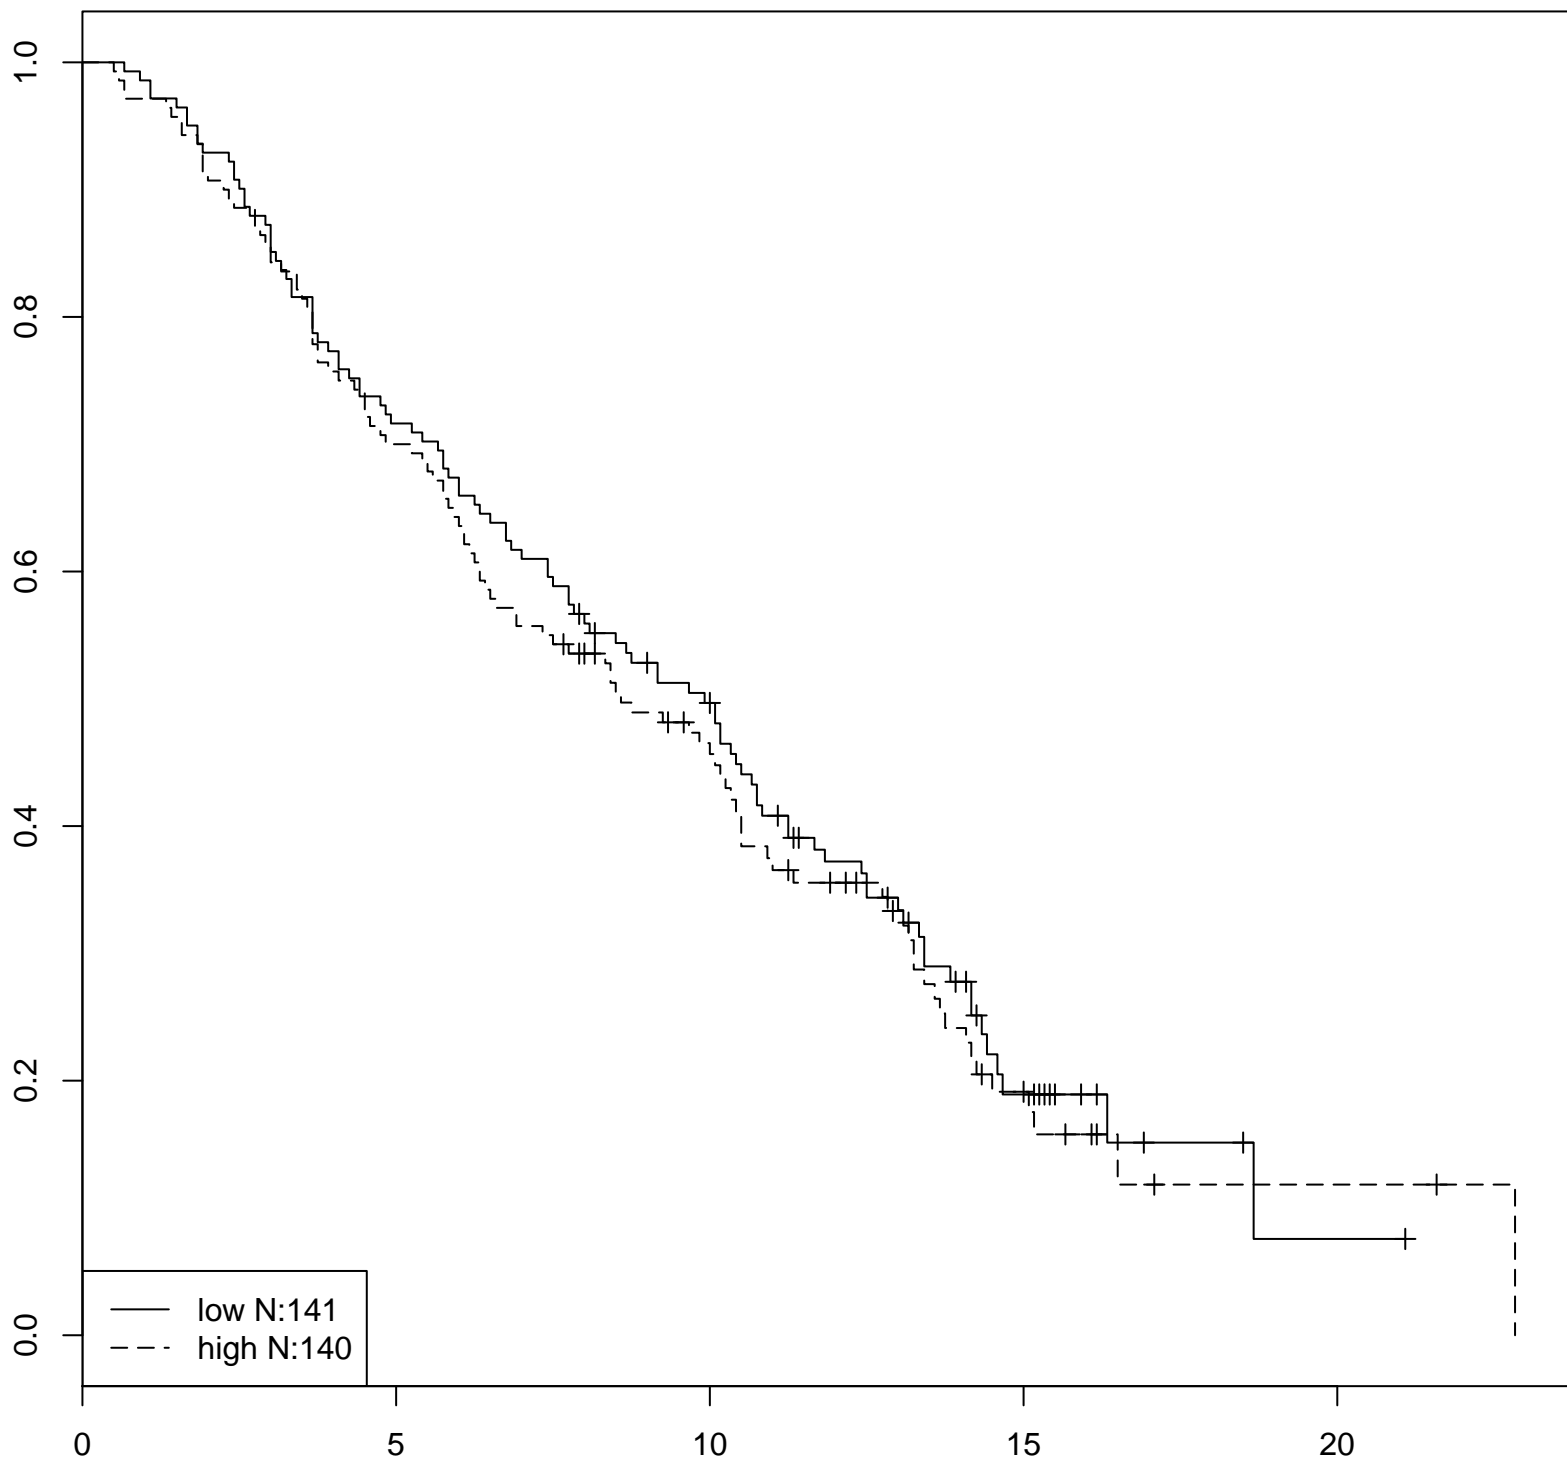

# Survival by ABCA5 expression

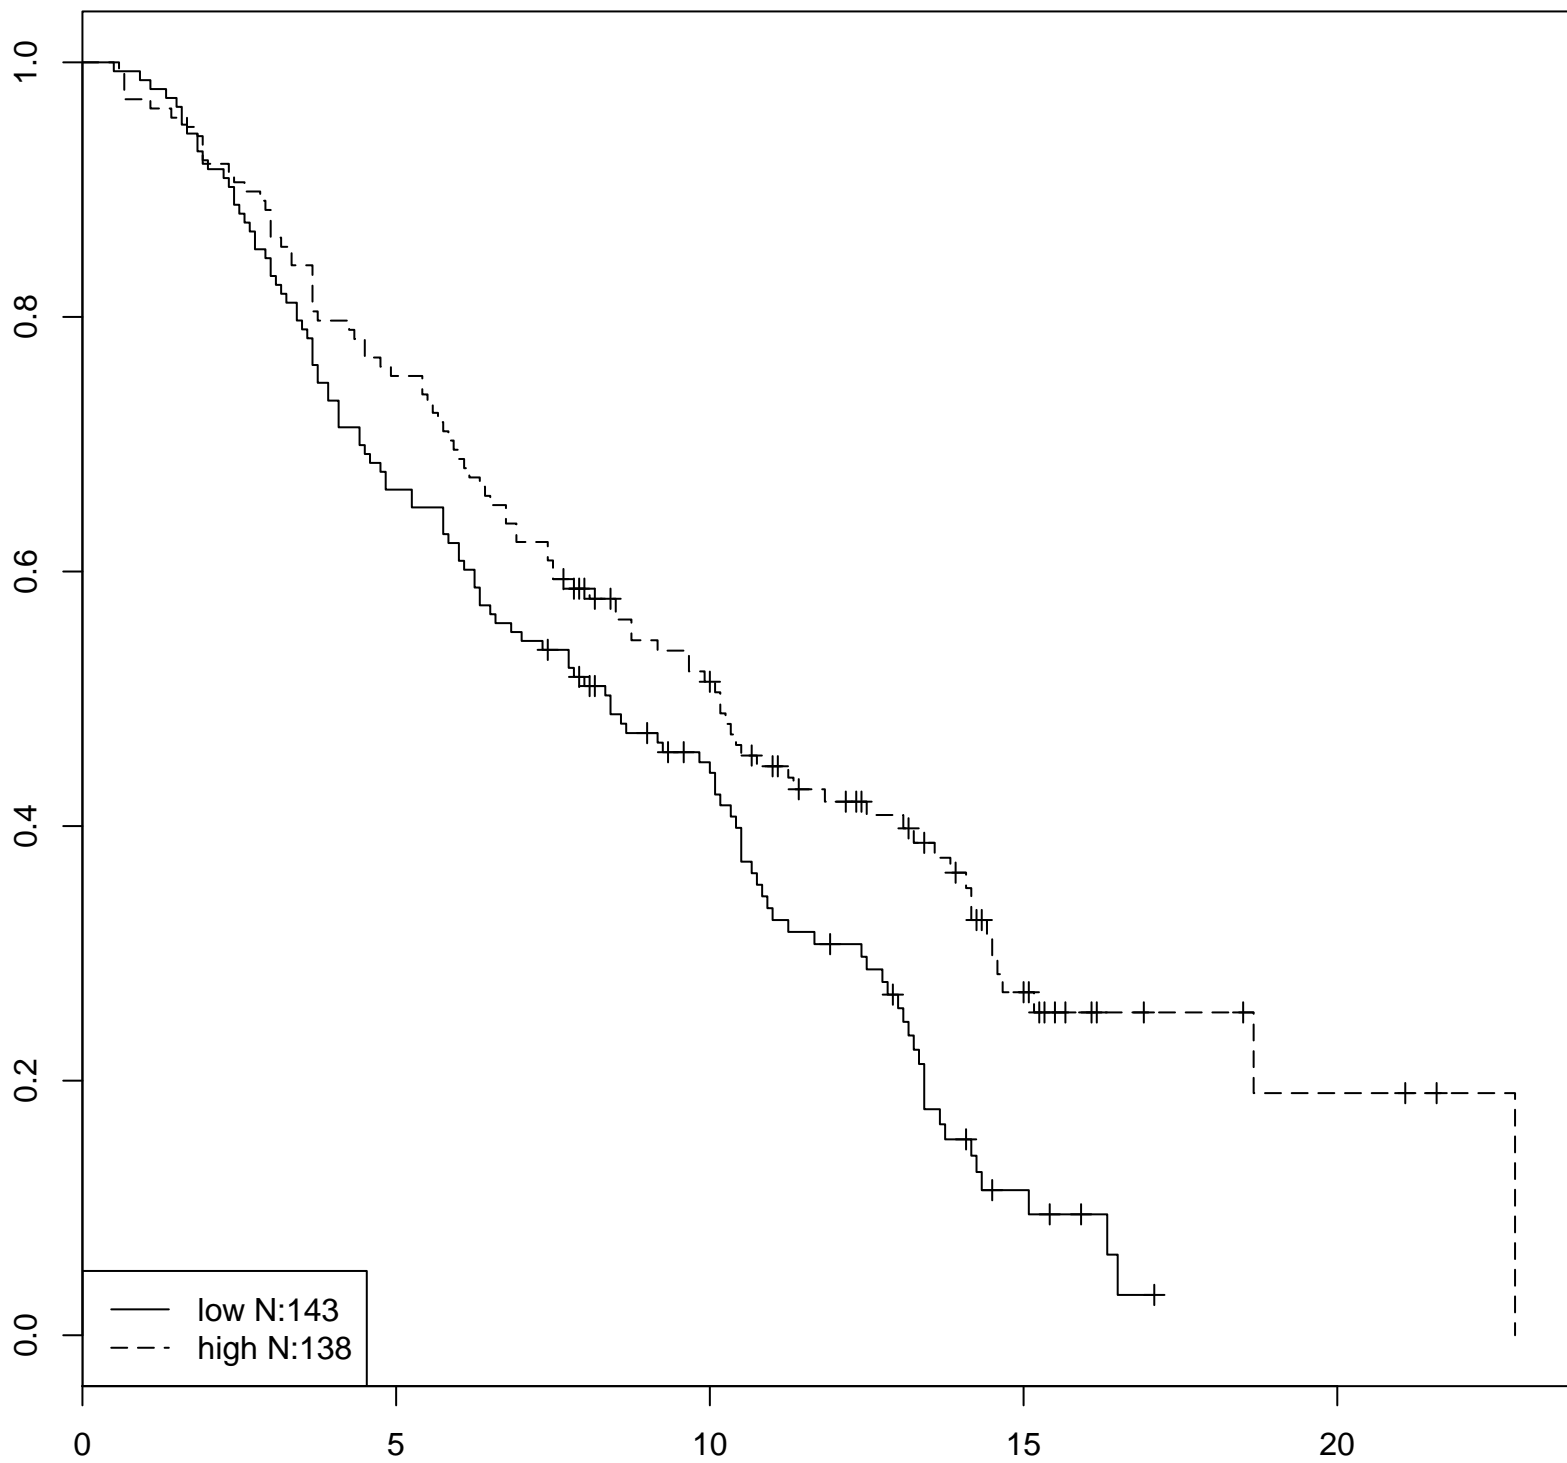

years

log-rank test p-value = 0.003

# Survival by ABCC4 expression

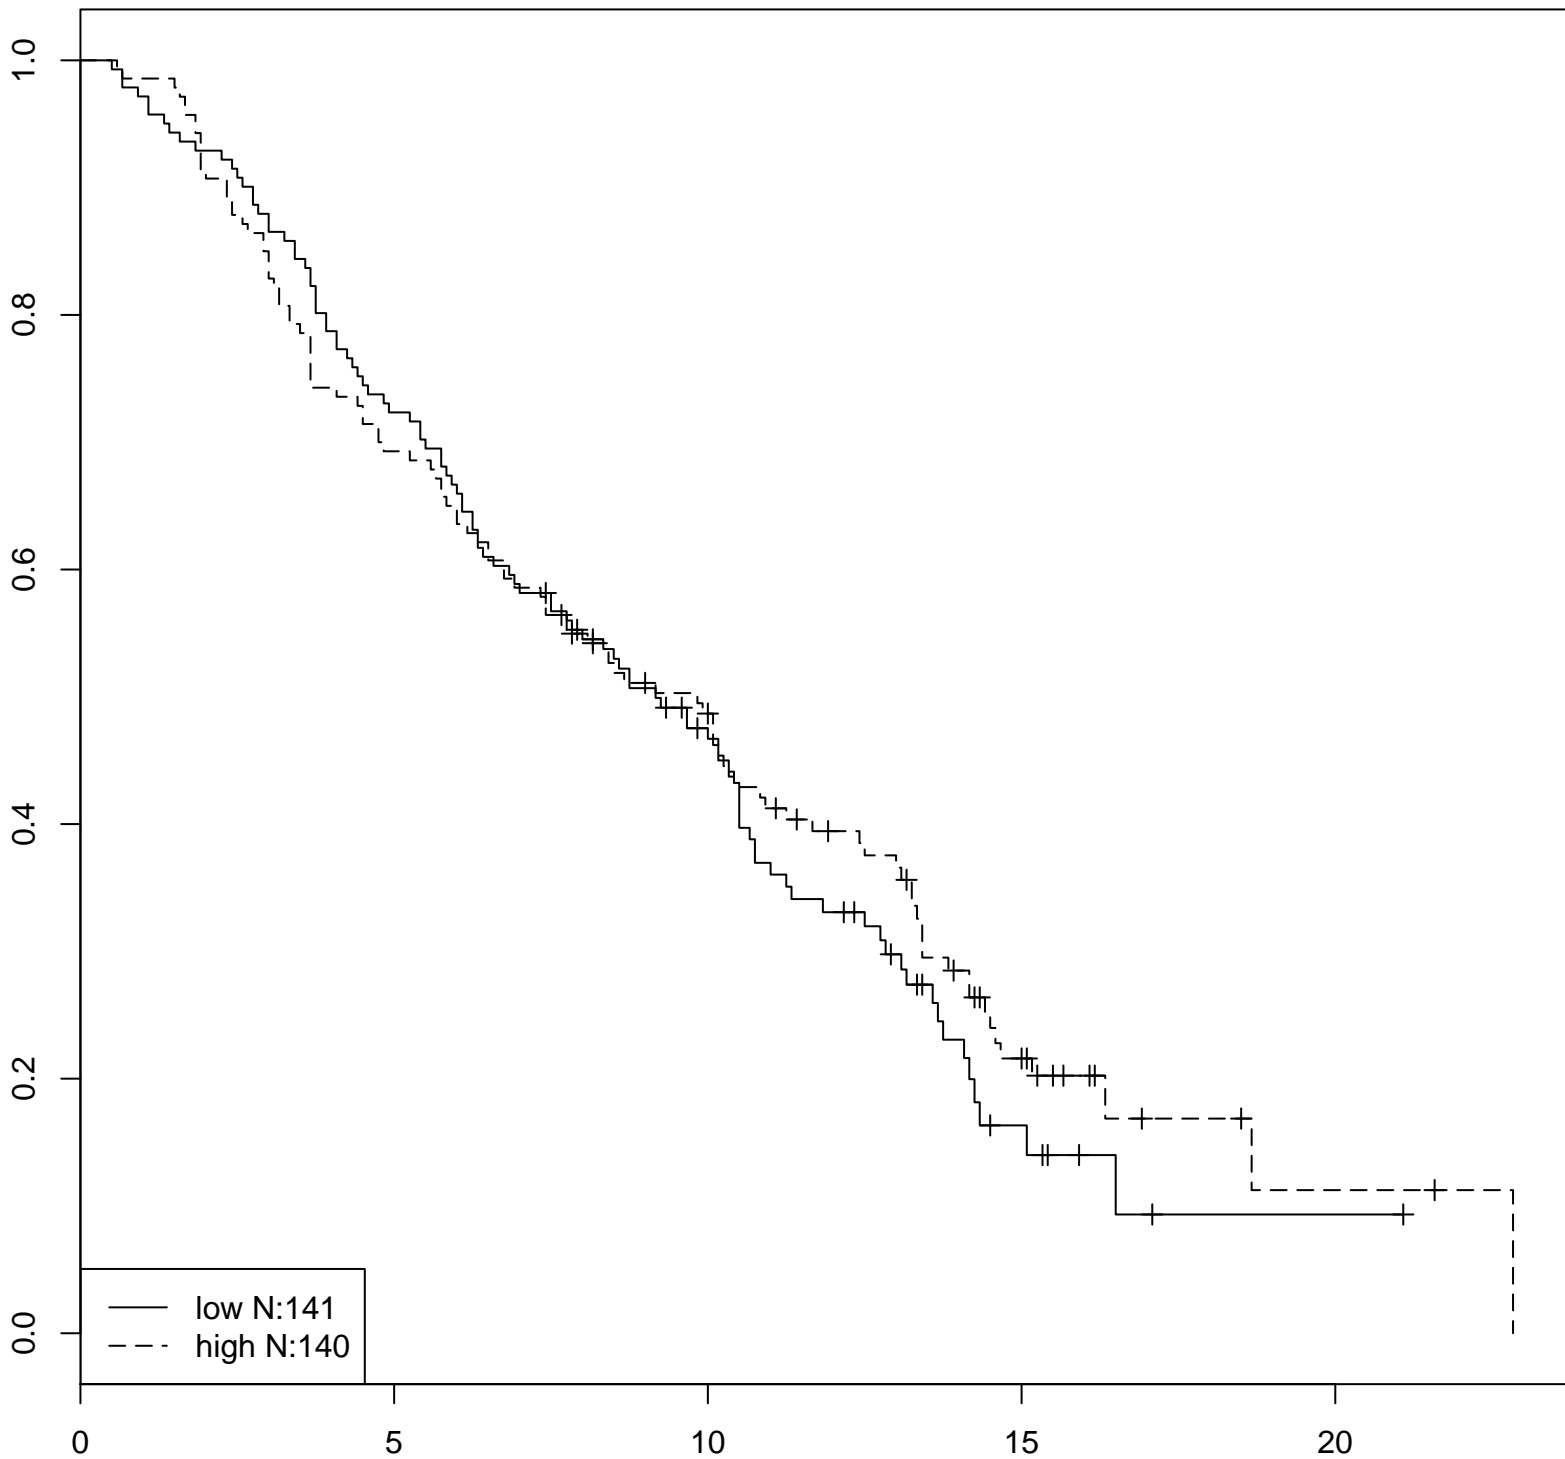

years

log-rank test p-value = 0.461

# Survival by ACP5 expression

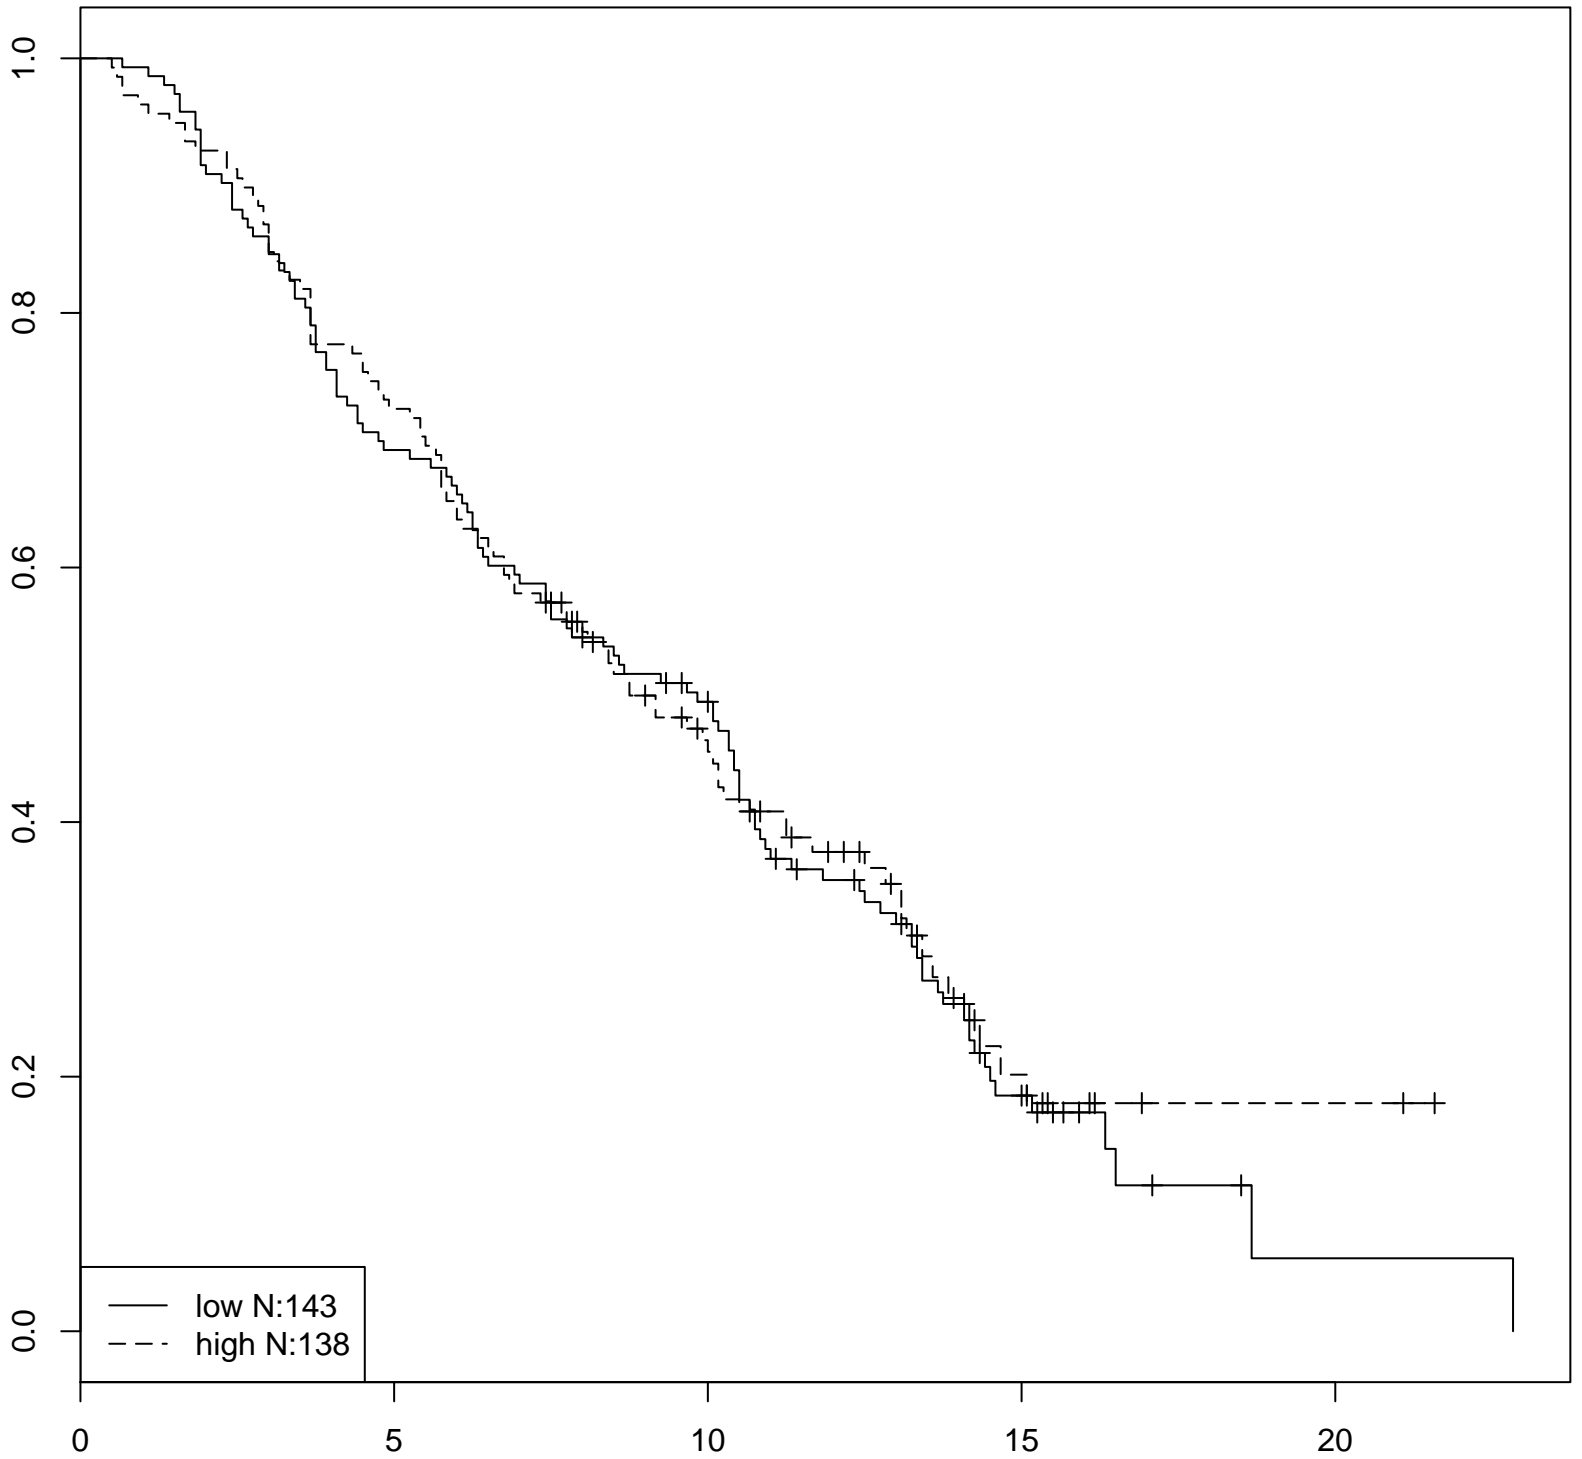

years

log-rank test p-value = 0.782

# Survival by ADAM8 expression

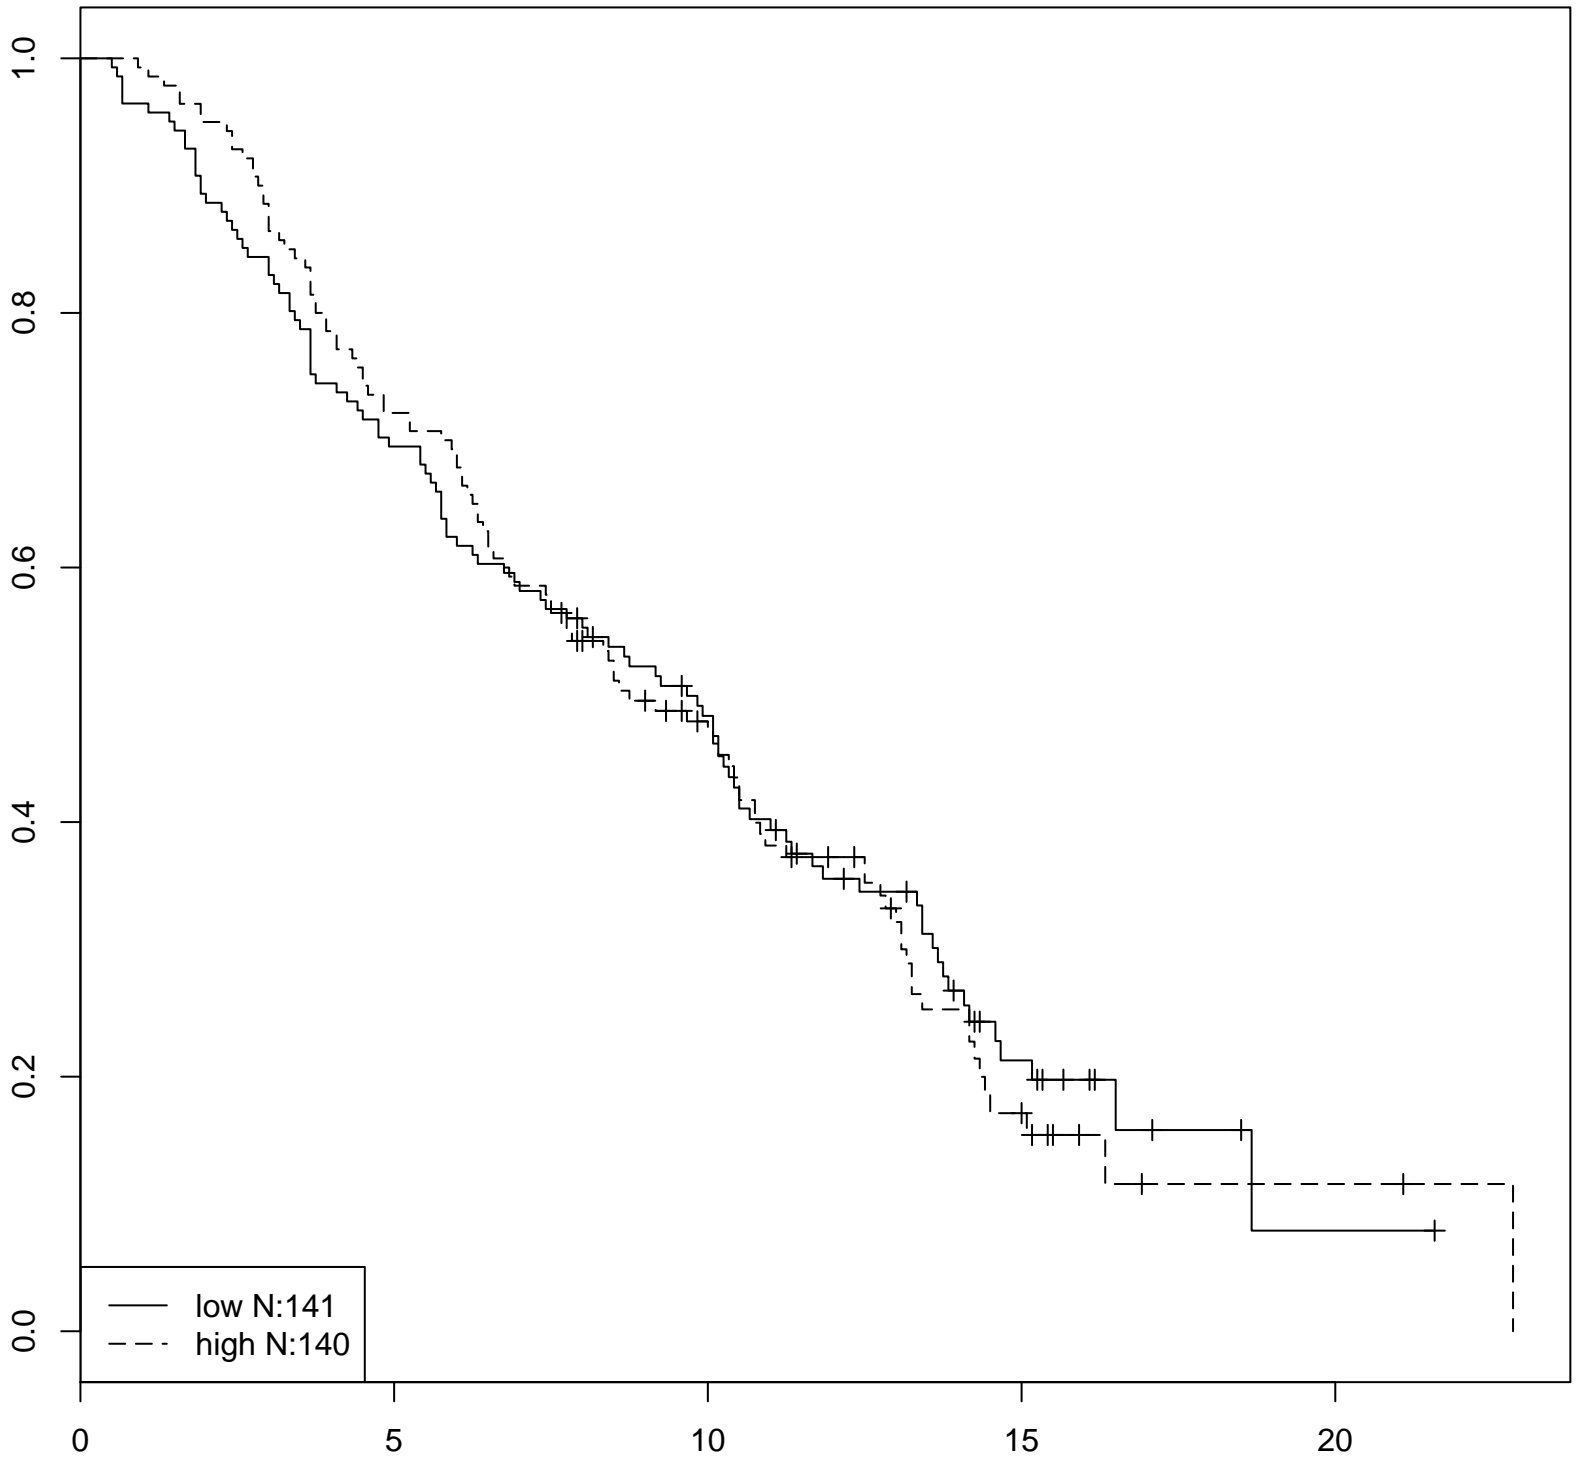

years

log-rank test p-value = 0.839

# Survival by ADAM9 expression

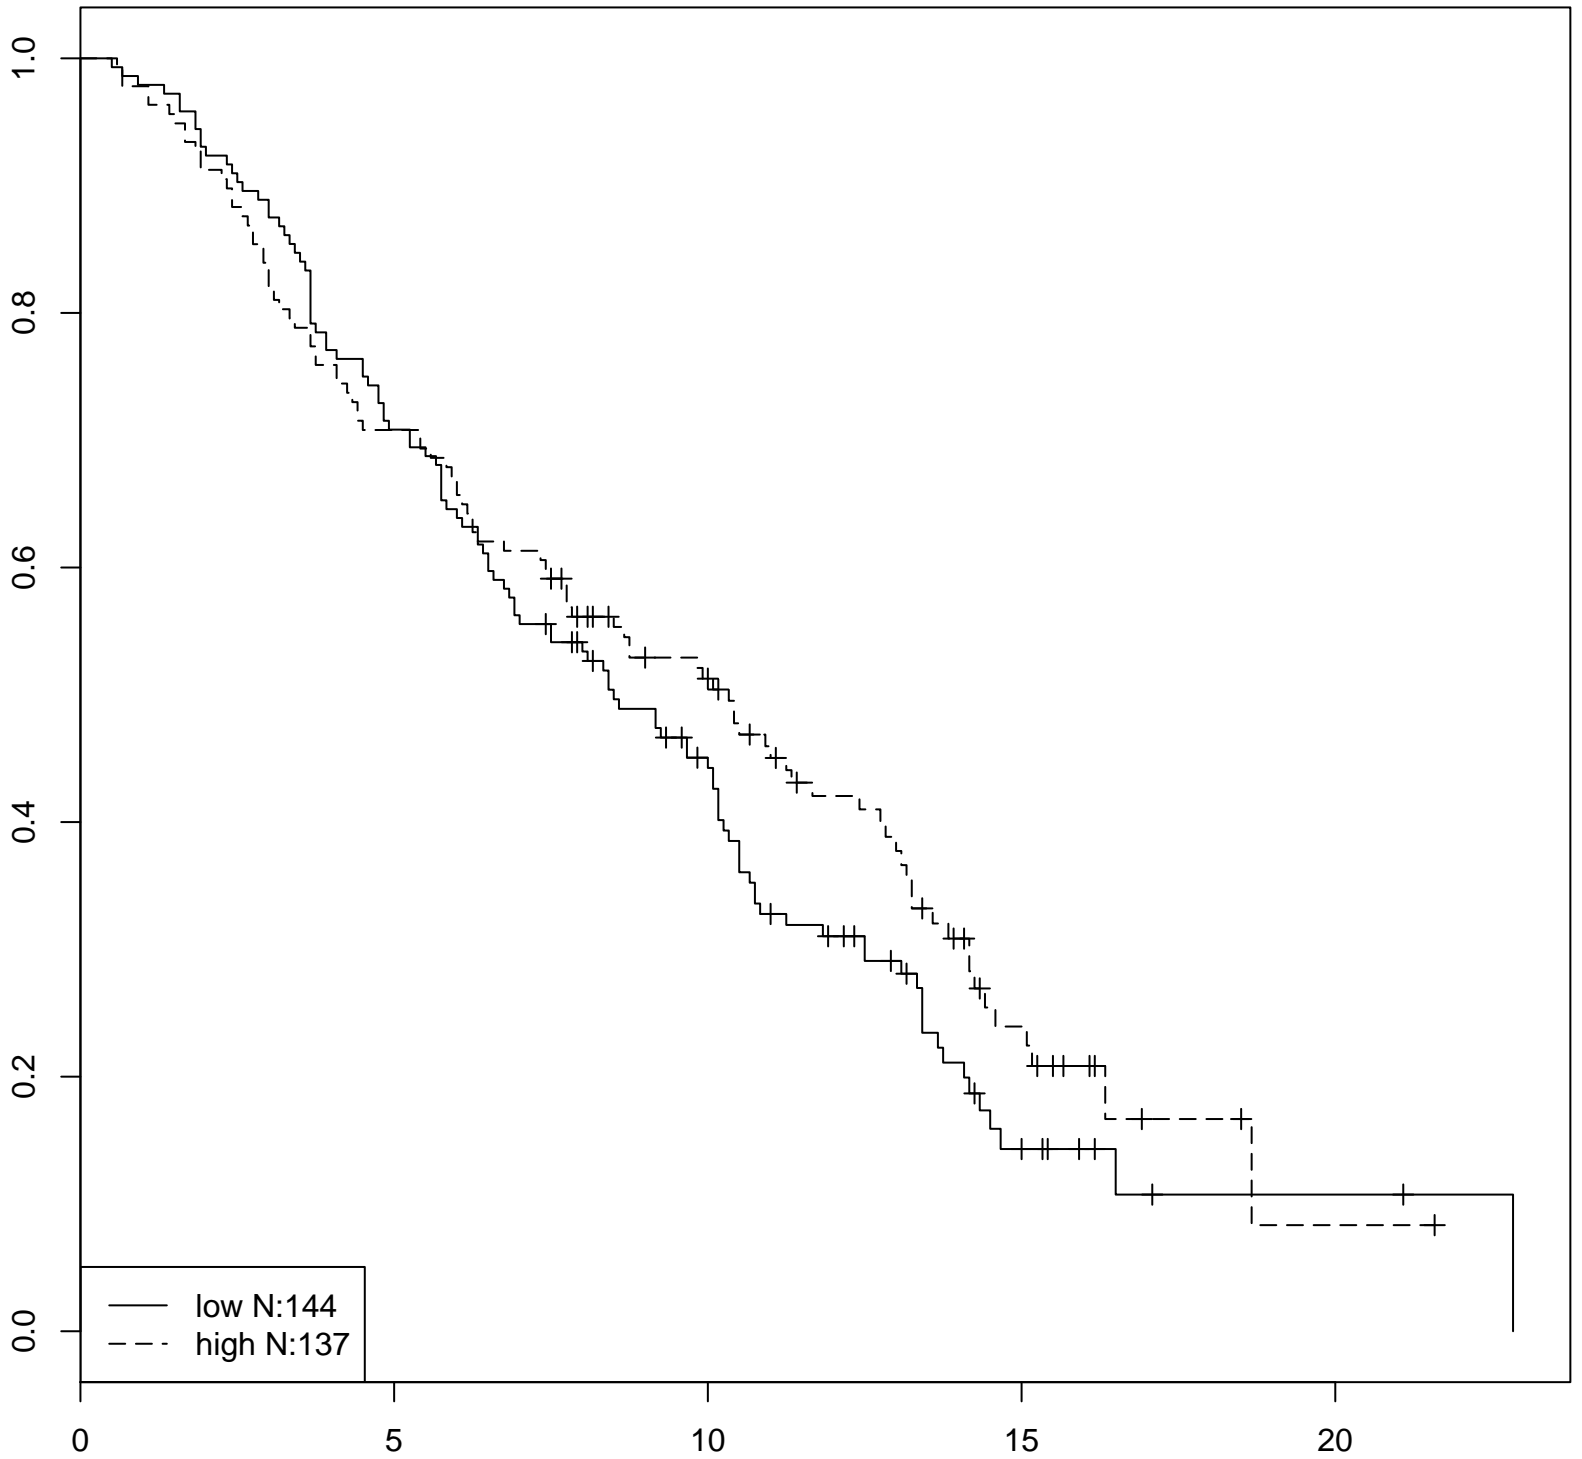

years

log-rank test p-value = 0.19

# Survival by AKAP12 expression

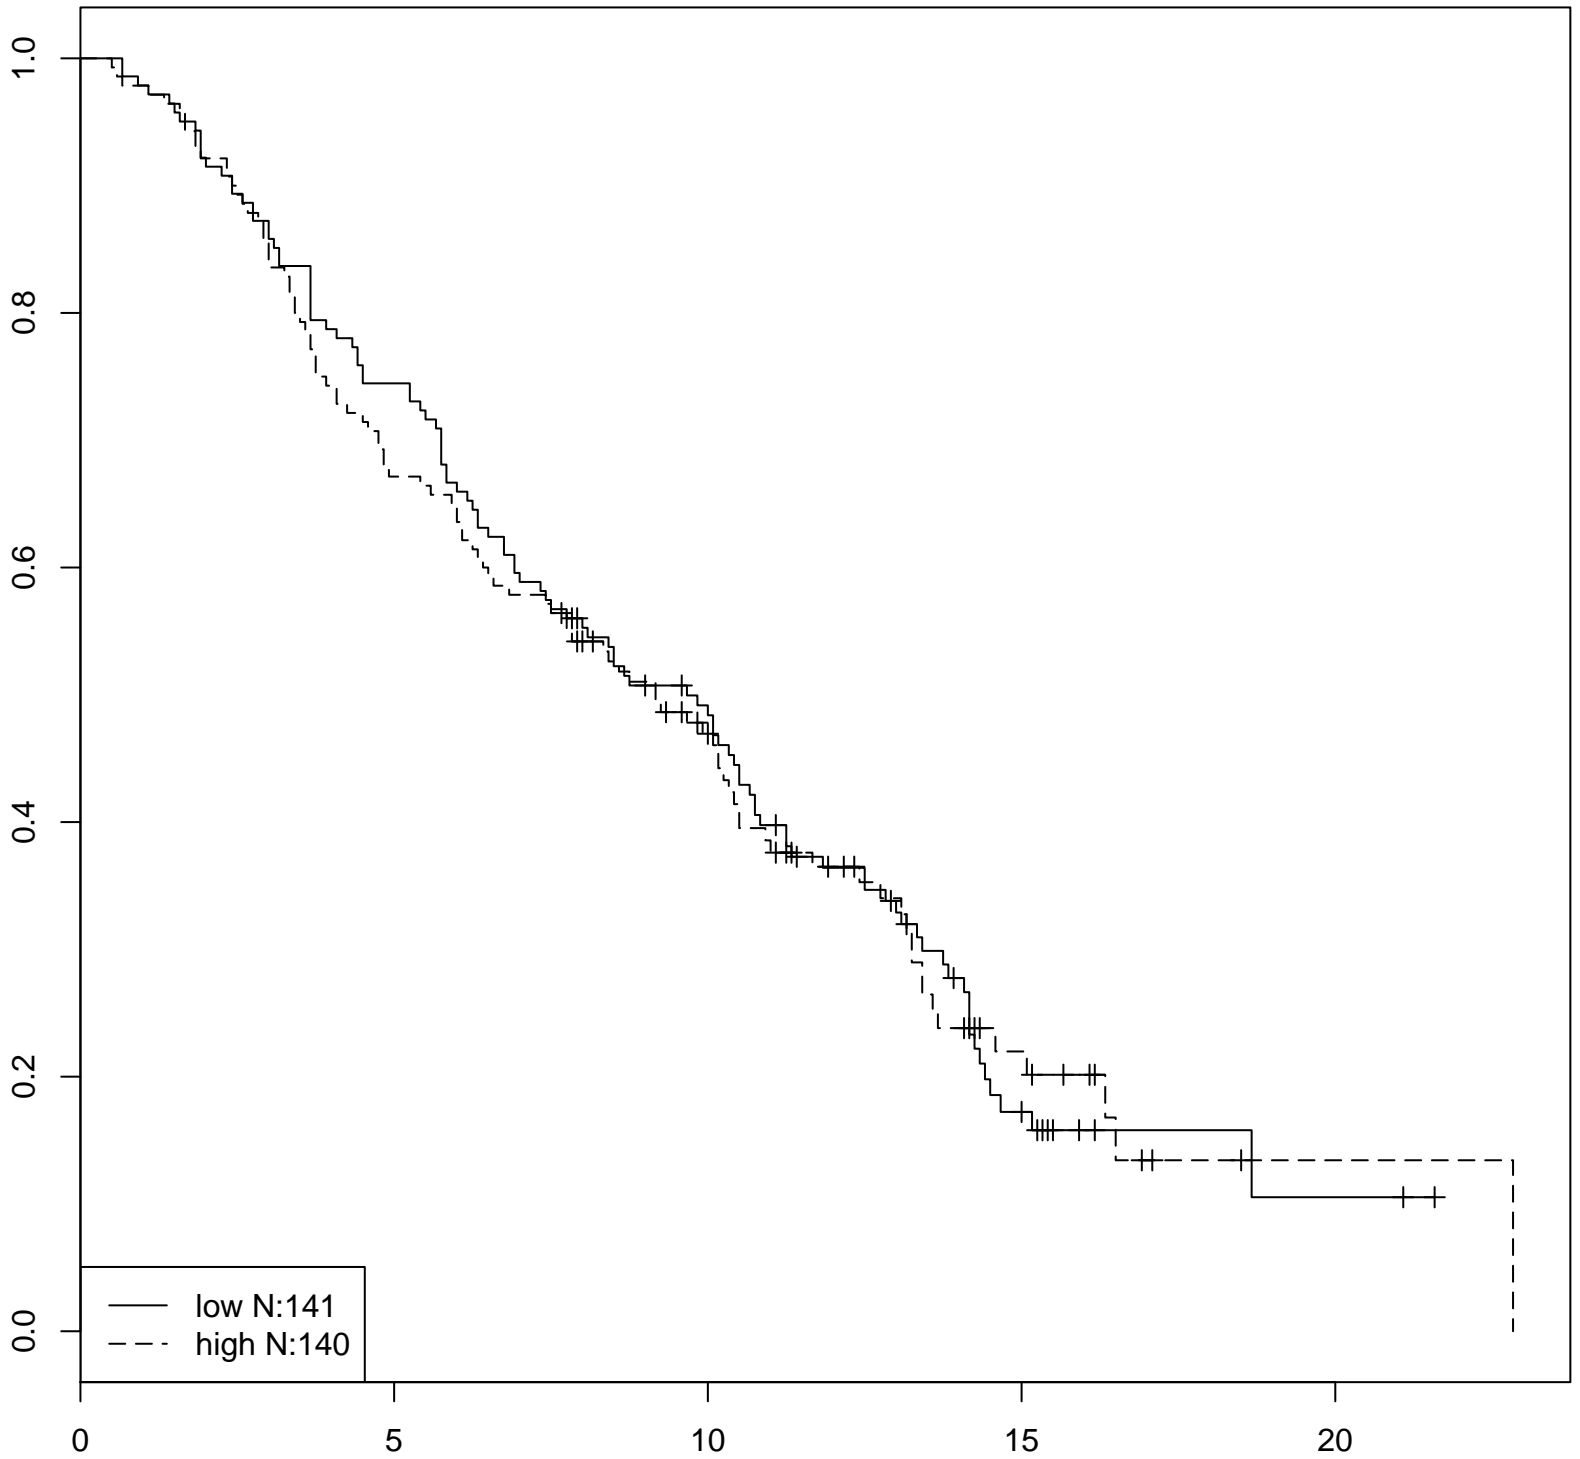

years  
log-rank test p-value = 0.908

# Survival by ALCAM expression

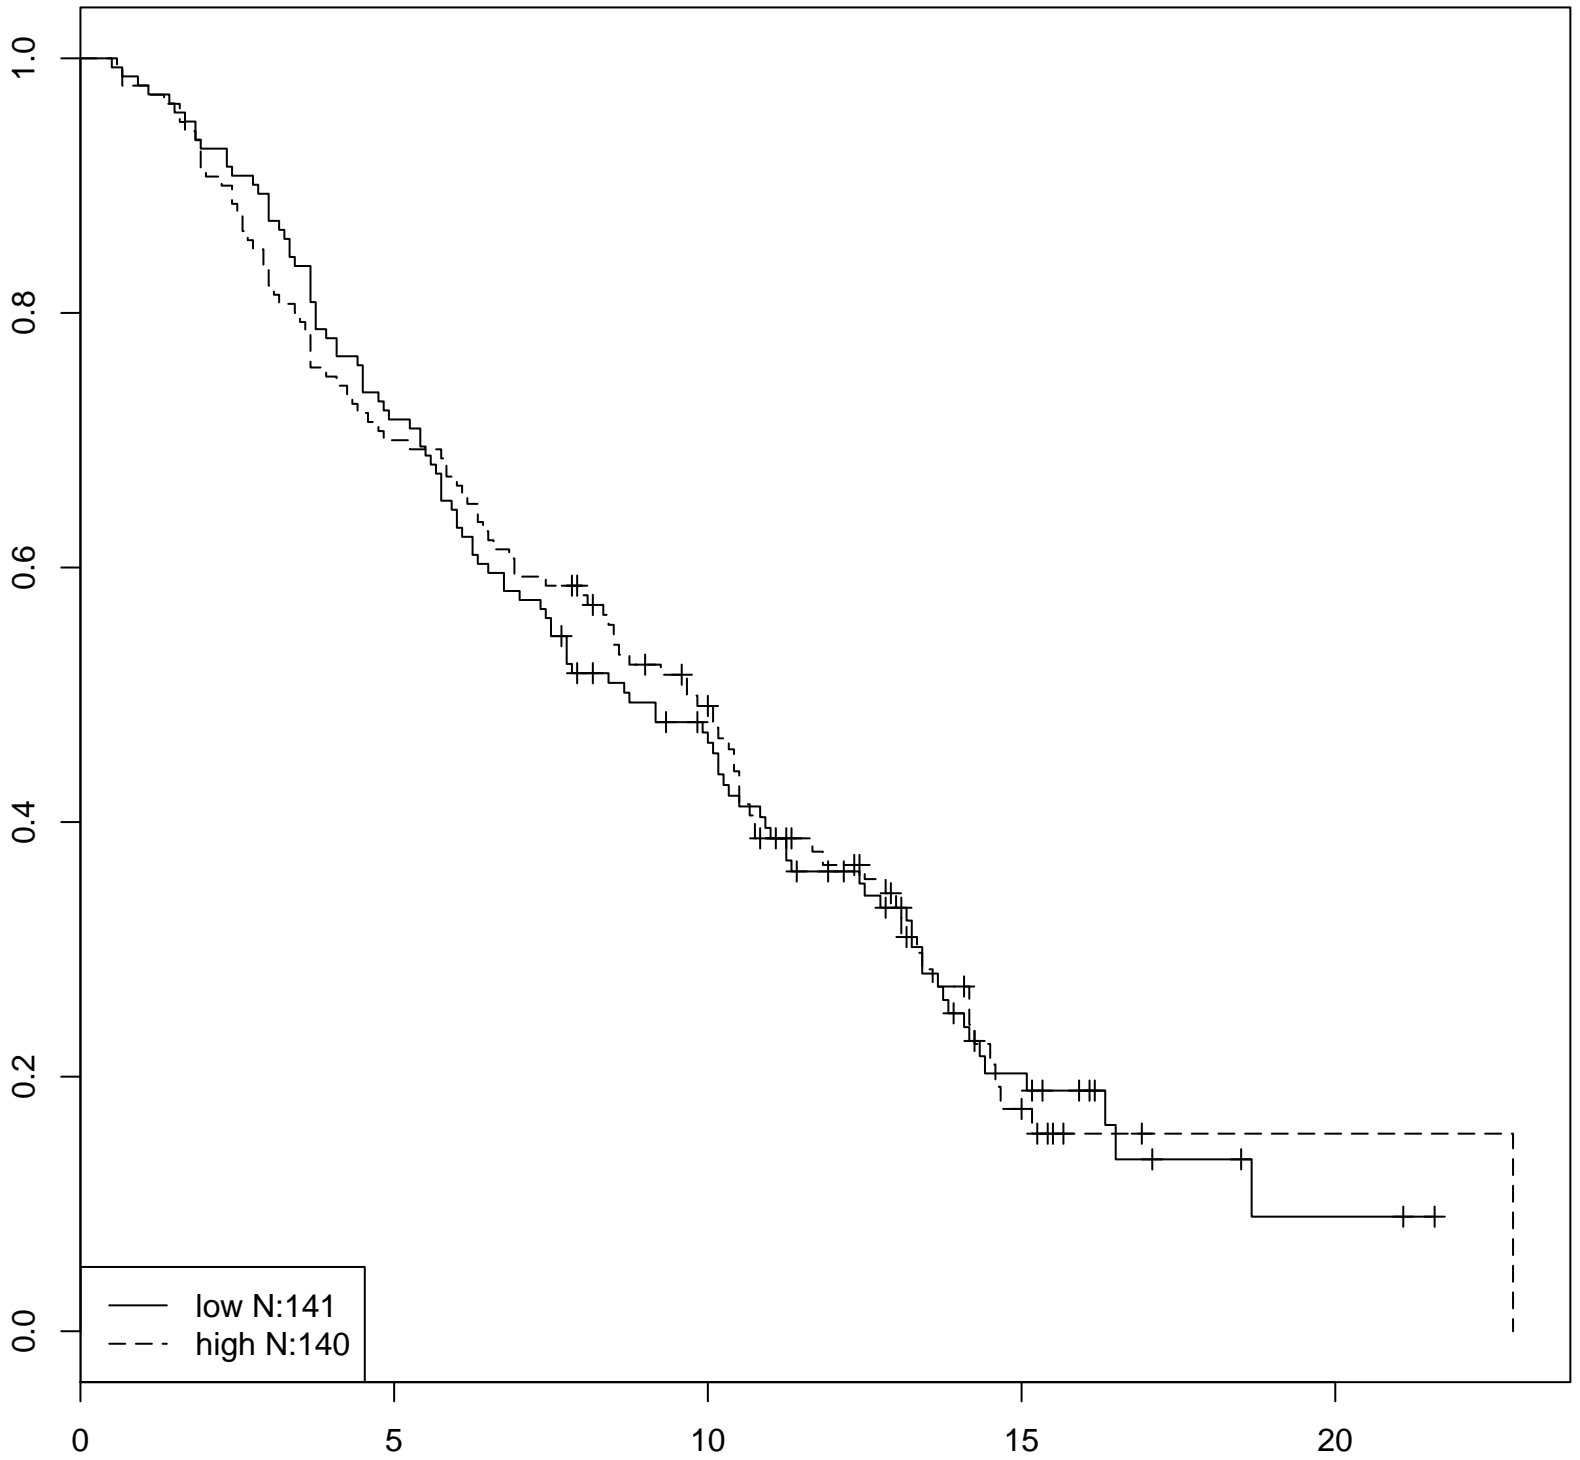

years

log-rank test p-value = 0.927



# Survival by ALDH1A1 expression

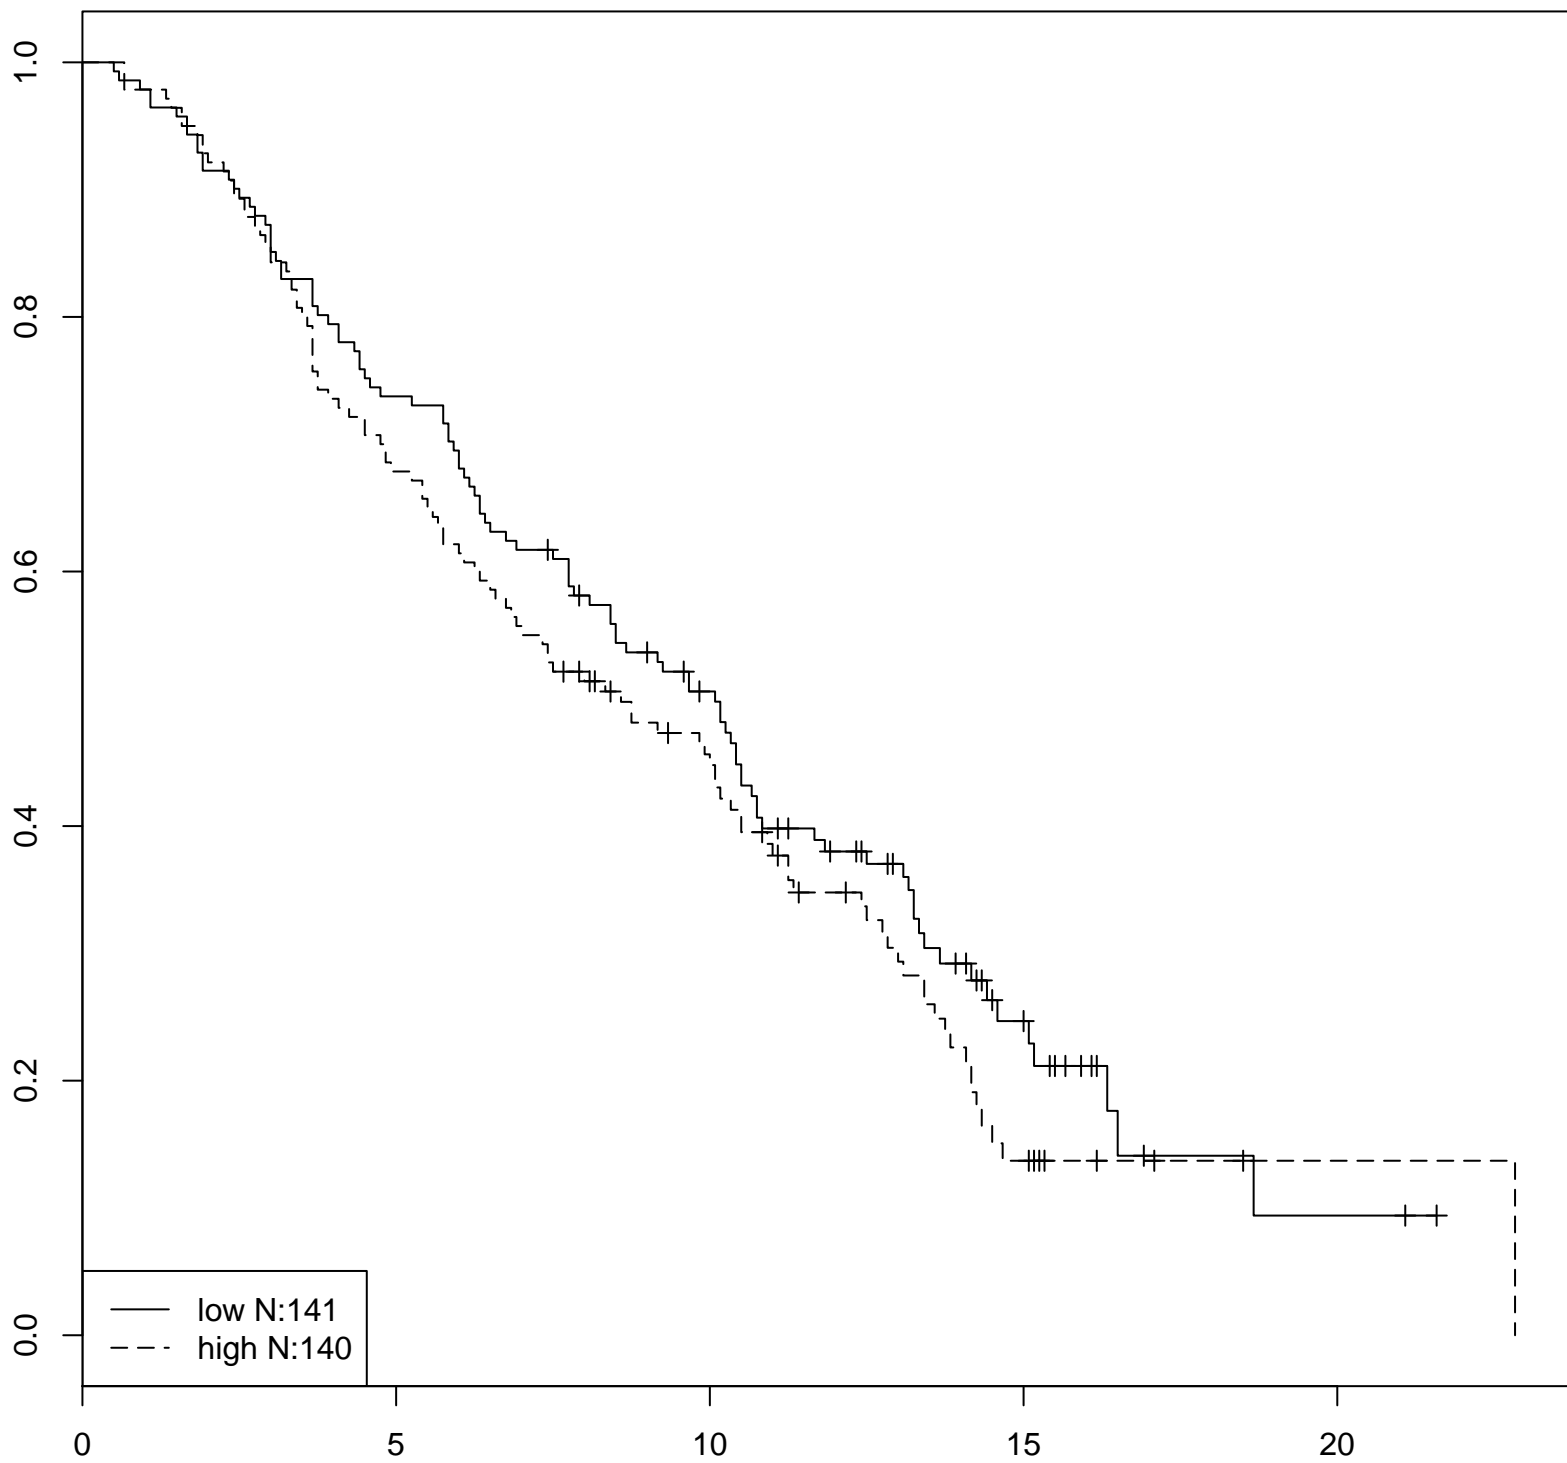

years

log-rank test p-value = 0.22

# Survival by ALOX15 expression

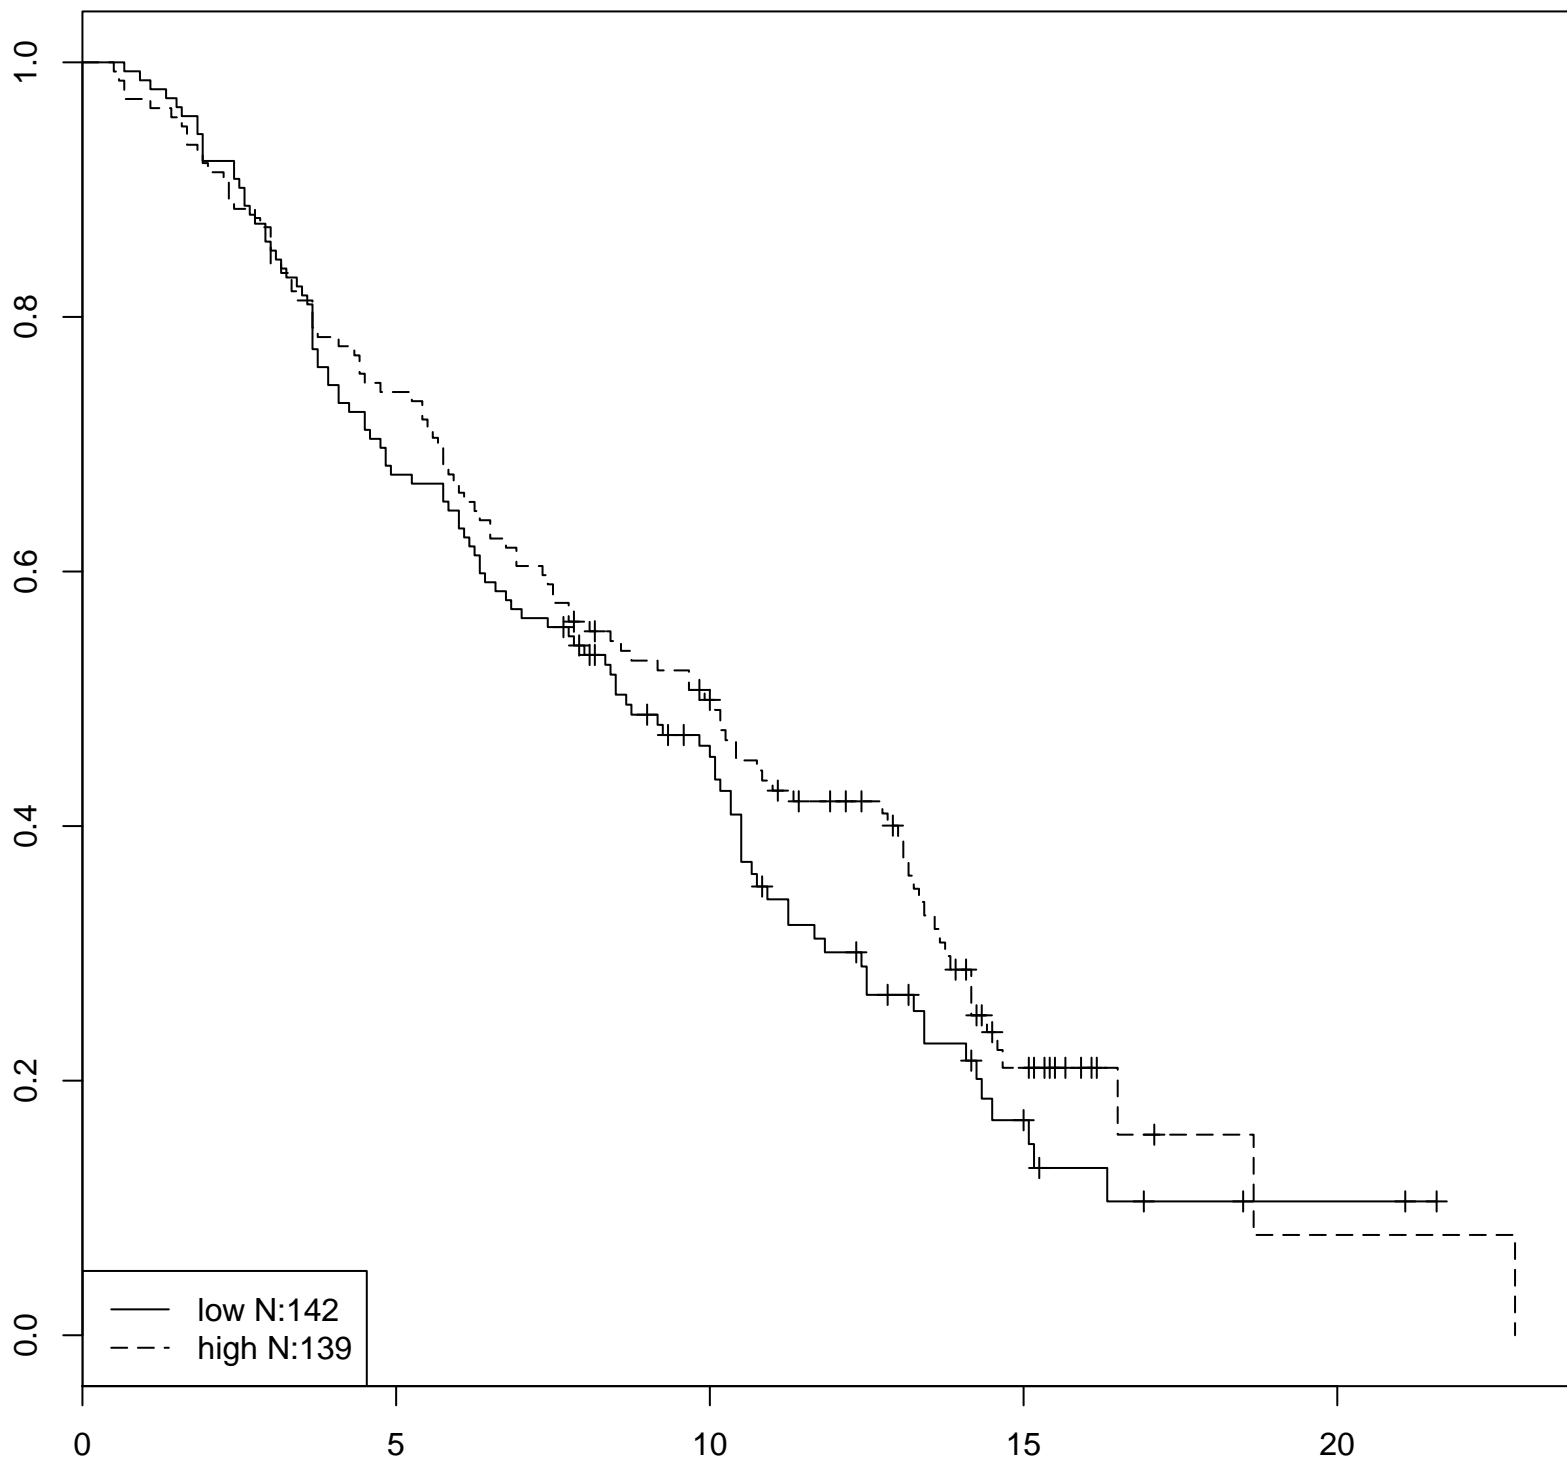

years

log-rank test p-value = 0.204

# Survival by AMACR expression

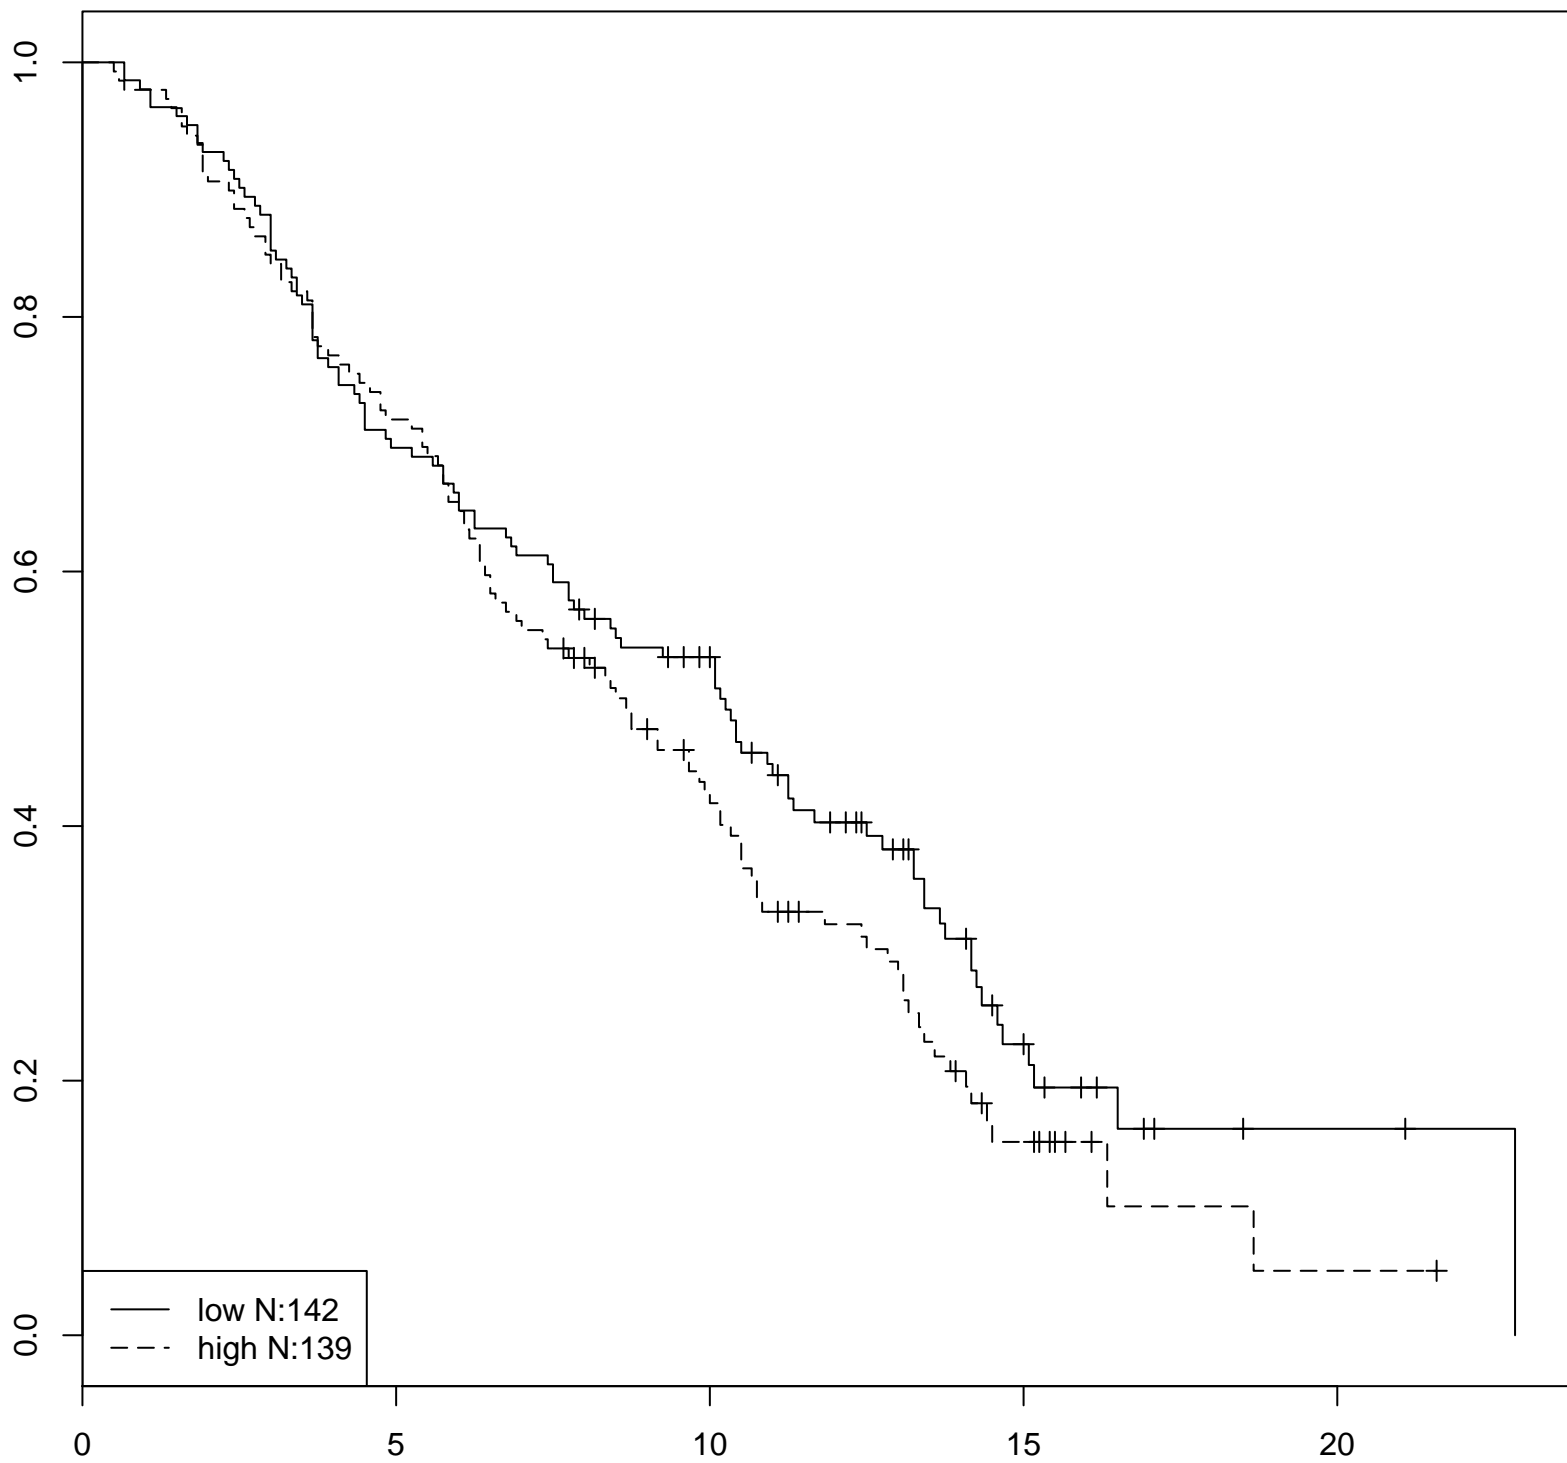

# Survival by ANGPT2 expression

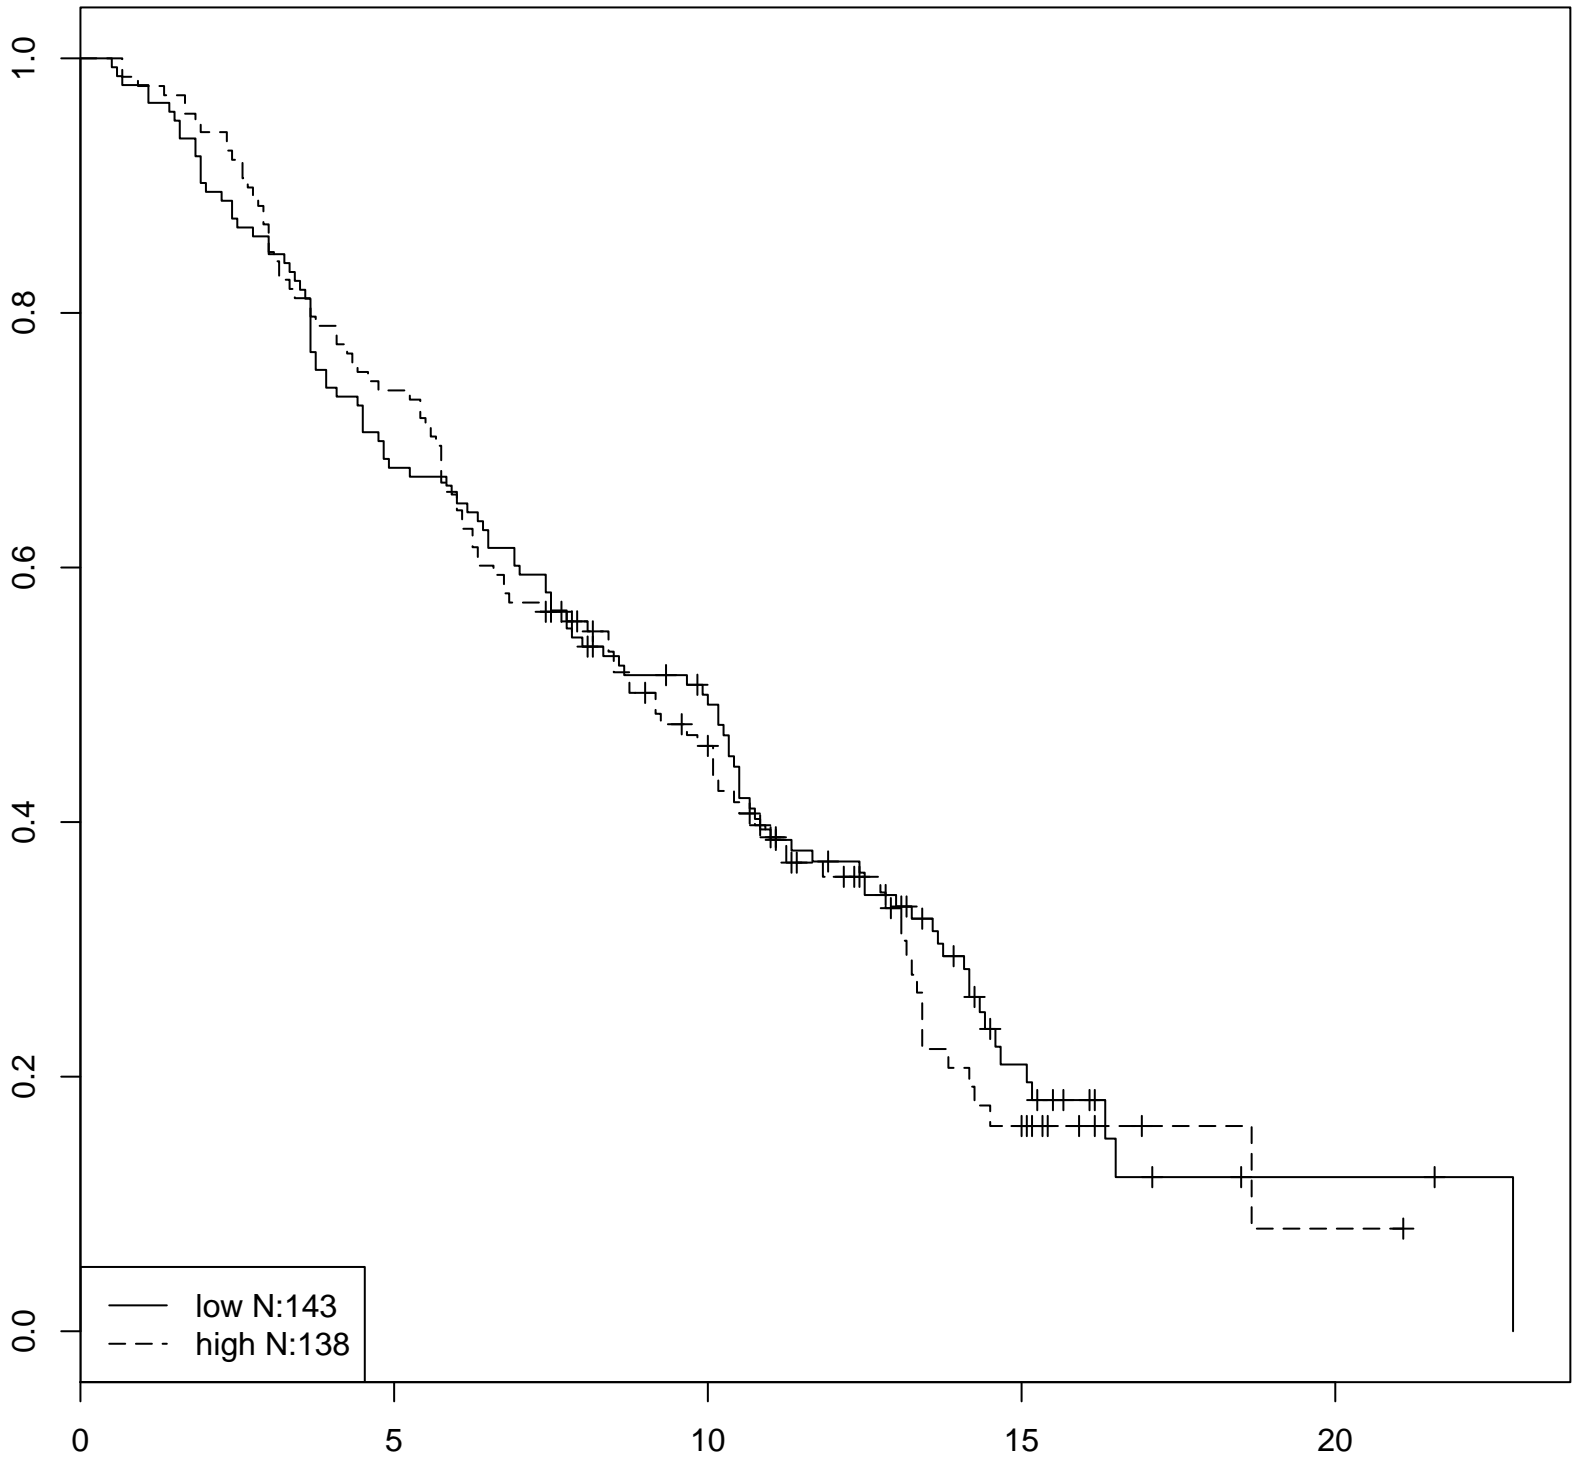

years

log-rank test p-value = 0.655

# Survival by ANXA1 expression

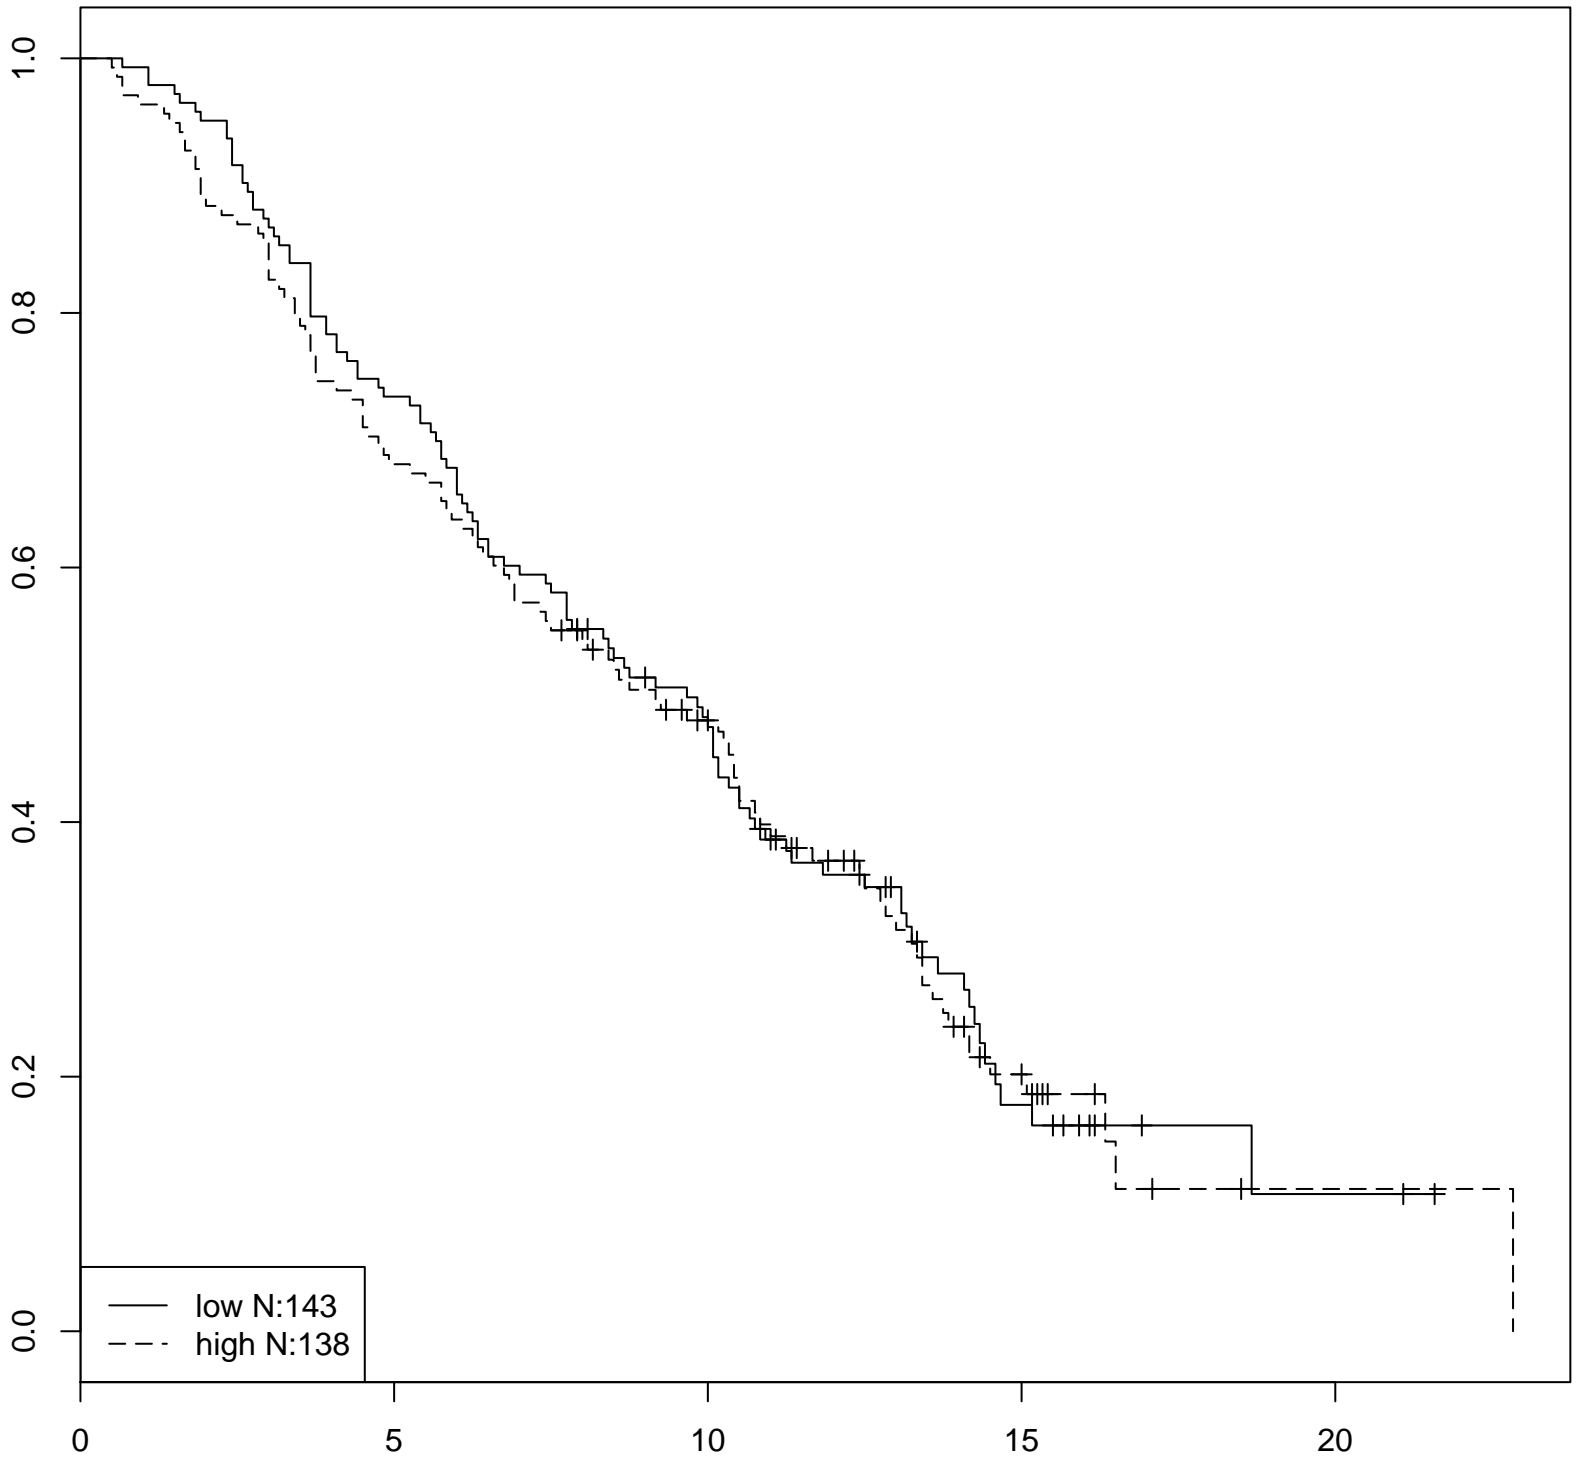

years

log-rank test p-value = 0.797

# Survival by ANXA2 expression

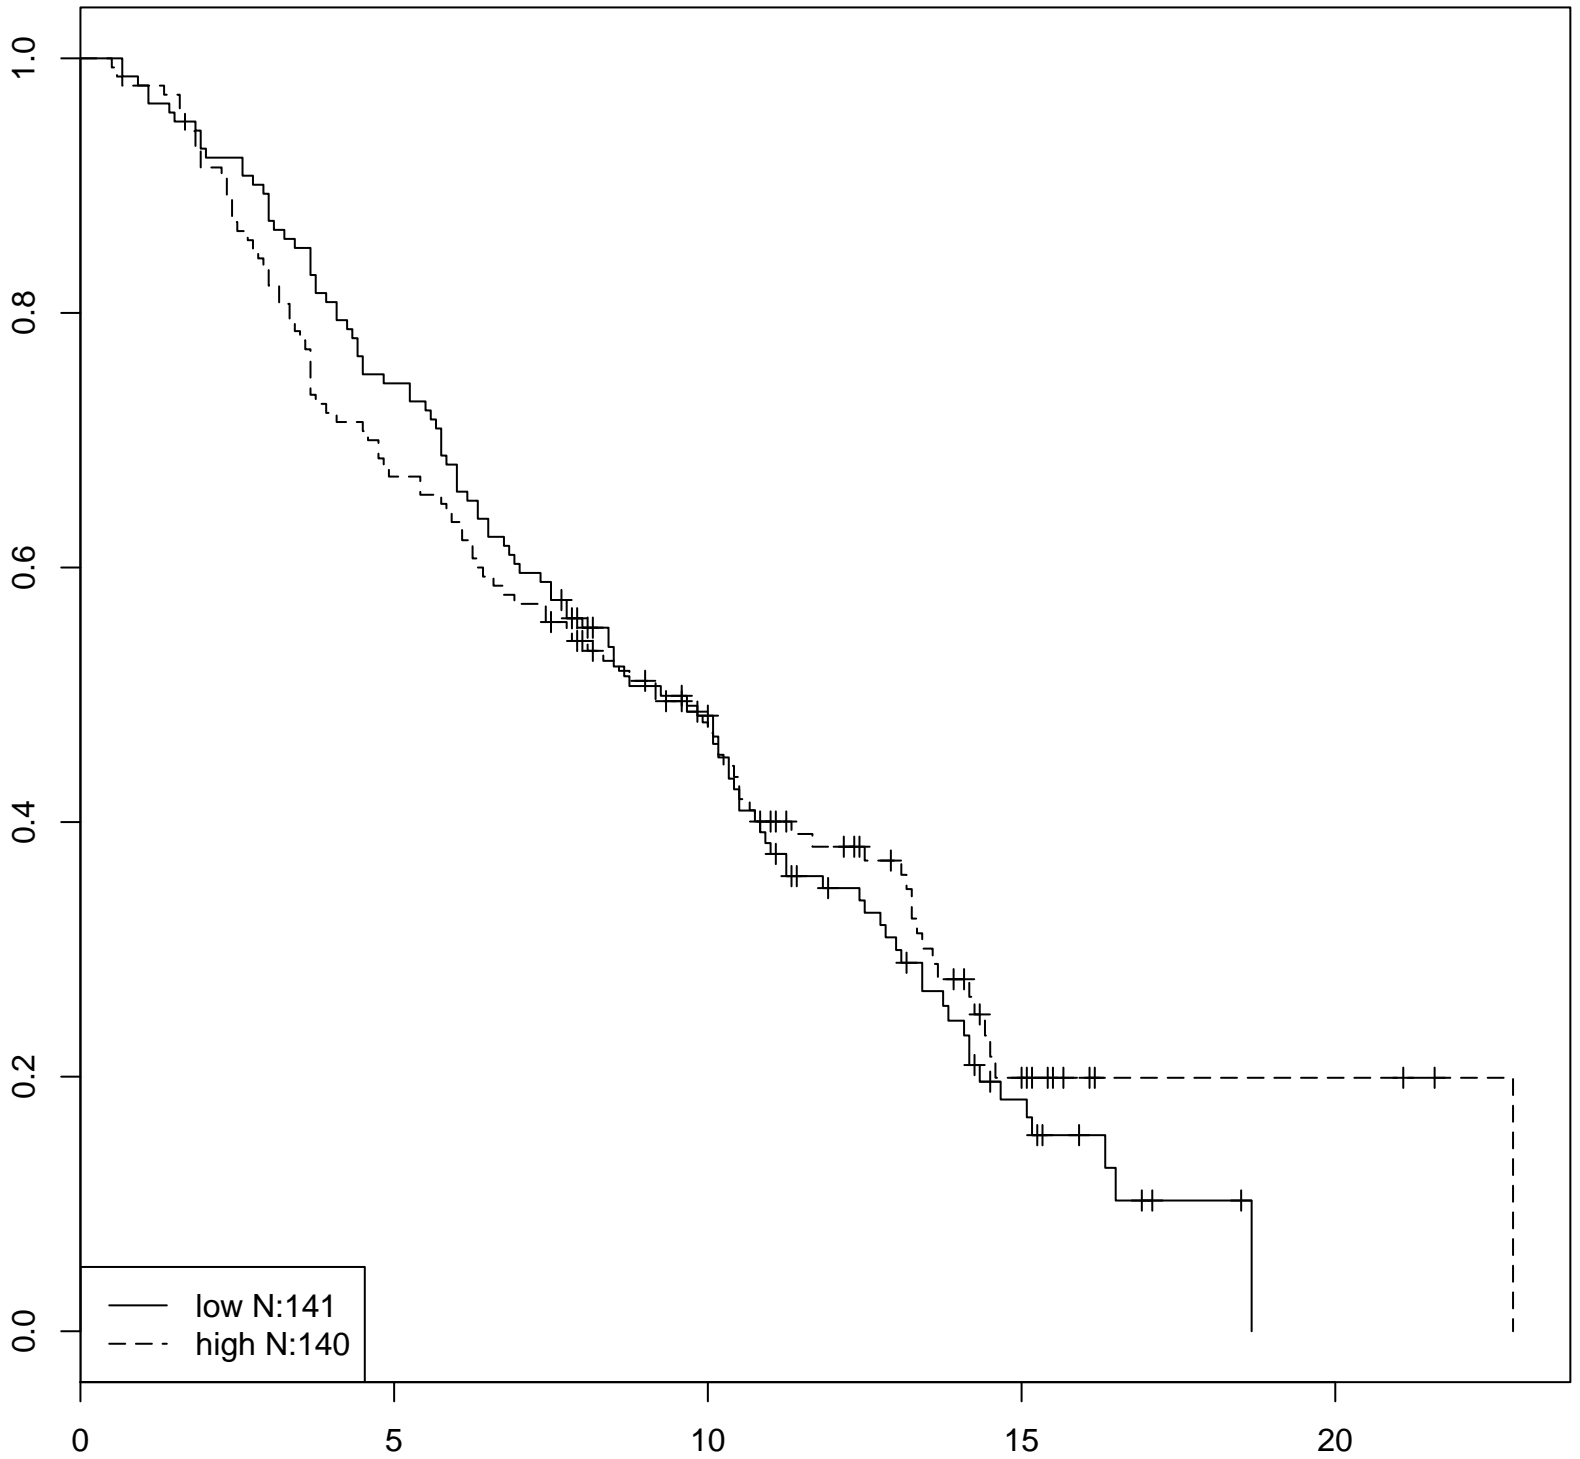

years  
log-rank test p-value = 0.667

# Survival by ANXA3 expression

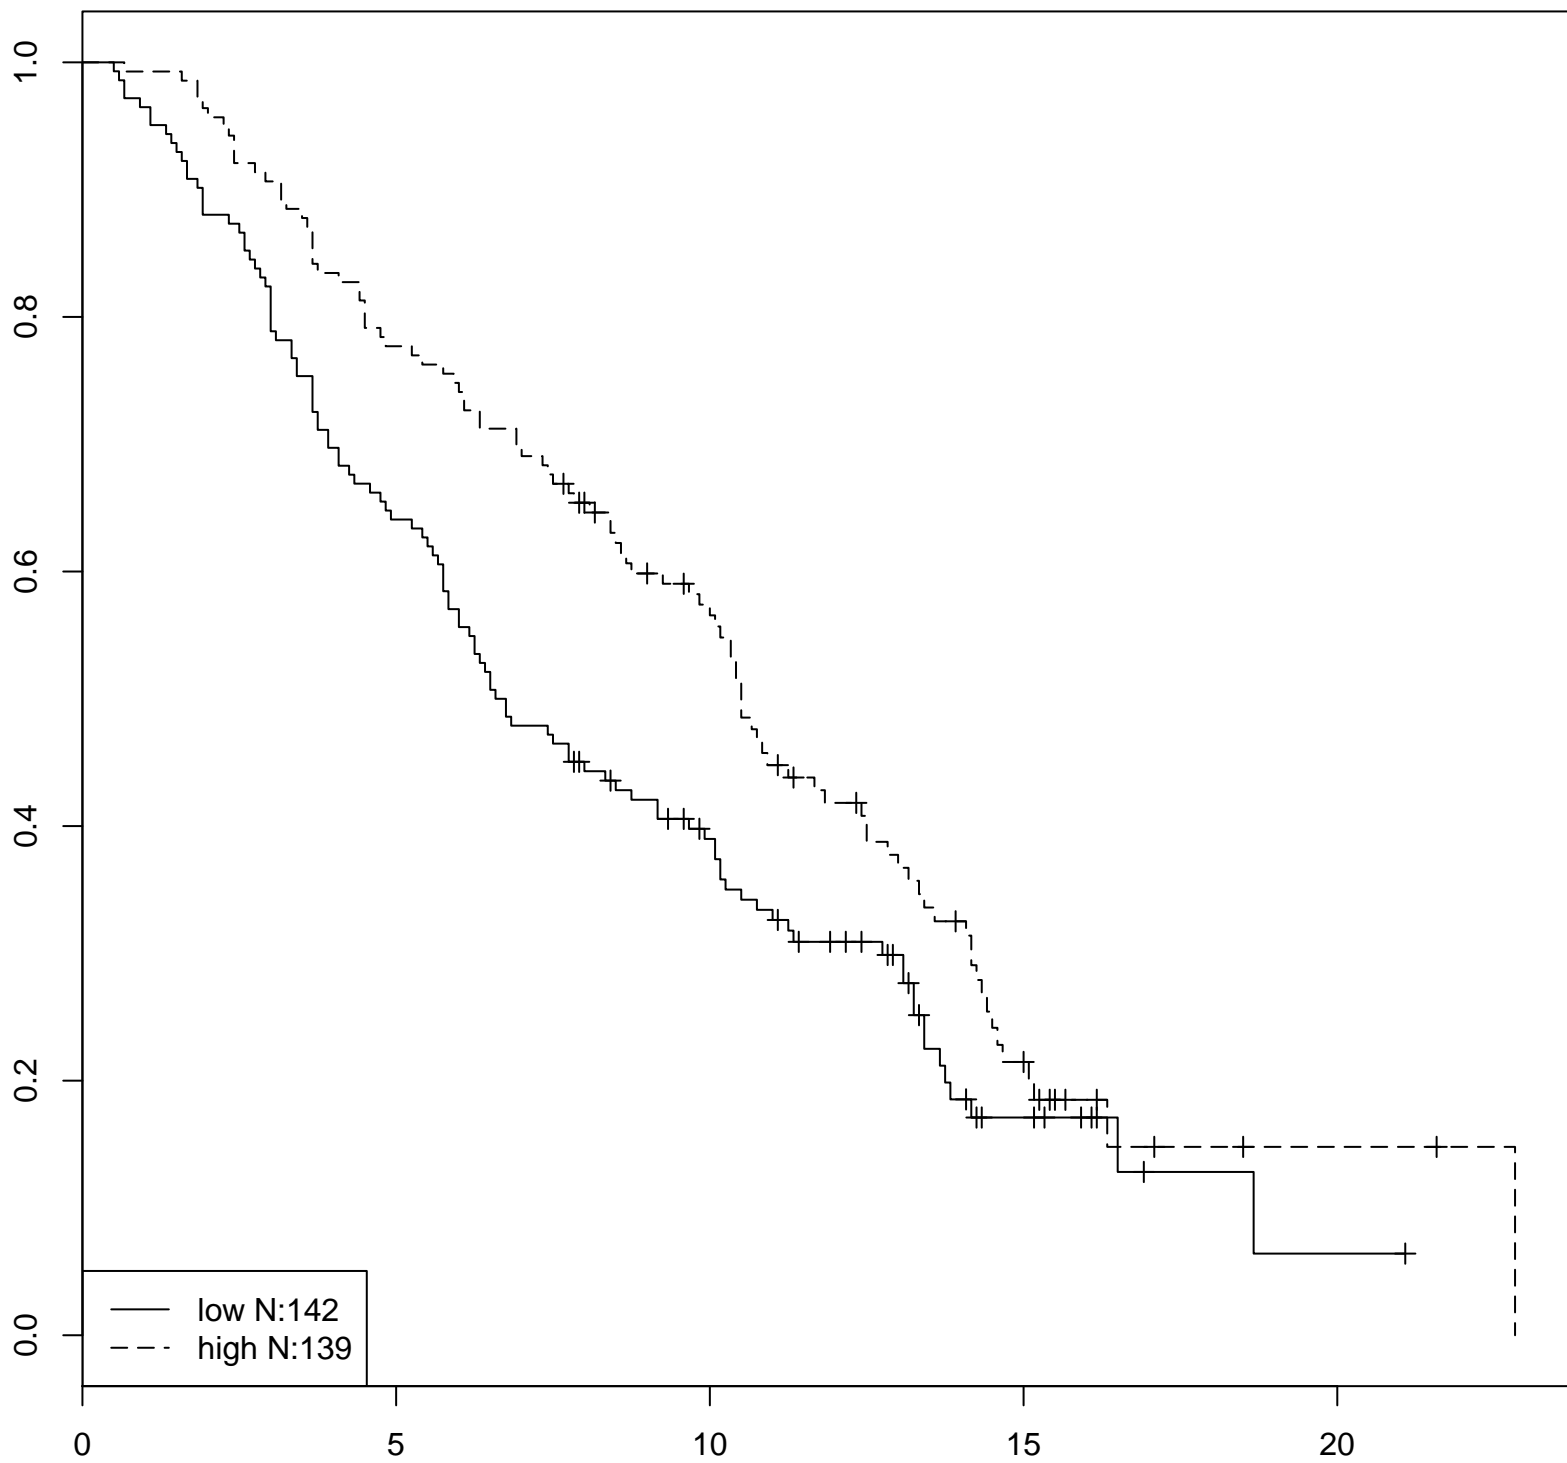

years

log-rank test p-value = 0.009

# Survival by ANXA7 expression

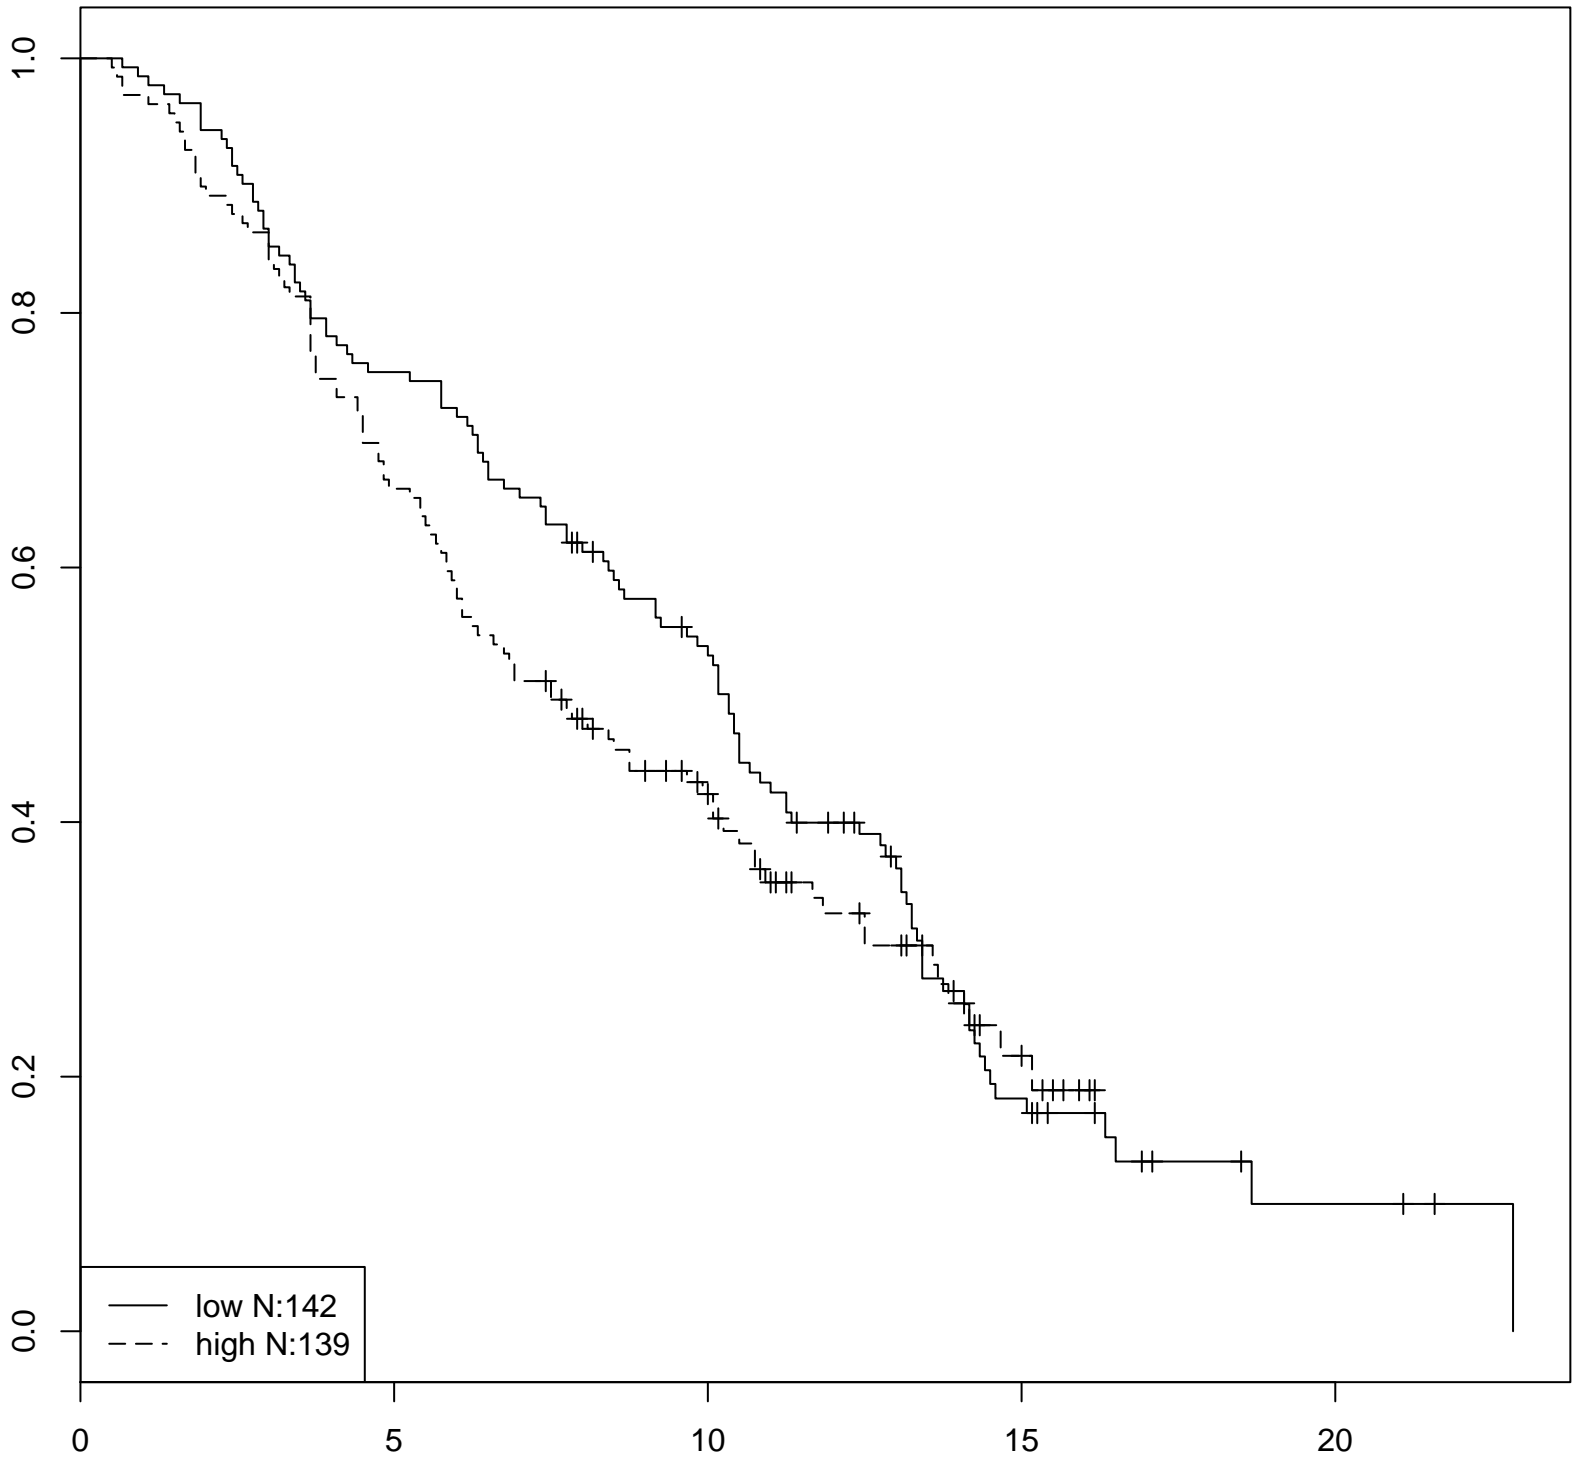



# Survival by APC expression

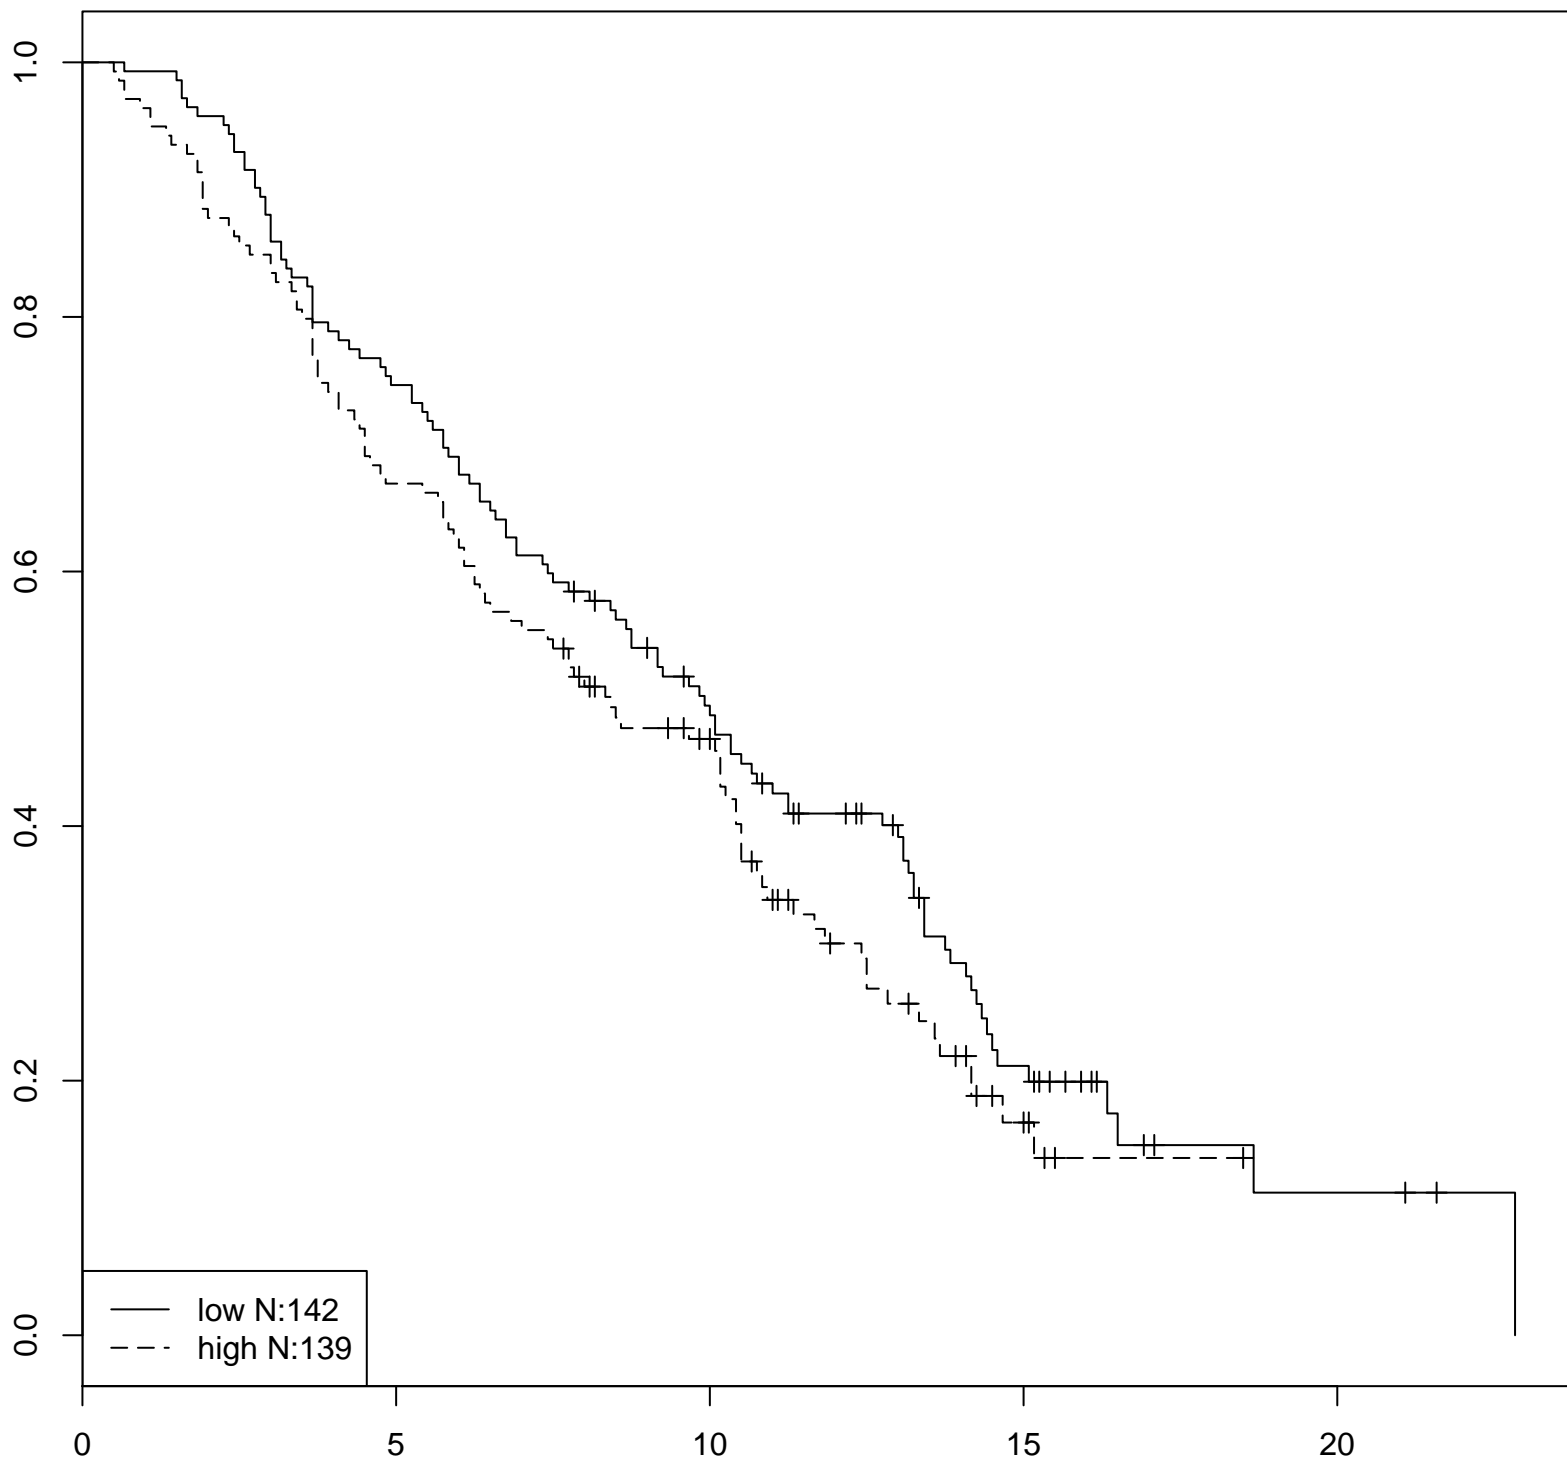

# Survival by APEX1 expression

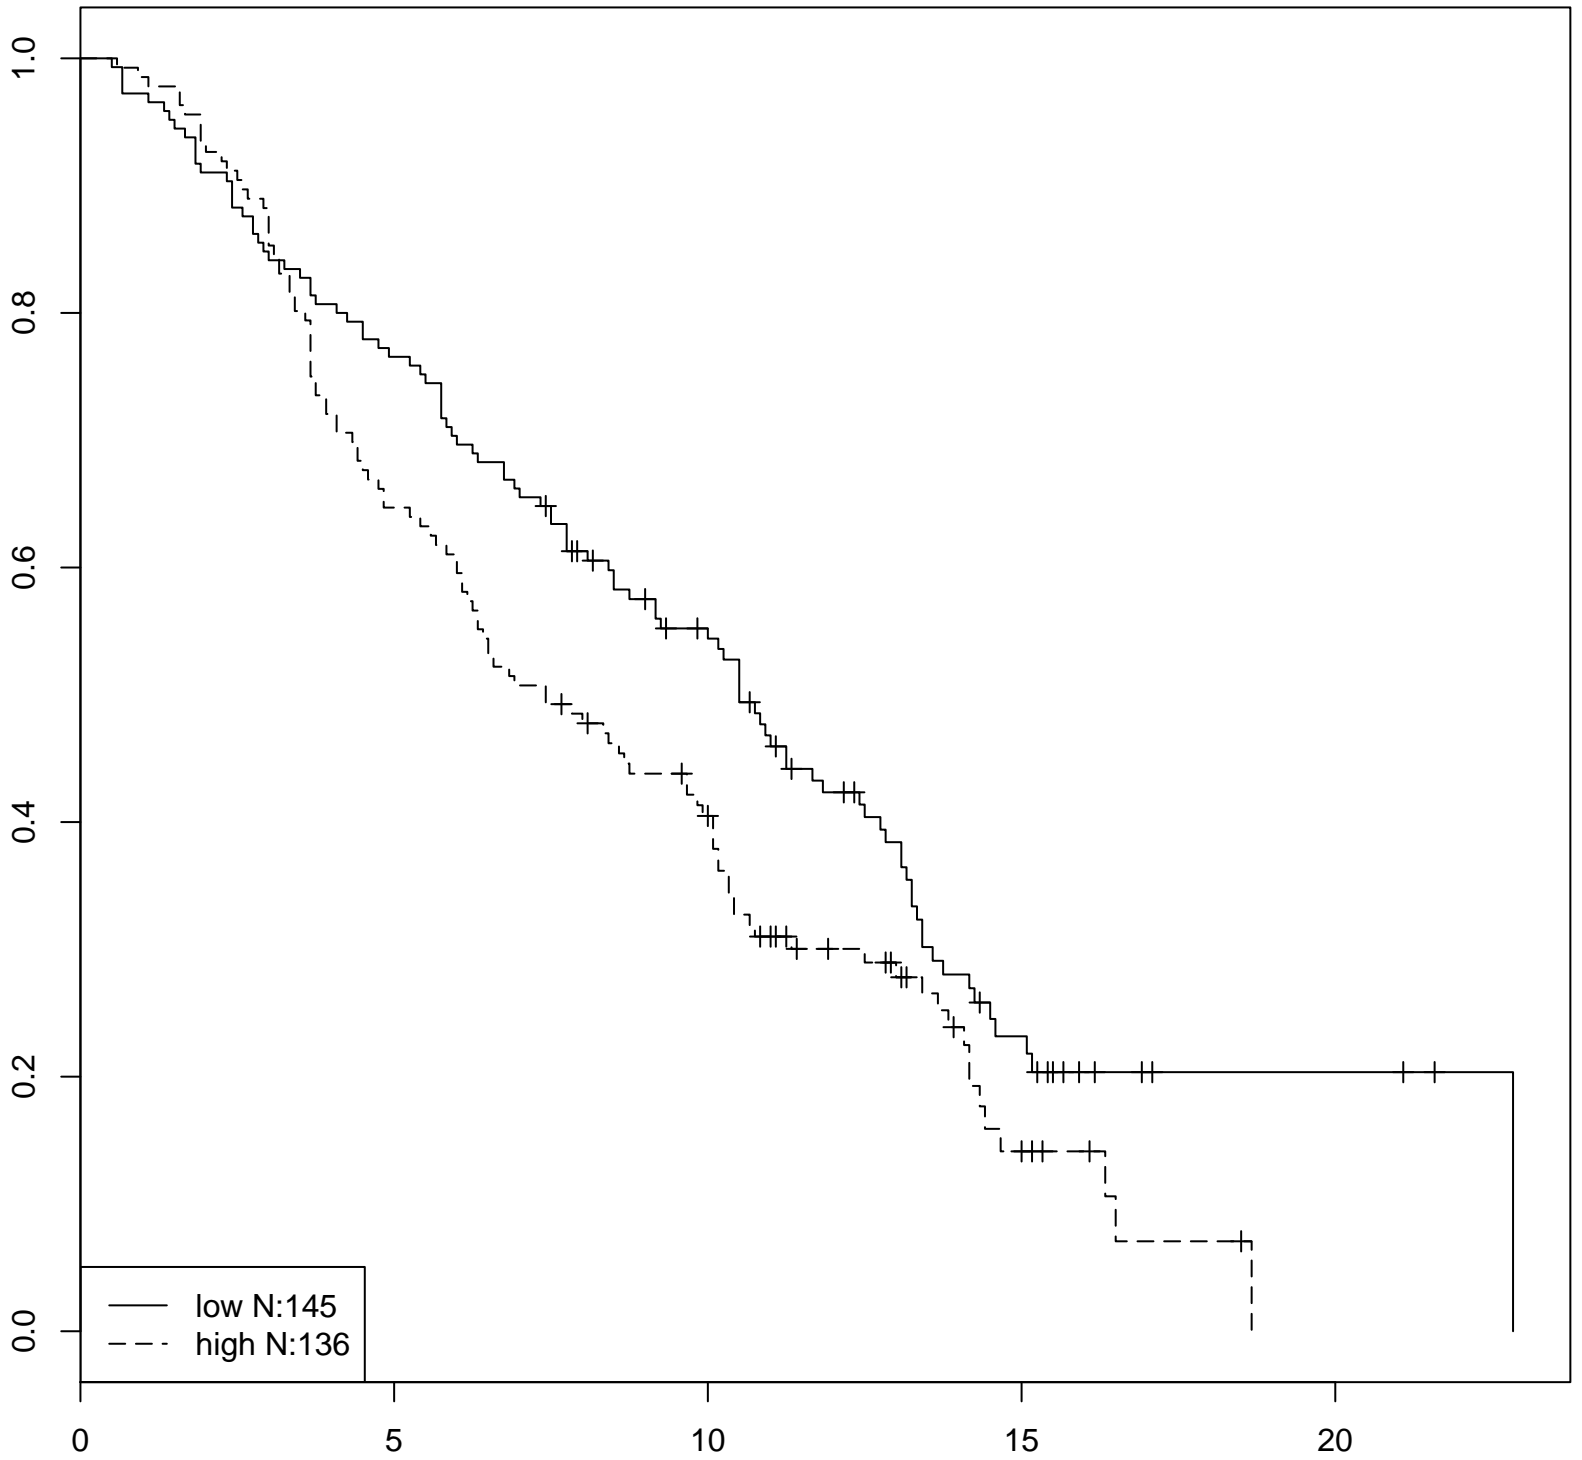

years

log-rank test p-value = 0.018

# Survival by APOA2 expression

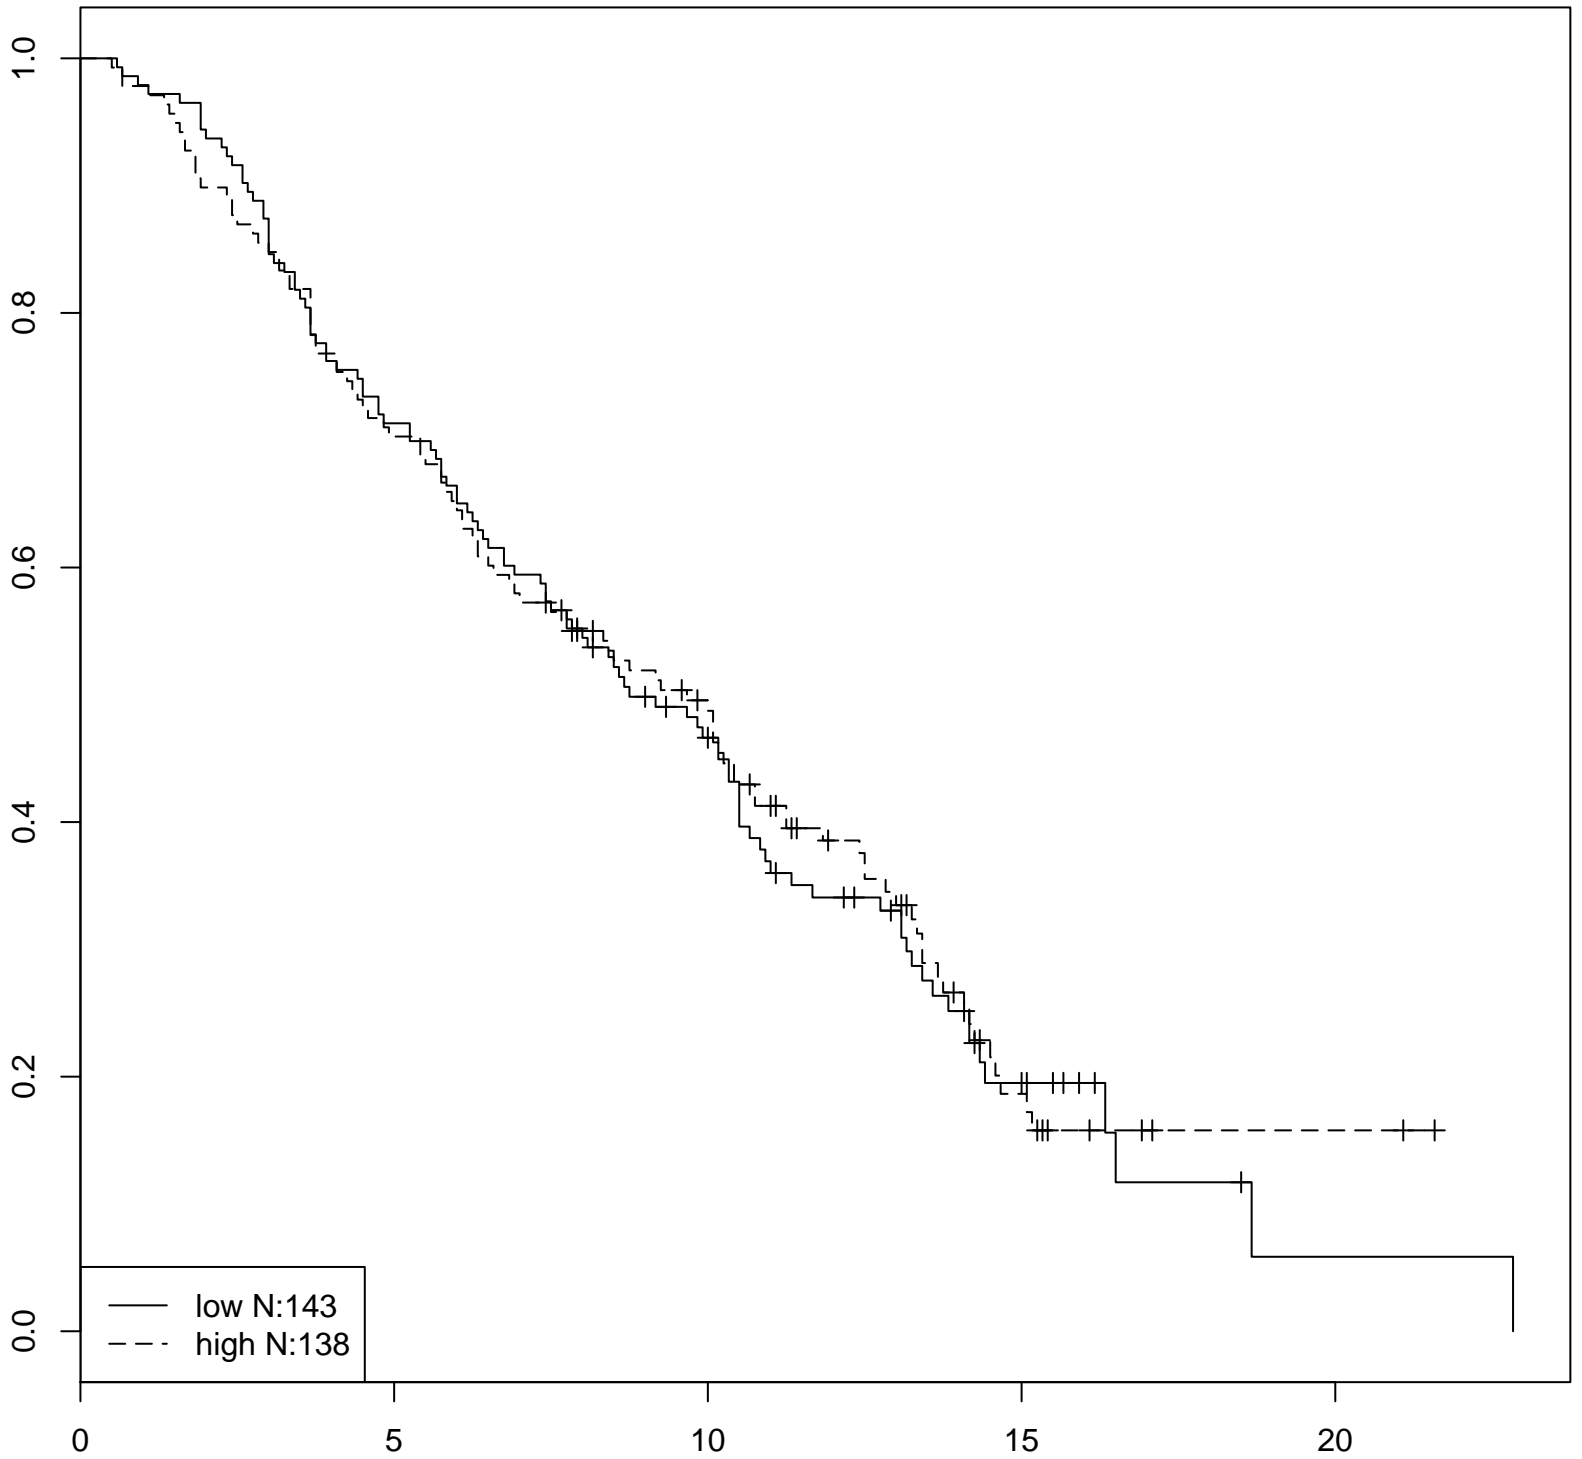

# Survival by AR expression

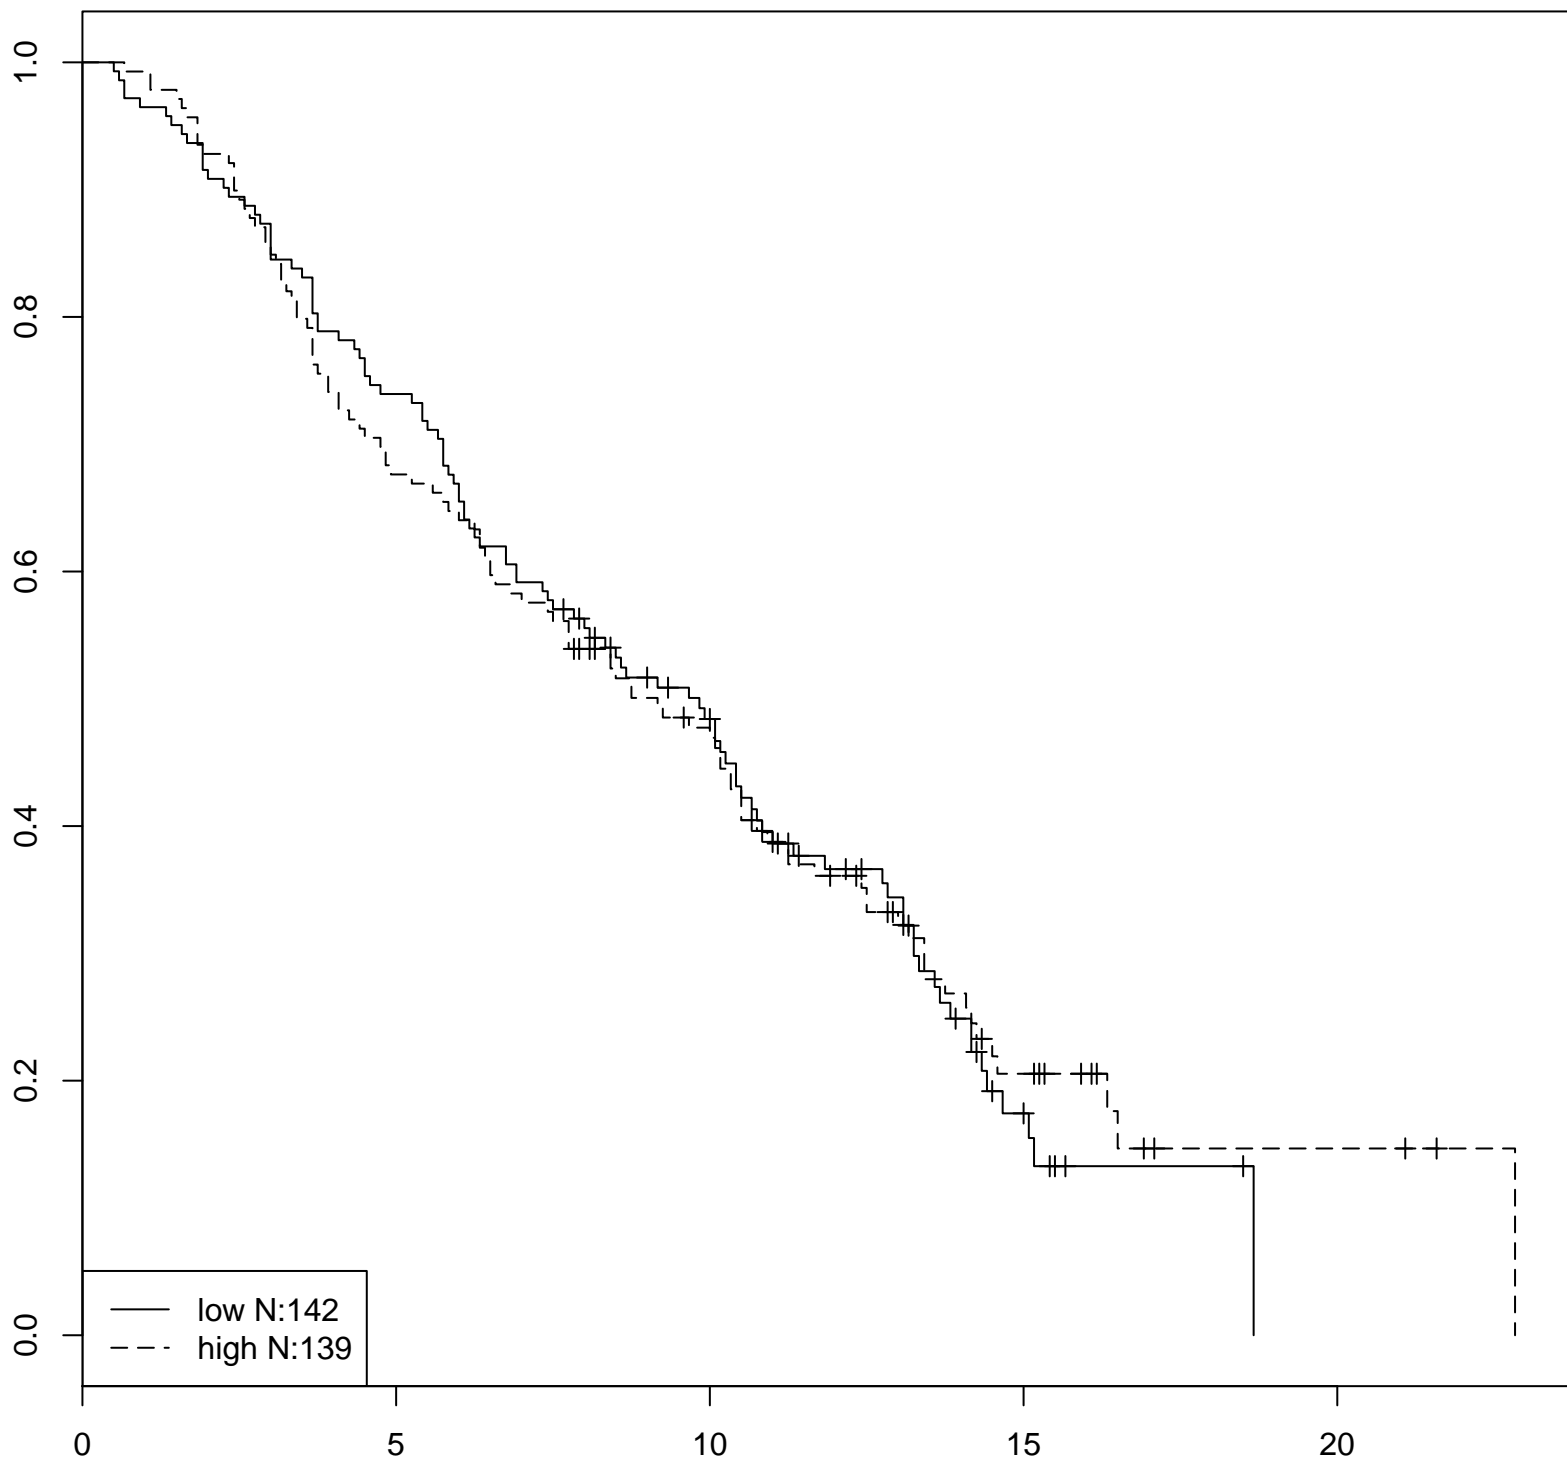

years

log-rank test p-value = 0.815

# Survival by AREG expression

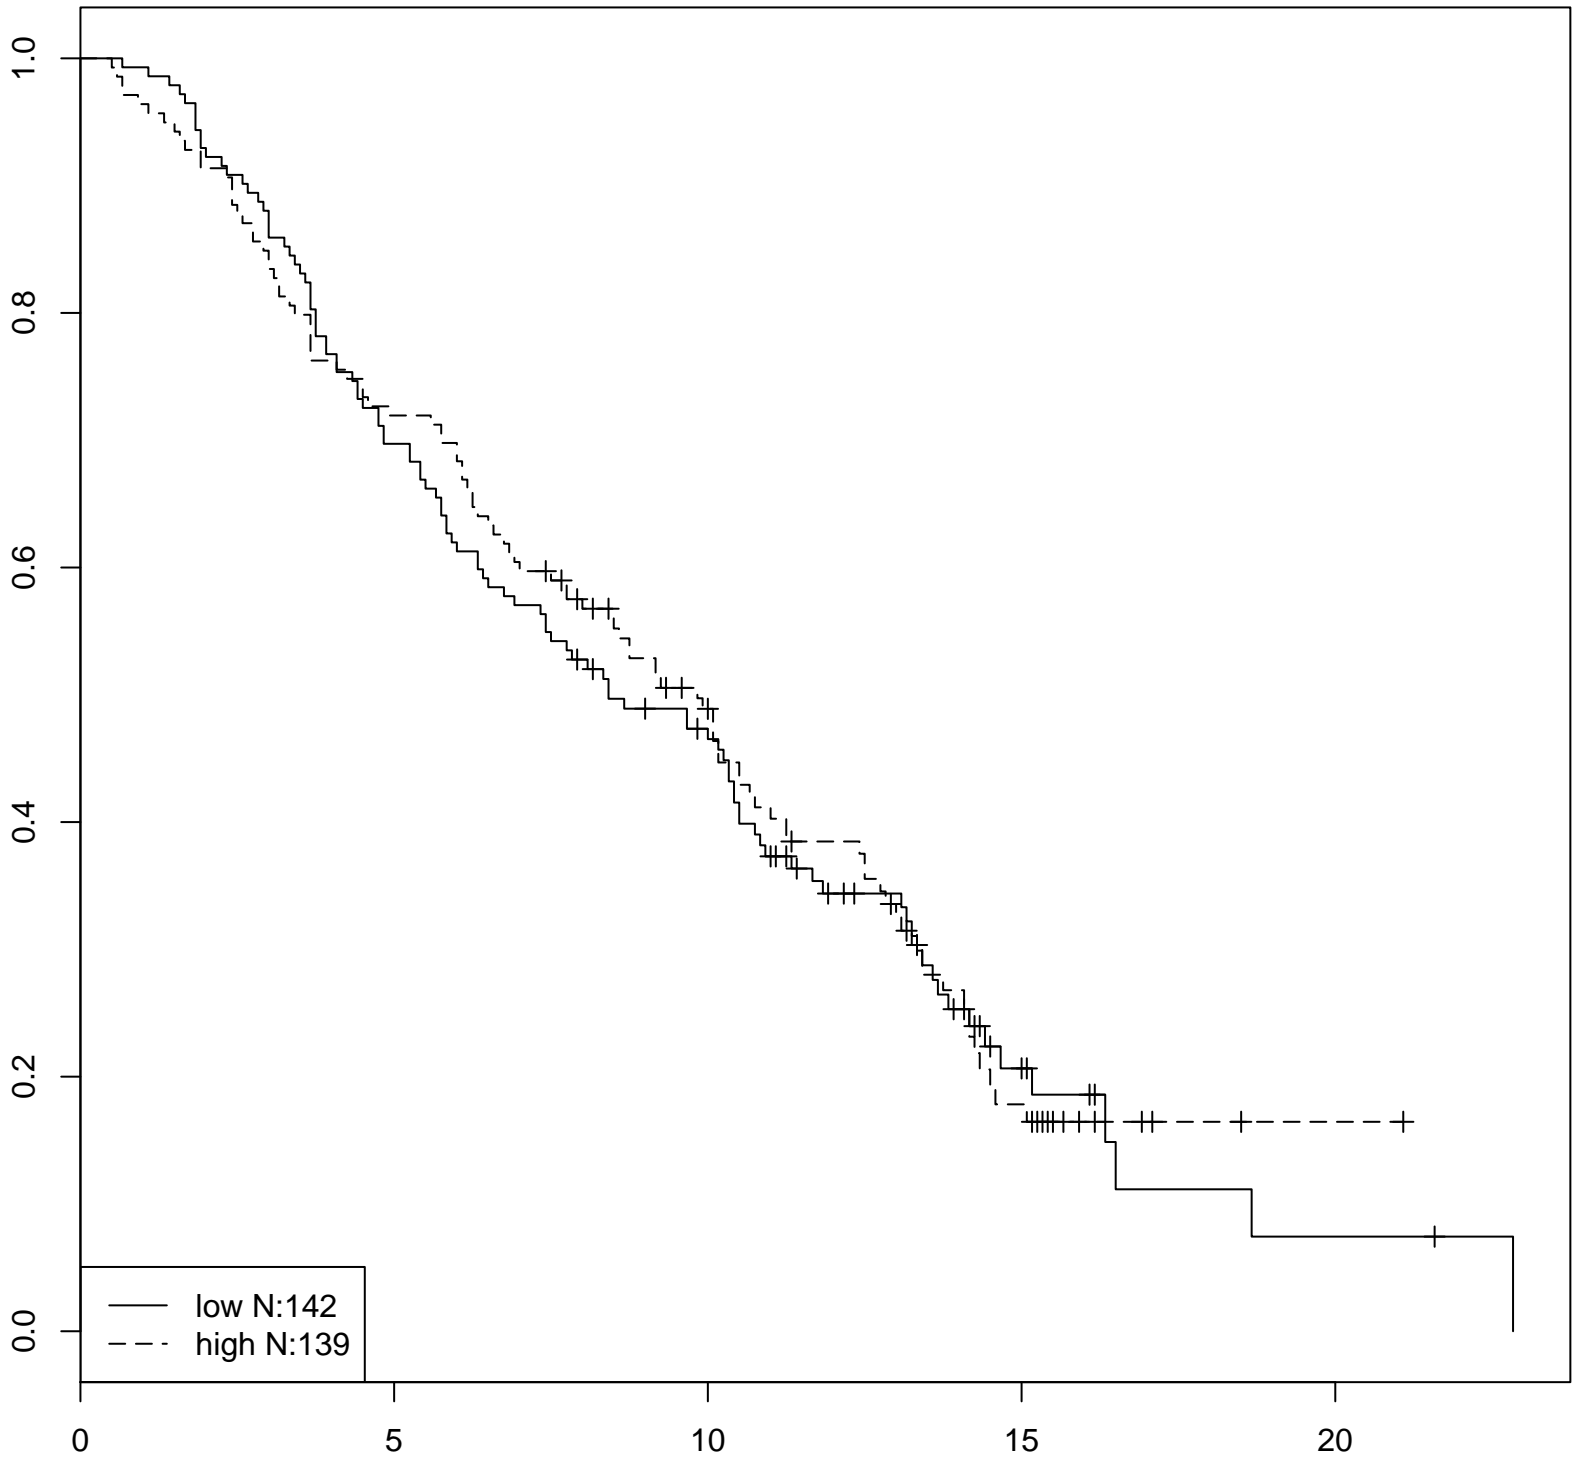

# Survival by ARF4 expression

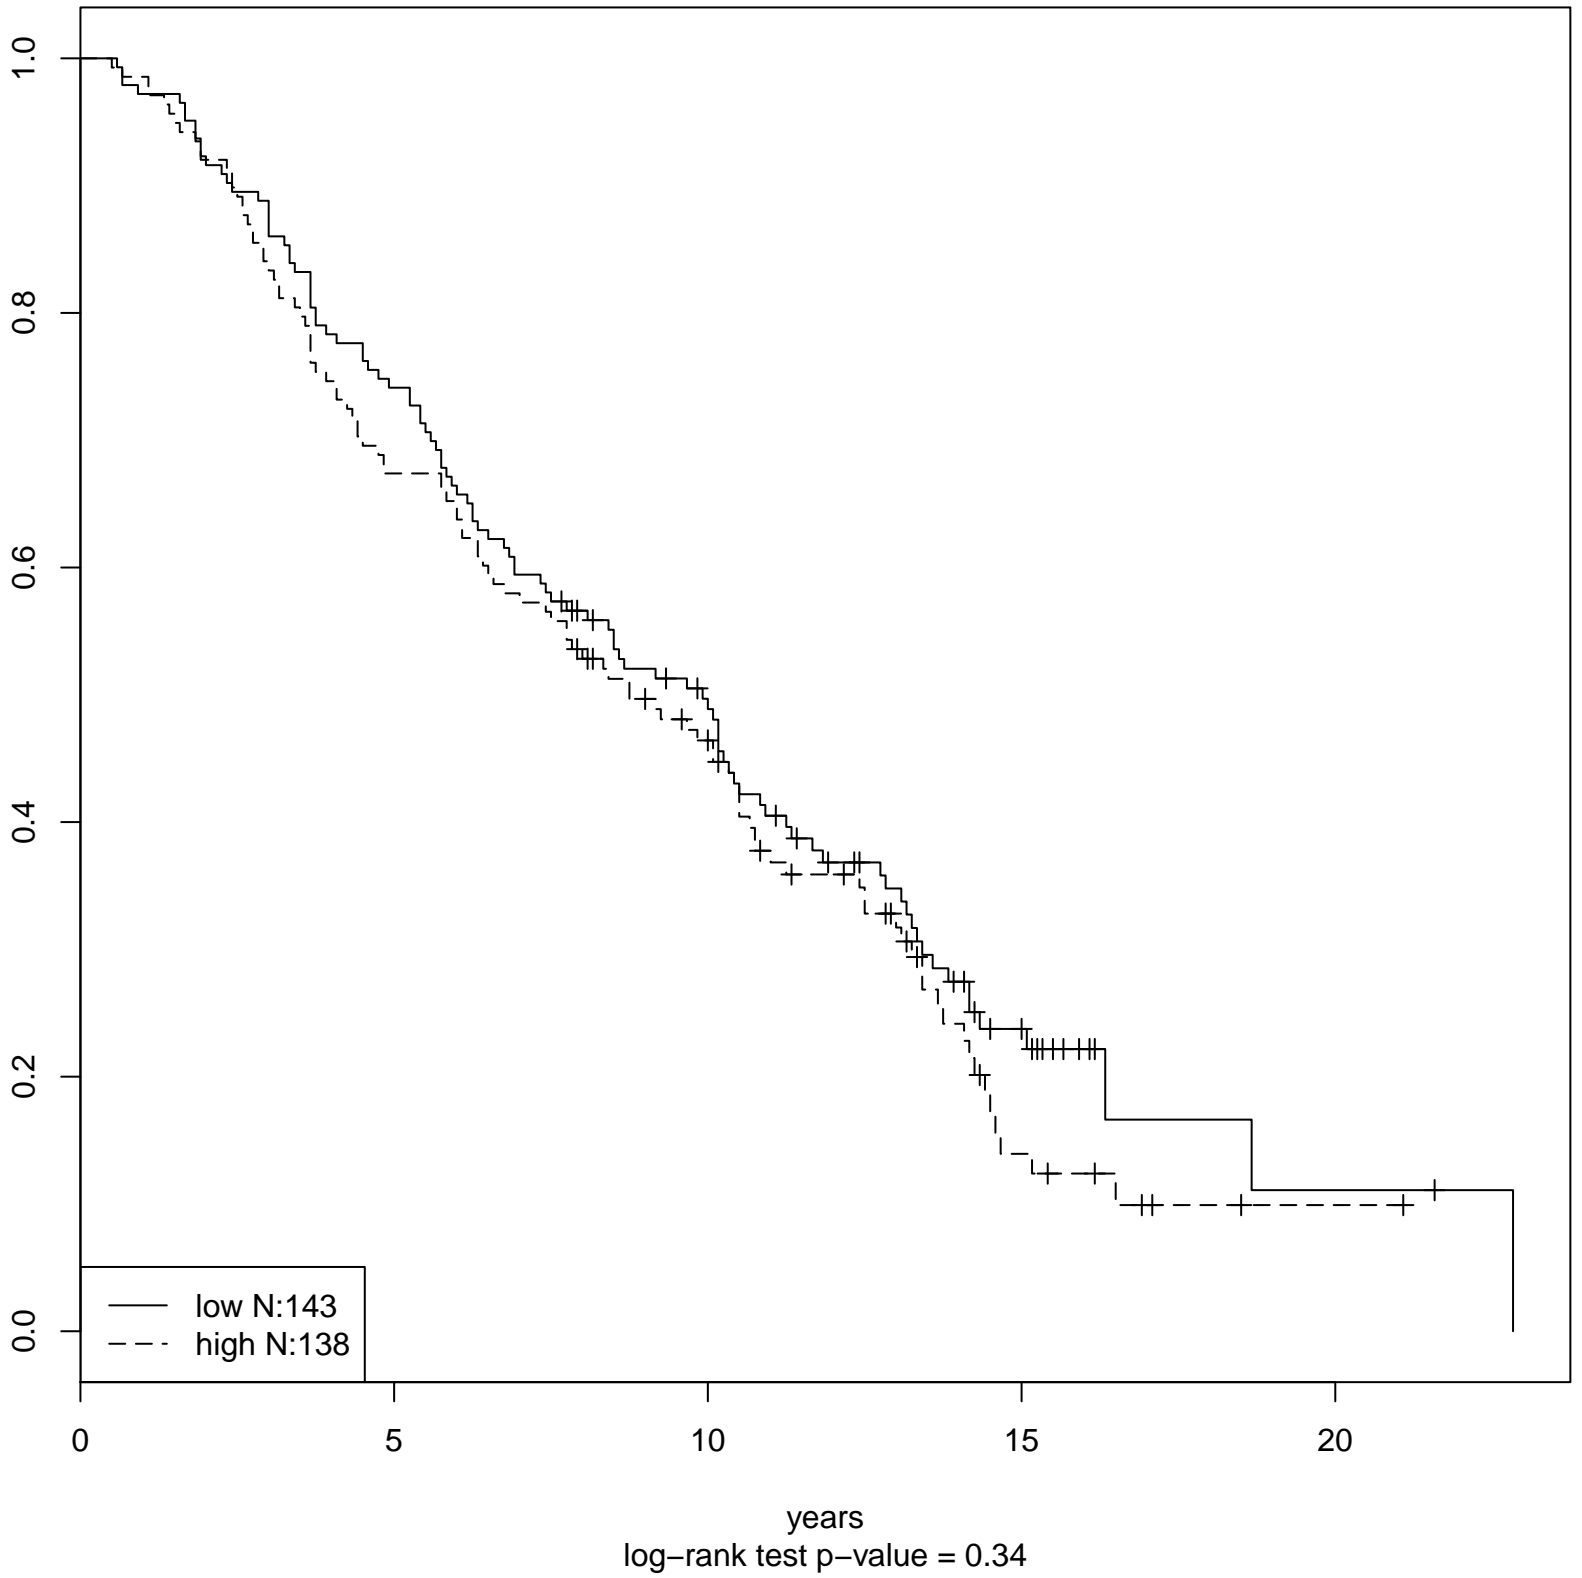

# Survival by ATM expression

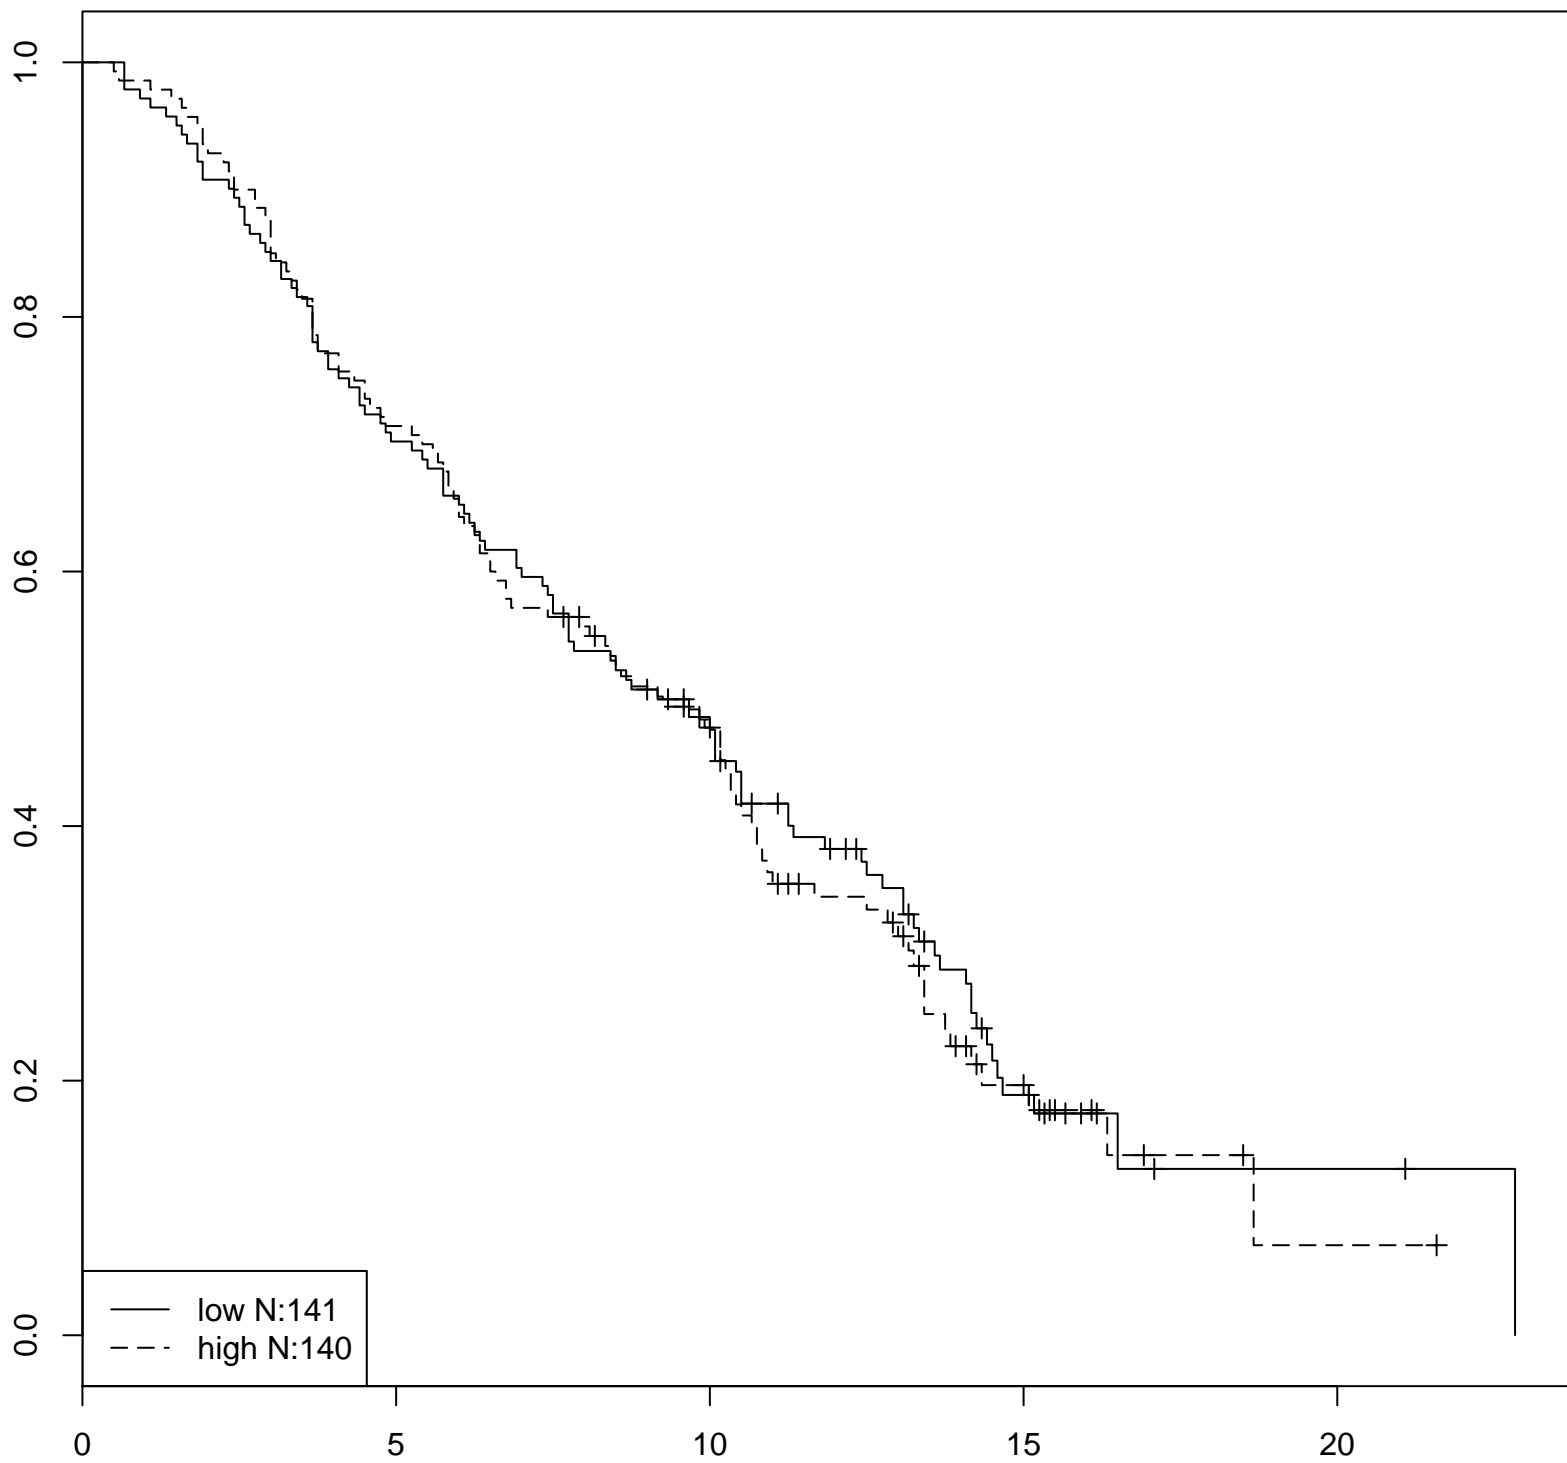

years

log-rank test p-value = 0.748

# Survival by AZGP1 expression

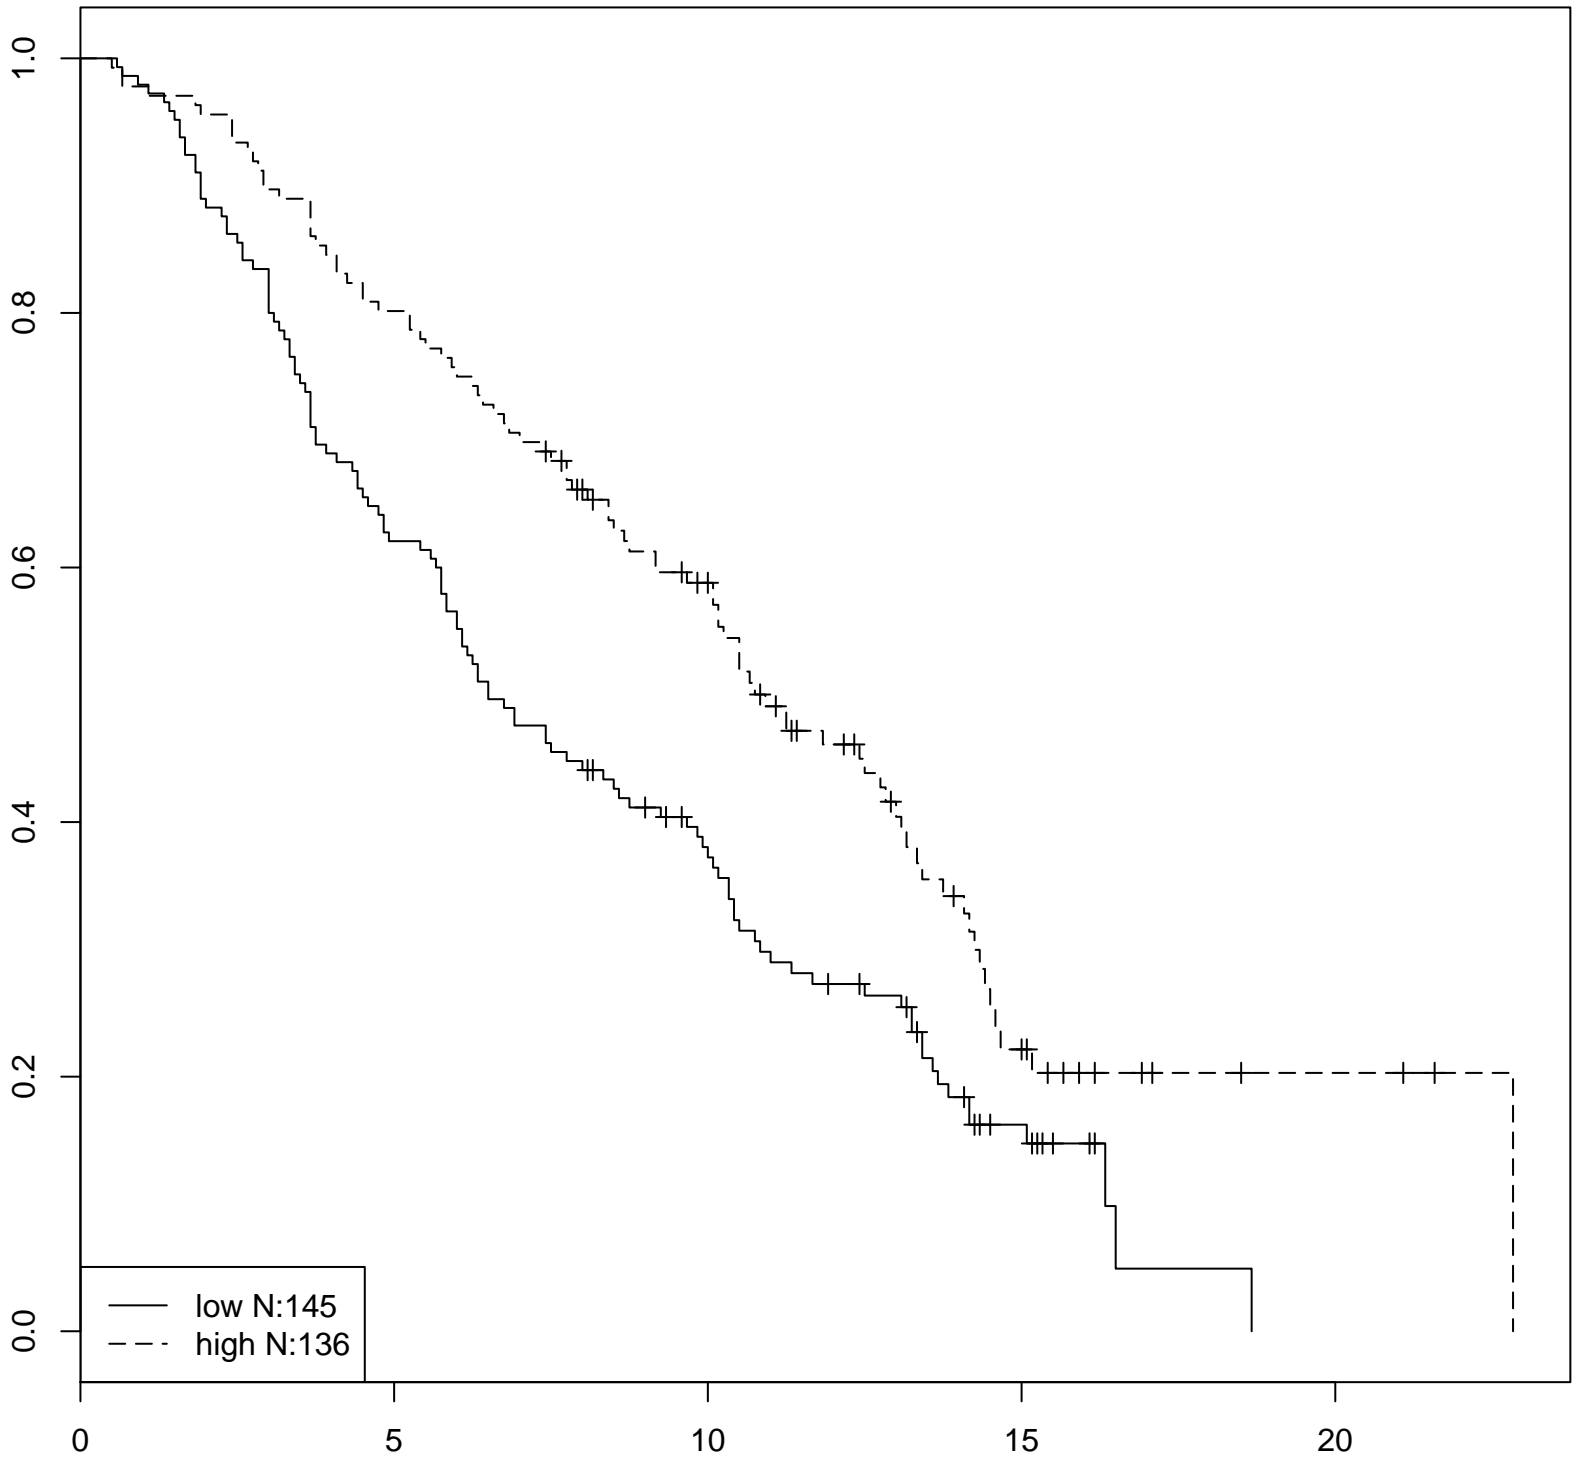

years  
log-rank test p-value = 0



# Survival by B2M expression

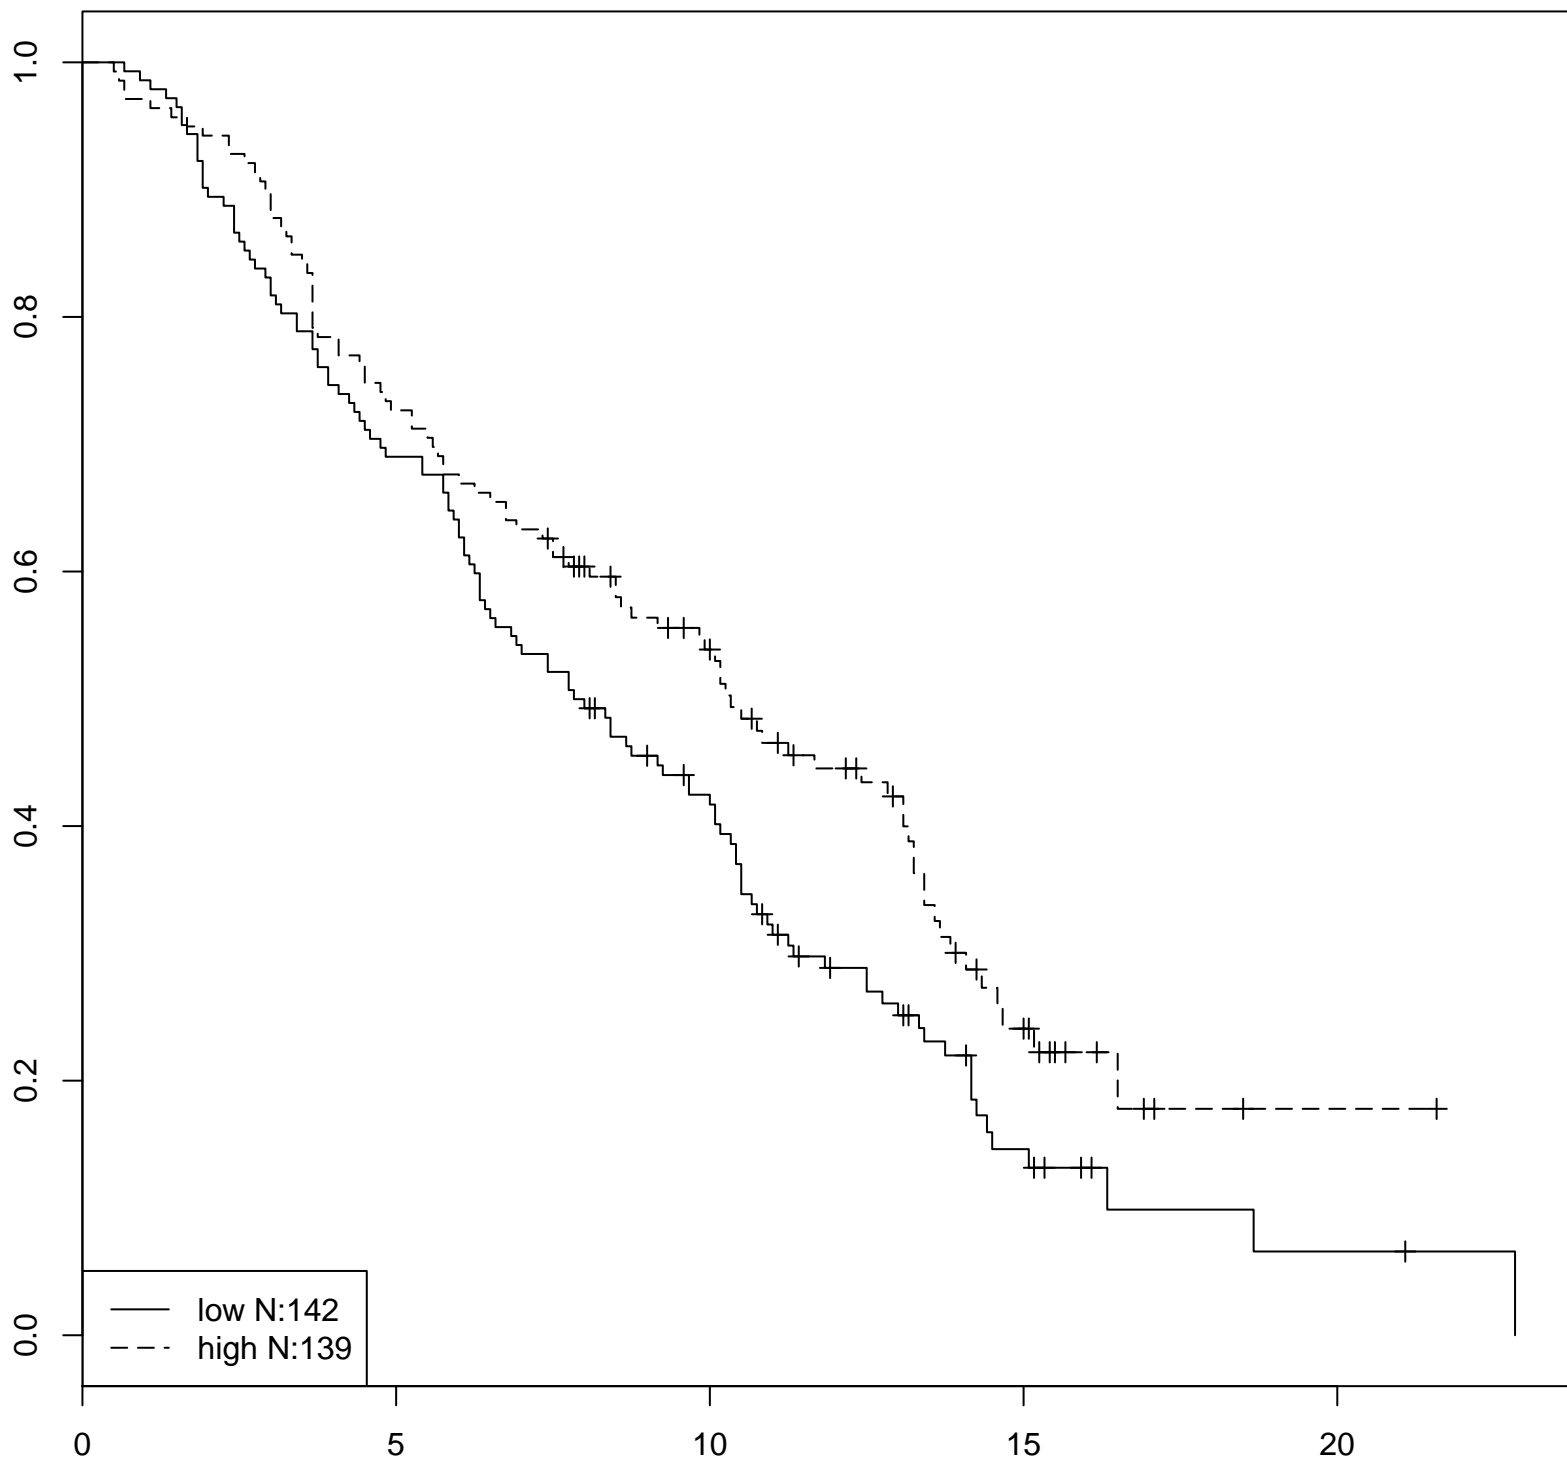

years

log-rank test p-value = 0.021

# Survival by BAG1 expression

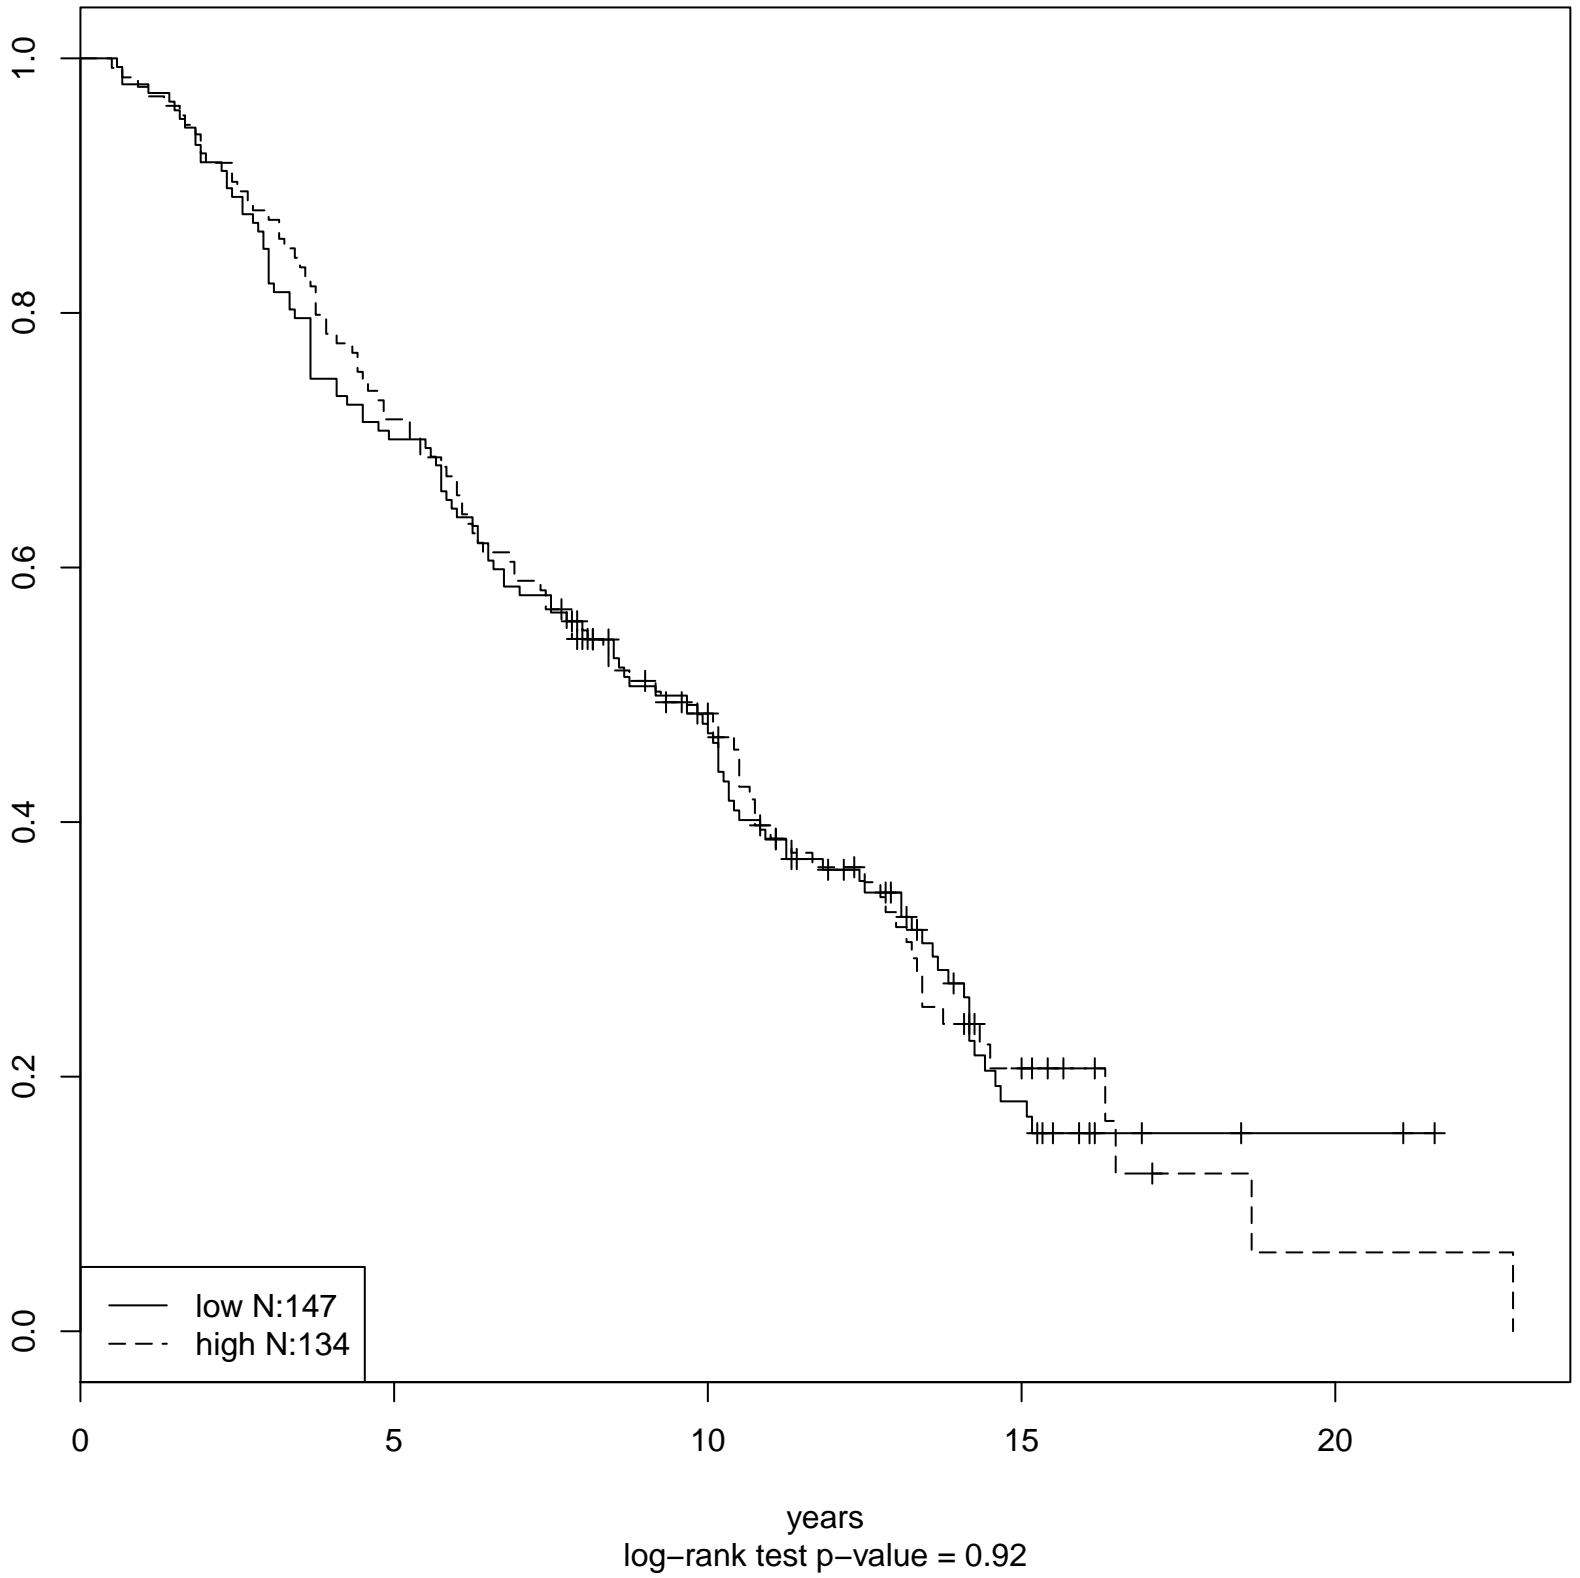

# Survival by BAP1 expression

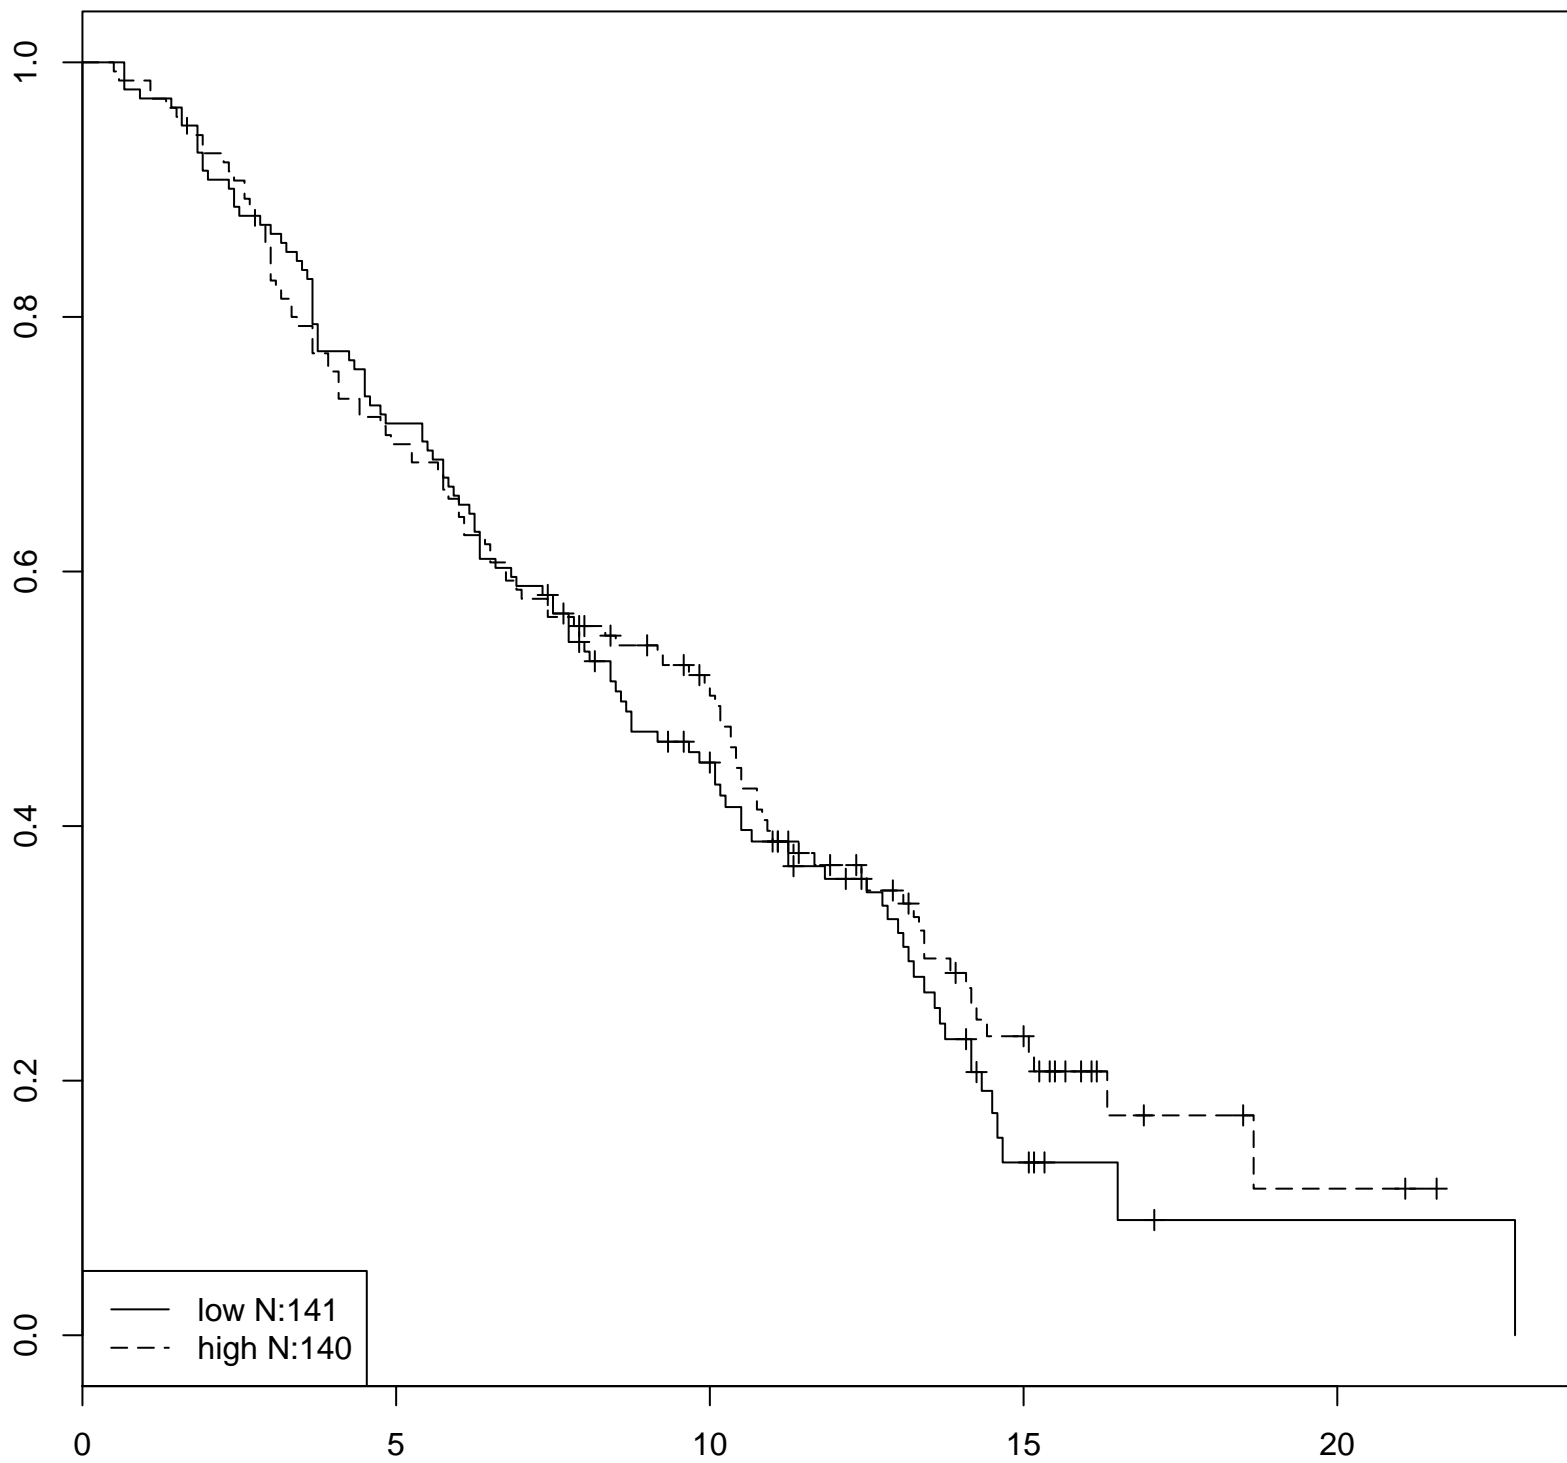

# Survival by BCL2 expression

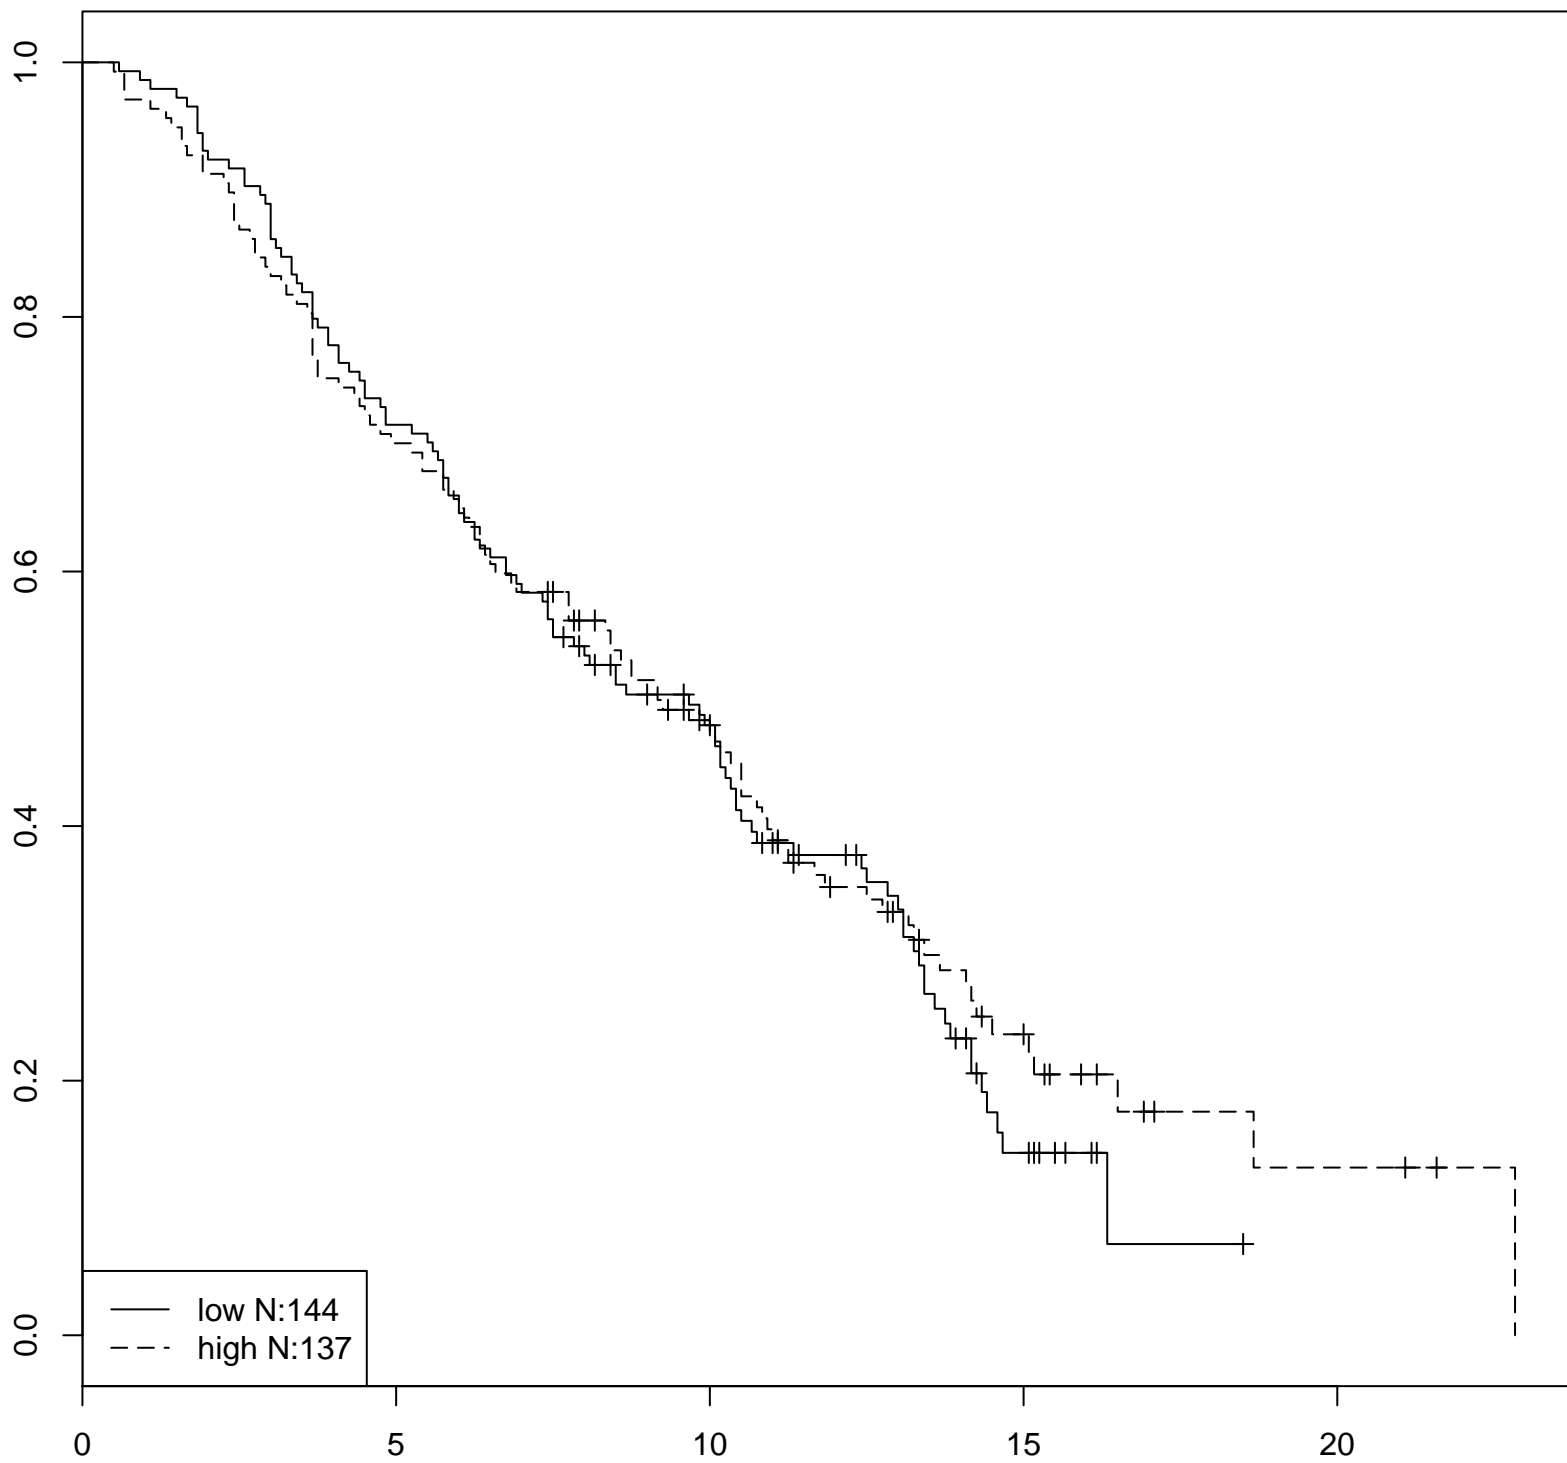

years

log-rank test p-value = 0.566

# Survival by BID expression

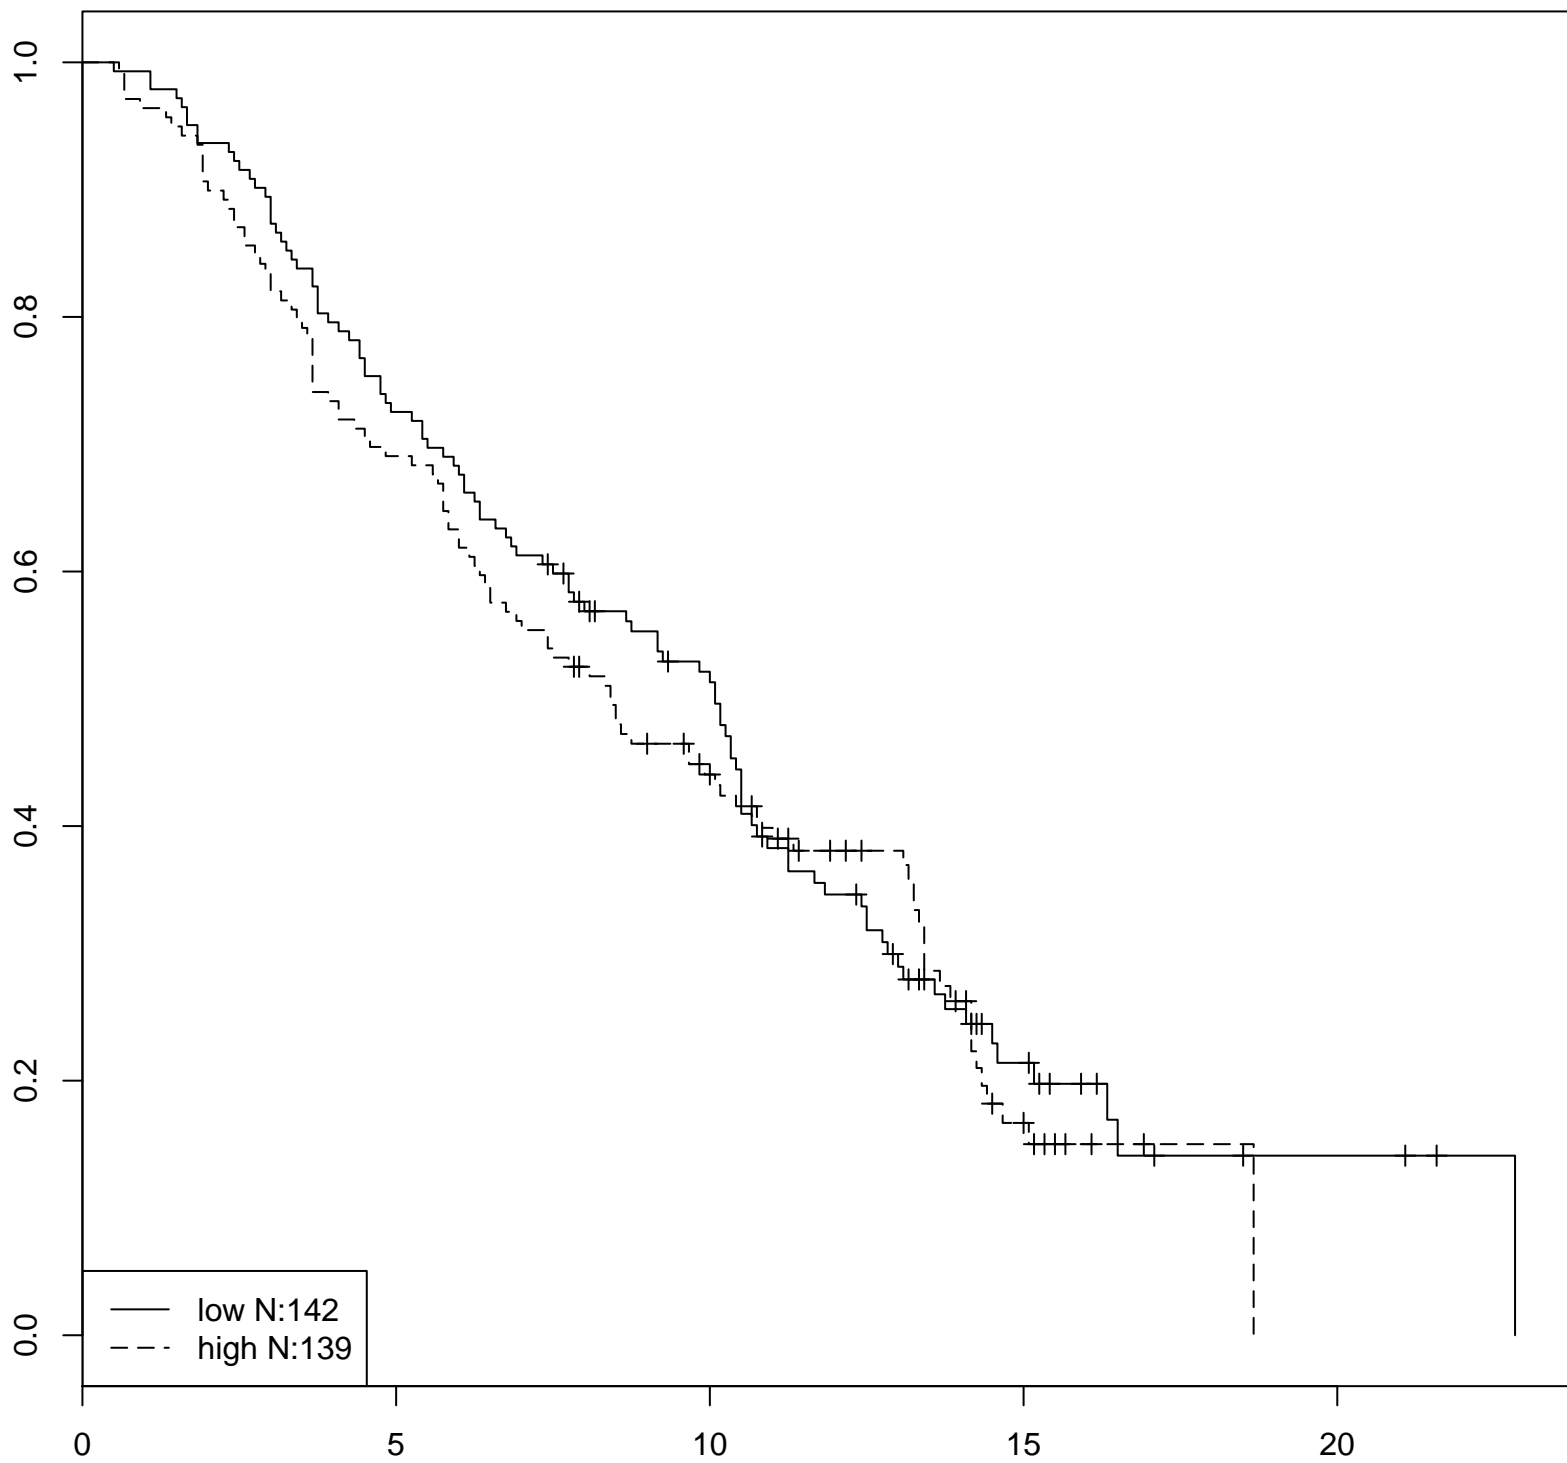

years

log-rank test p-value = 0.511

# Survival by BIRC5 expression

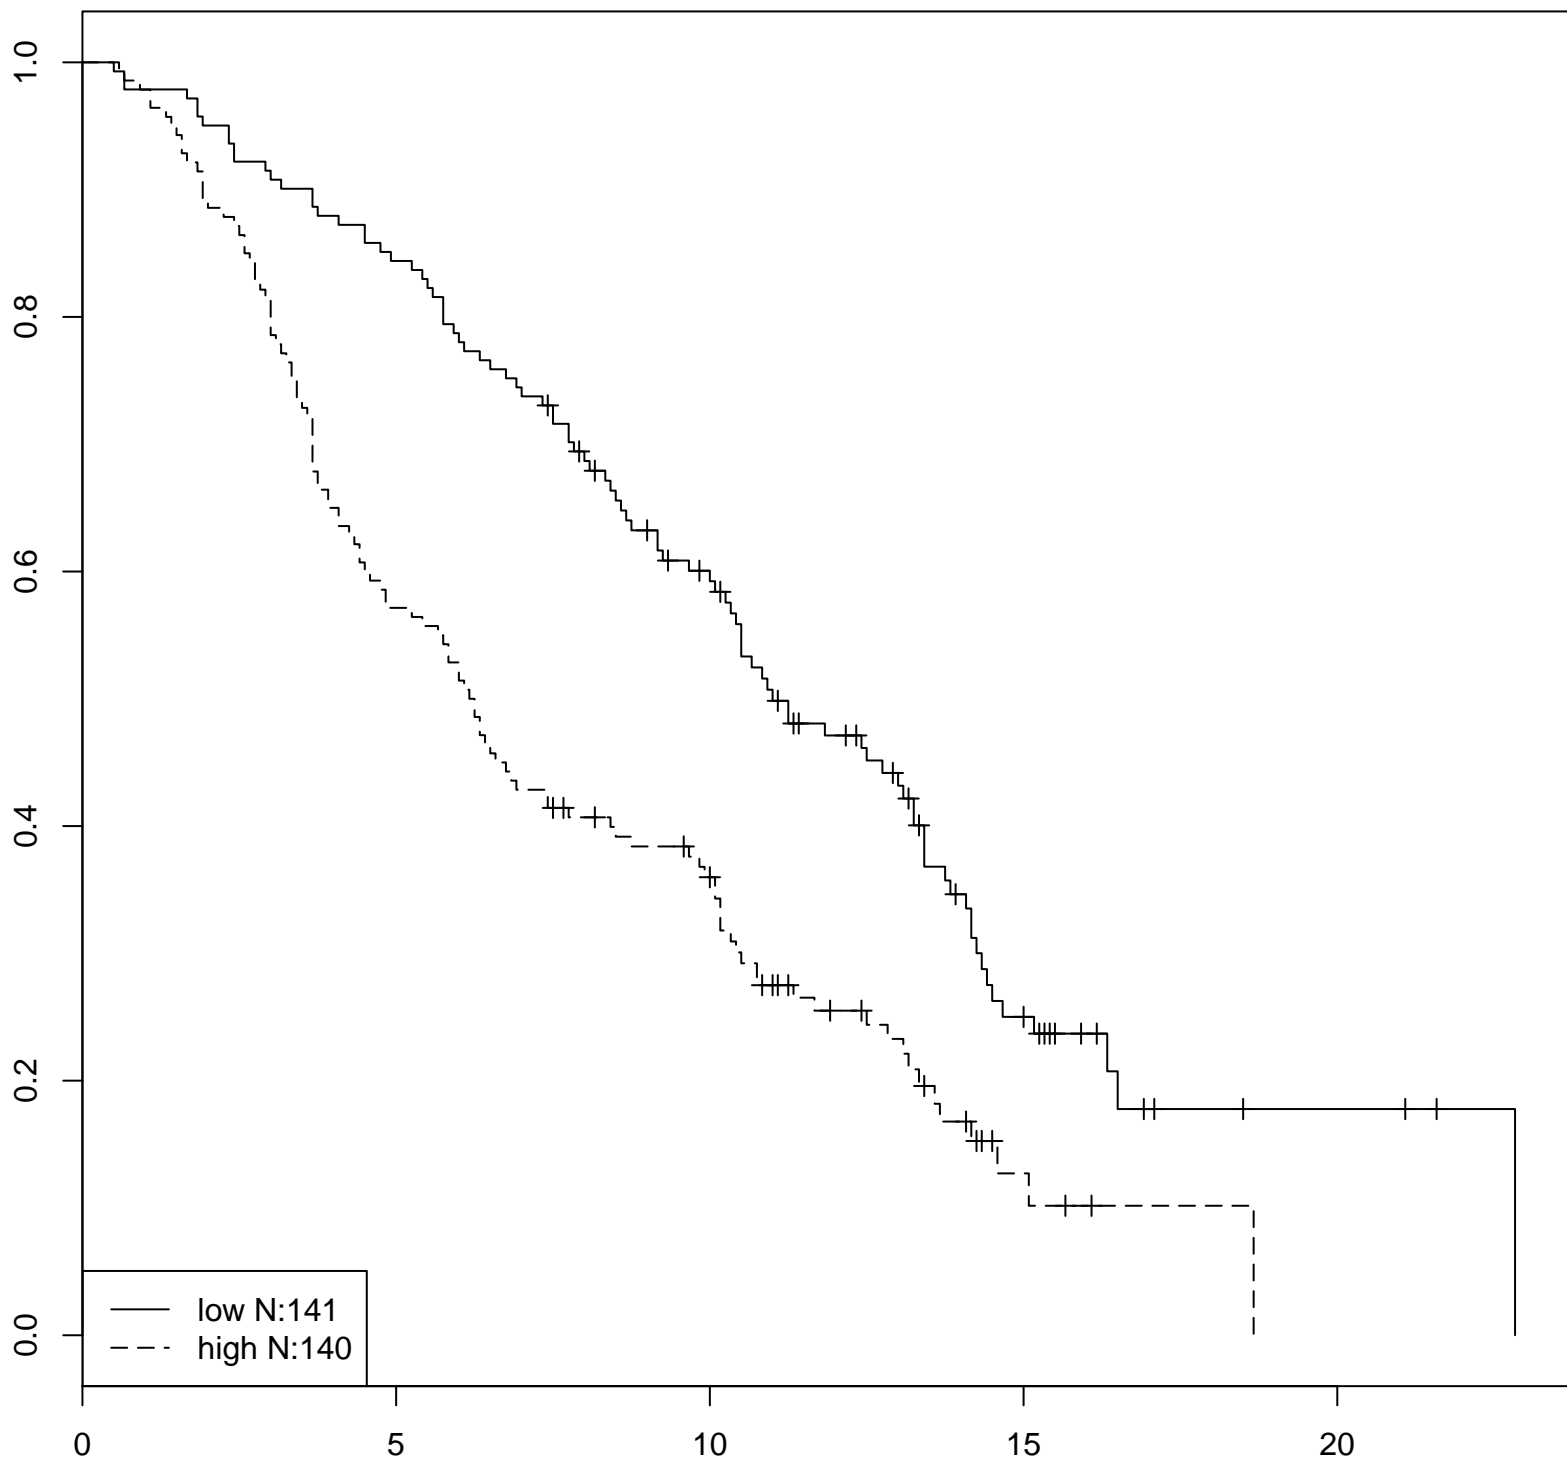

years

log-rank test p-value = 0

# Survival by BMP6 expression

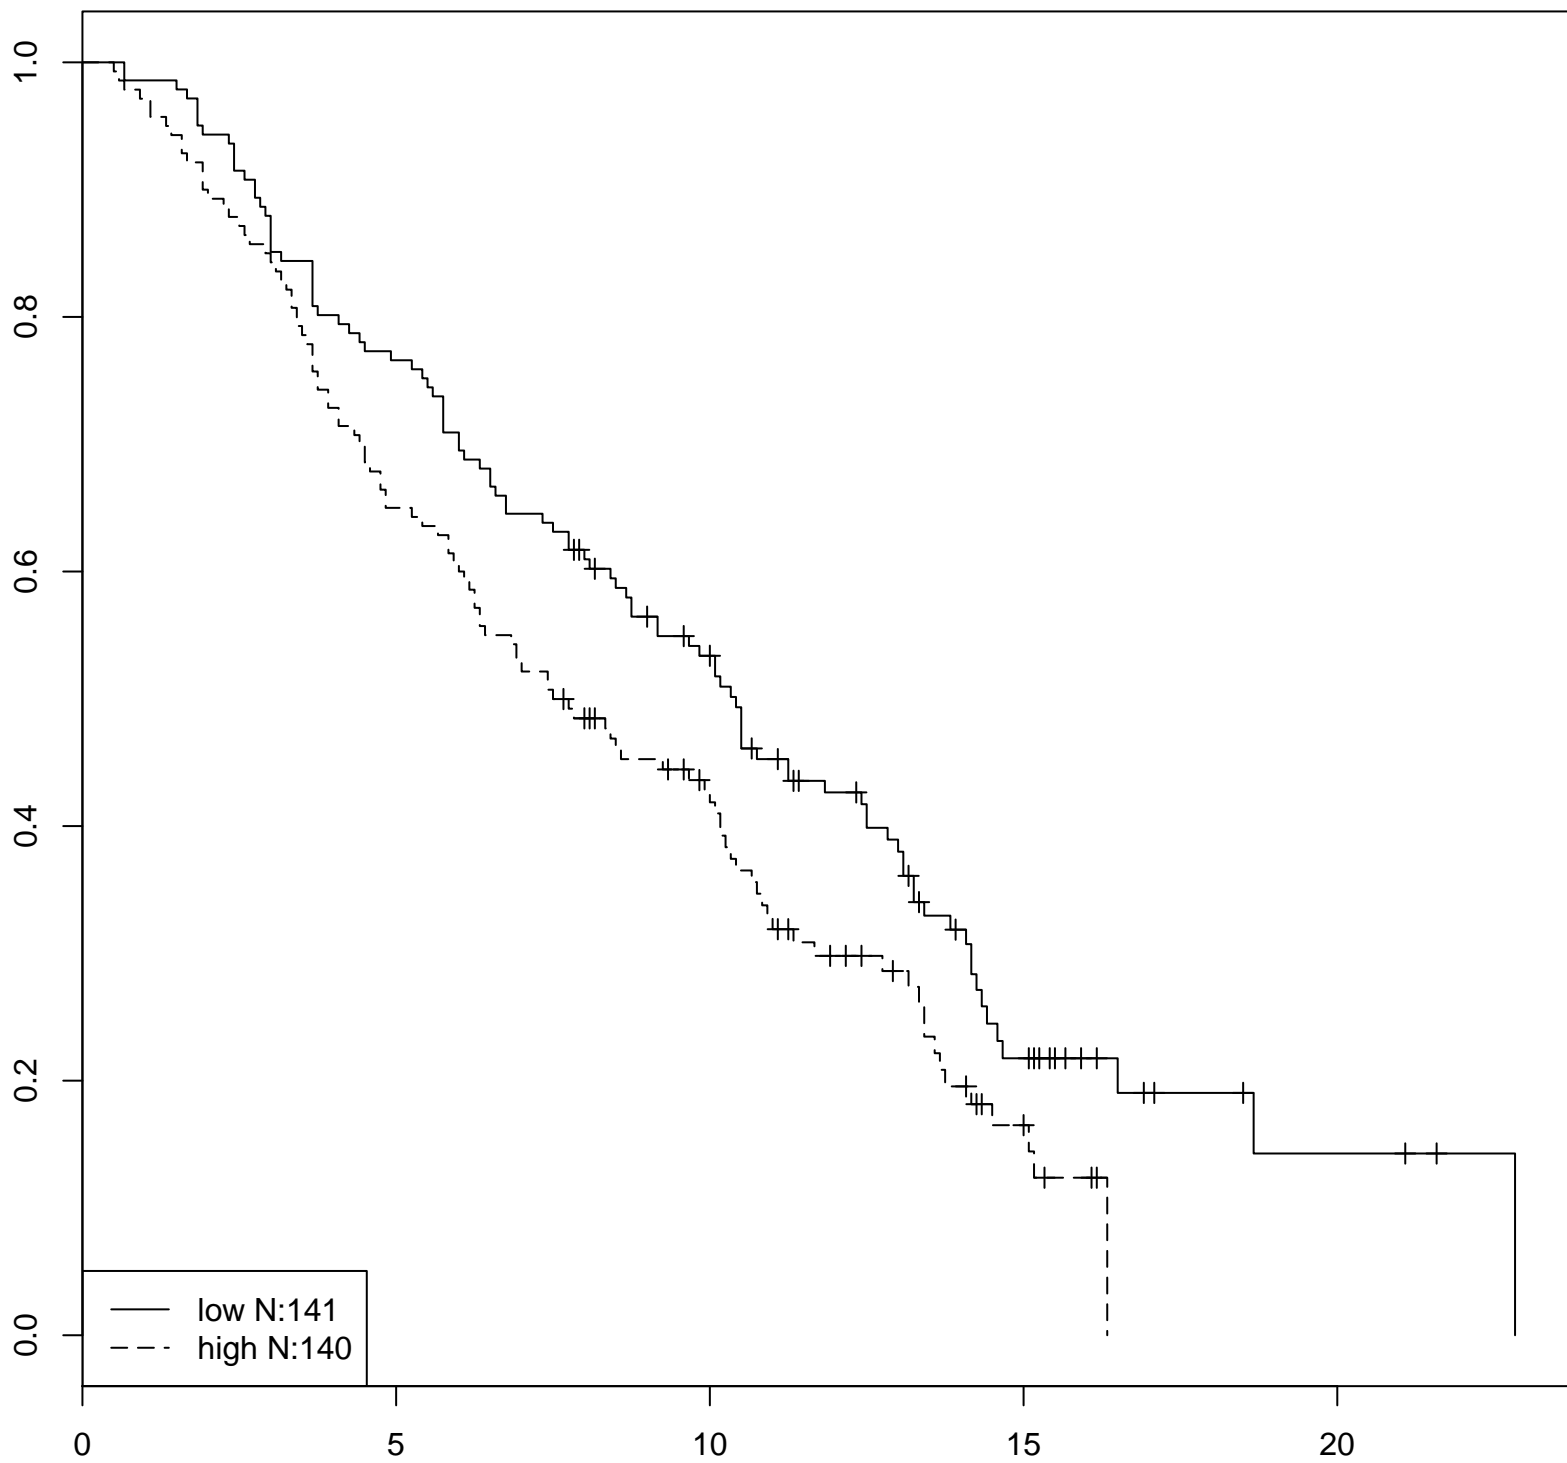

years

log-rank test p-value = 0.018

# Survival by BMX expression

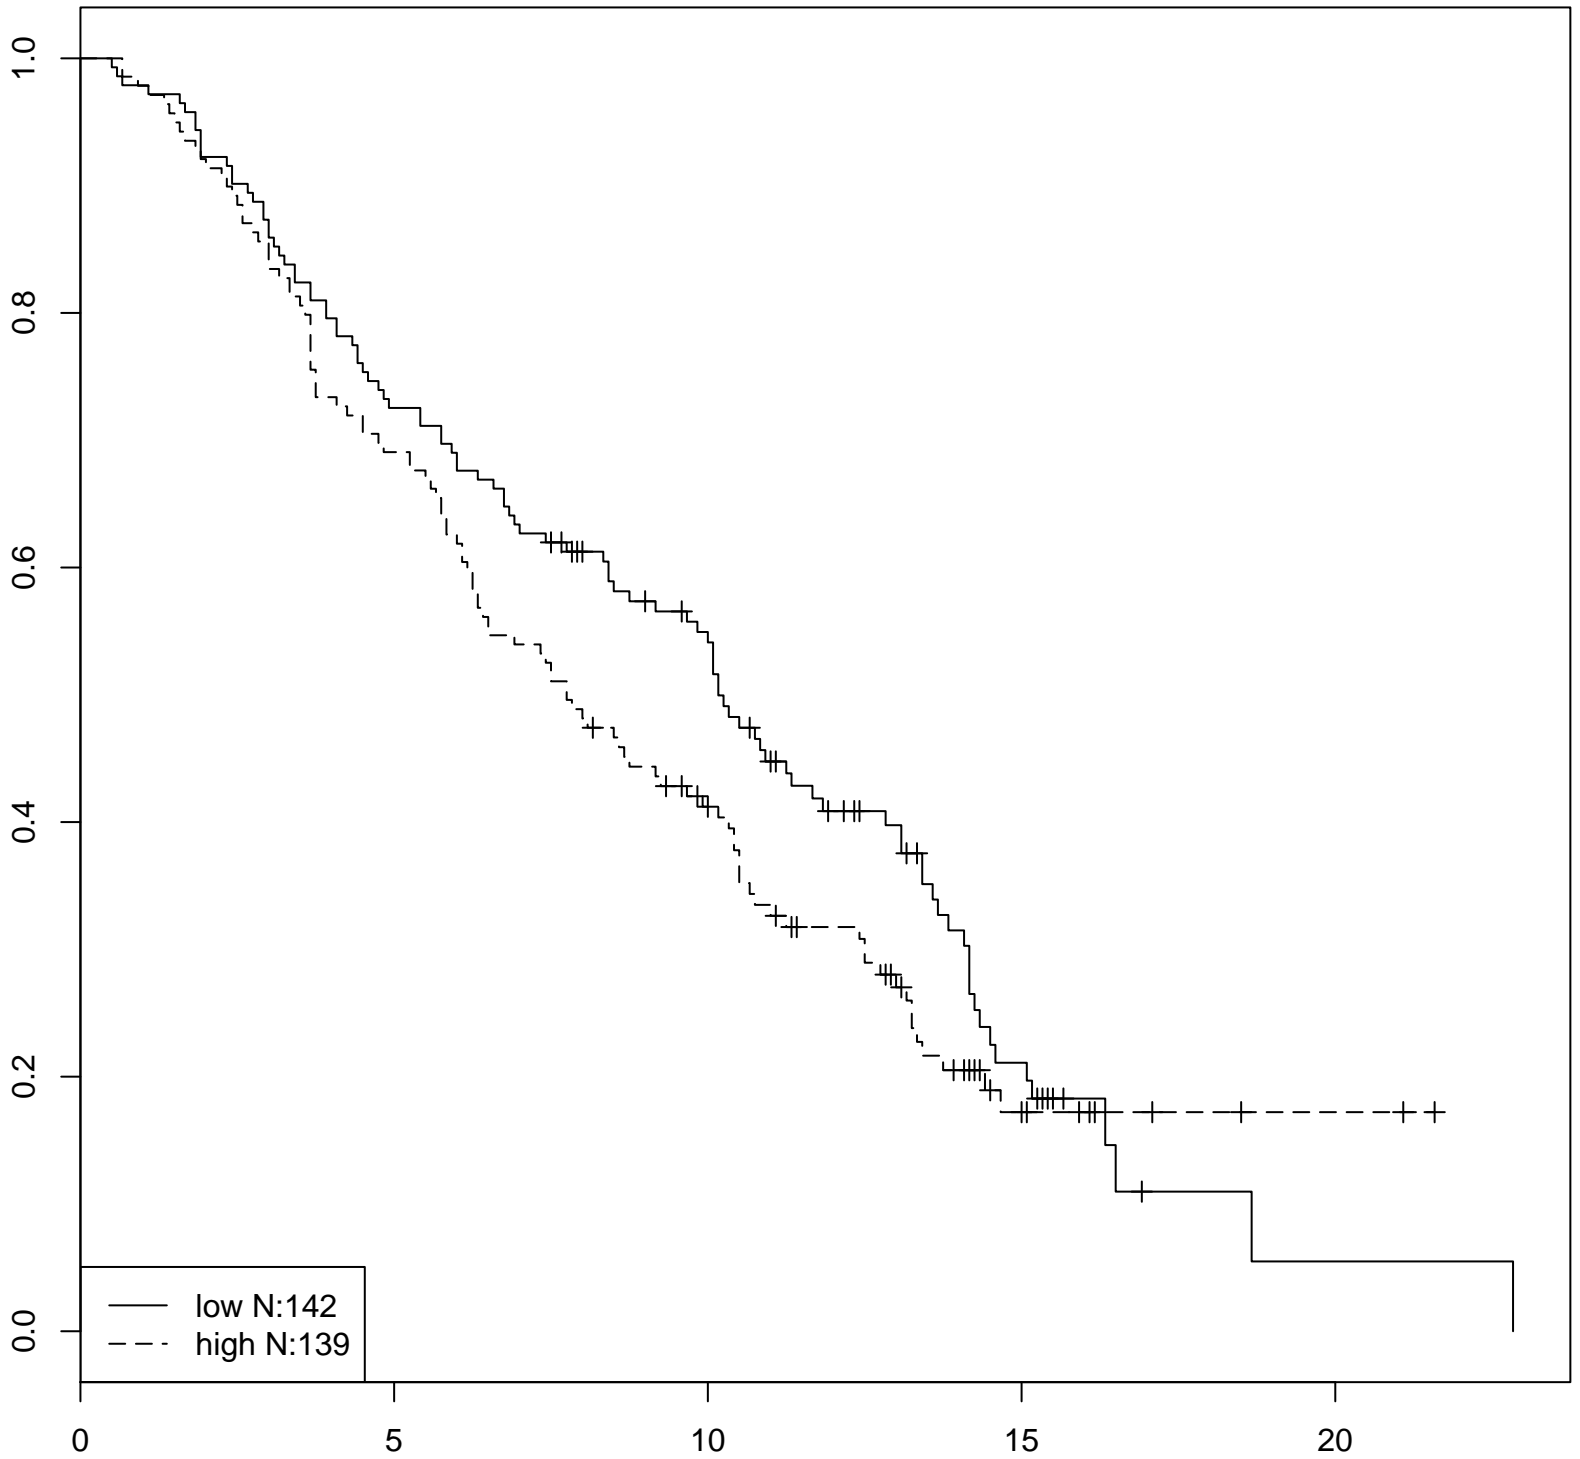



# Survival by BRCA1 expression

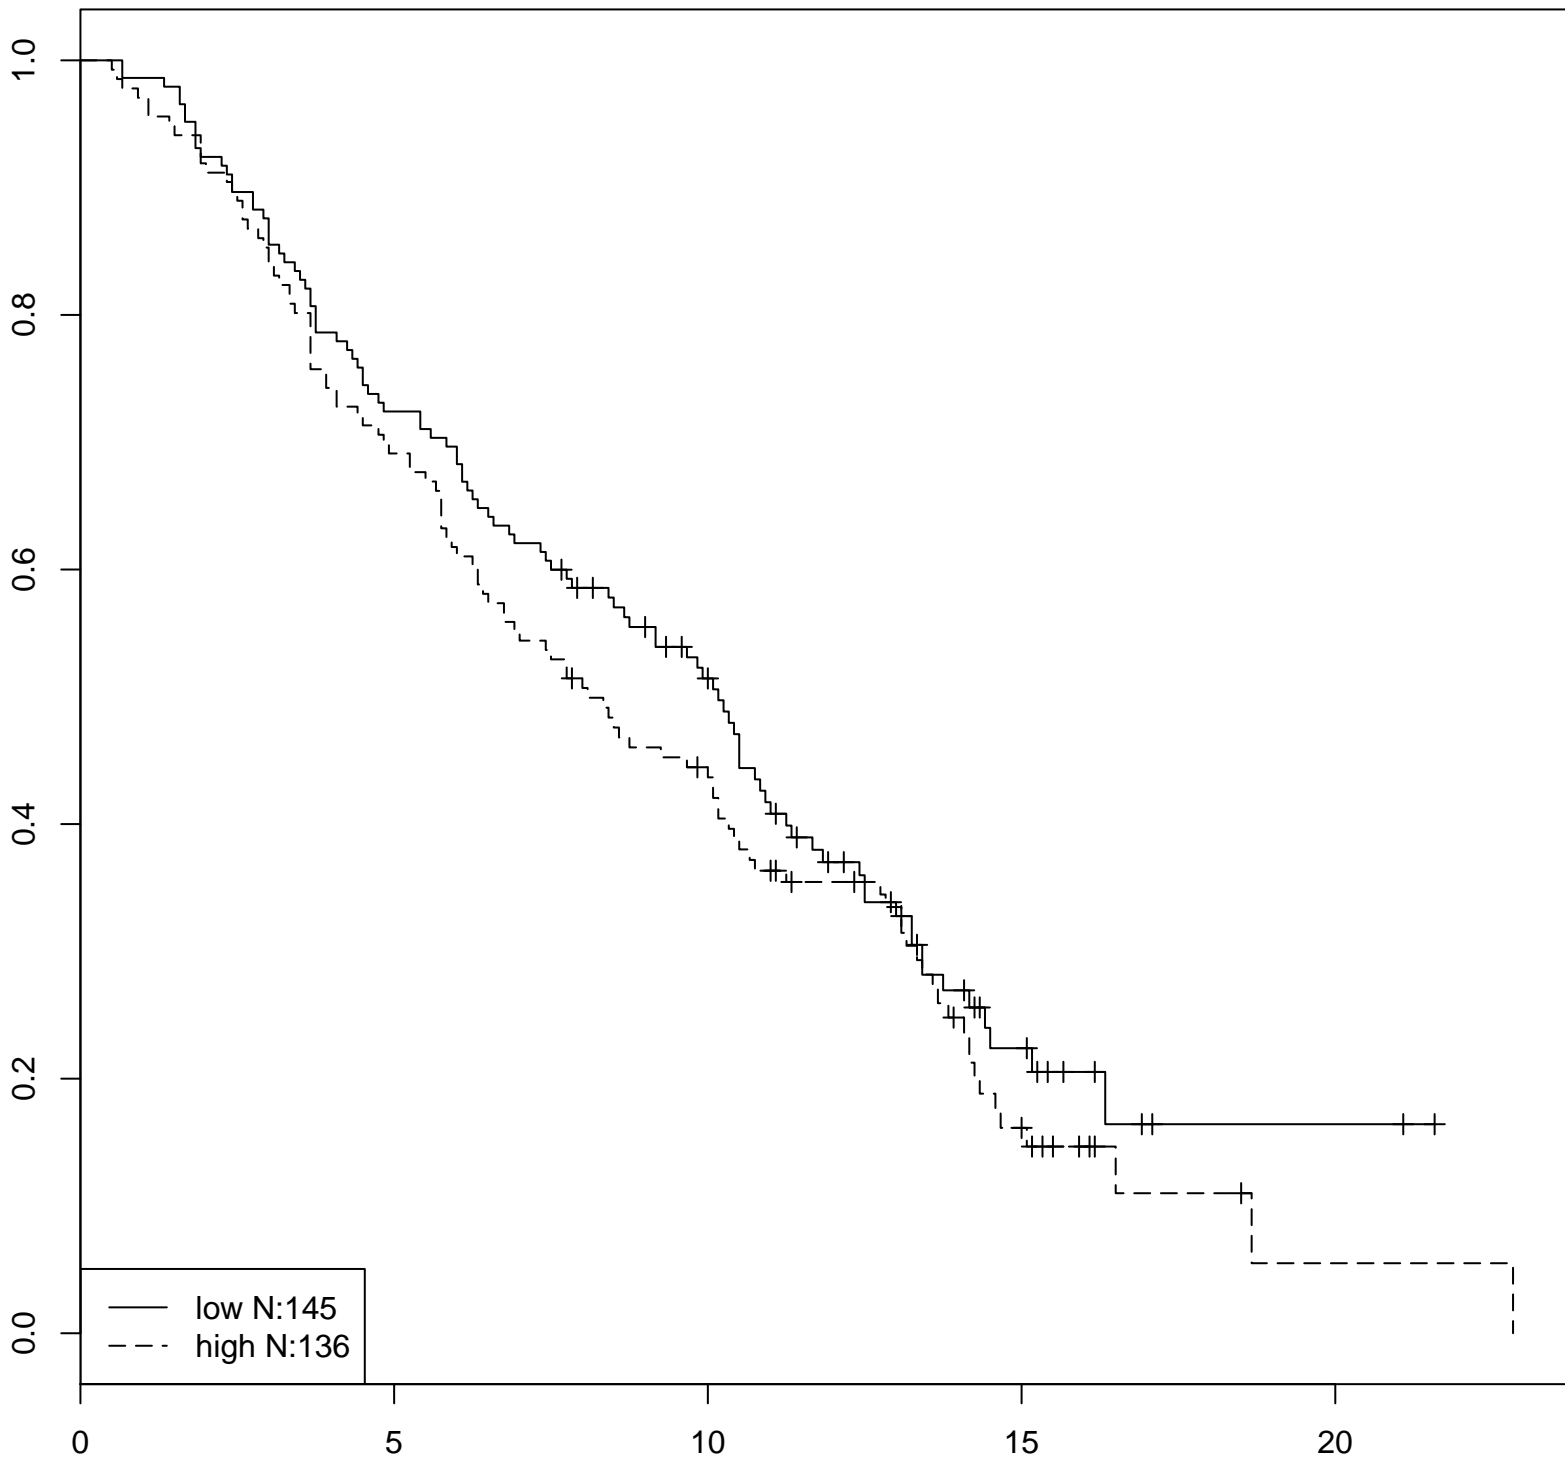

# Survival by BRCA2 expression

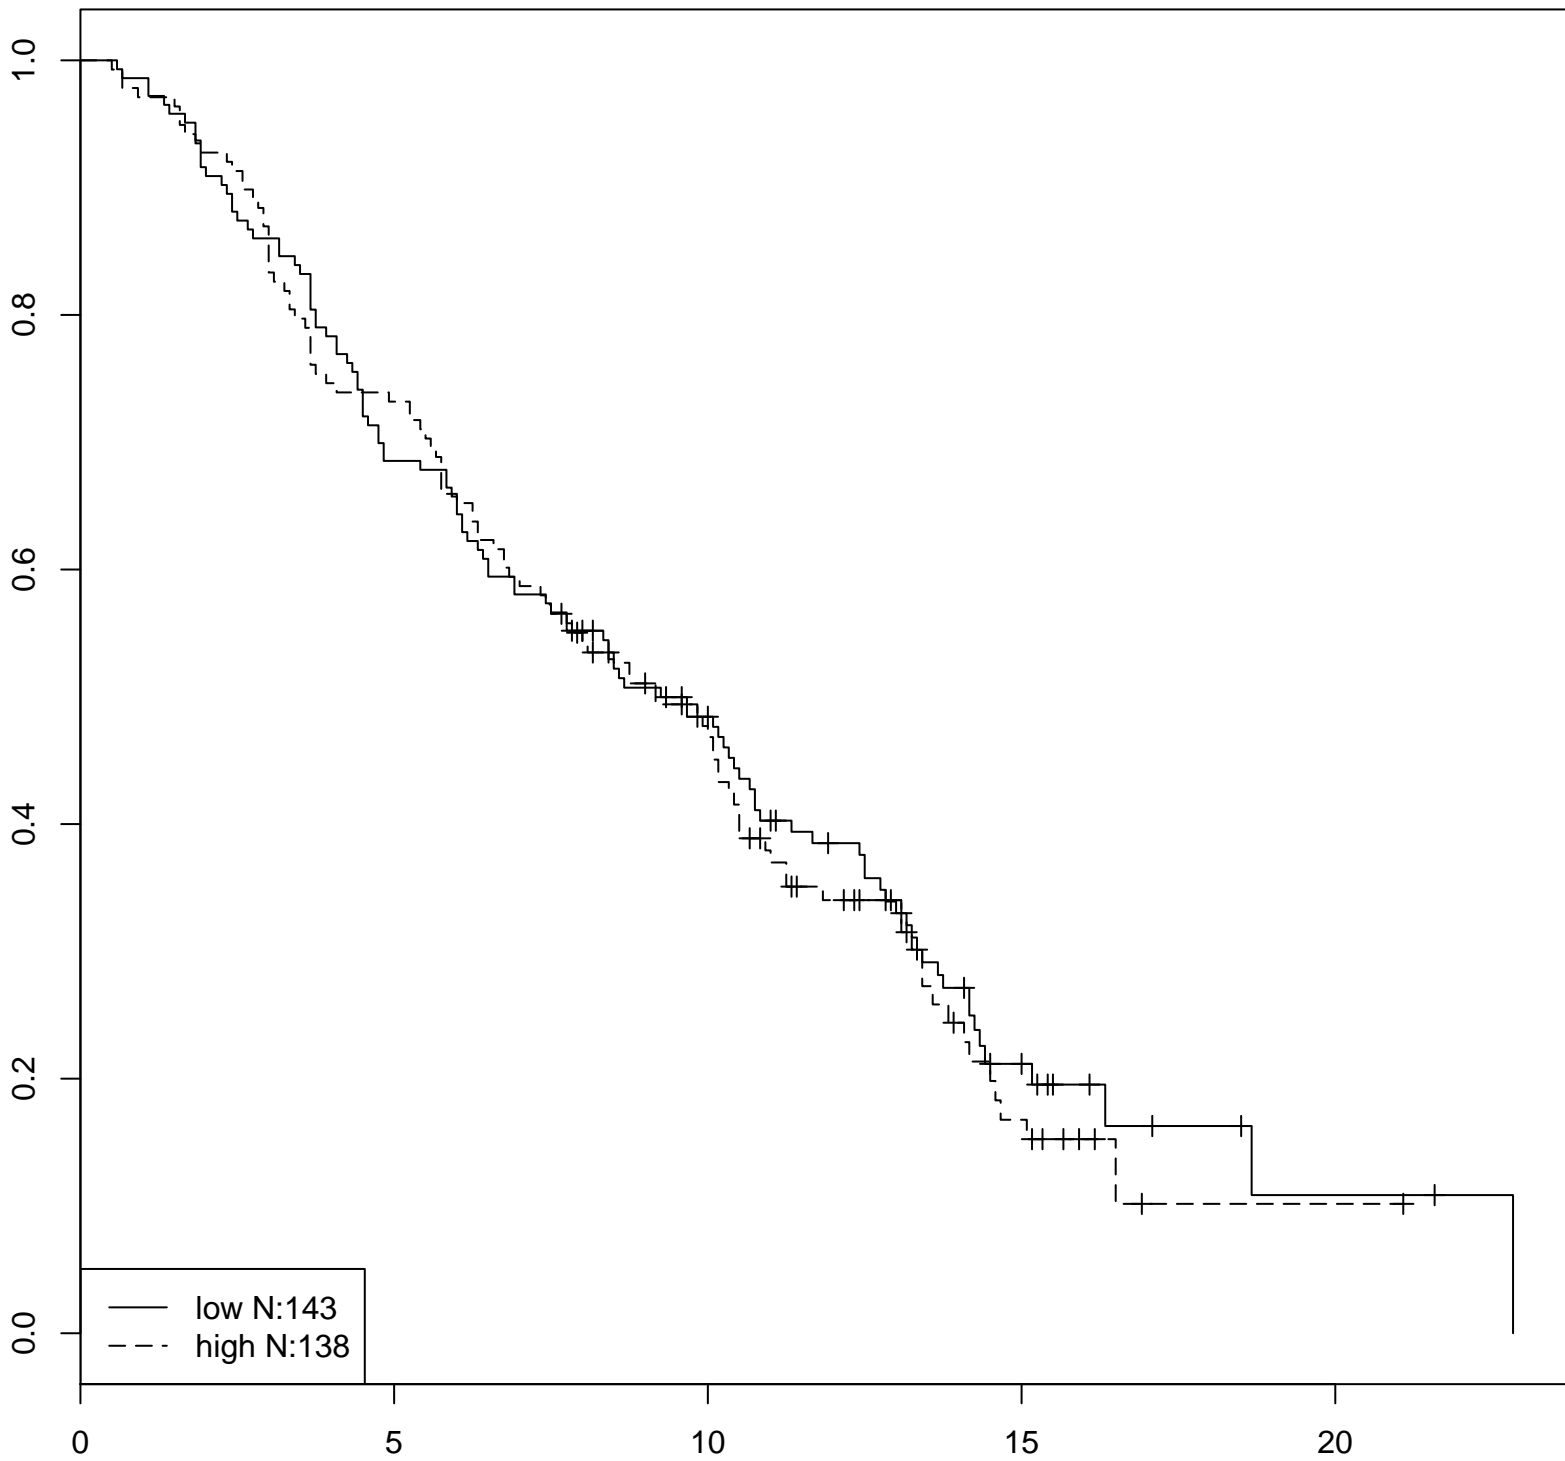

years

log-rank test p-value = 0.648

# Survival by BSG expression

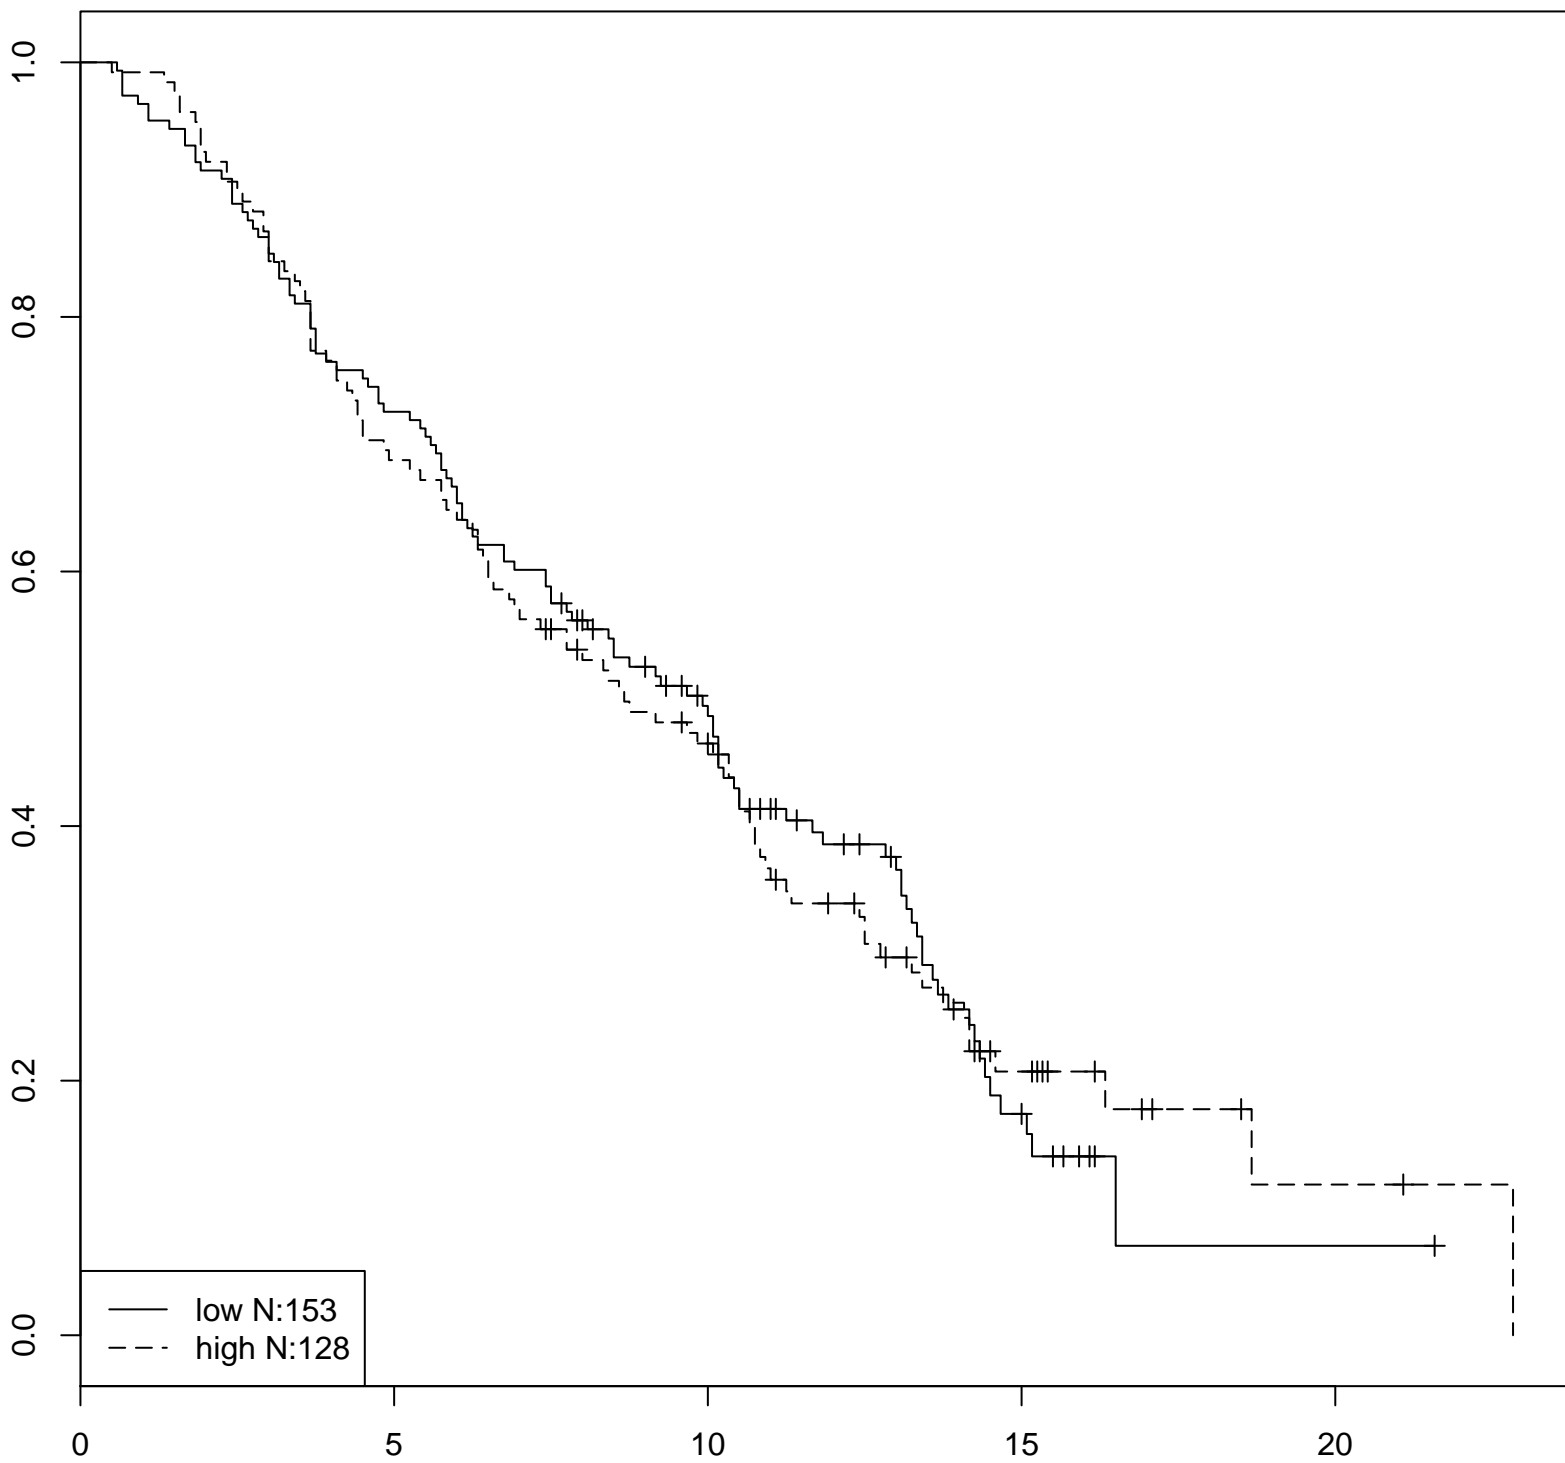

years

log-rank test p-value = 0.998

# Survival by BUB1B expression

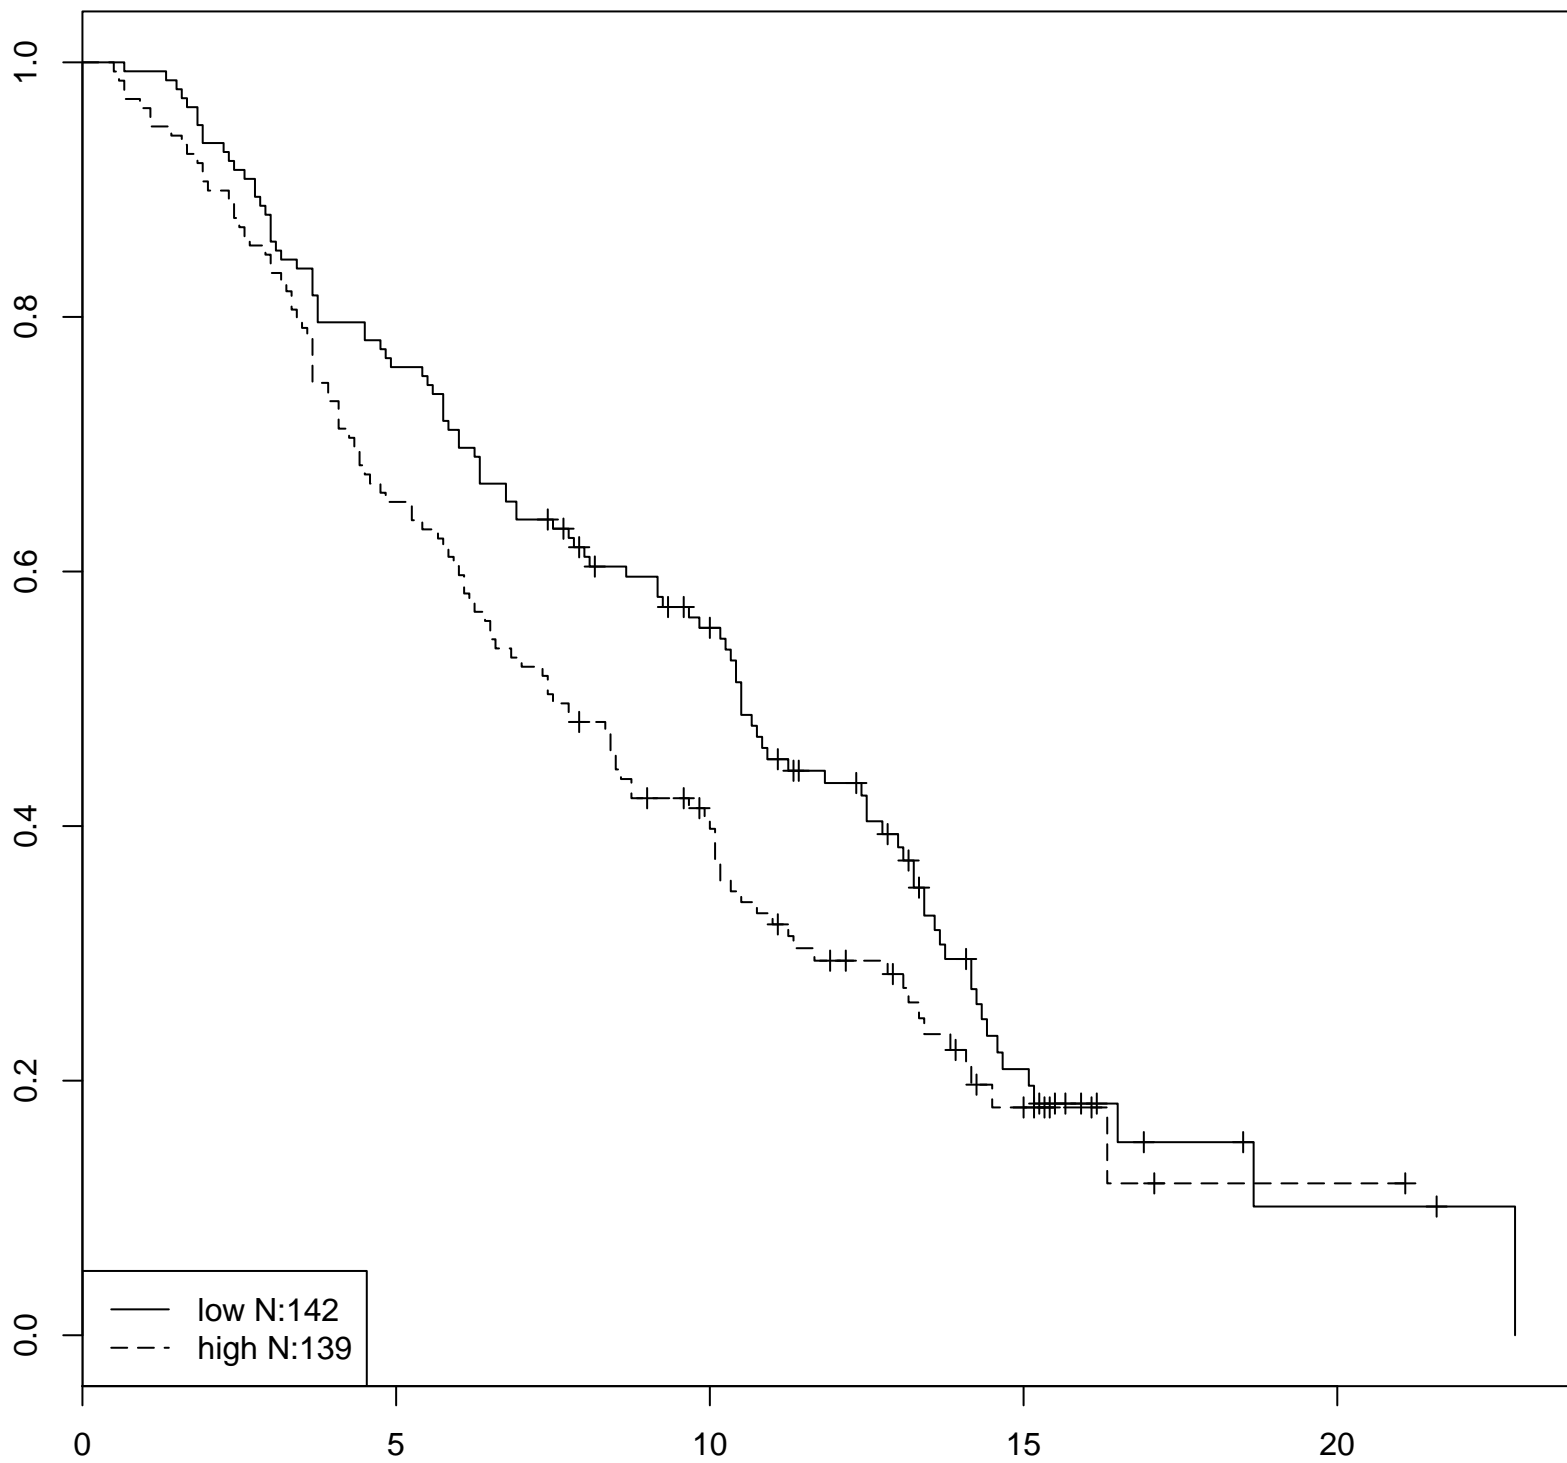

years

log-rank test p-value = 0.045

# Survival by CAMK2N1 expression

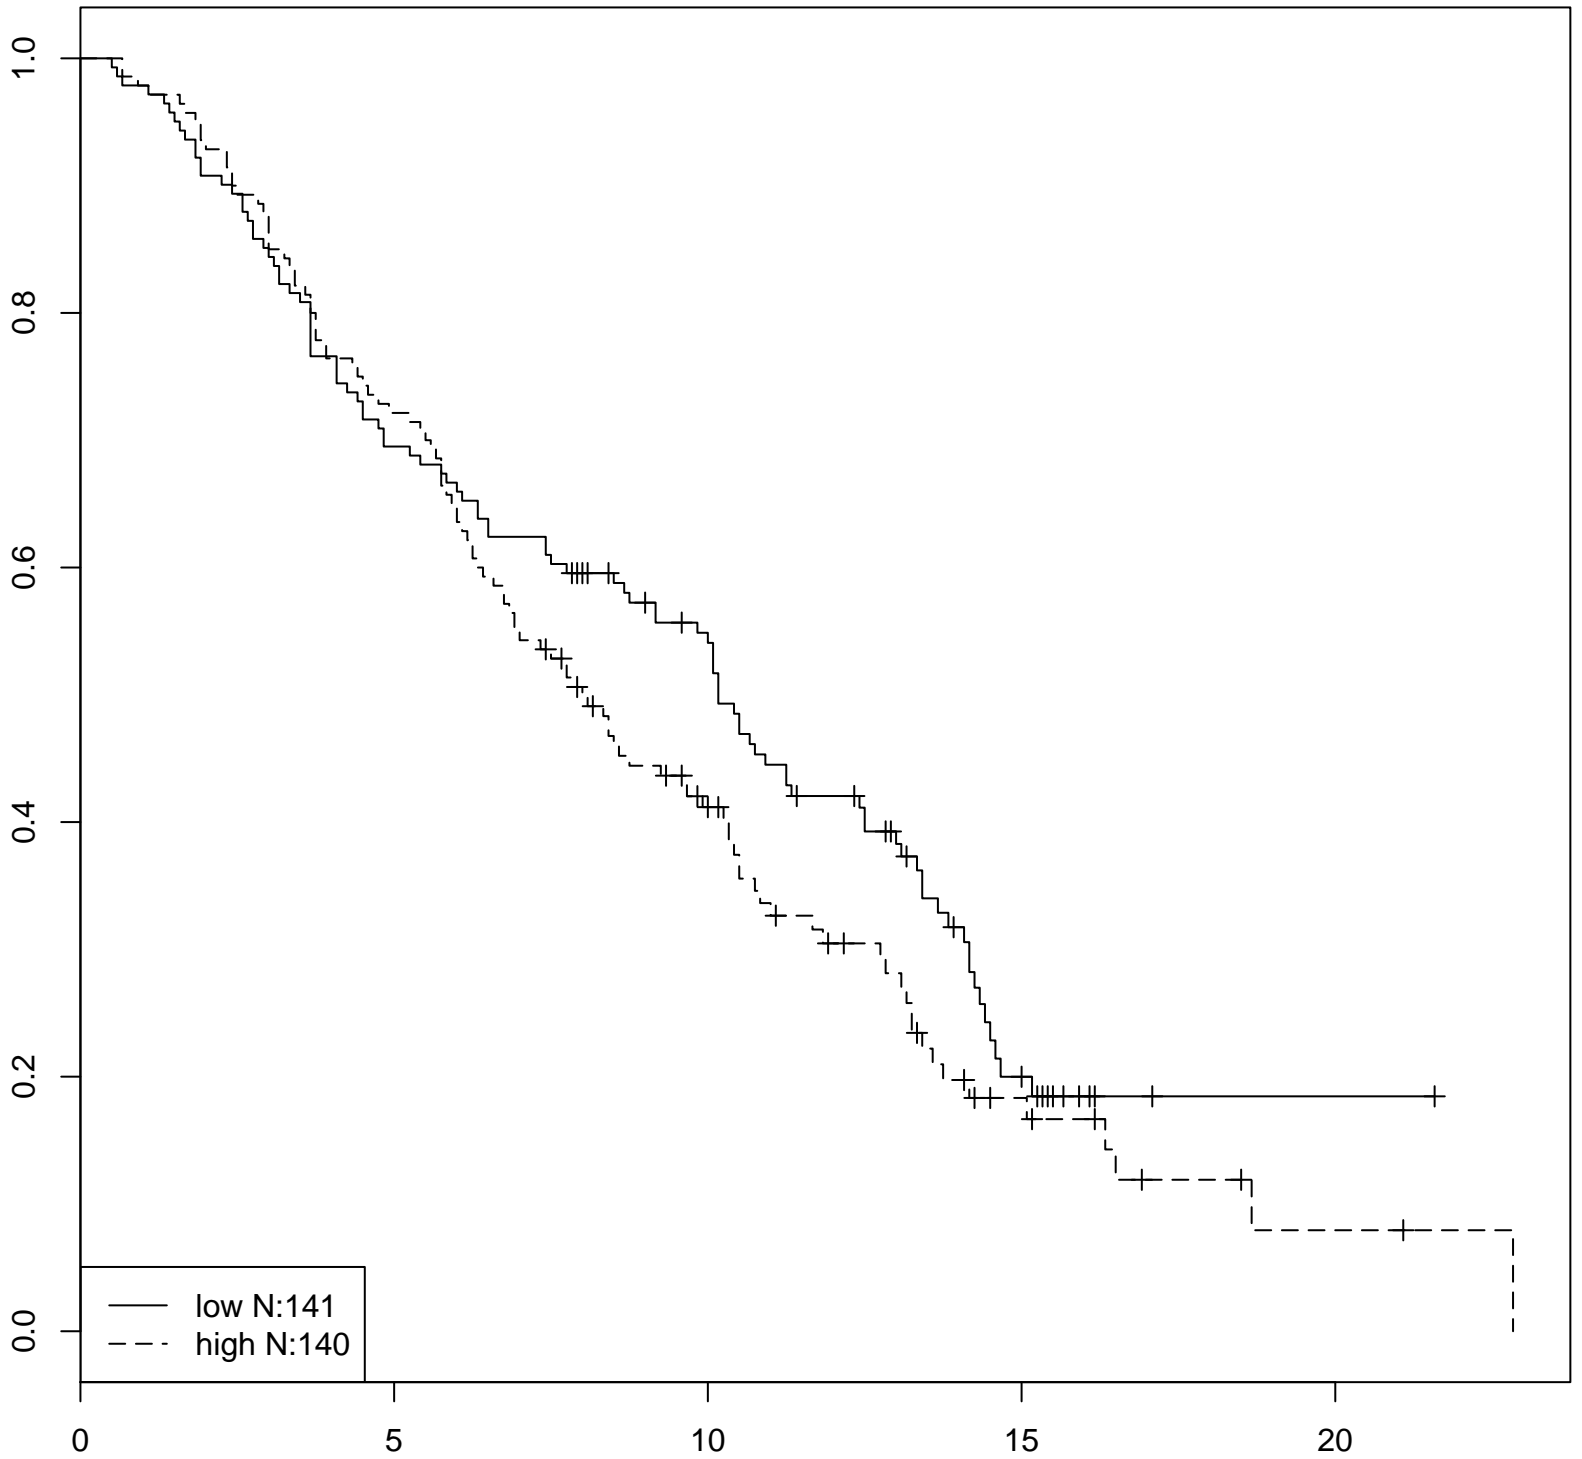

years

log-rank test p-value = 0.124

# Survival by CAV1 expression

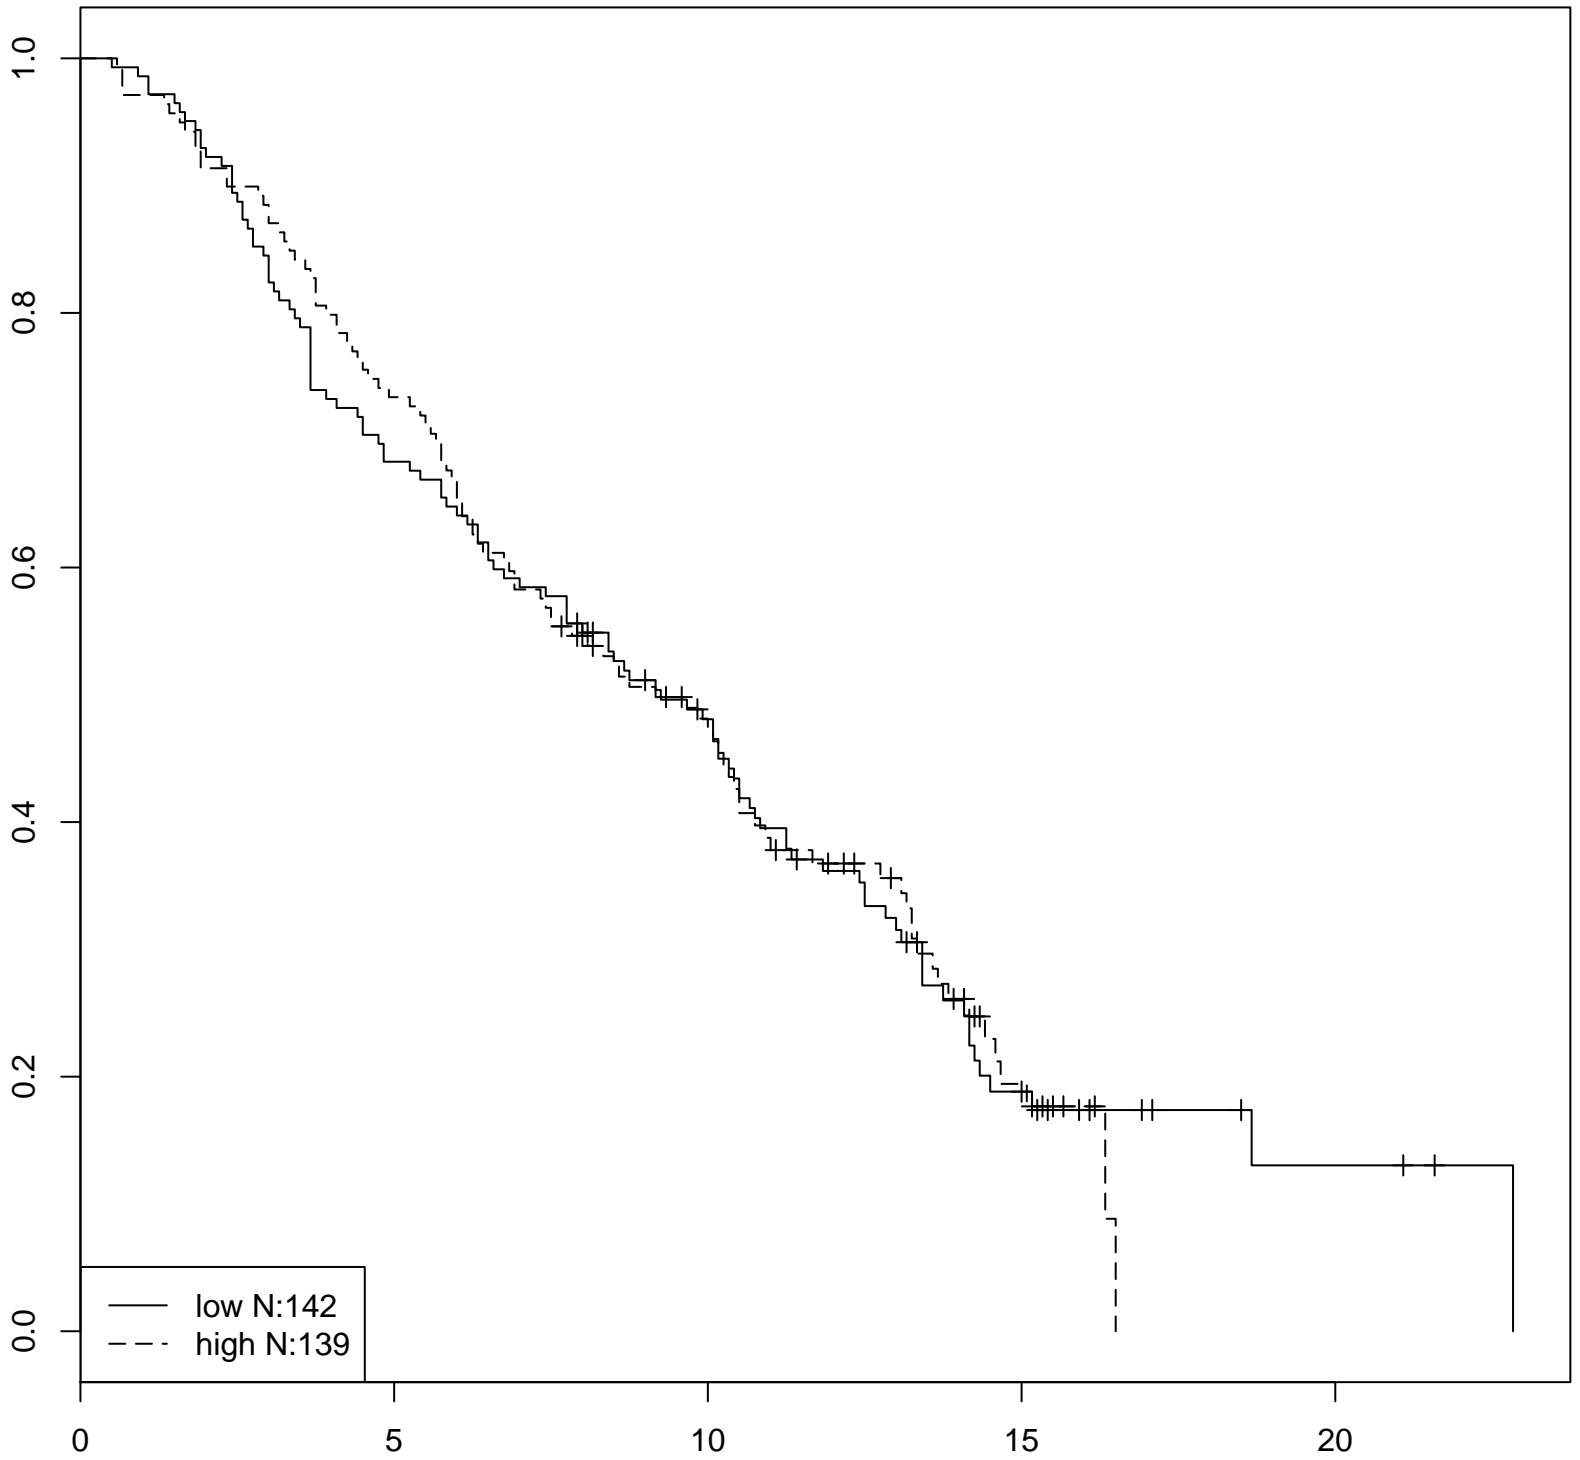

years

log-rank test p-value = 0.997

# Survival by CBL expression

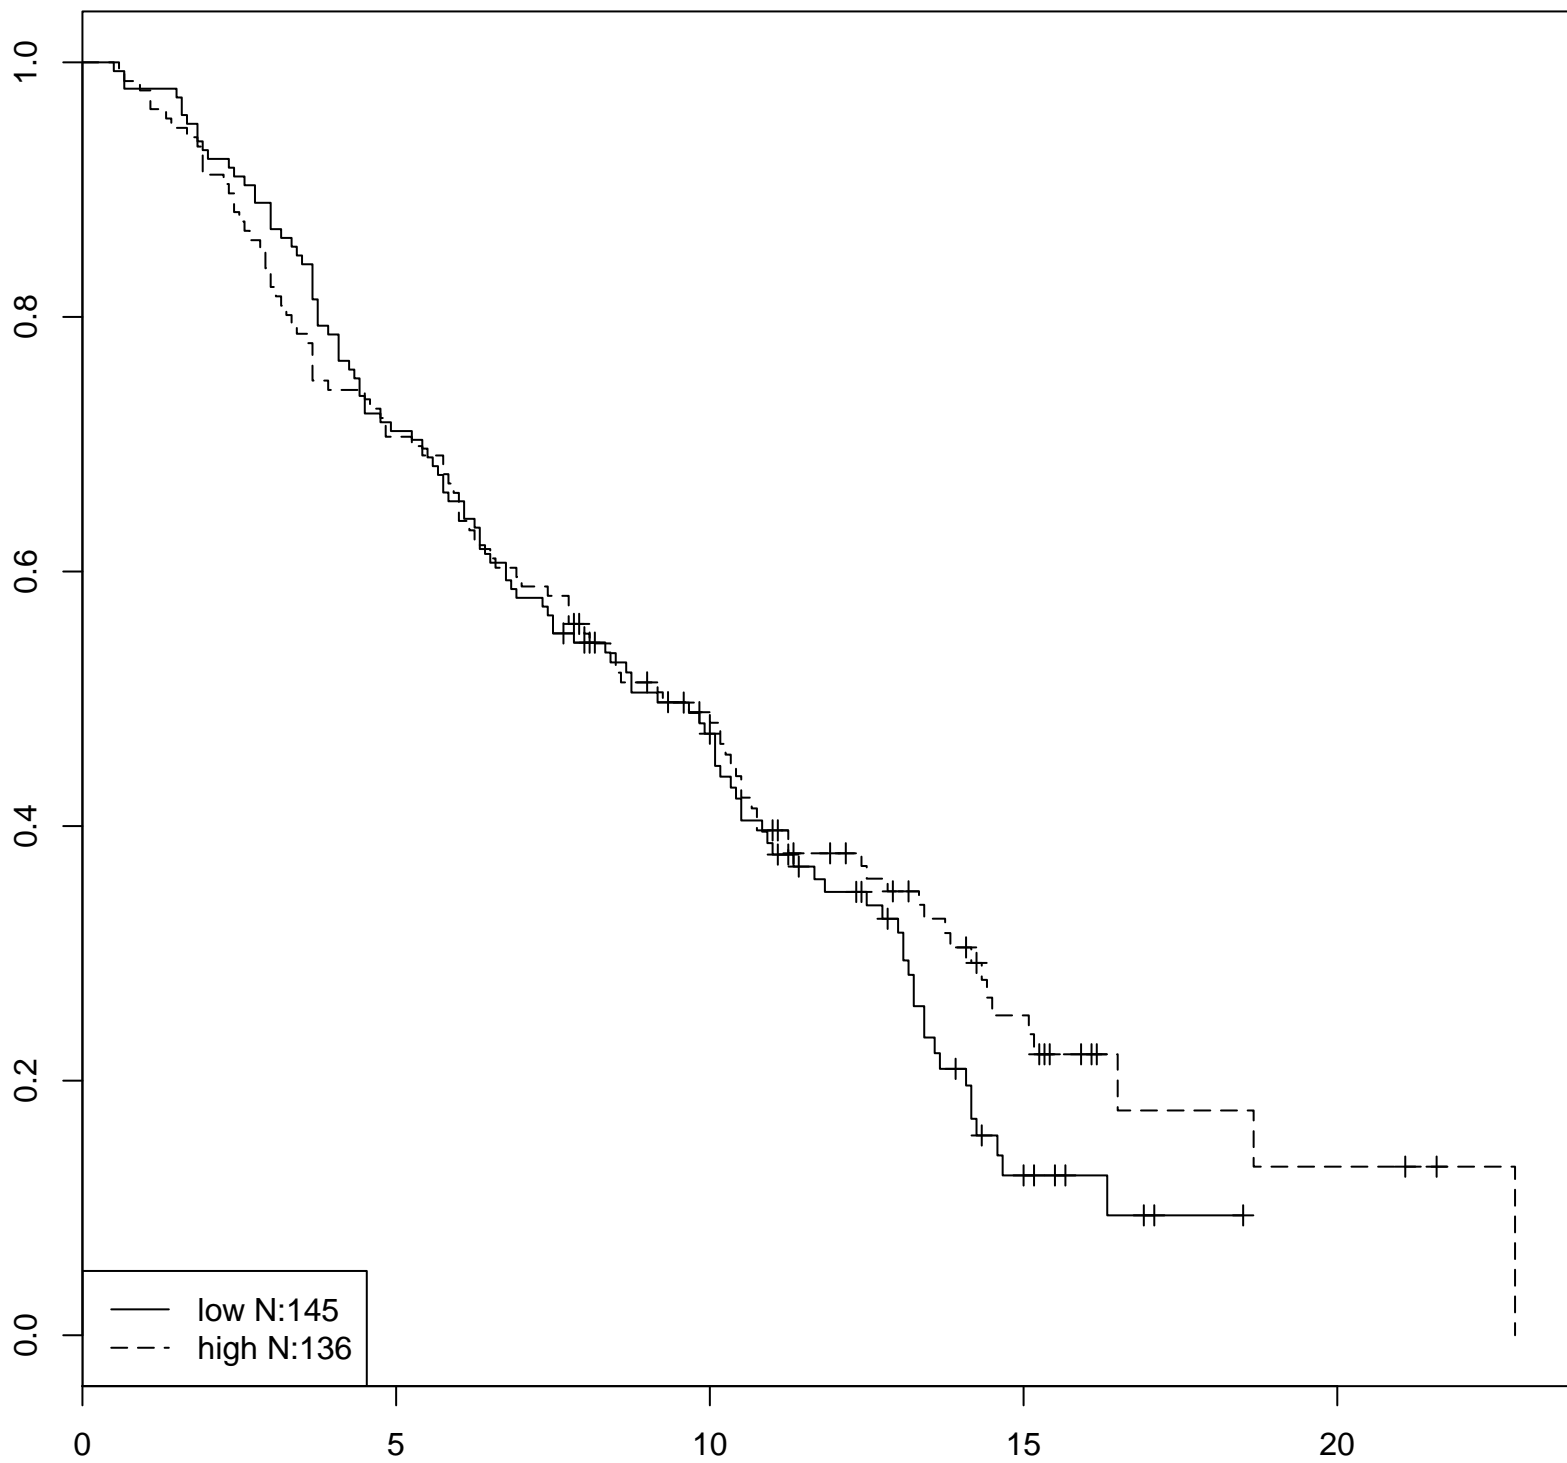

years

log-rank test p-value = 0.303

# Survival by CCNA1 expression

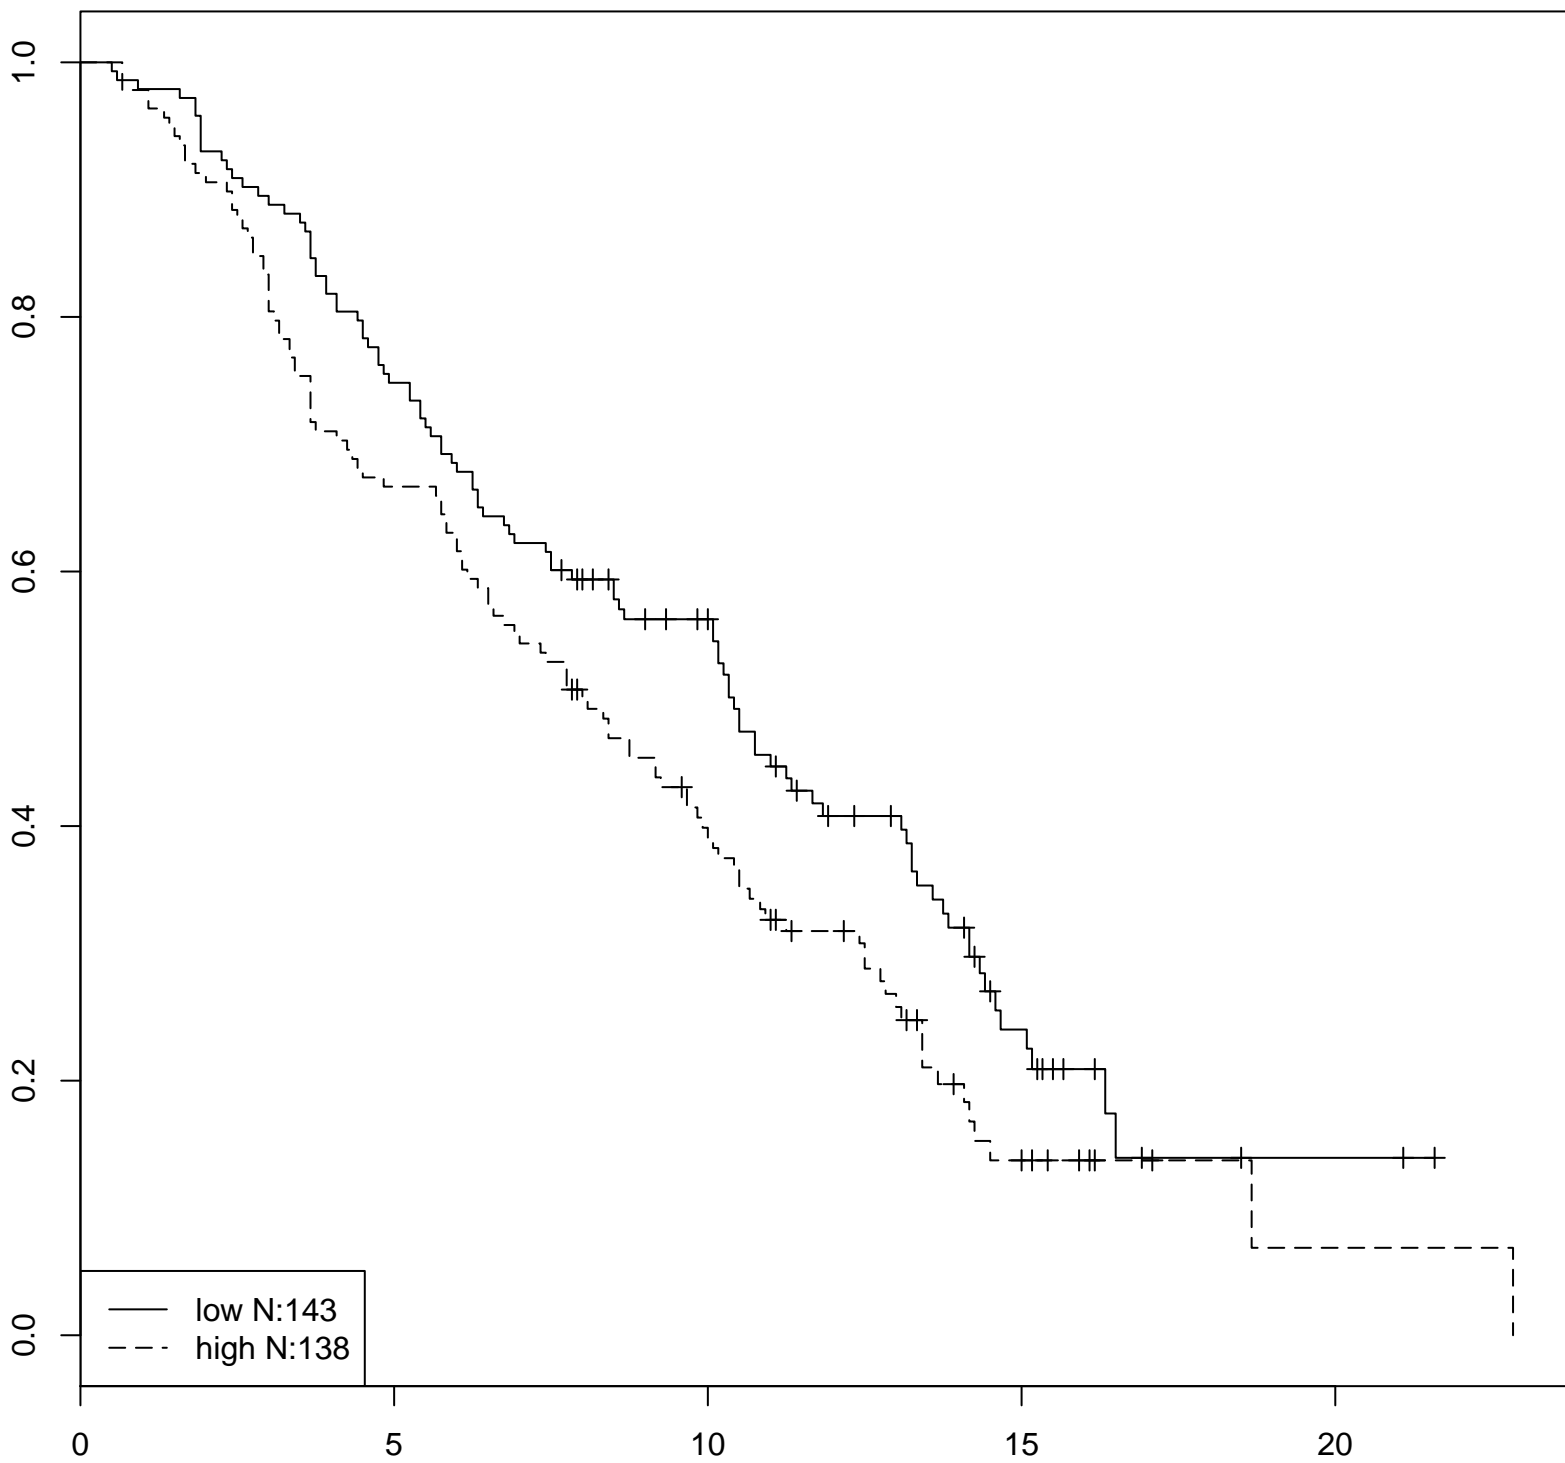

years

log-rank test p-value = 0.02



# Survival by CCND2 expression

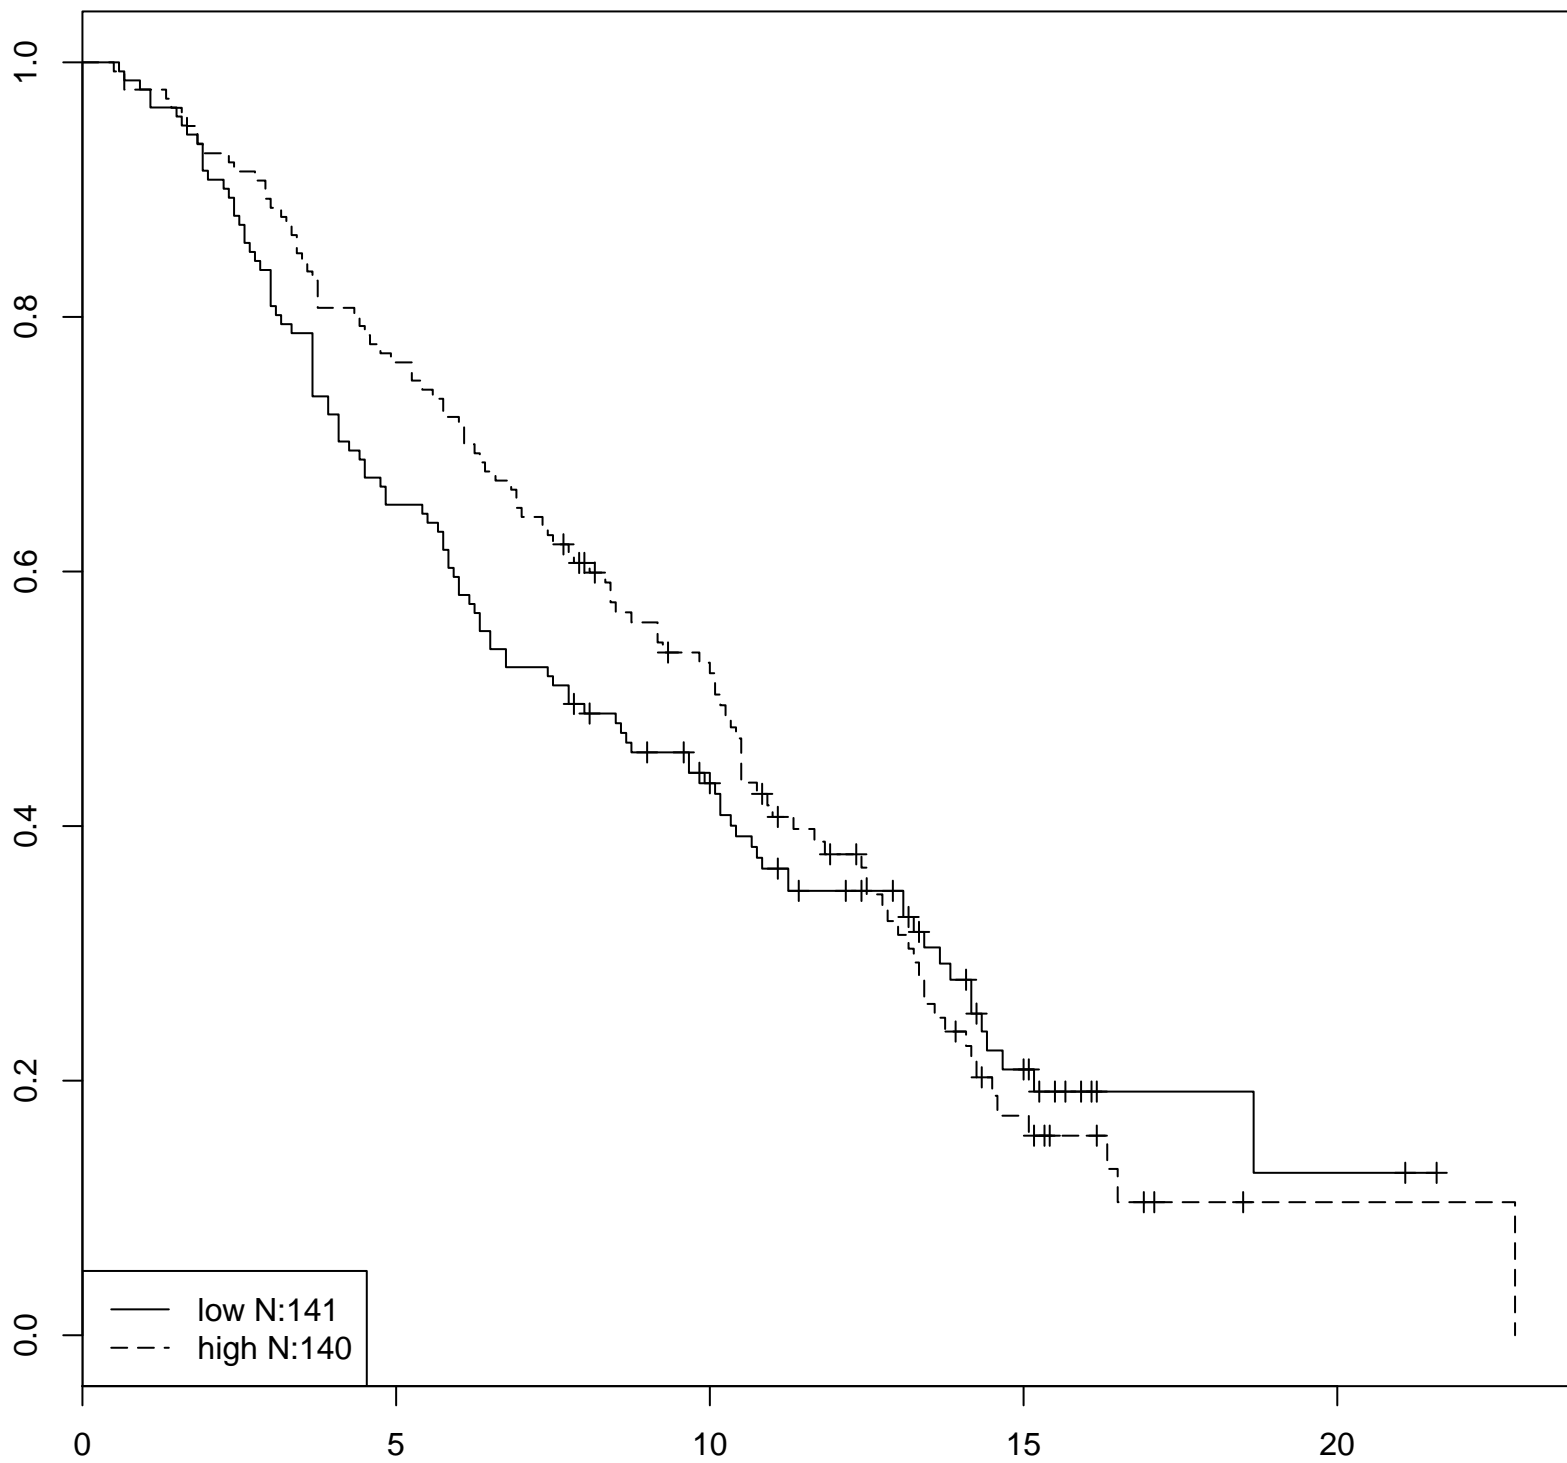

# Survival by CCNG2 expression

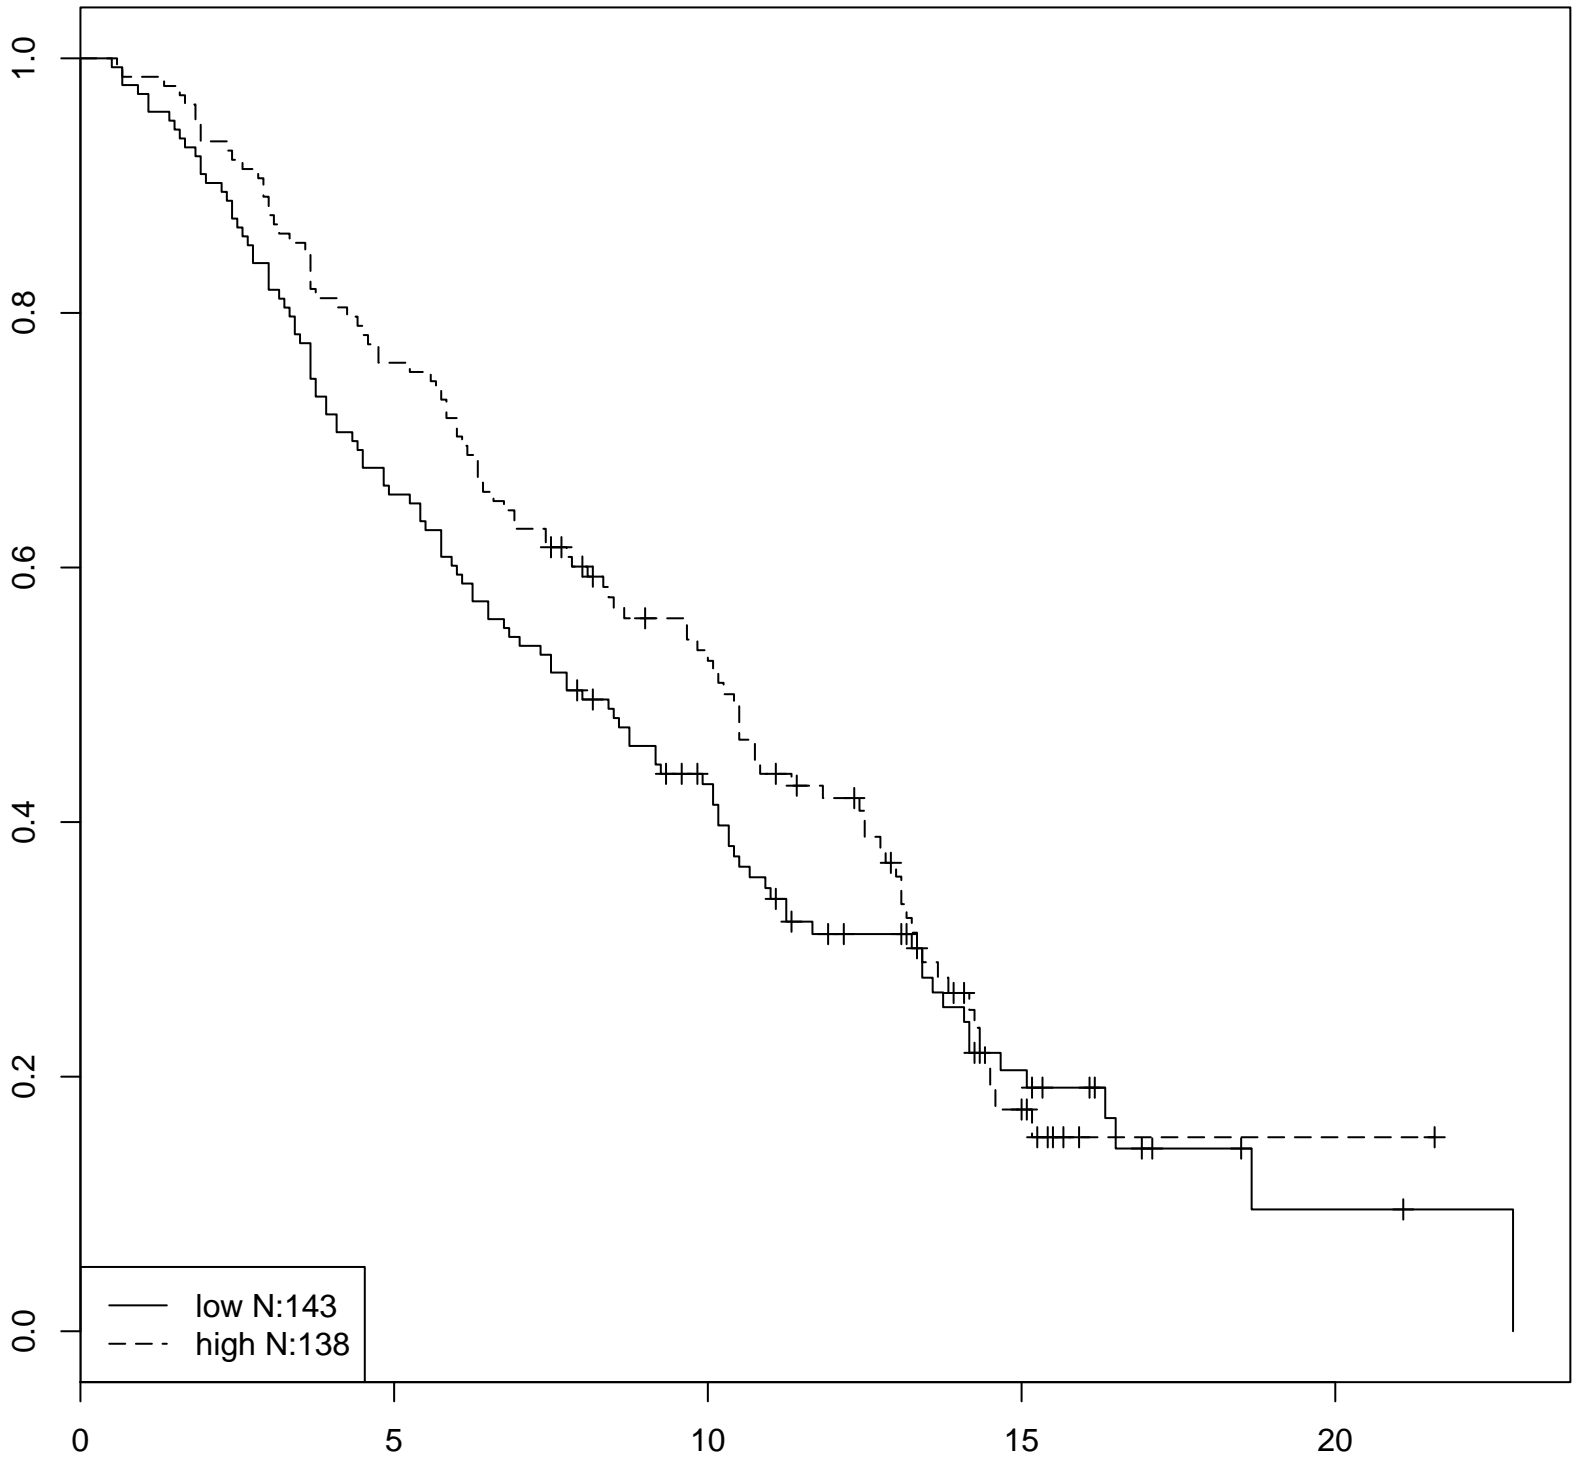

# Survival by CCR6 expression

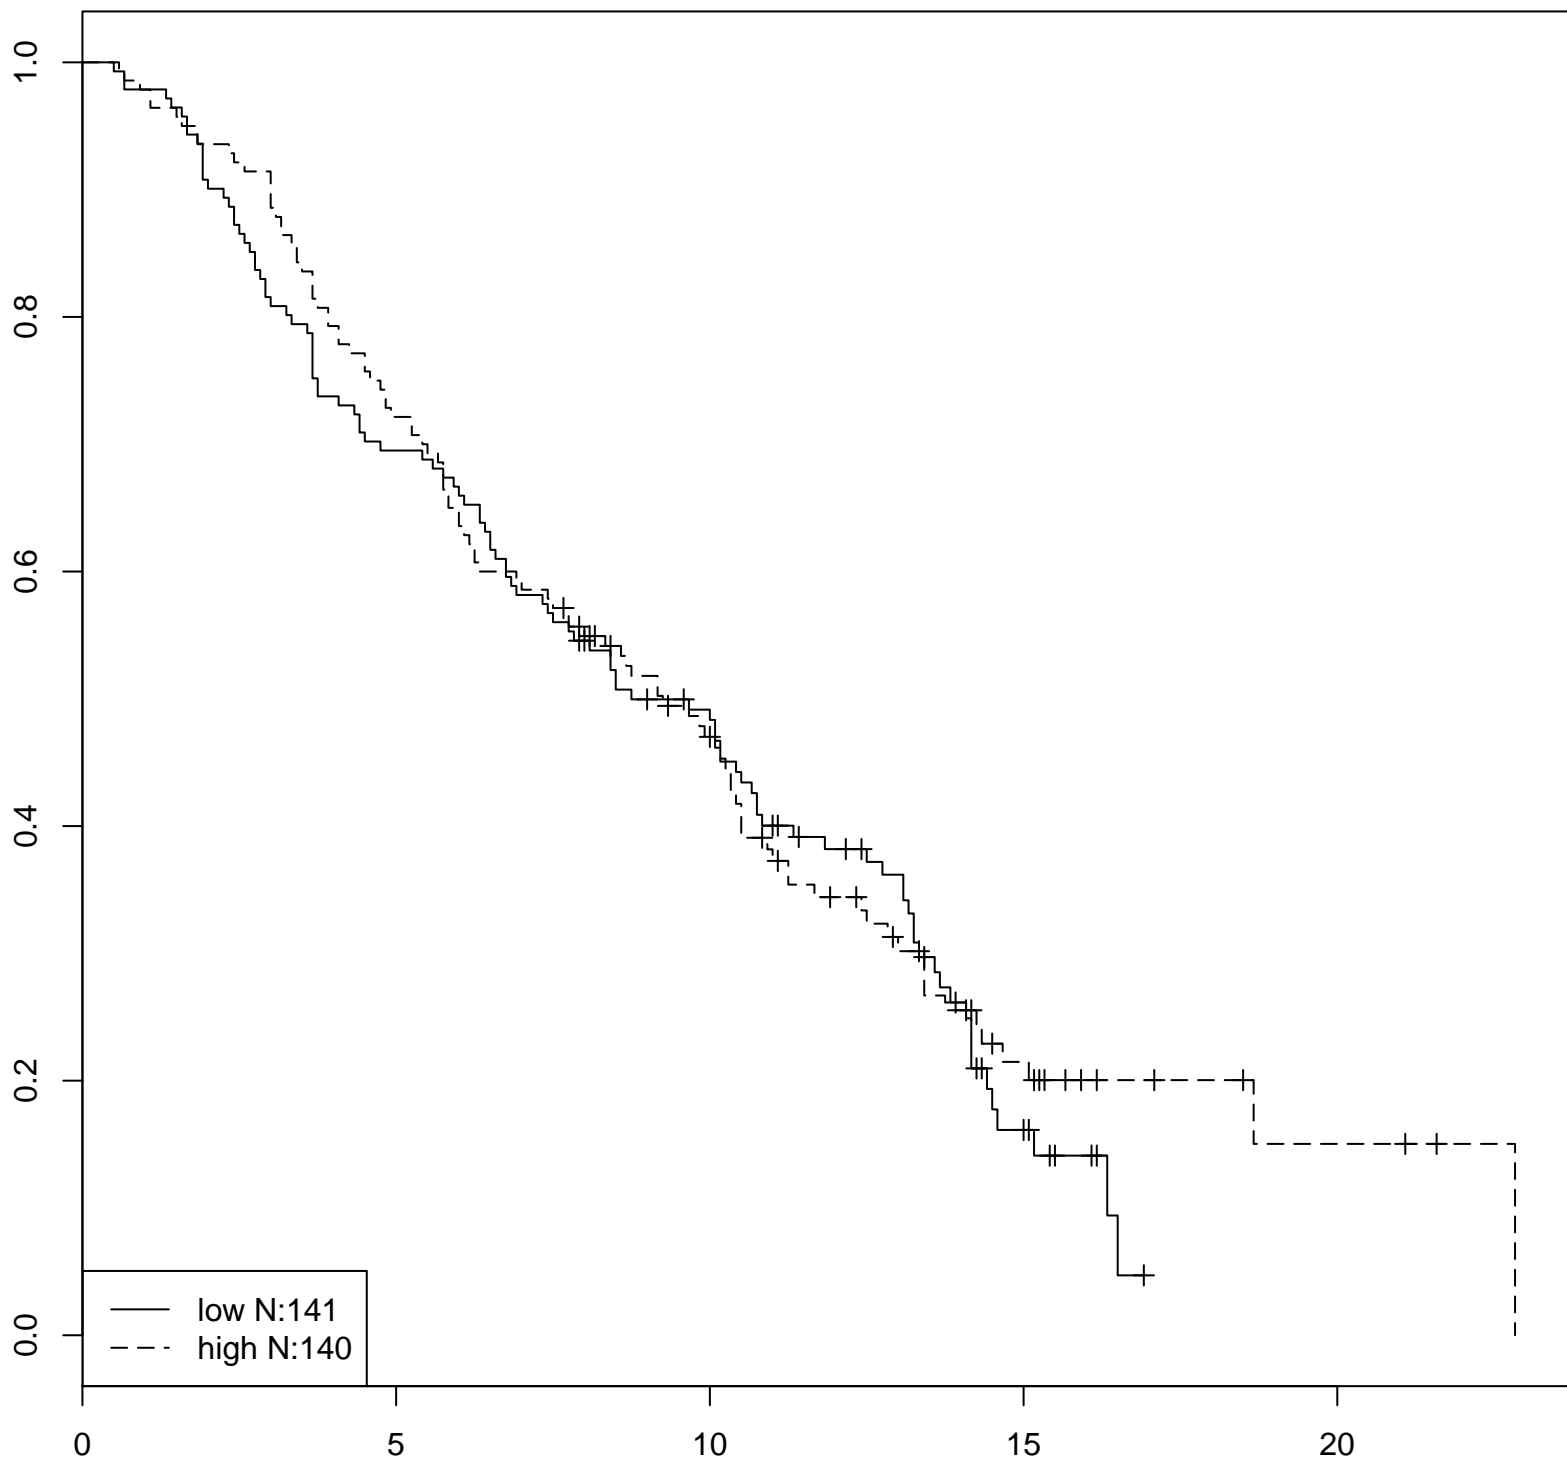

years

log-rank test p-value = 0.599

# Survival by CD14 expression

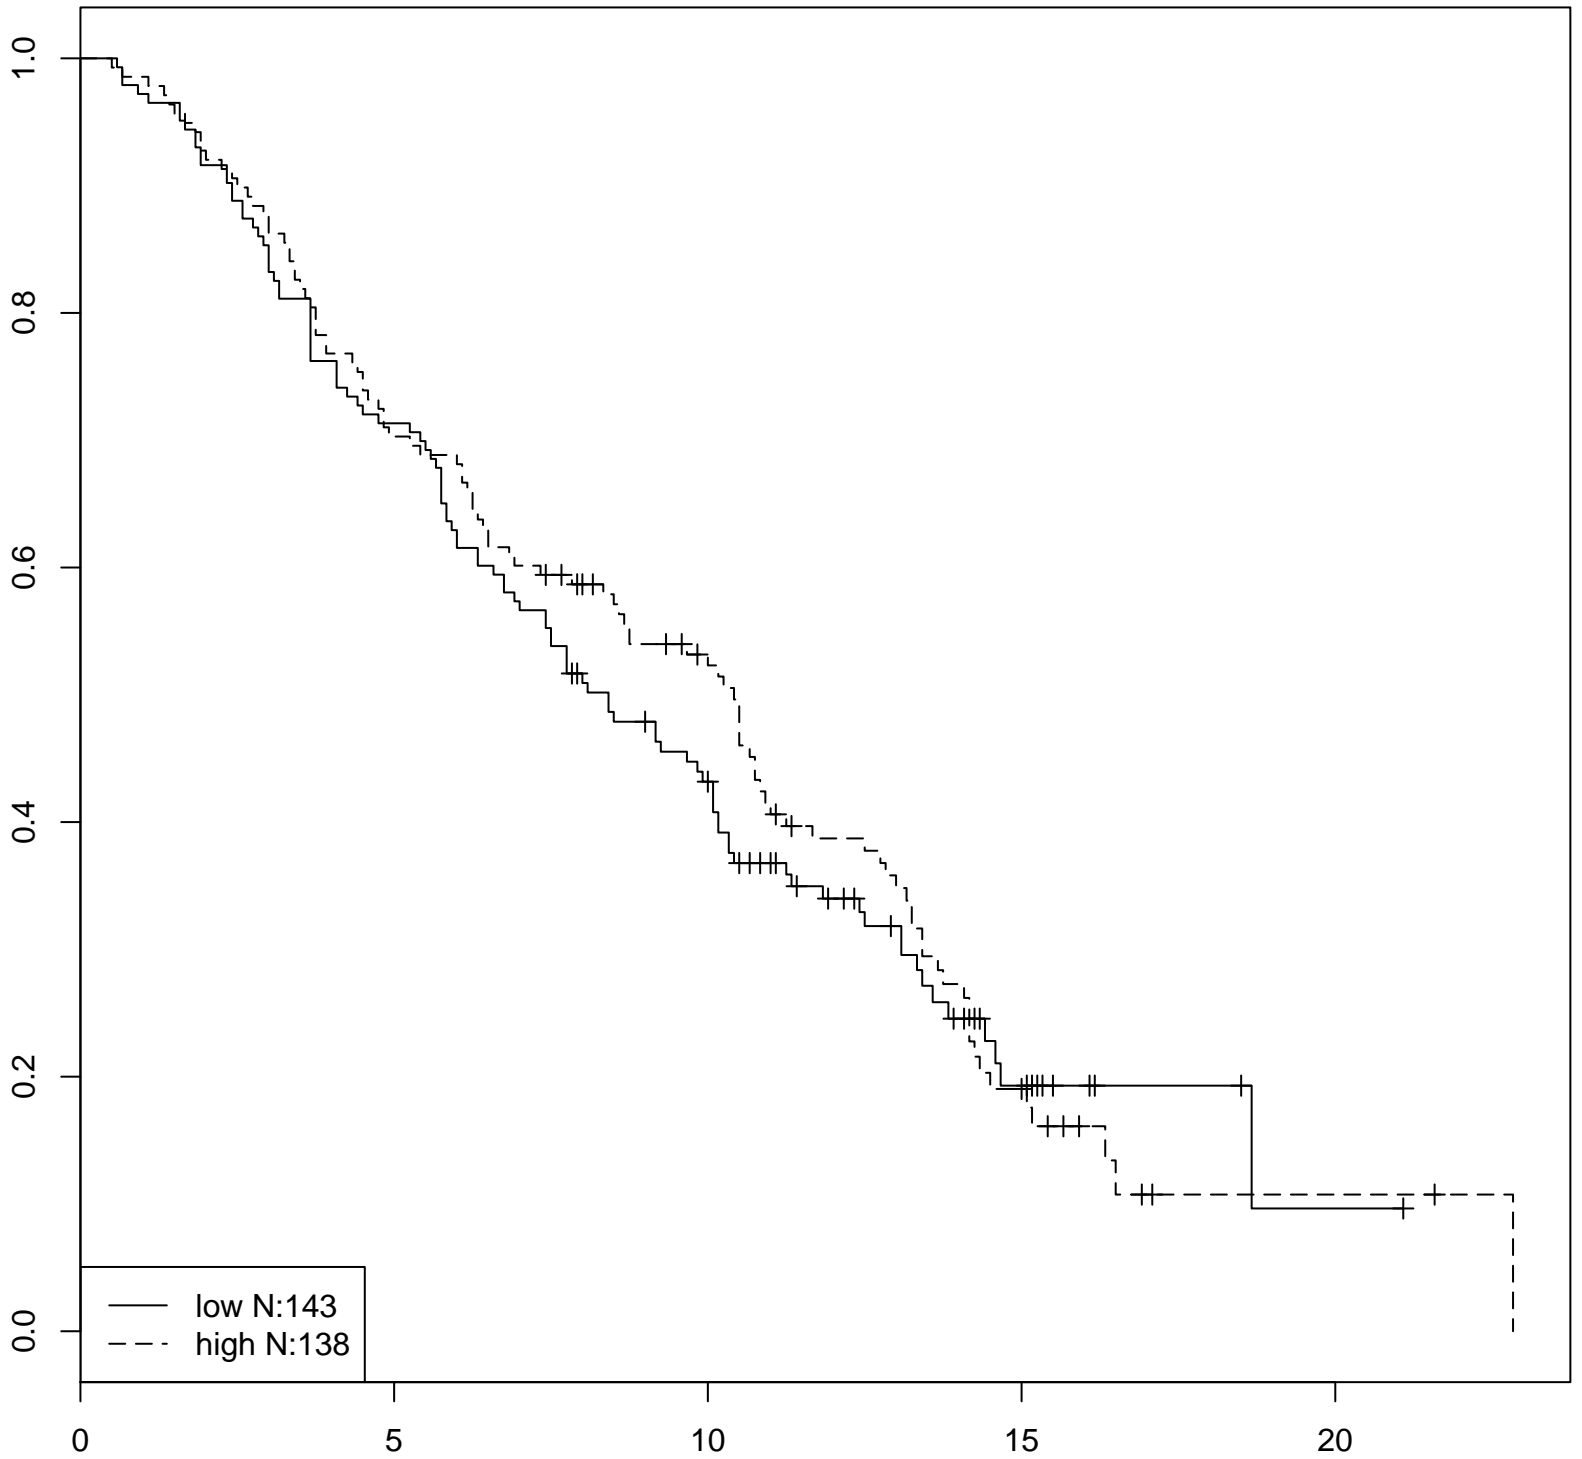

years

log-rank test p-value = 0.593

# Survival by CD151 expression

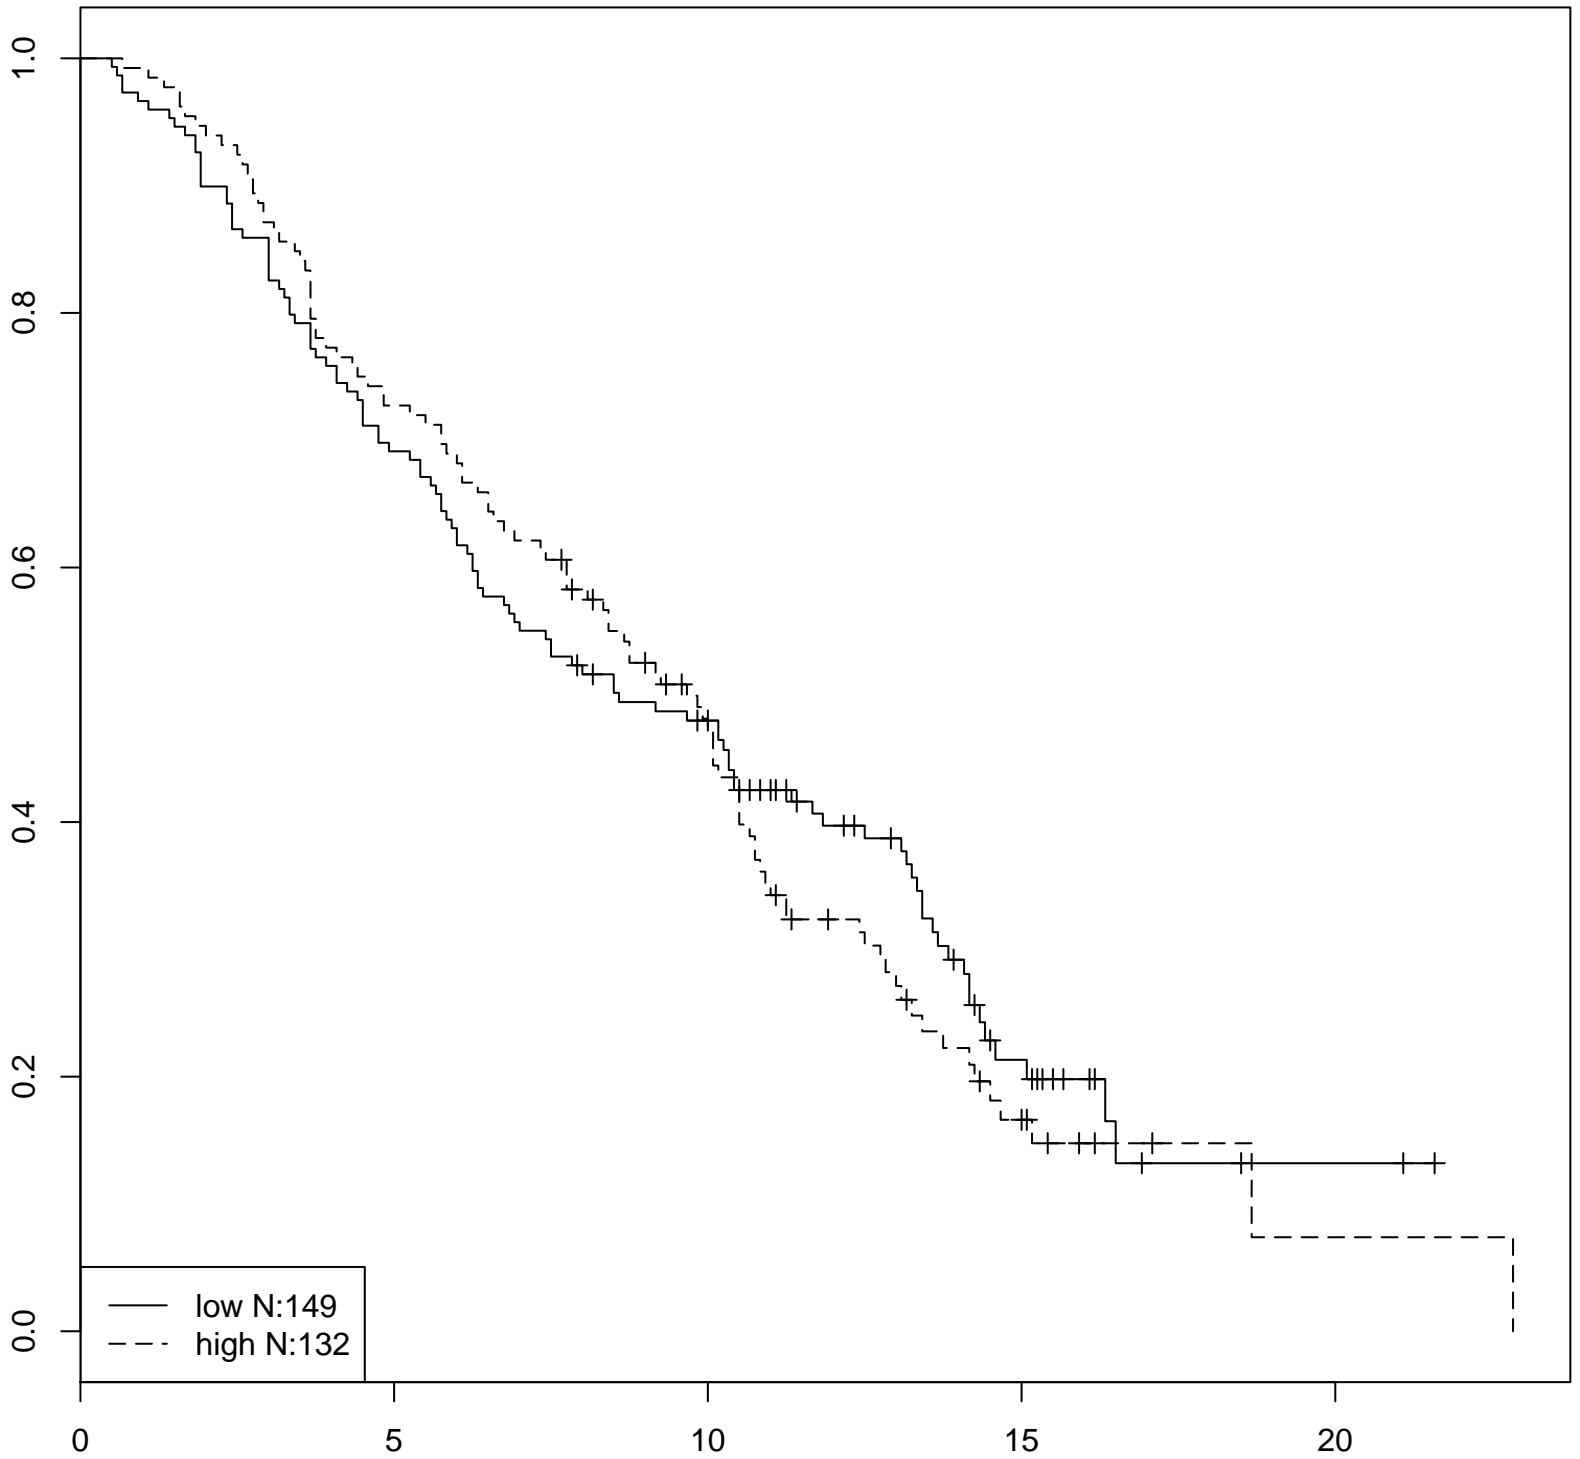

years

log-rank test p-value = 0.622

# Survival by CD24 expression

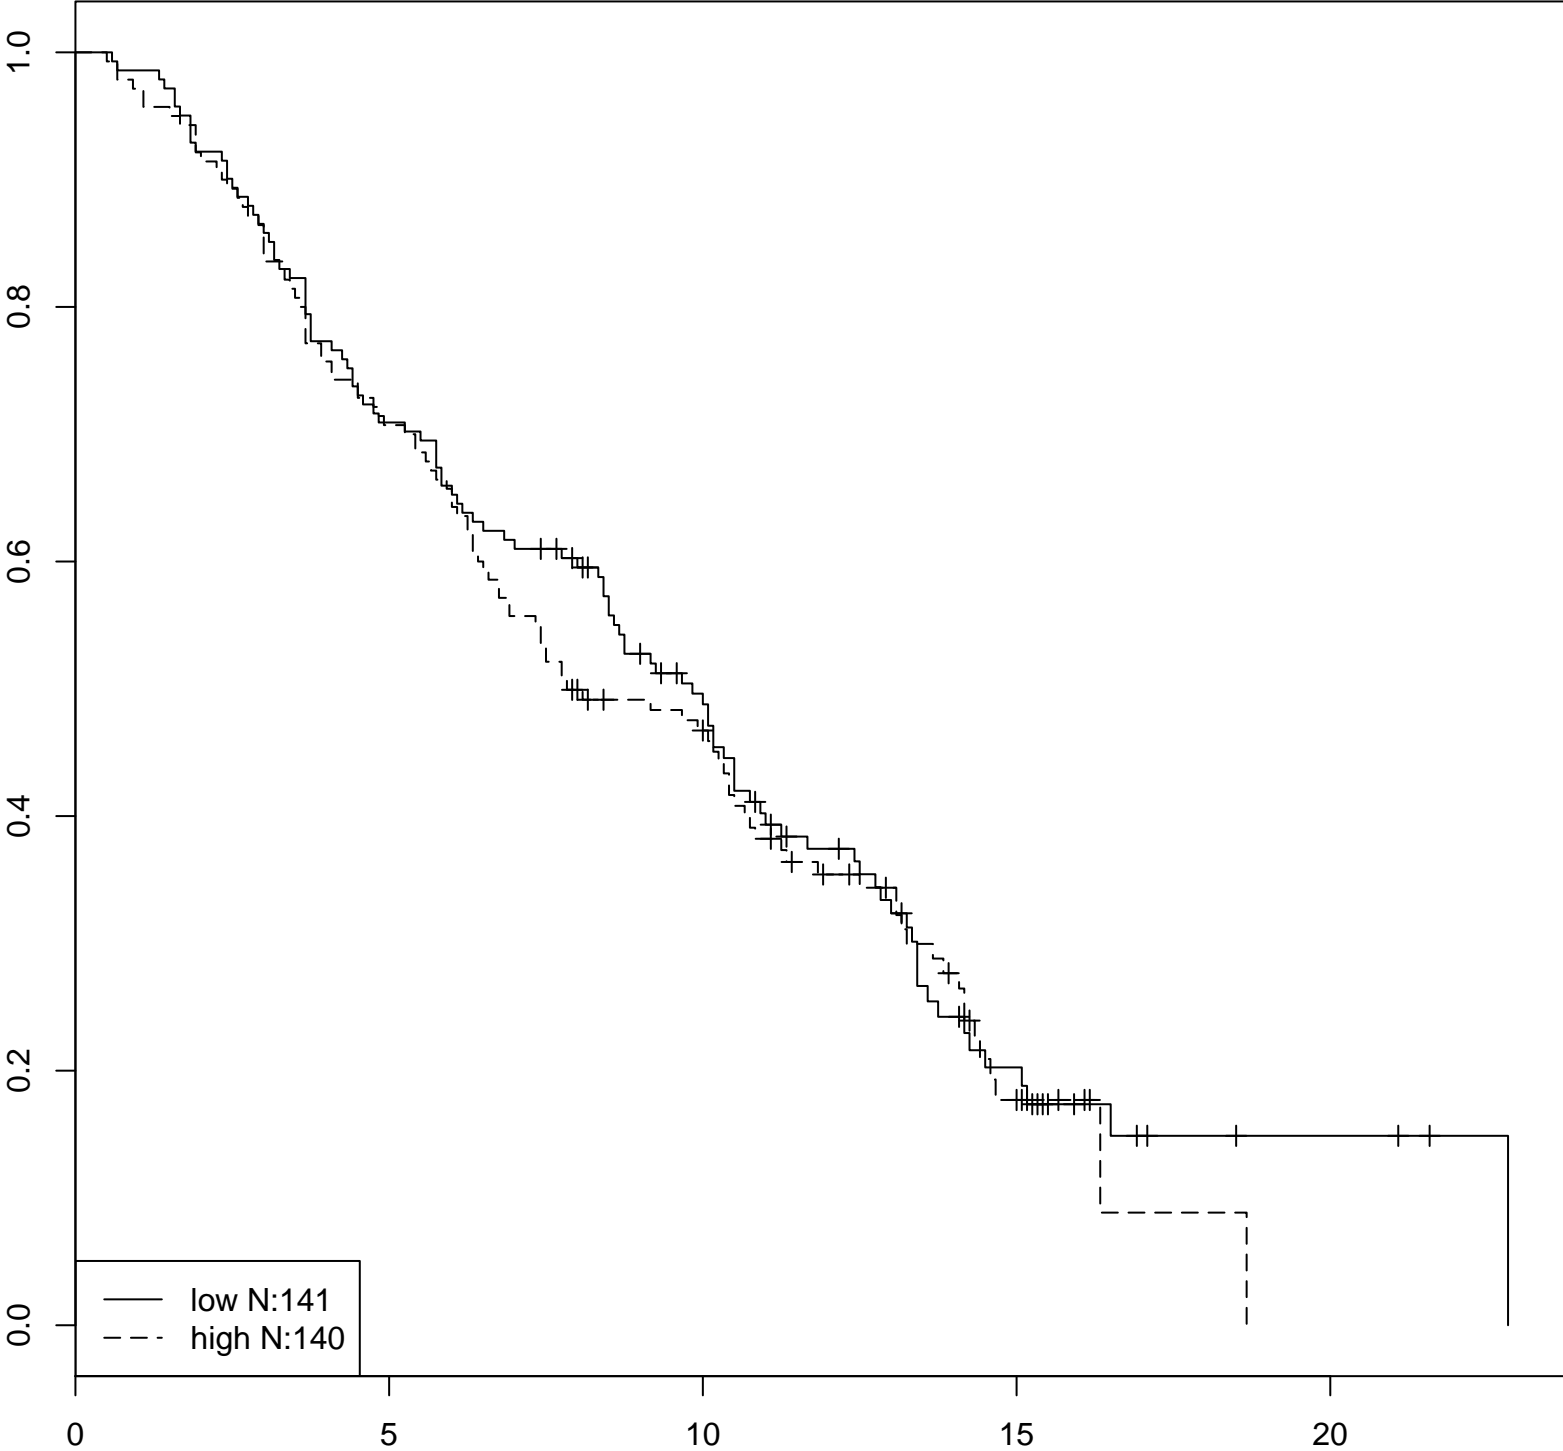

# Survival by CD34 expression

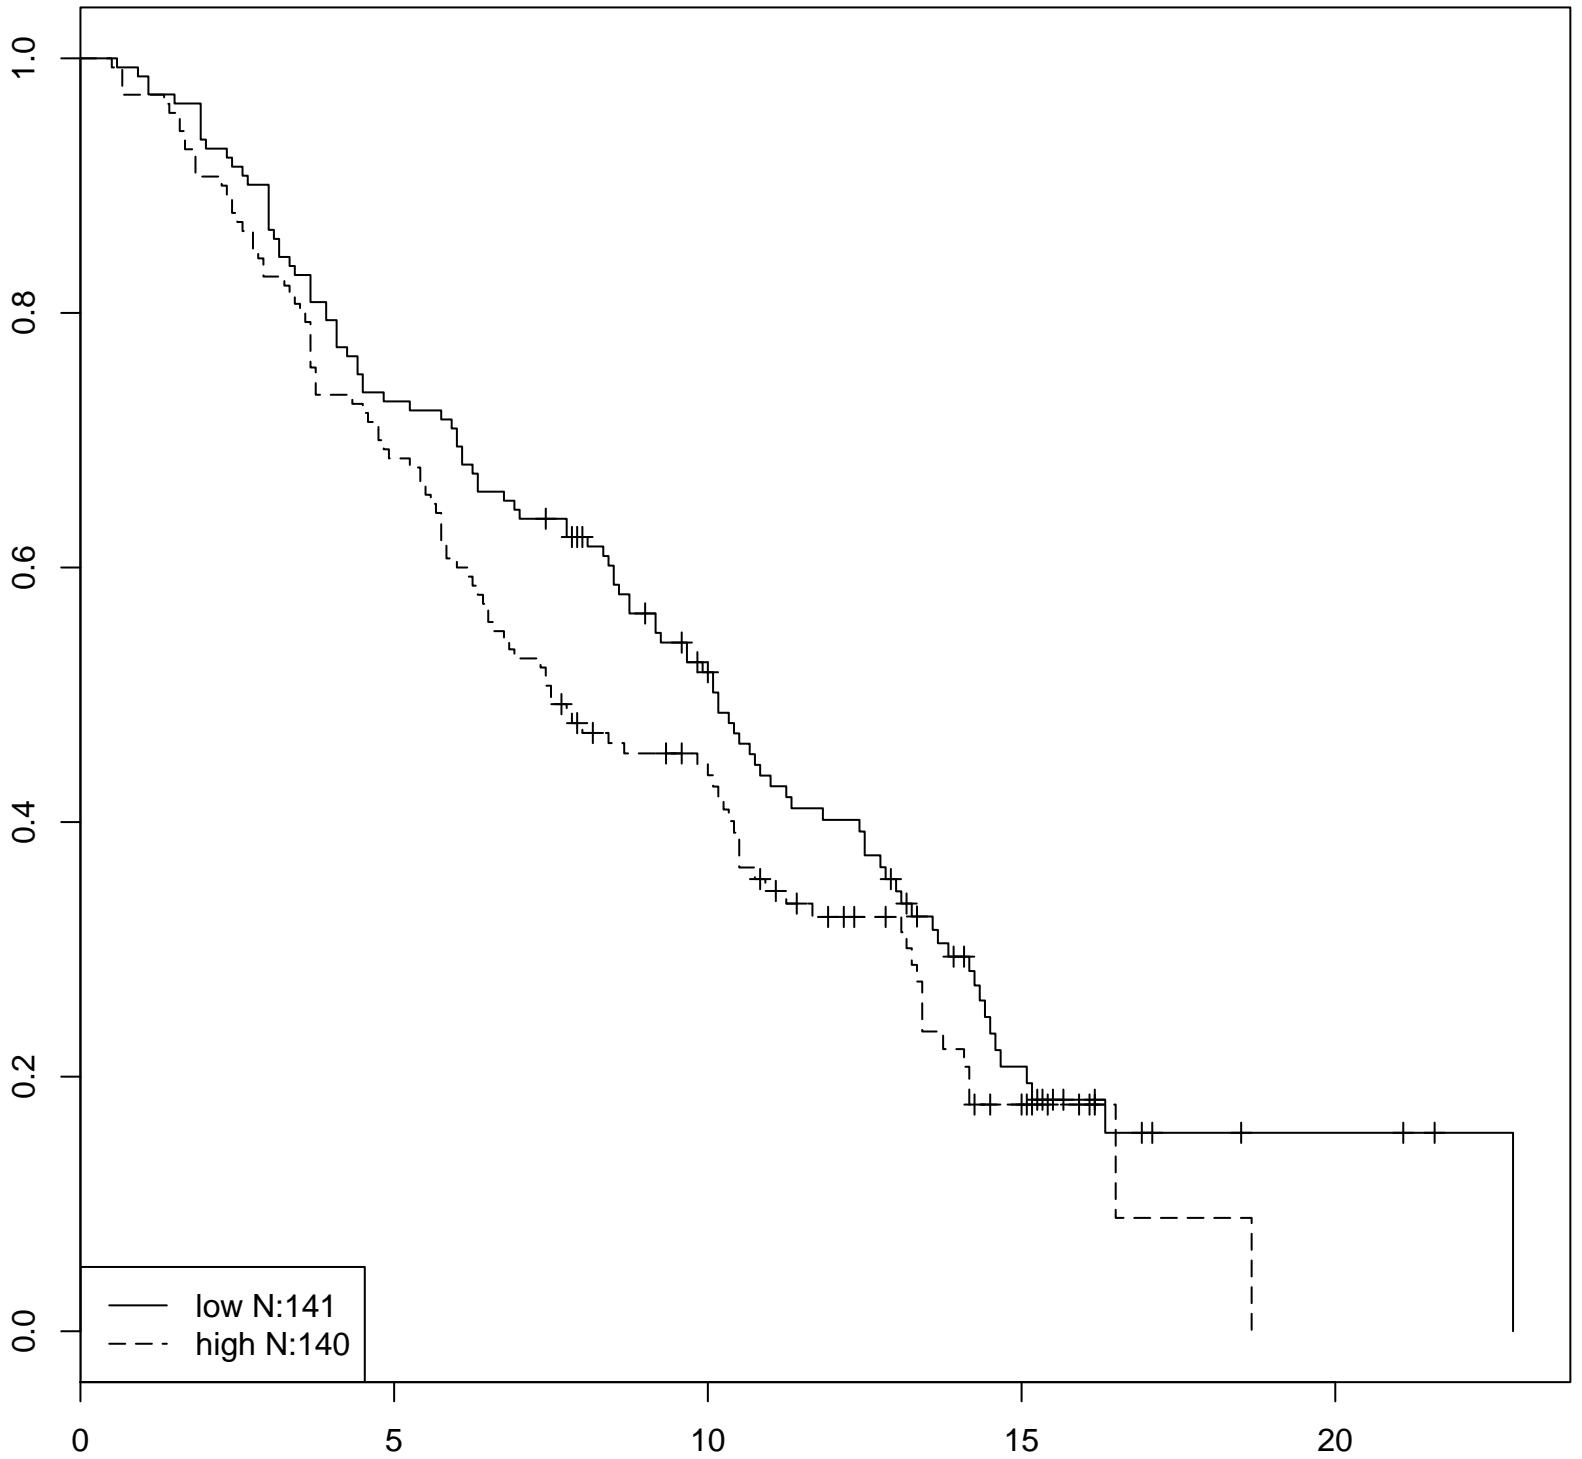

years

log-rank test p-value = 0.108

# Survival by CD3G expression

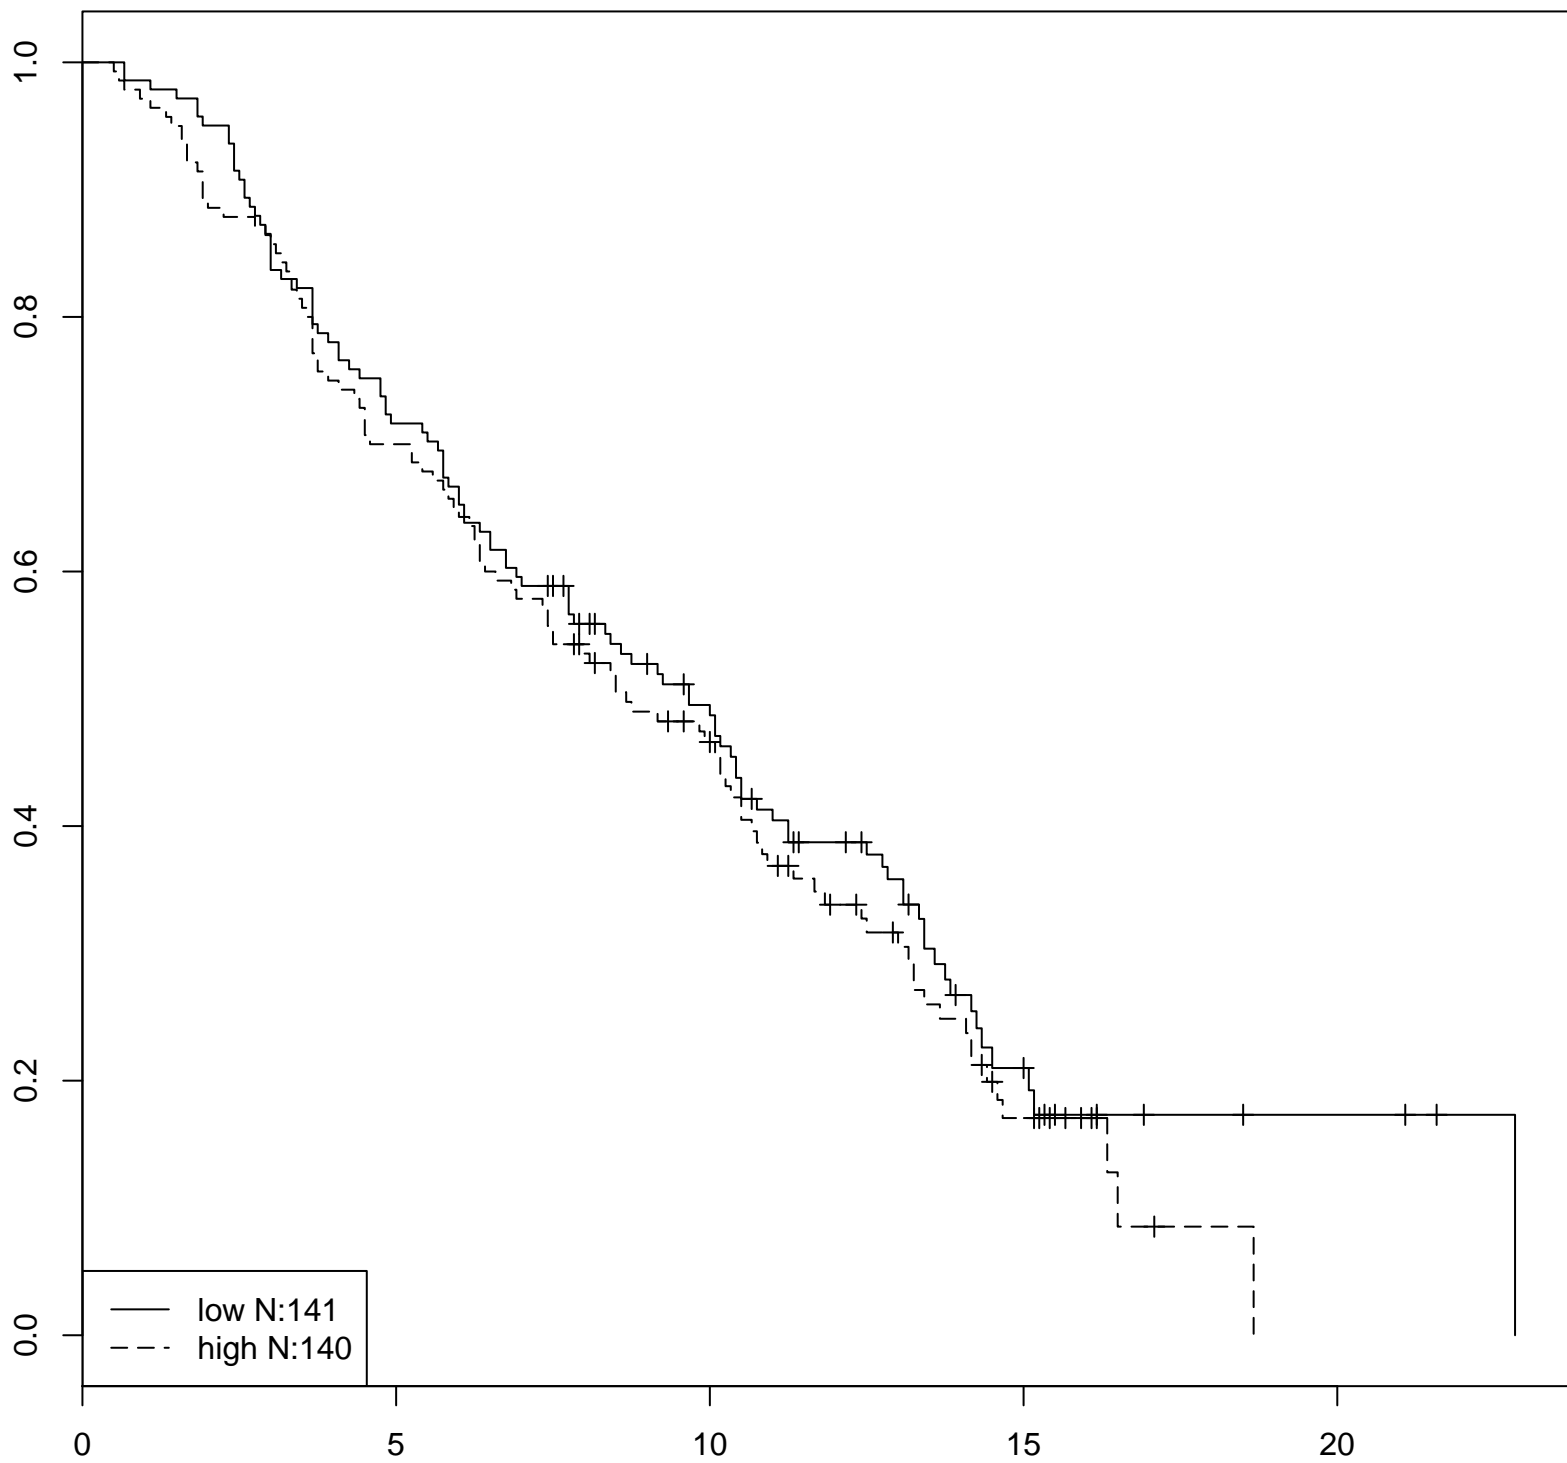

years  
log-rank test p-value = 0.406



# Survival by CD44 expression

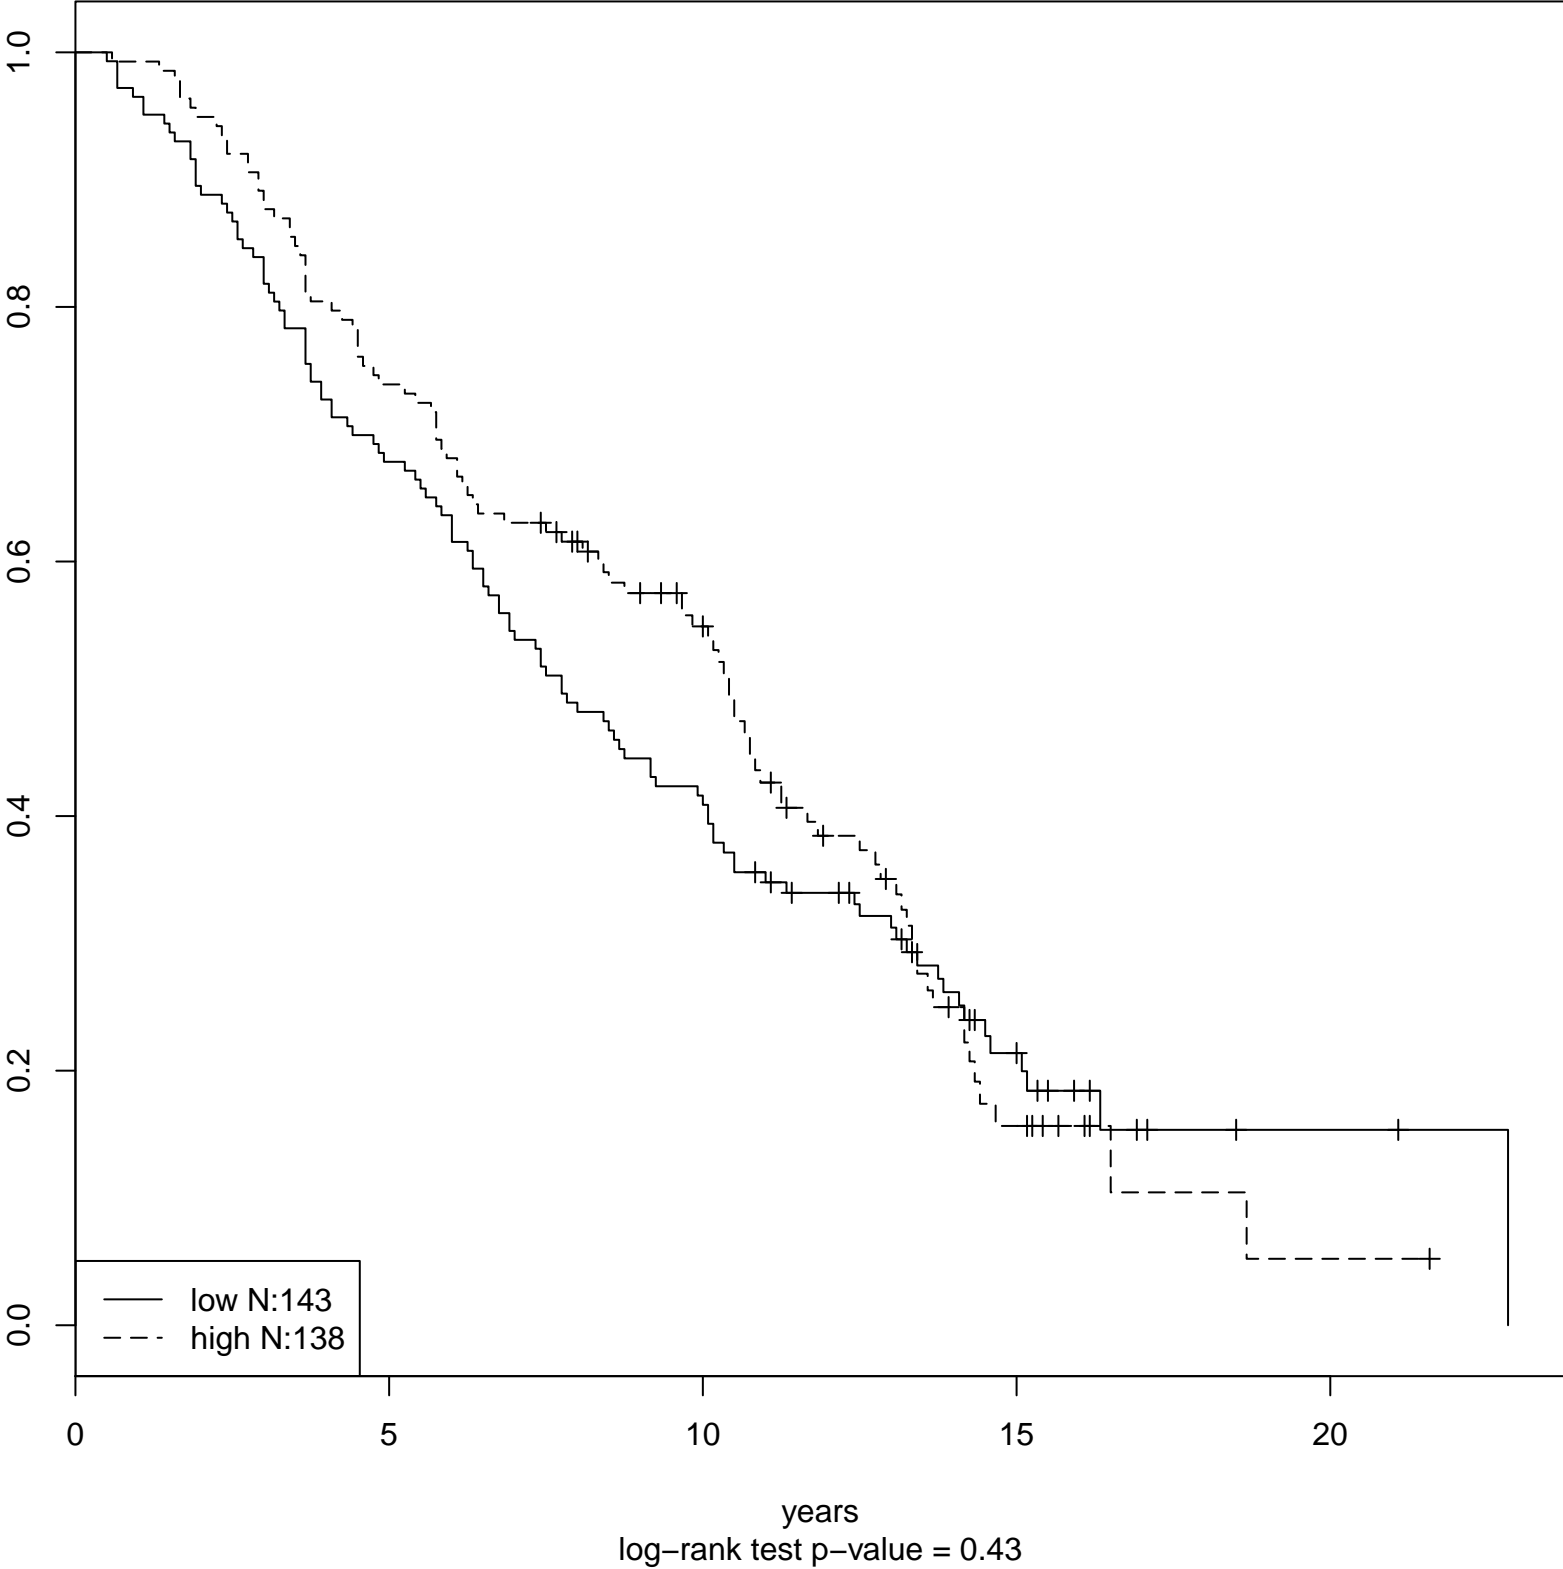

# Survival by CD8A expression

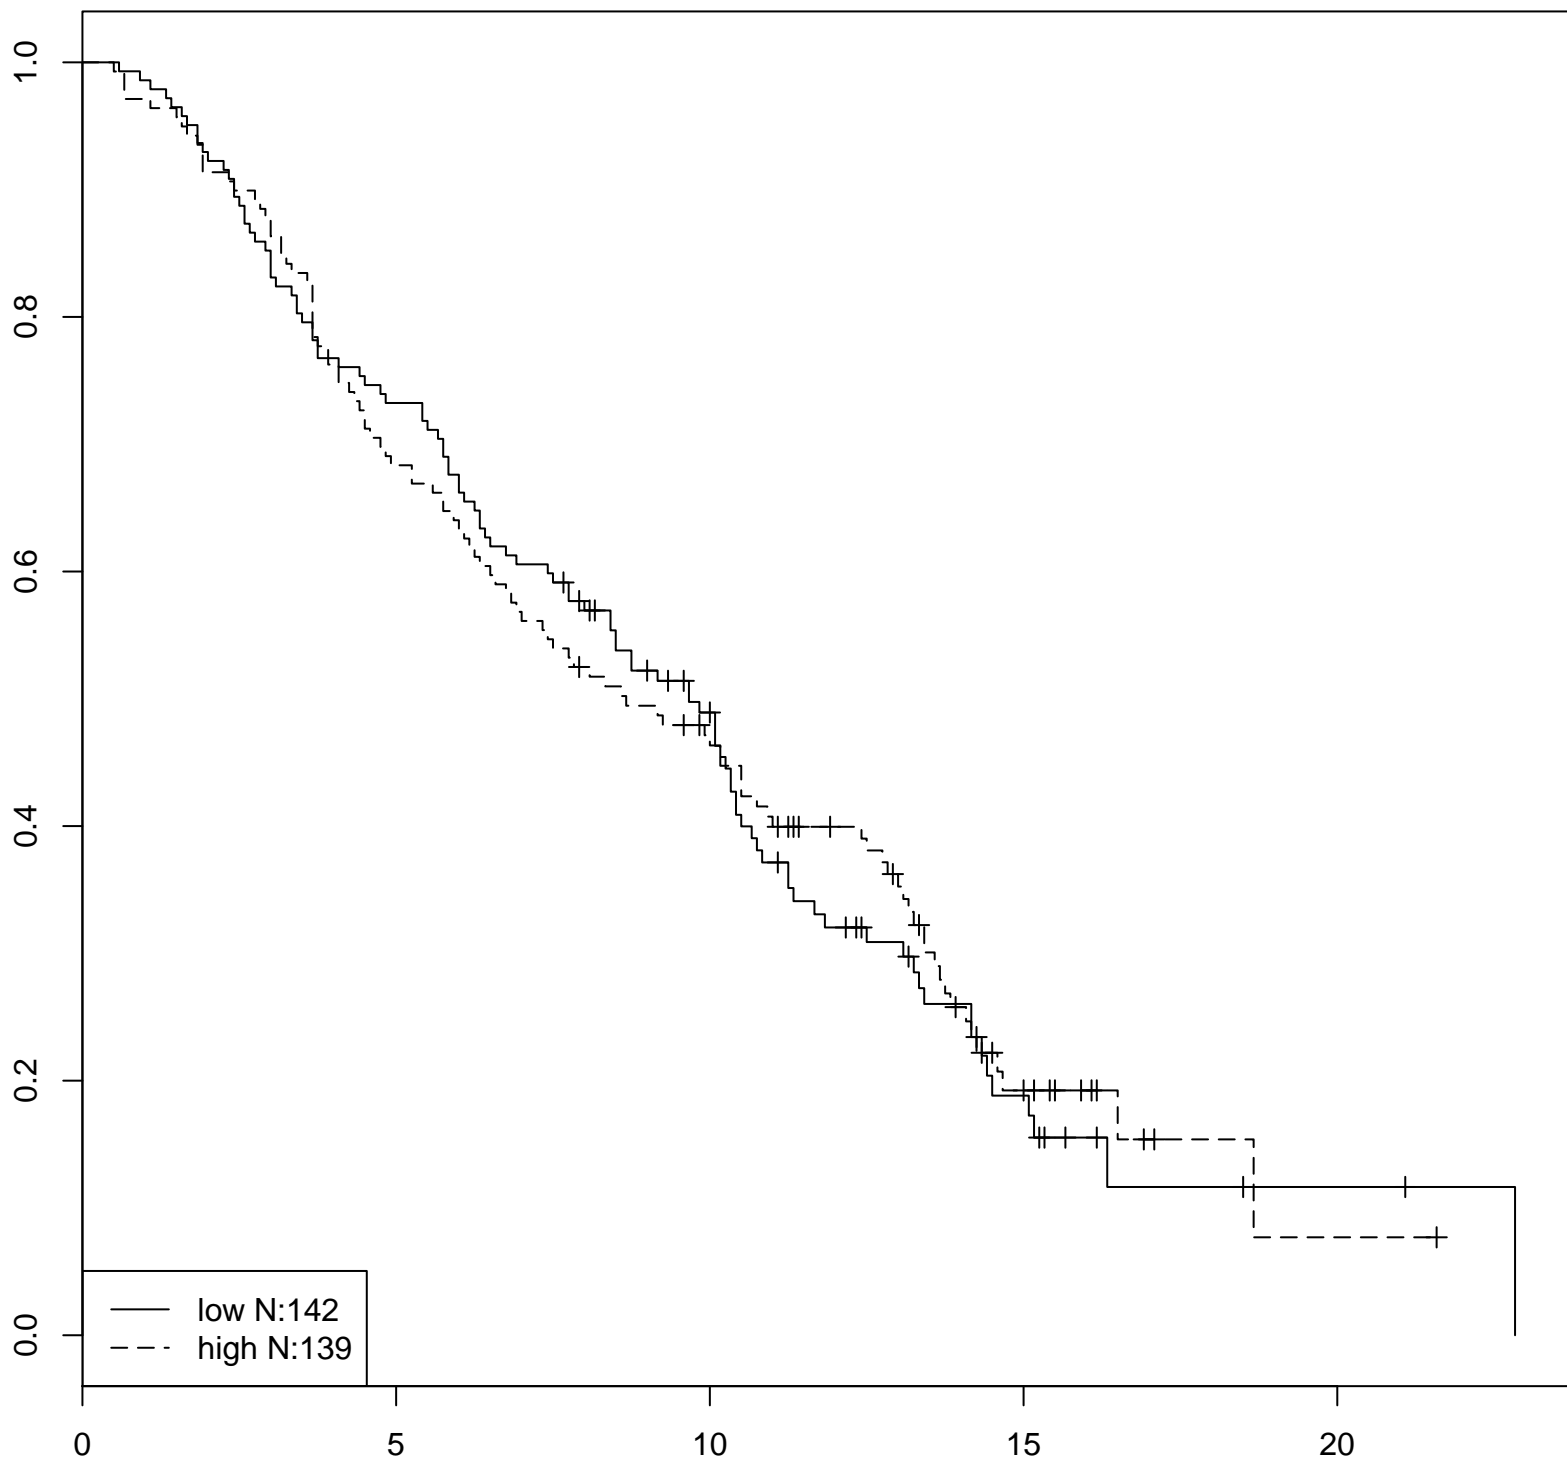

log-rank test p-value = 0.852

# Survival by CDKN1A expression

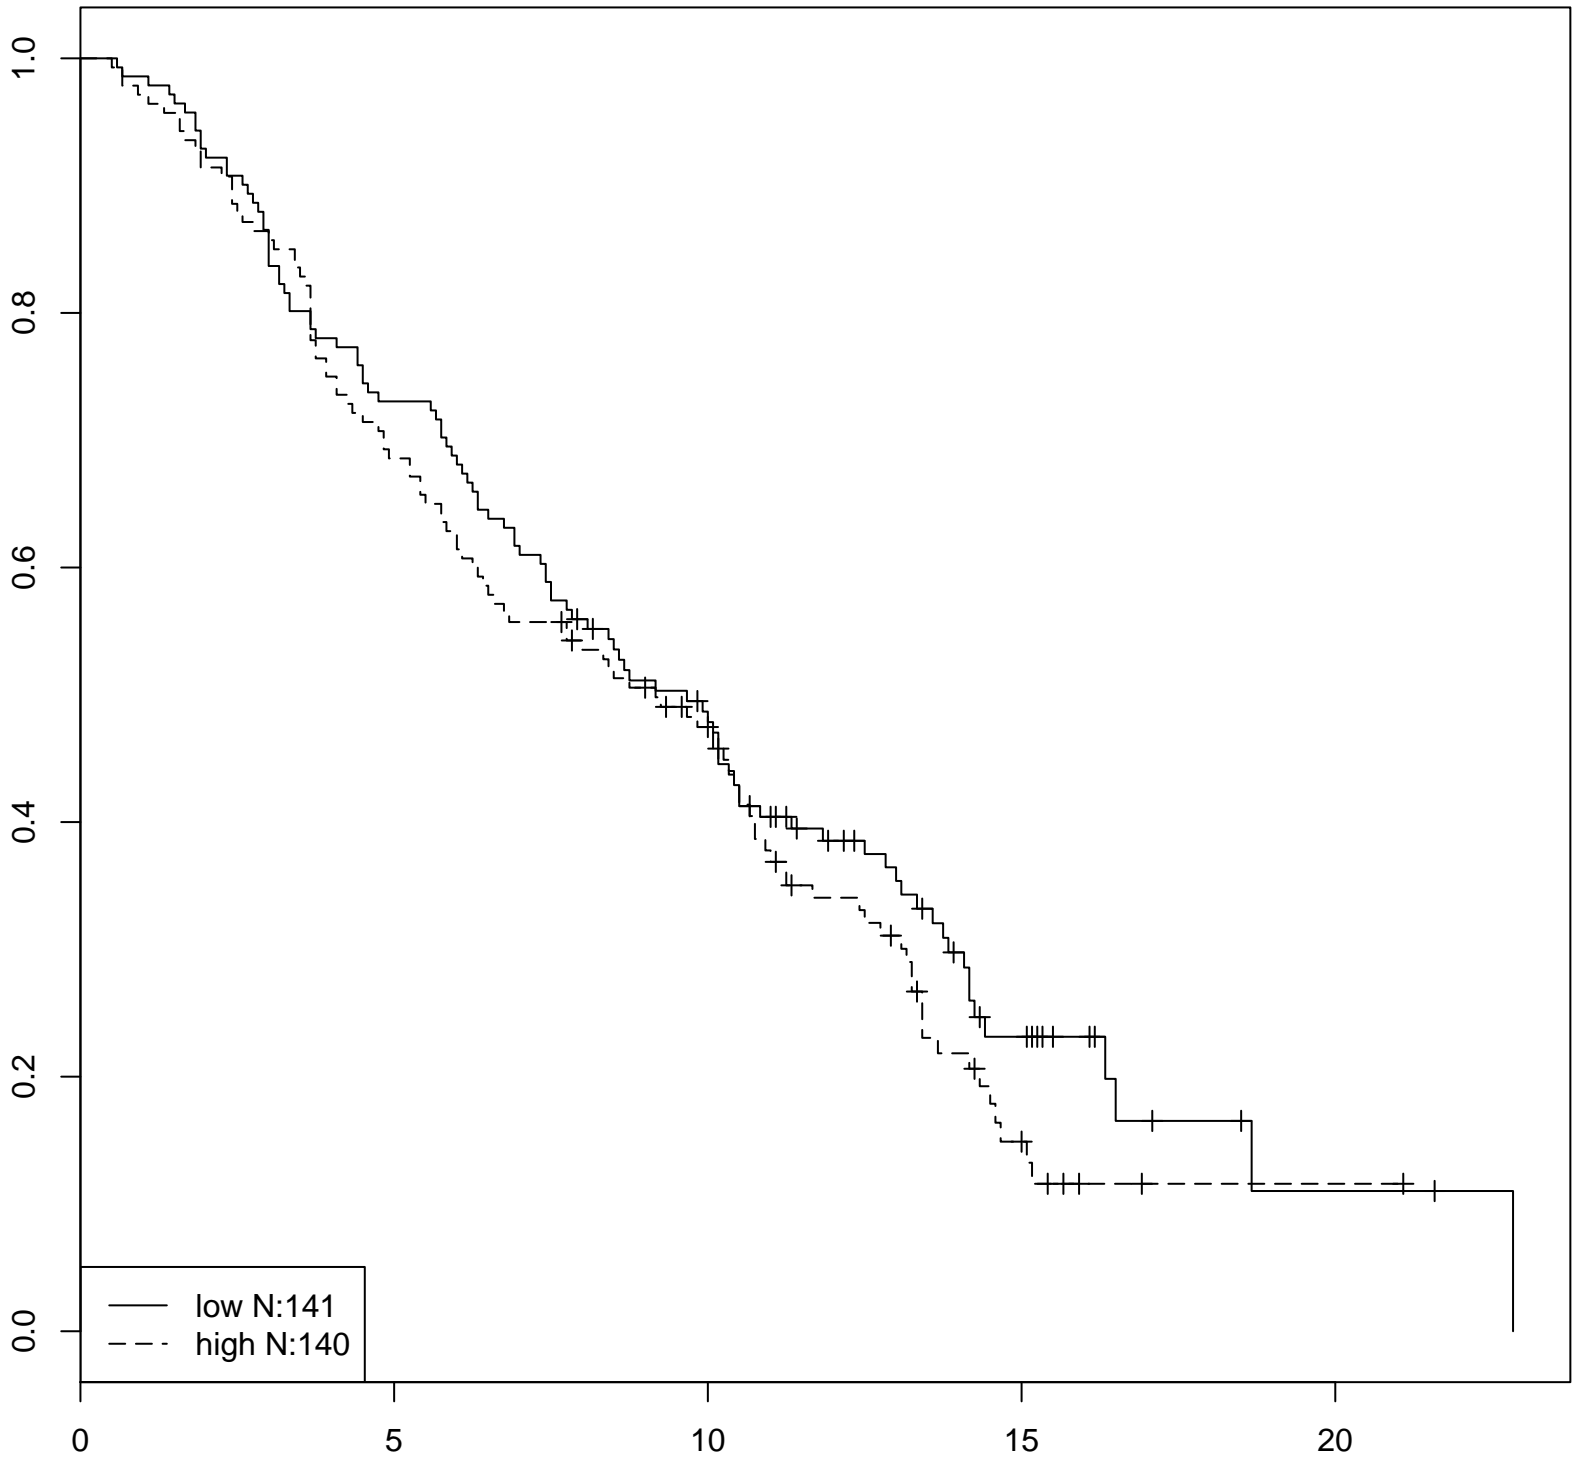

years

log-rank test p-value = 0.269

# Survival by CDKN2A expression

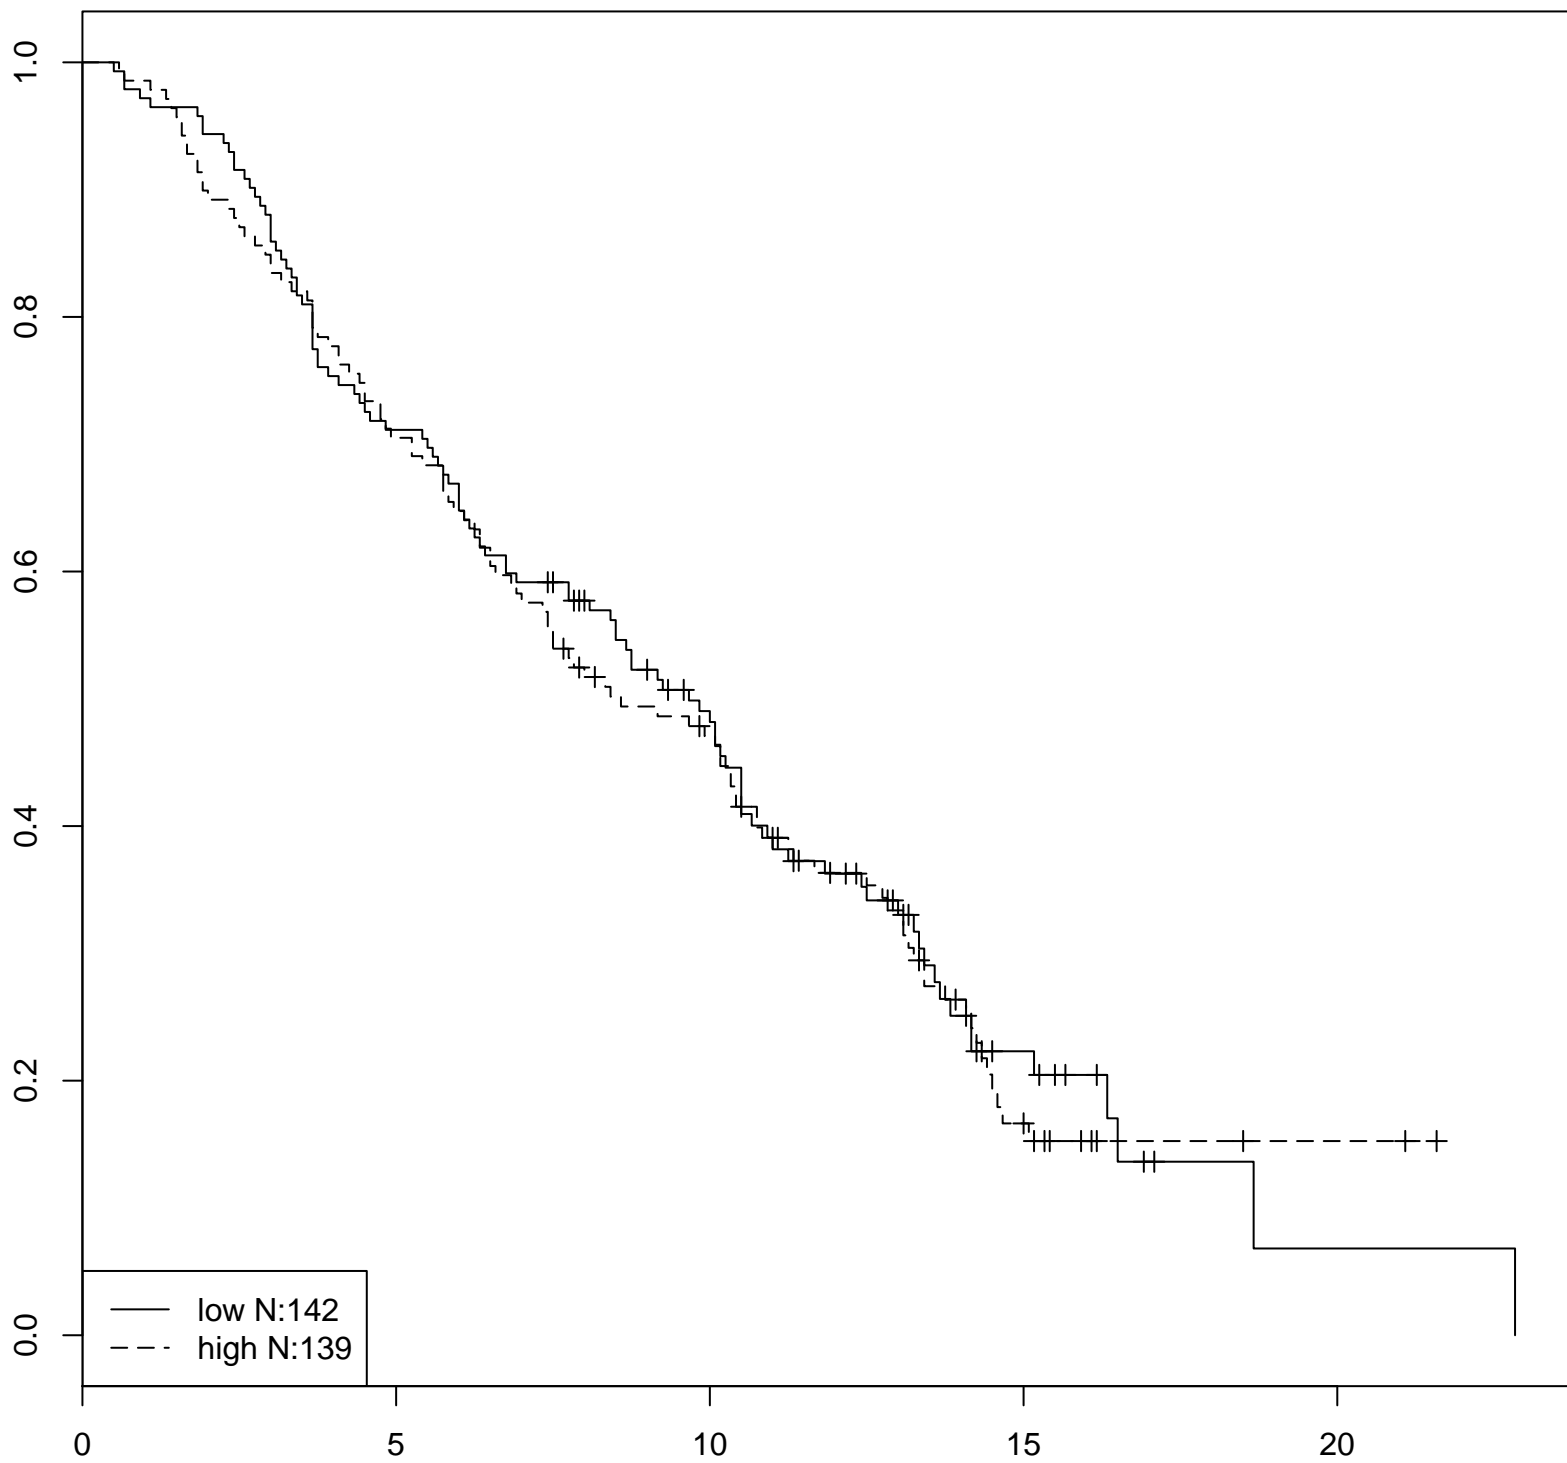

years

log-rank test p-value = 0.76

# Survival by CGA expression

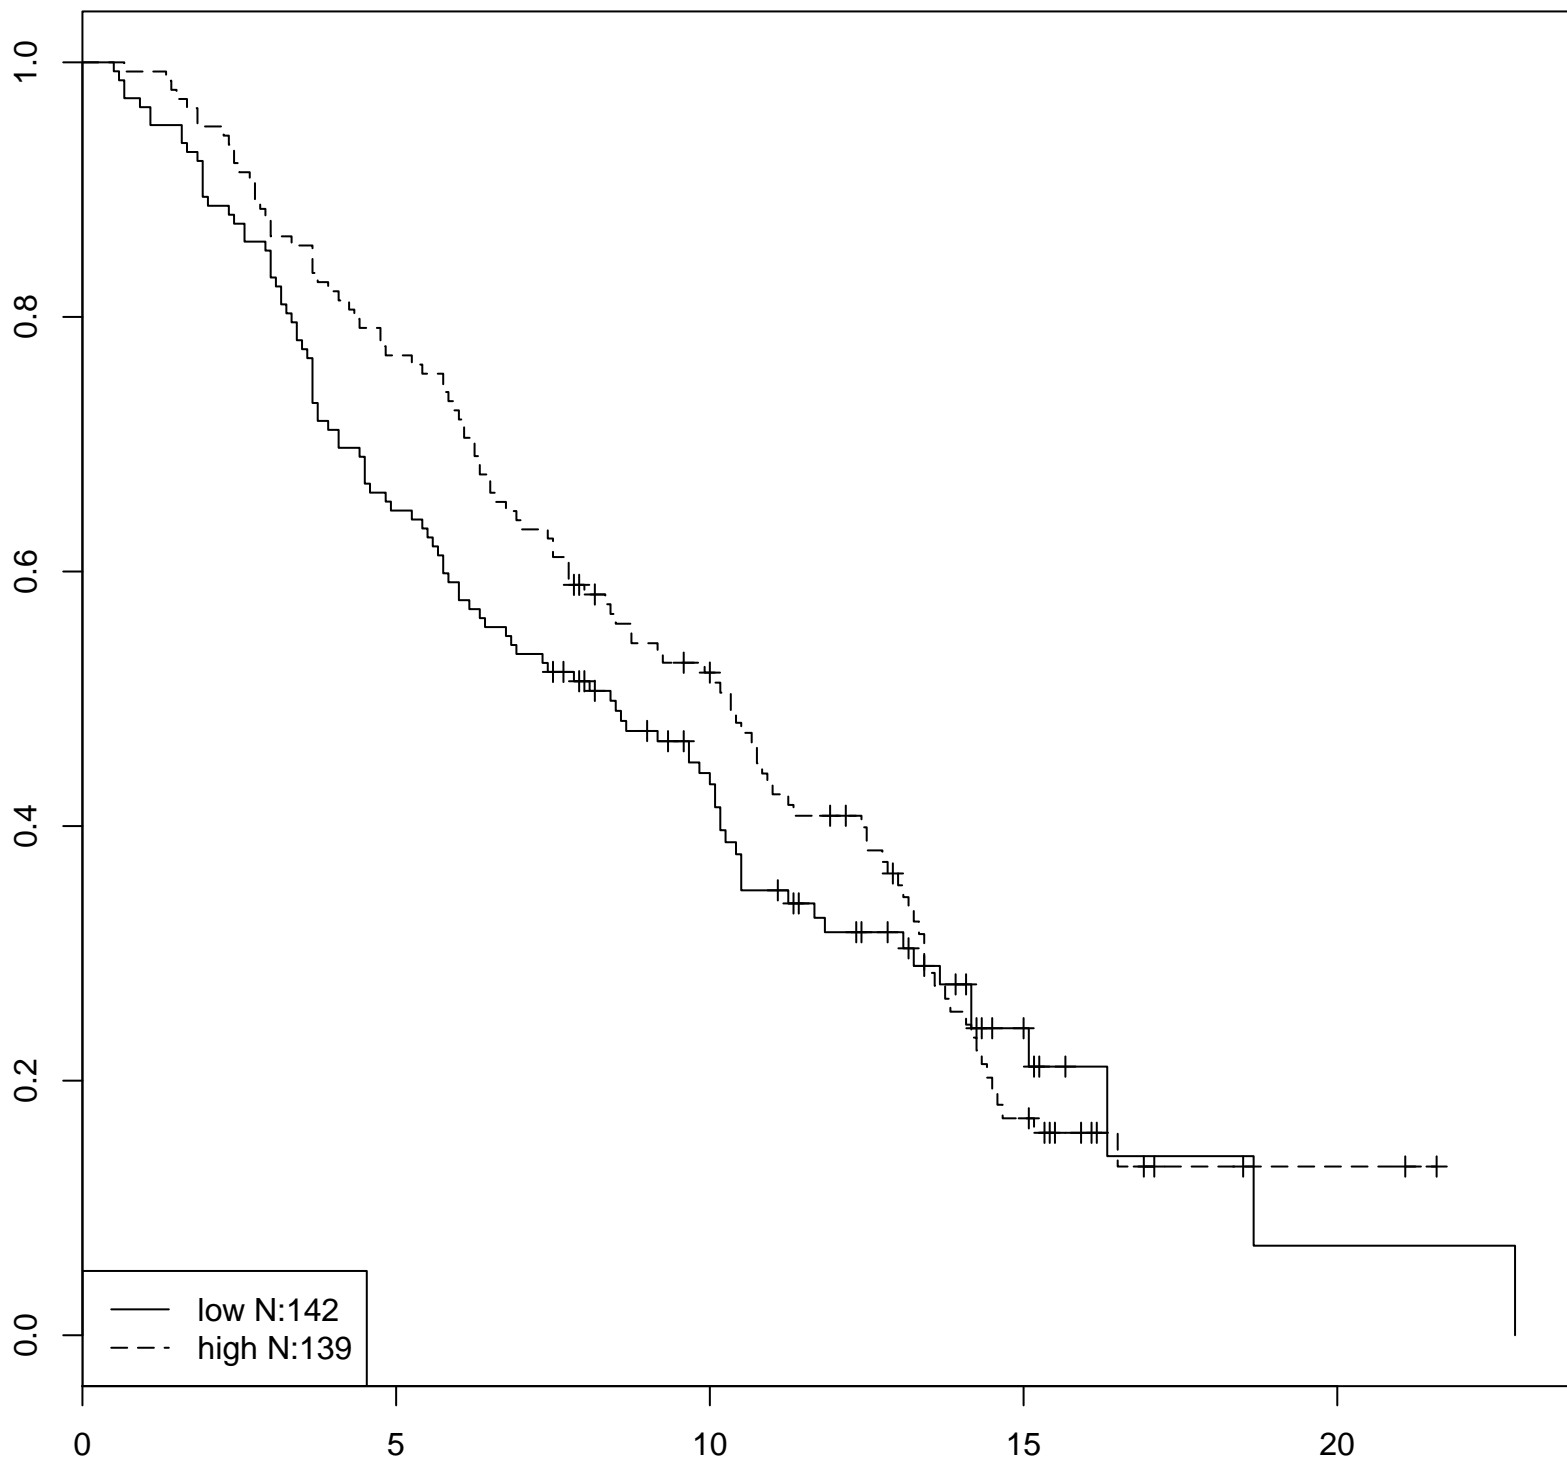

# Survival by CHGA expression

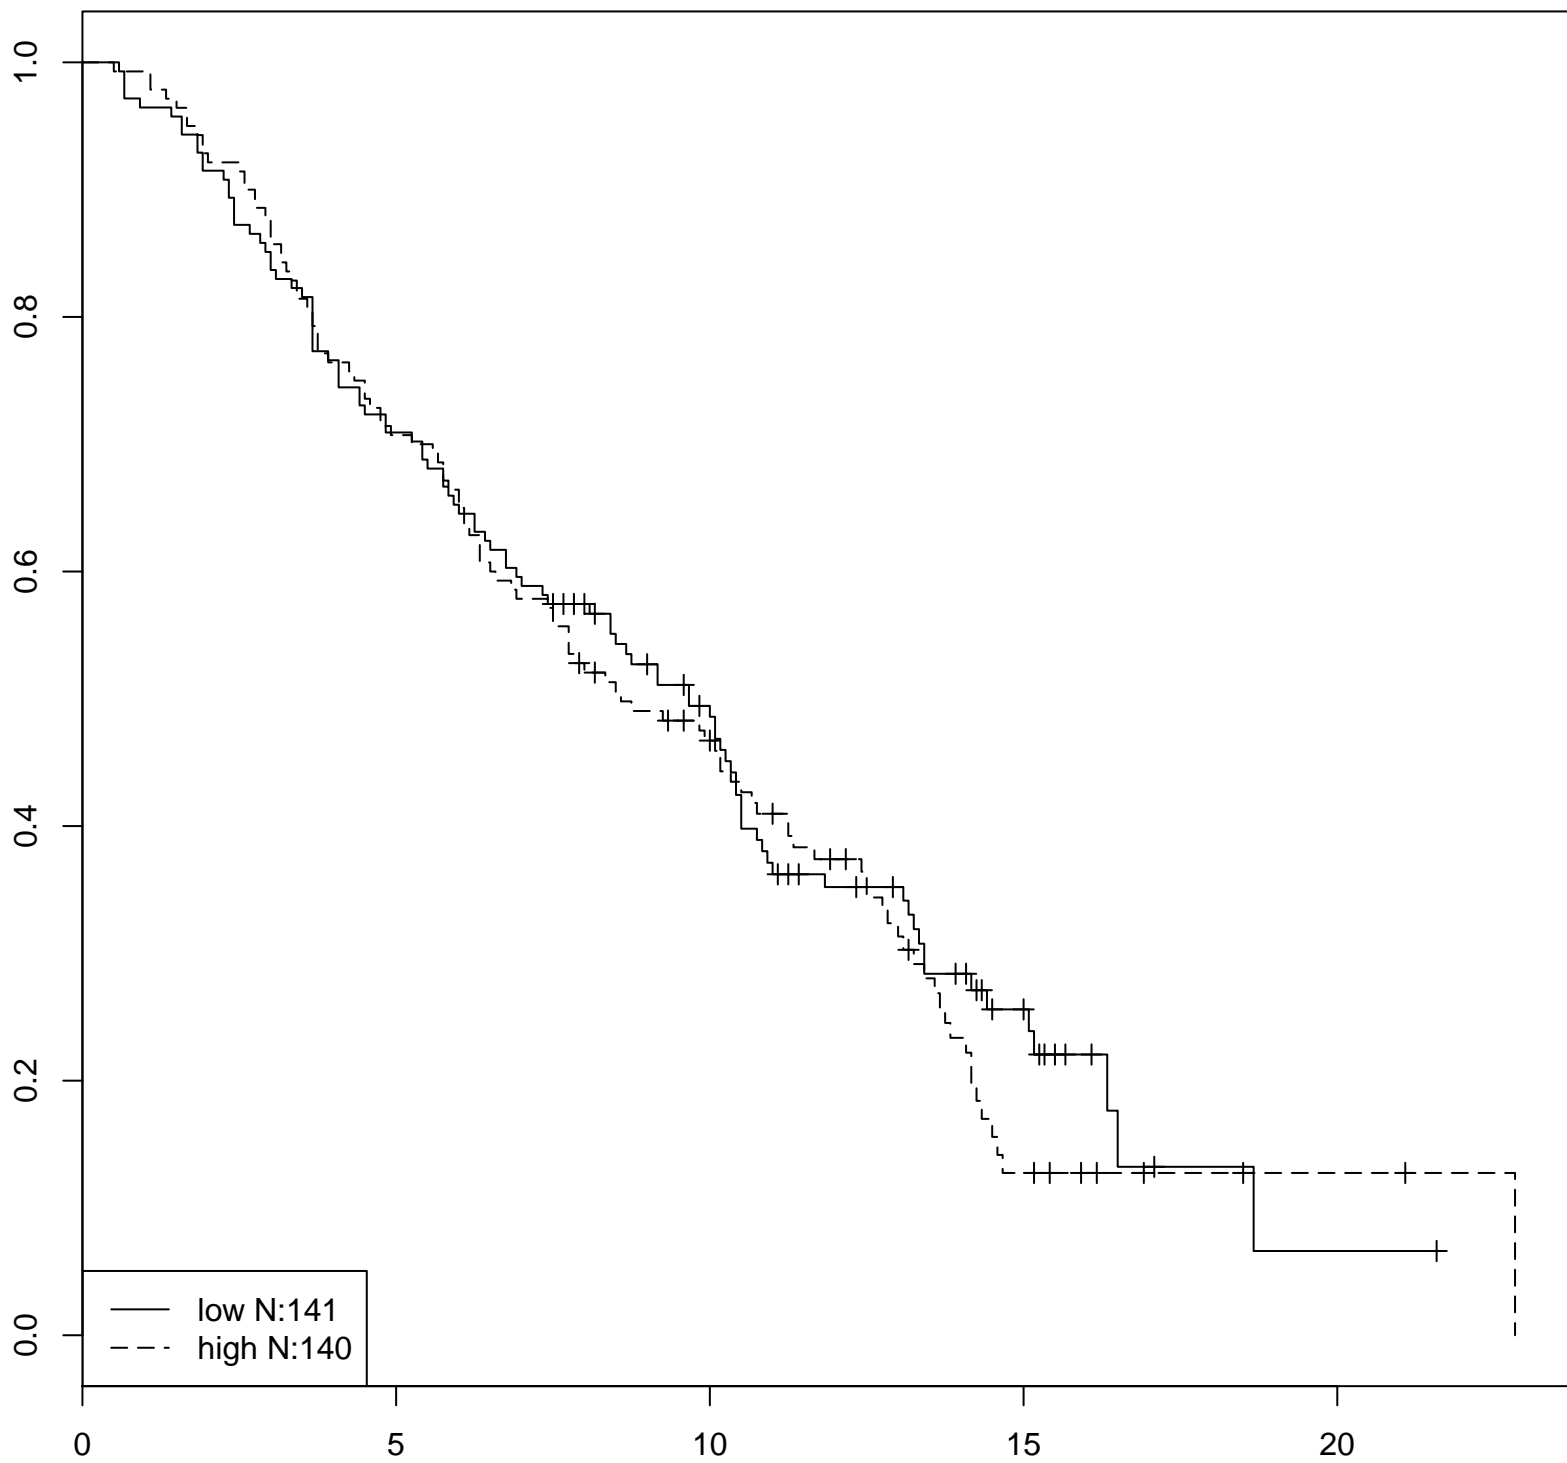

years

log-rank test p-value = 0.558

# Survival by CHI3L1 expression

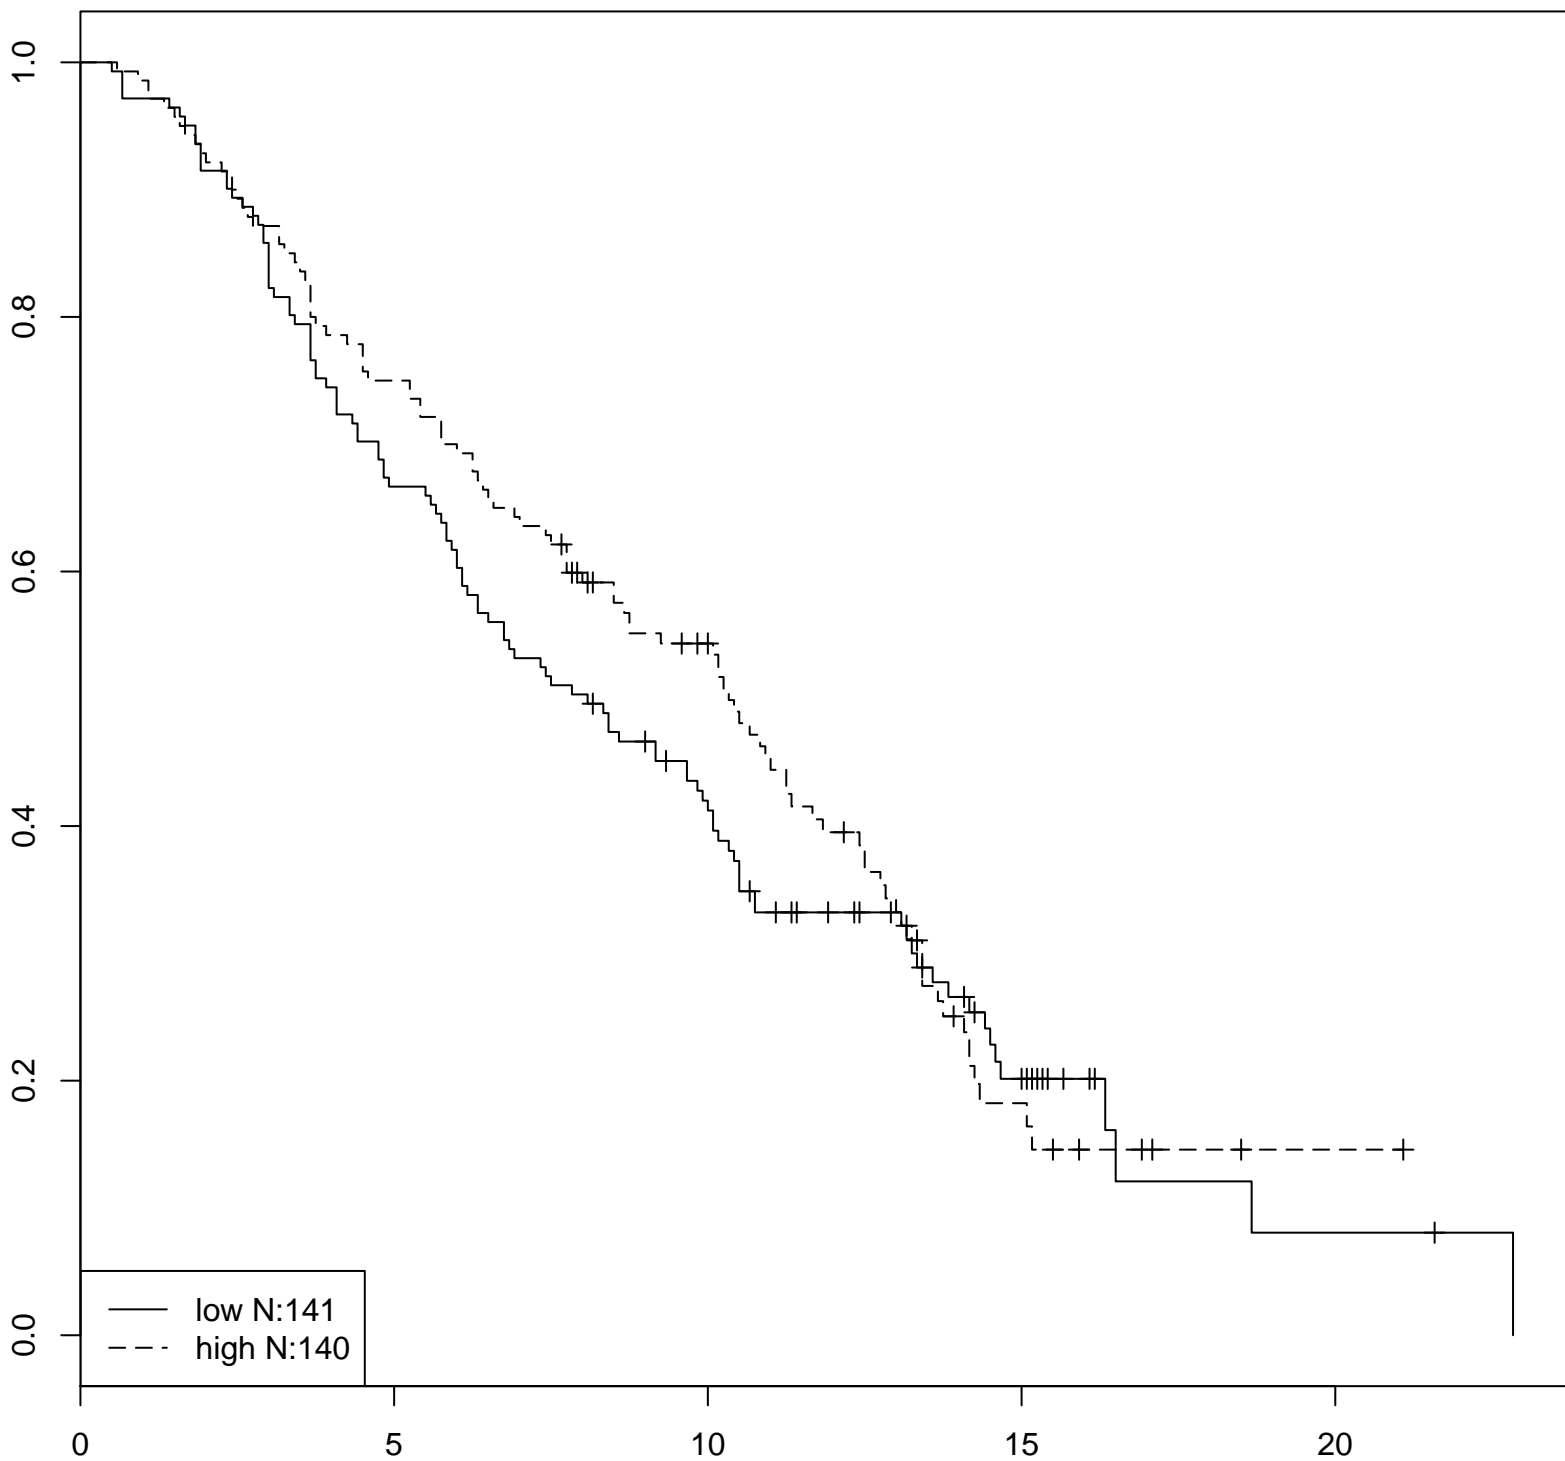

years

log-rank test p-value = 0.413

# Survival by CHIT1 expression

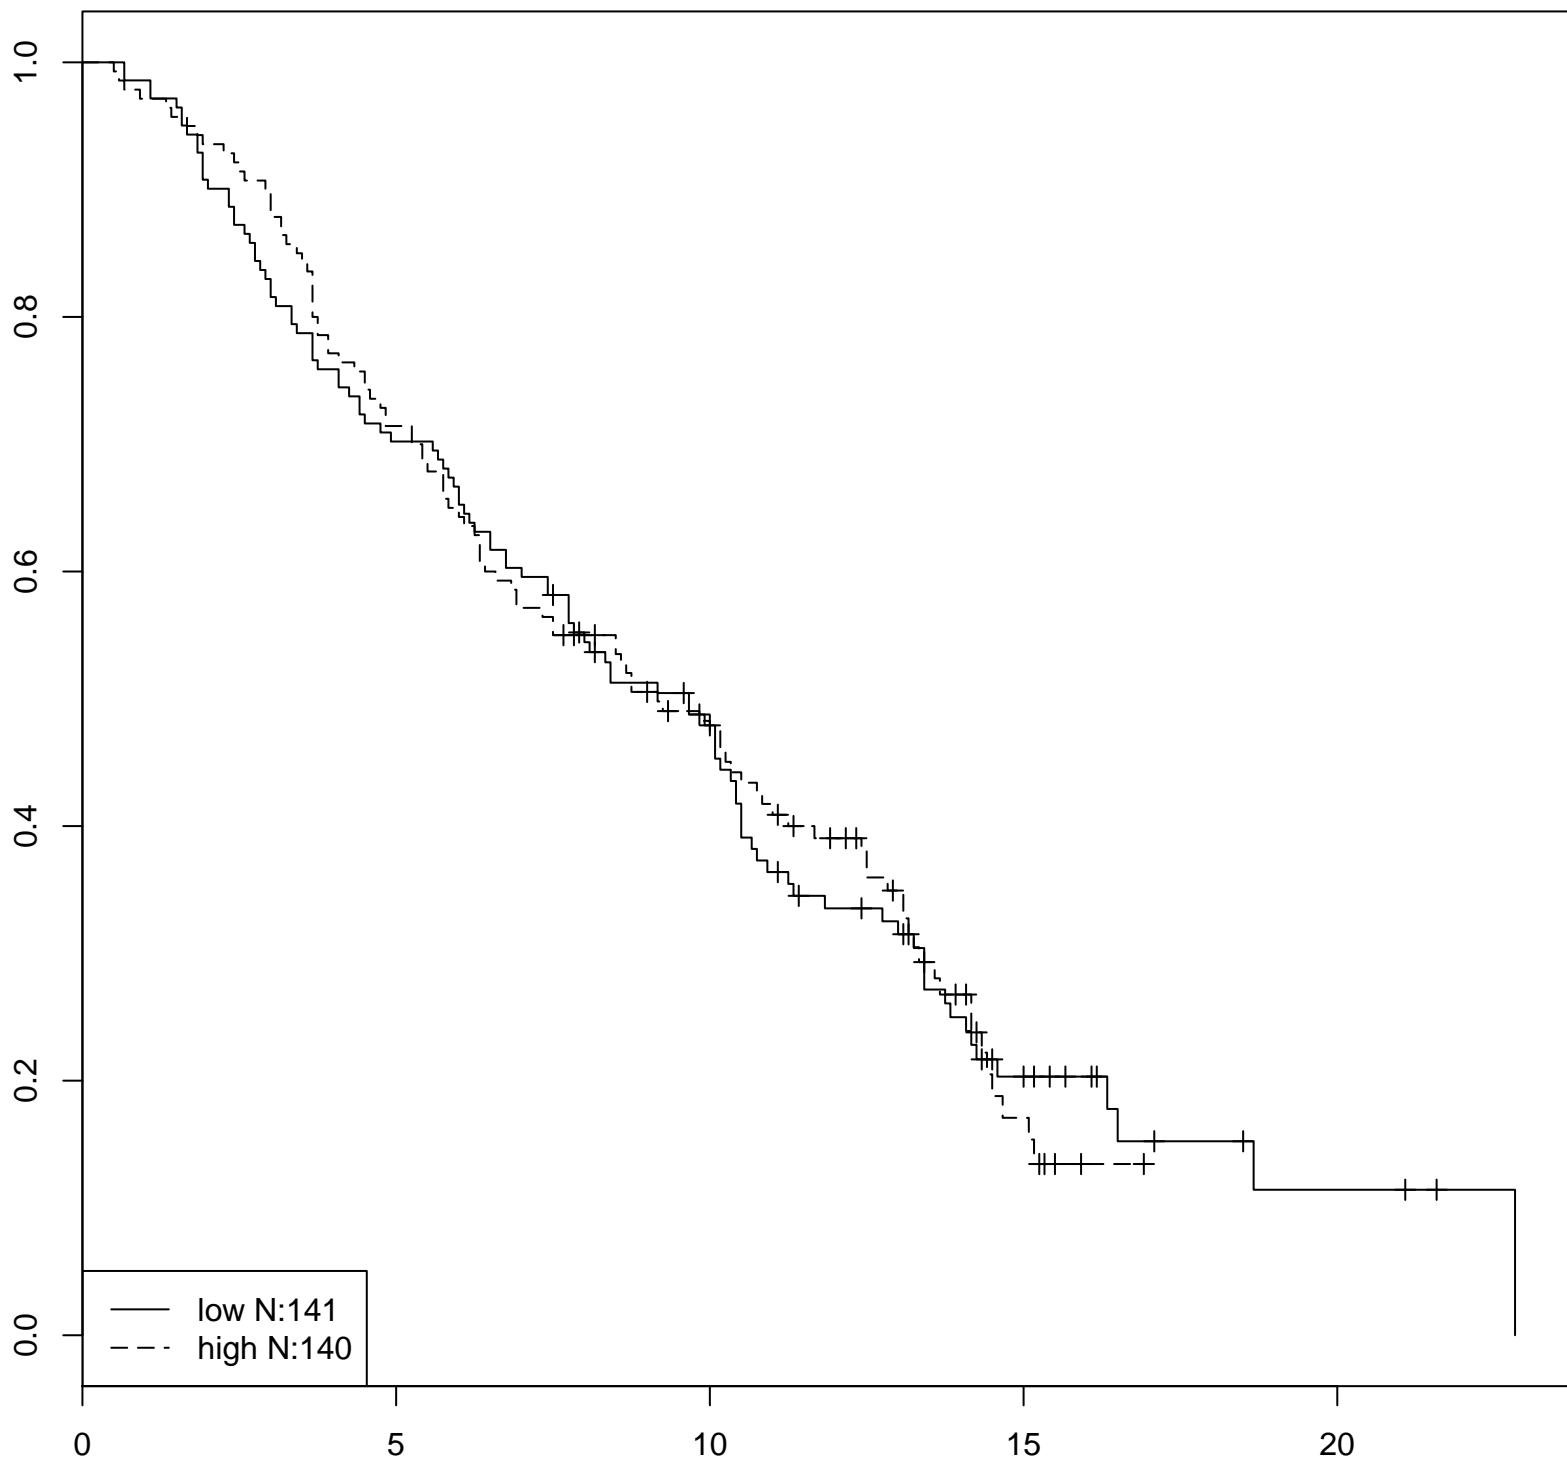

years

log-rank test p-value = 0.987



# Survival by CLDN3 expression

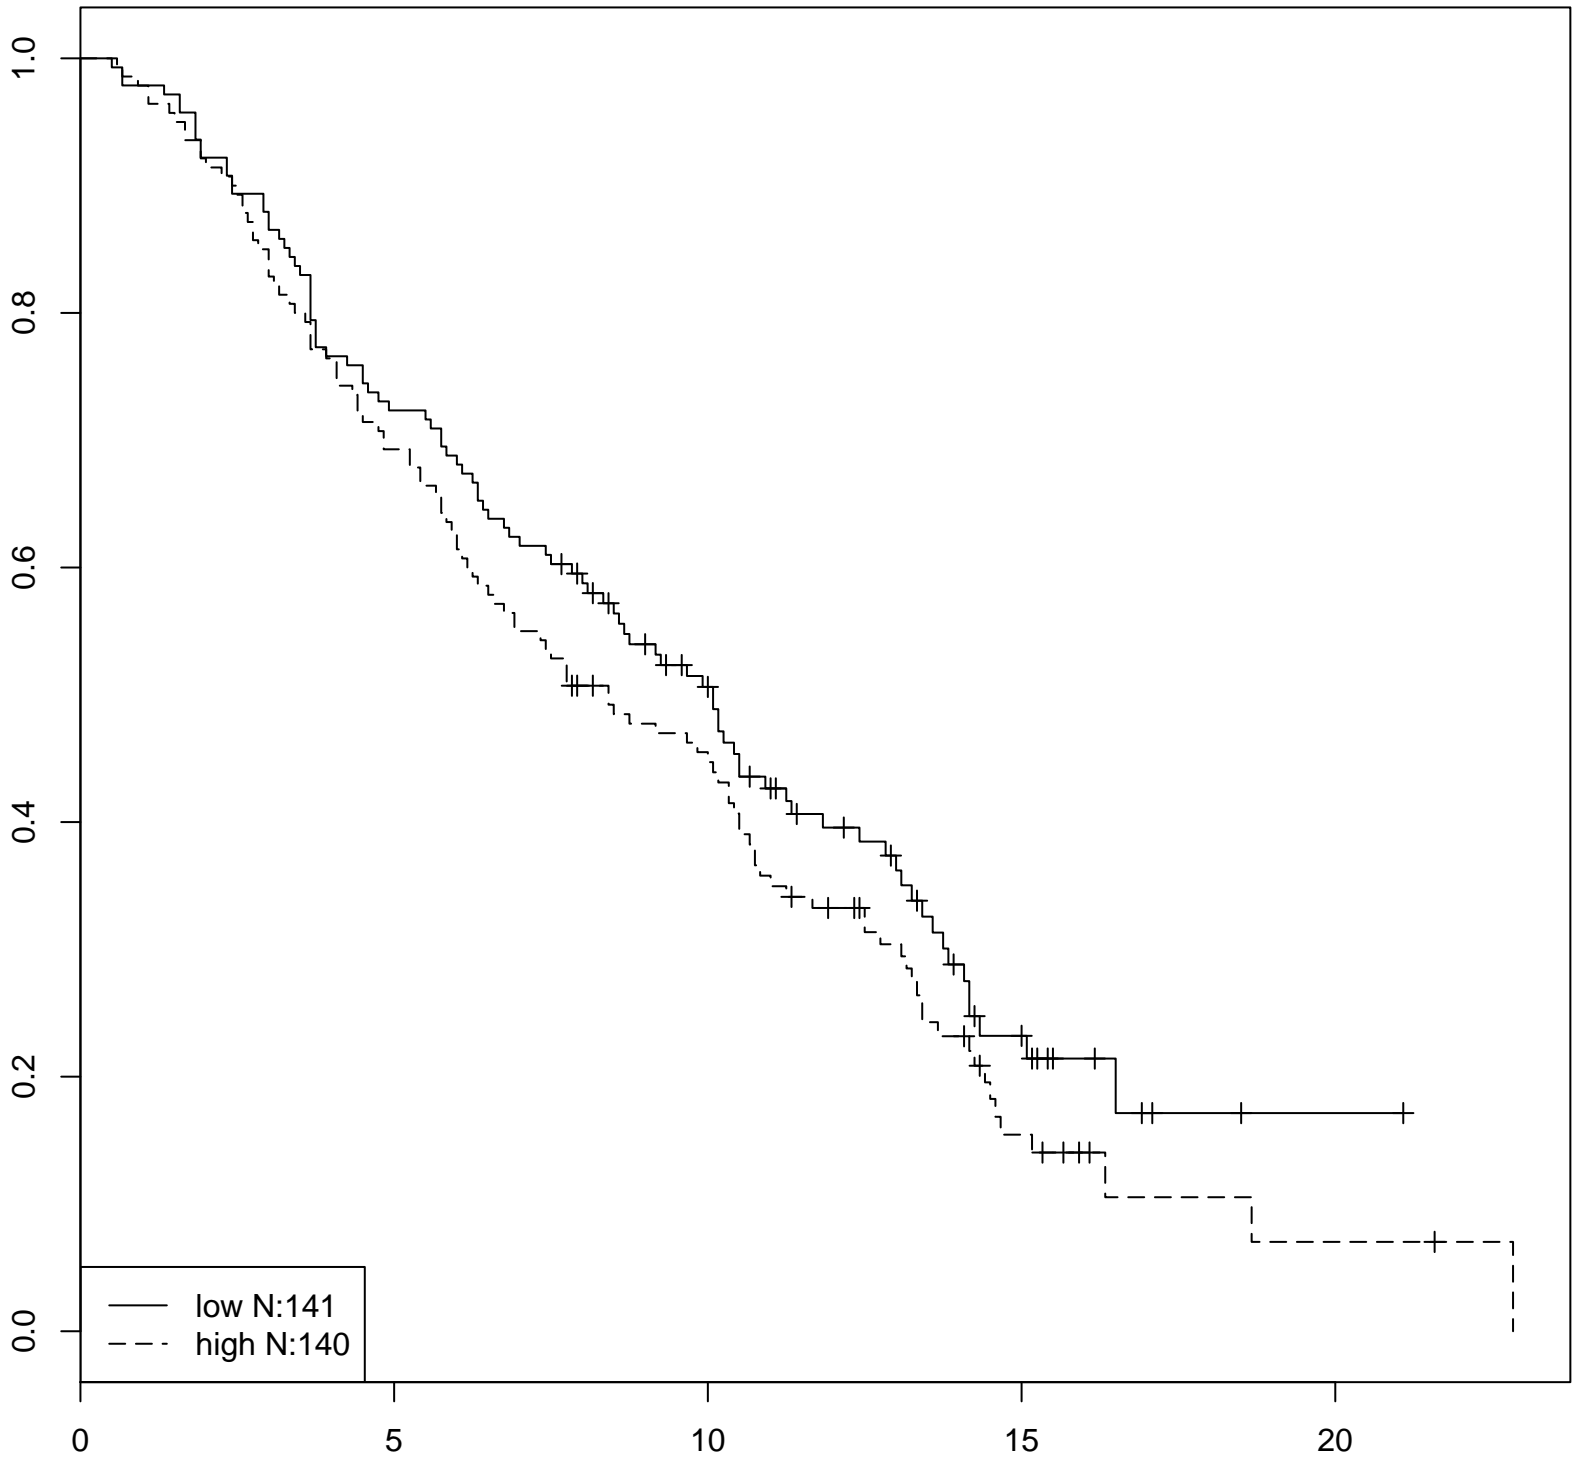

# Survival by CLDN4 expression

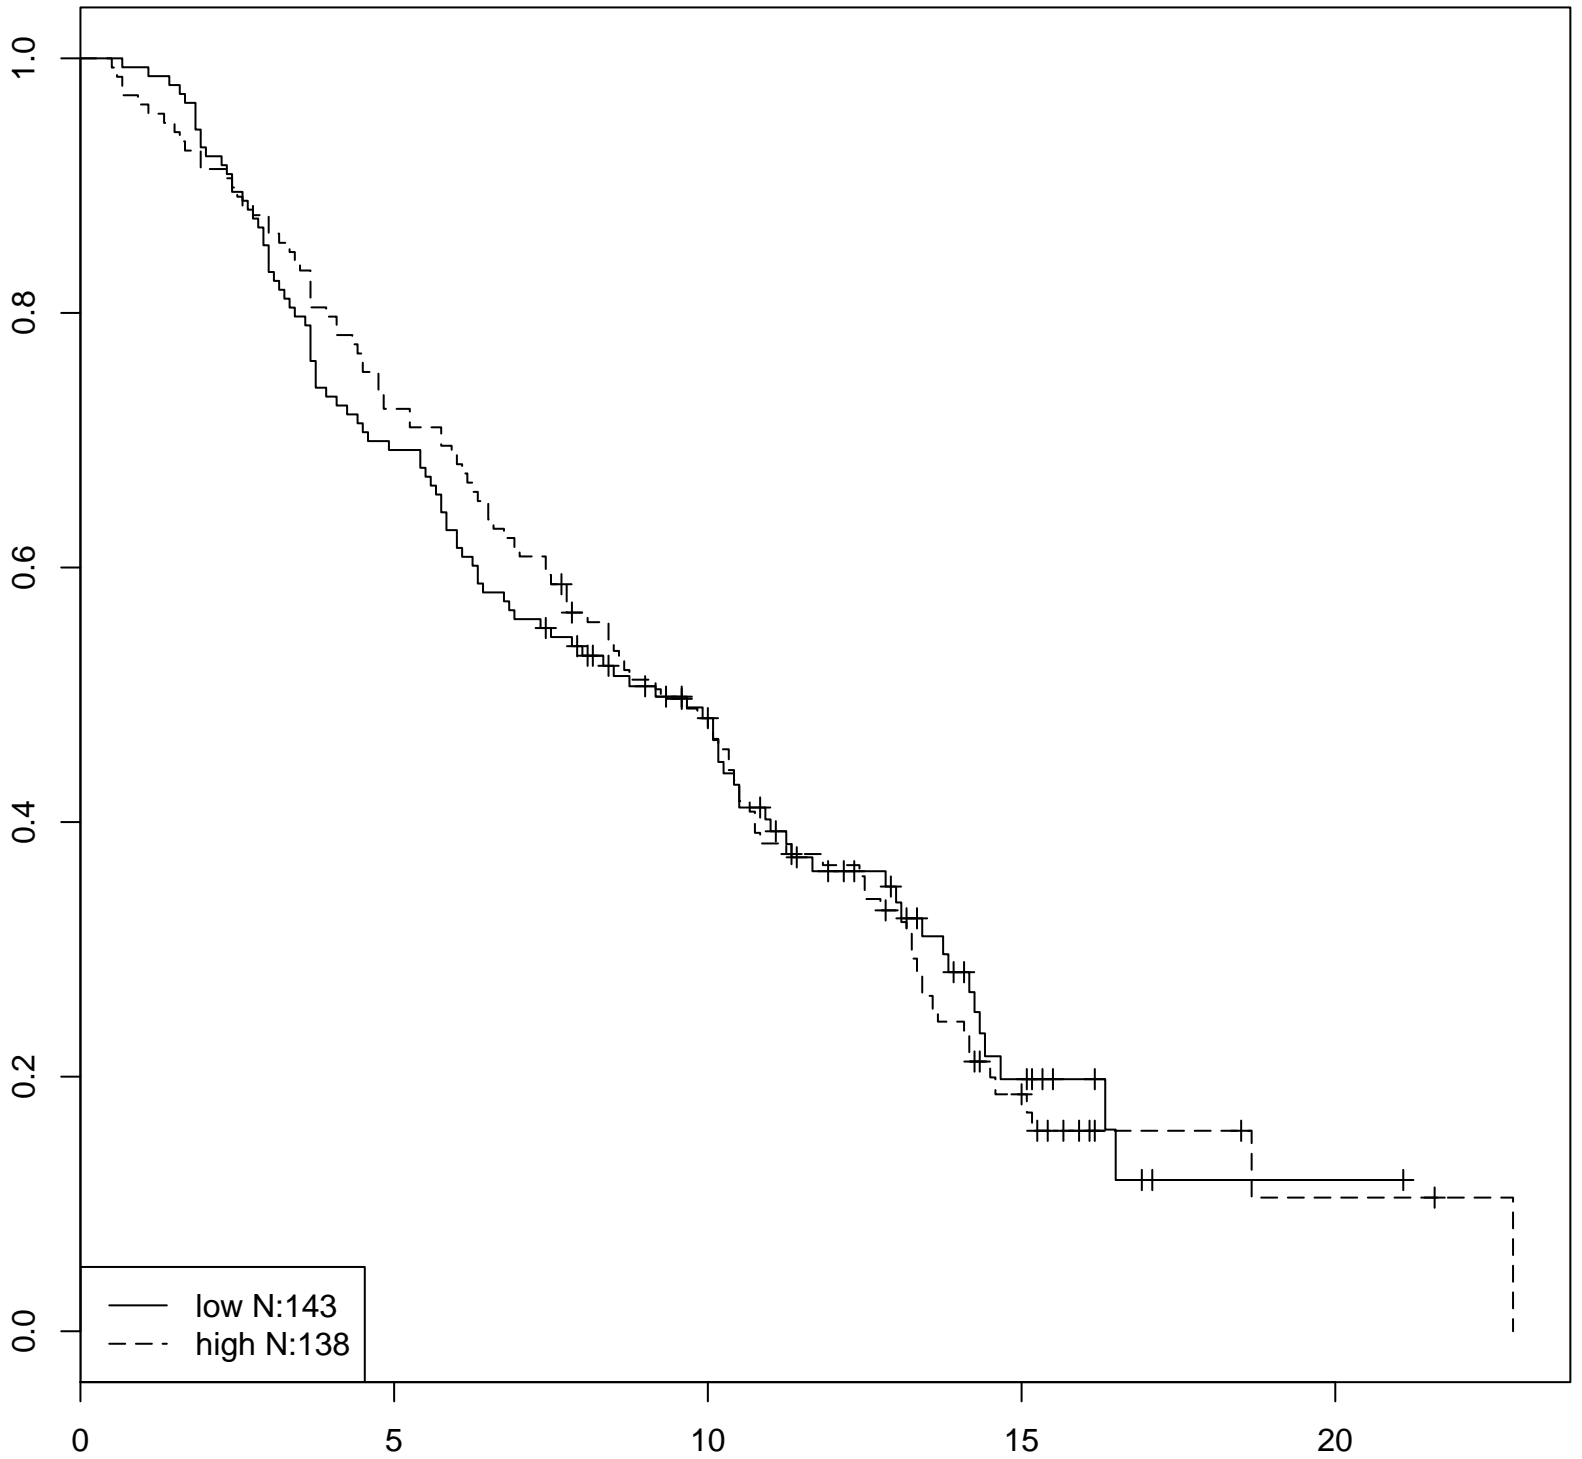

years

log-rank test p-value = 0.973

# Survival by CLSTN1 expression

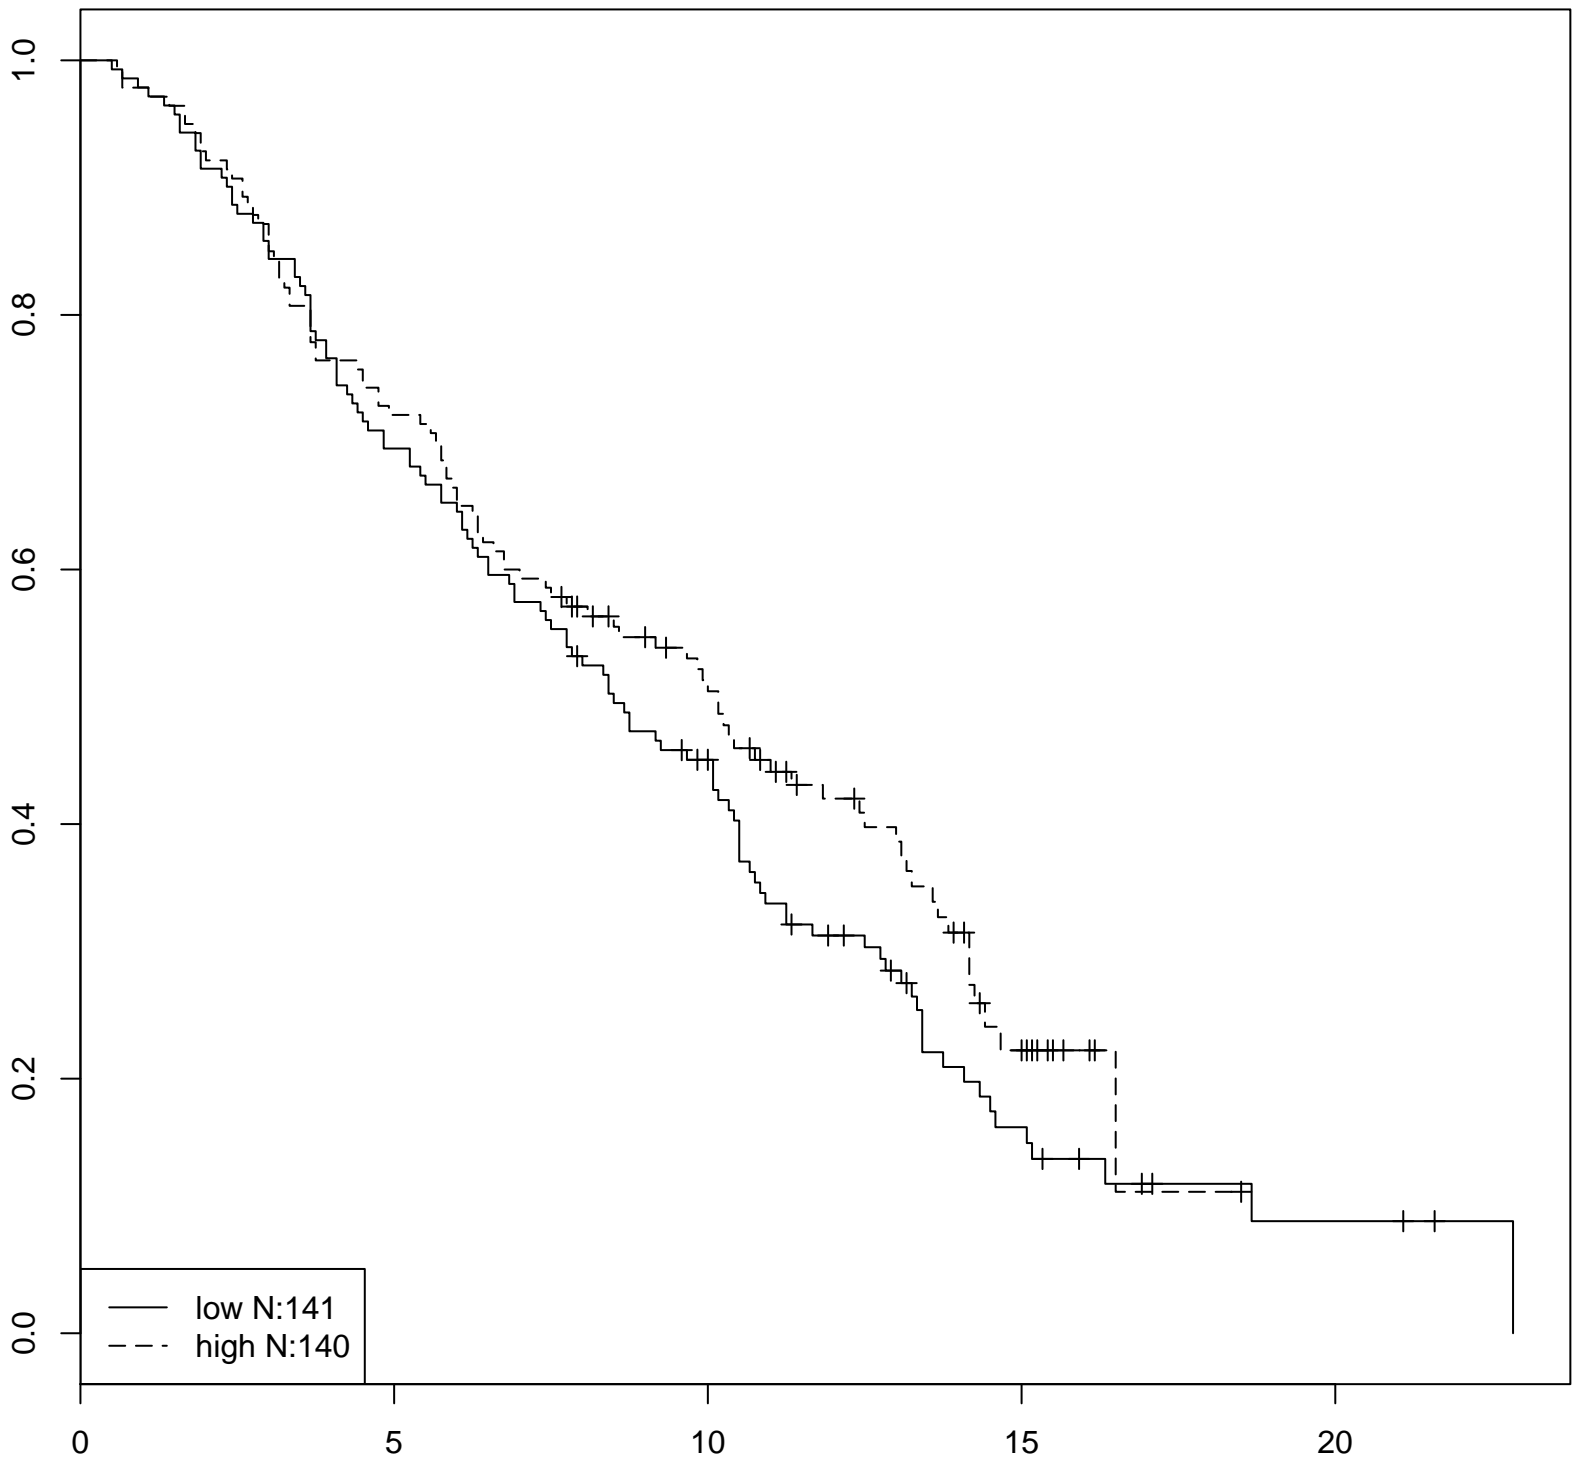

years

log-rank test p-value = 0.146

# Survival by COL1A1 expression

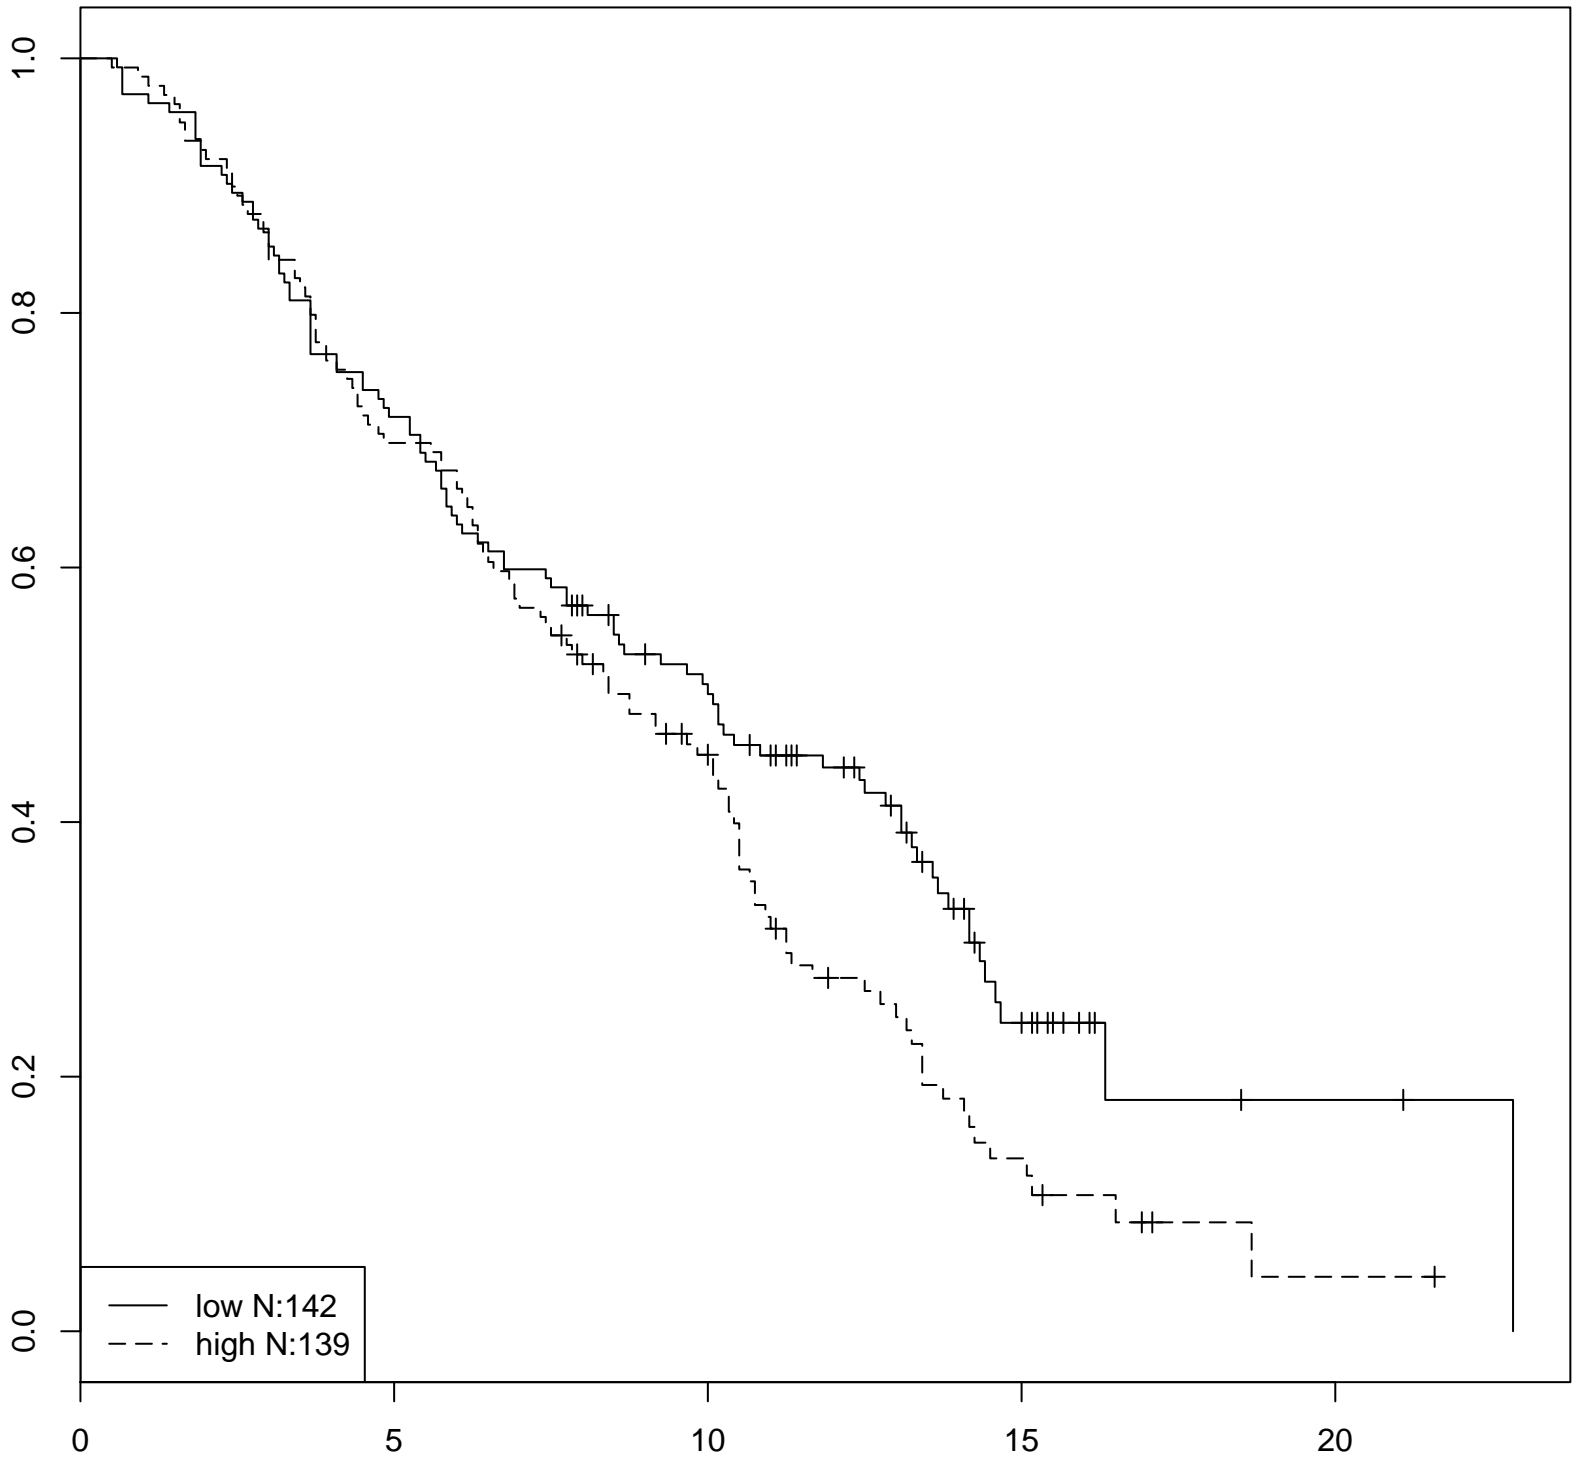

years

log-rank test p-value = 0.031

# Survival by CRISP3 expression

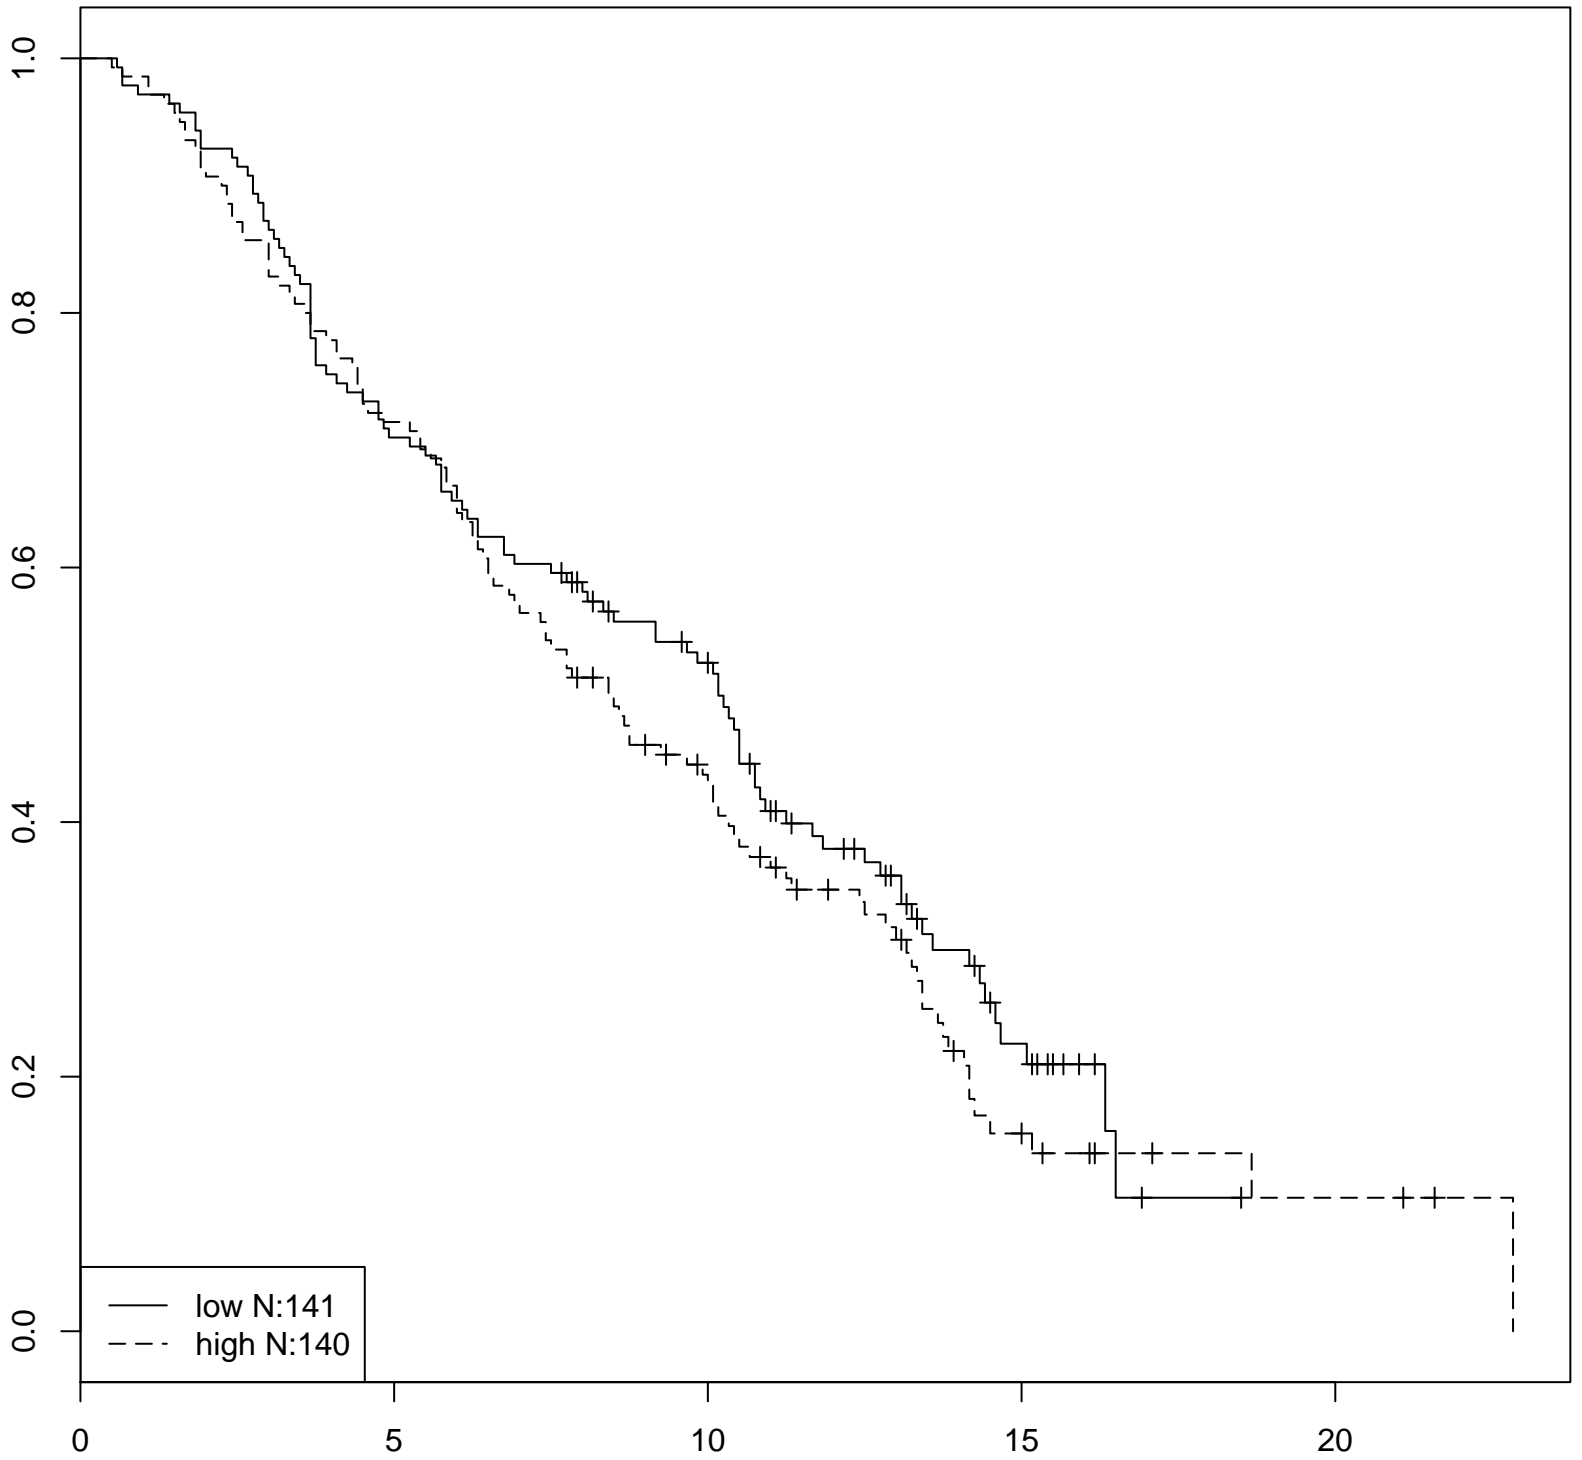

# Survival by CSF1 expression

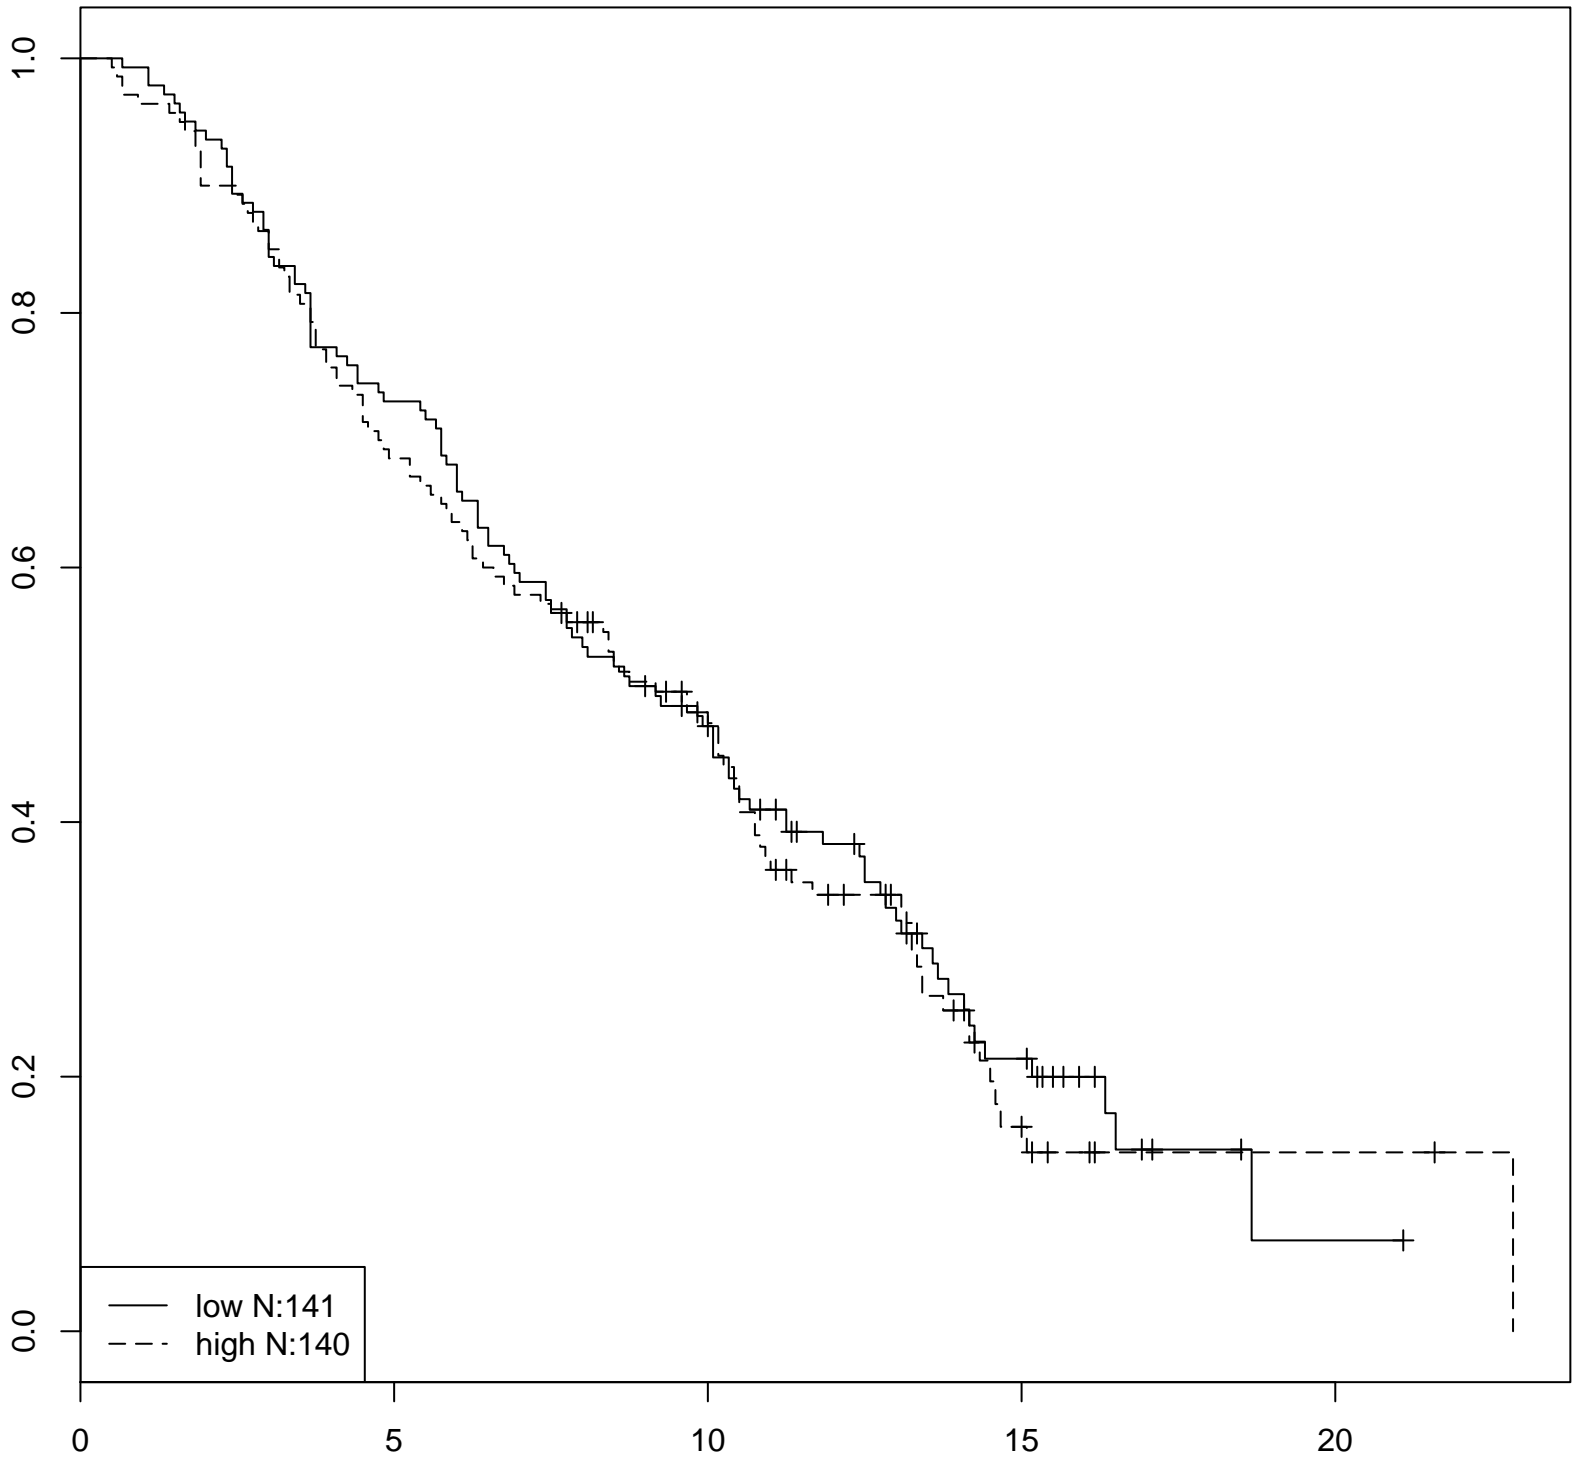

years

log-rank test p-value = 0.714

# Survival by CSF1R expression

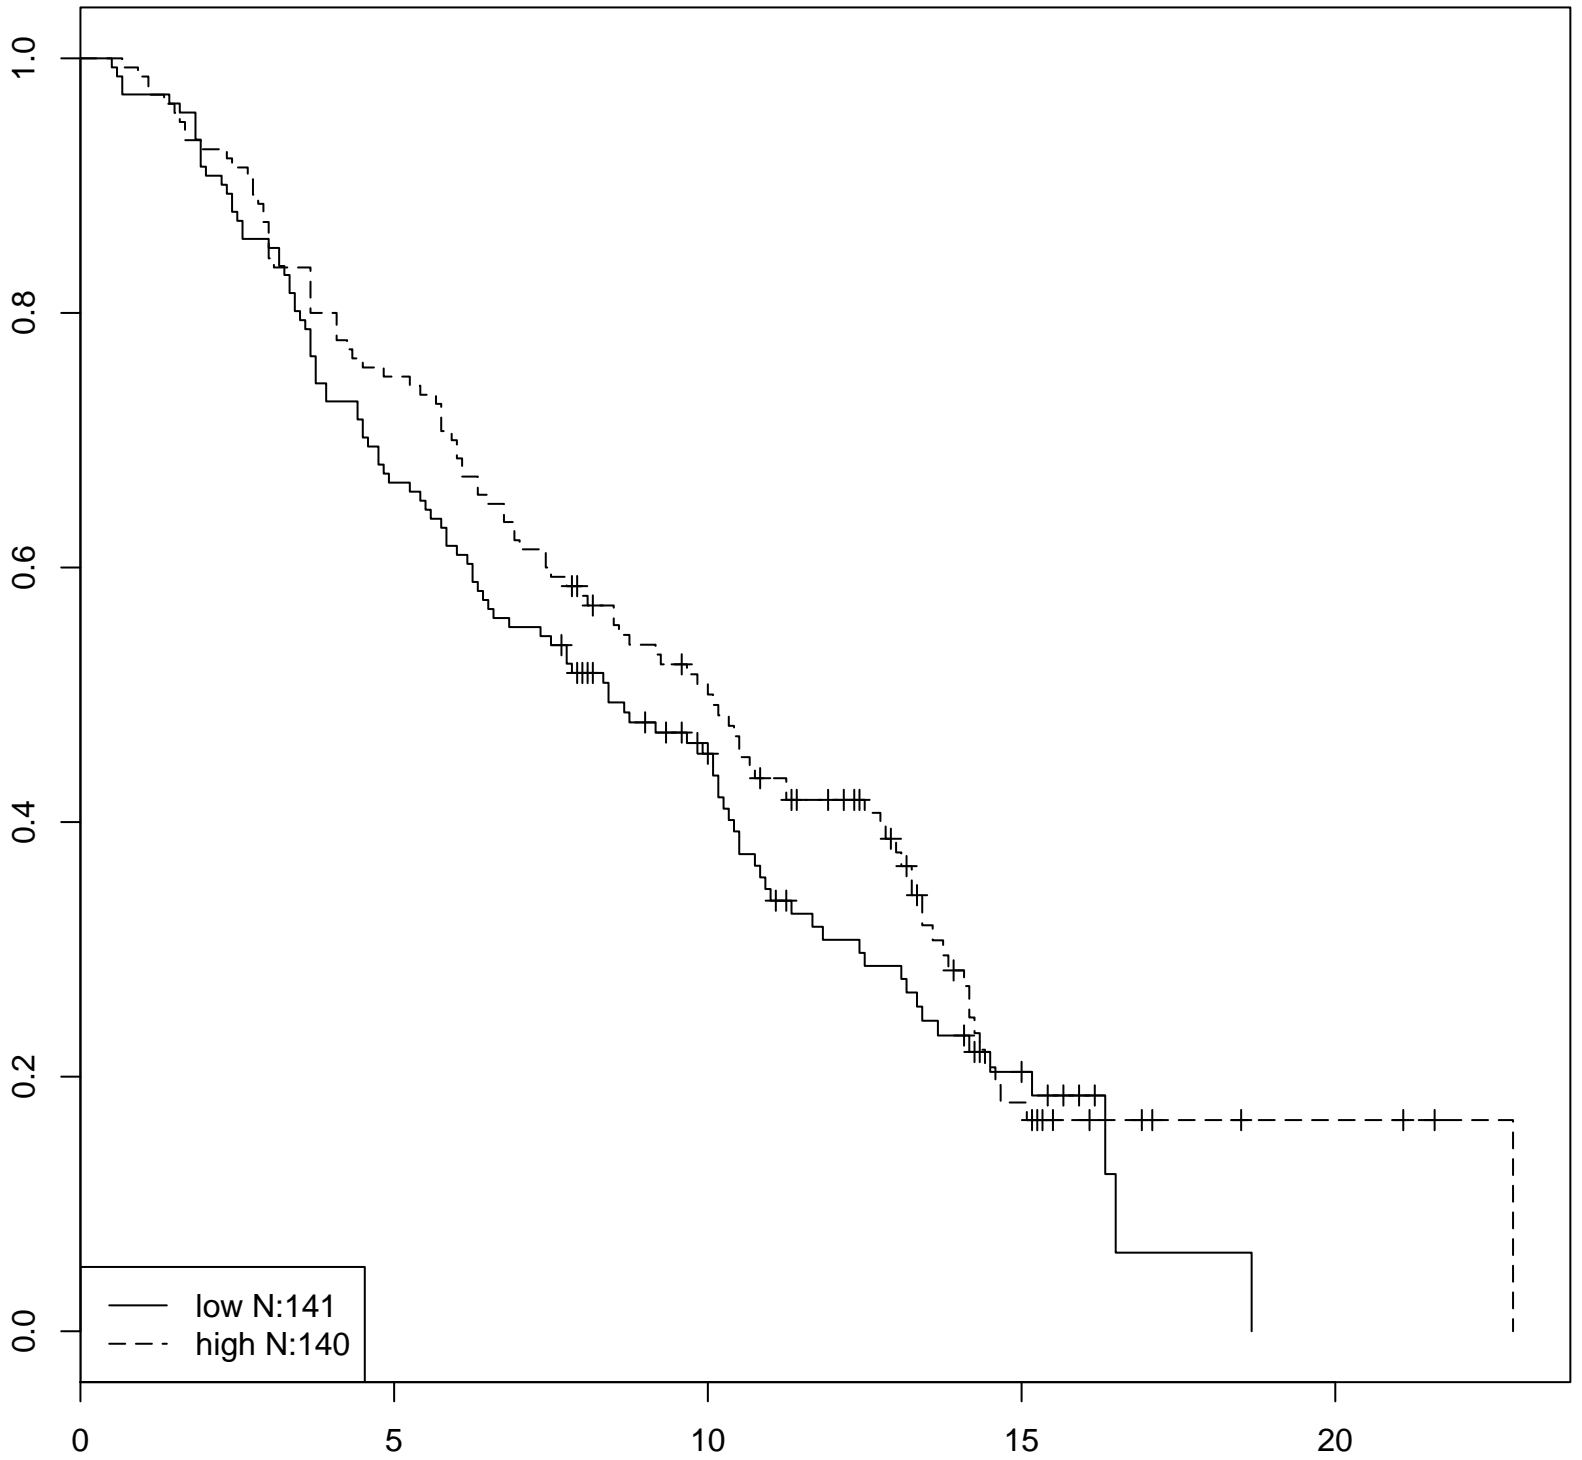

years

log-rank test p-value = 0.204

# Survival by CSF2 expression

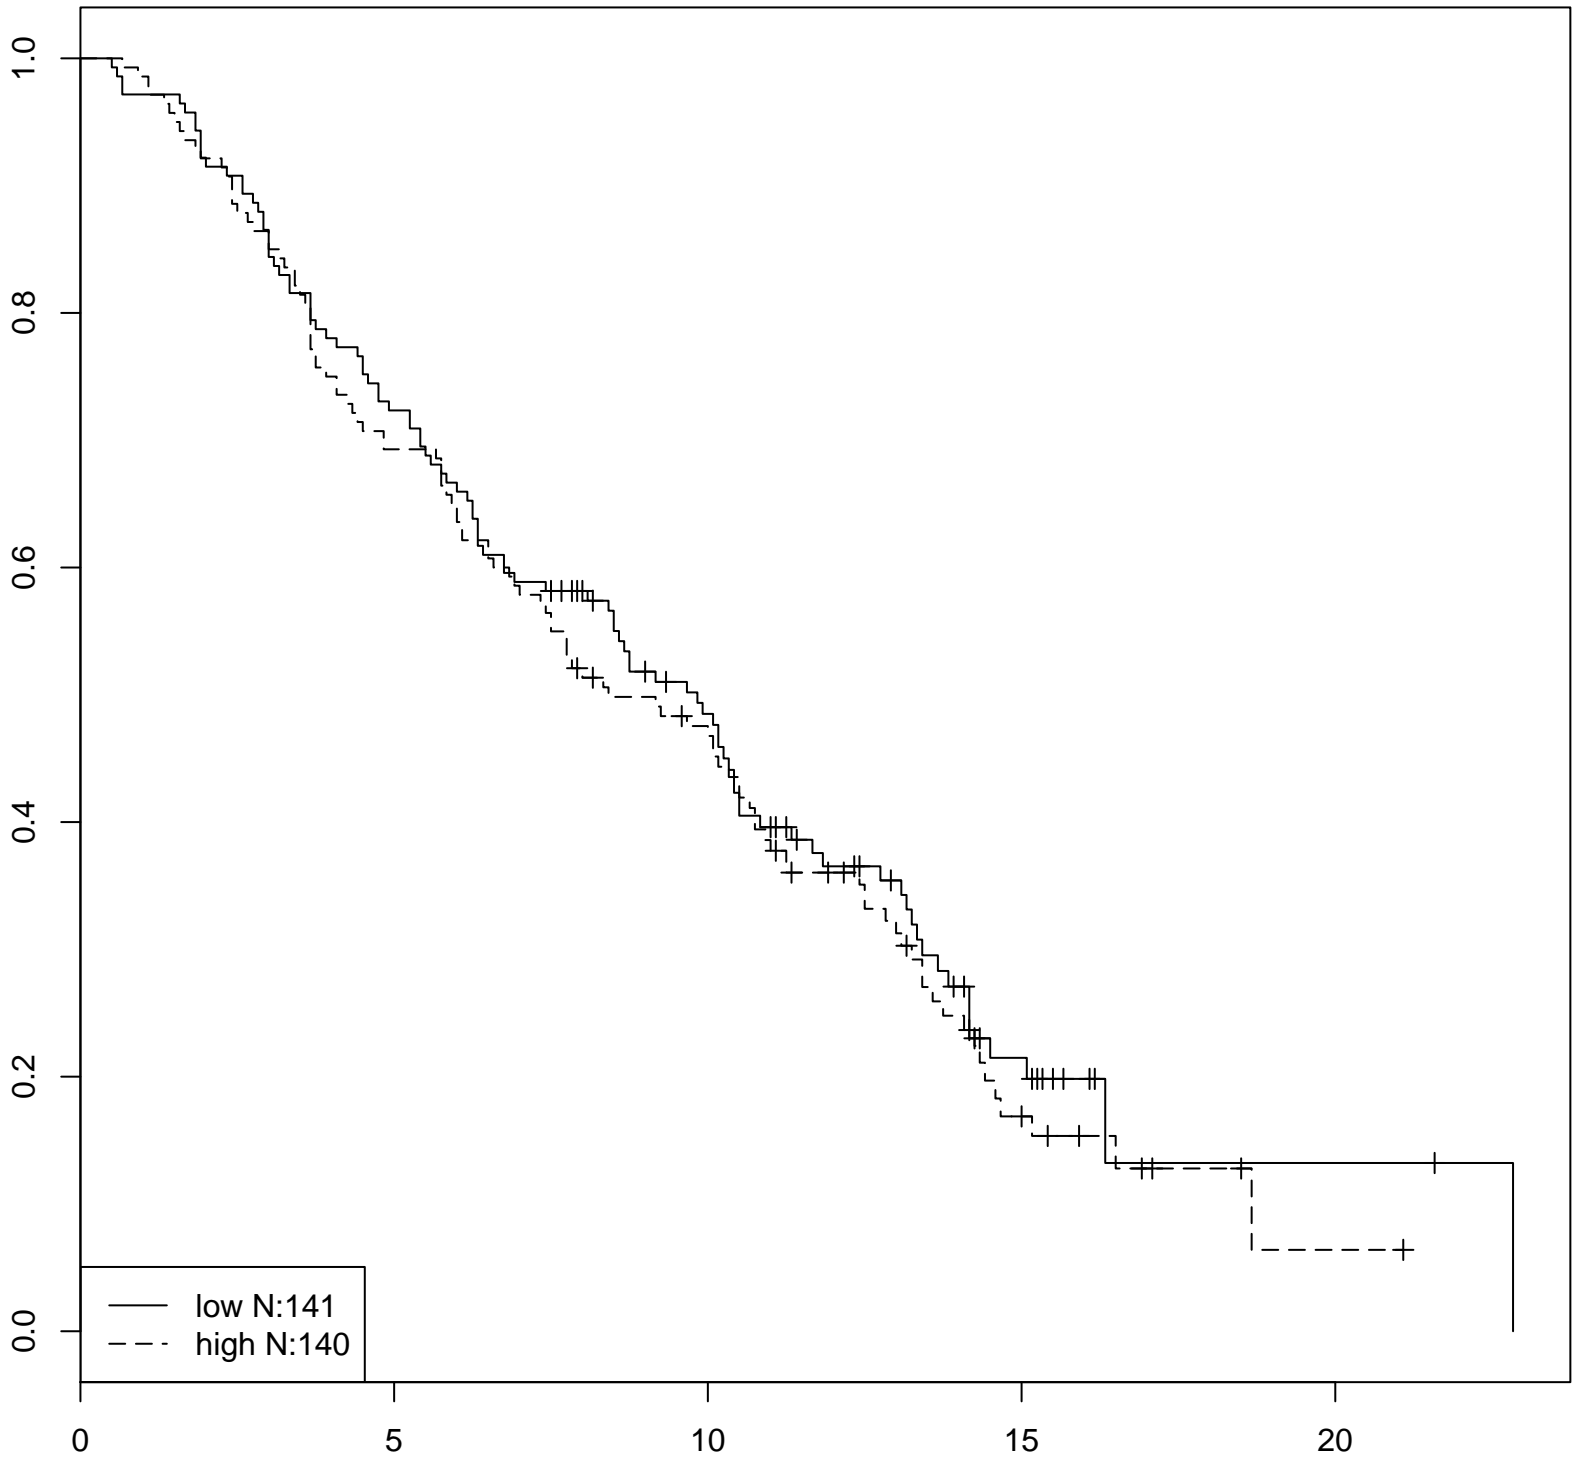



# Survival by CSNK2A1 expression

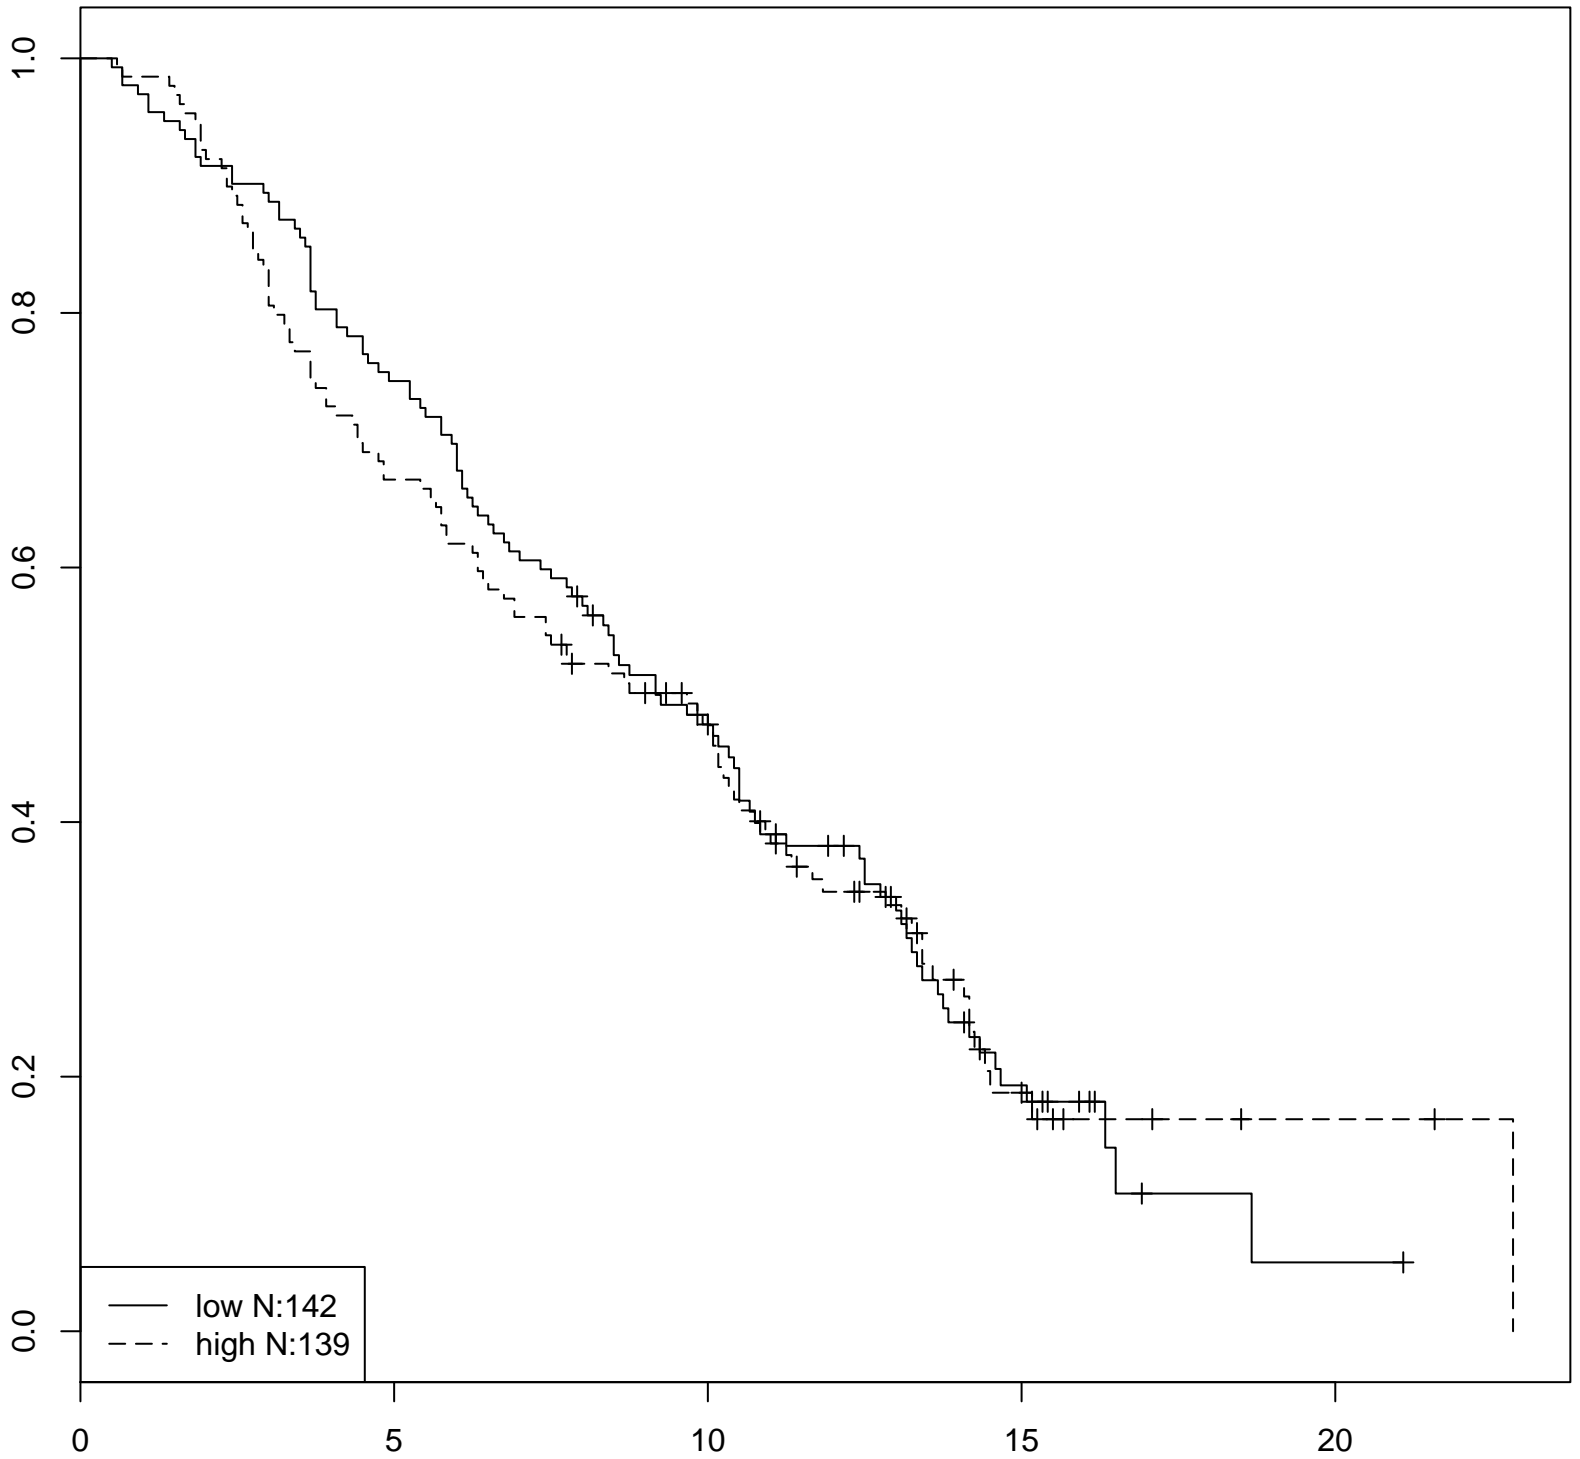

years

log-rank test p-value = 0.827

# Survival by CSTA expression

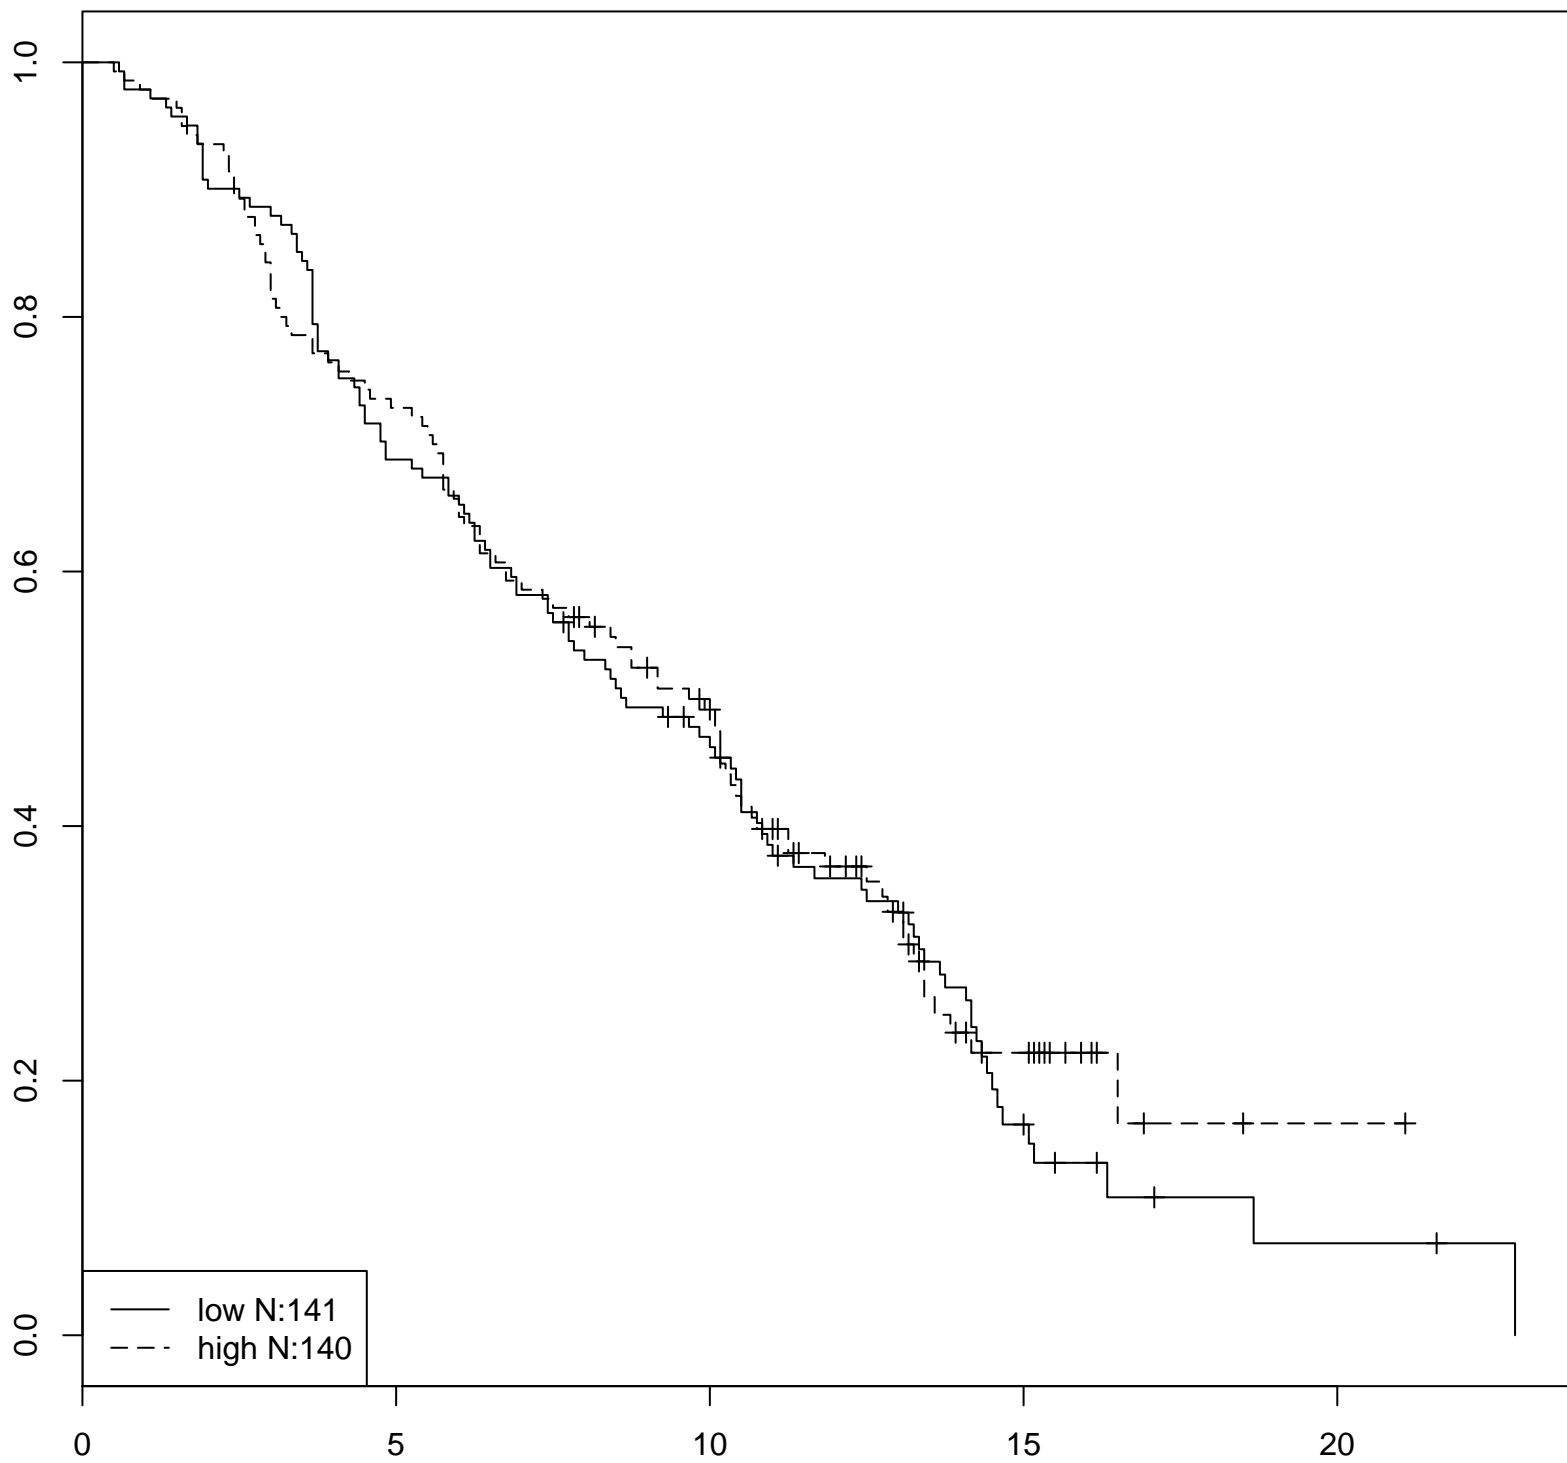

# Survival by CSTB expression

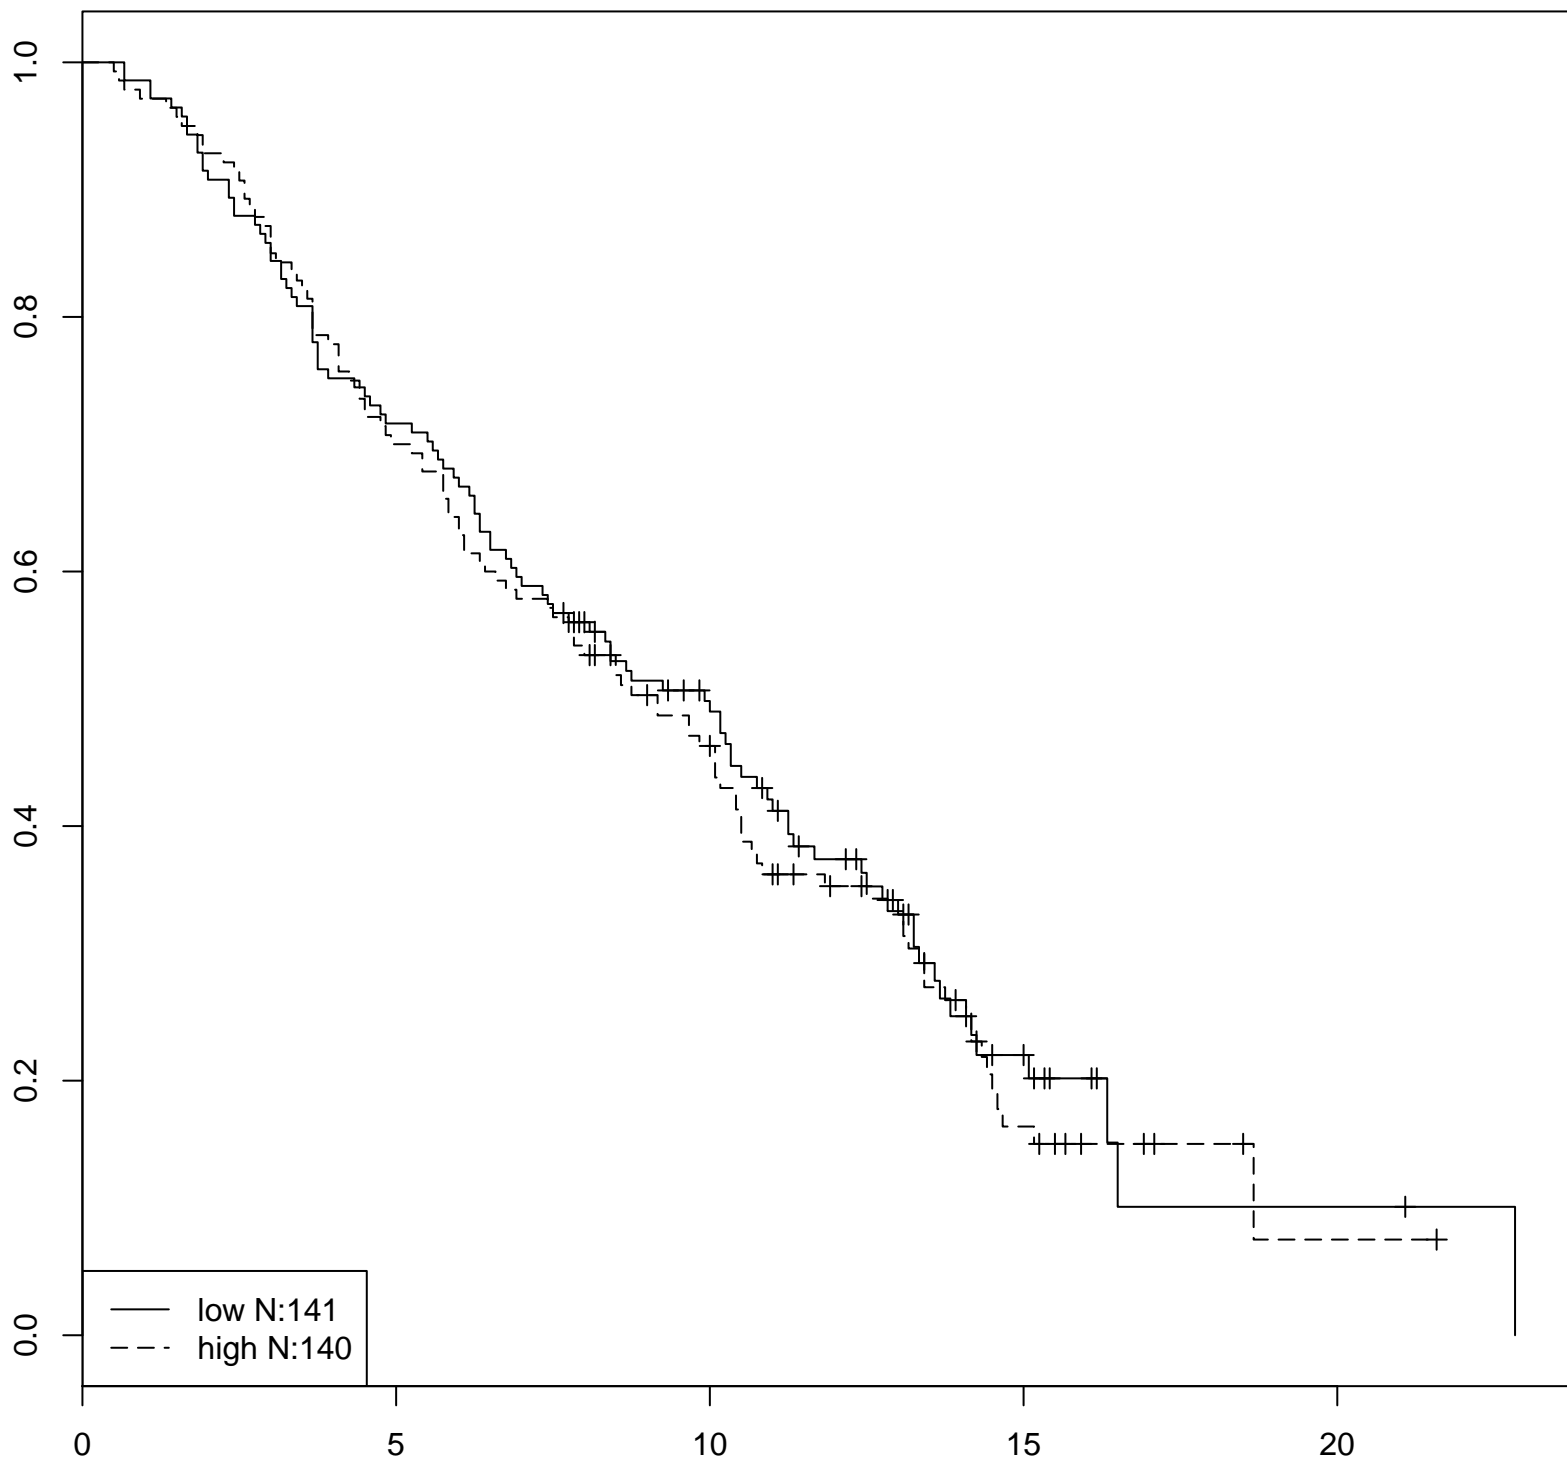

years

log-rank test p-value = 0.677

# Survival by CTNNB1 expression

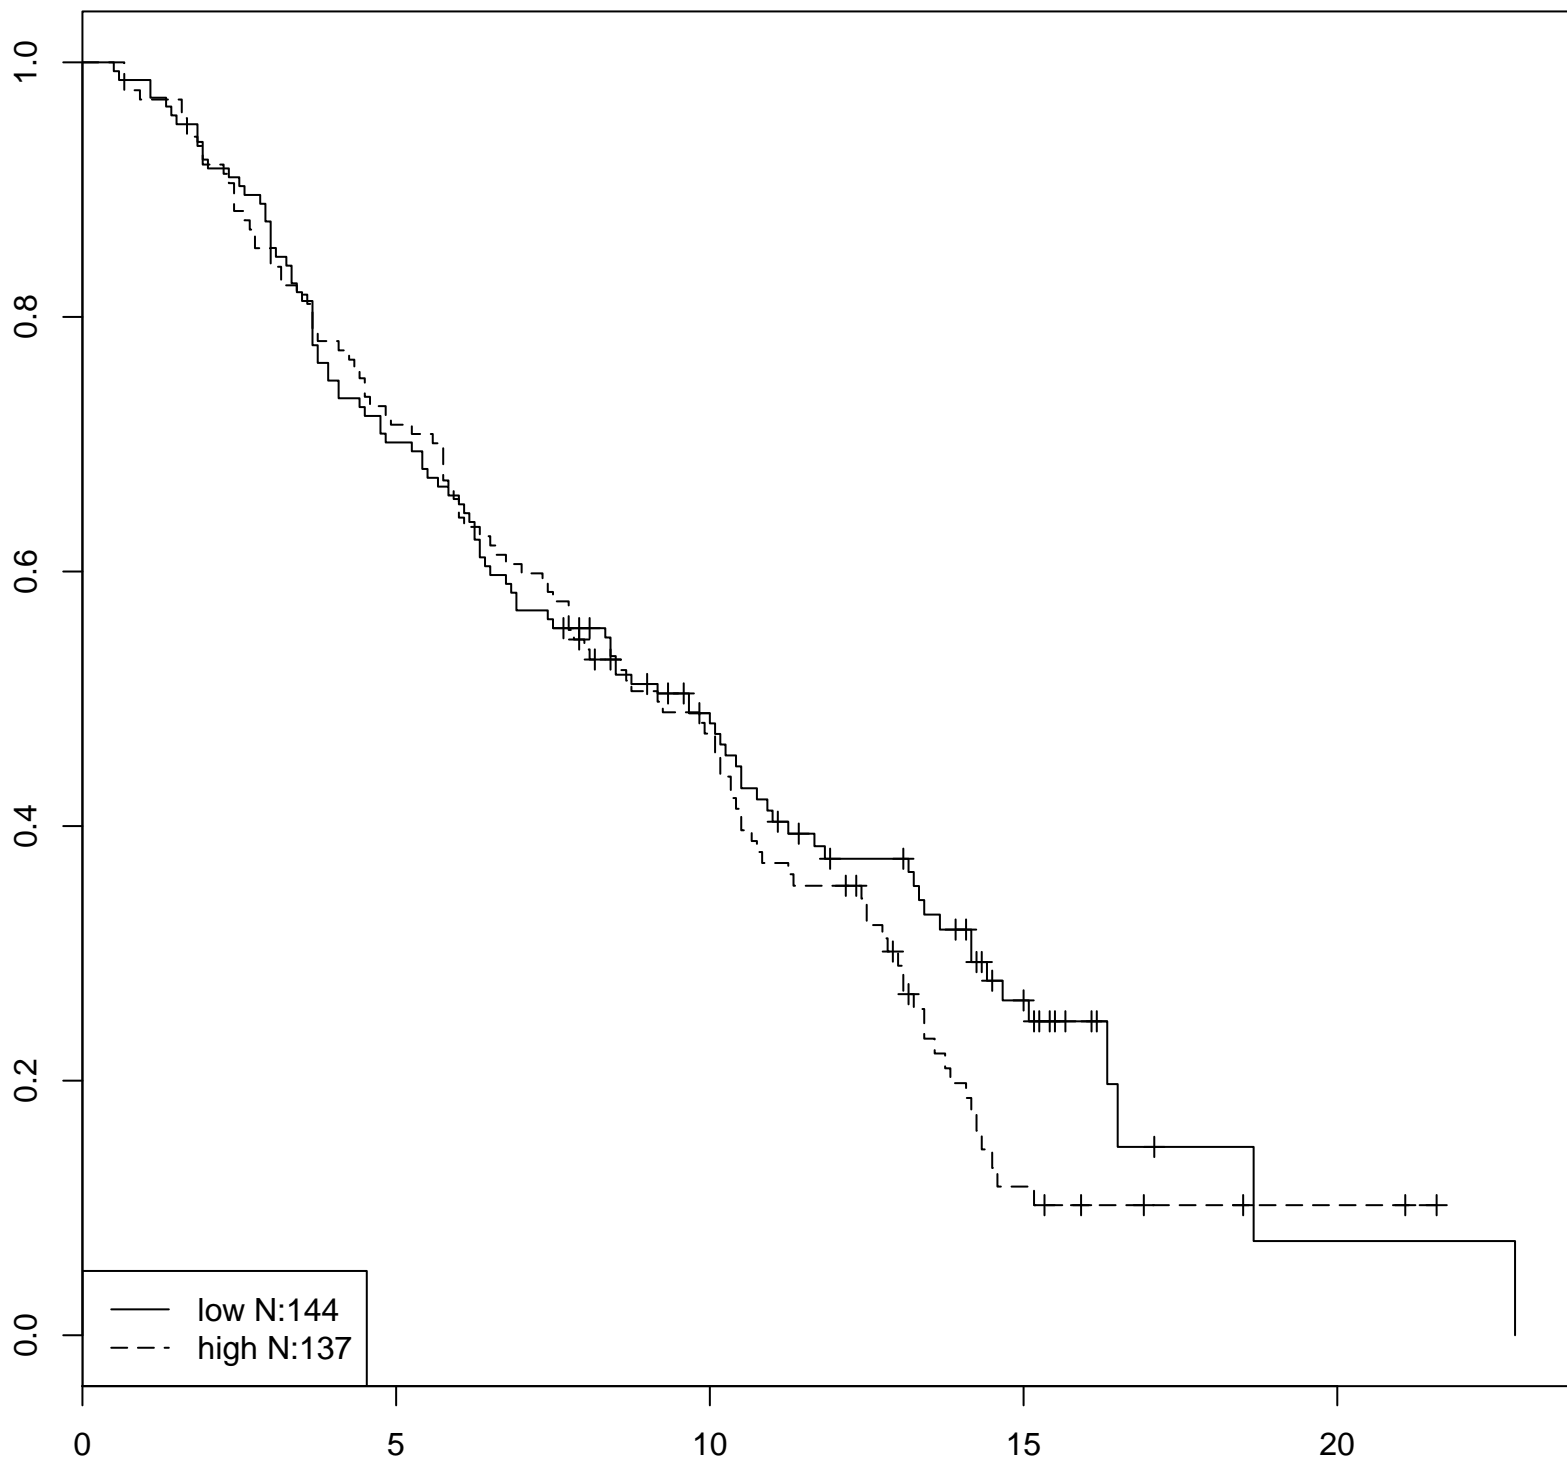

years  
log-rank test p-value = 0.209

# Survival by CXCL12 expression

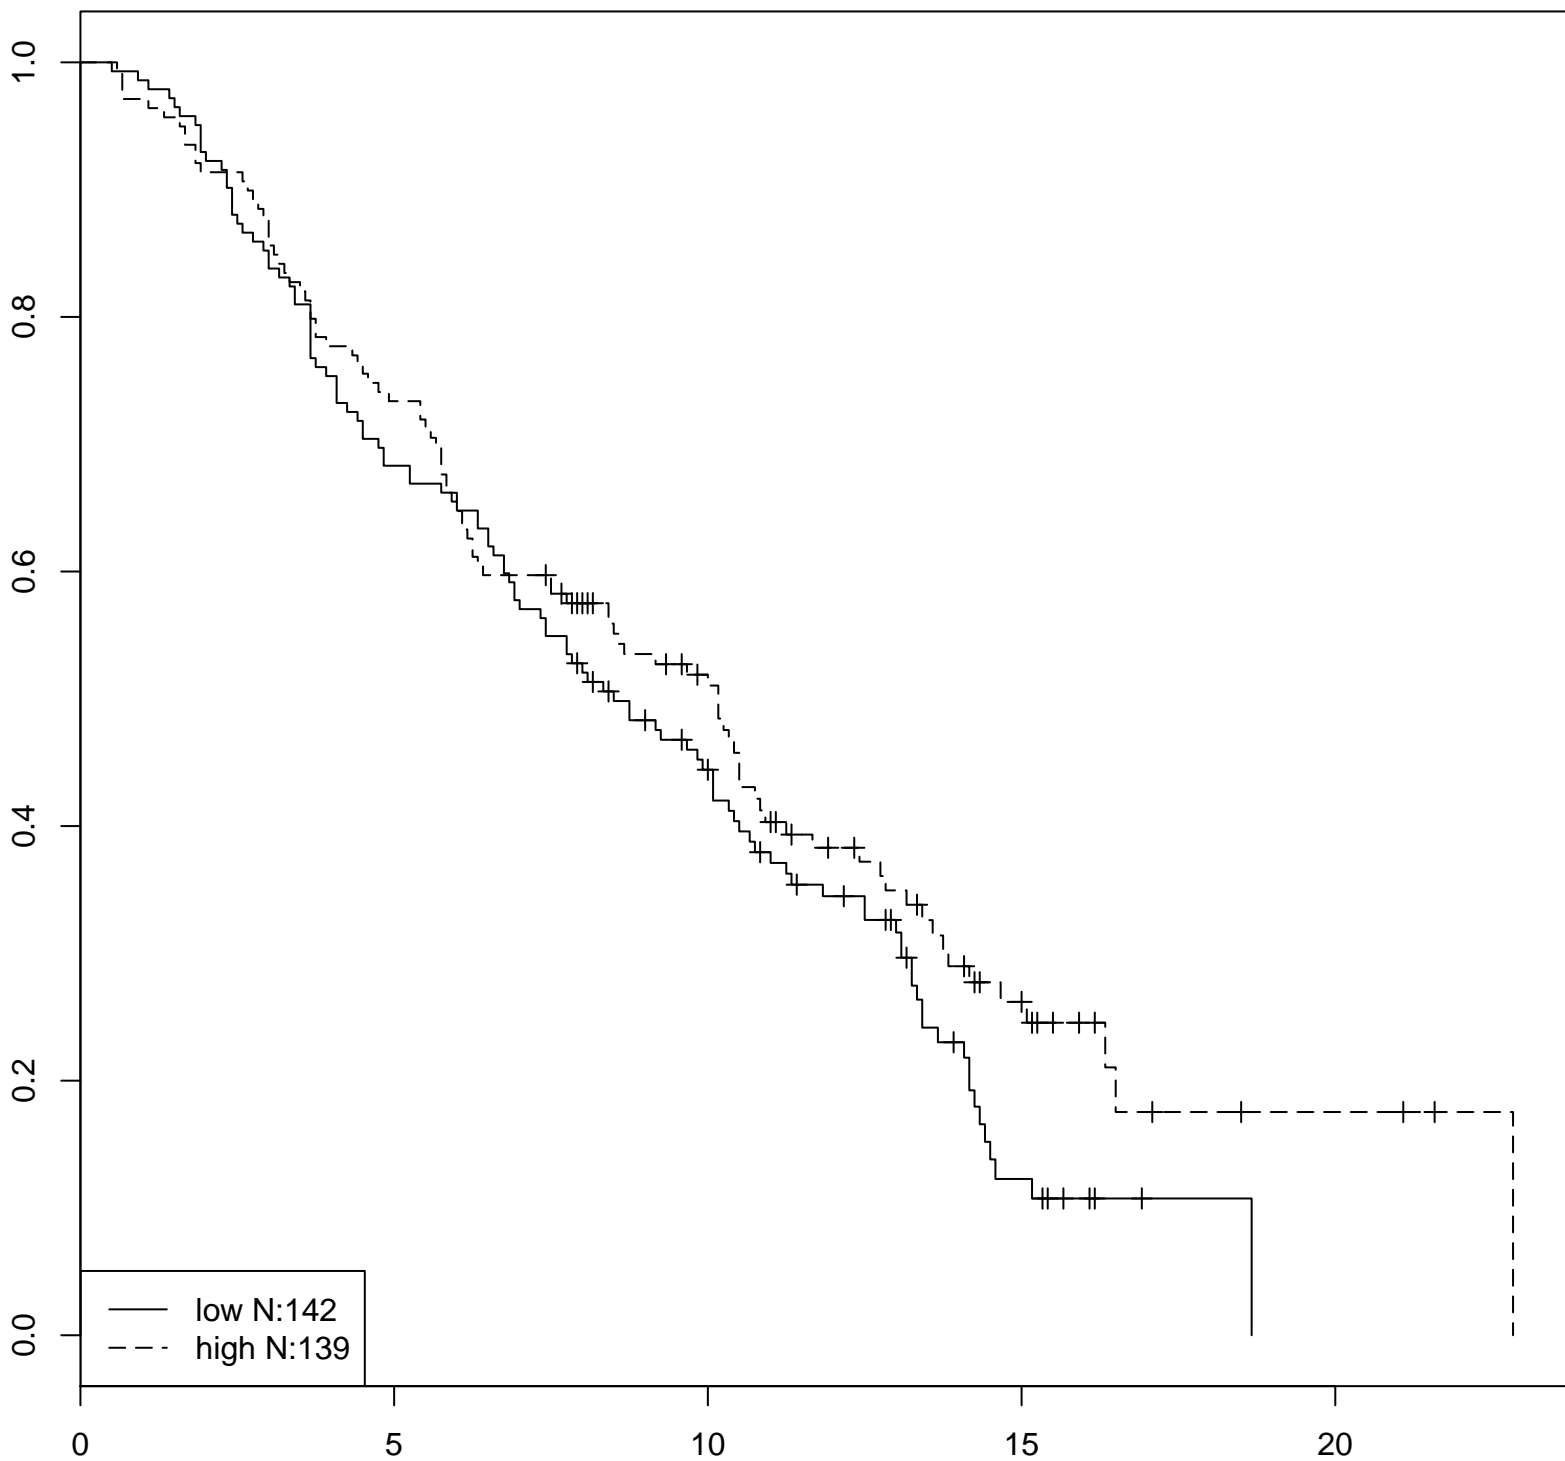

log-rank test p-value = 0.116

# Survival by CYP11A1 expression

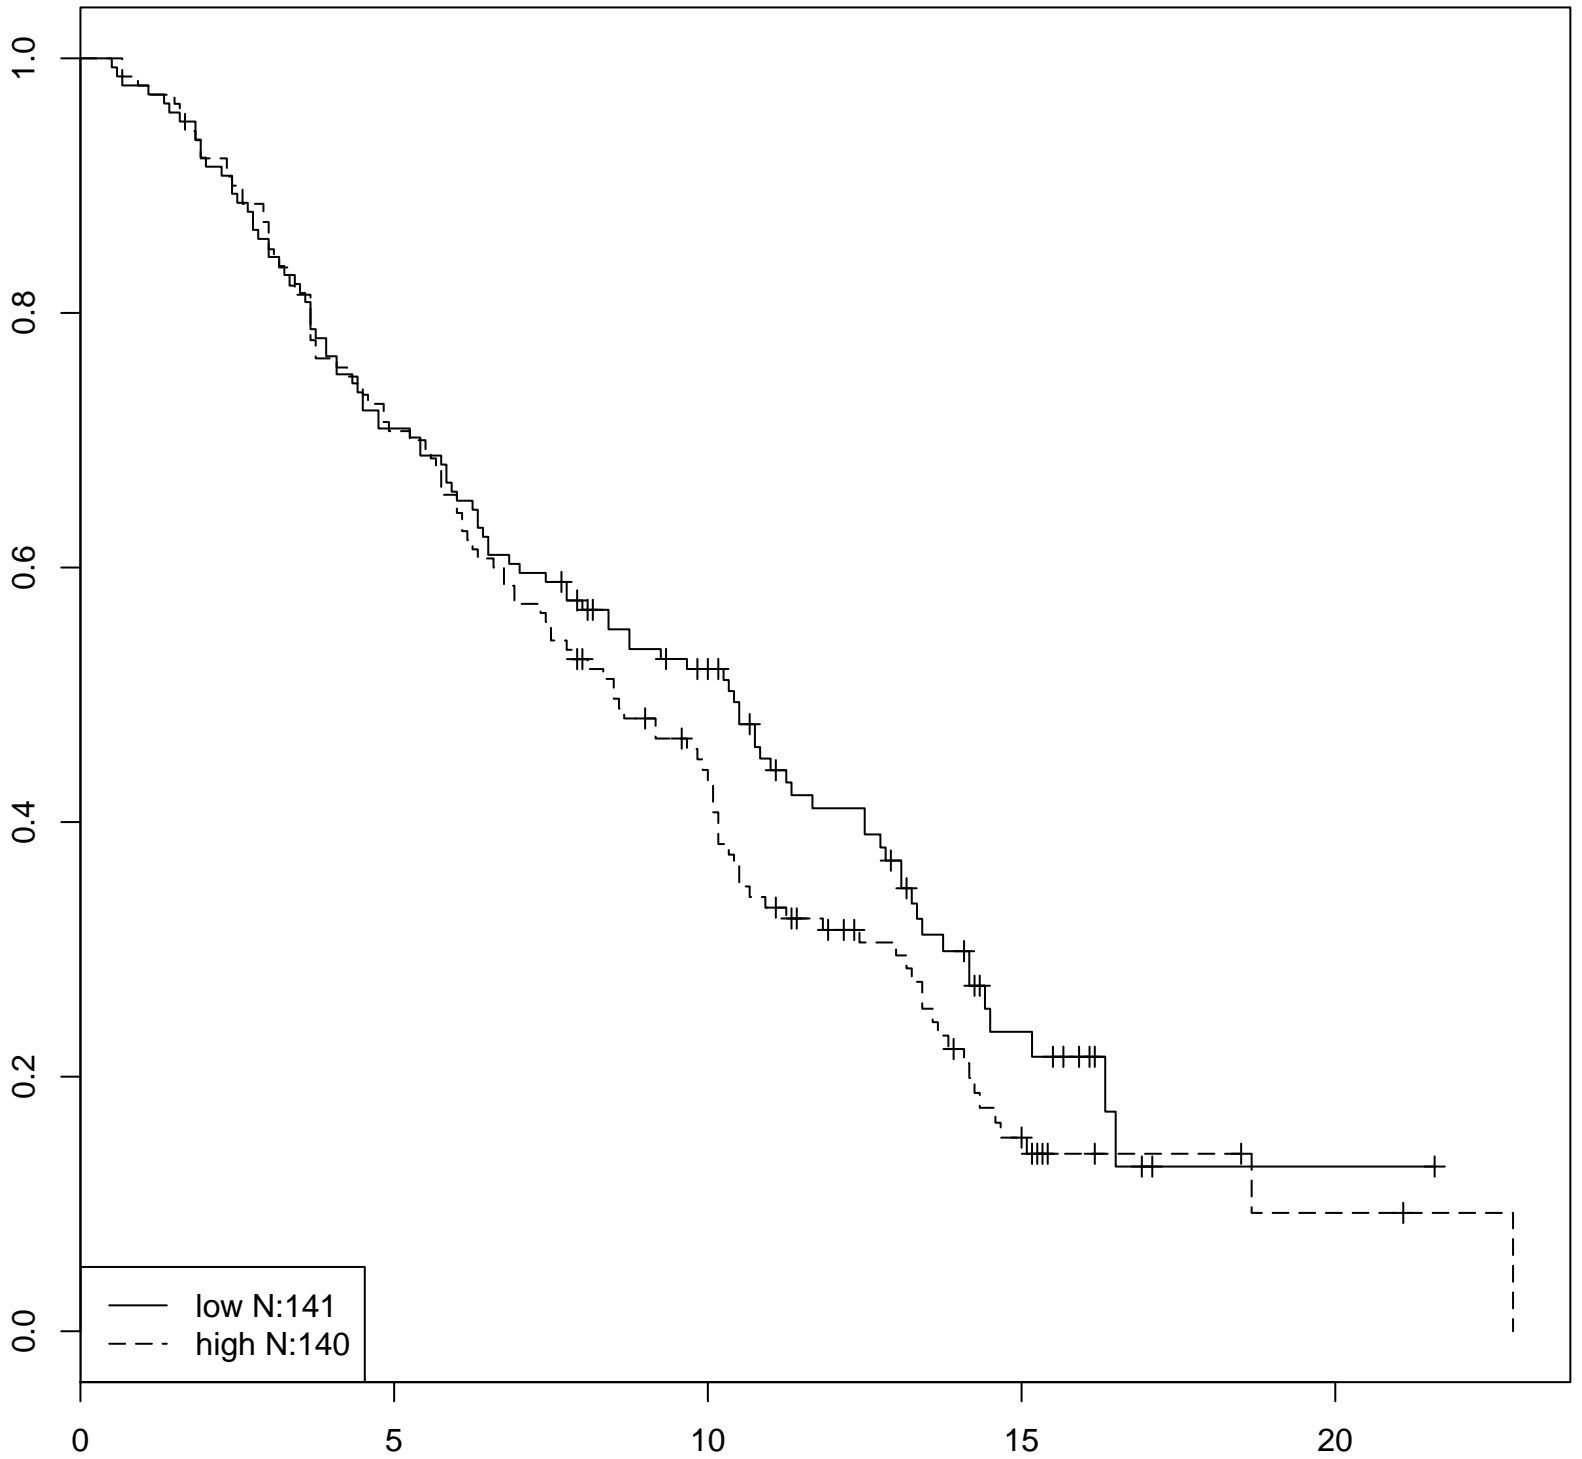

# Survival by CYP17A1 expression

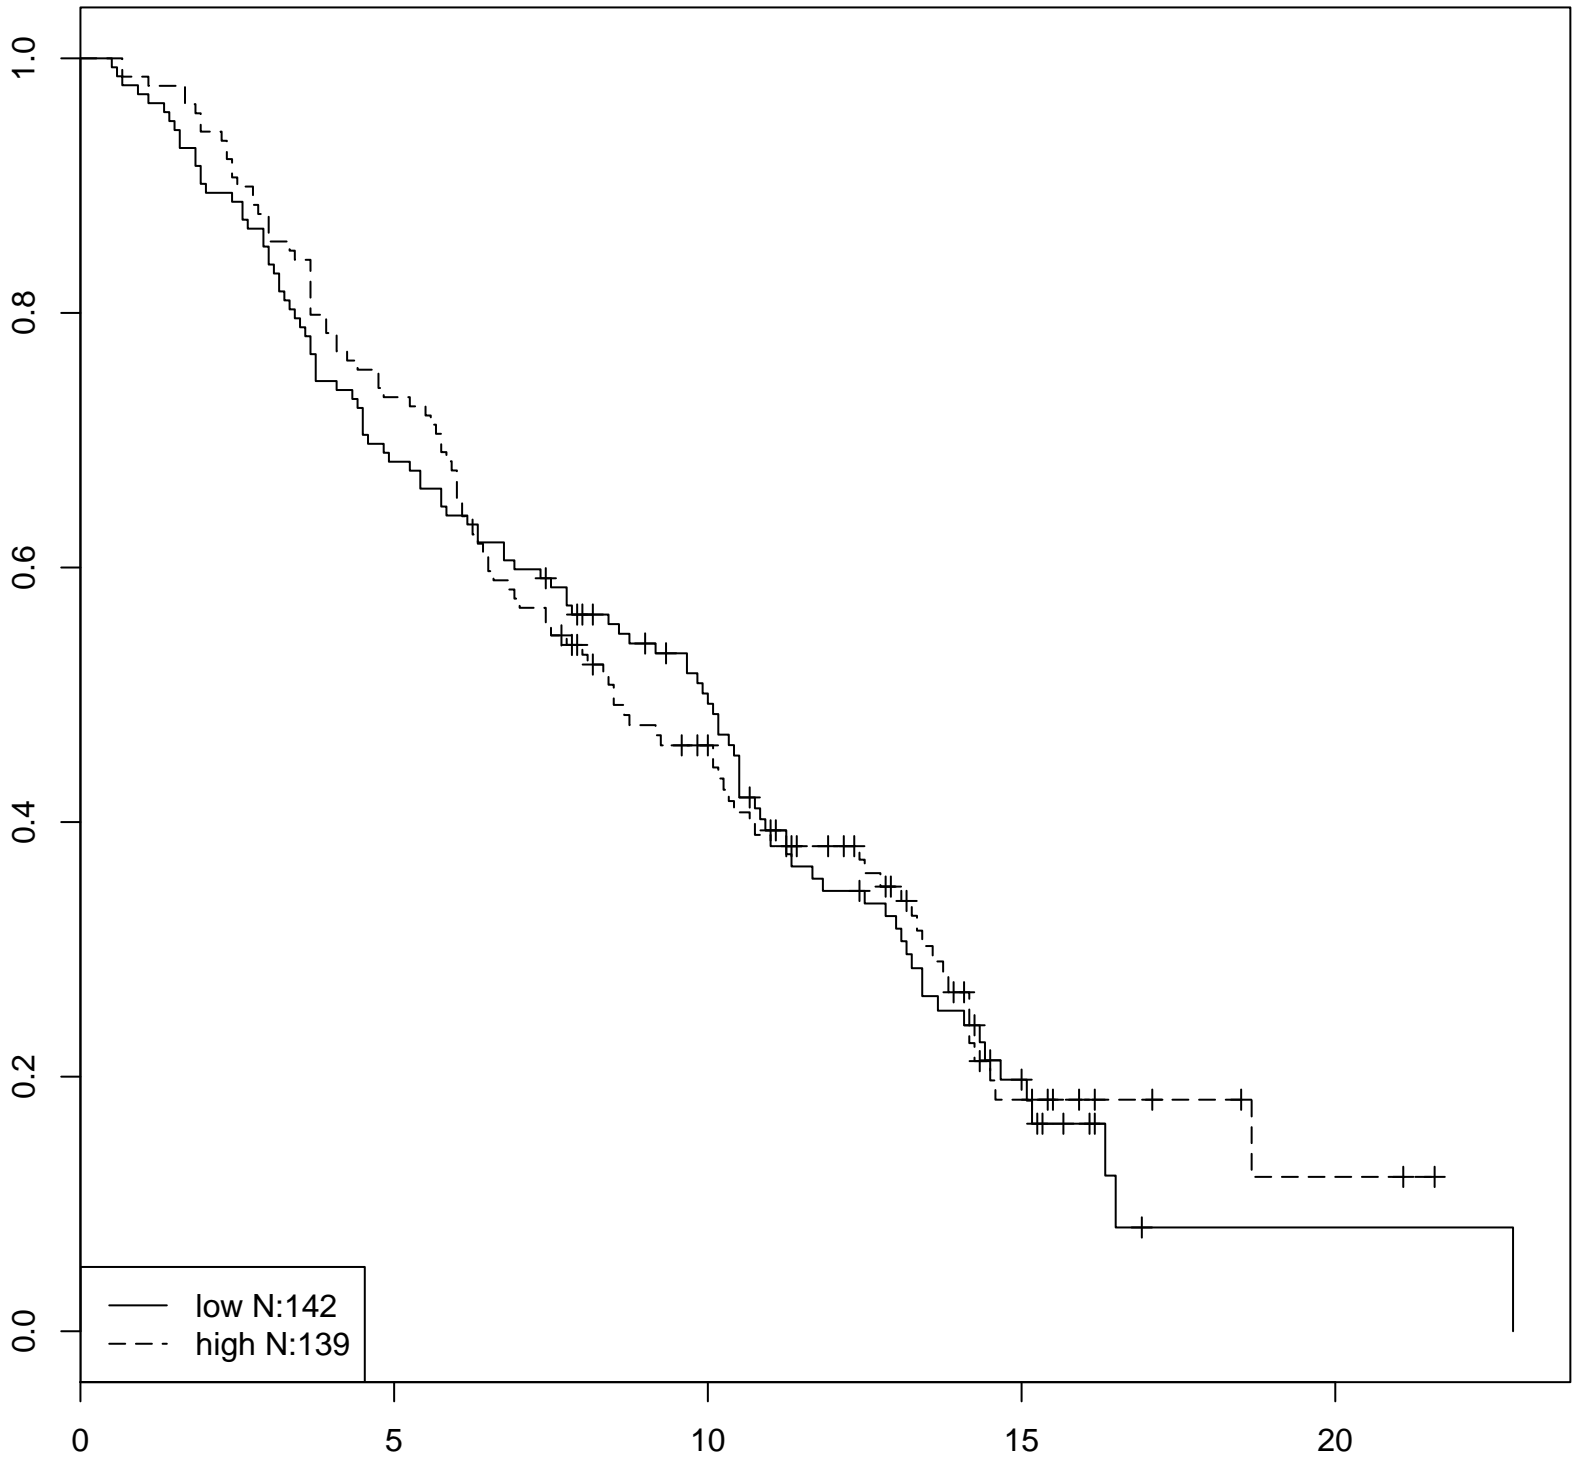

years

log-rank test p-value = 0.811

# Survival by CYP1B1 expression

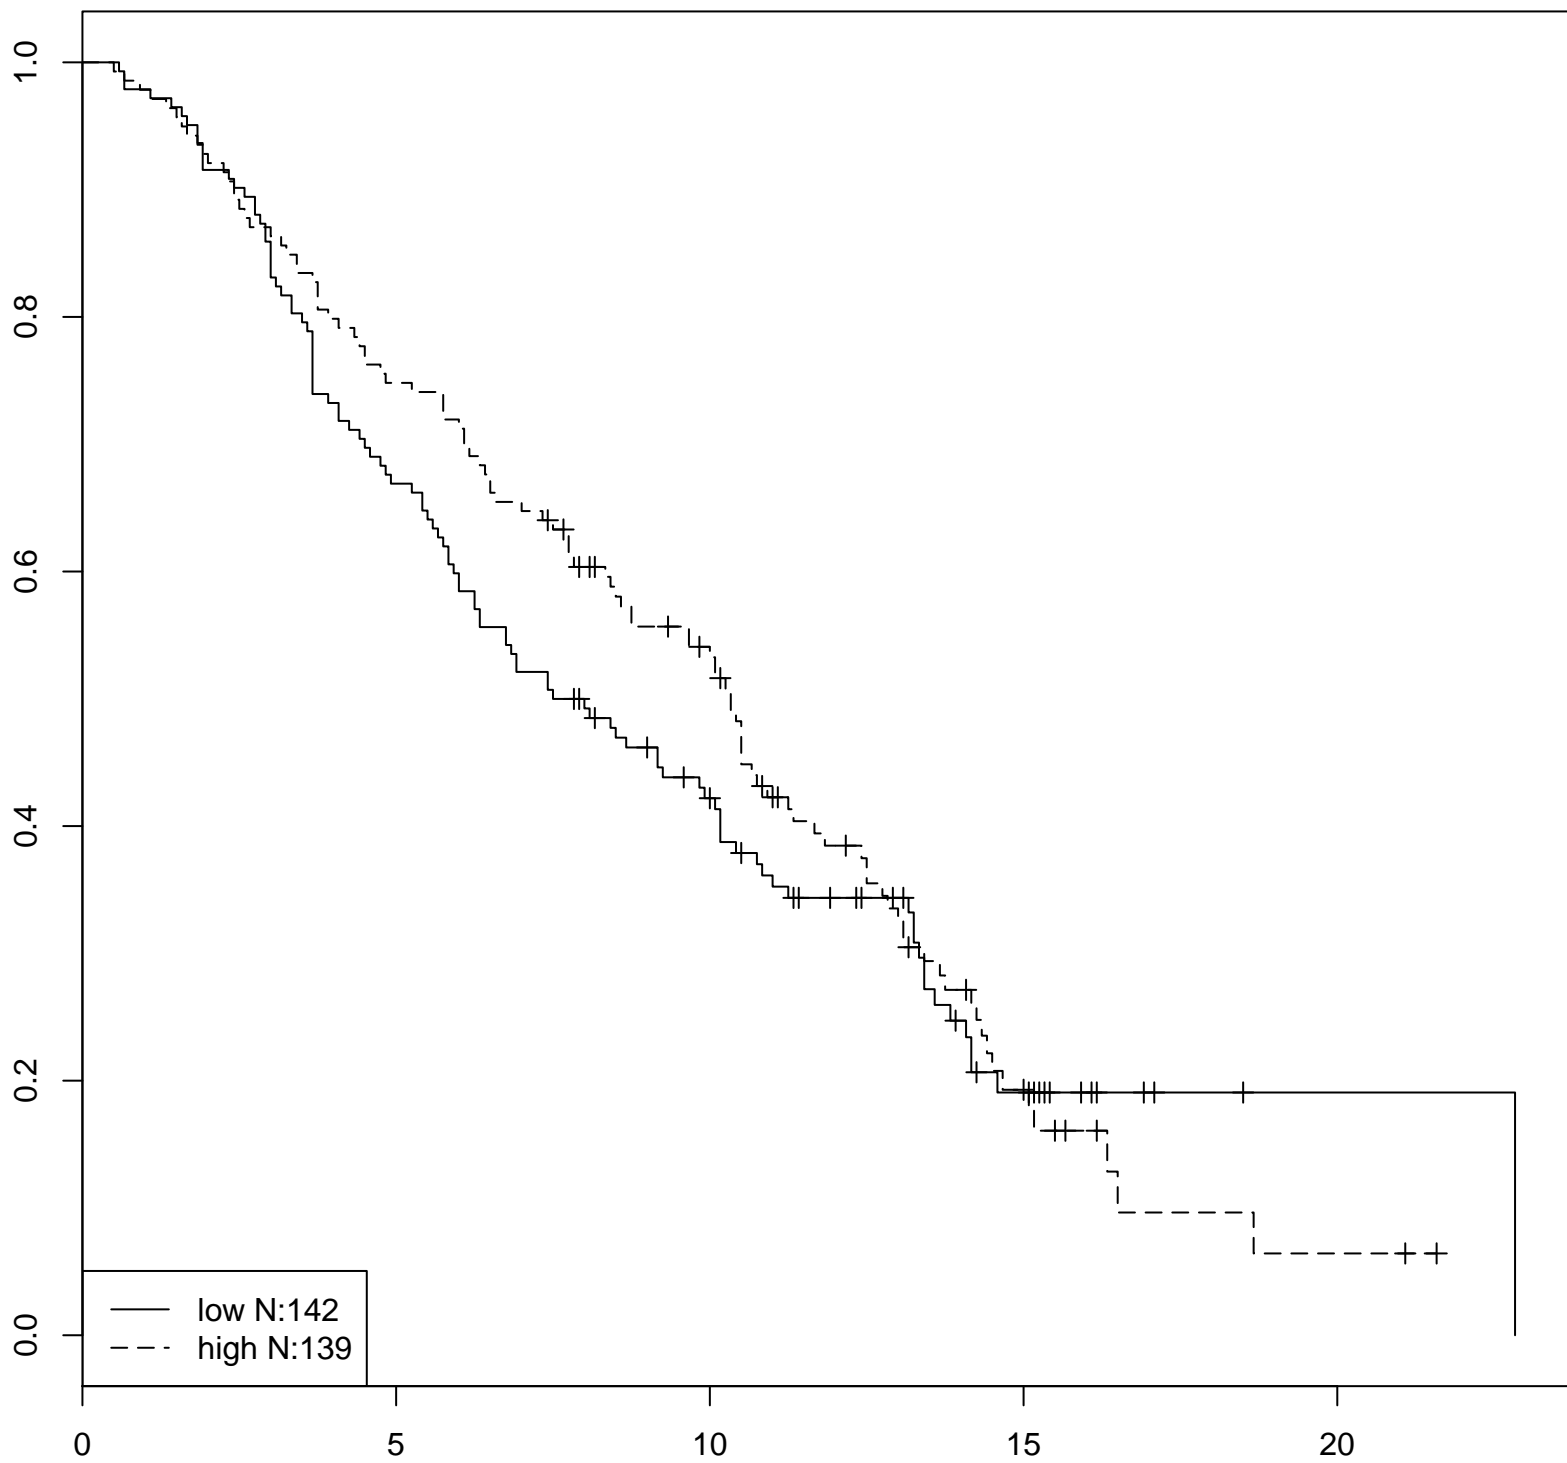

years

log-rank test p-value = 0.44



# Survival by CYR61 expression

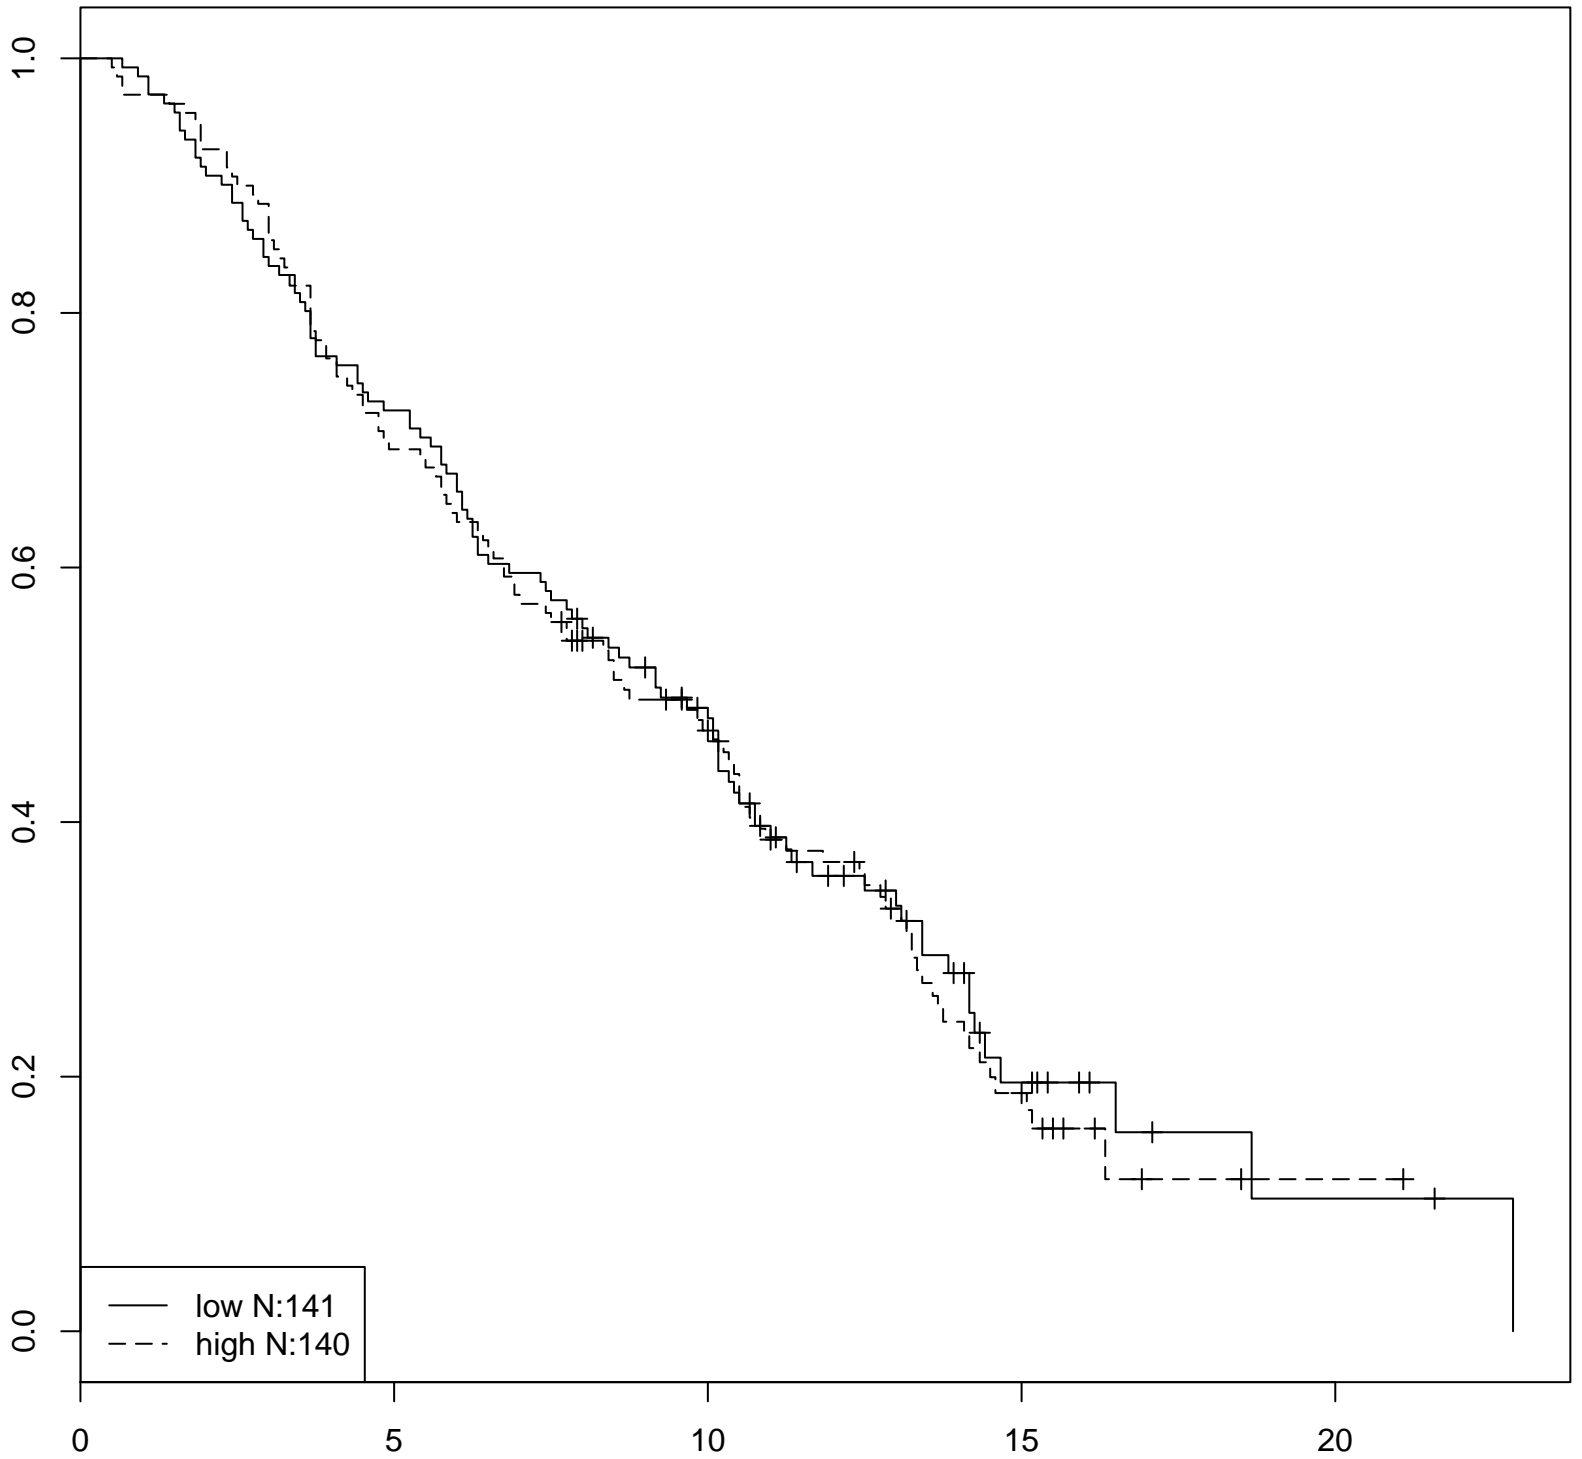

years  
log-rank test p-value = 0.766

# Survival by DCXR expression

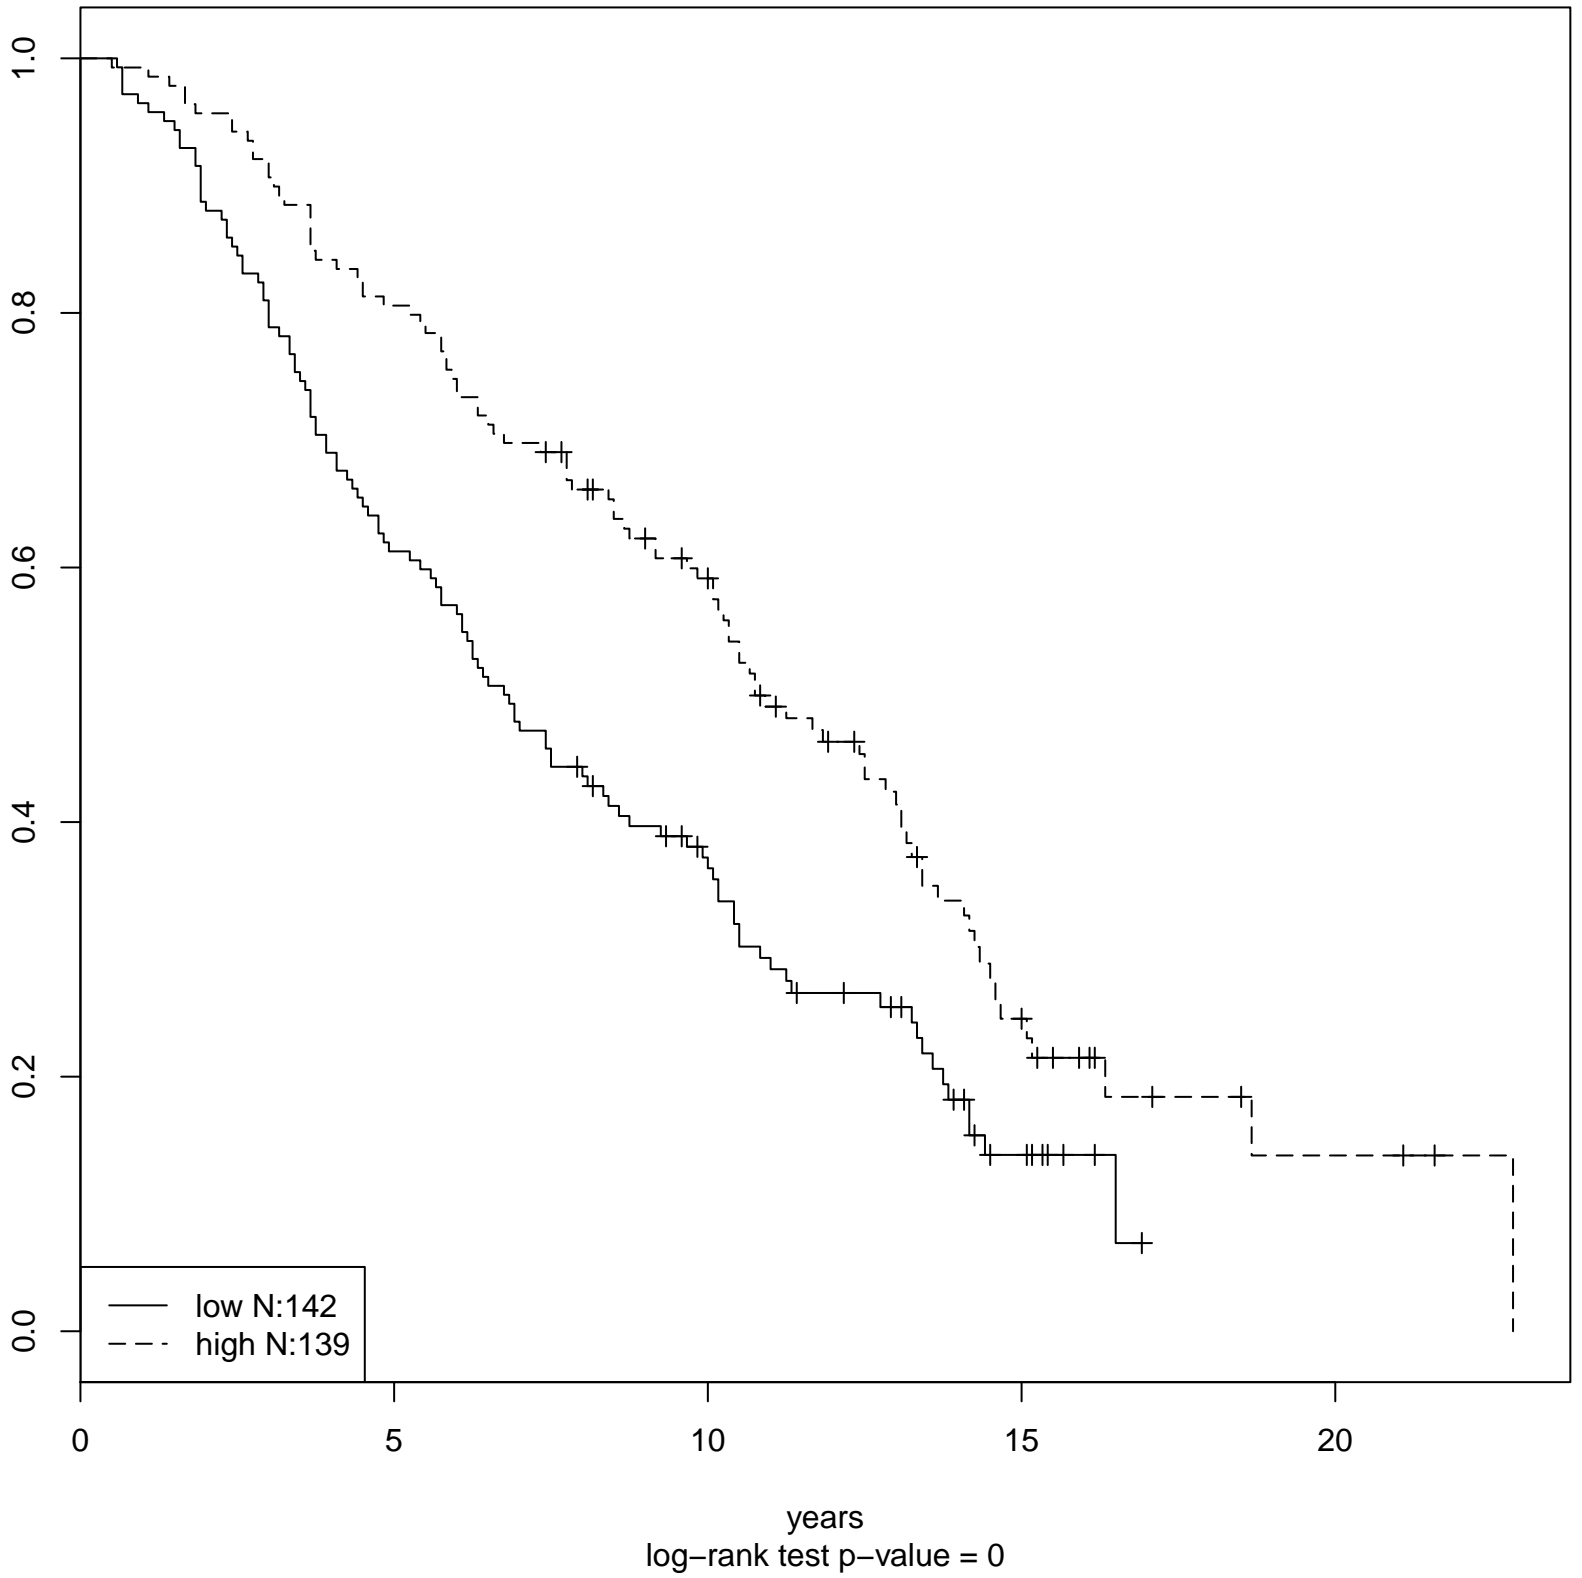

# Survival by DHCR24 expression

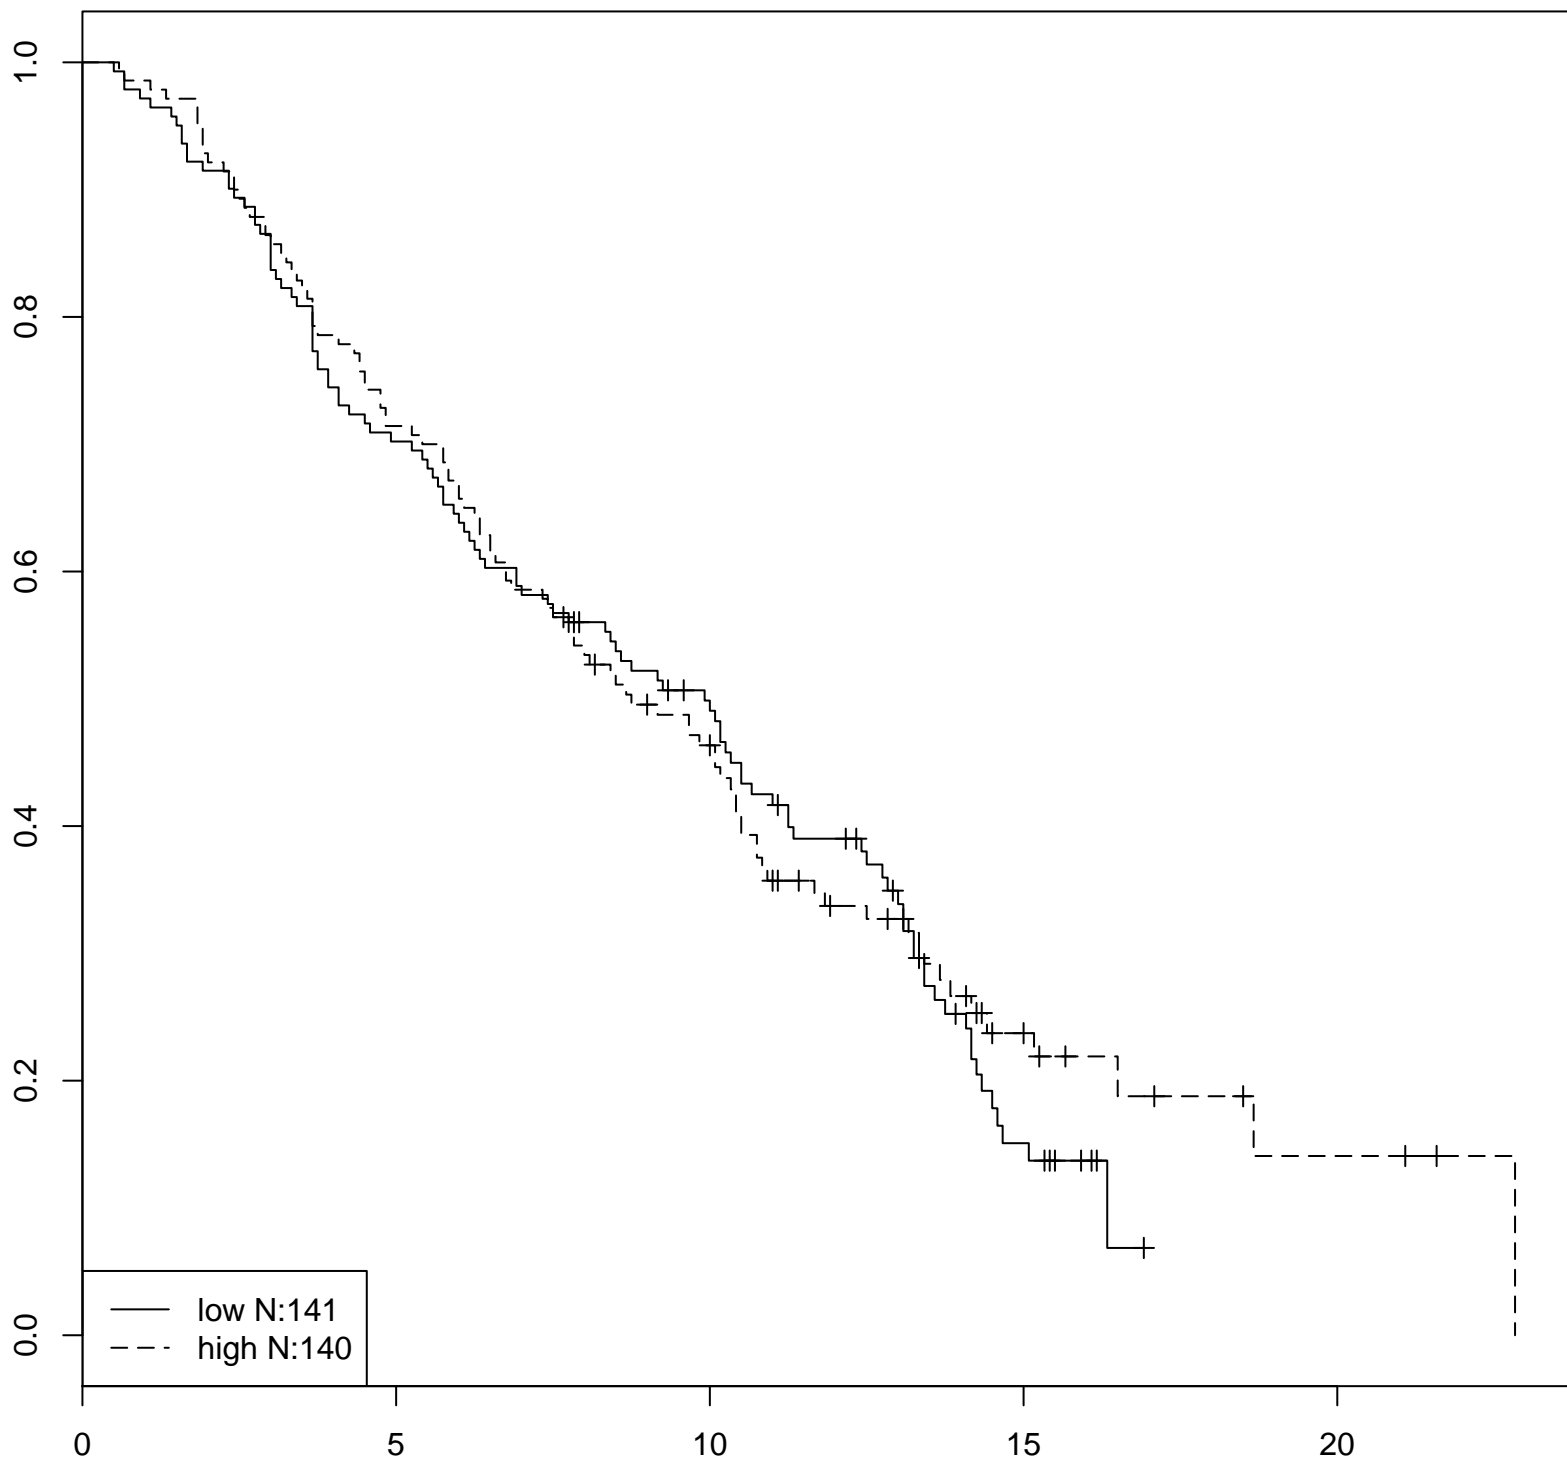

years

log-rank test p-value = 0.62

# Survival by DKK1 expression

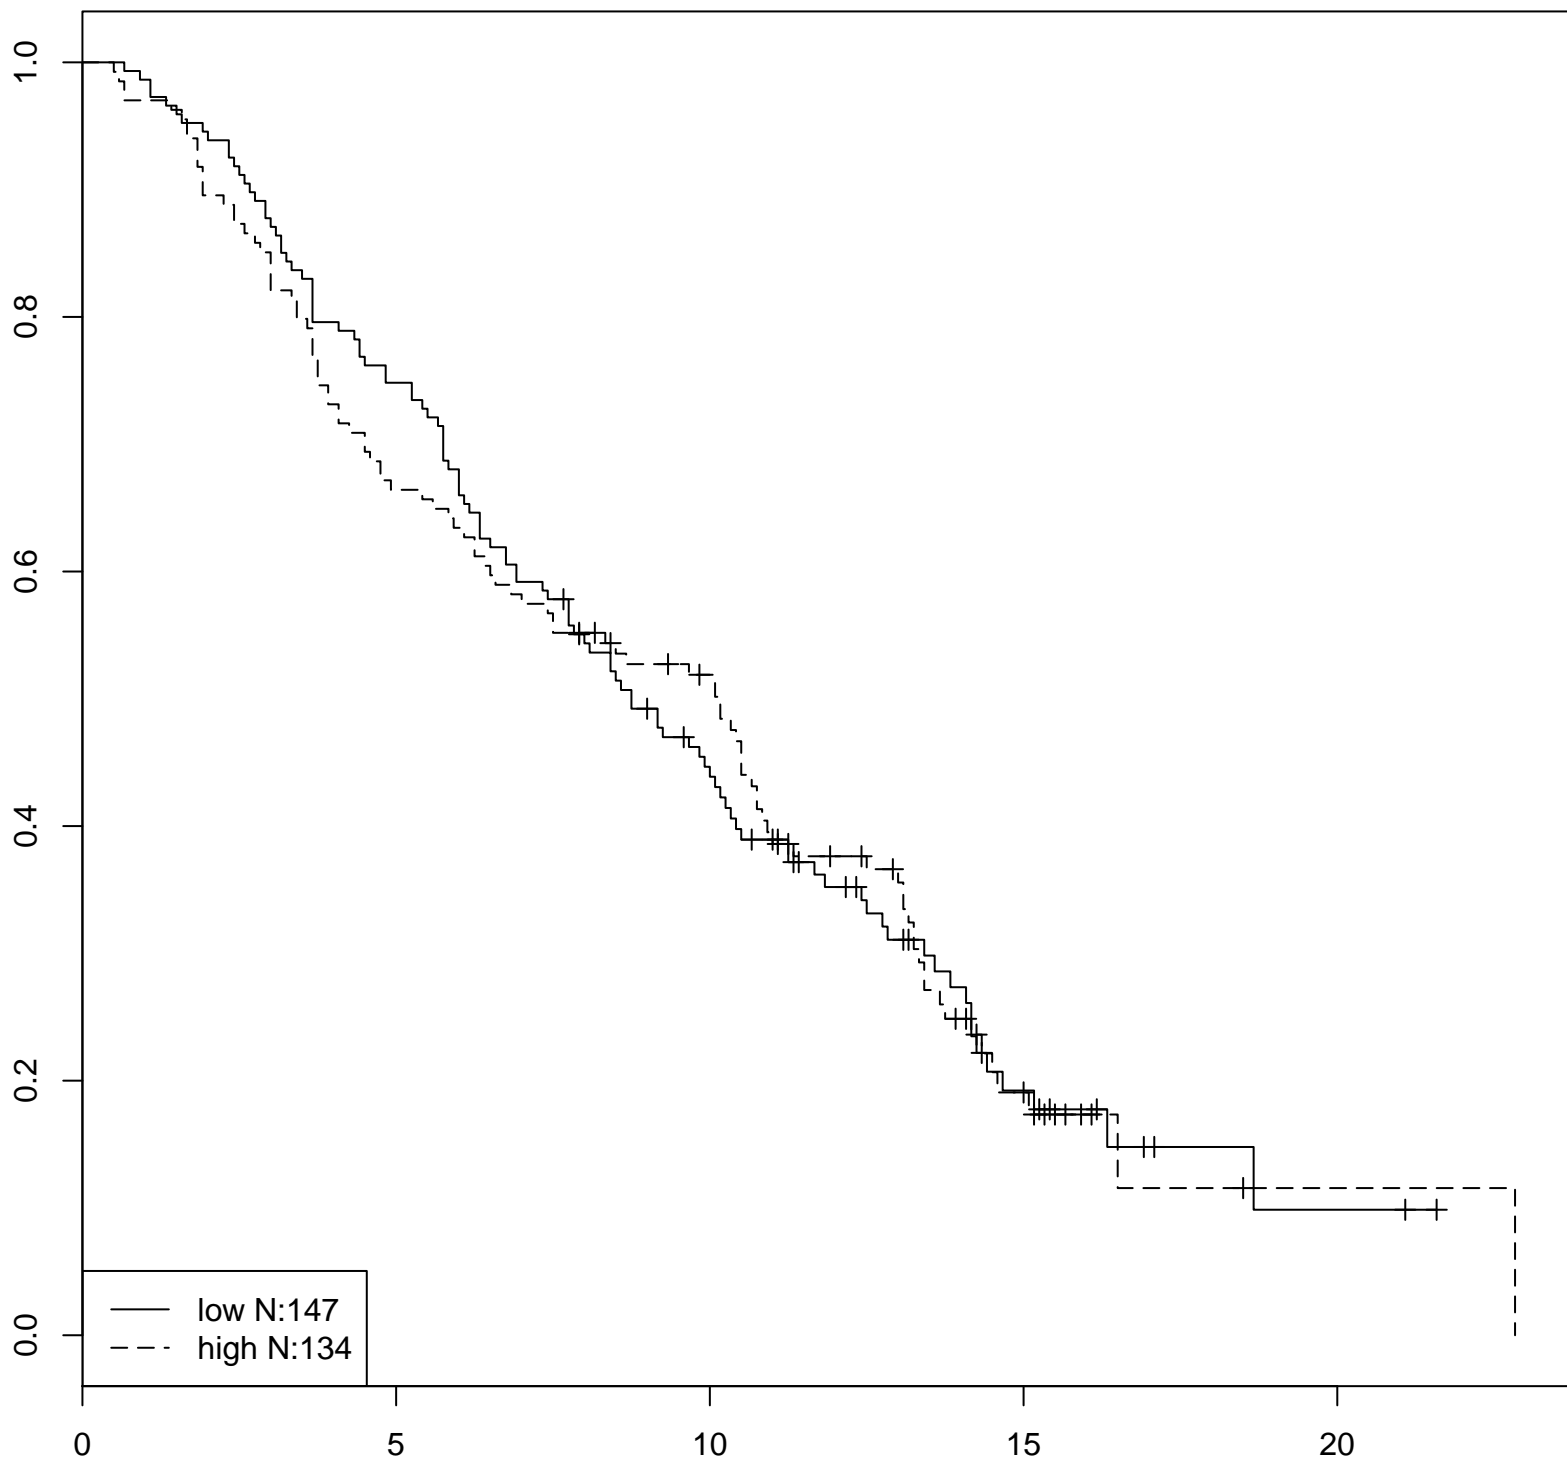

years

log-rank test p-value = 0.993

# Survival by DPP4 expression

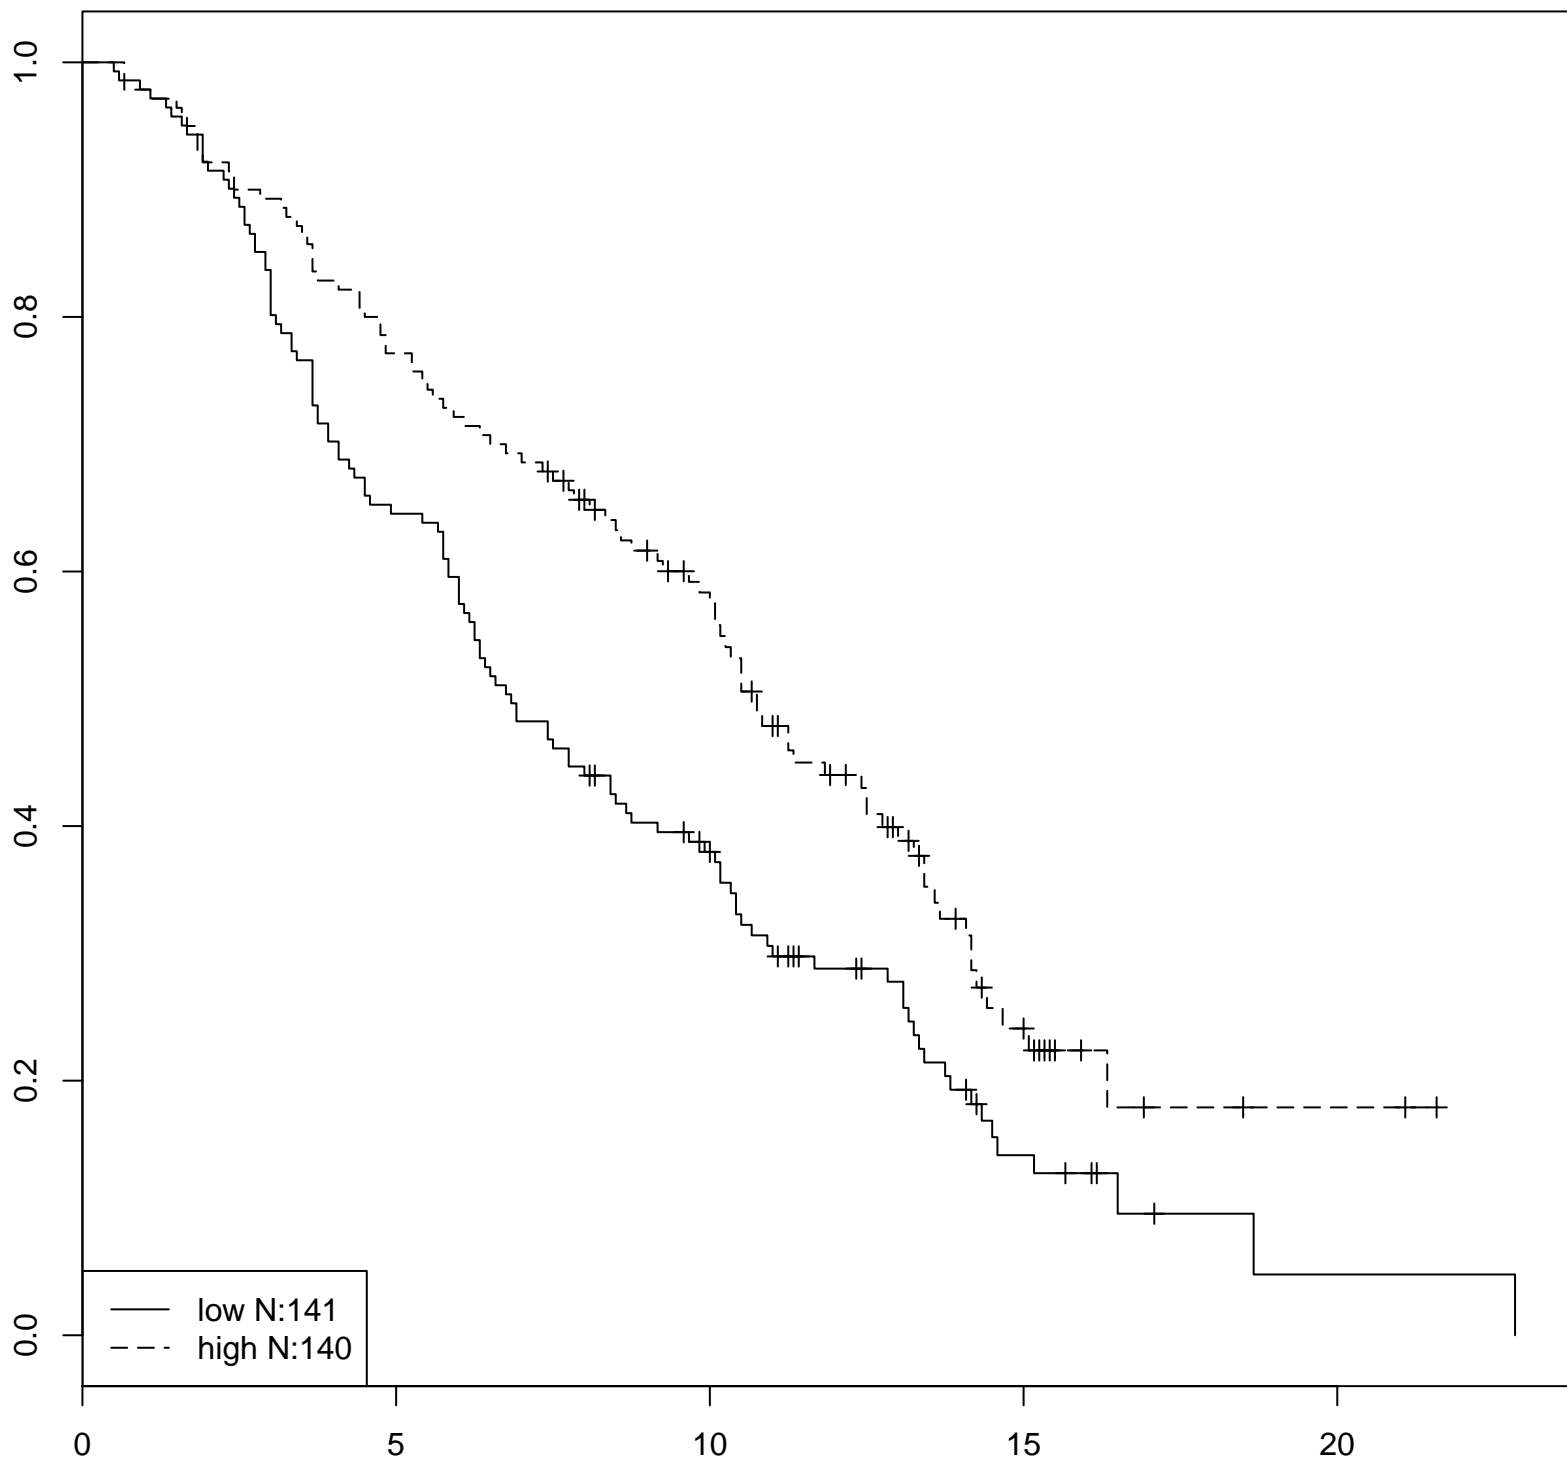

years

log-rank test p-value = 0.002

# Survival by DPYS expression

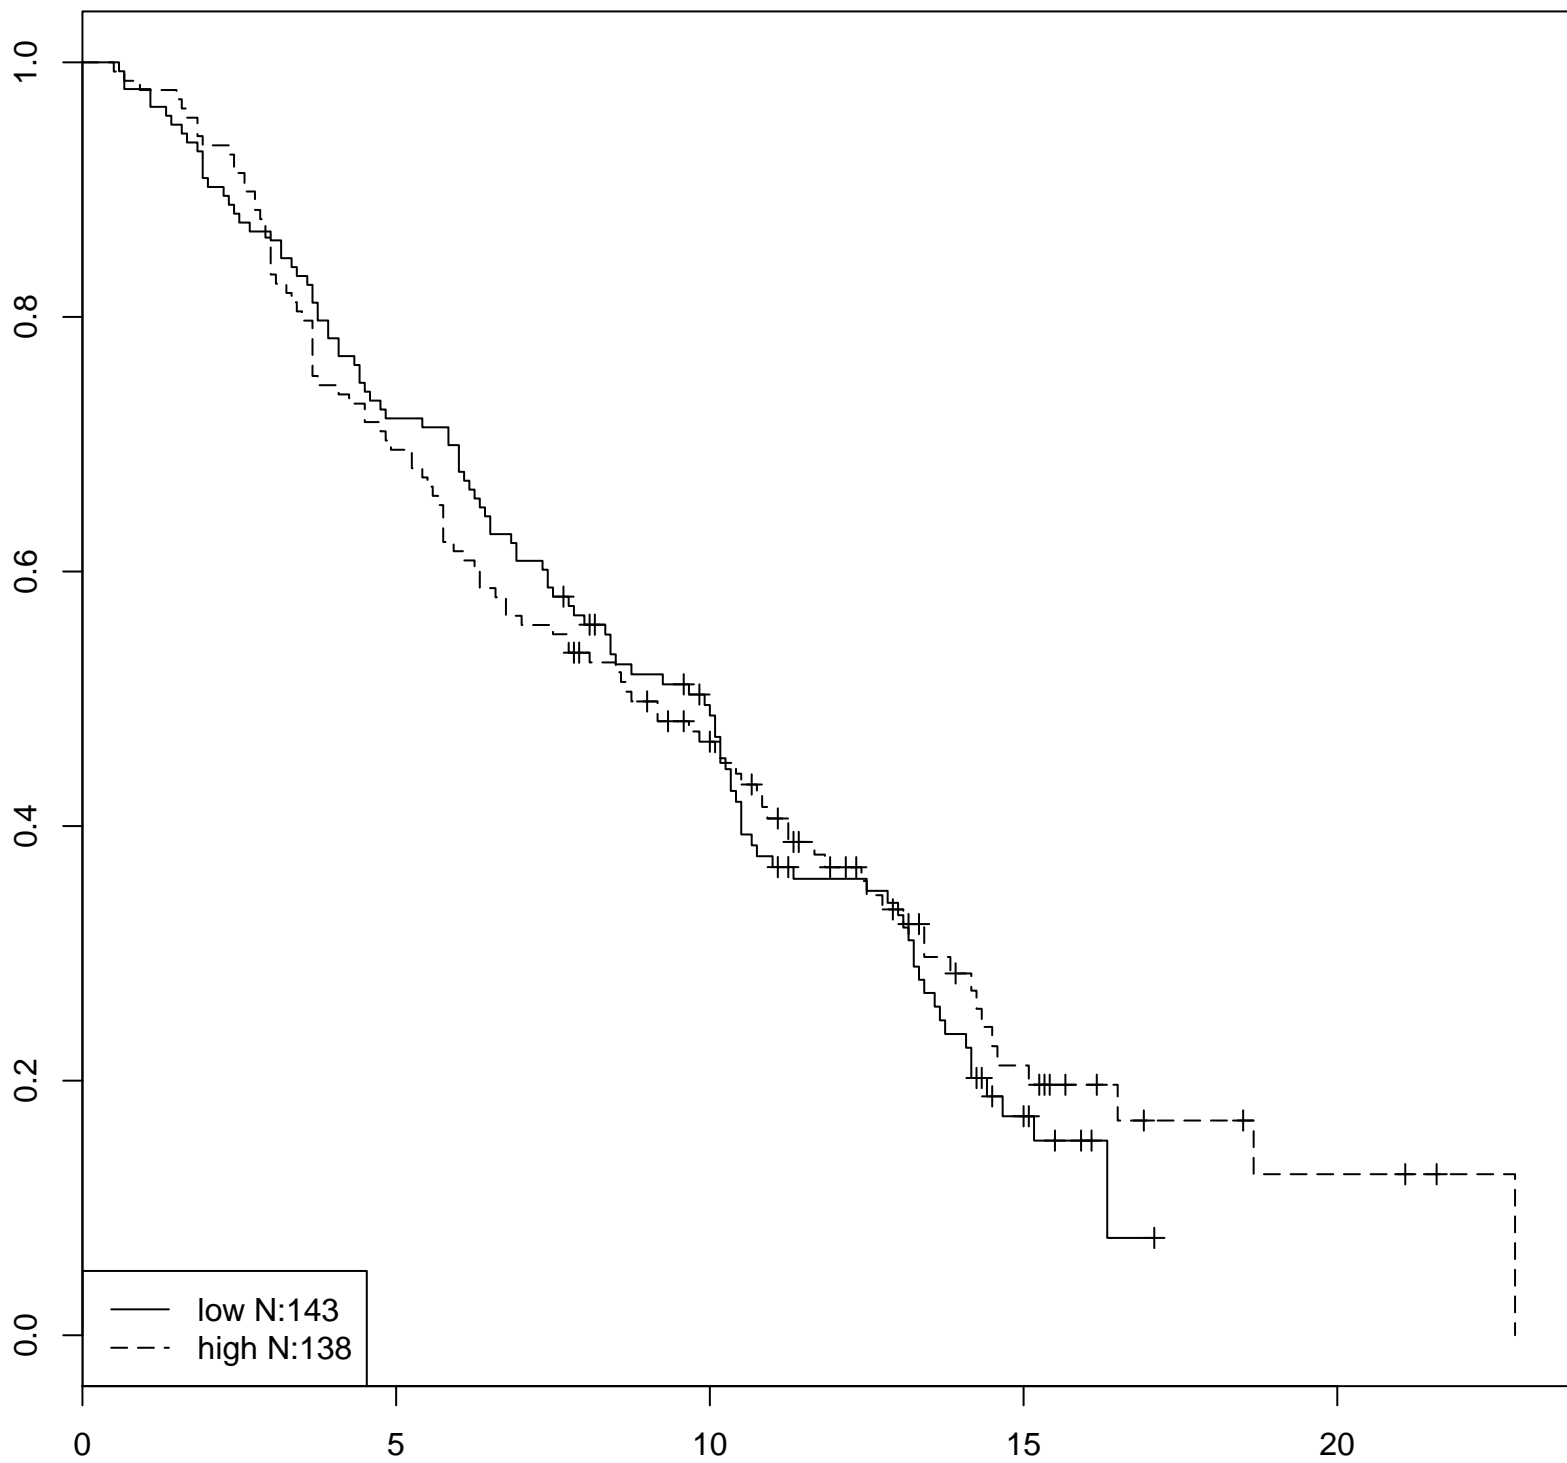

years

log-rank test p-value = 0.727

# Survival by DVL1 expression

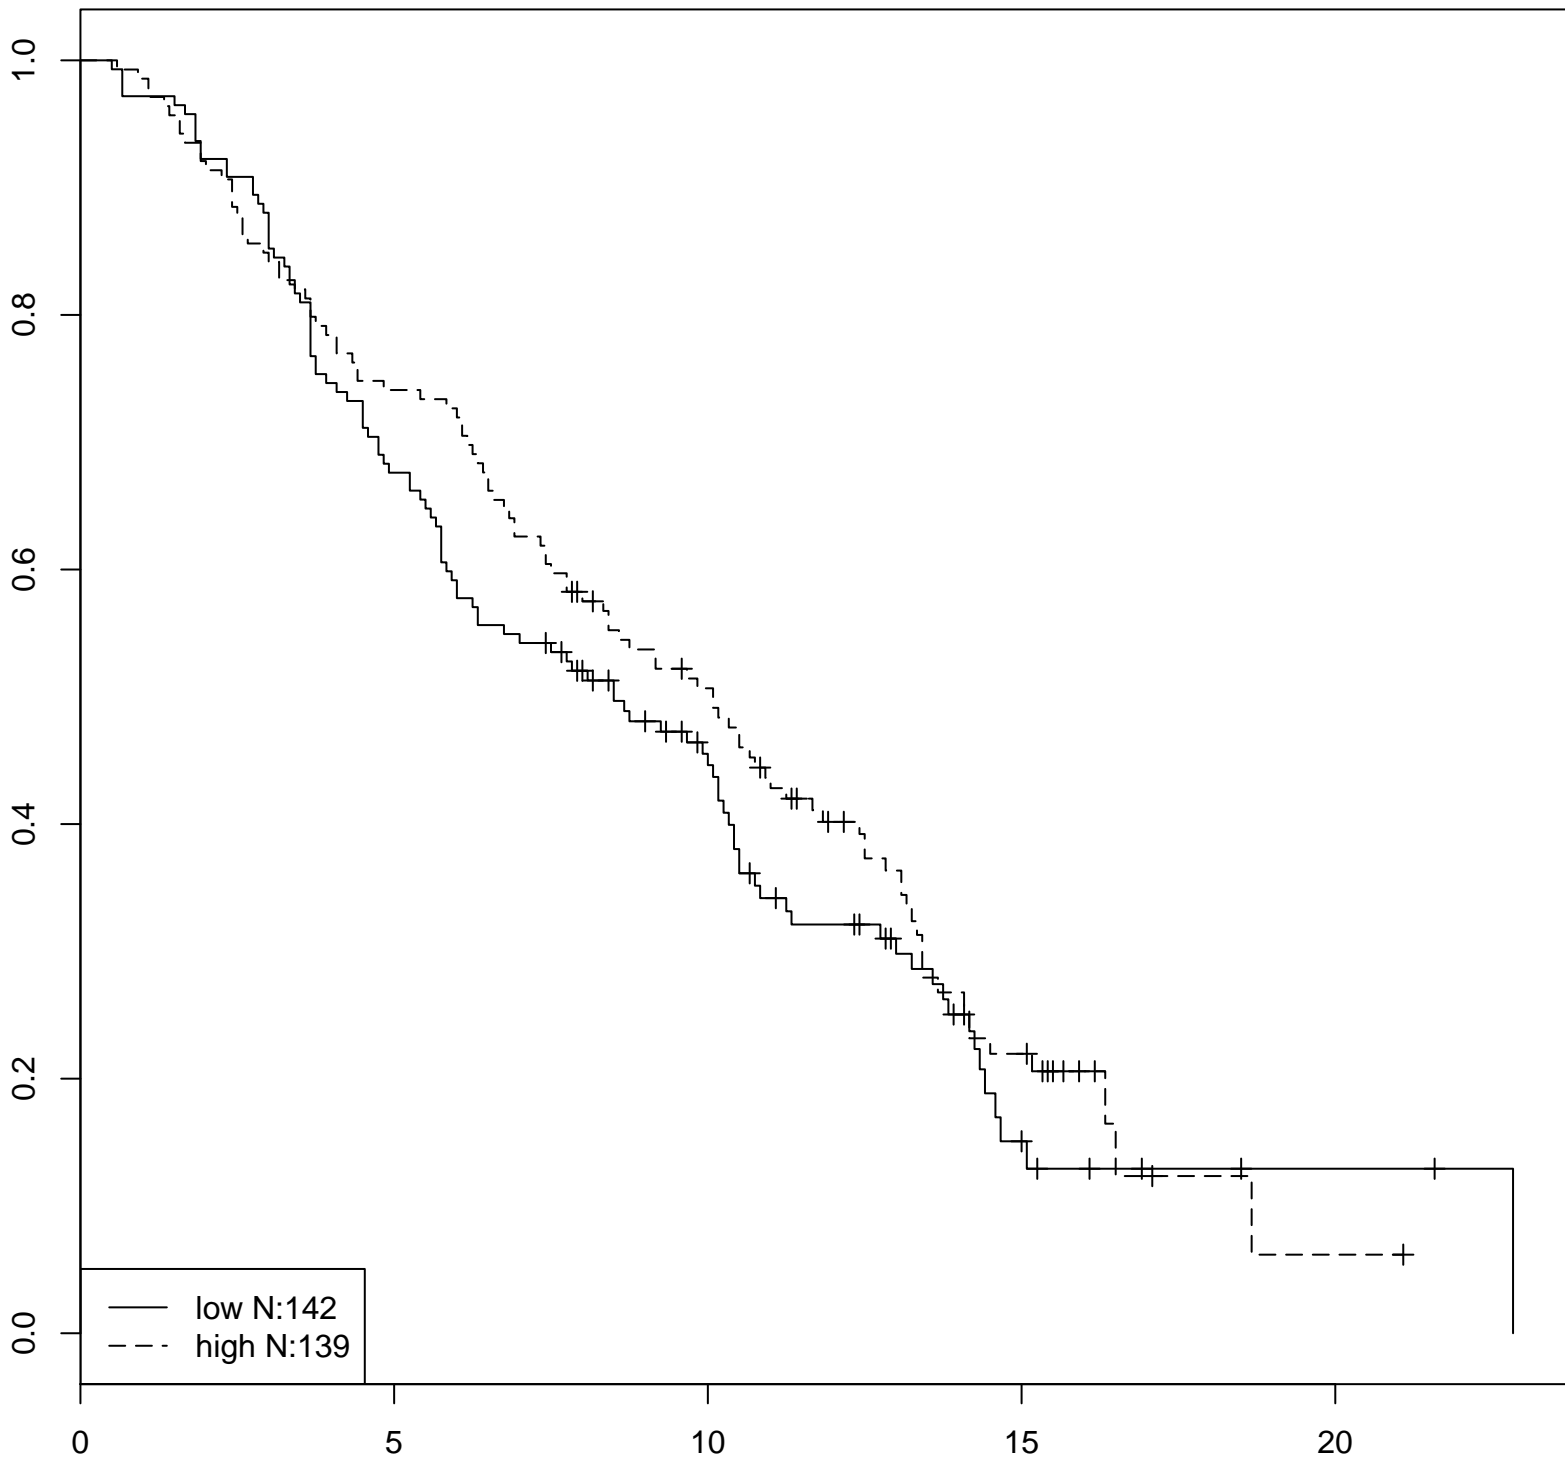

log-rank test p-value = 0.302

# Survival by E2F1 expression

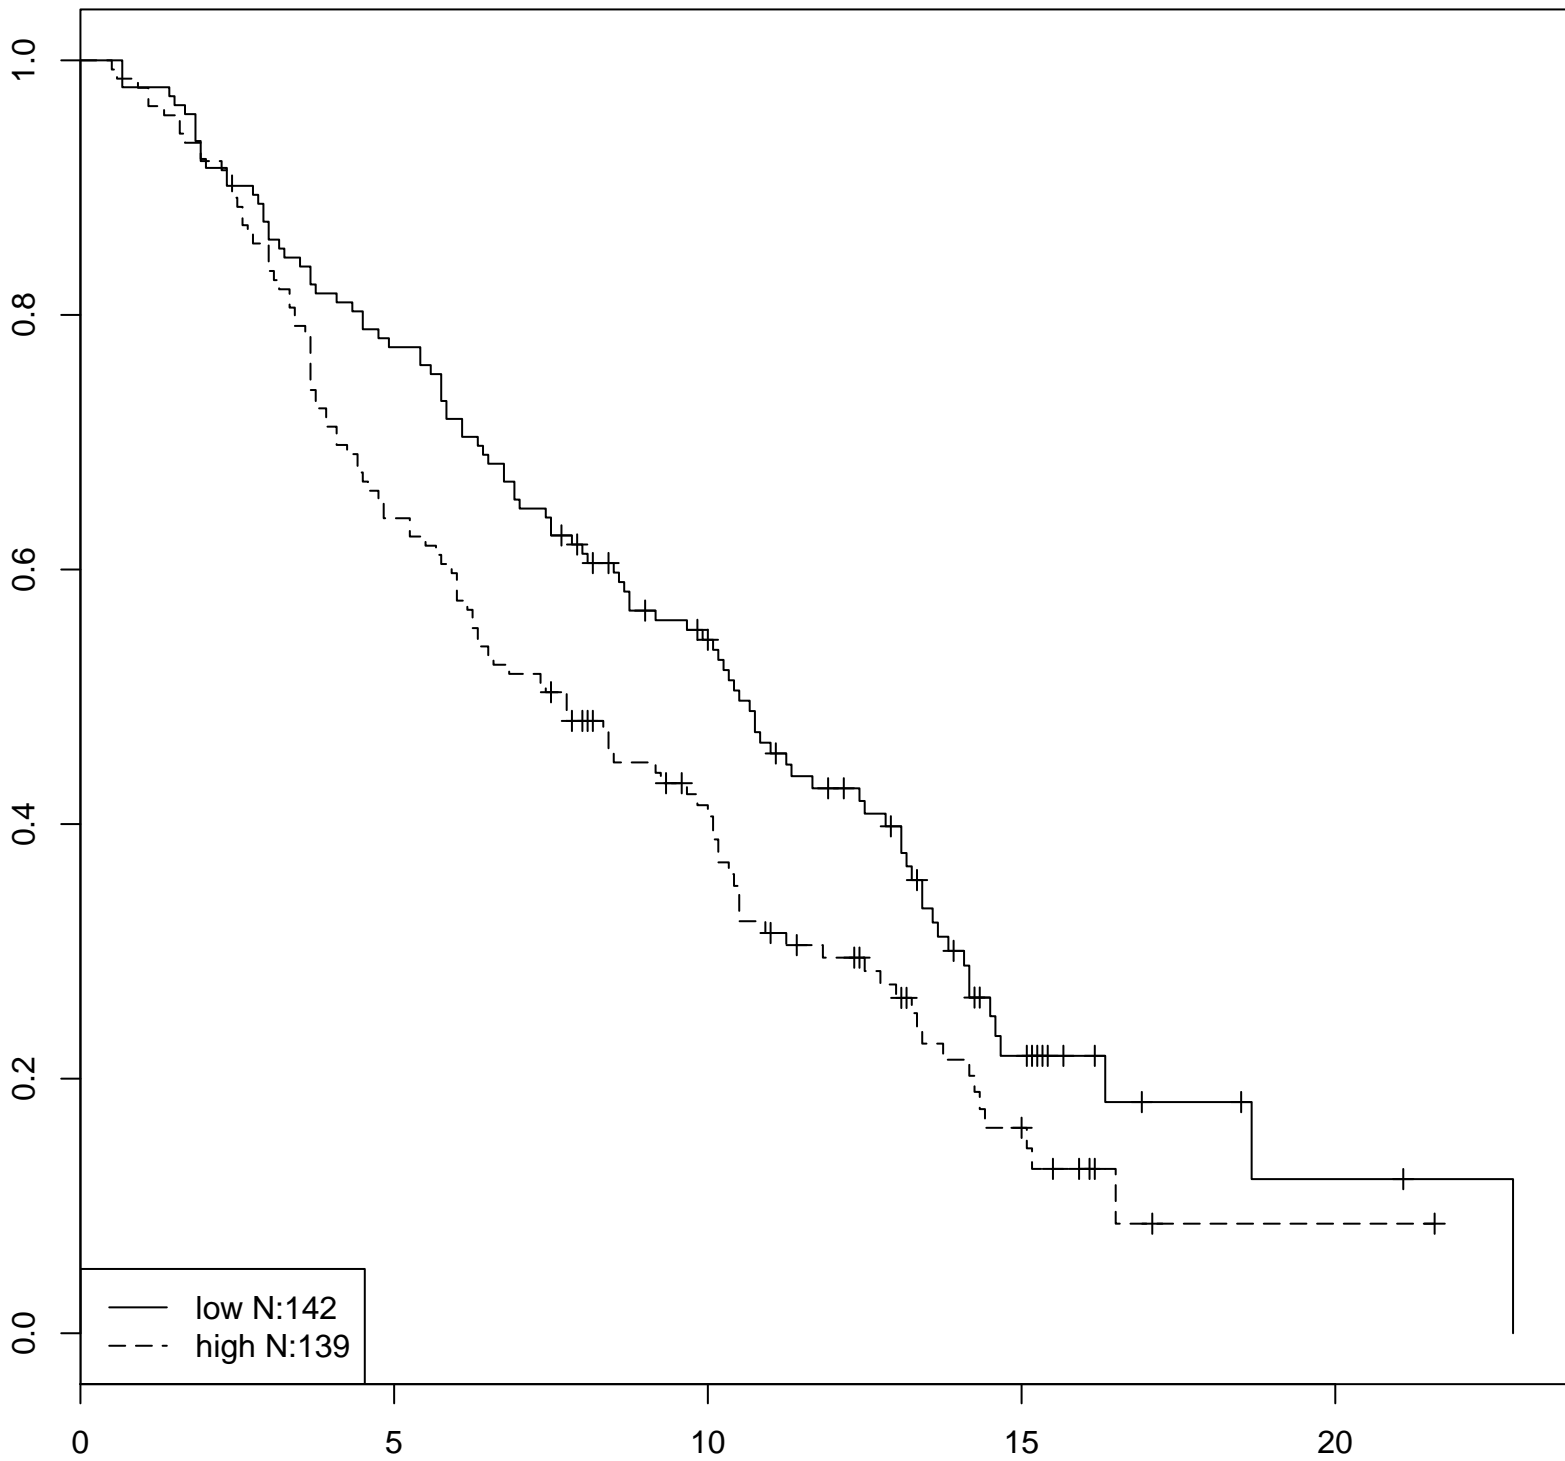

years

log-rank test p-value = 0.015



# Survival by EFS expression

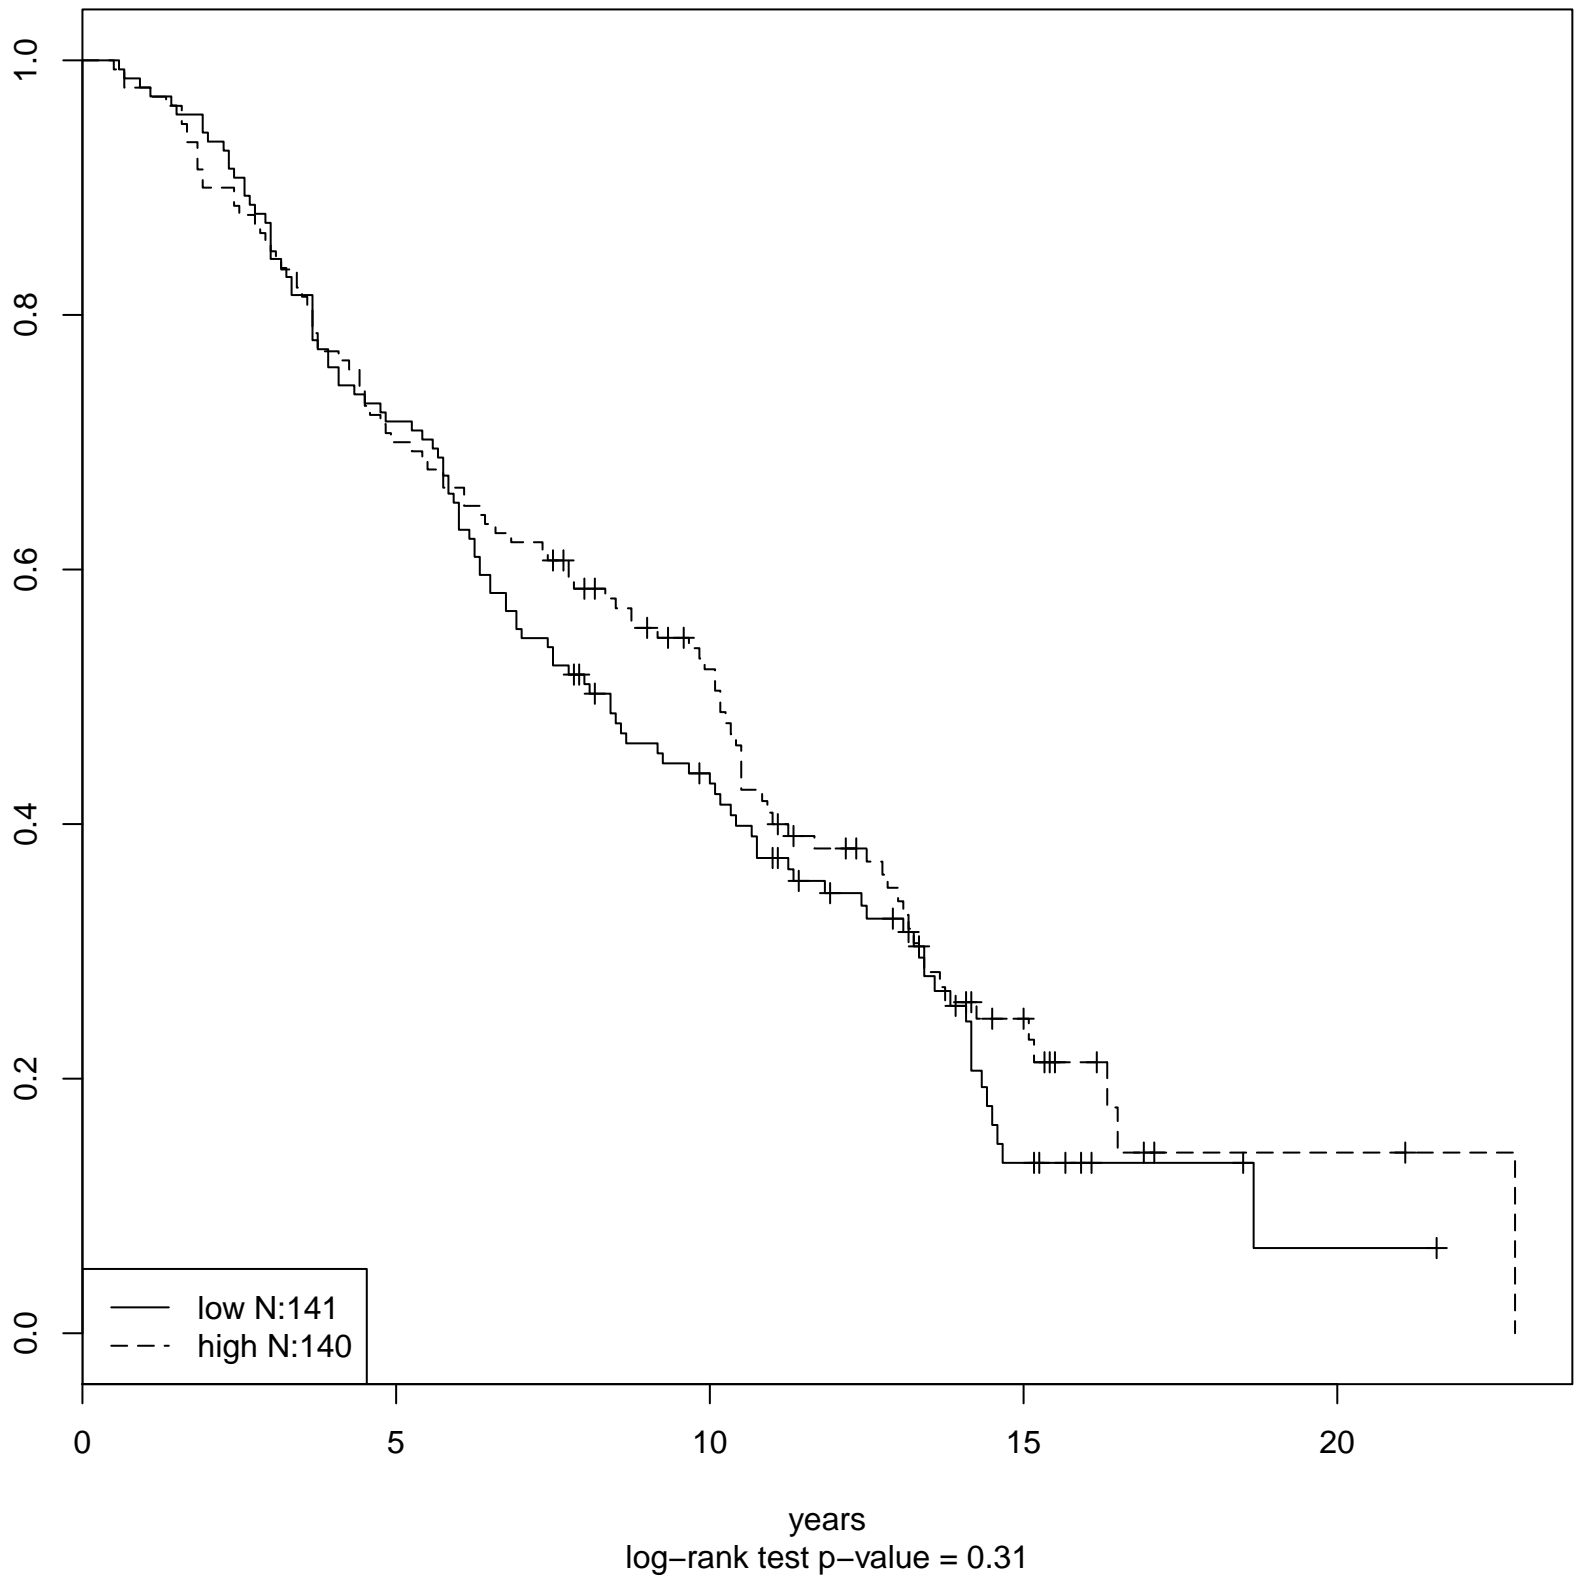

# Survival by EGFR expression

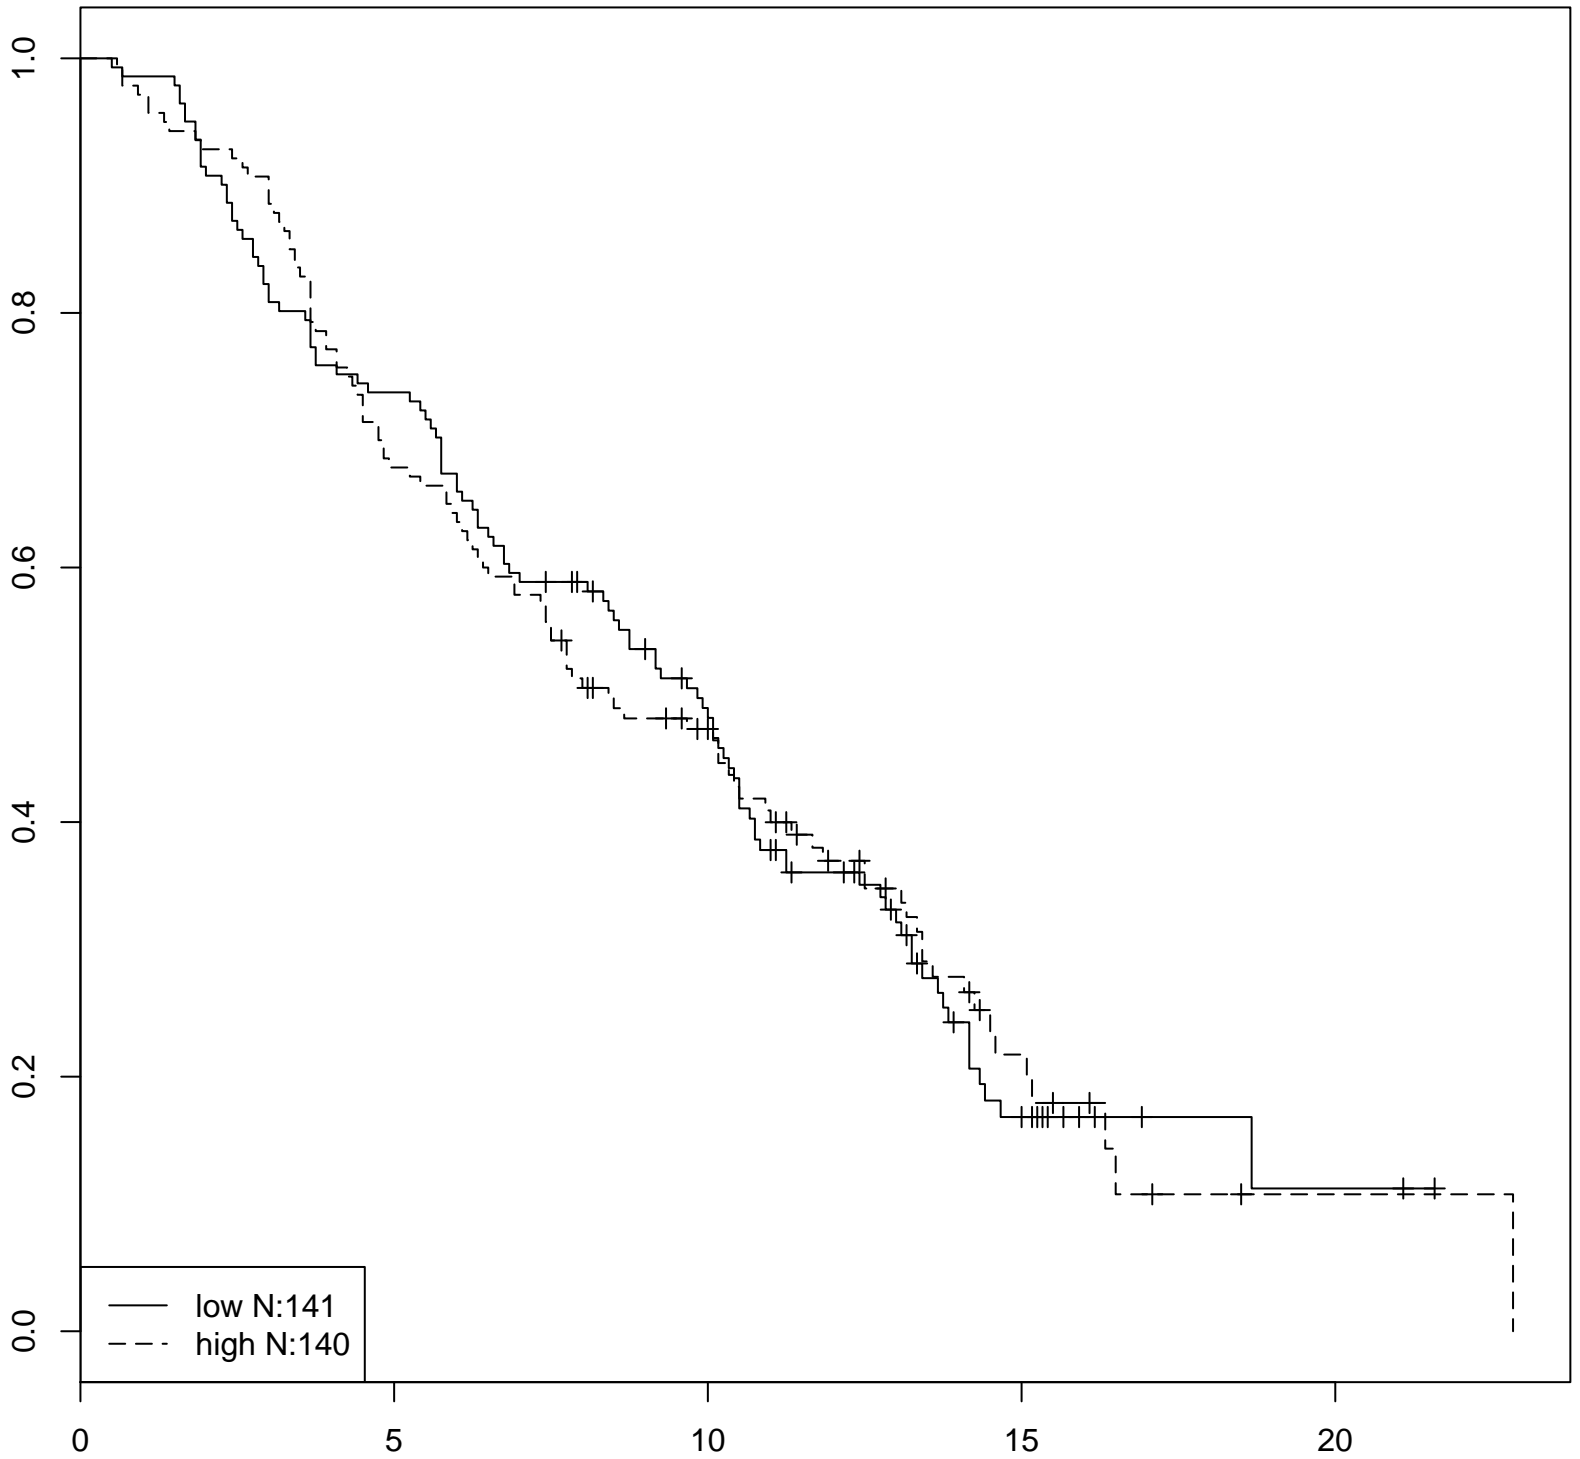

years

log-rank test p-value = 0.957

# Survival by EGR1 expression

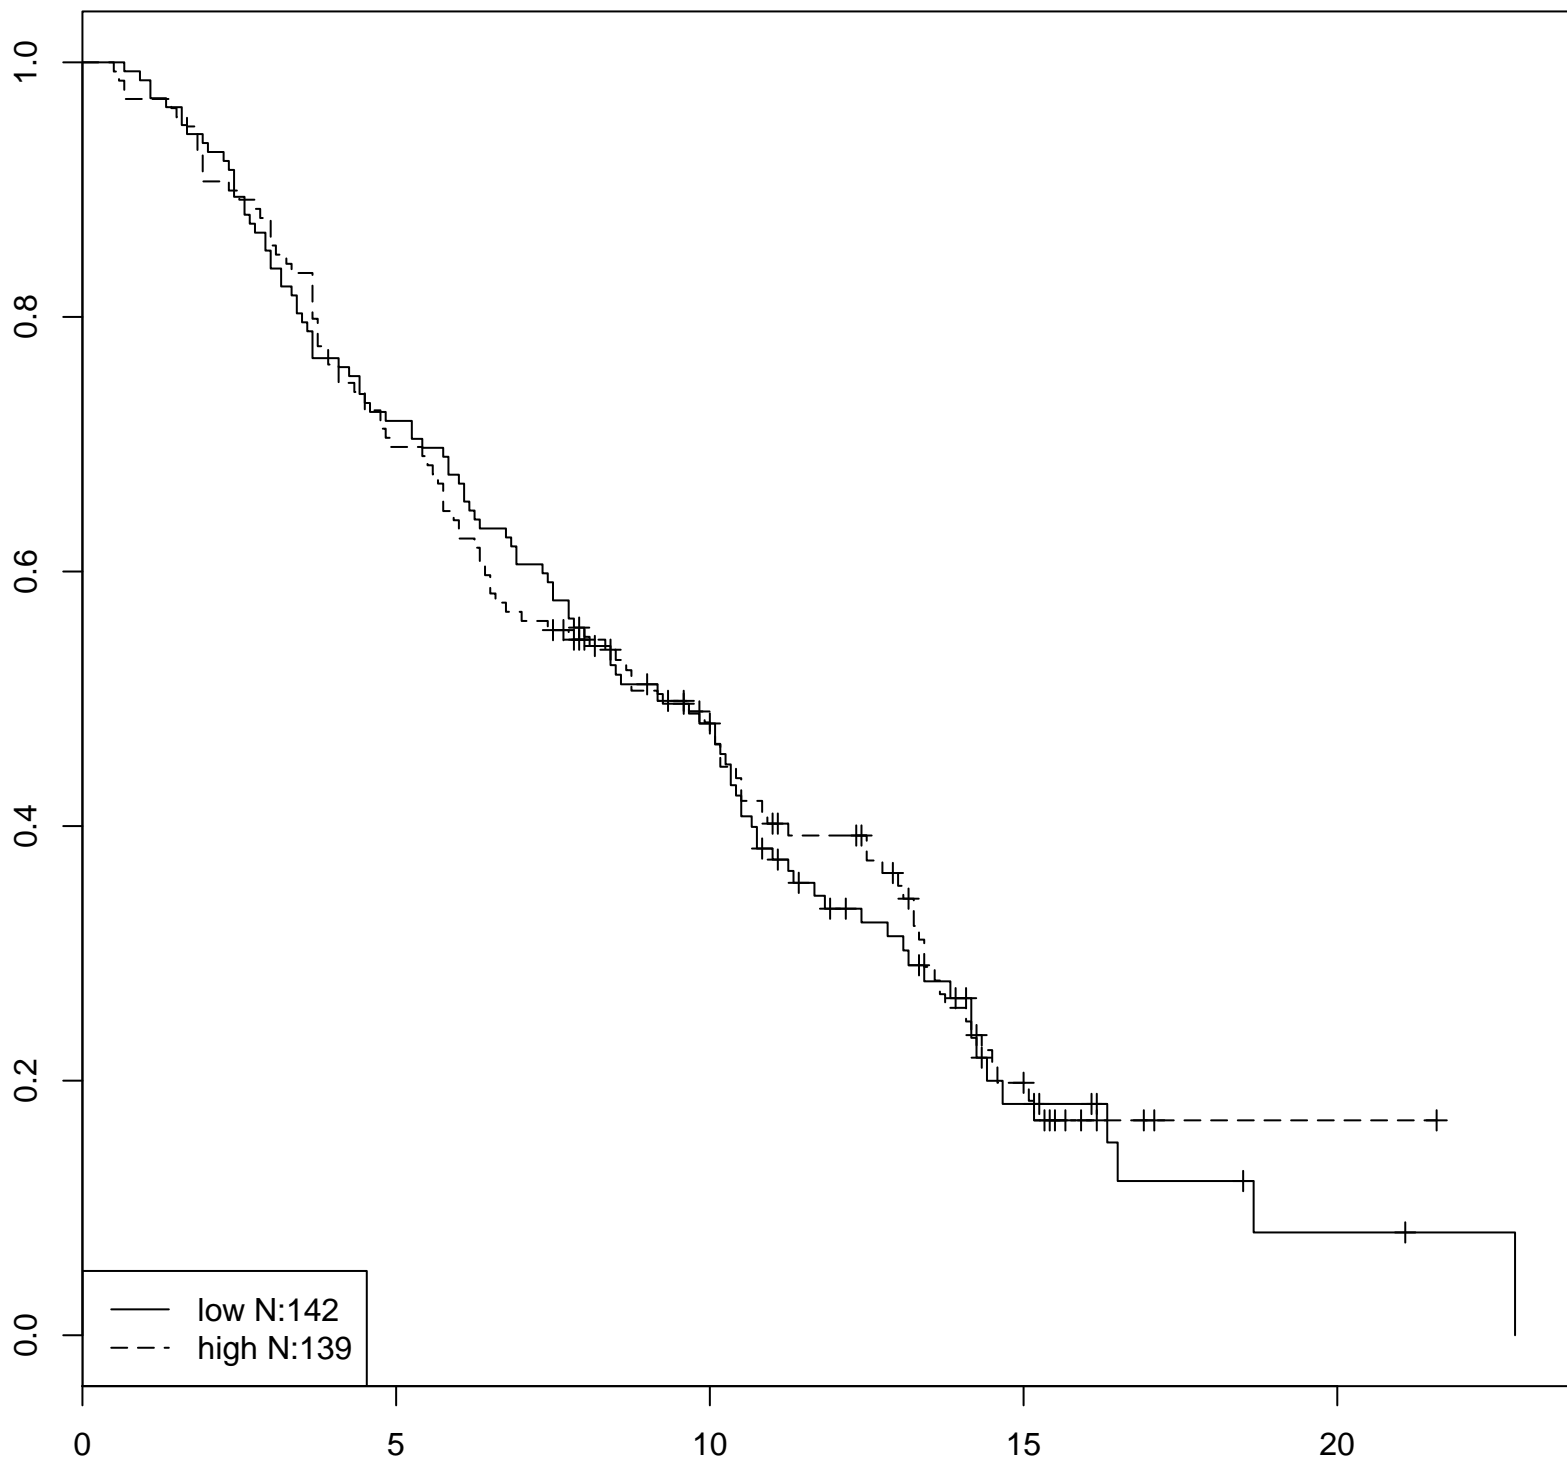

years

log-rank test p-value = 0.829

# Survival by EN2 expression

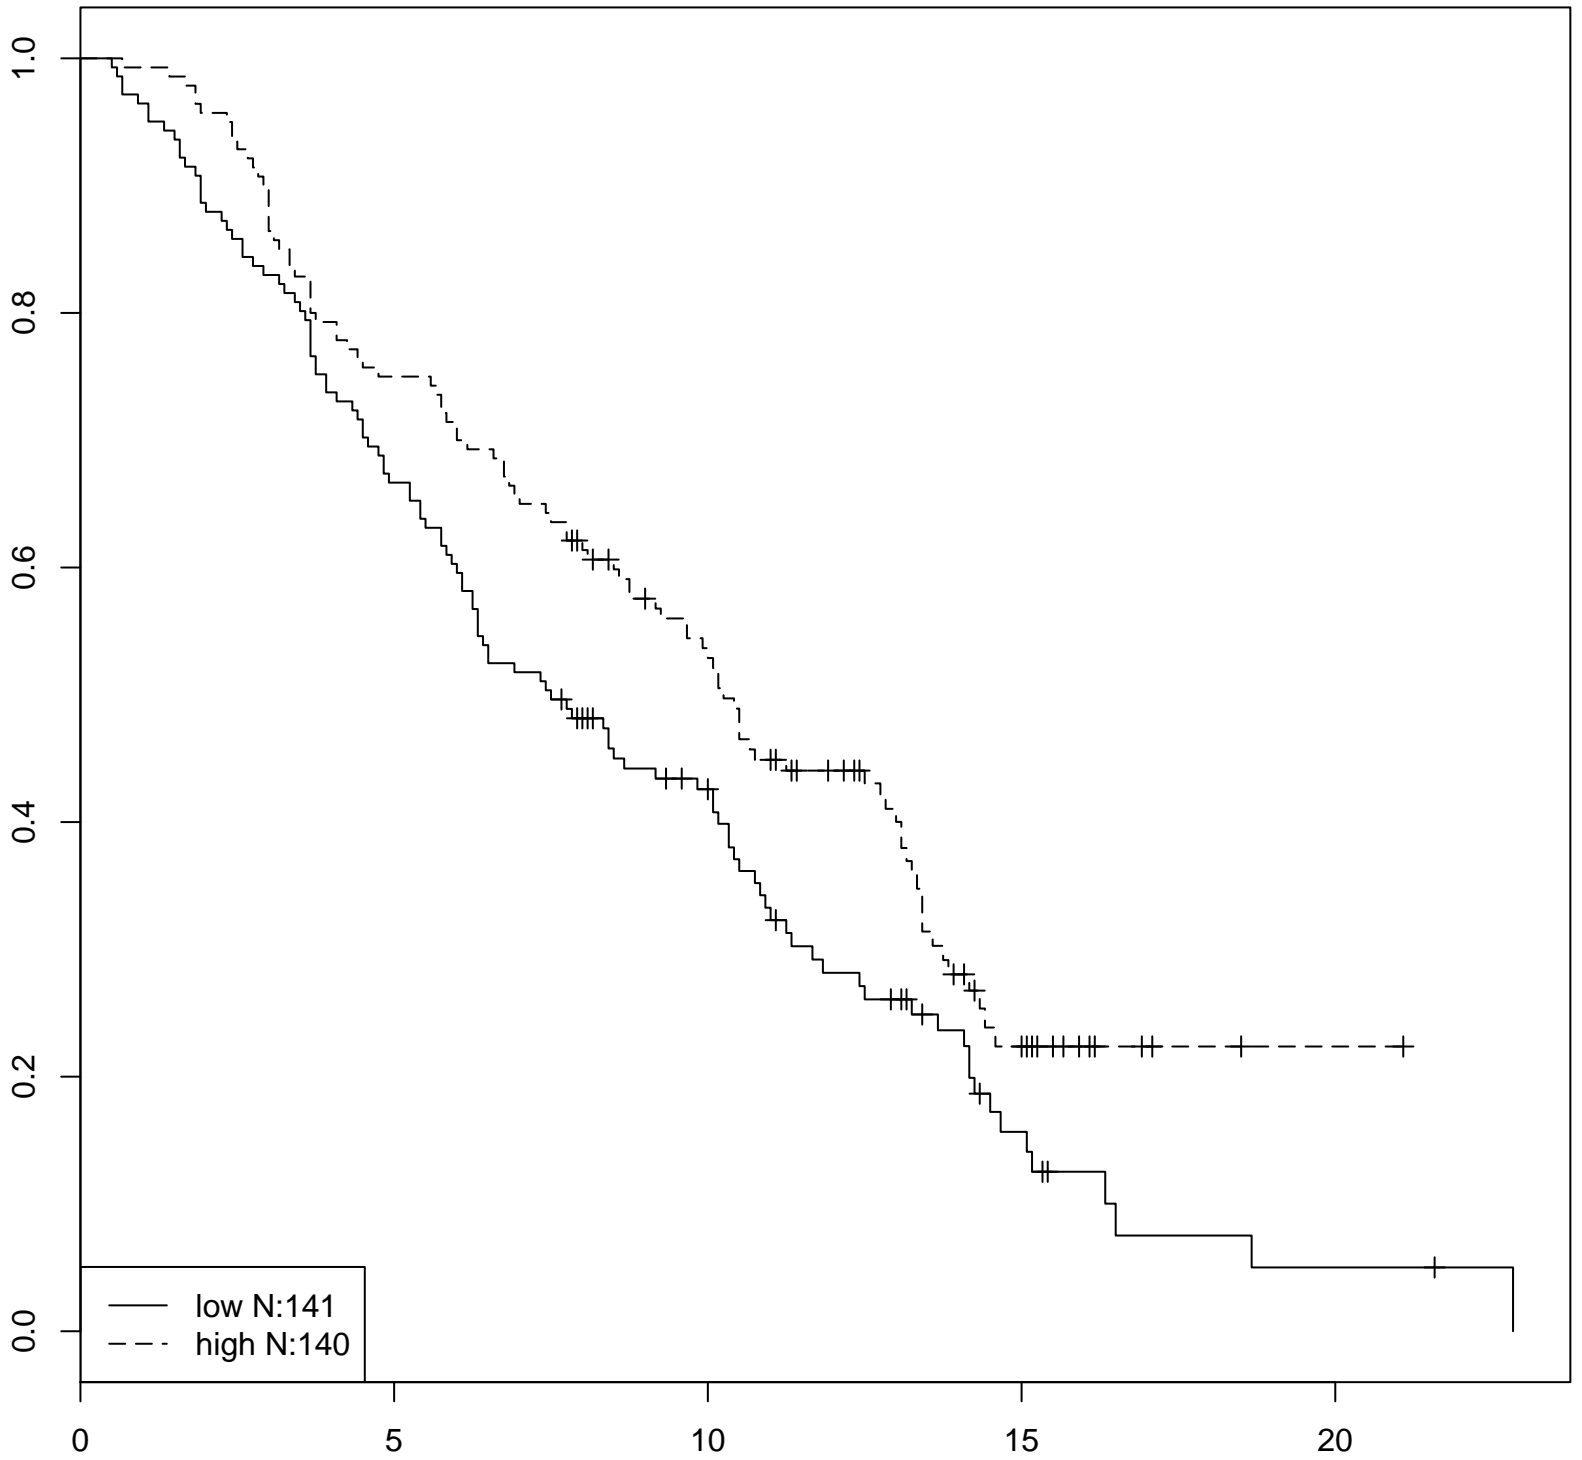

years  
log-rank test p-value = 0.014

# Survival by ENG expression

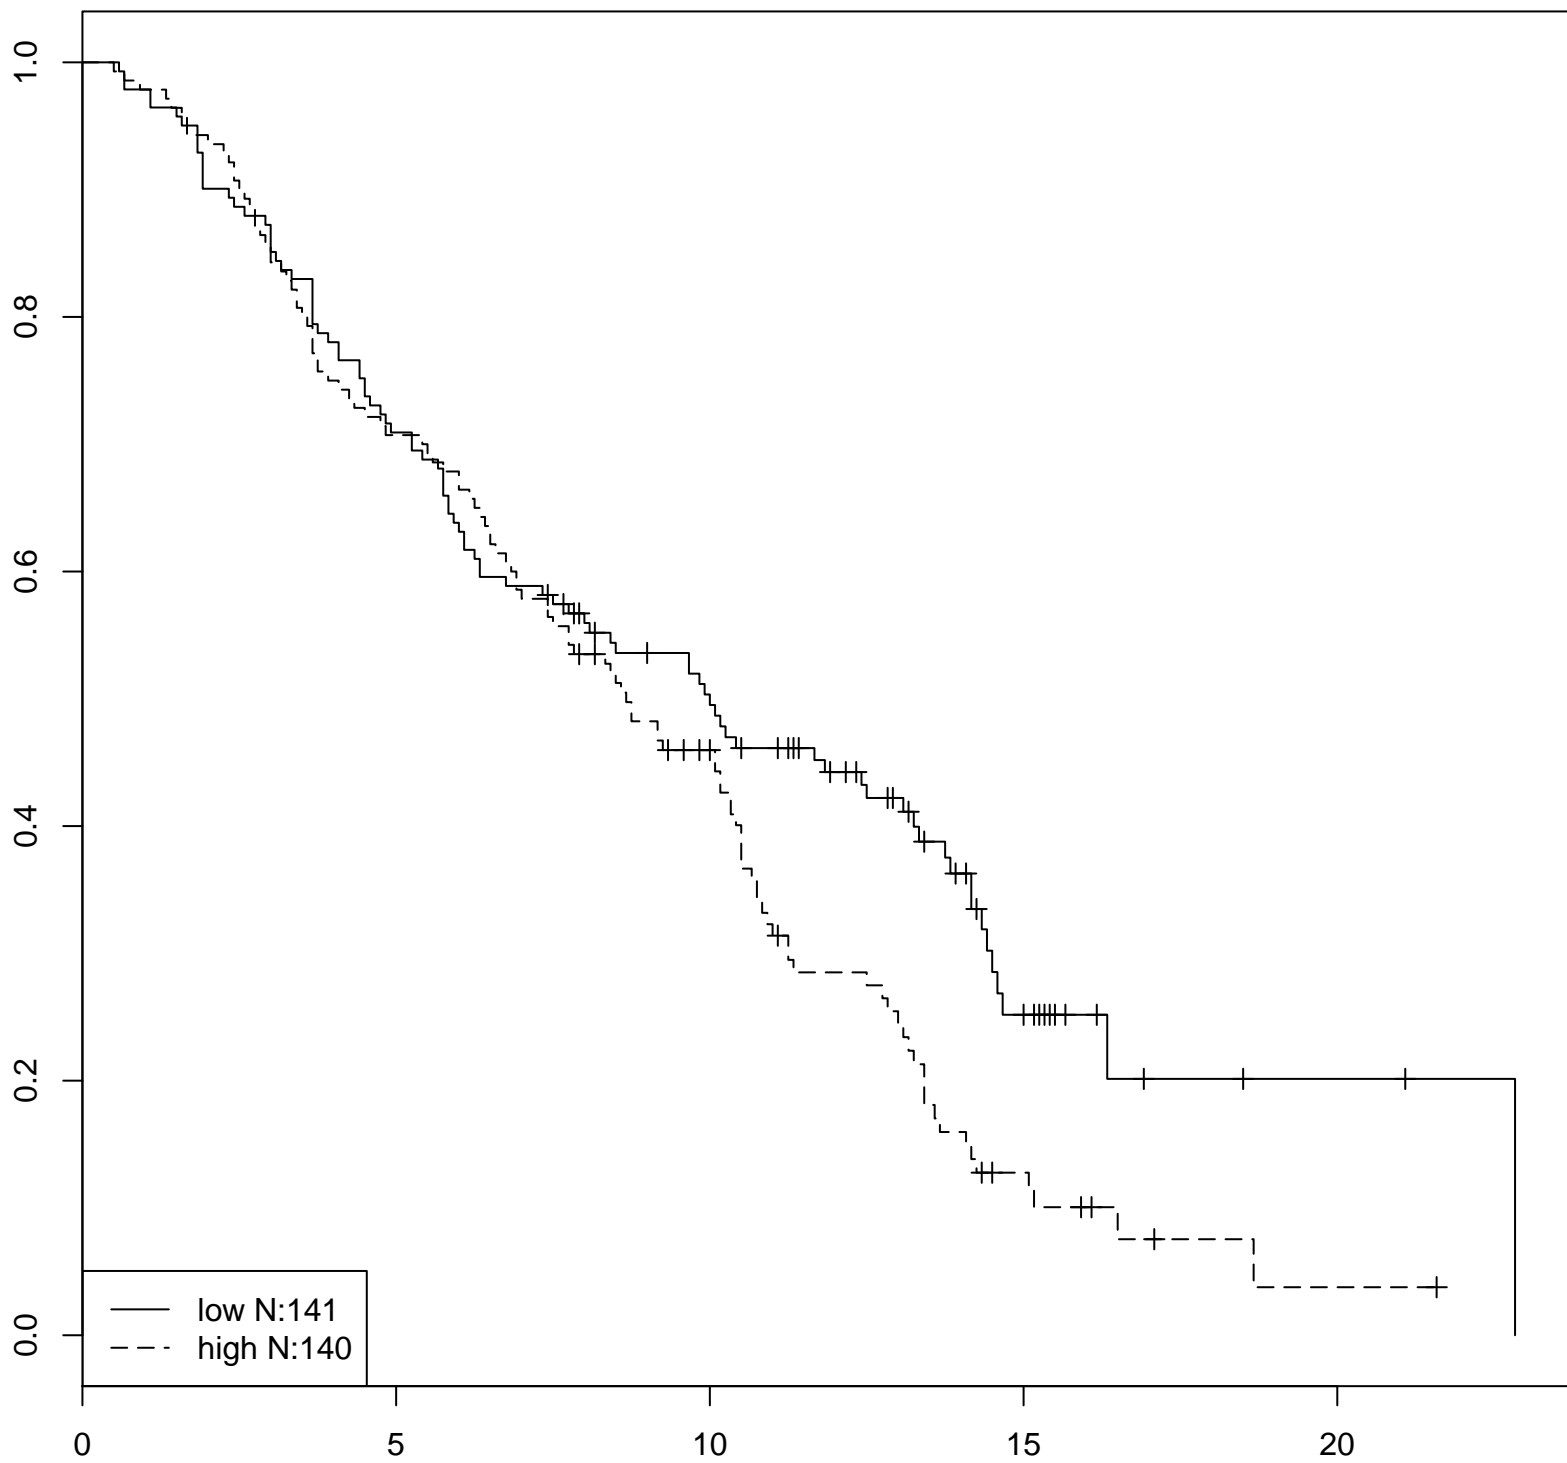

years

log-rank test p-value = 0.014

# Survival by ENO2 expression

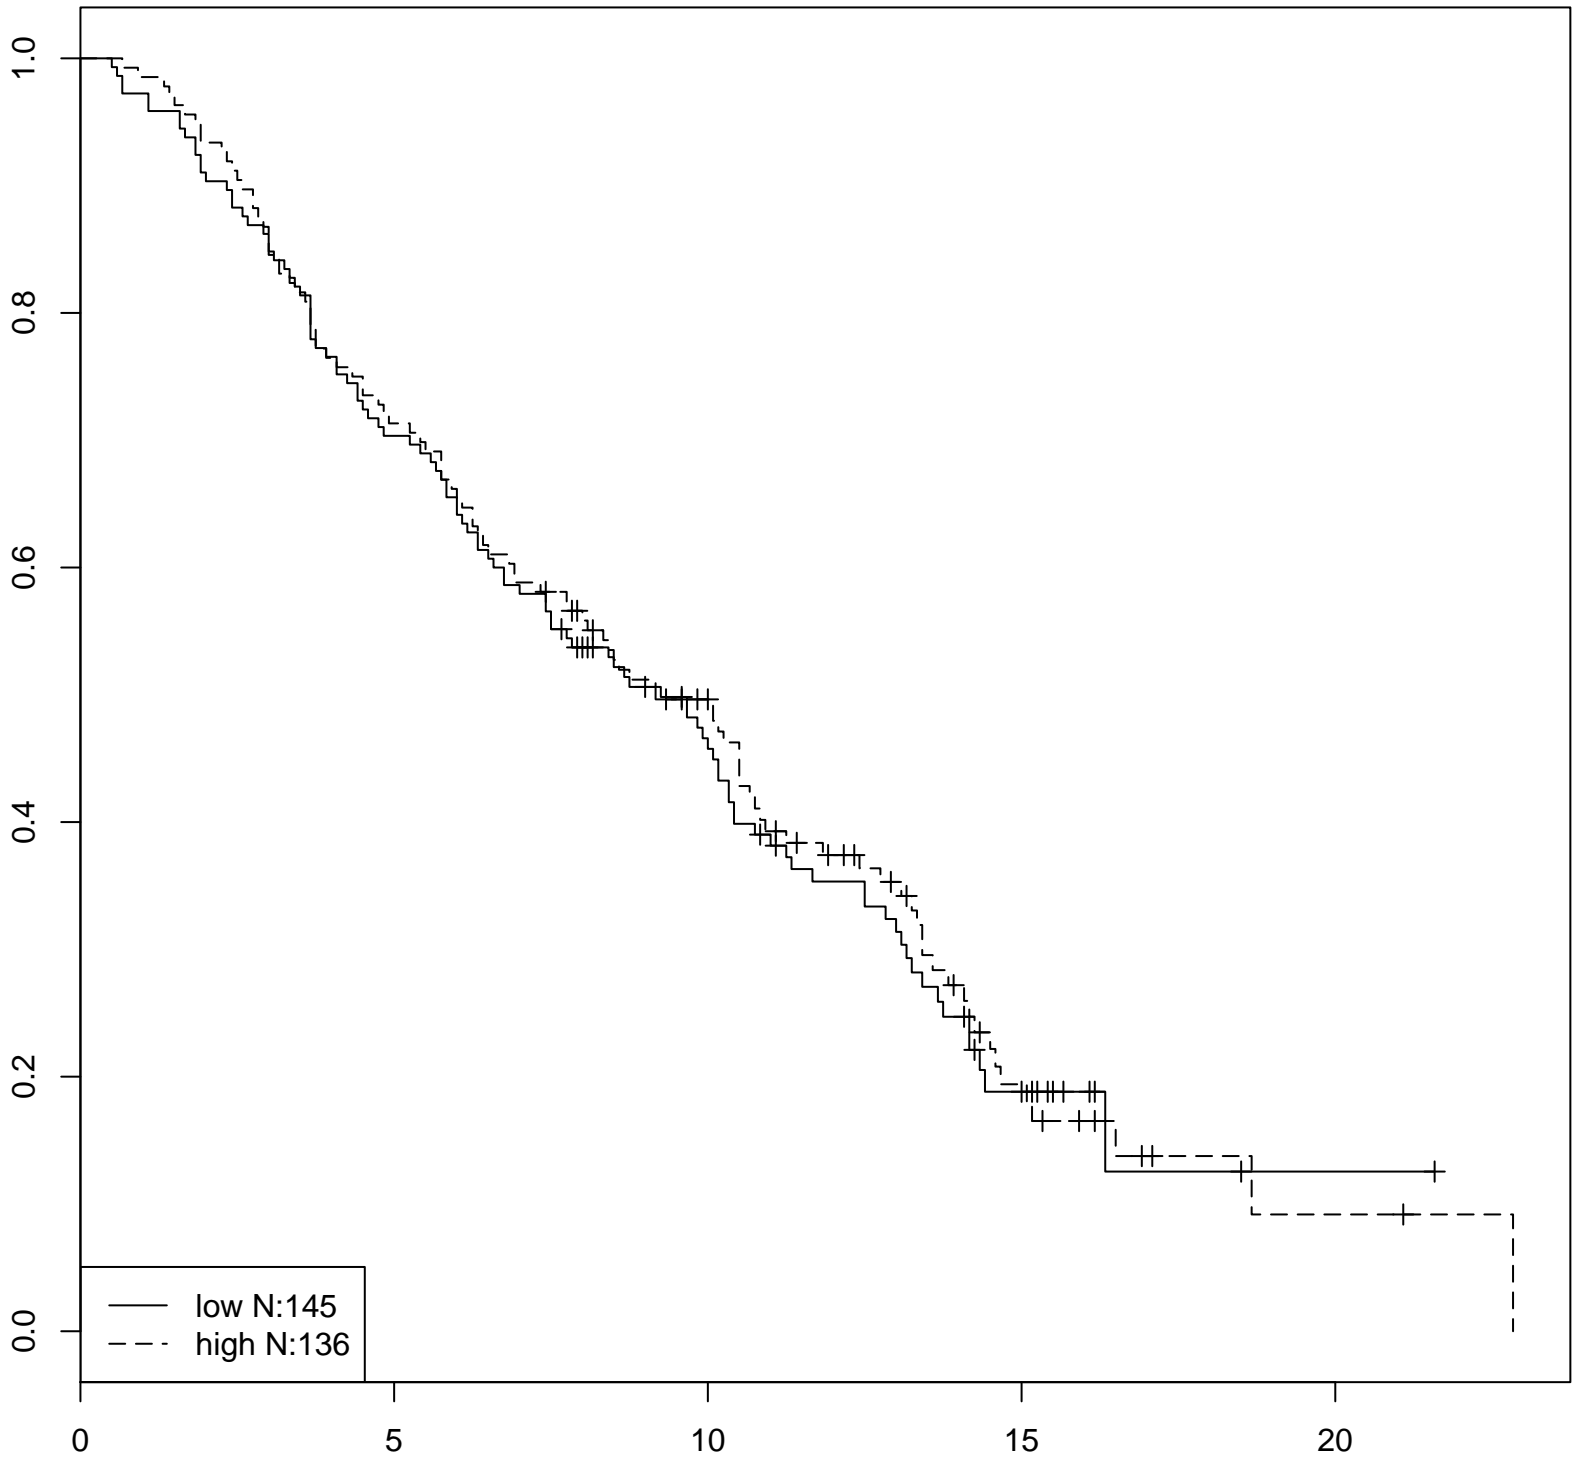

years

log-rank test p-value = 0.769

# Survival by EP300 expression

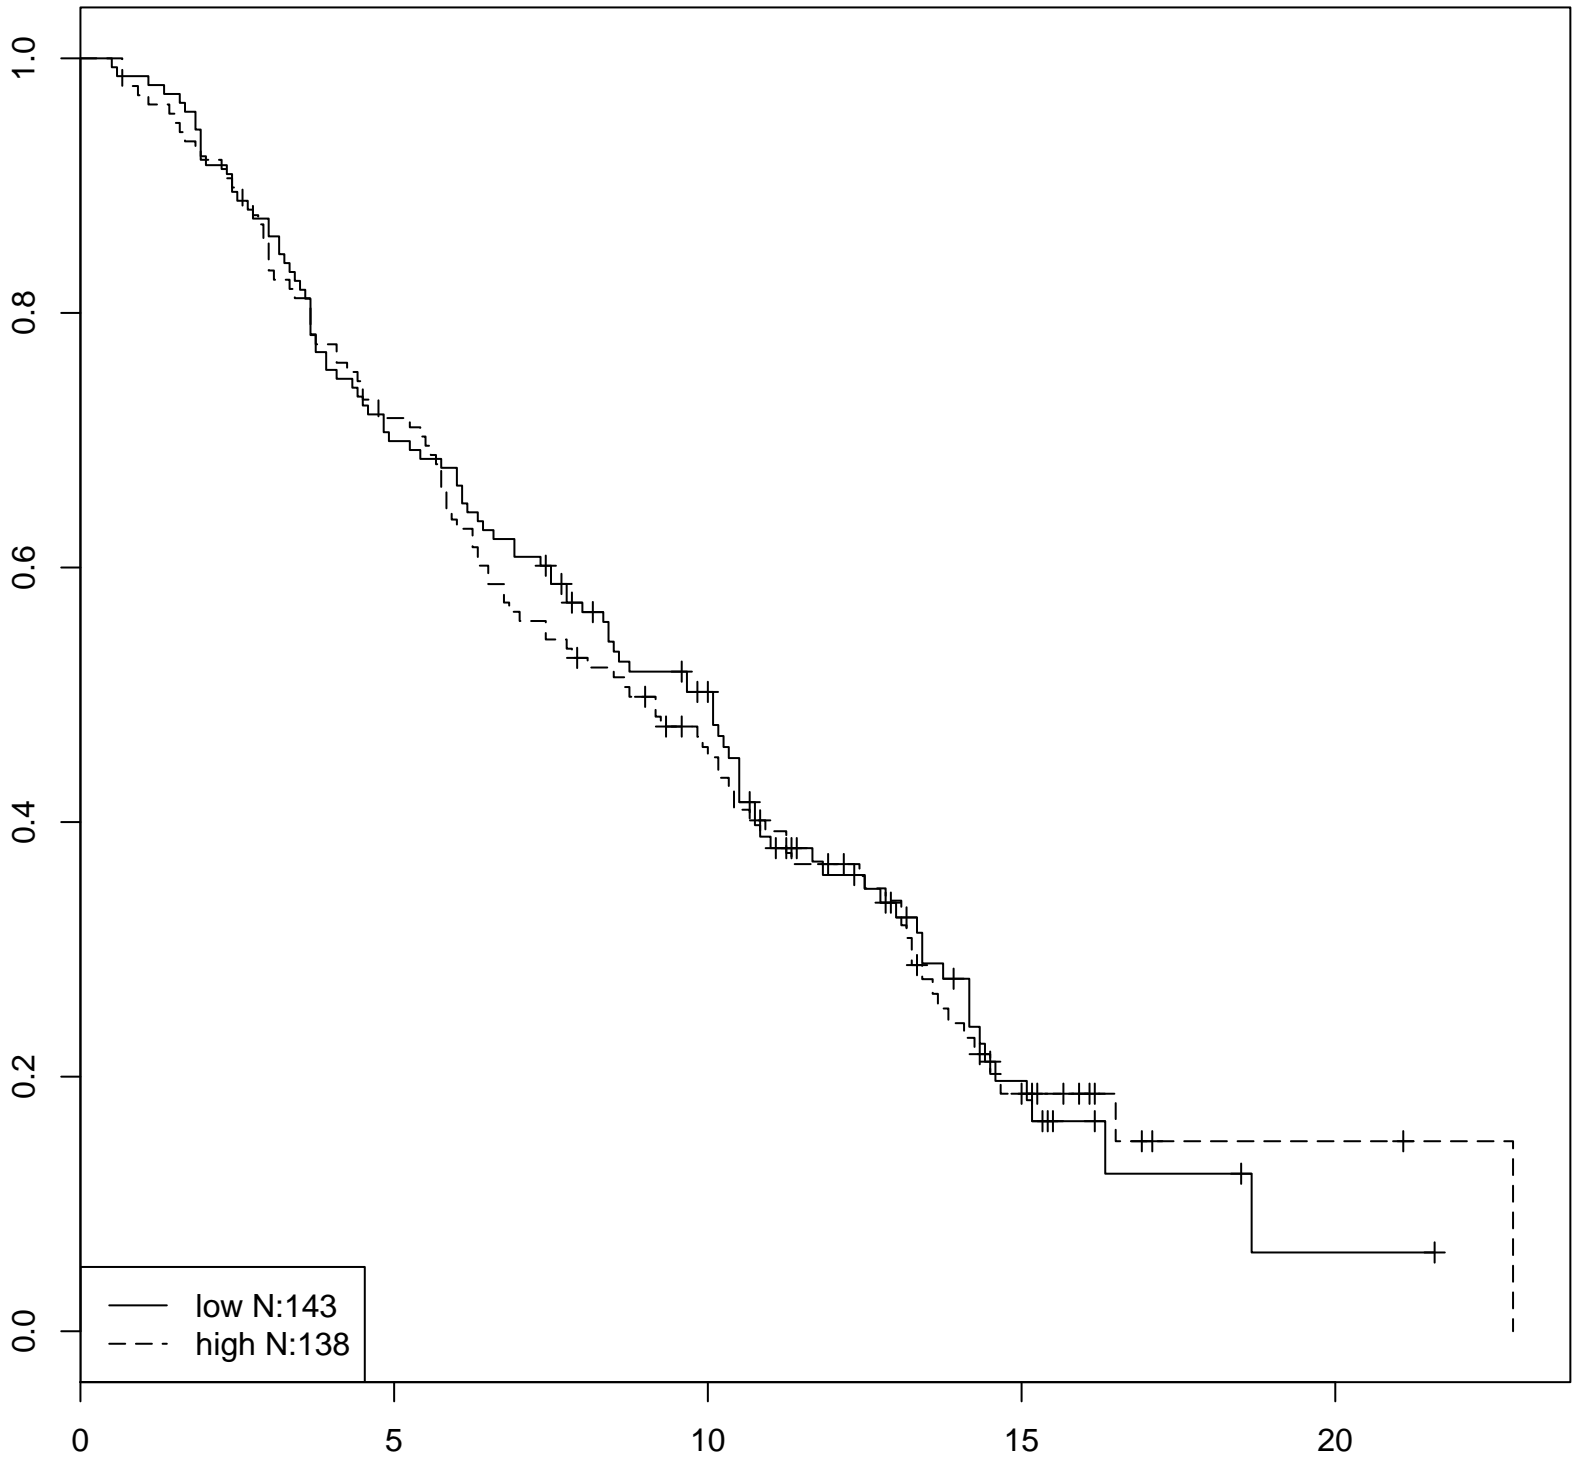

years

log-rank test p-value = 0.893

# Survival by ERG expression

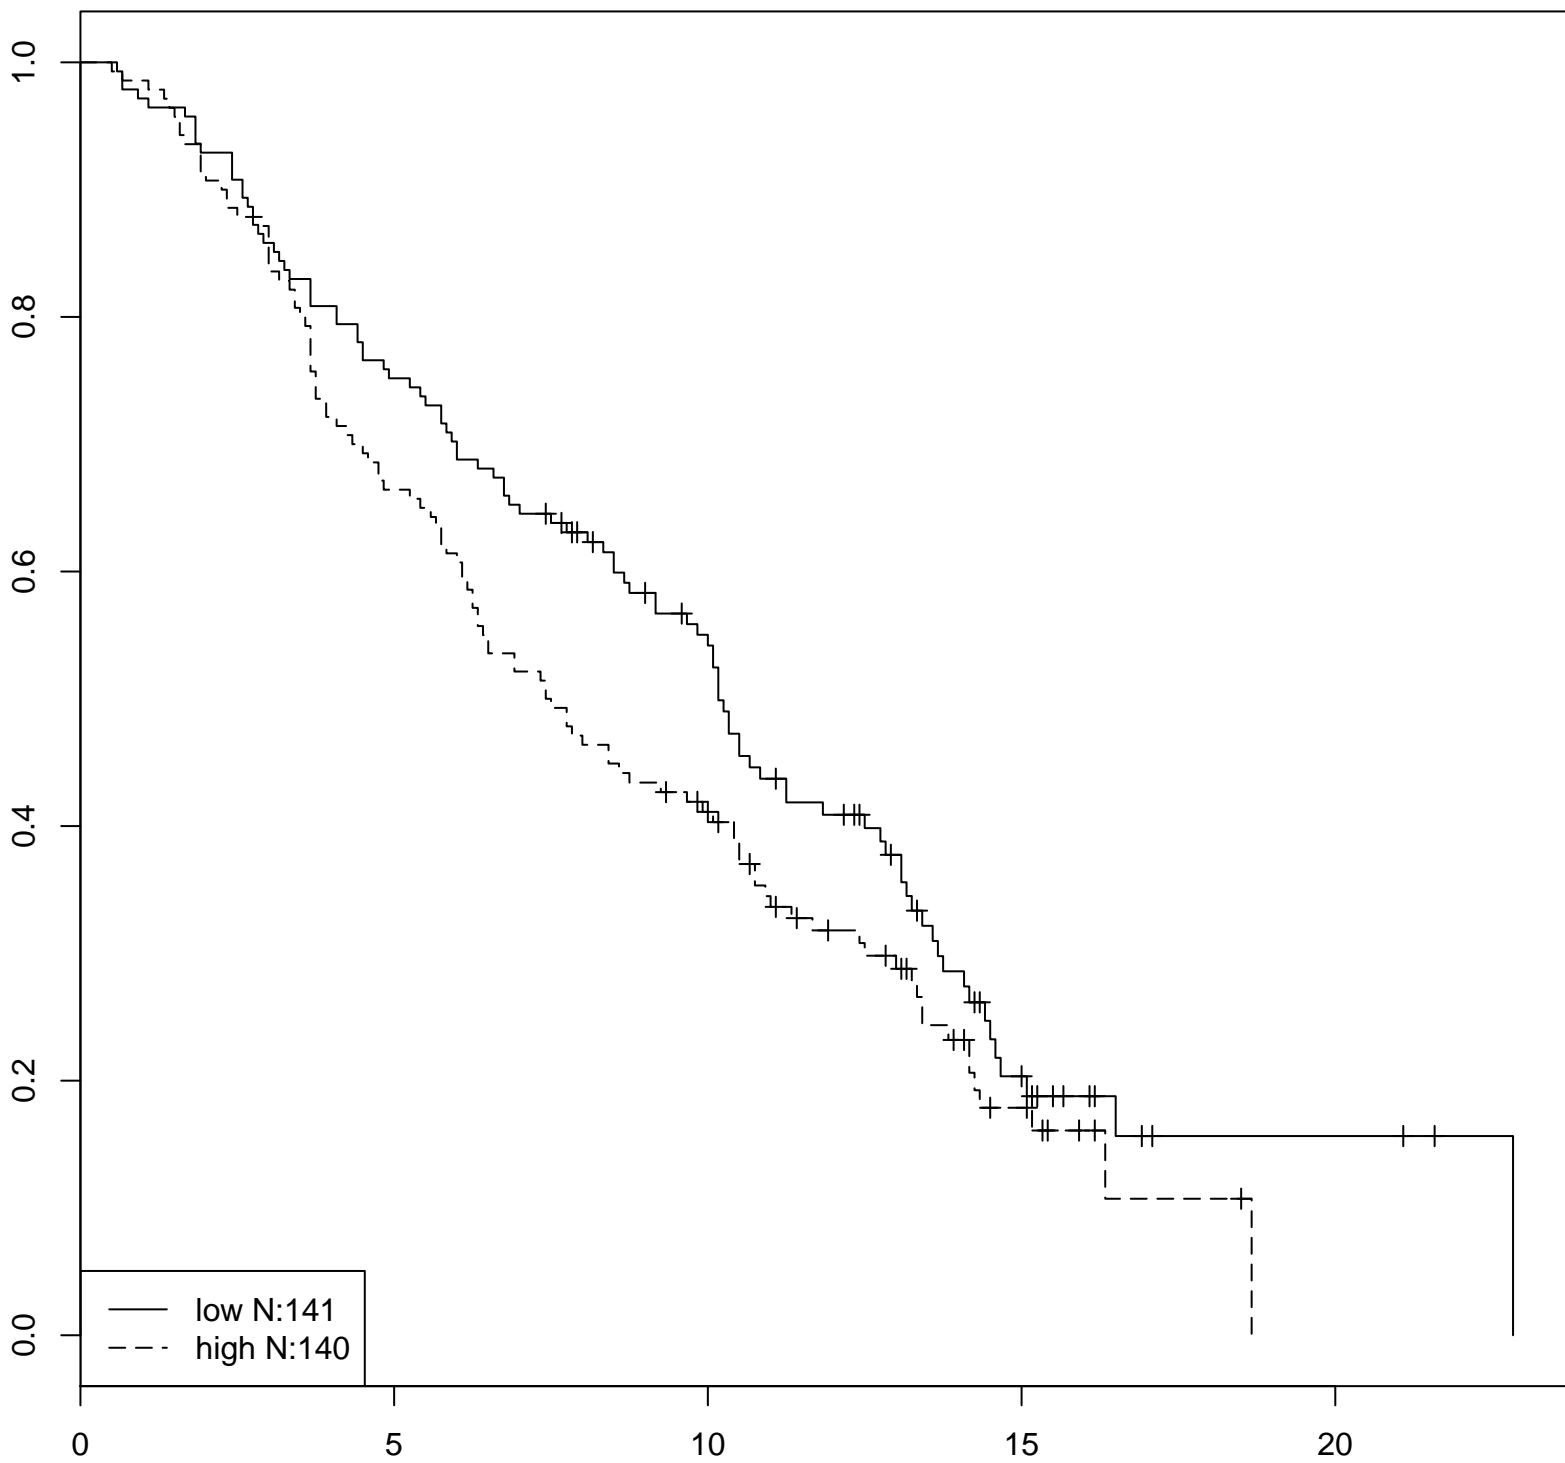

years

log-rank test p-value = 0.068



# Survival by ETV1 expression

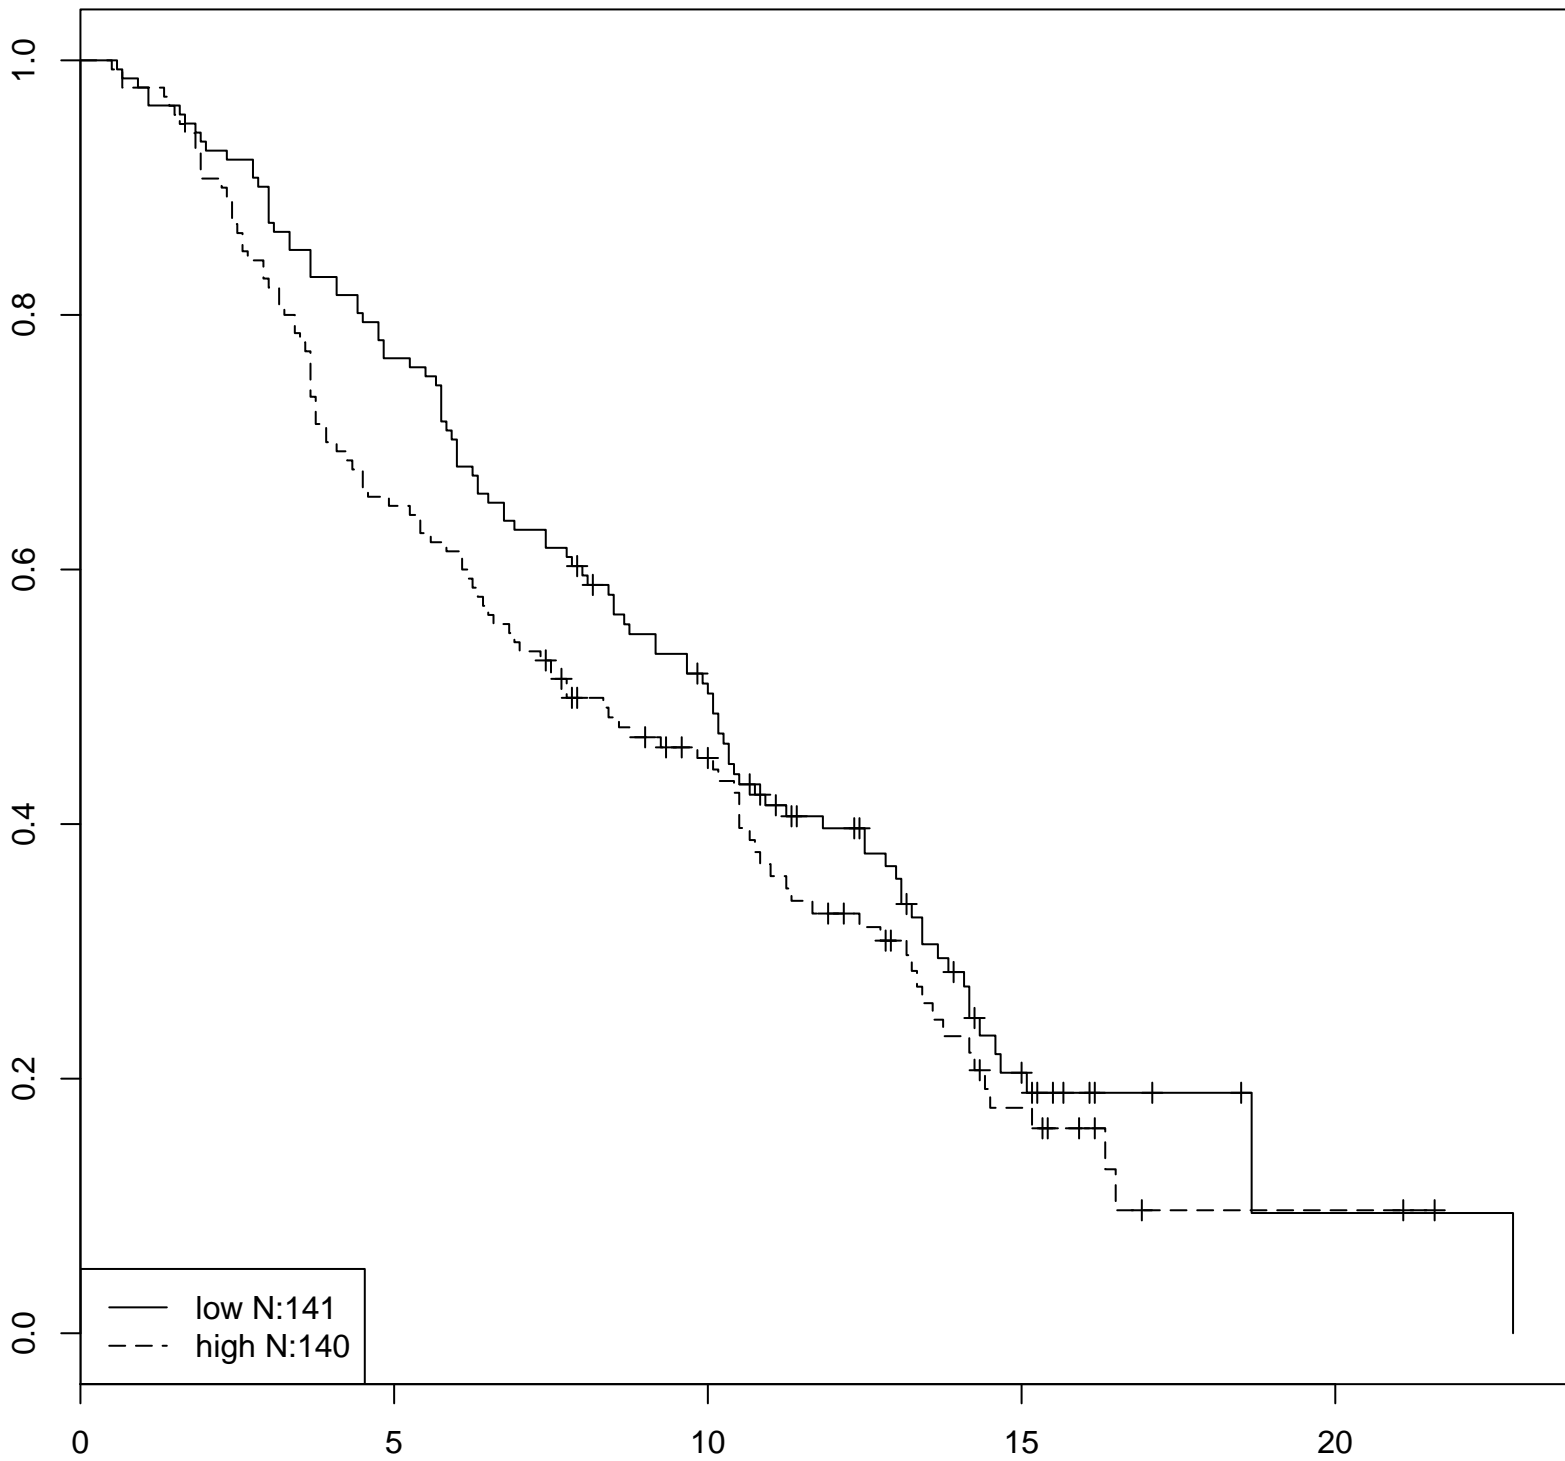

years

log-rank test p-value = 0.182

# Survival by EZH2 expression

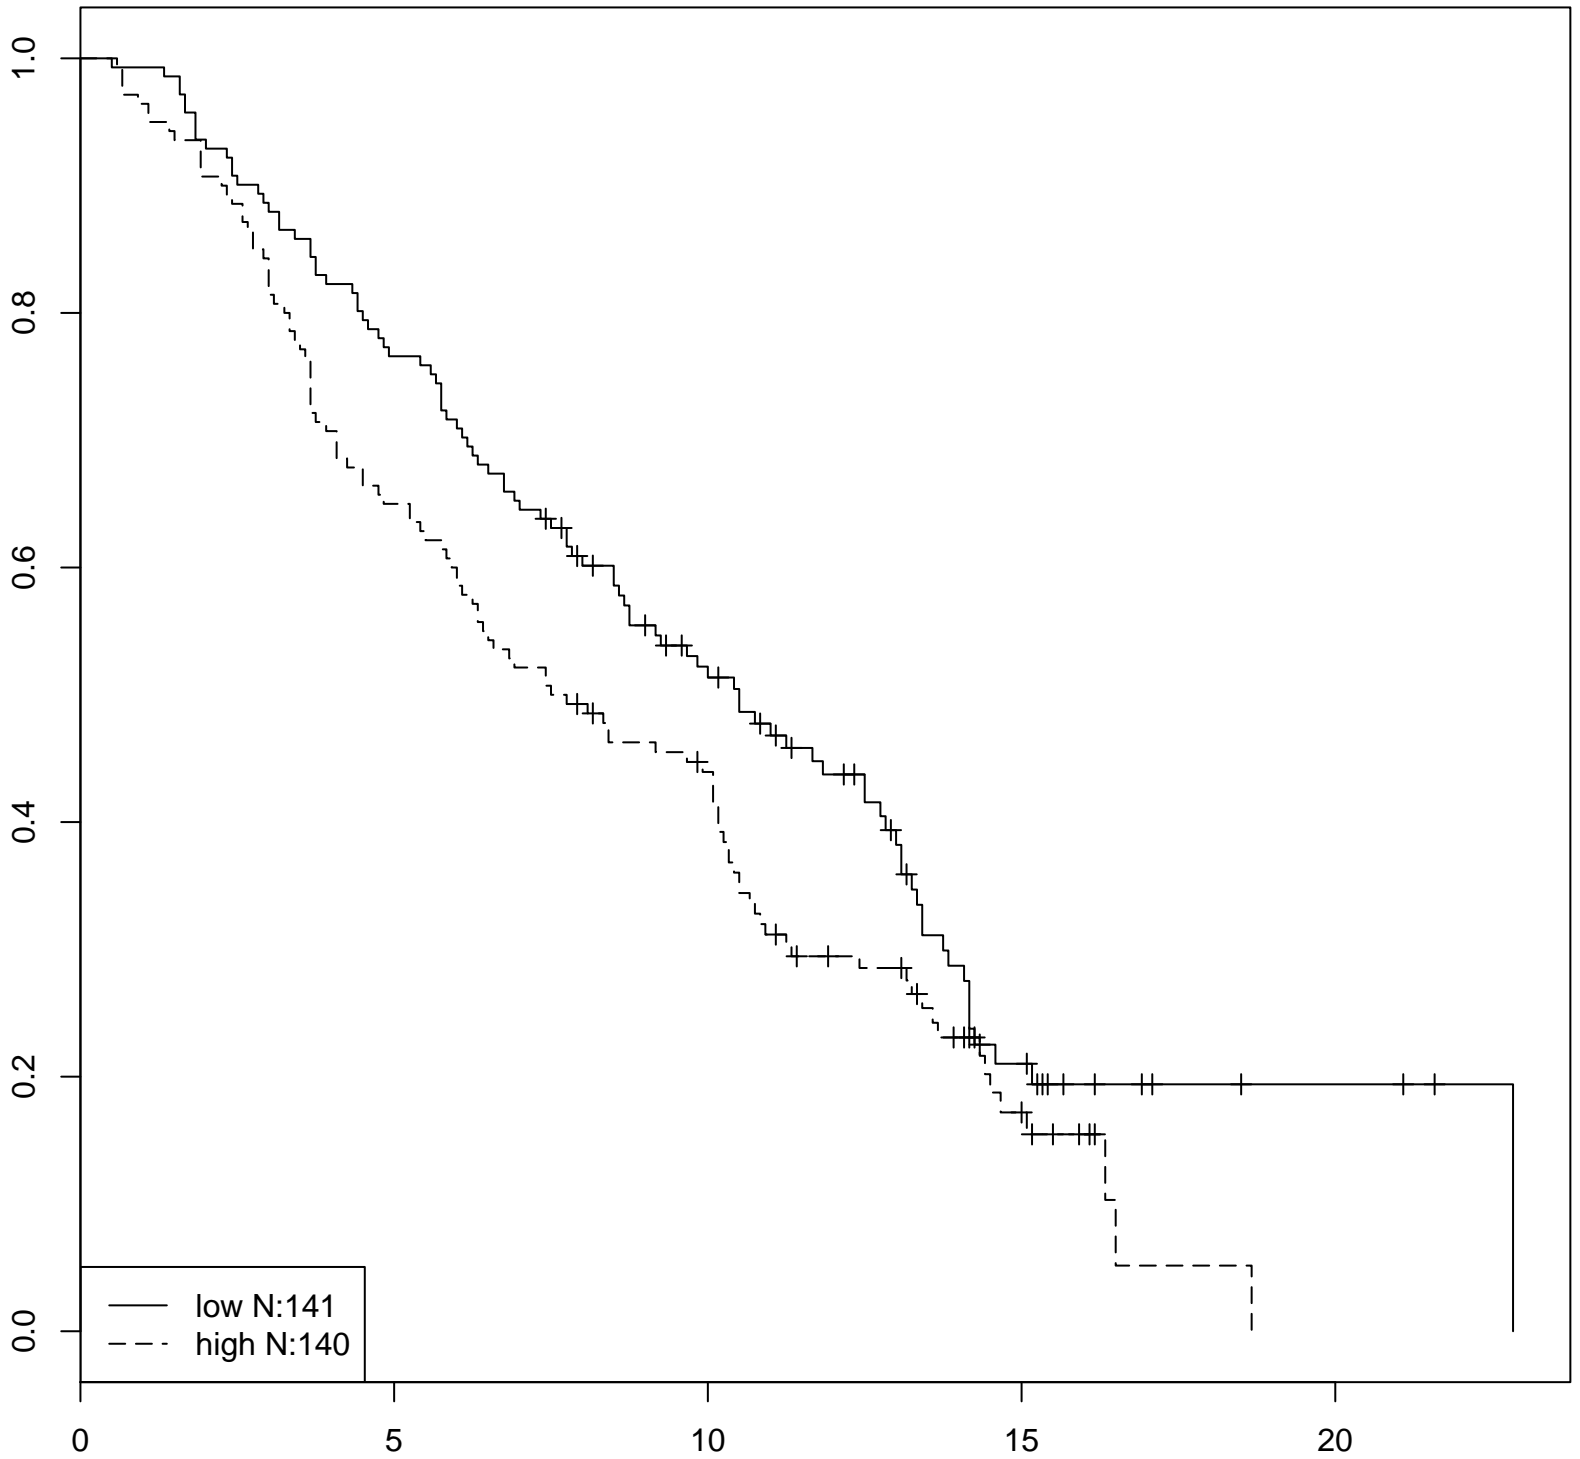

years

log-rank test p-value = 0.028

# Survival by FASN expression

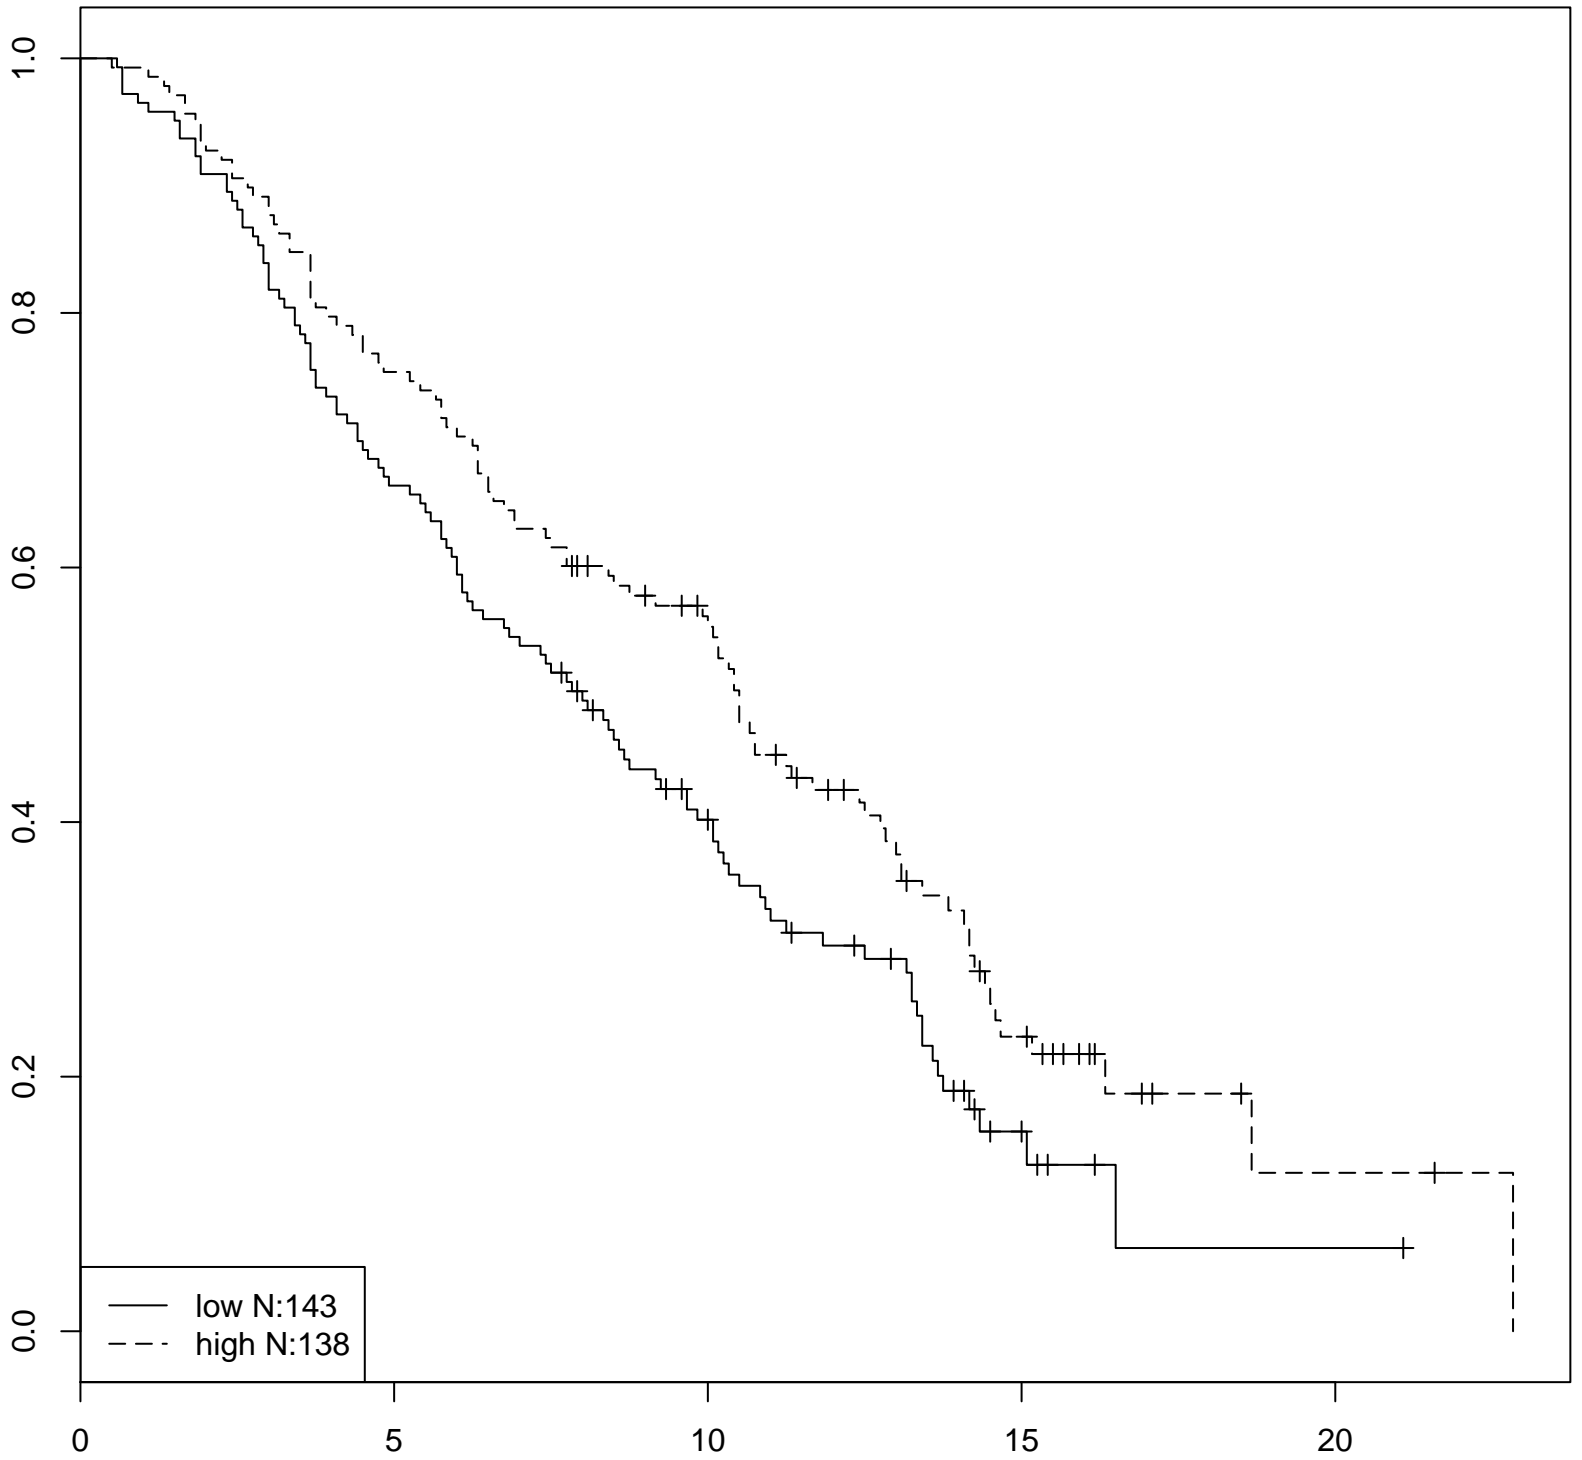

years

log-rank test p-value = 0.017

# Survival by FBP1 expression

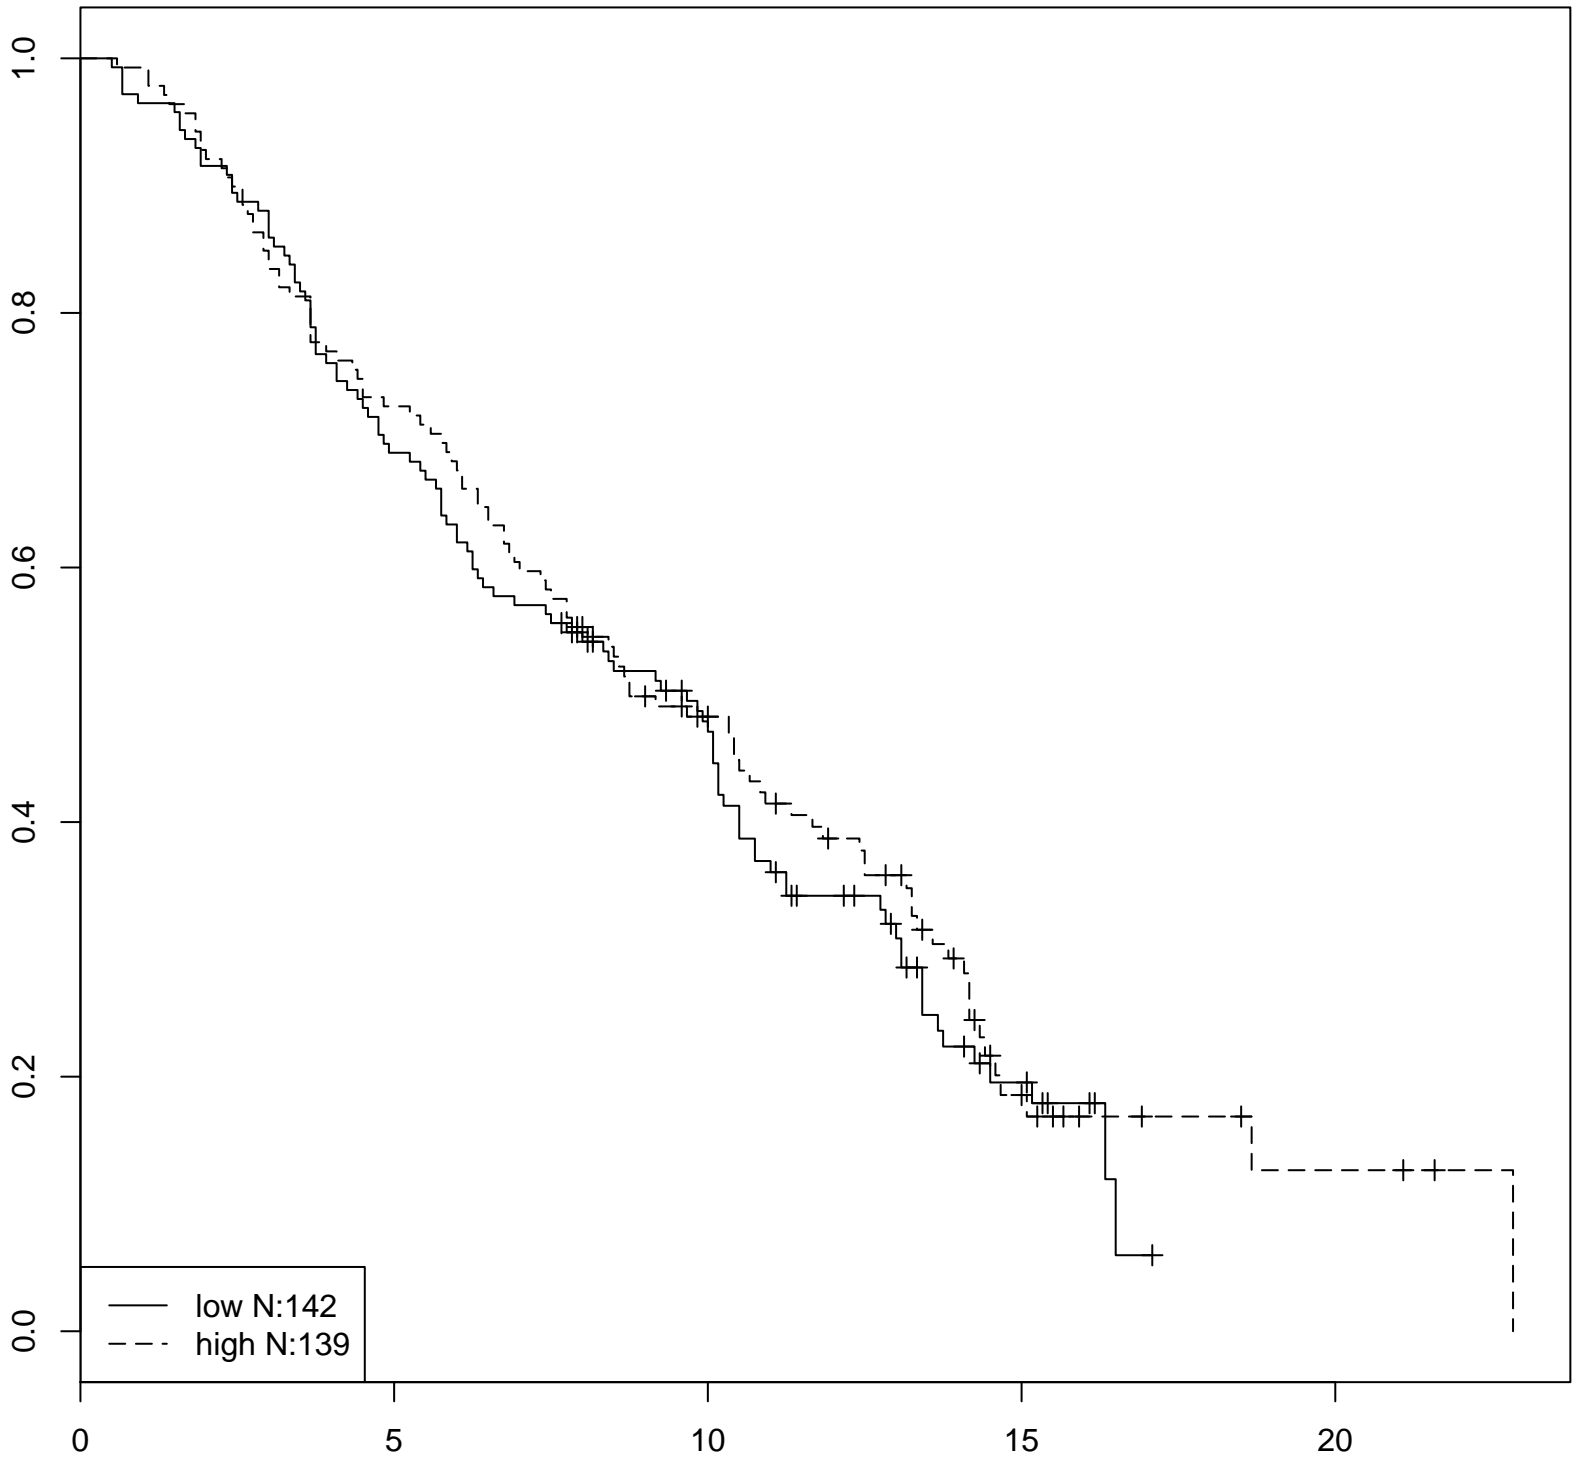

years

log-rank test p-value = 0.491

# Survival by FEN1 expression

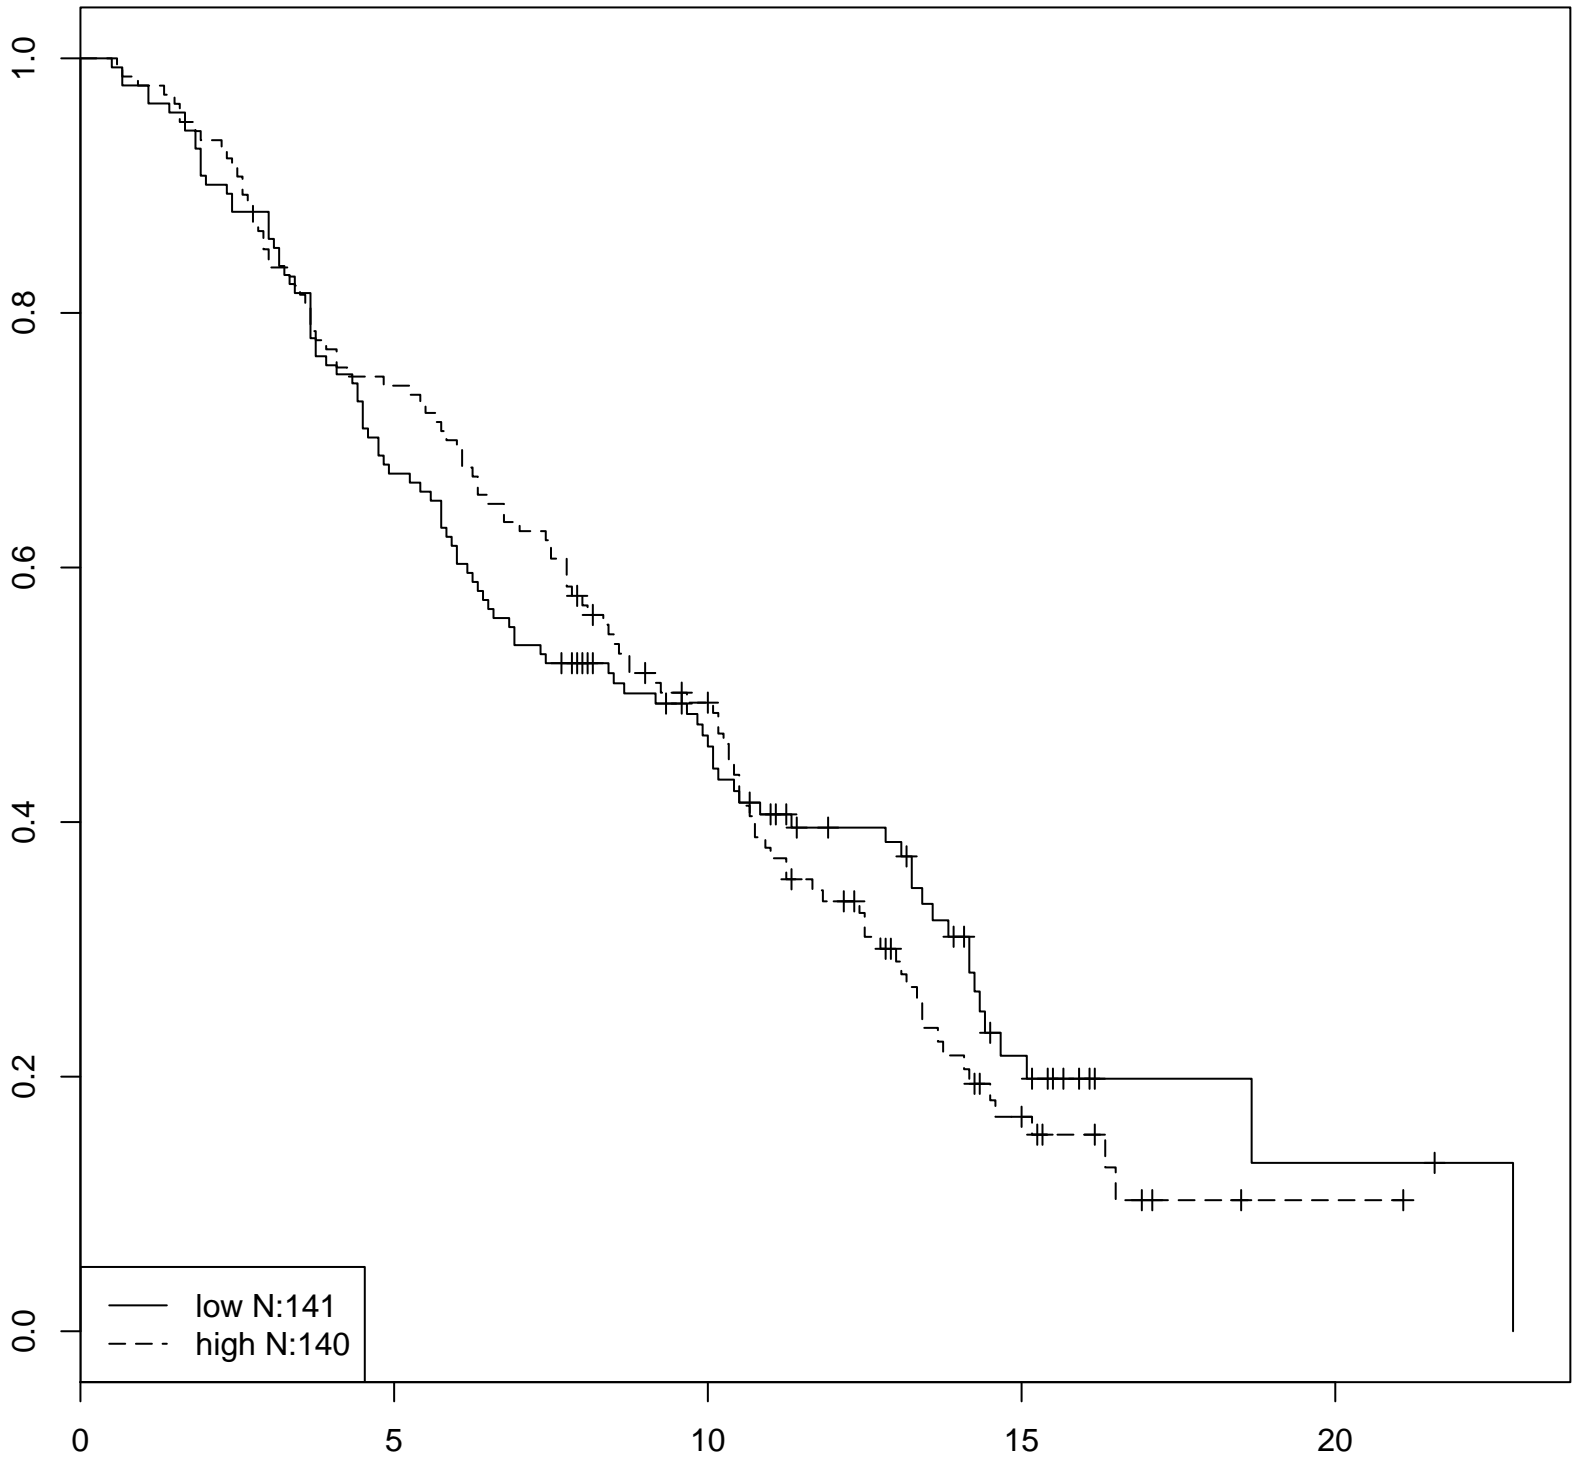

# Survival by FGFR1 expression

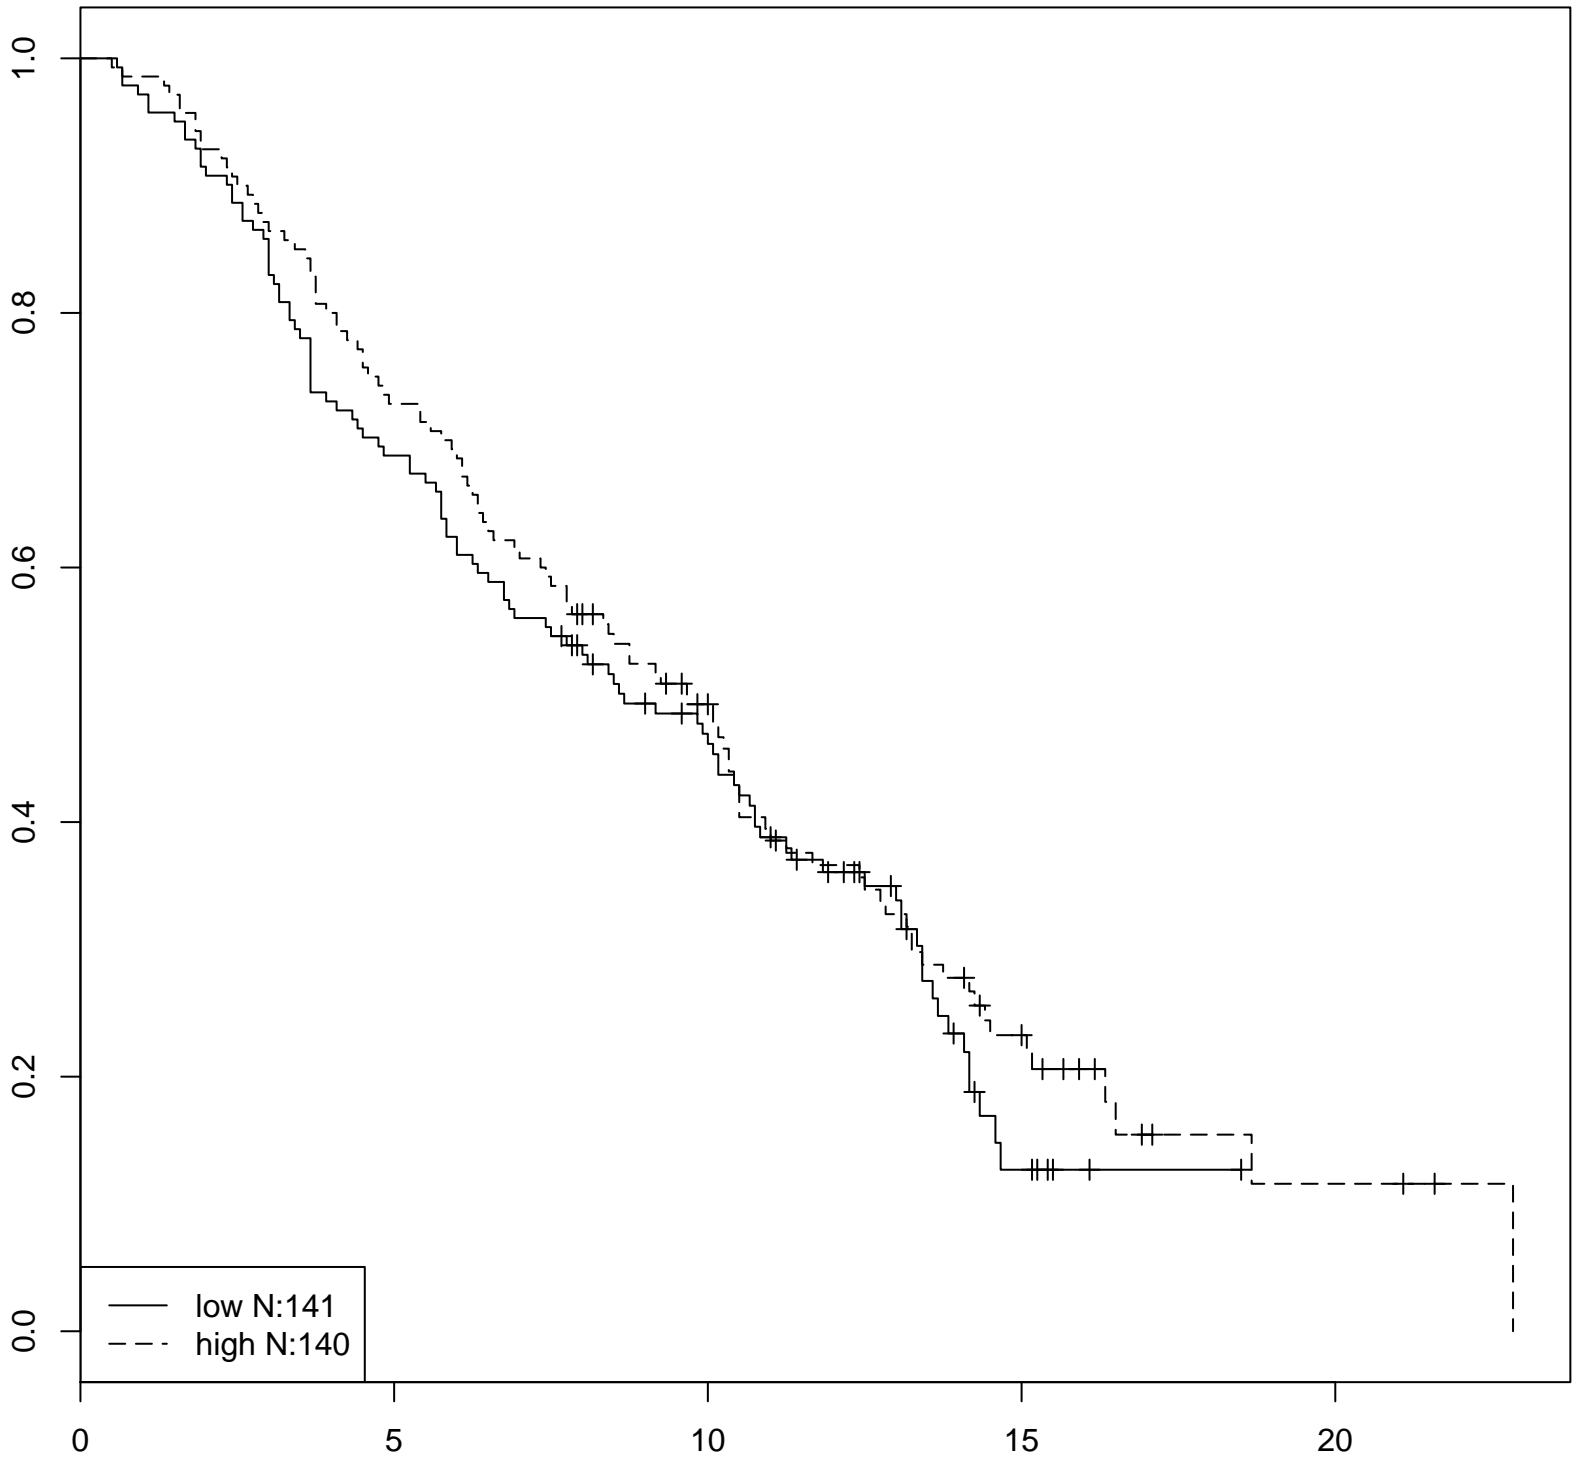

years

log-rank test p-value = 0.361

# Survival by FKBP4 expression

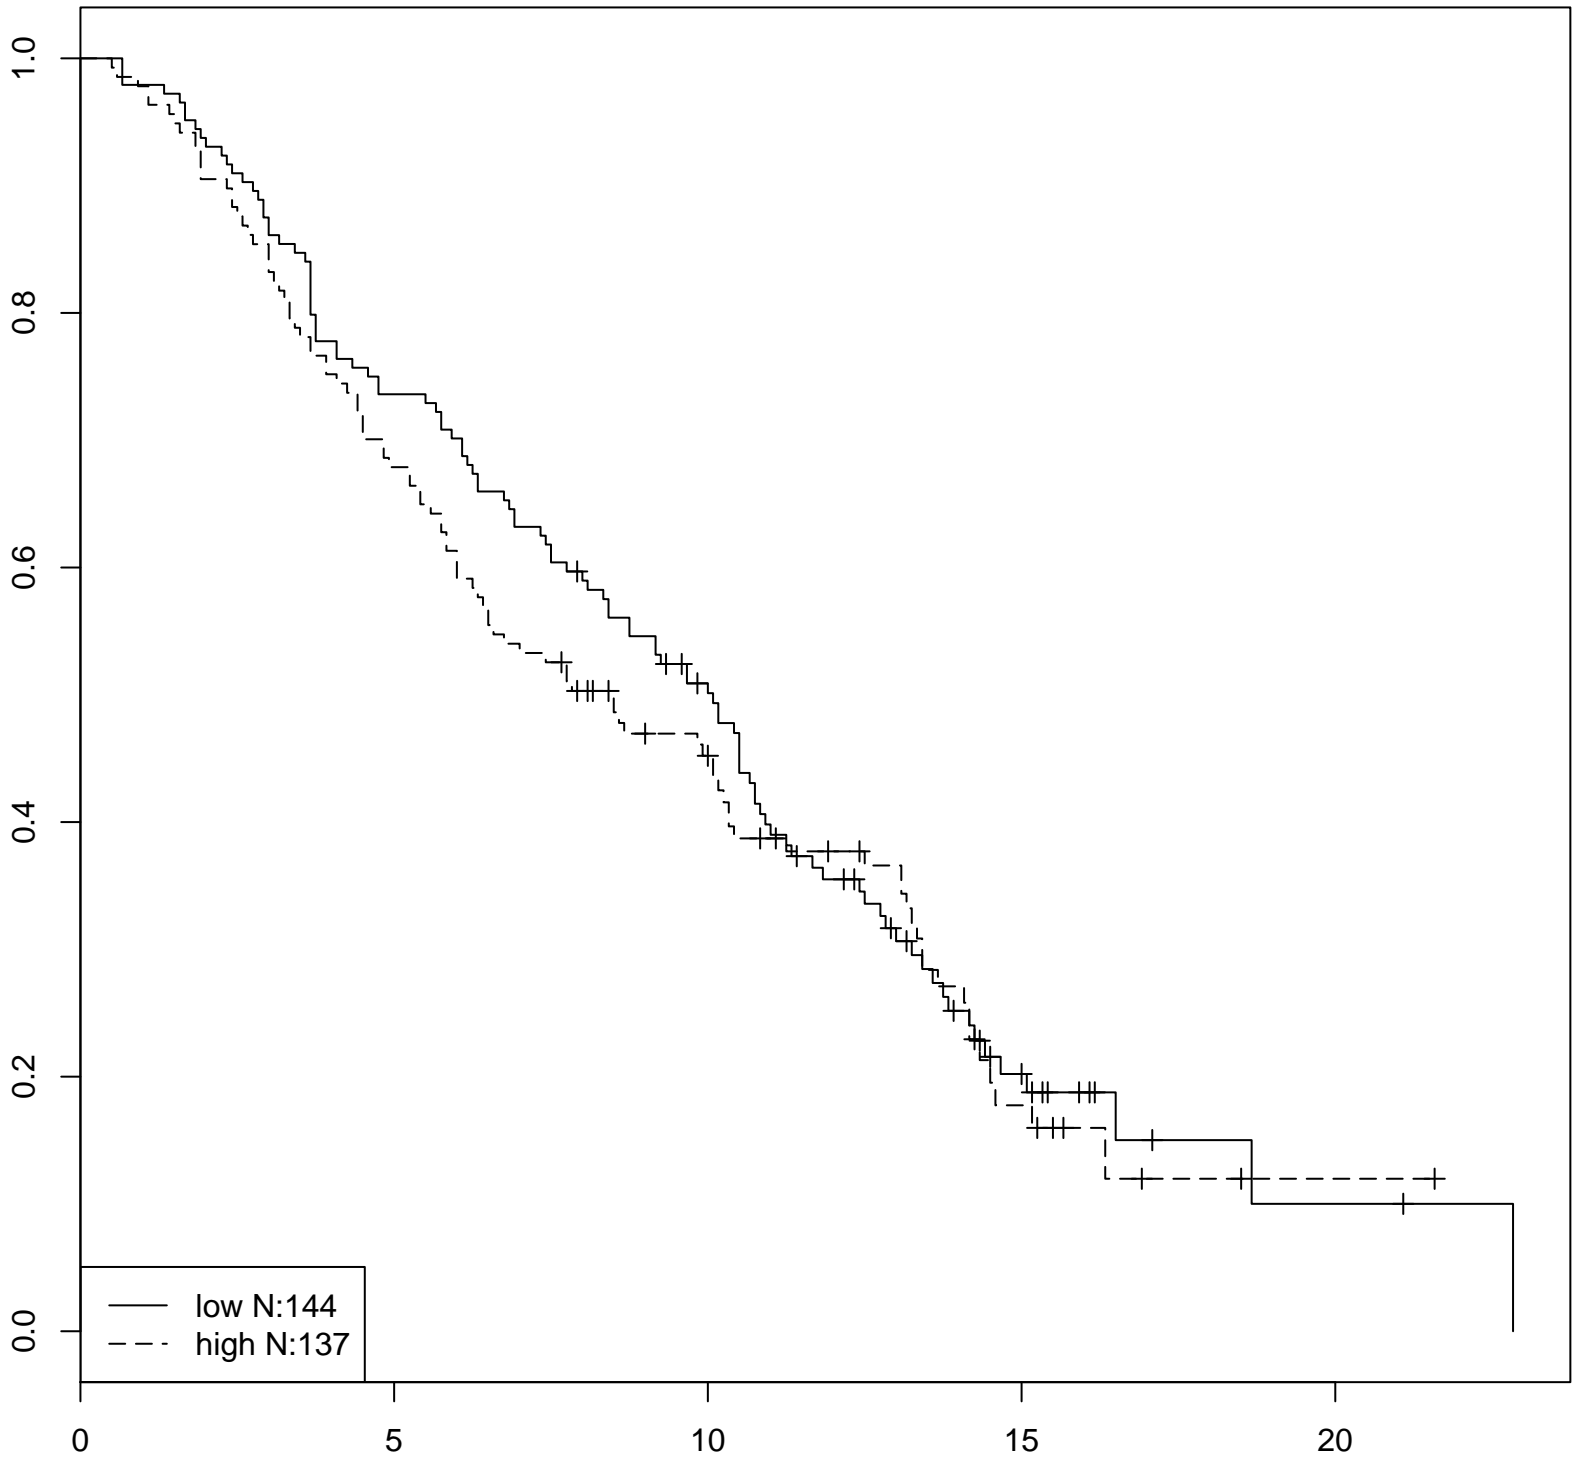

years

log-rank test p-value = 0.493

# Survival by FLNC expression

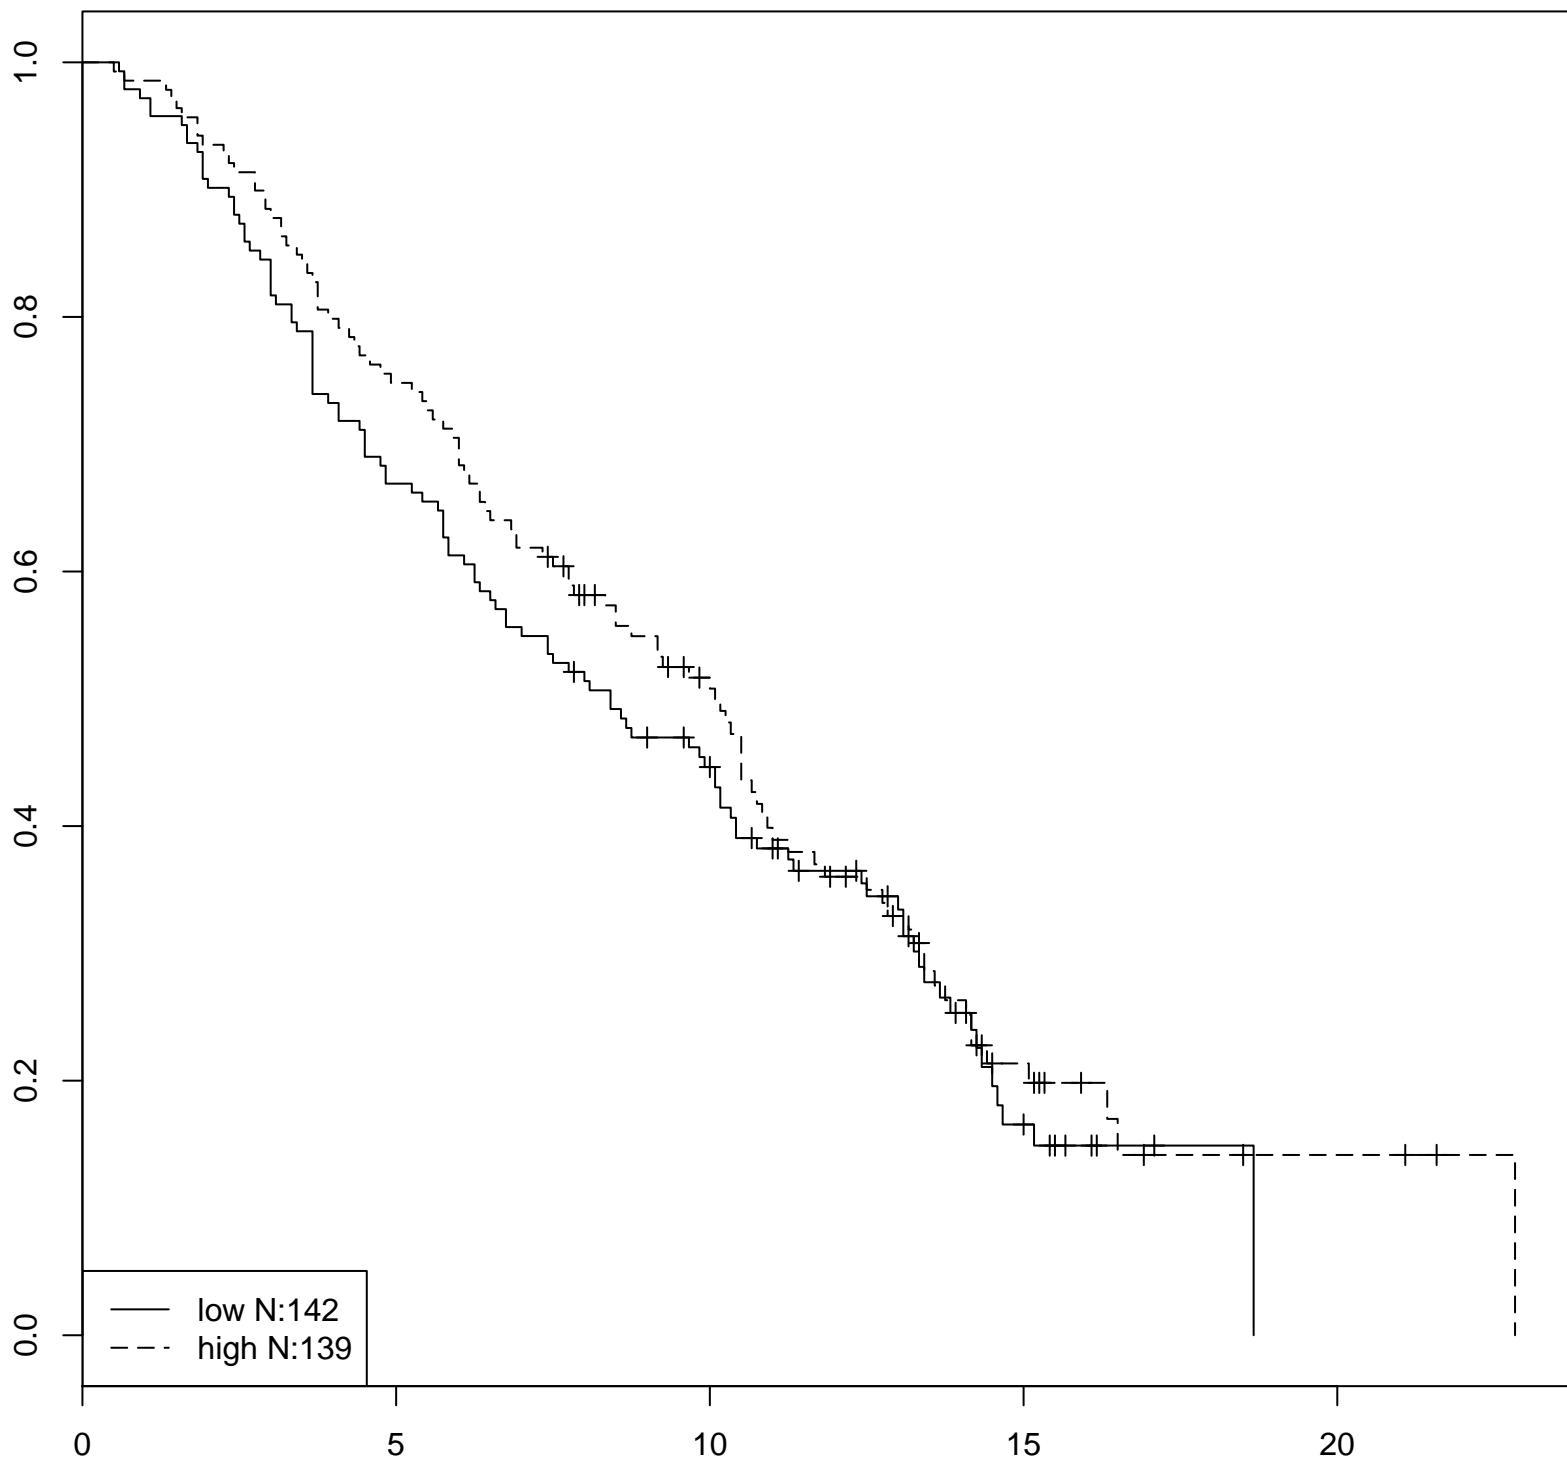

years

log-rank test p-value = 0.335



# Survival by FOLH1 expression

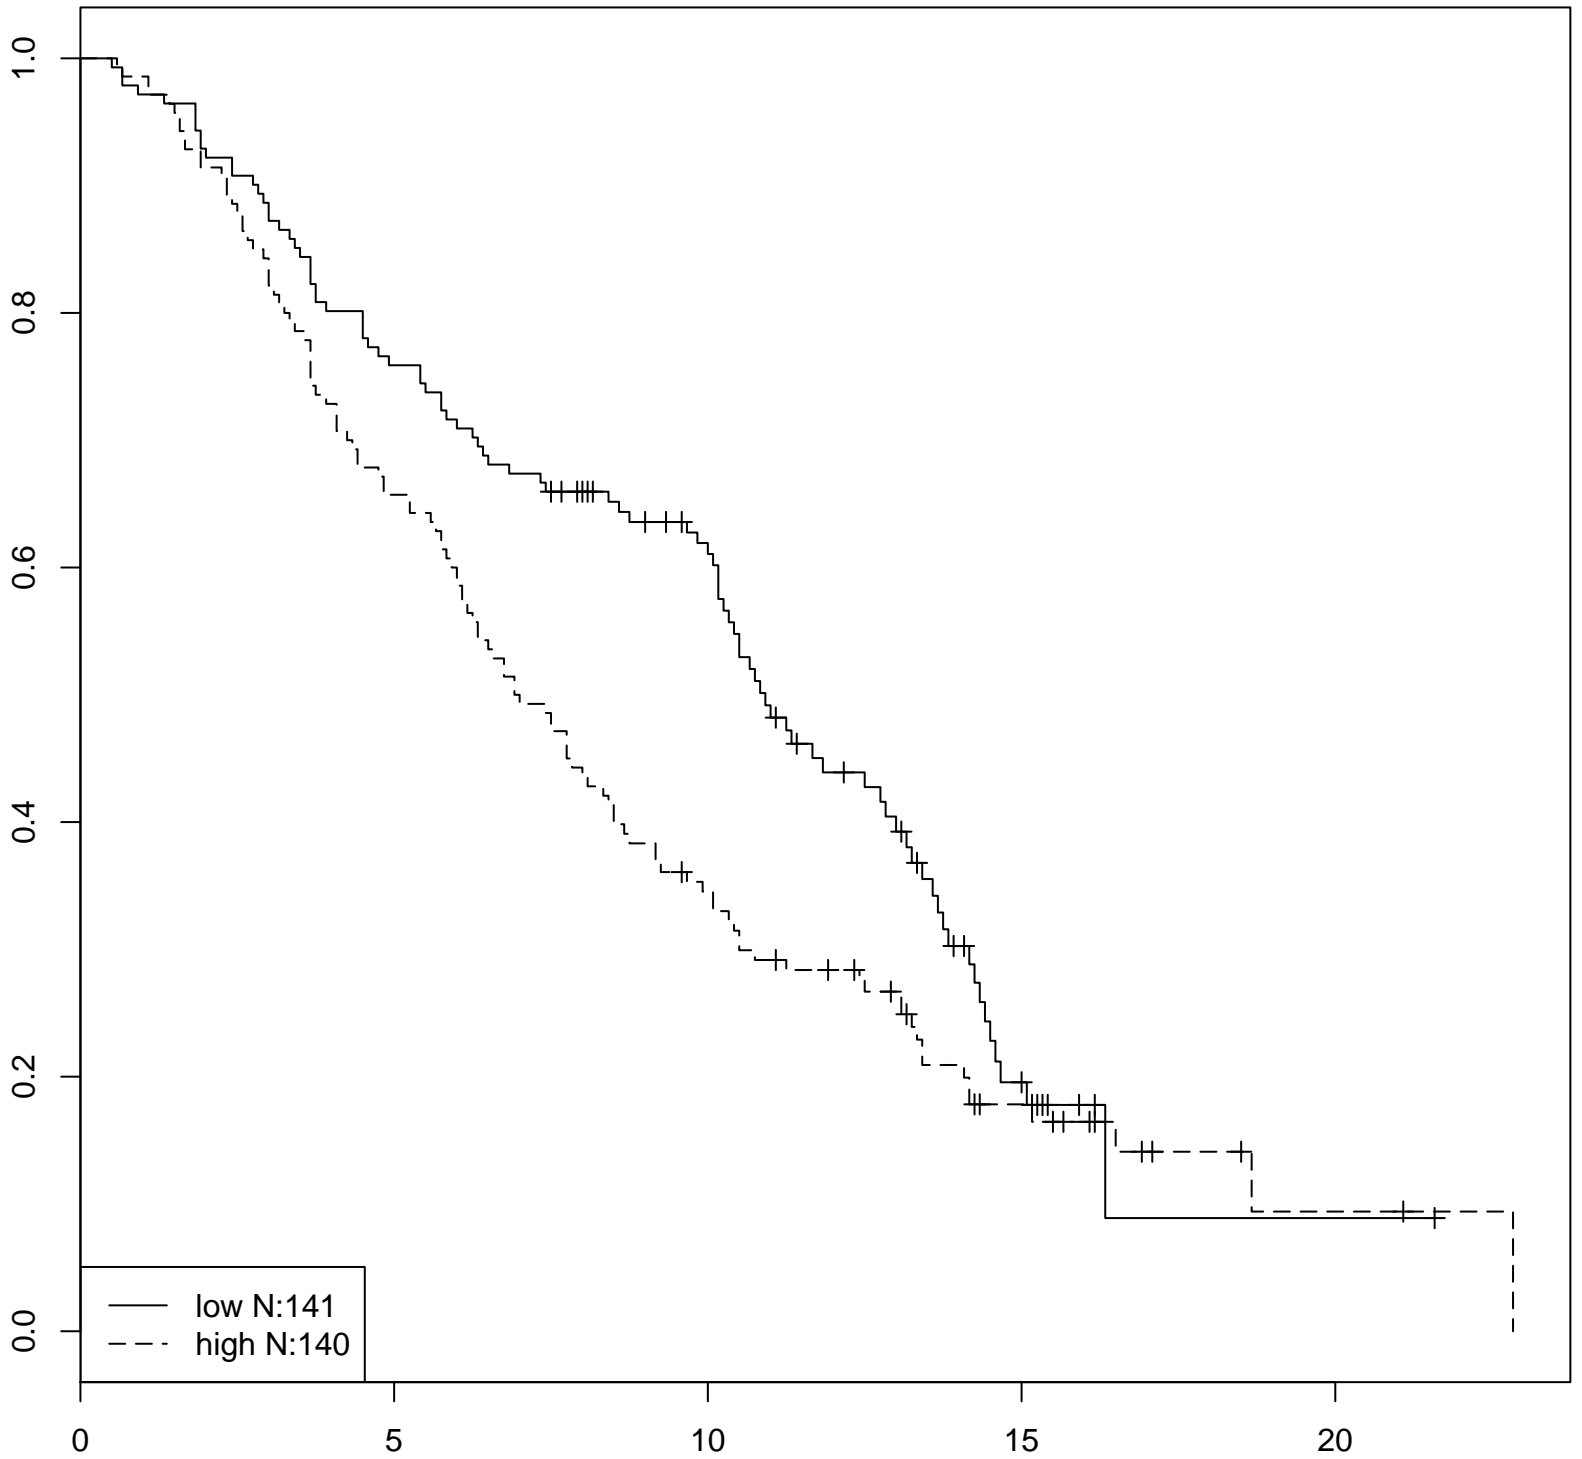

years

log-rank test p-value = 0.008

# Survival by FRZB expression

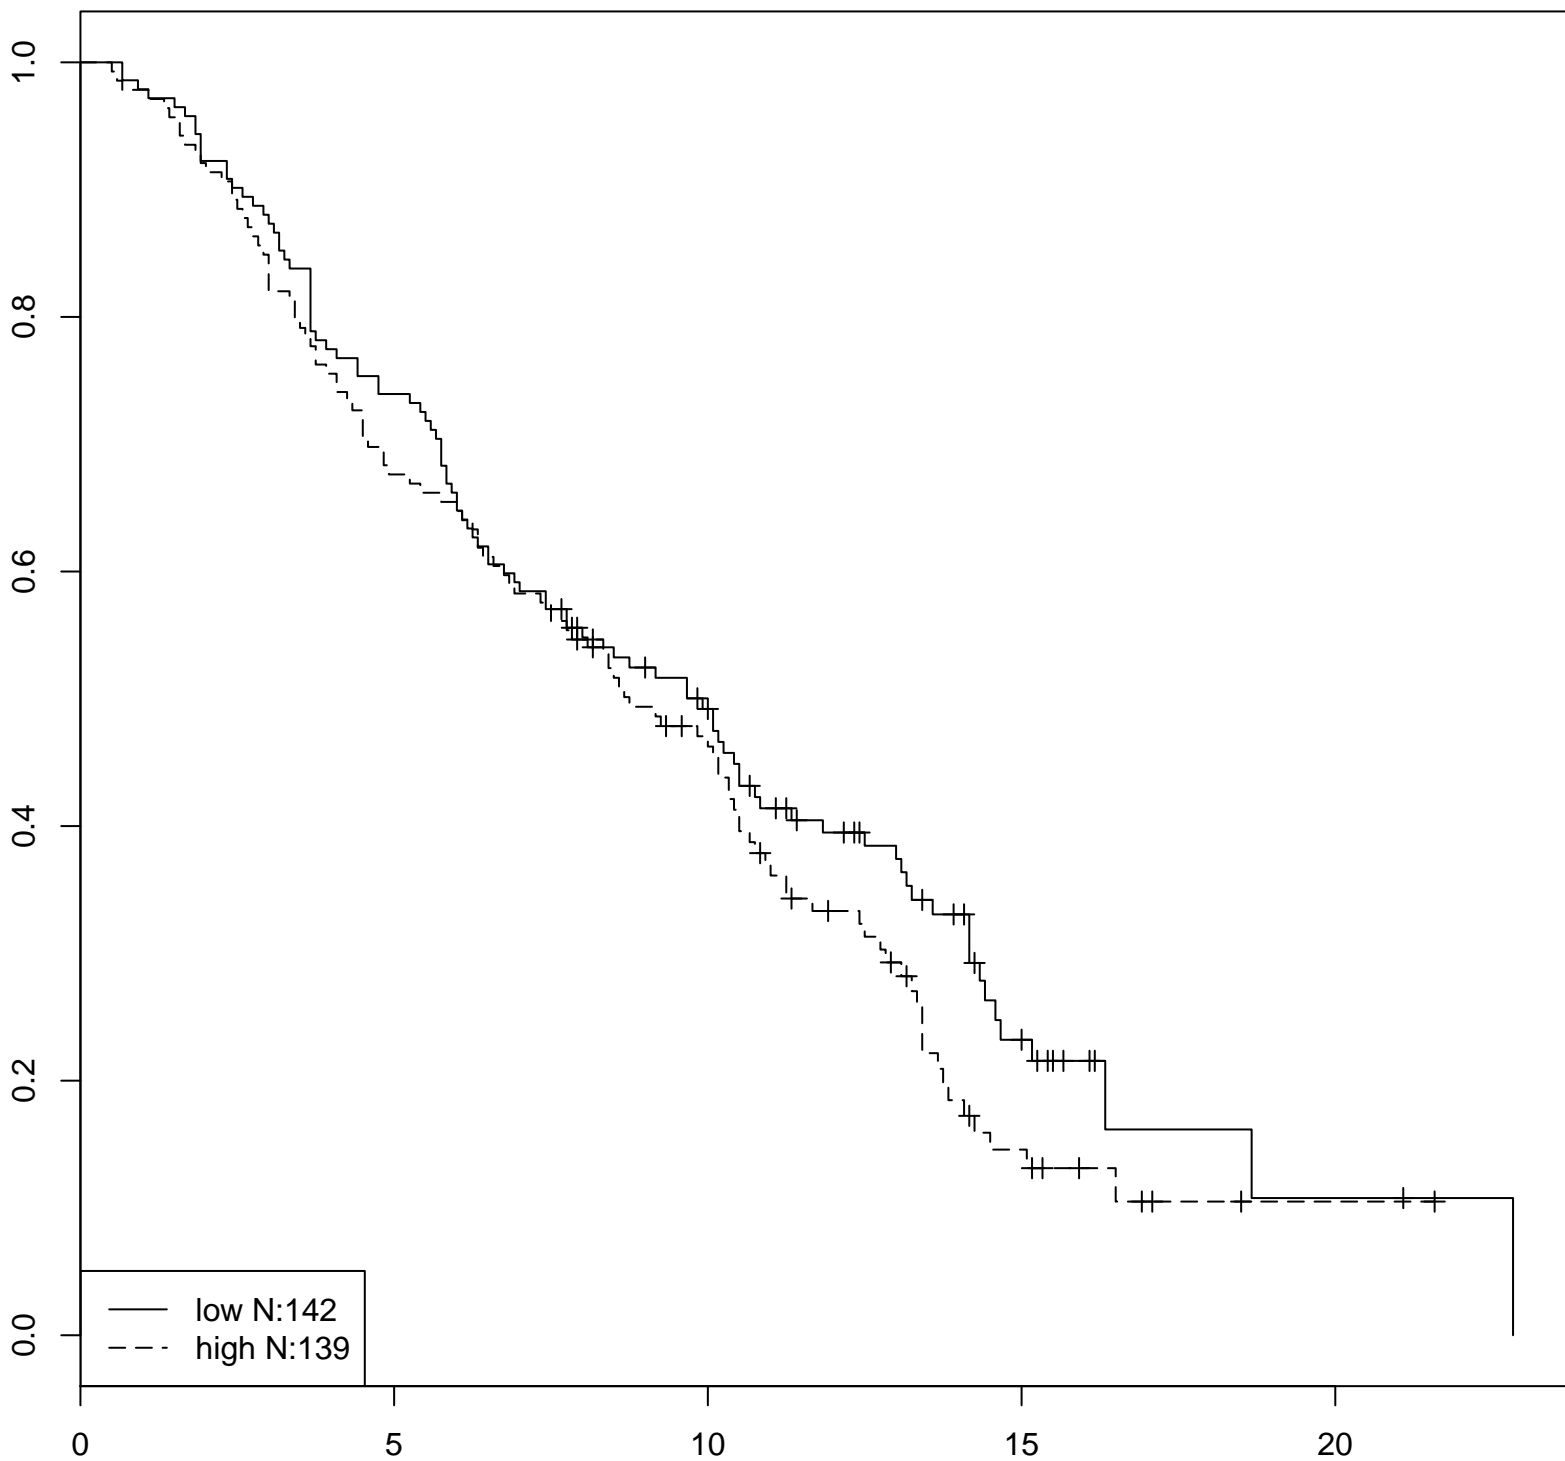

years

log-rank test p-value = 0.176

# Survival by FSCN1 expression

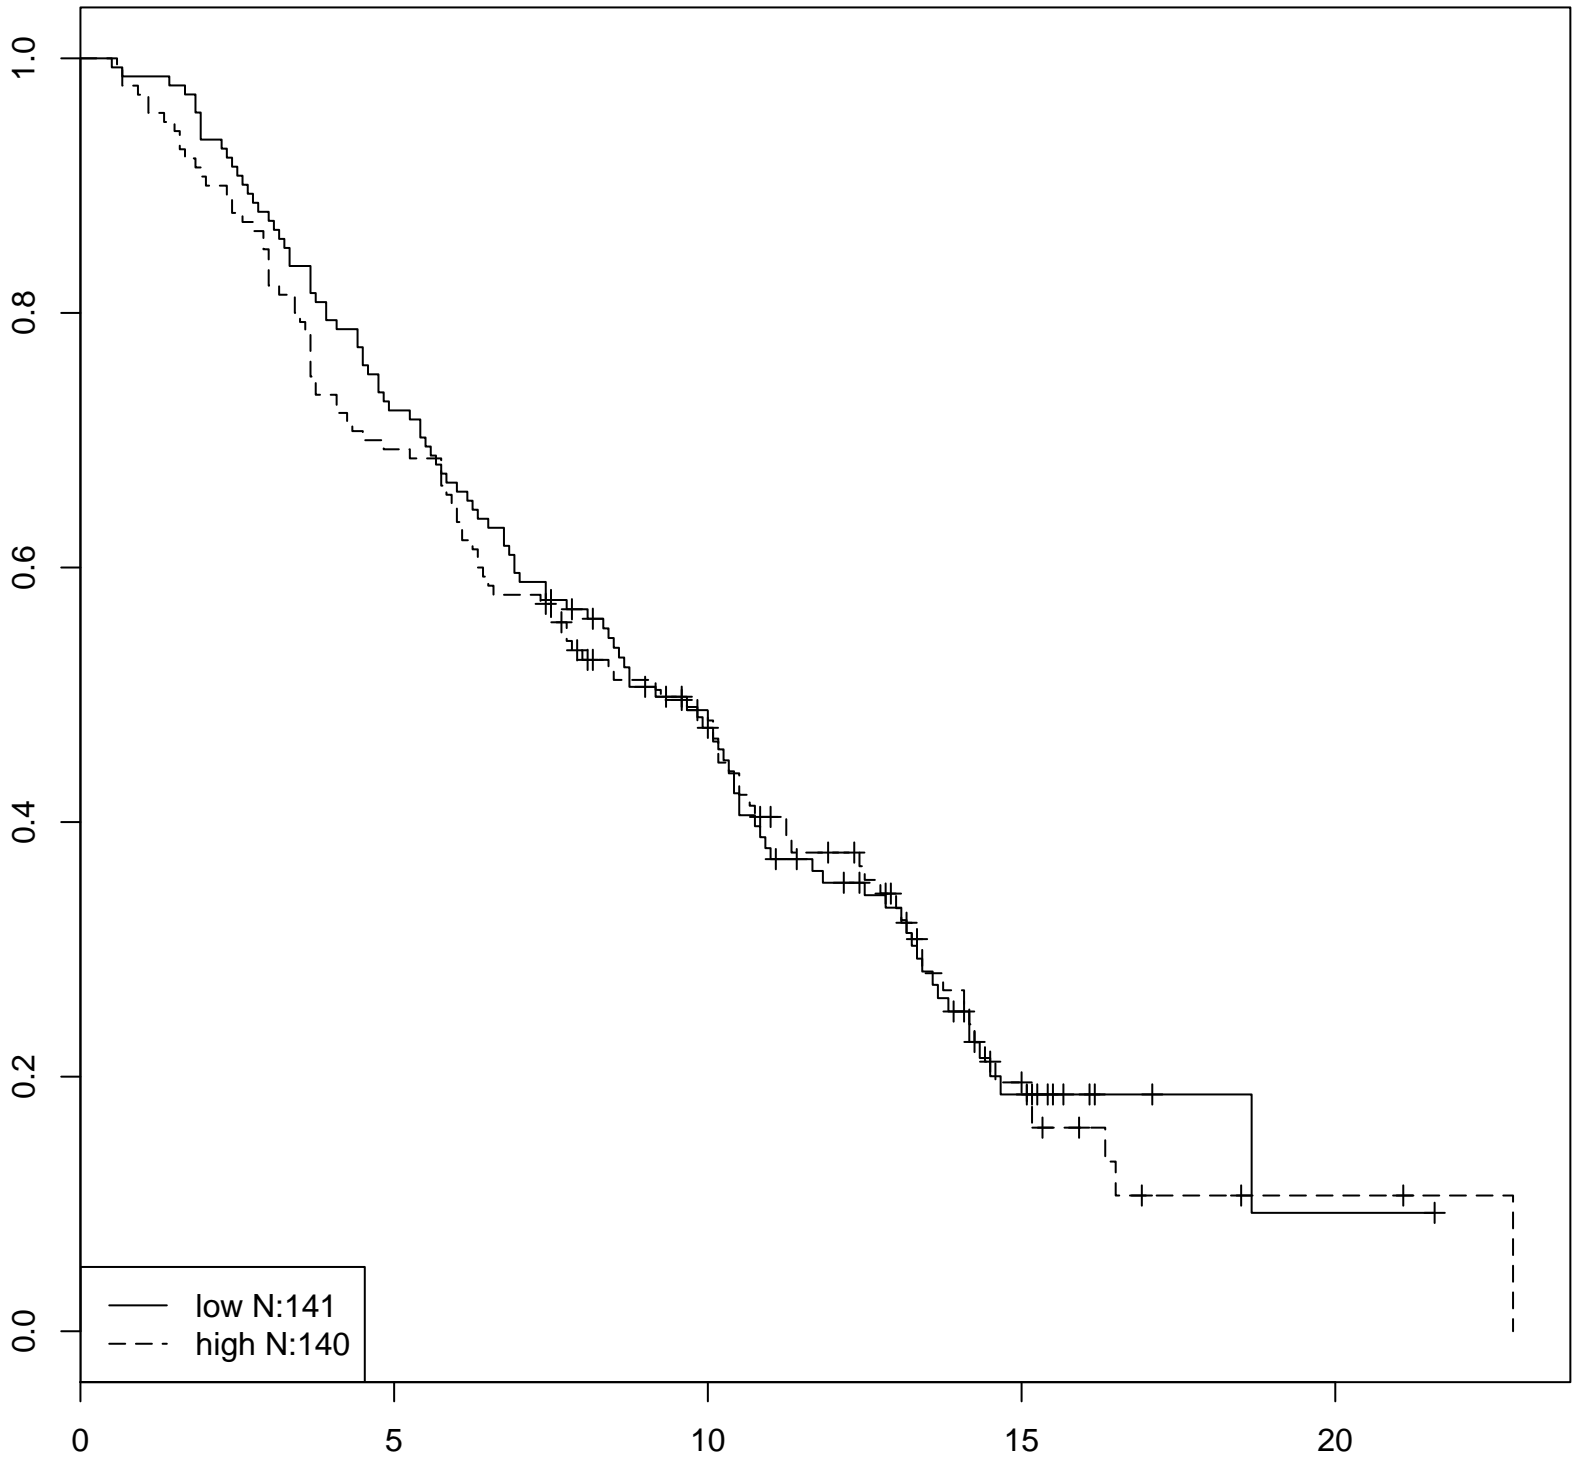

# Survival by FST expression

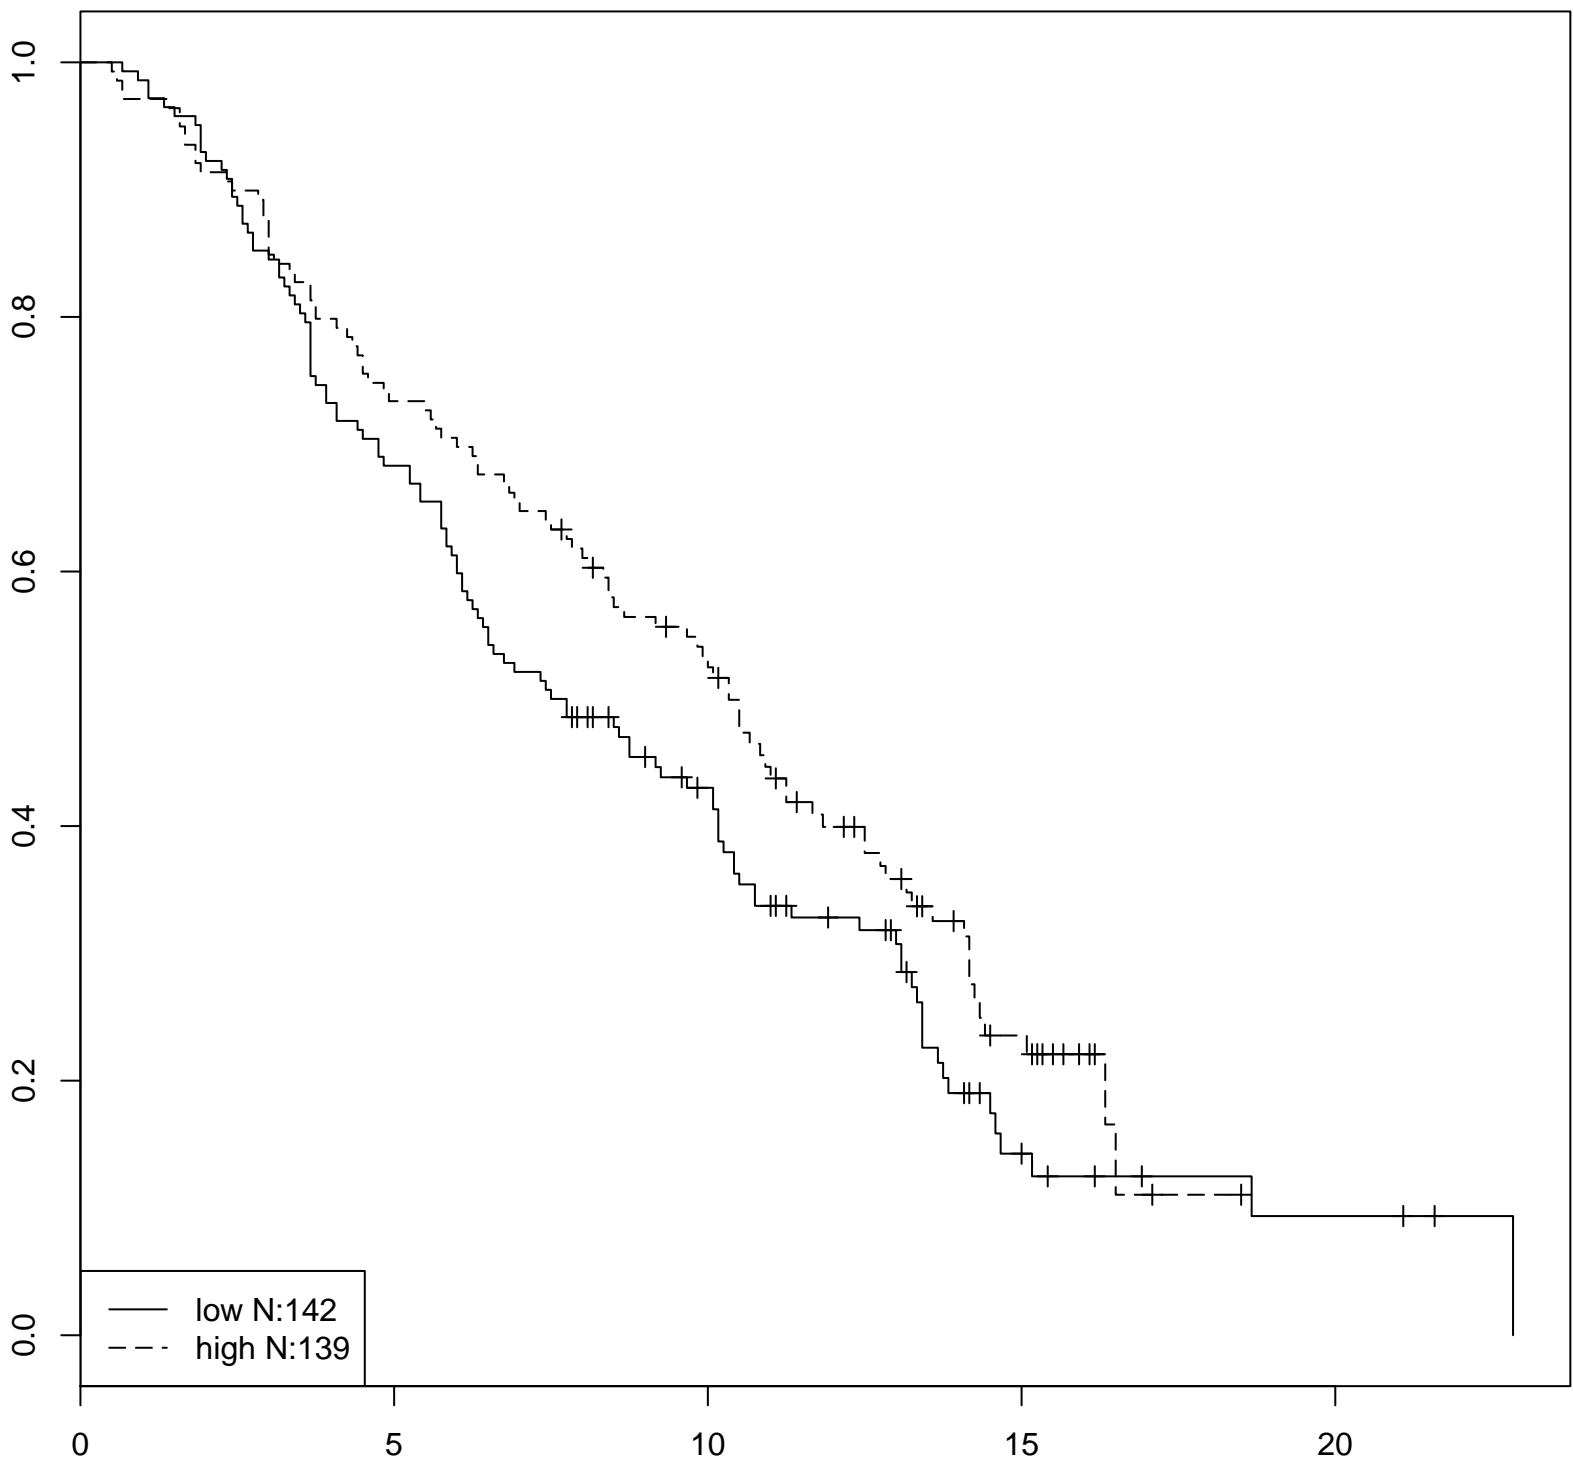

years

log-rank test p-value = 0.068

# Survival by GAD1 expression

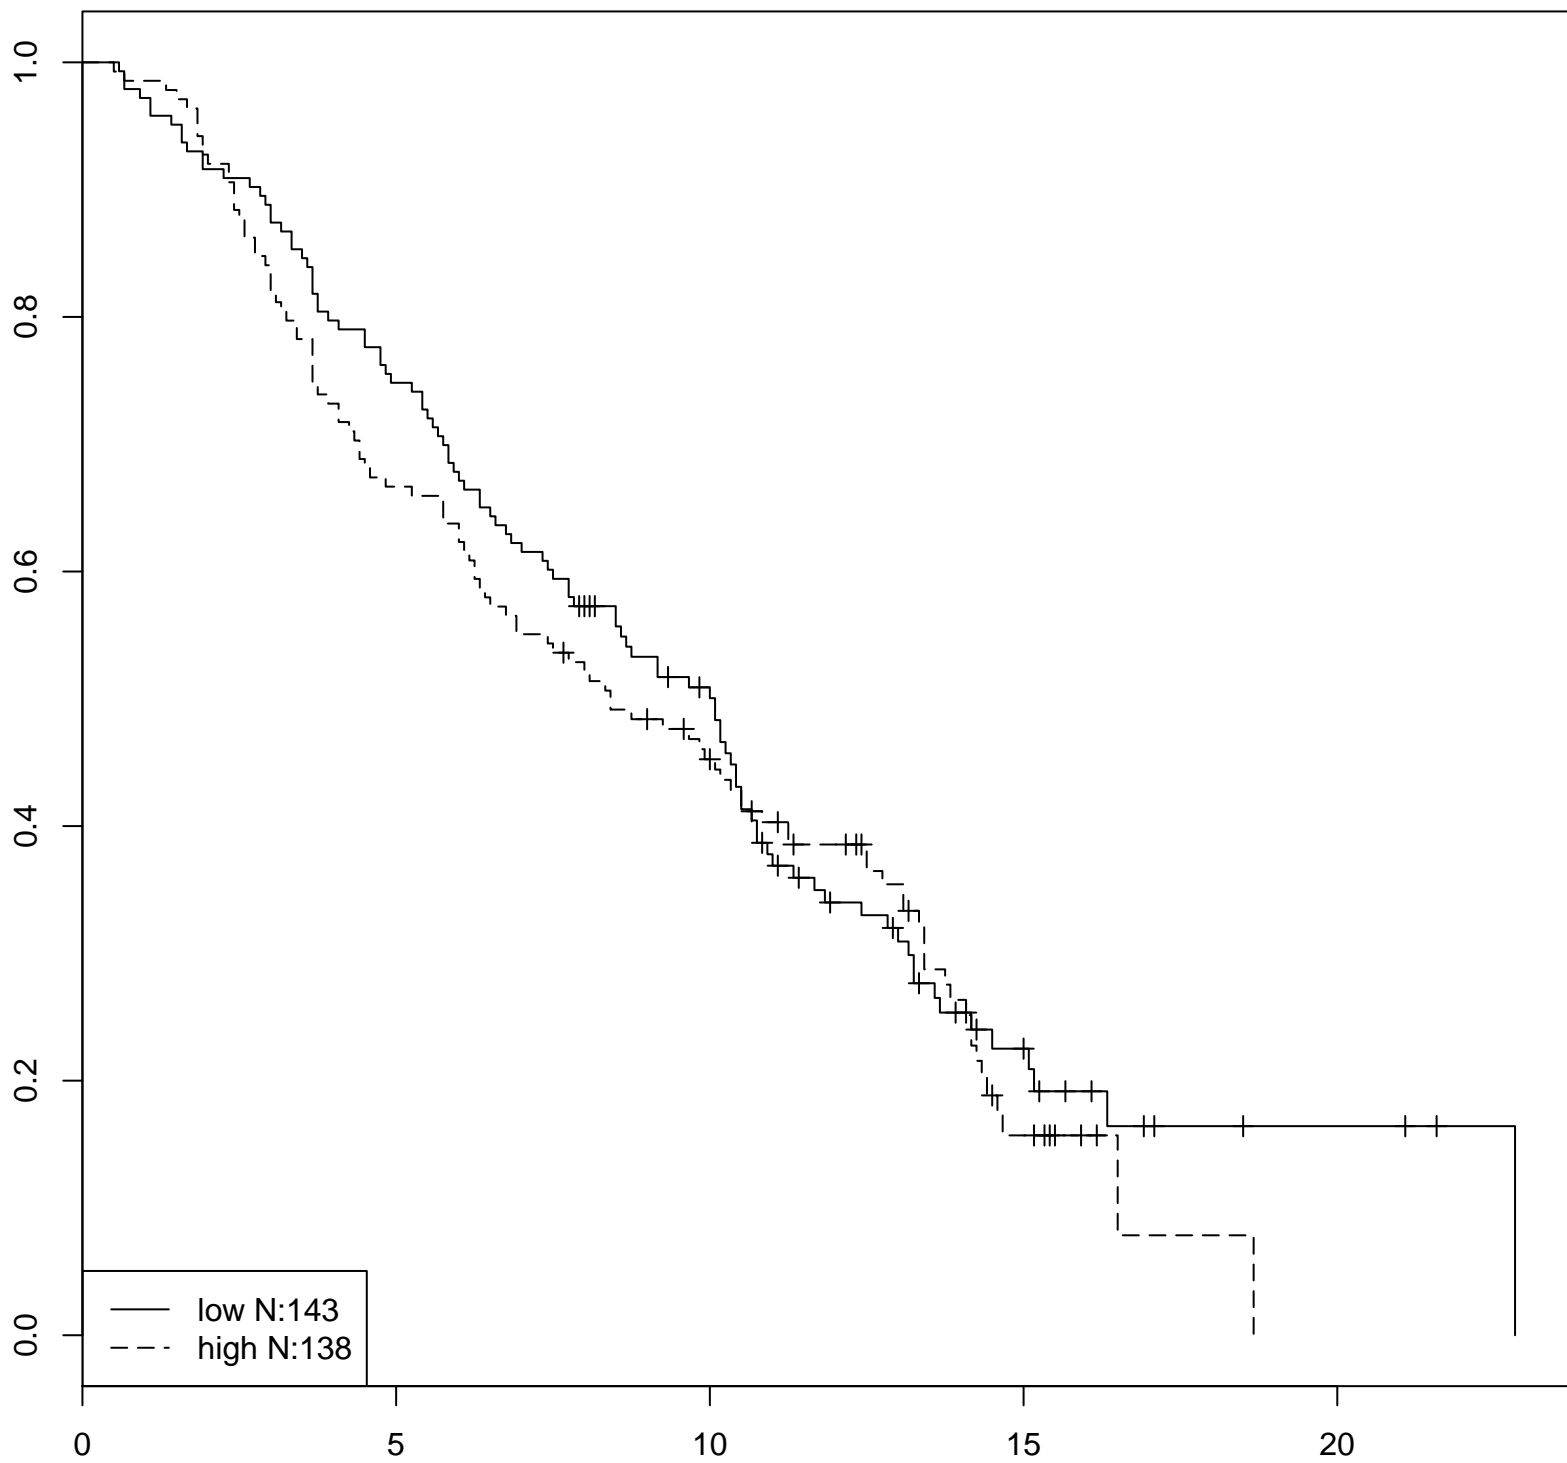

years

log-rank test p-value = 0.467

# Survival by GCK expression

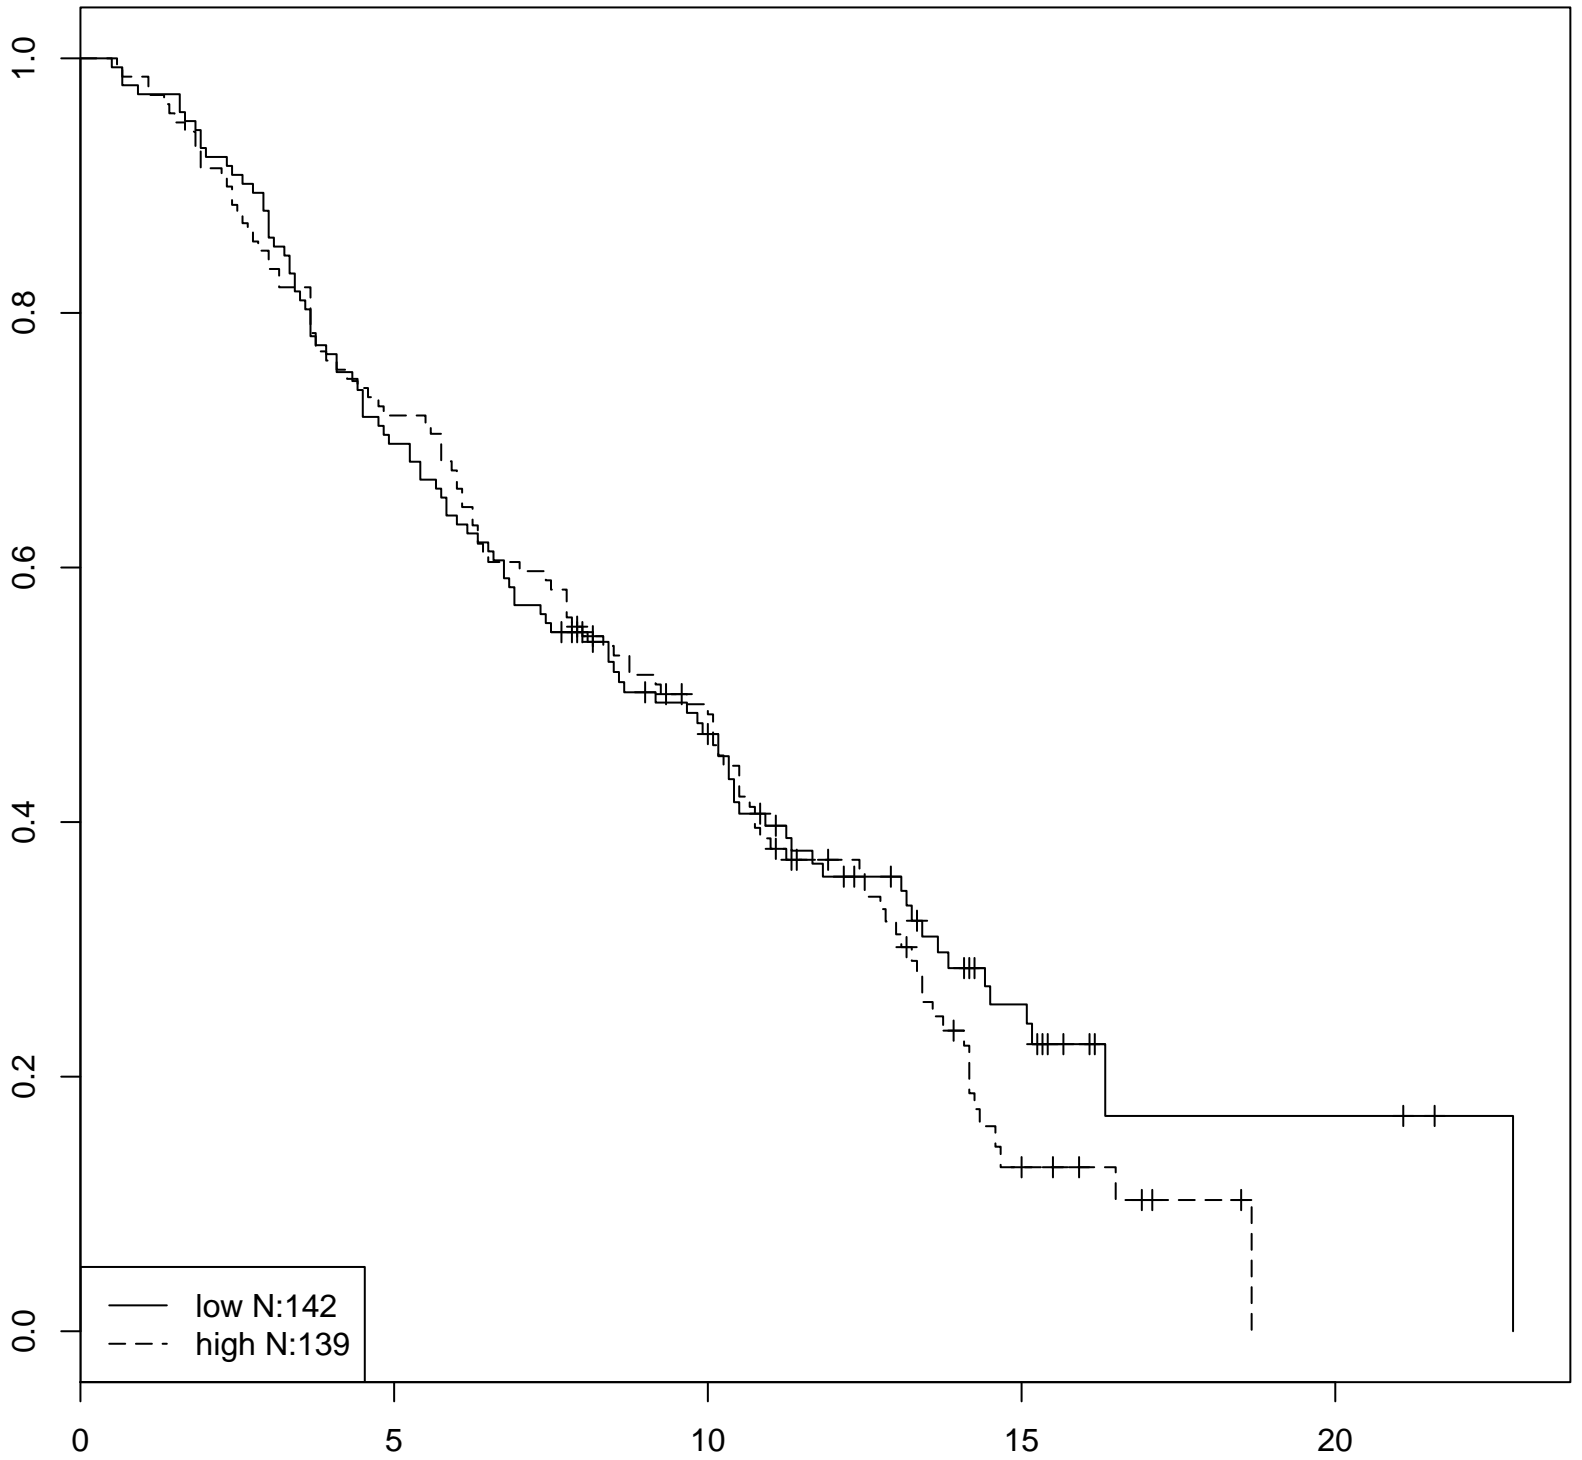

years

log-rank test p-value = 0.375

# Survival by GJA1 expression

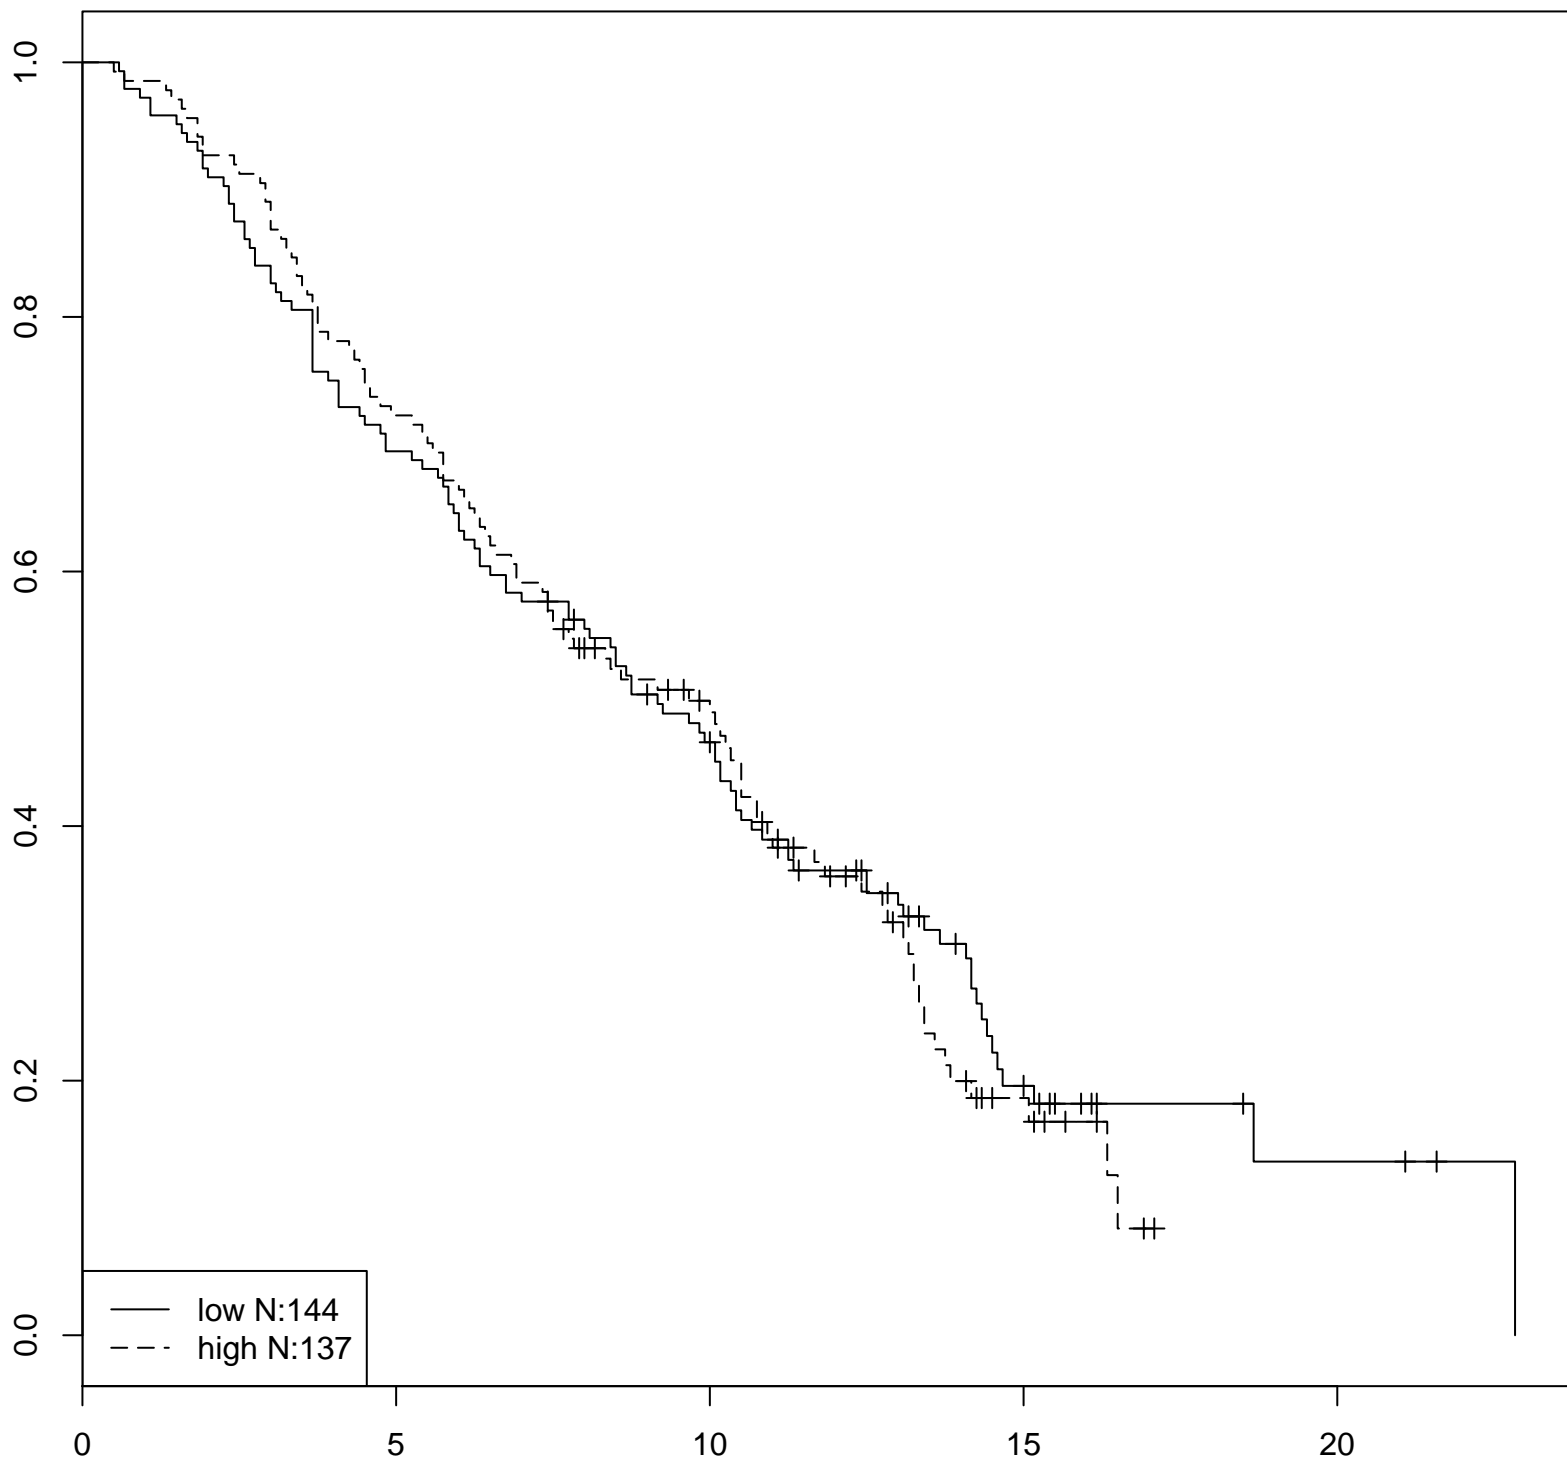

years  
log-rank test p-value = 0.705

# Survival by GLI1 expression

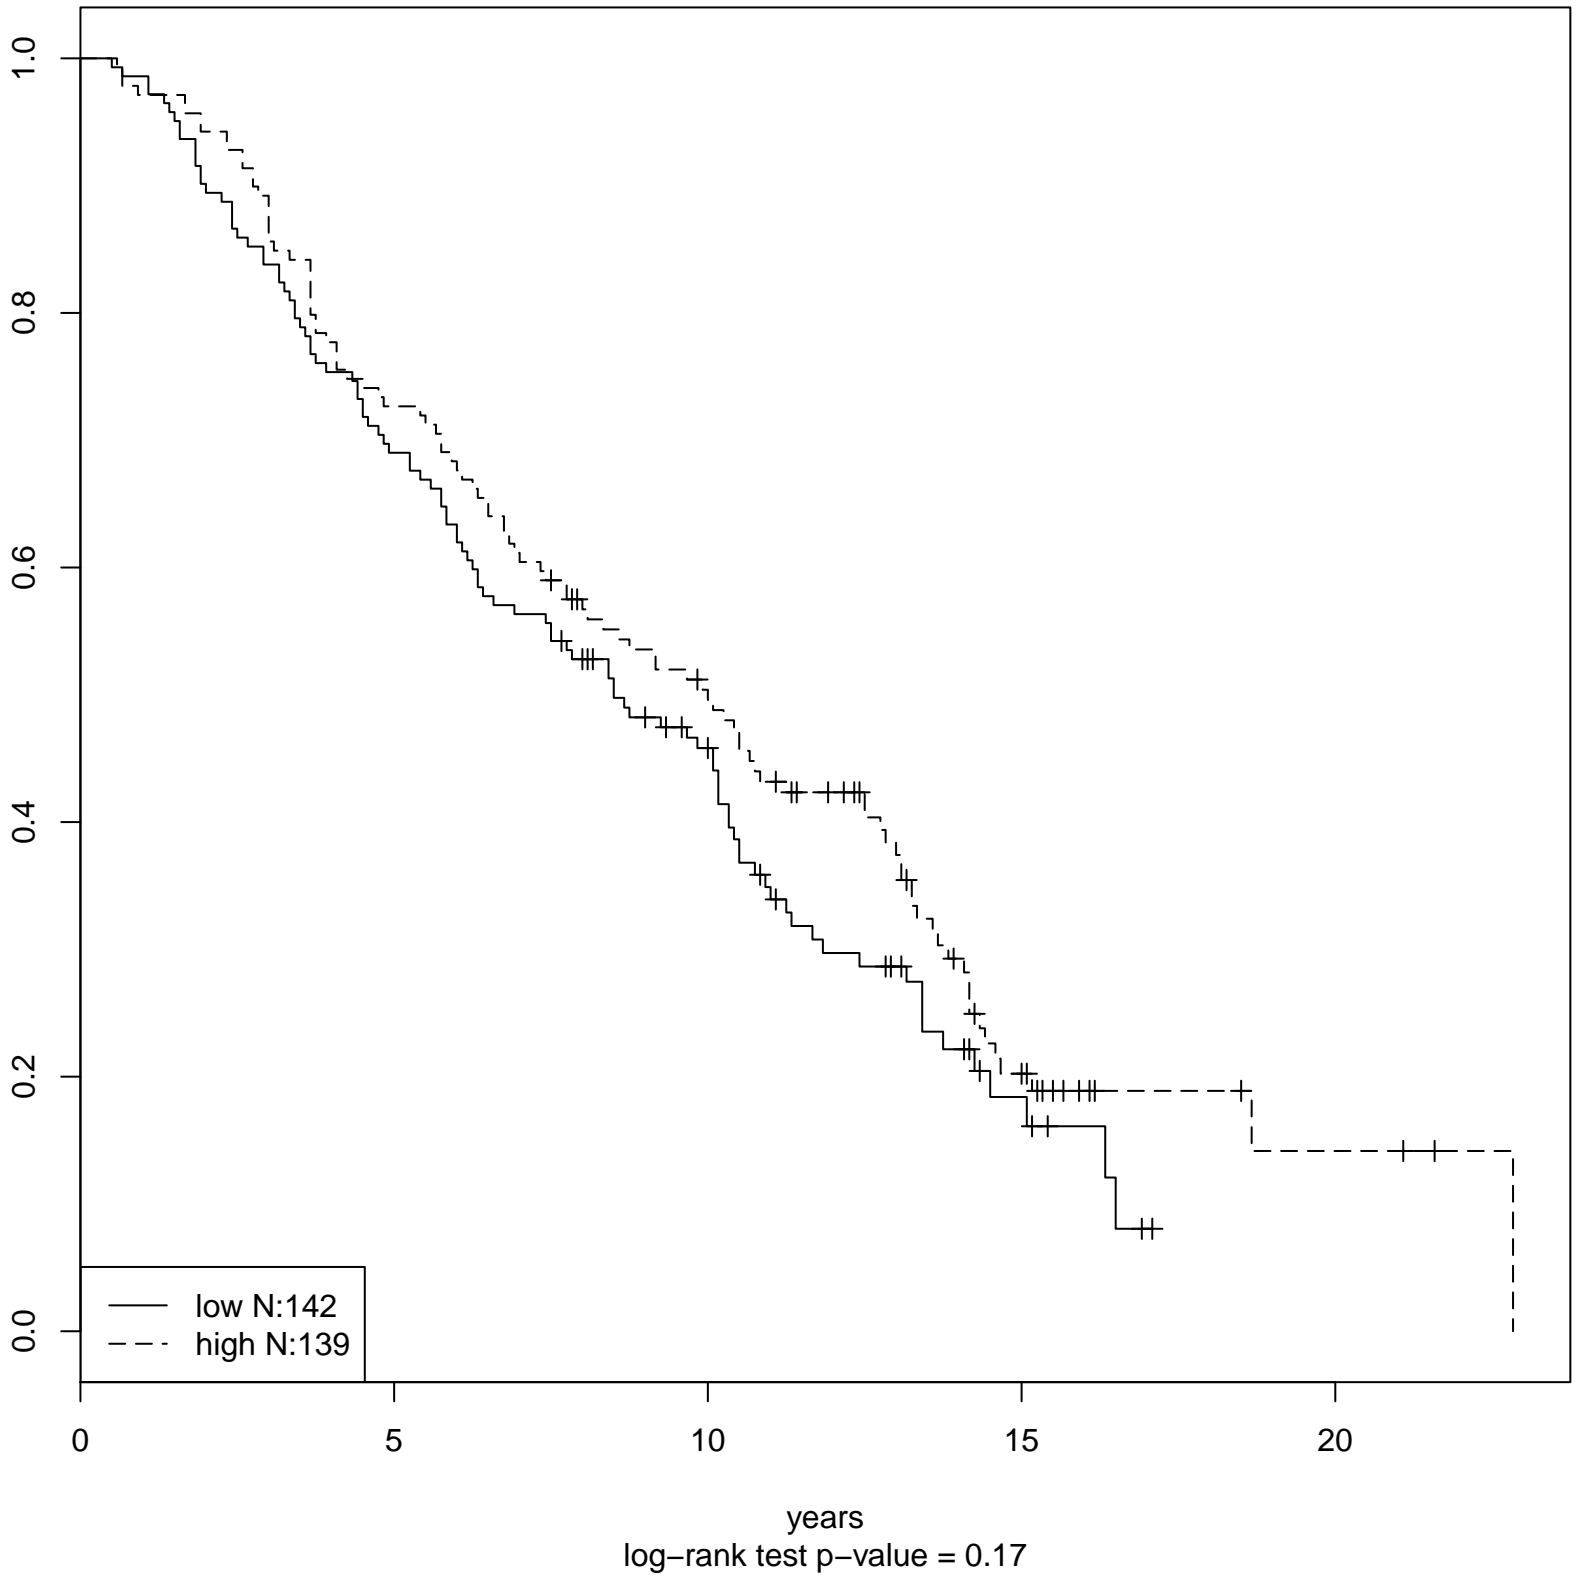



# Survival by GLI2 expression

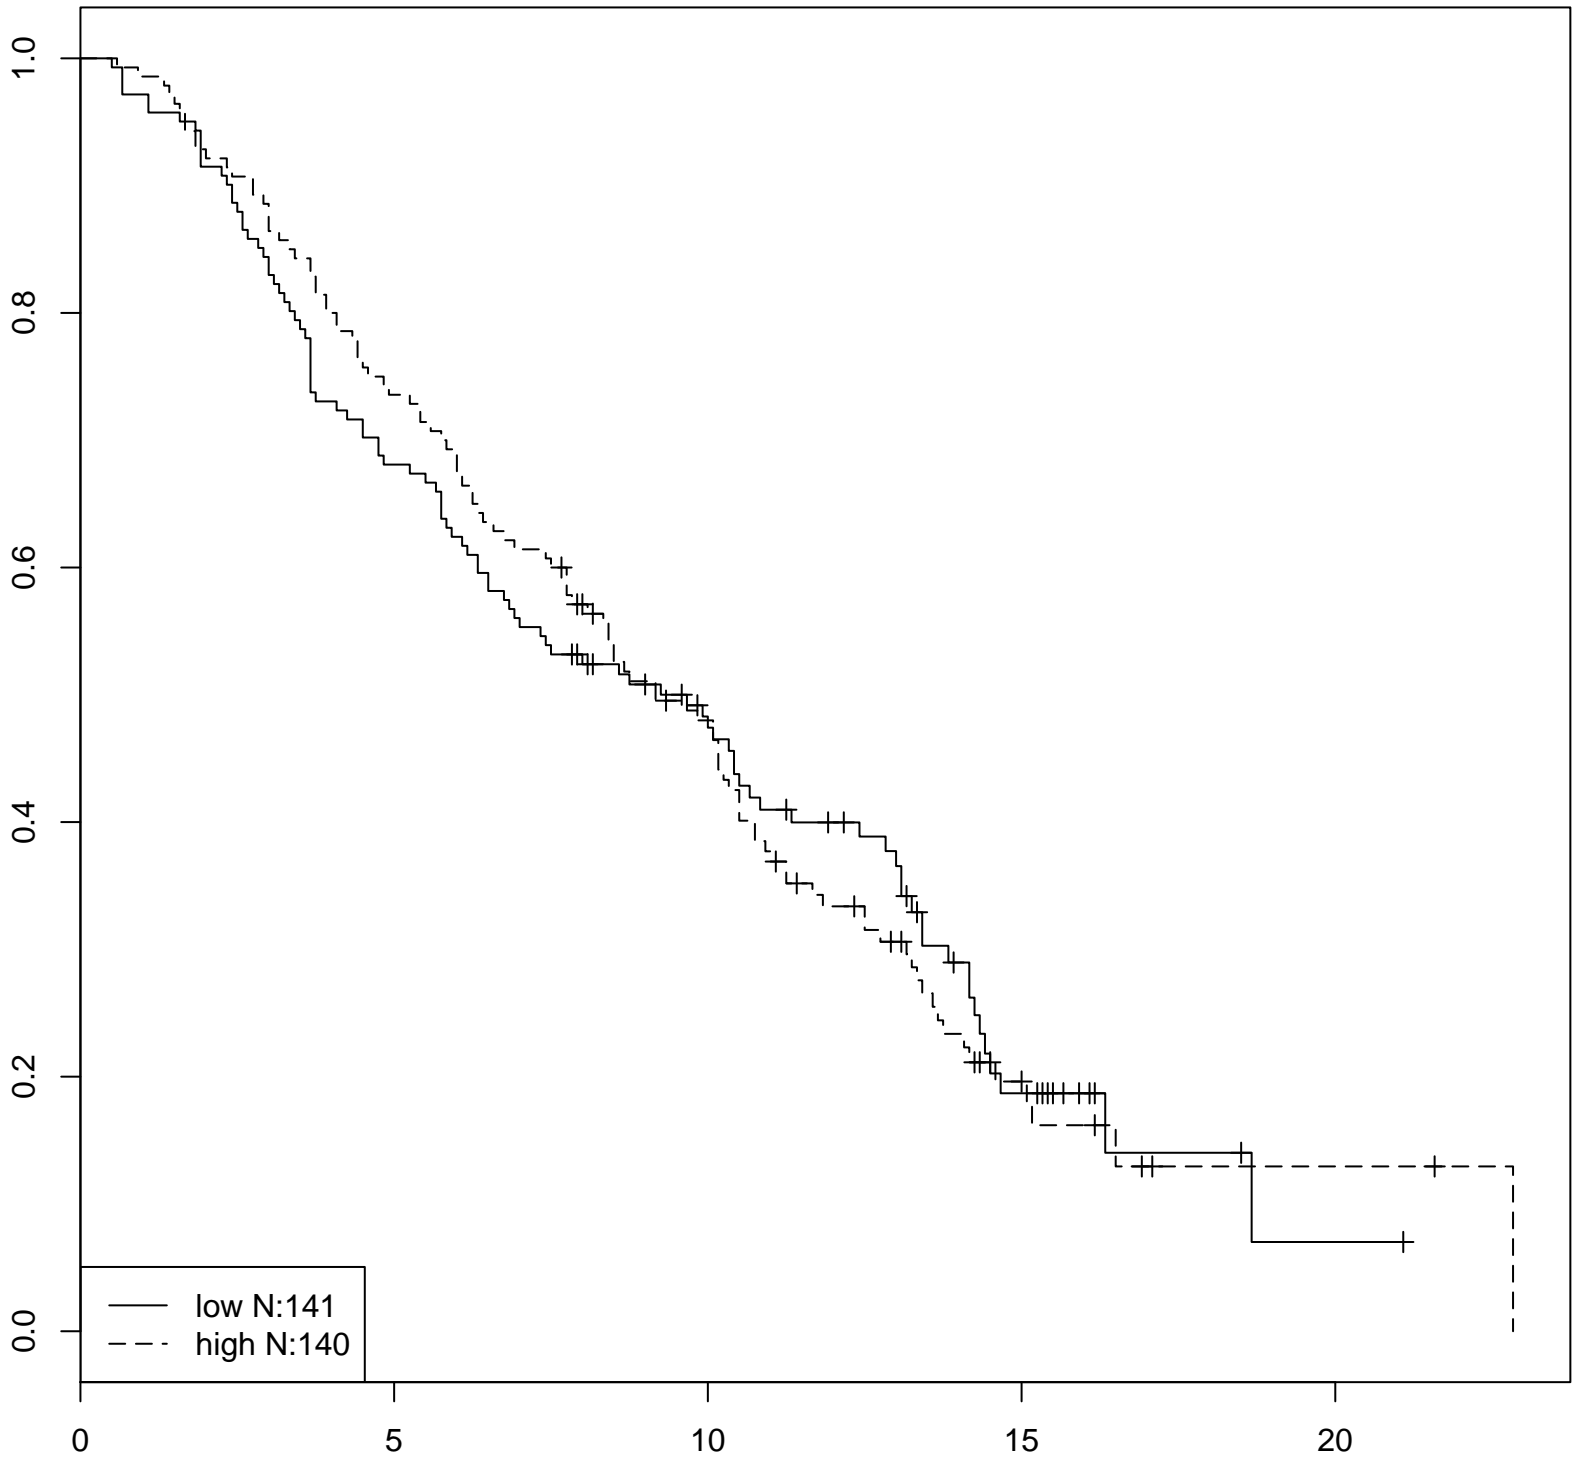

years  
log-rank test p-value = 0.938

# Survival by GLO1 expression

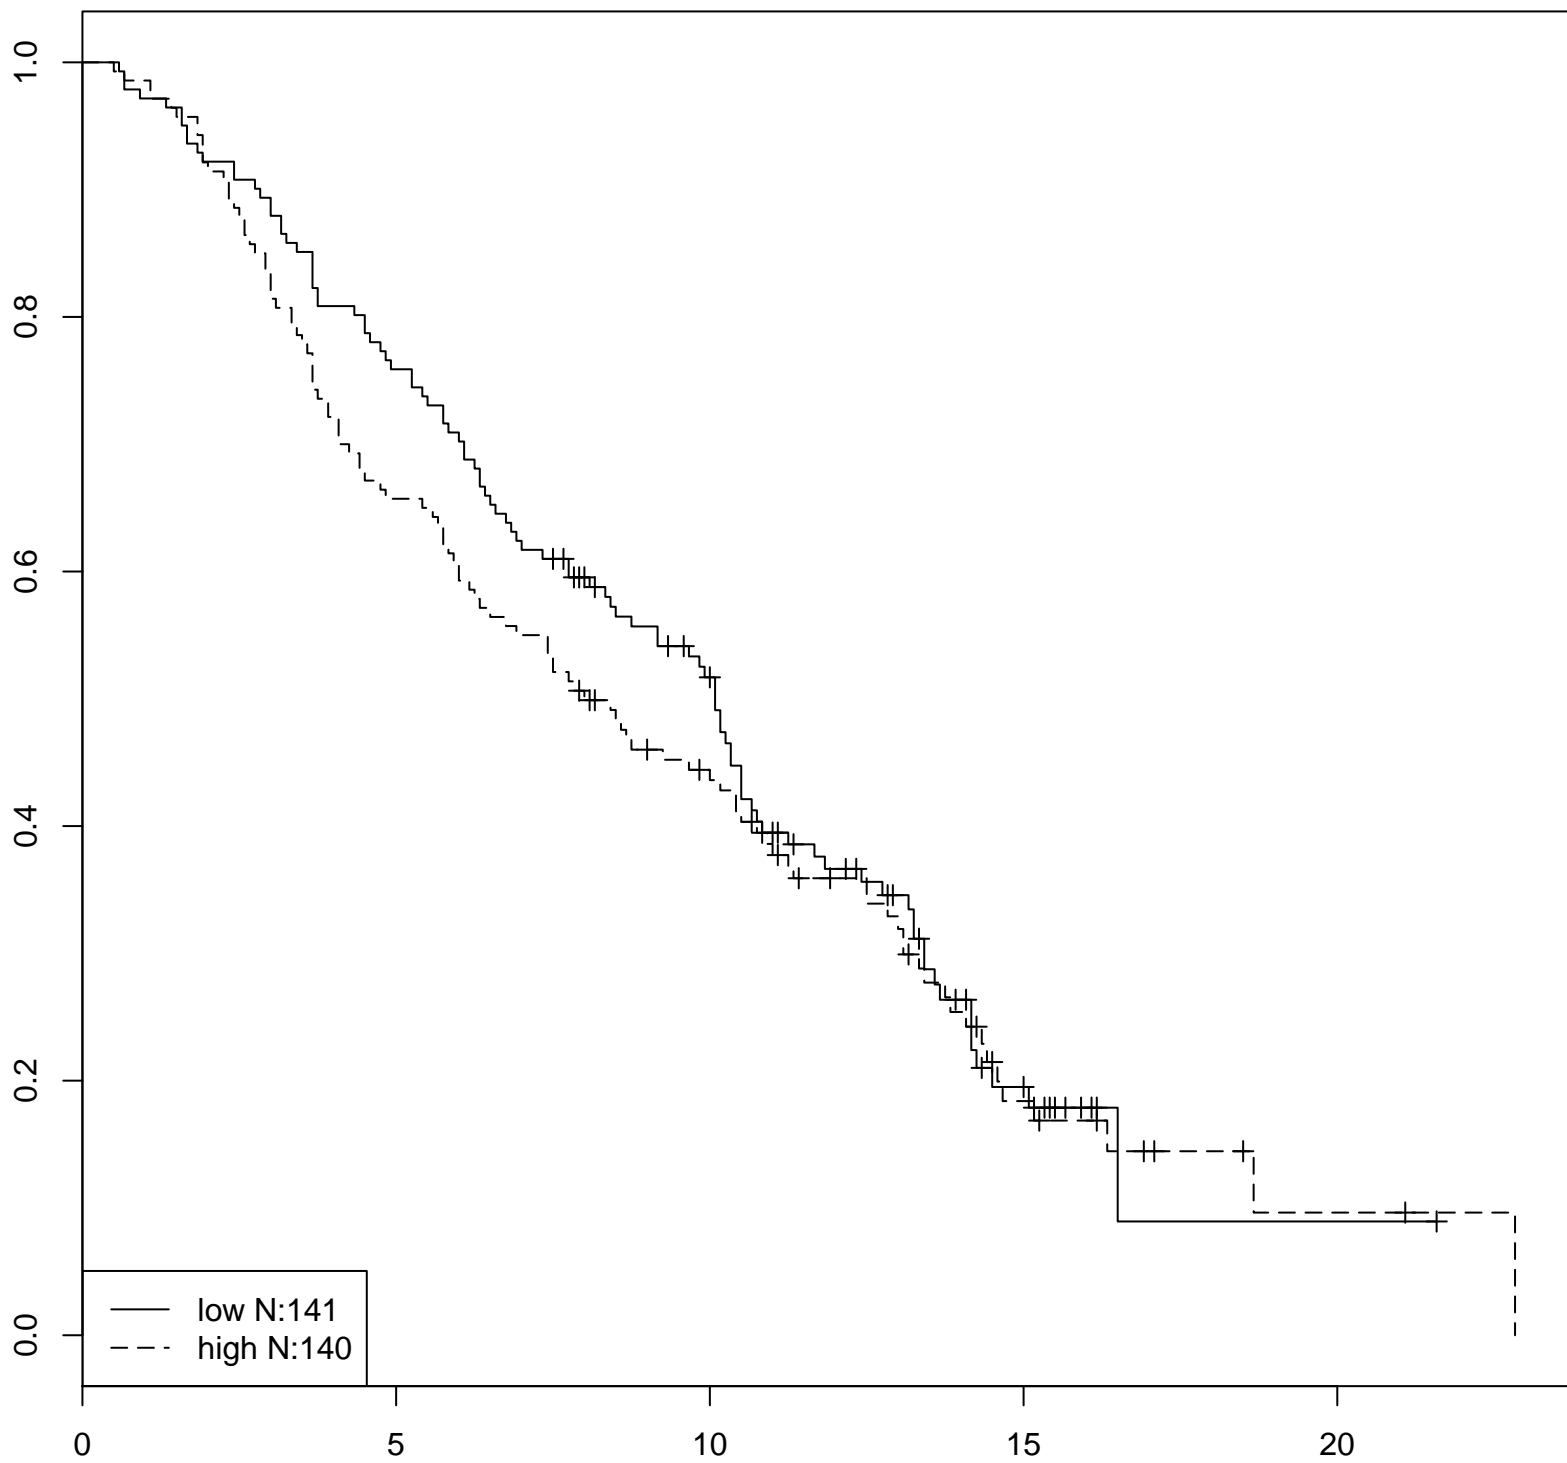

# Survival by GRP expression

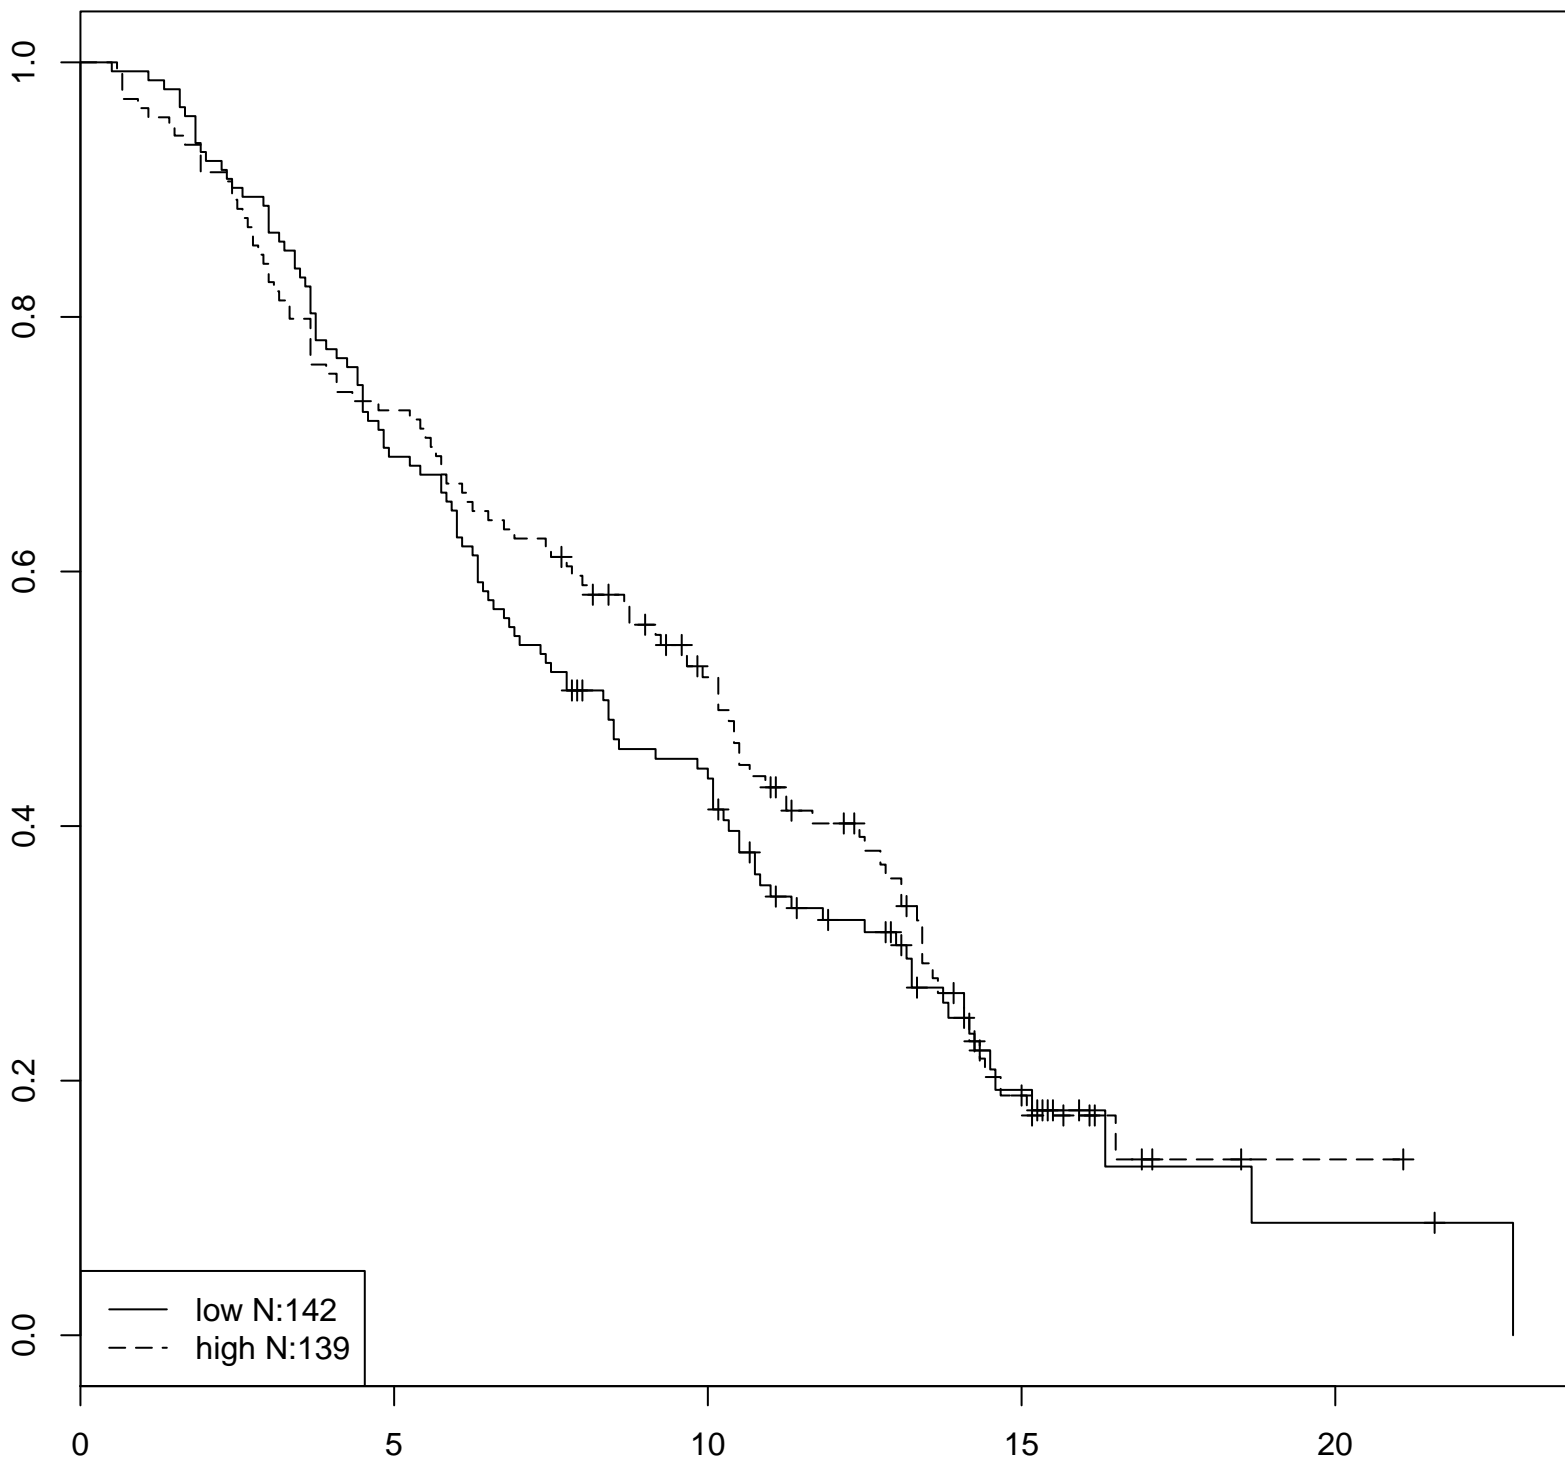

years

log-rank test p-value = 0.452

# Survival by GSTP1 expression

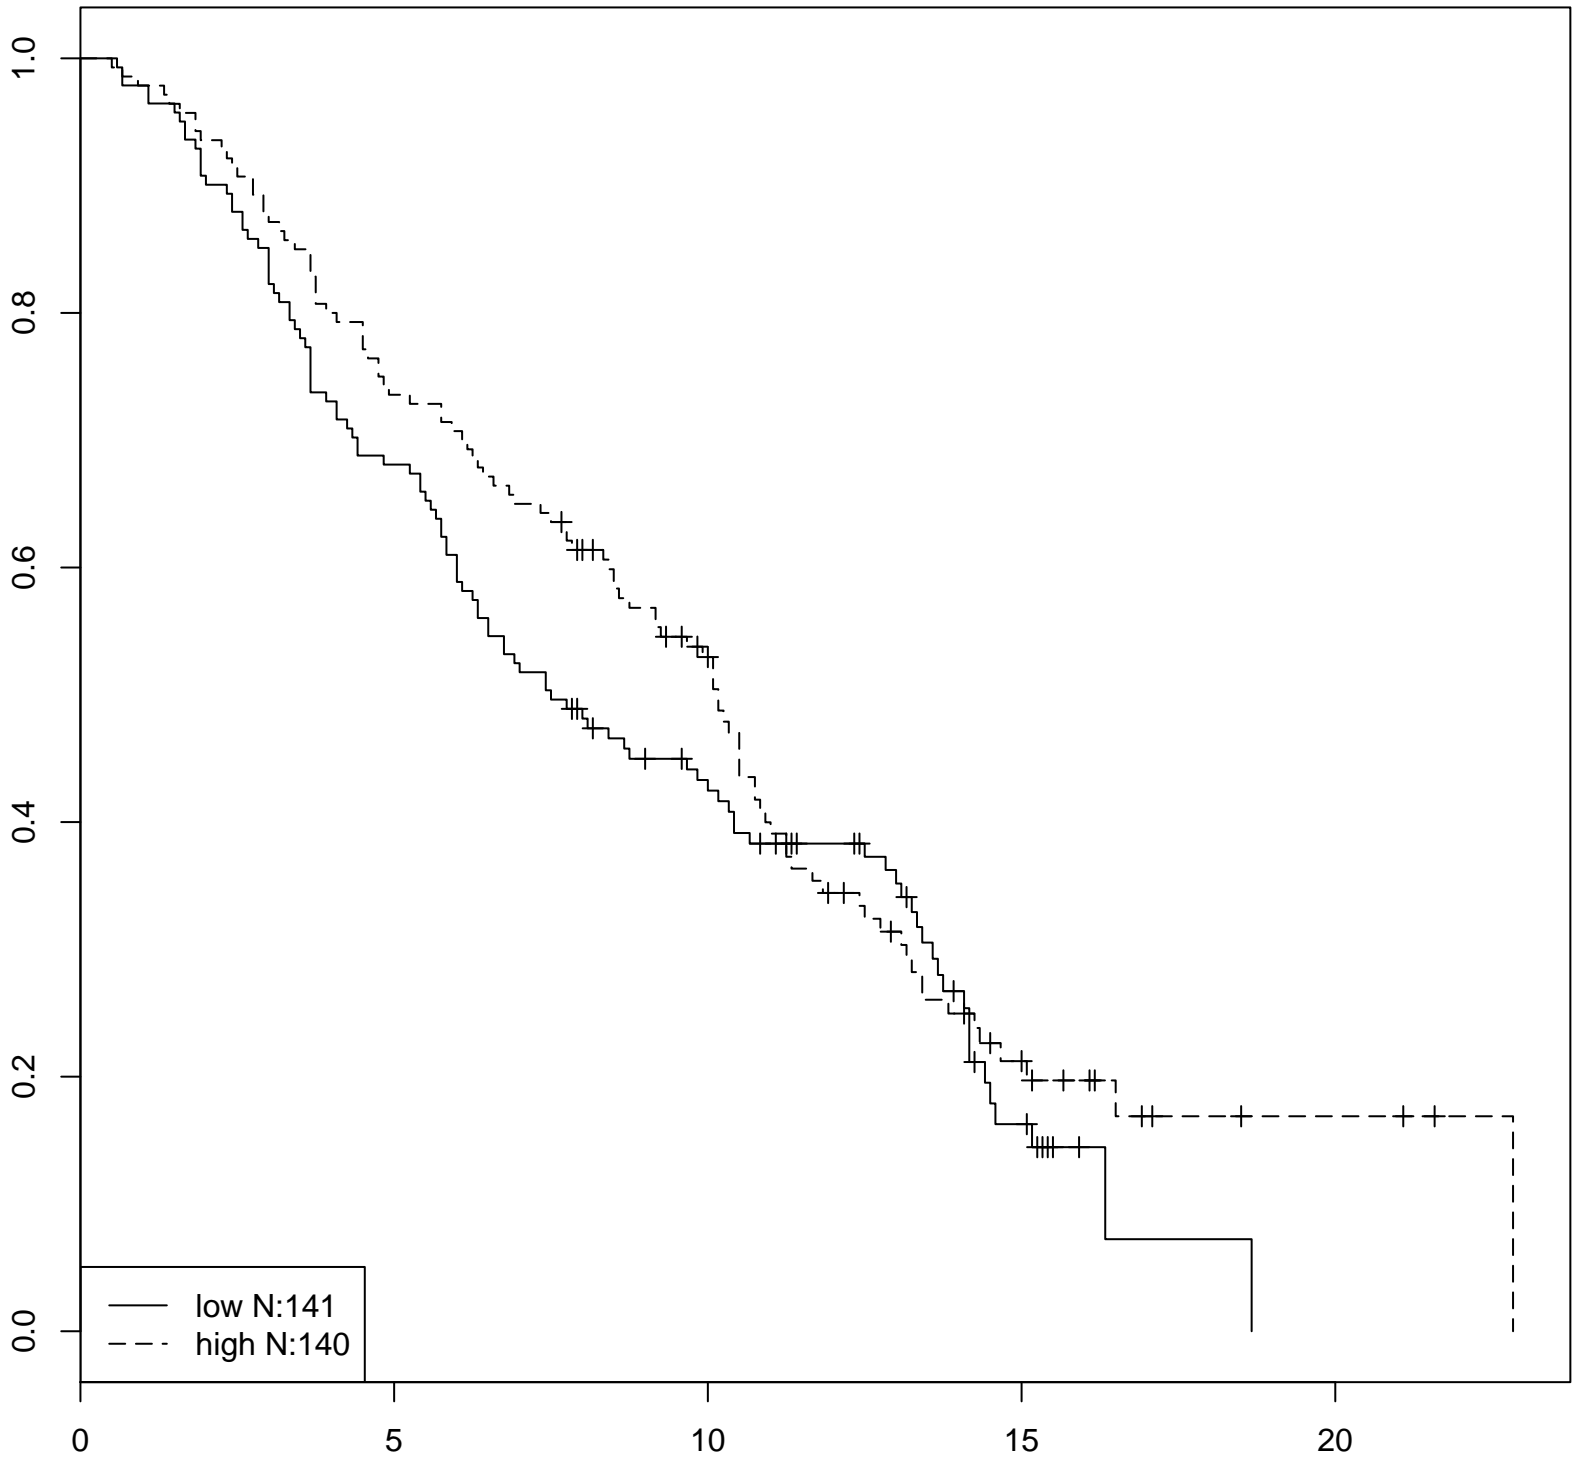

years  
log-rank test p-value = 0.21

# Survival by GUCY1A3 expression

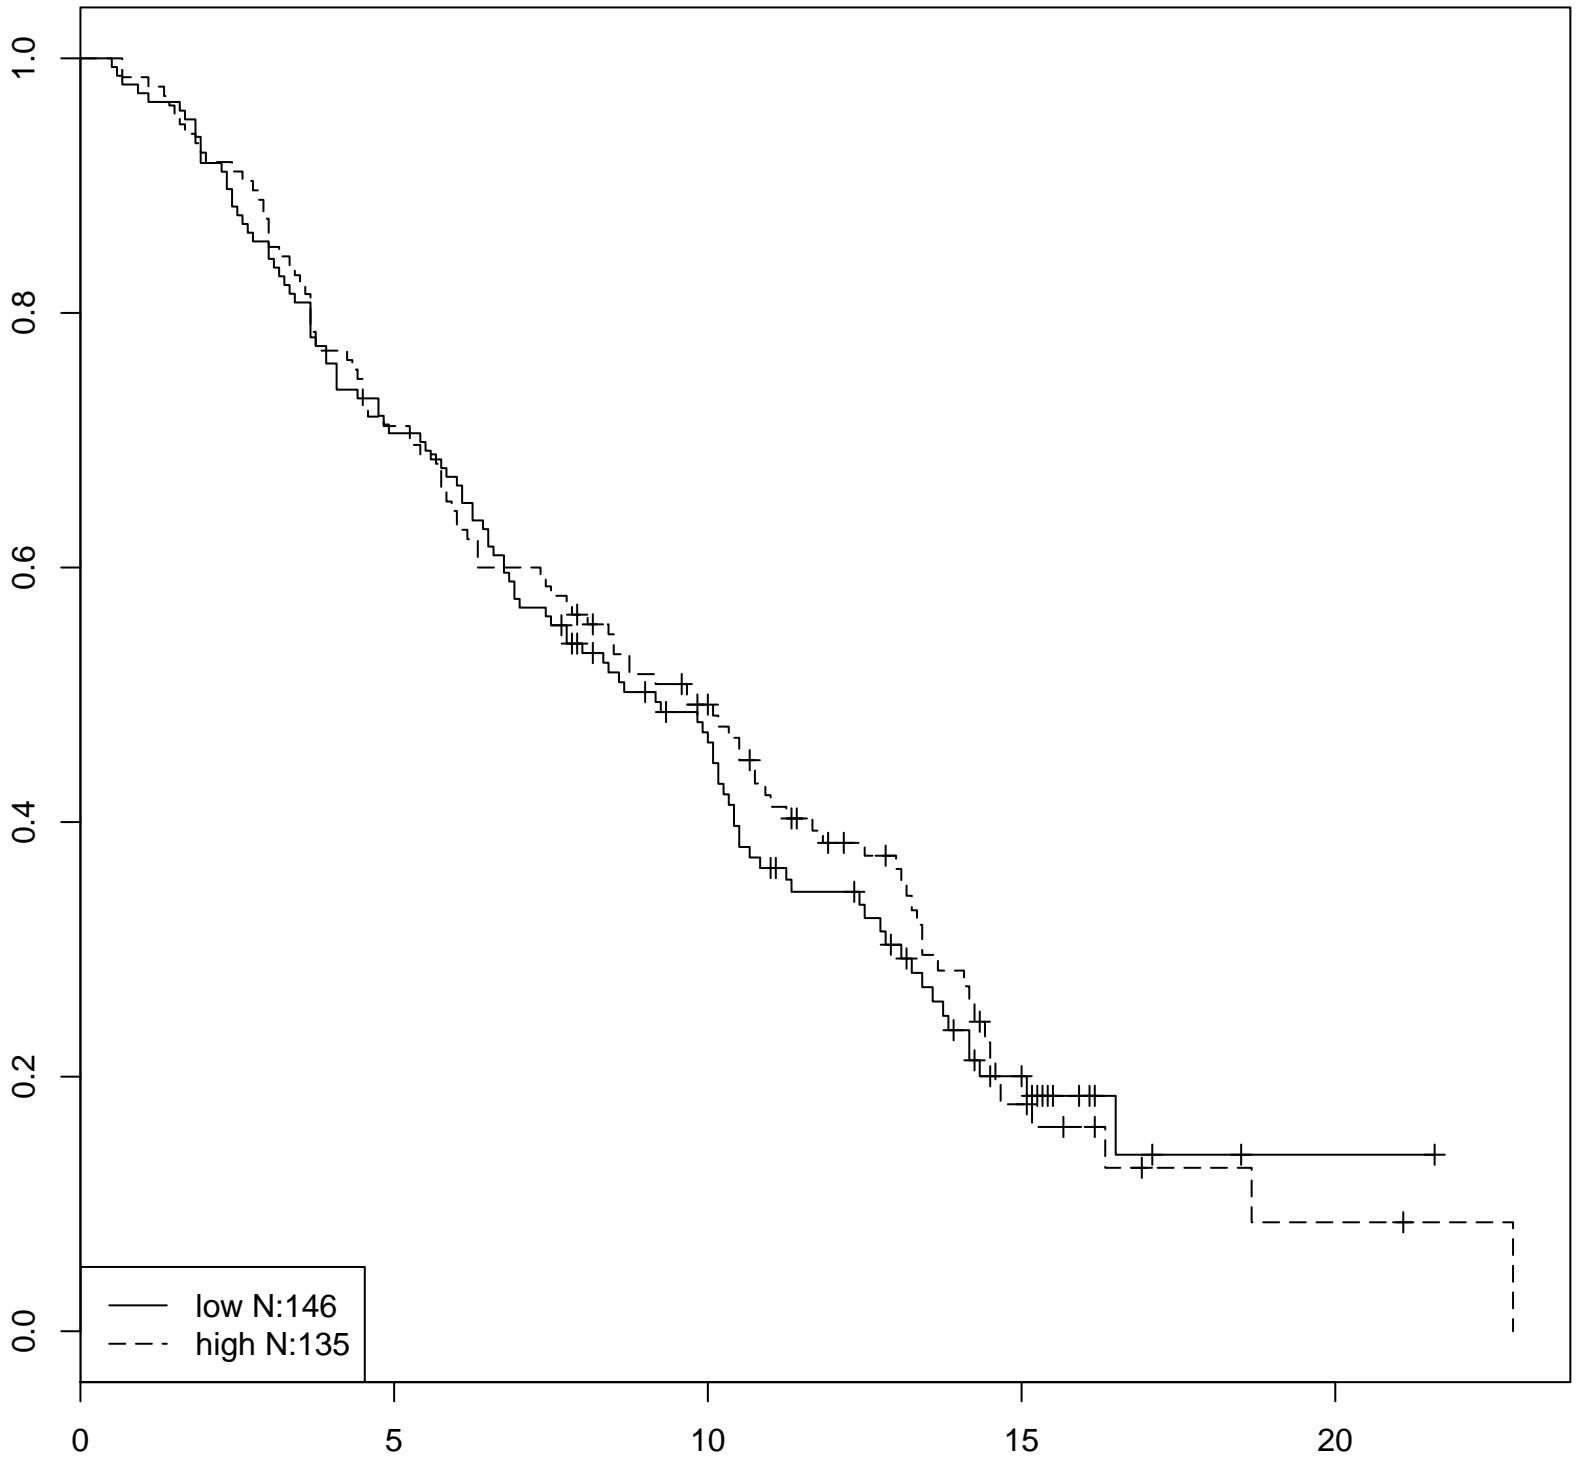

# Survival by HGF expression

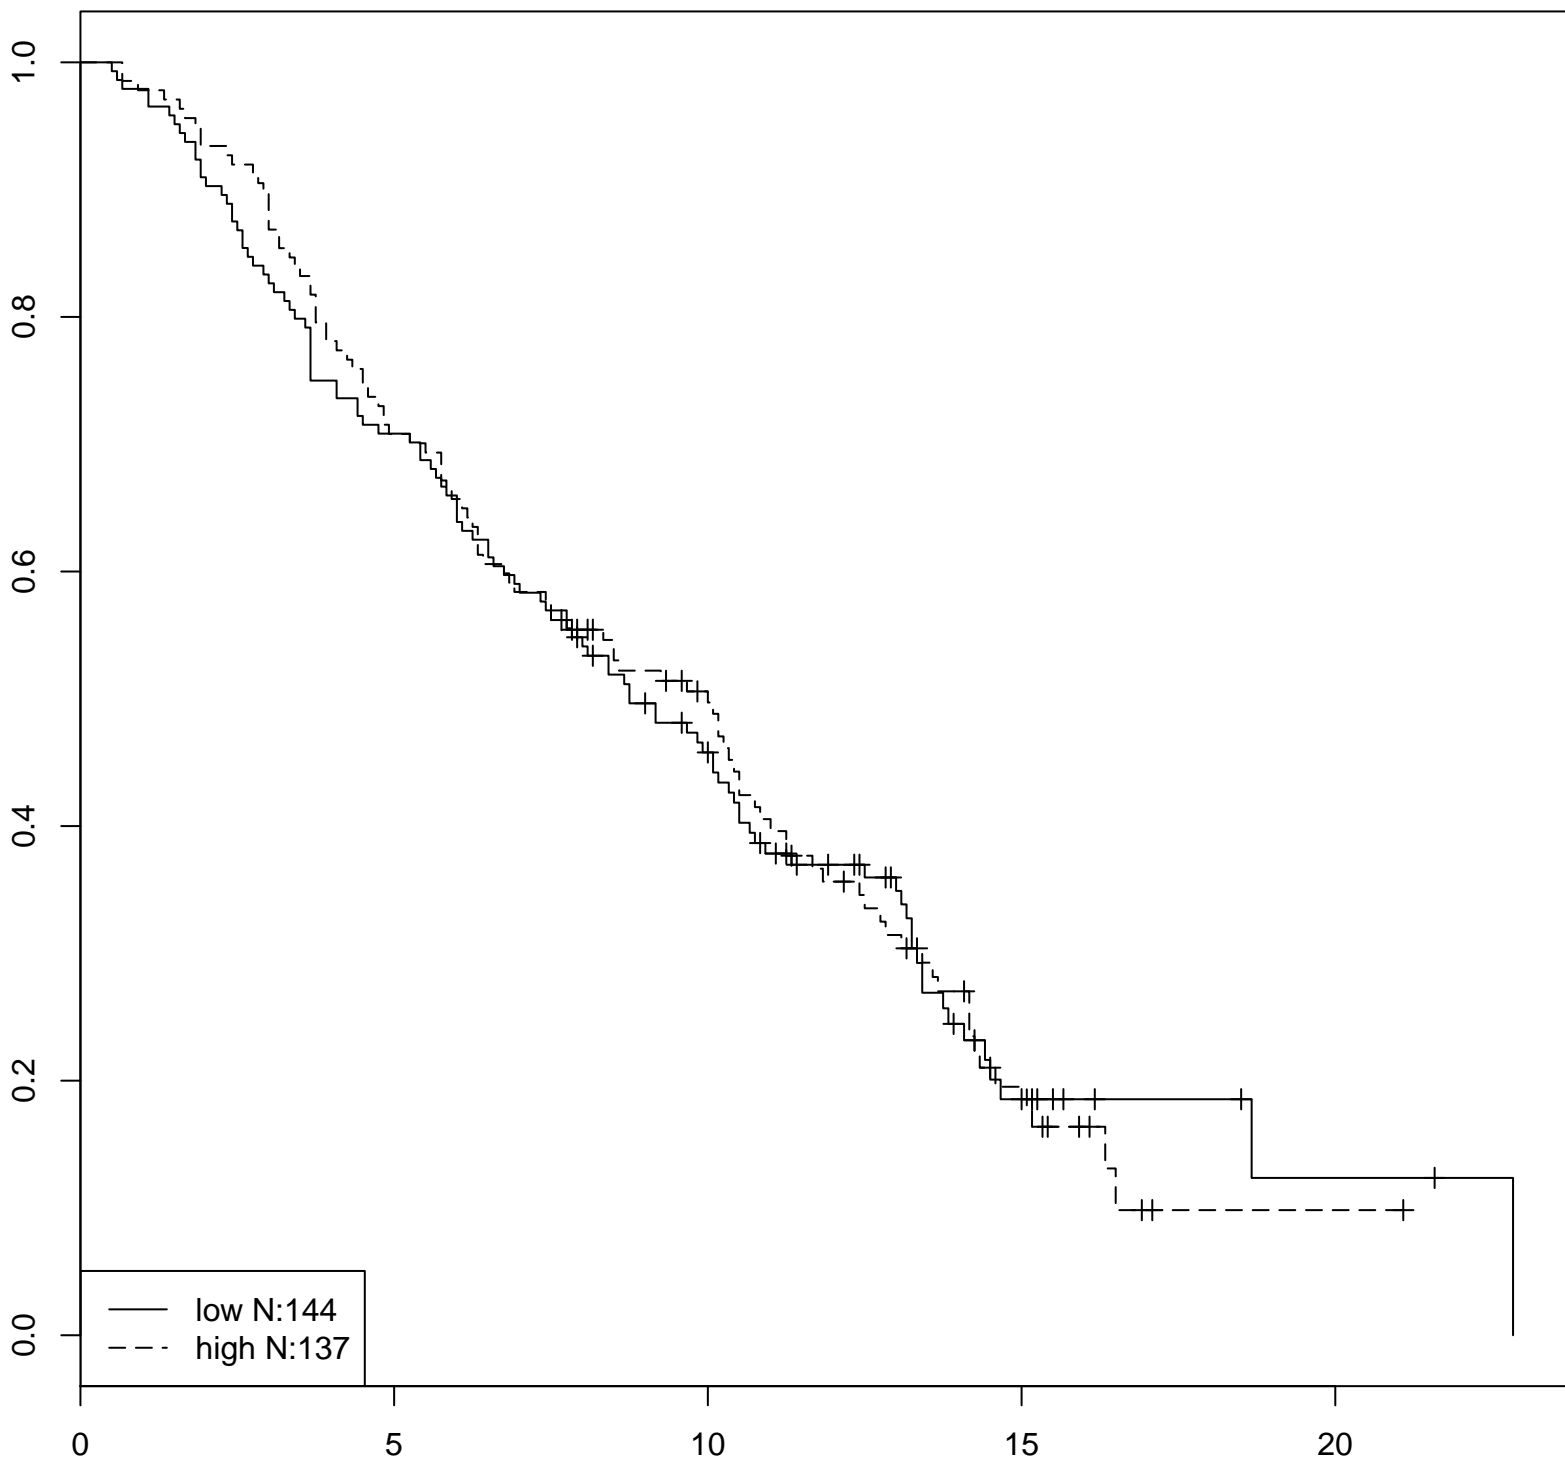

years

log-rank test p-value = 0.955

# Survival by HIF1A expression

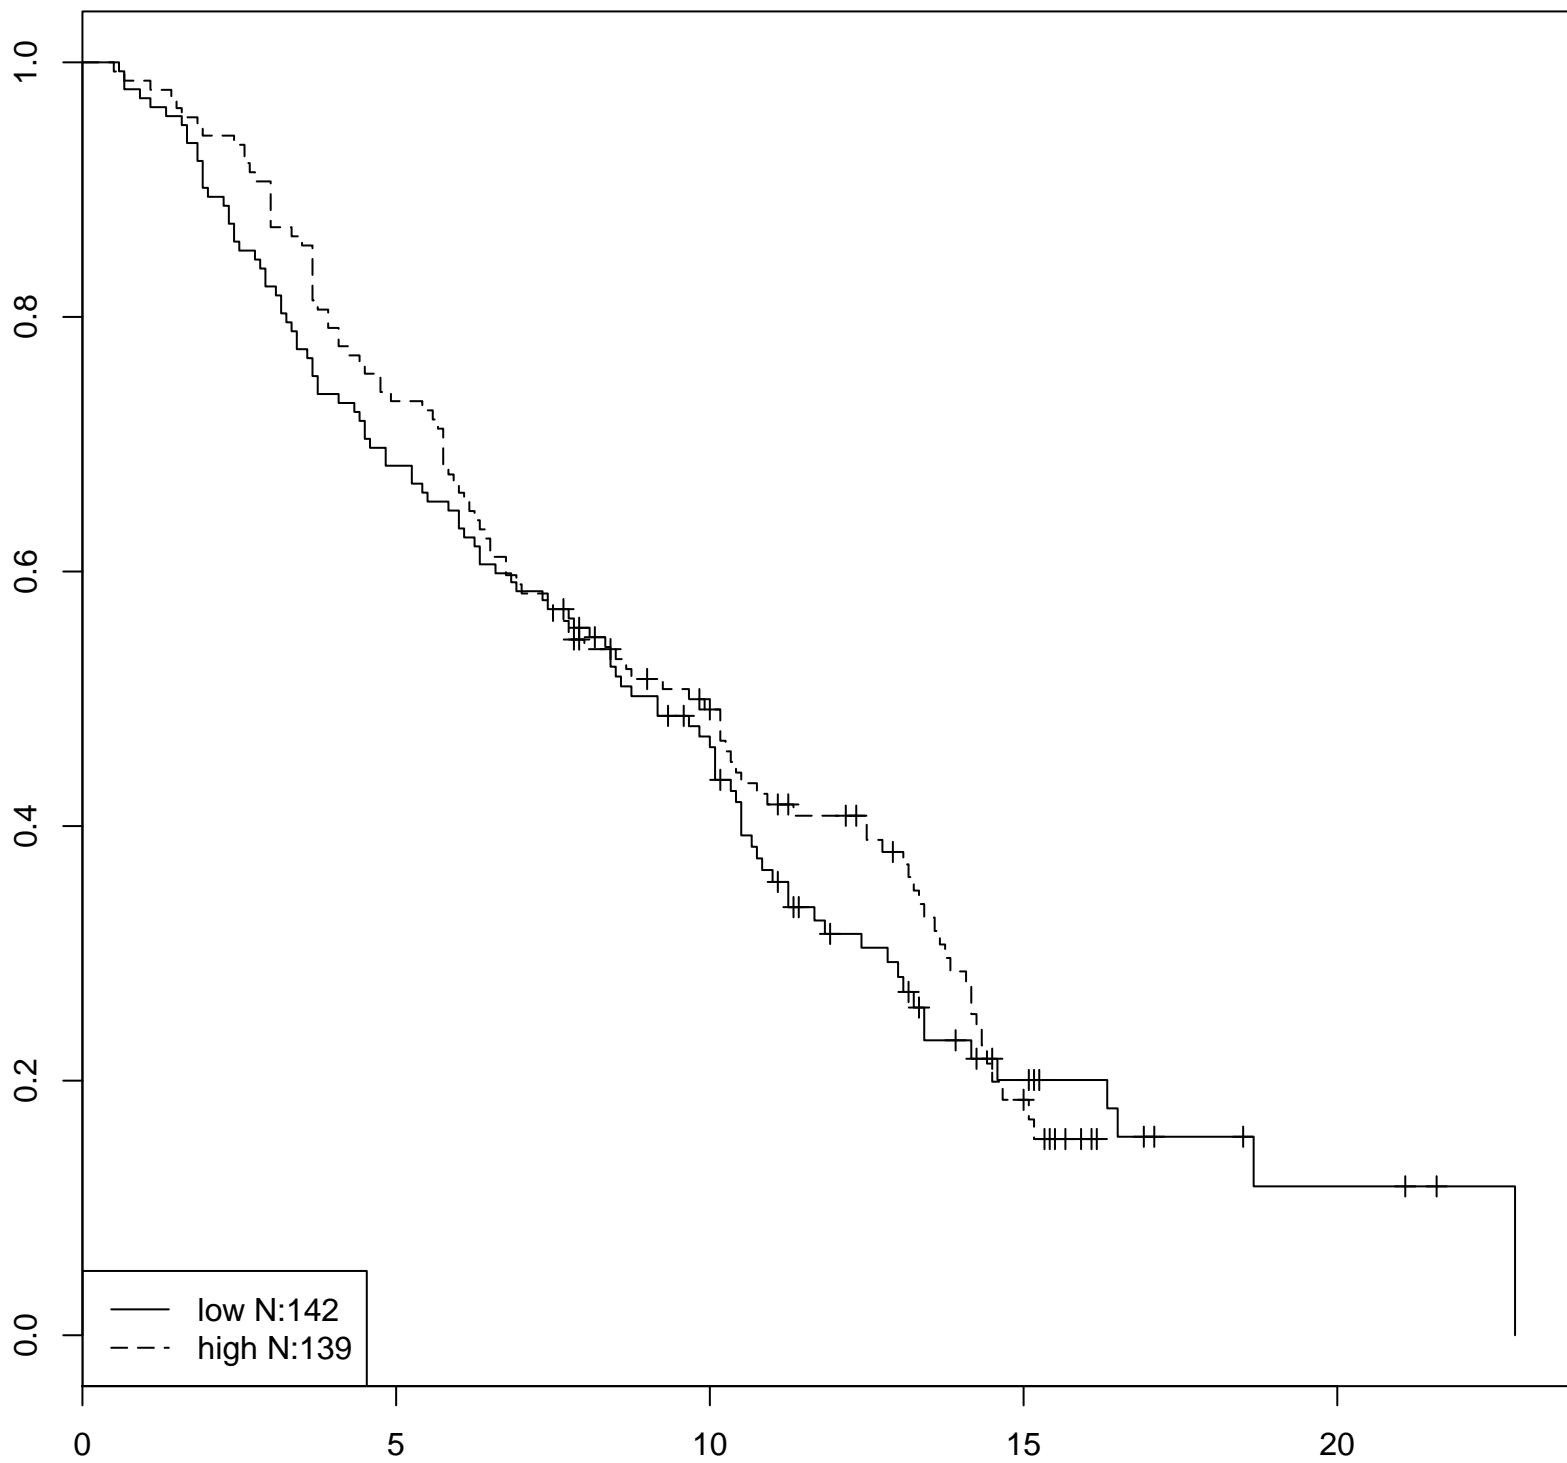

years

log-rank test p-value = 0.552

# Survival by HIP1 expression

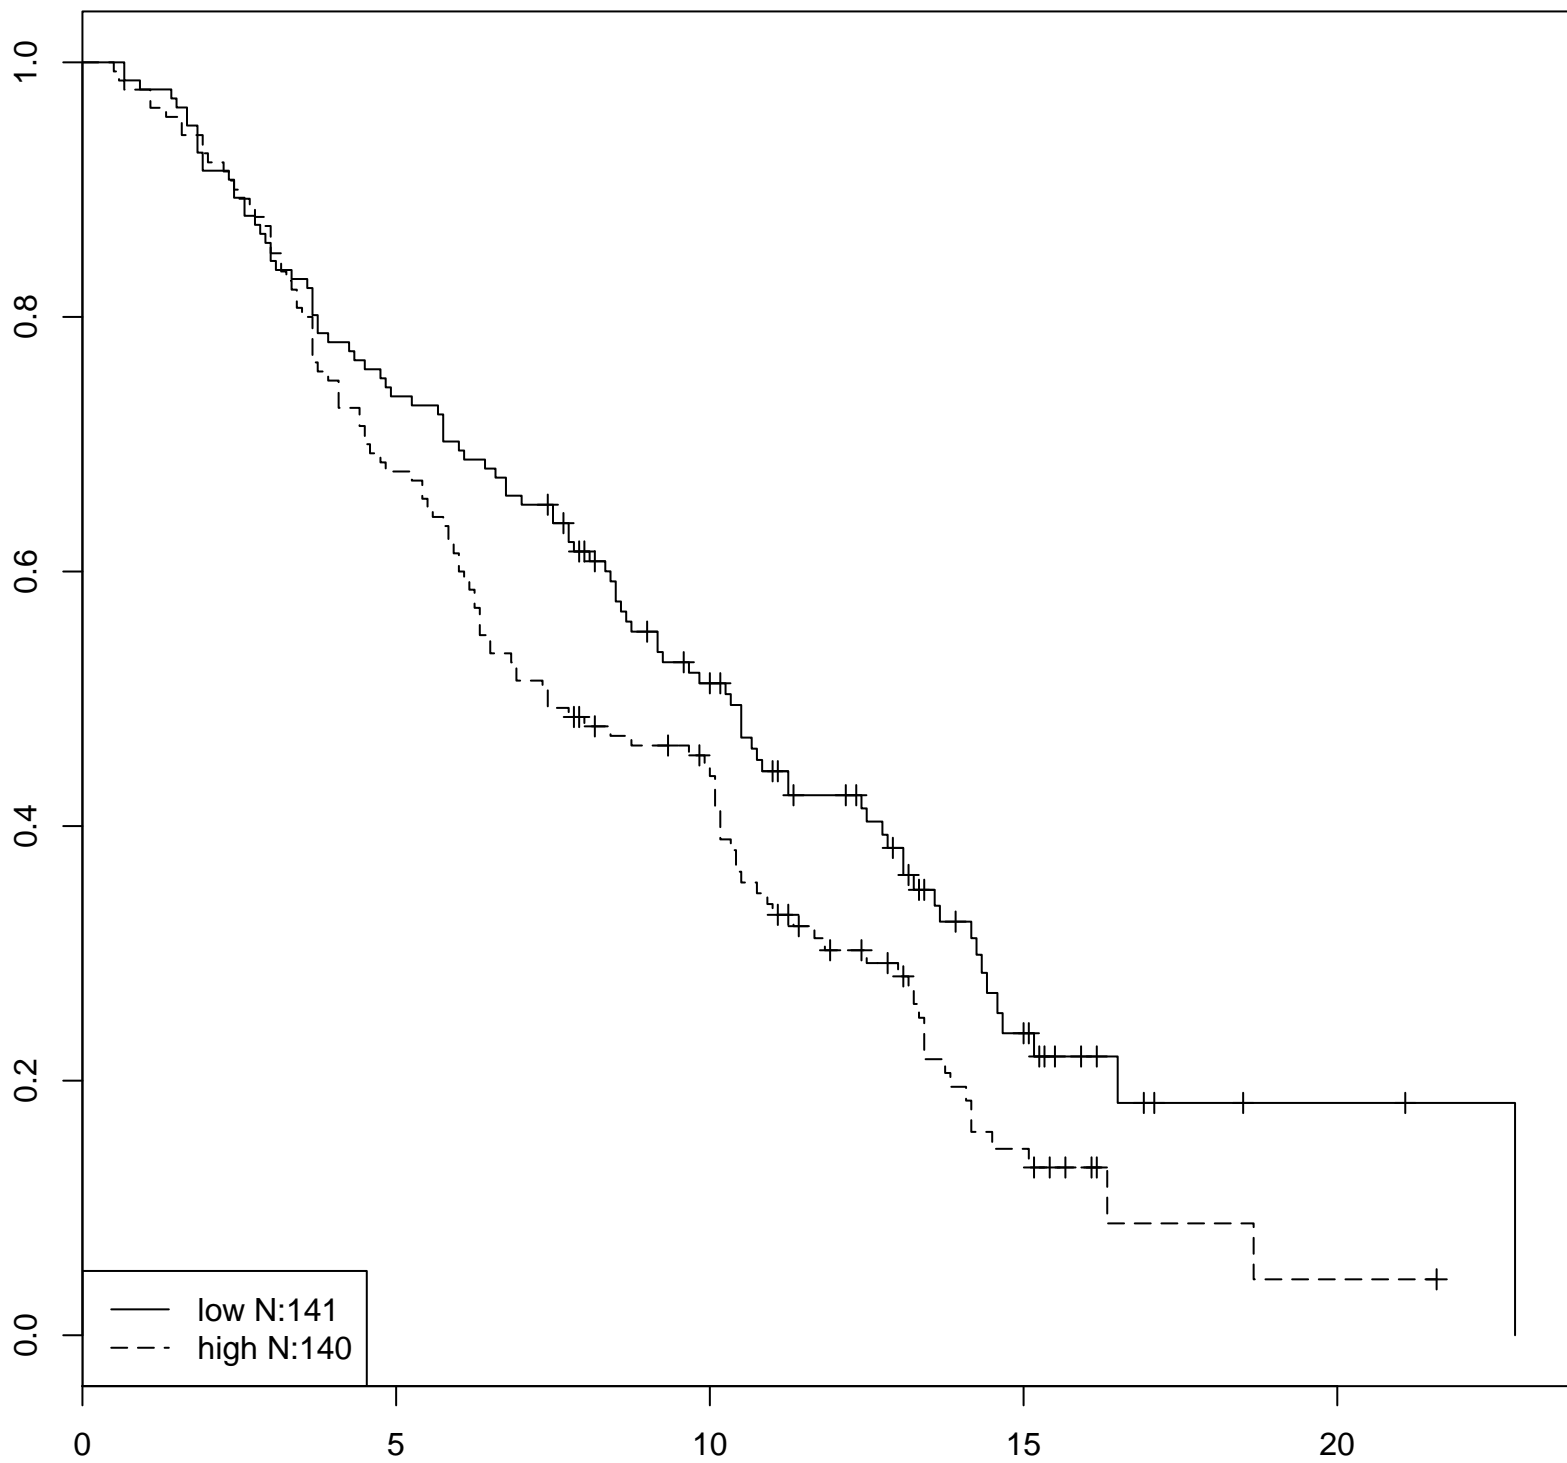

years  
log-rank test p-value = 0.023



# Survival by HK2 expression

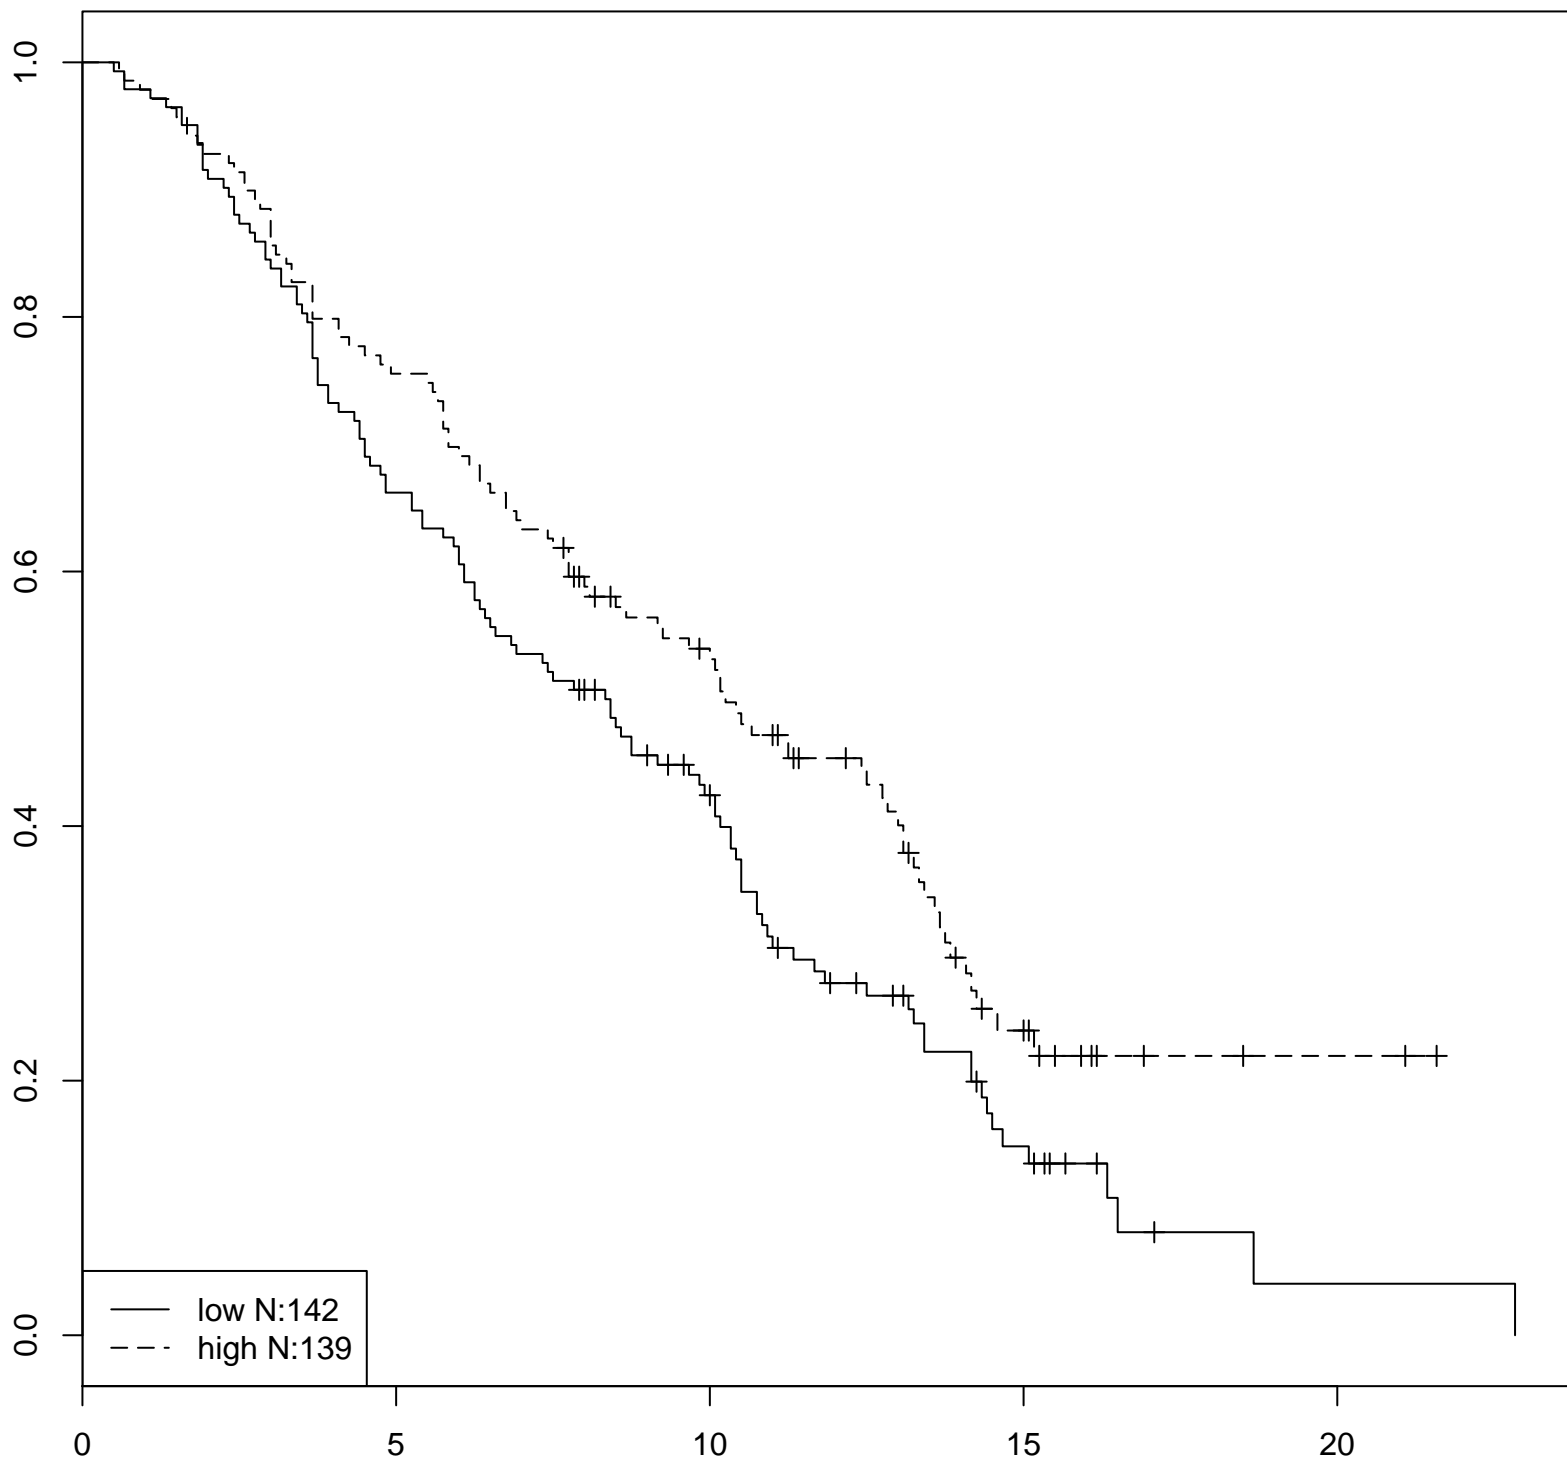

years

log-rank test p-value = 0.019

# Survival by HMHA1 expression

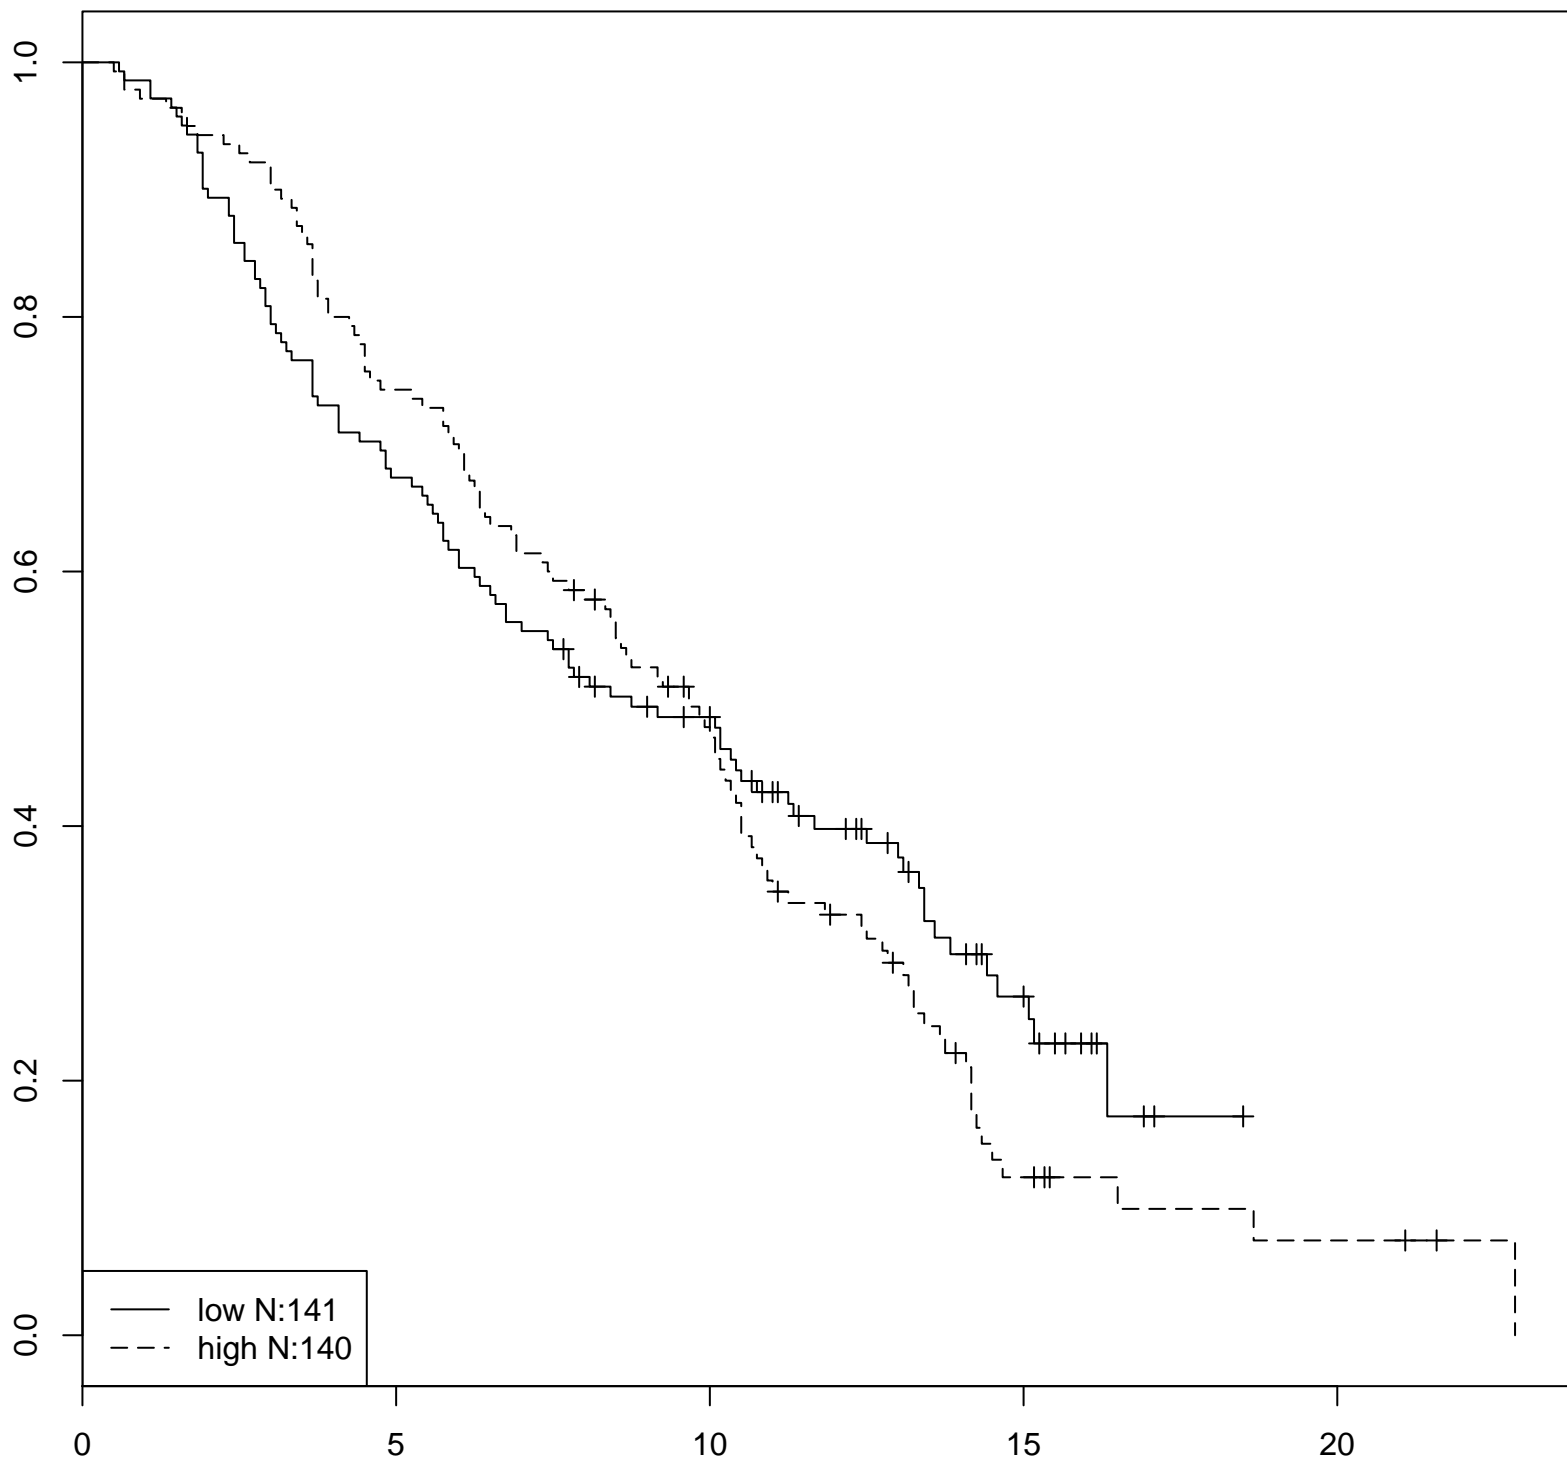

years  
log-rank test p-value = 0.41

# Survival by HMOX1 expression

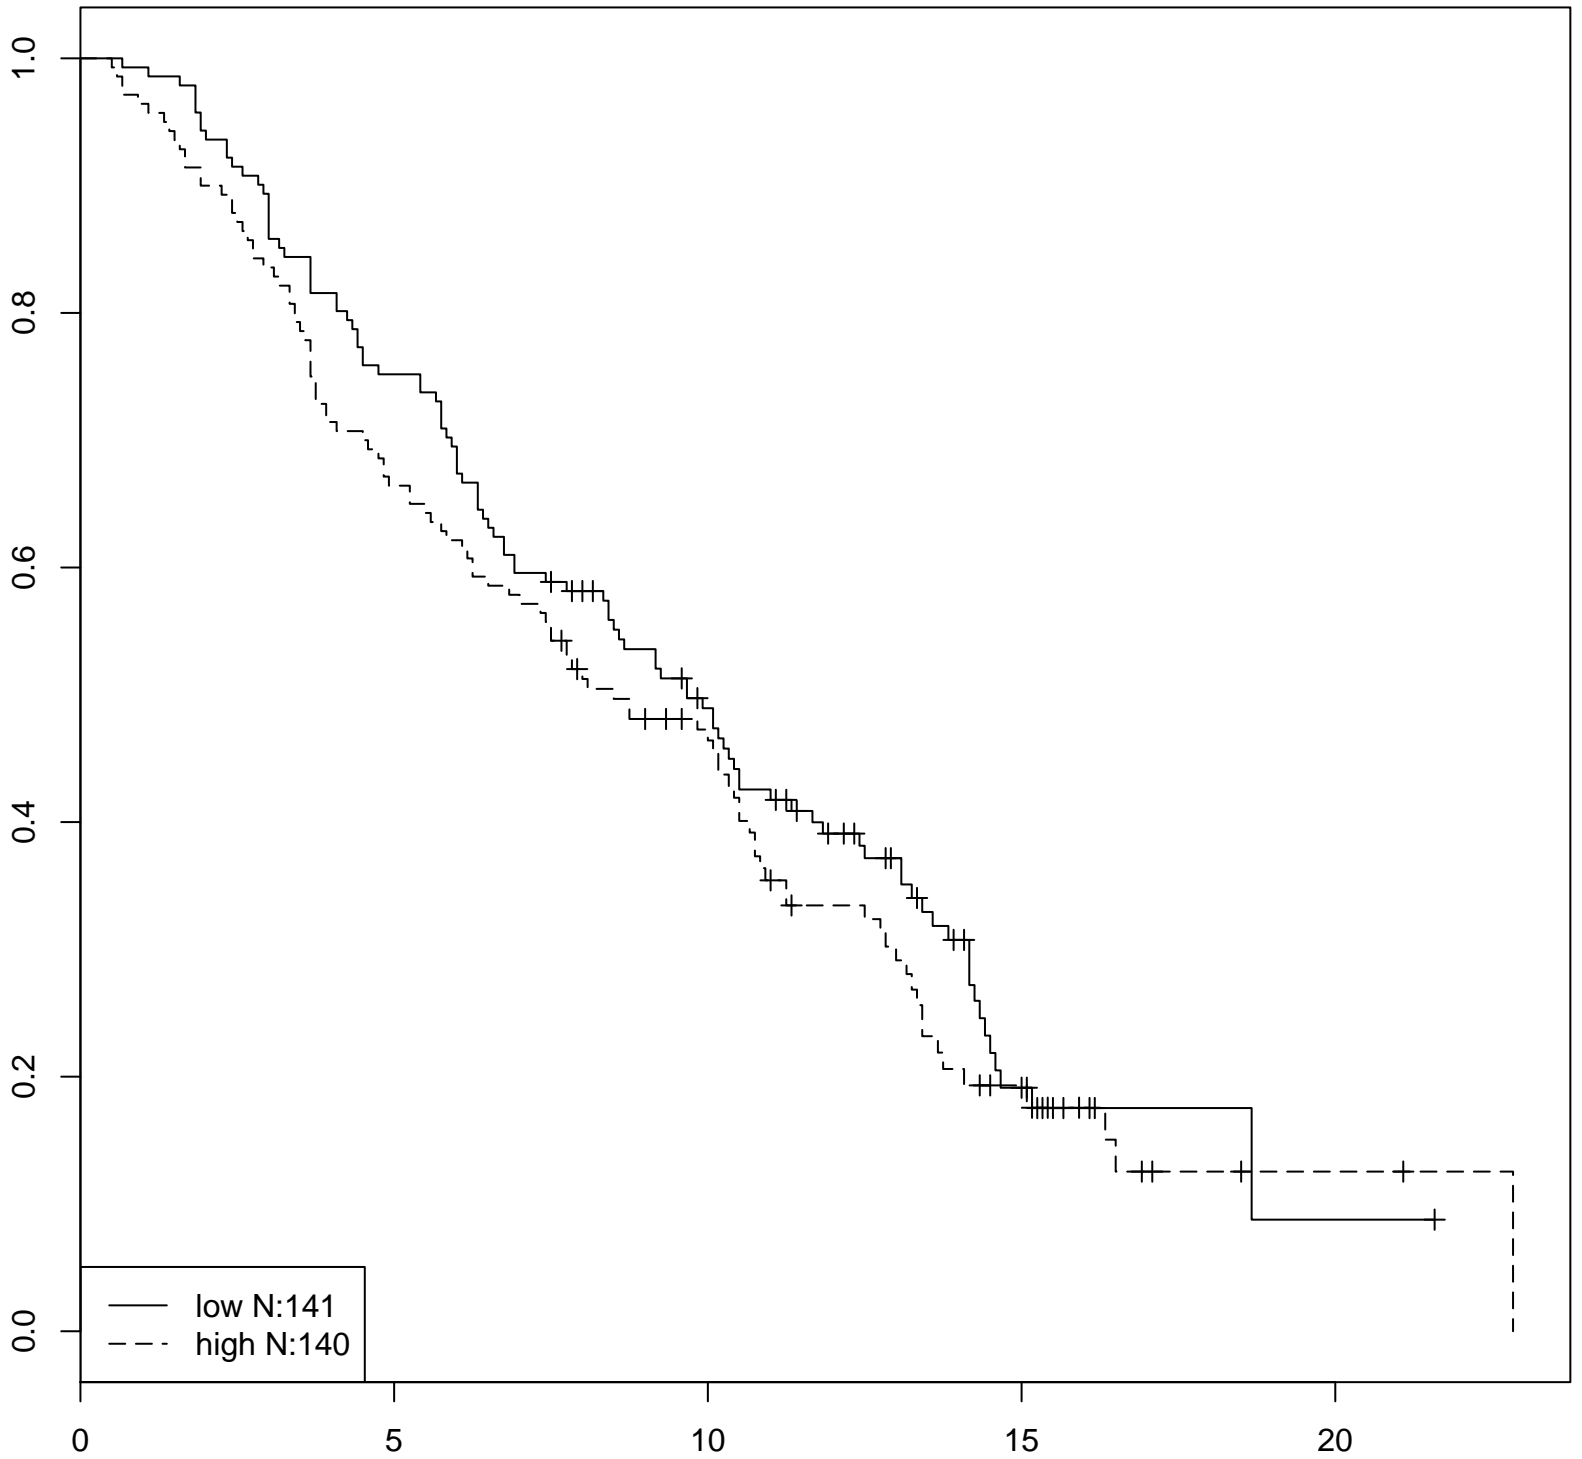

years

log-rank test p-value = 0.287

# Survival by HOXB13 expression

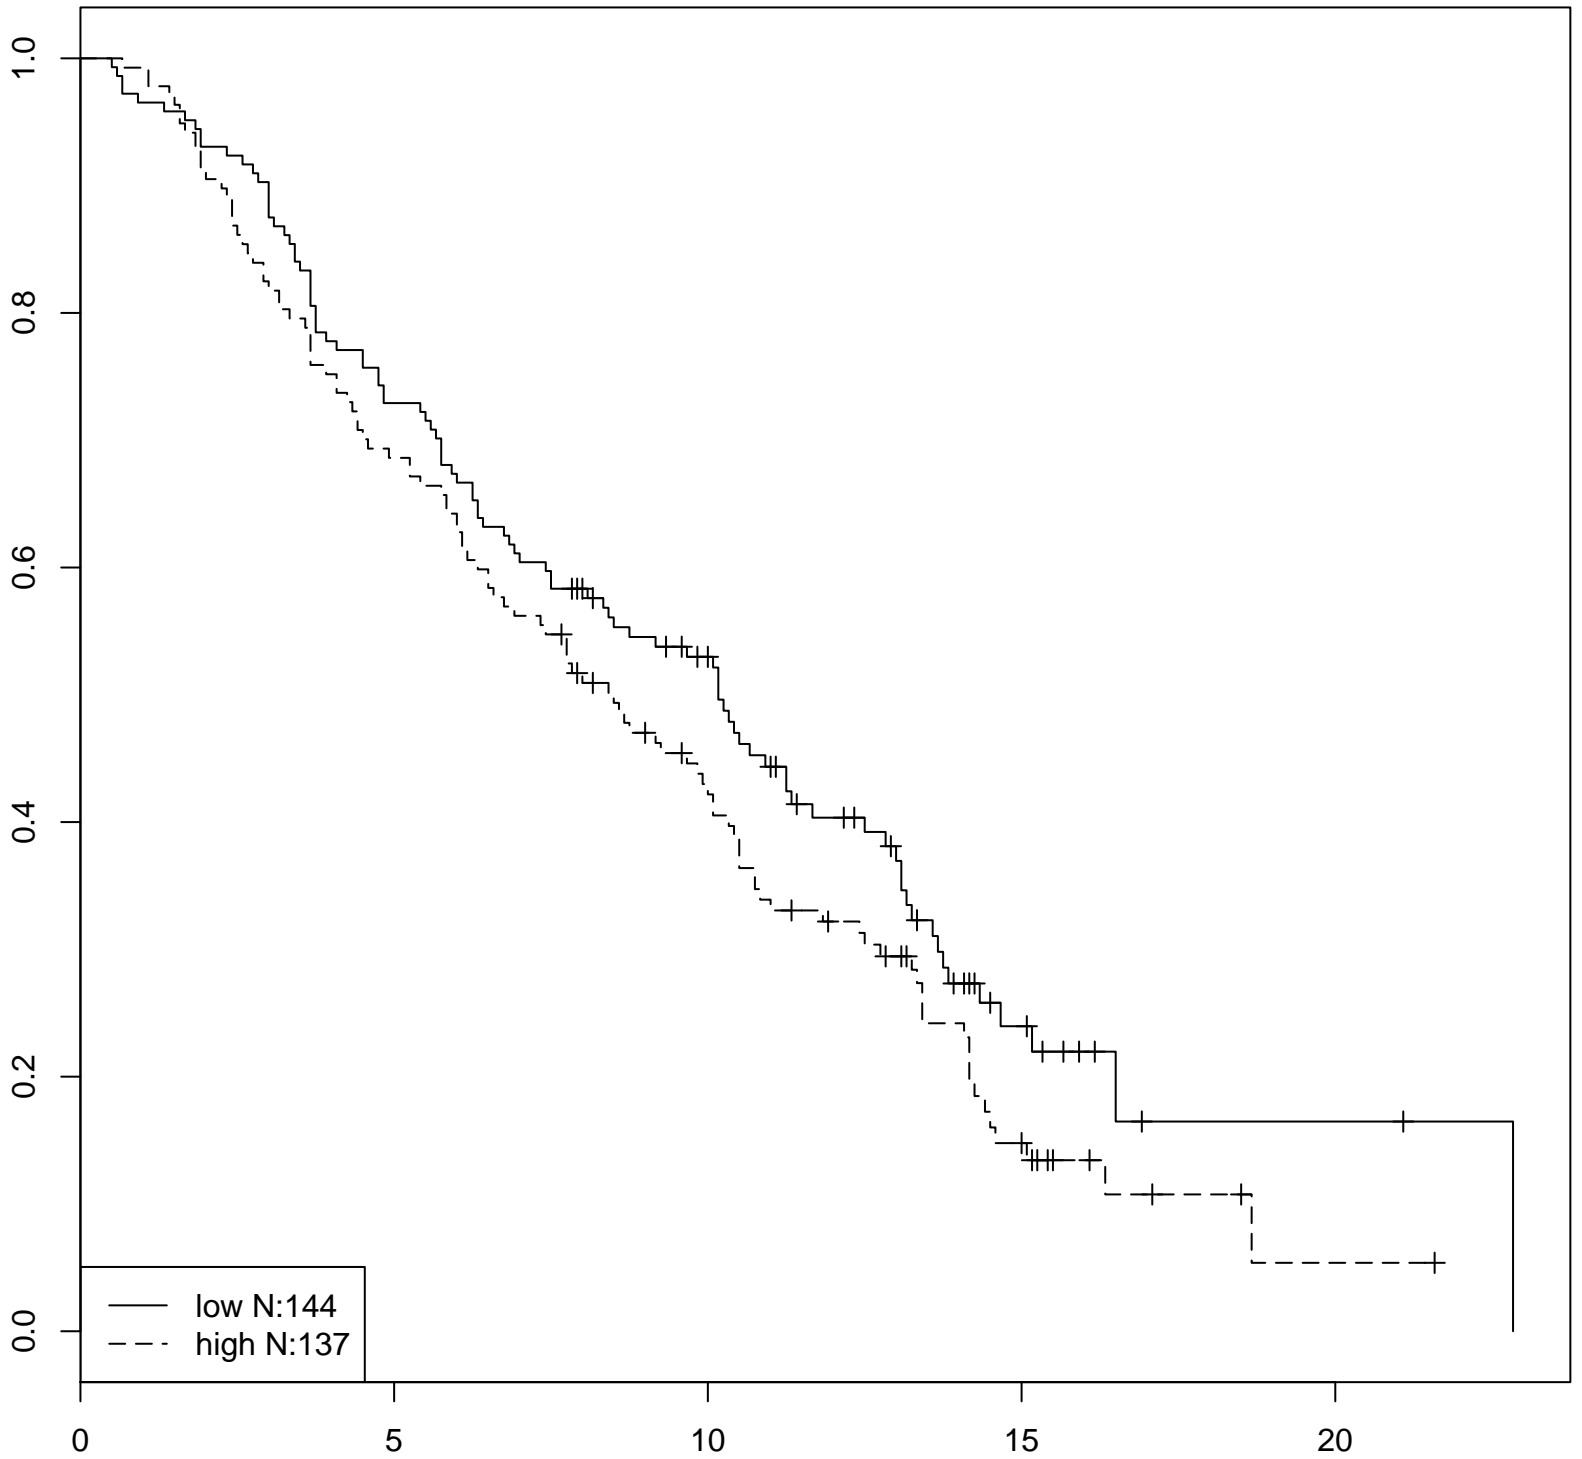

# Survival by HPN expression

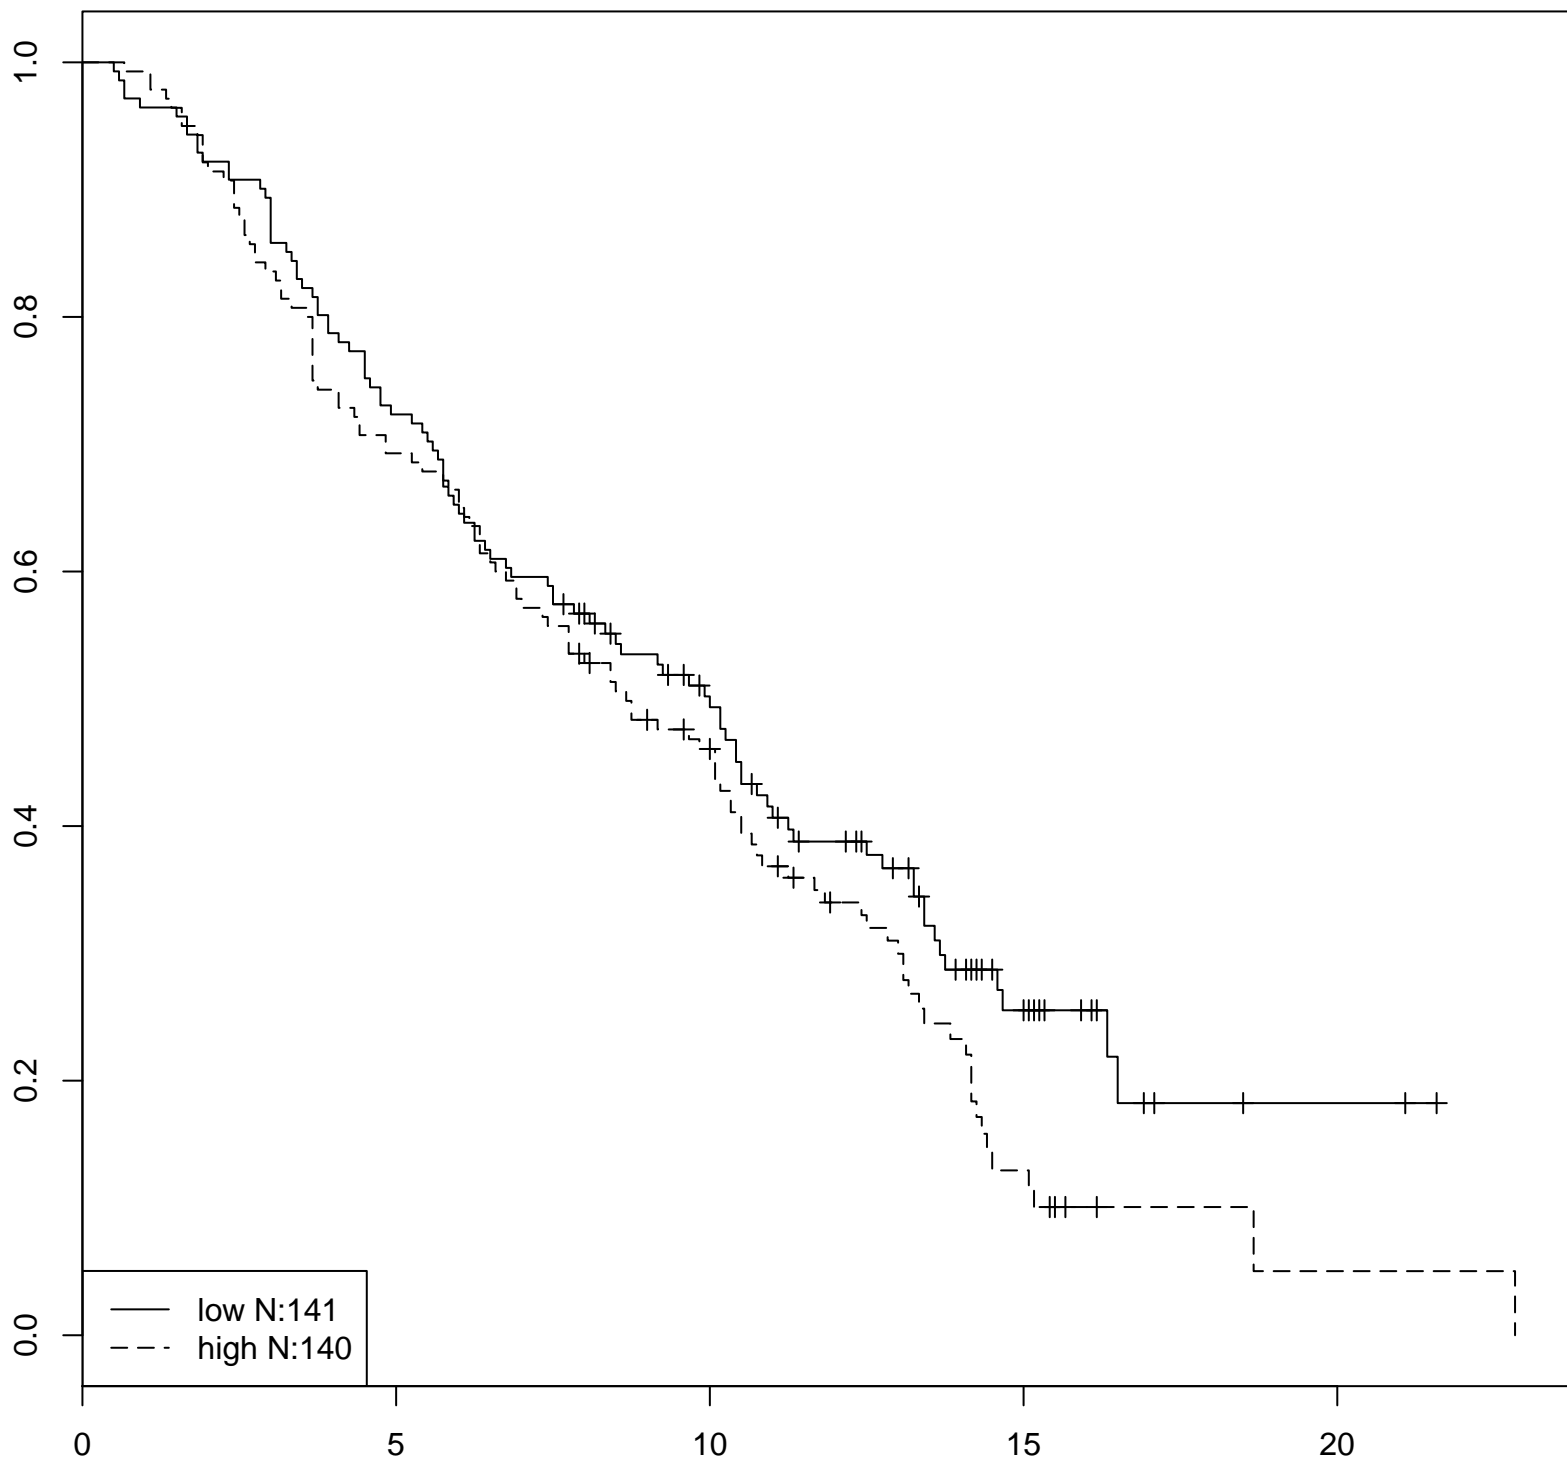

years

log-rank test p-value = 0.094

# Survival by HSD17B3 expression

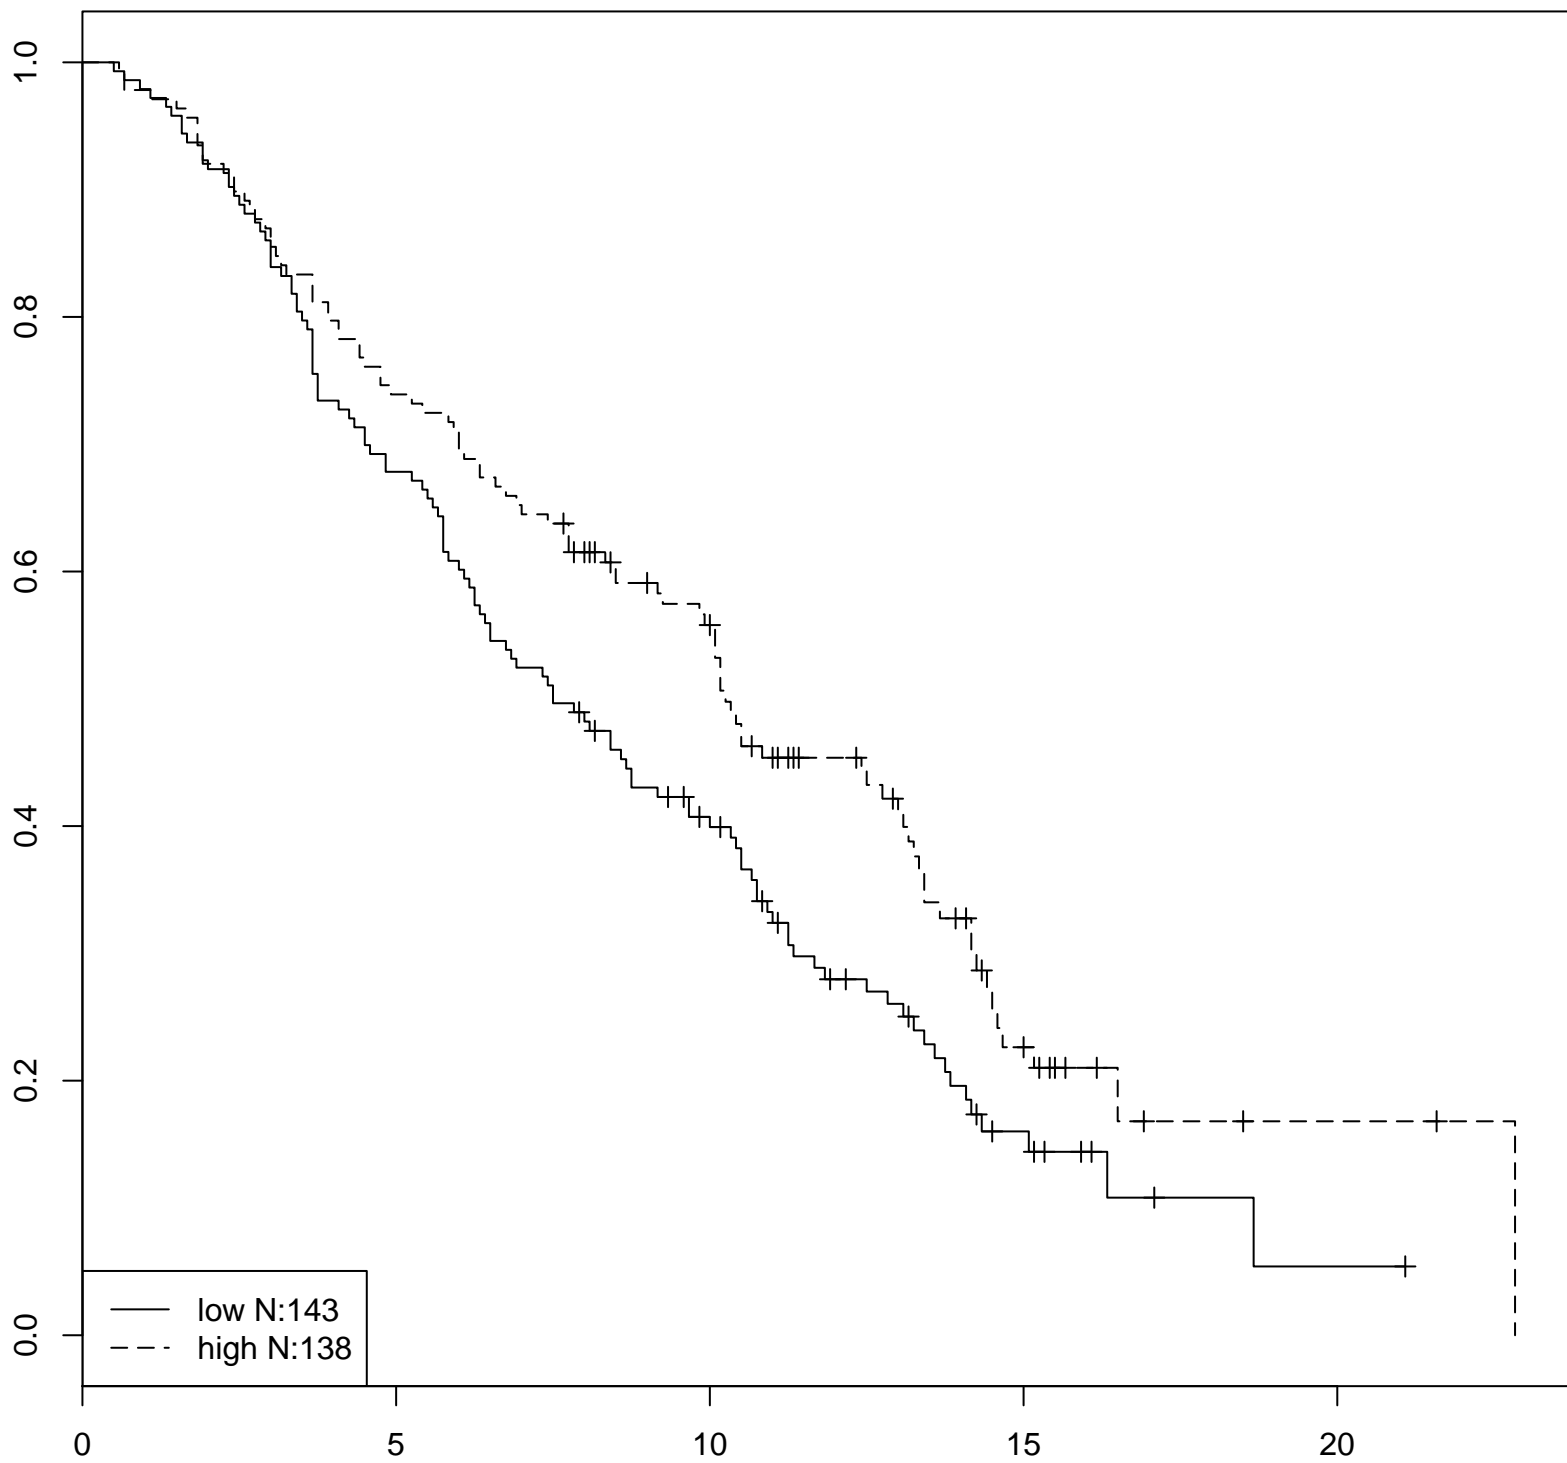

years

log-rank test p-value = 0.014

# Survival by HSPA5 expression

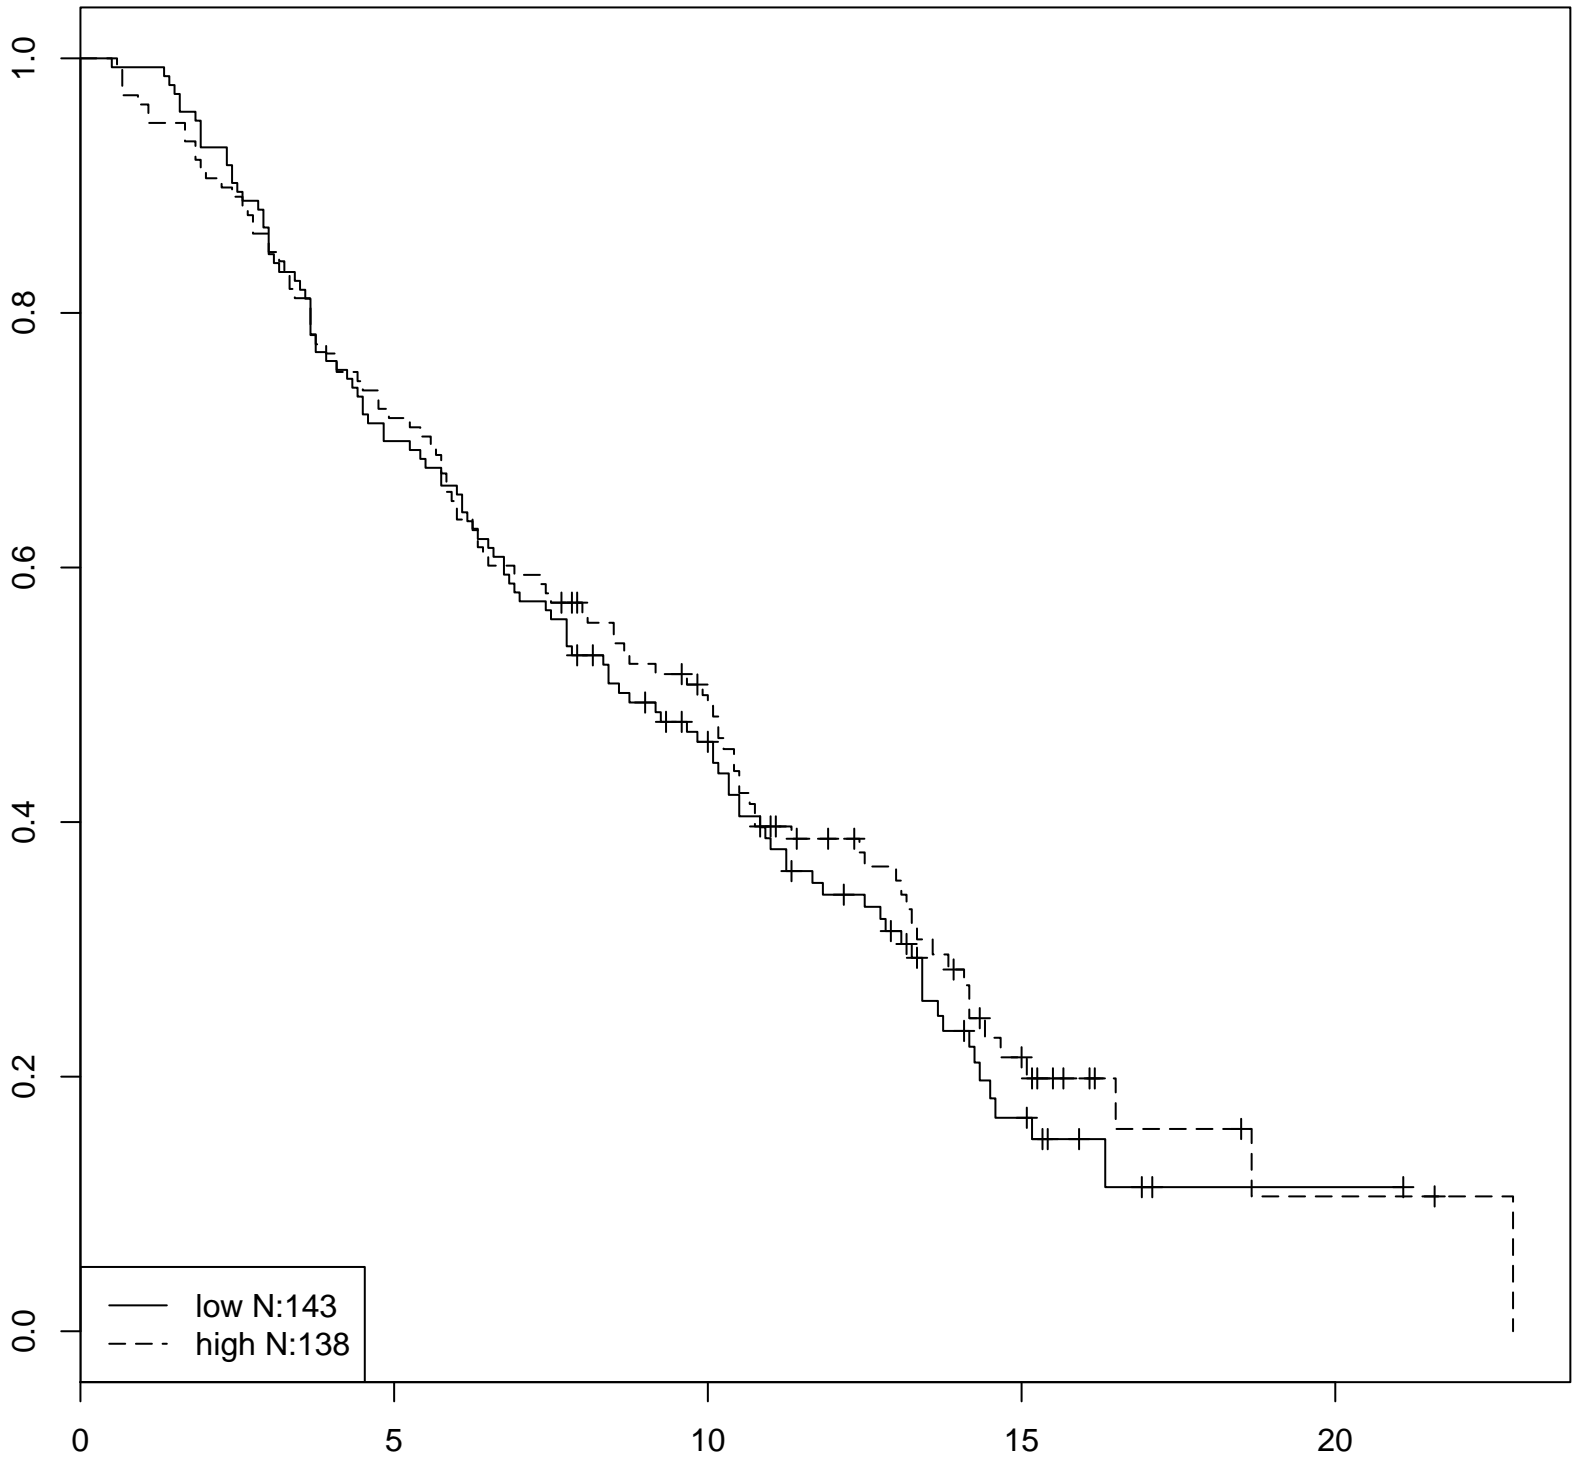

years

log-rank test p-value = 0.534

# Survival by HSPD1 expression

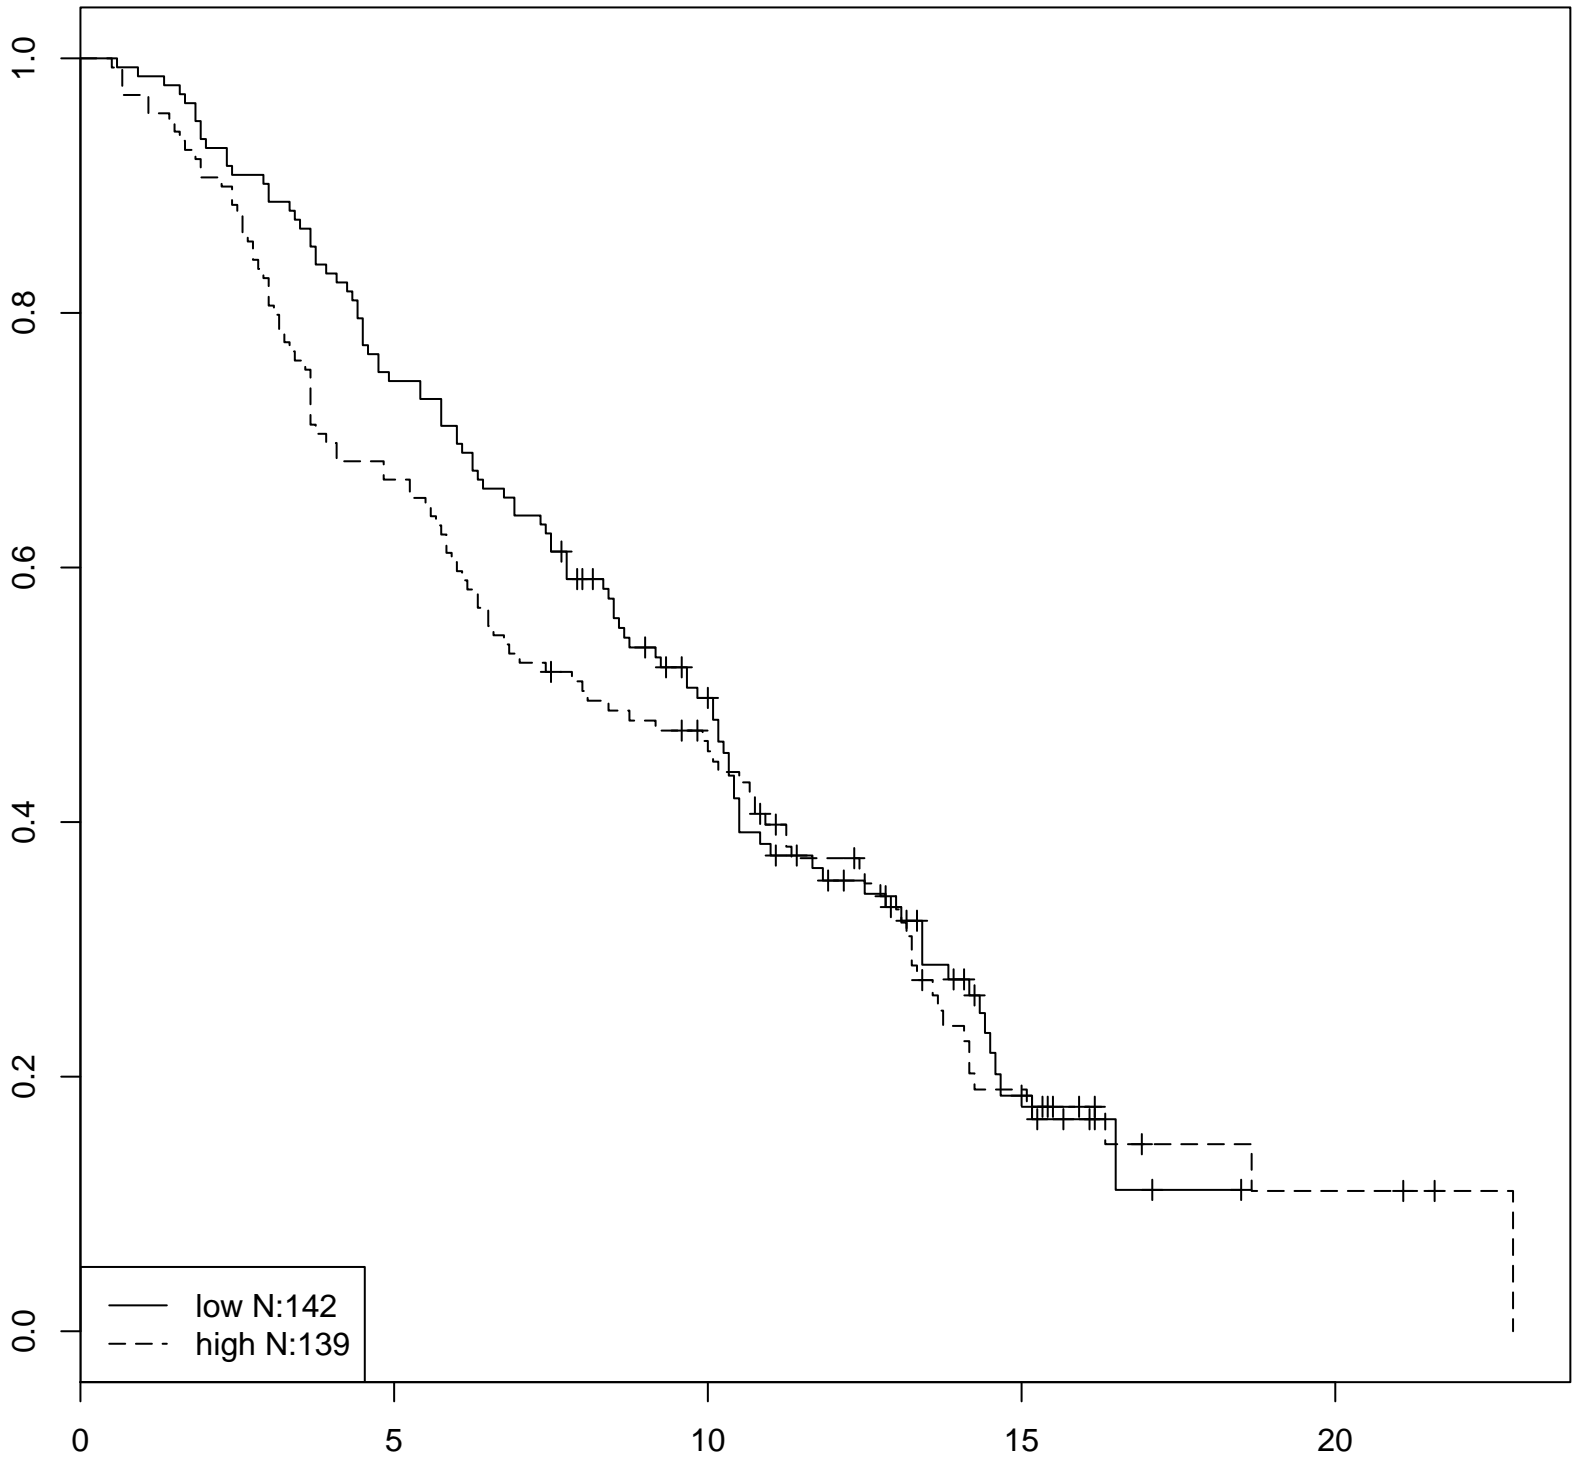

years

log-rank test p-value = 0.443



# Survival by HTR3A expression

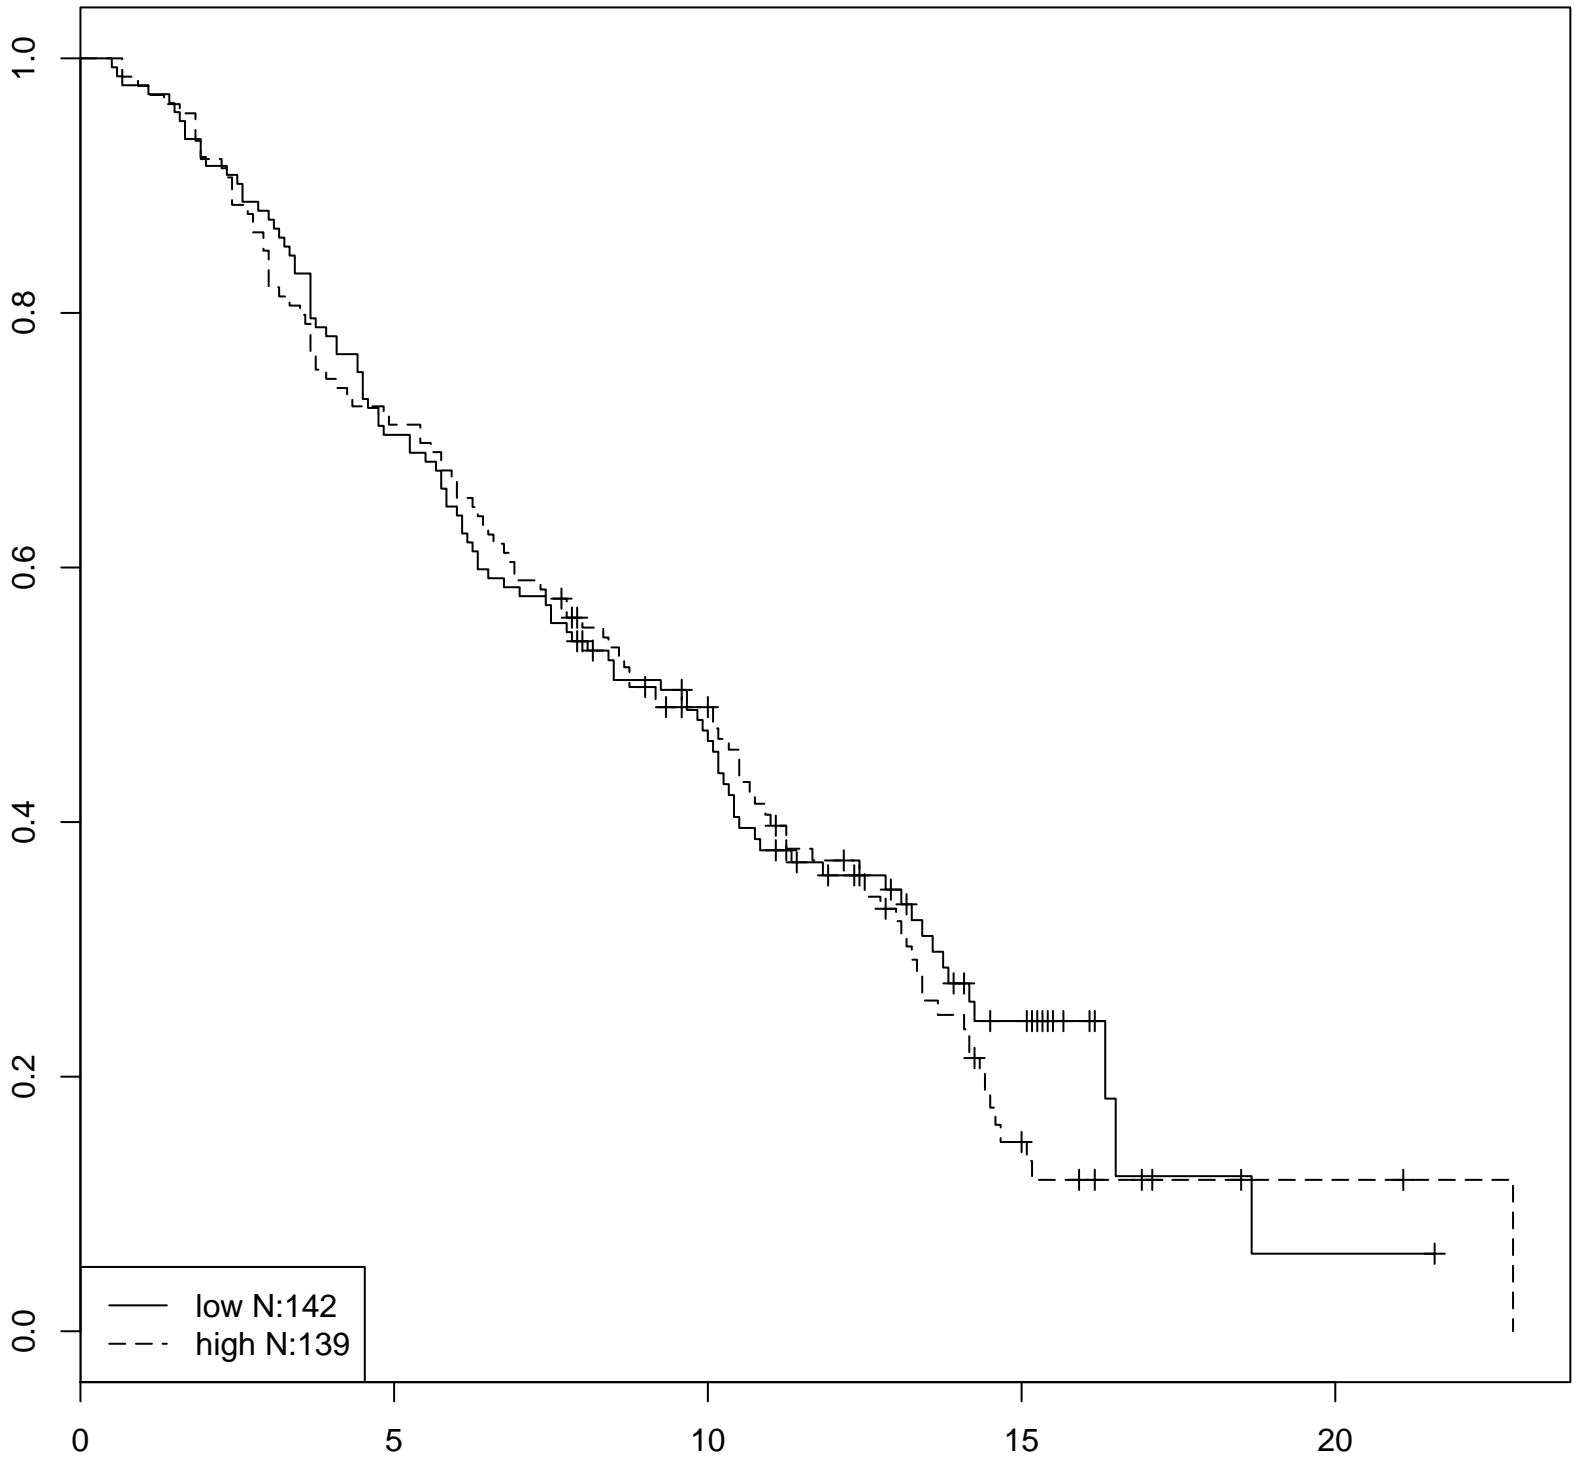

years

log-rank test p-value = 0.638

# Survival by HYAL1 expression

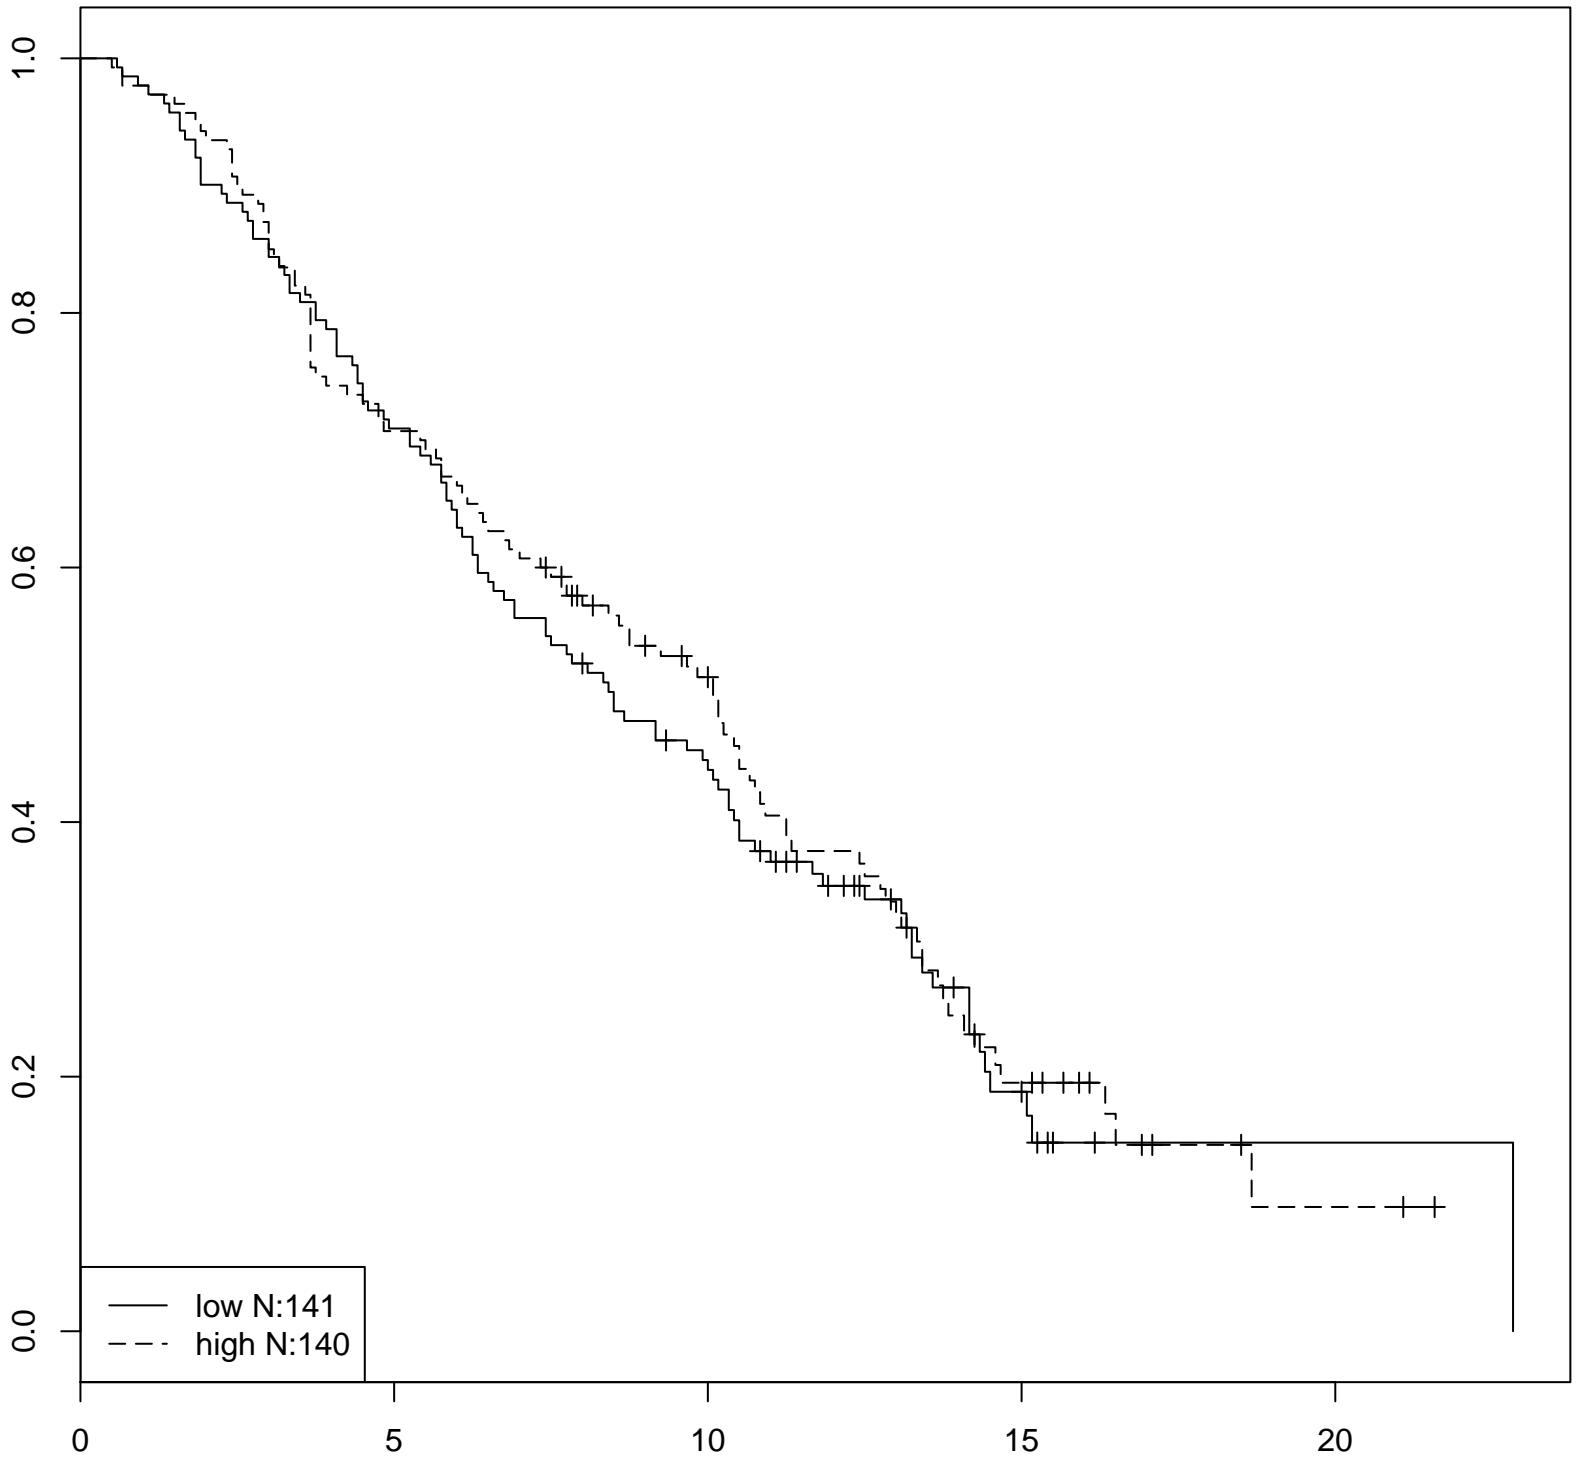

# Survival by ID1 expression

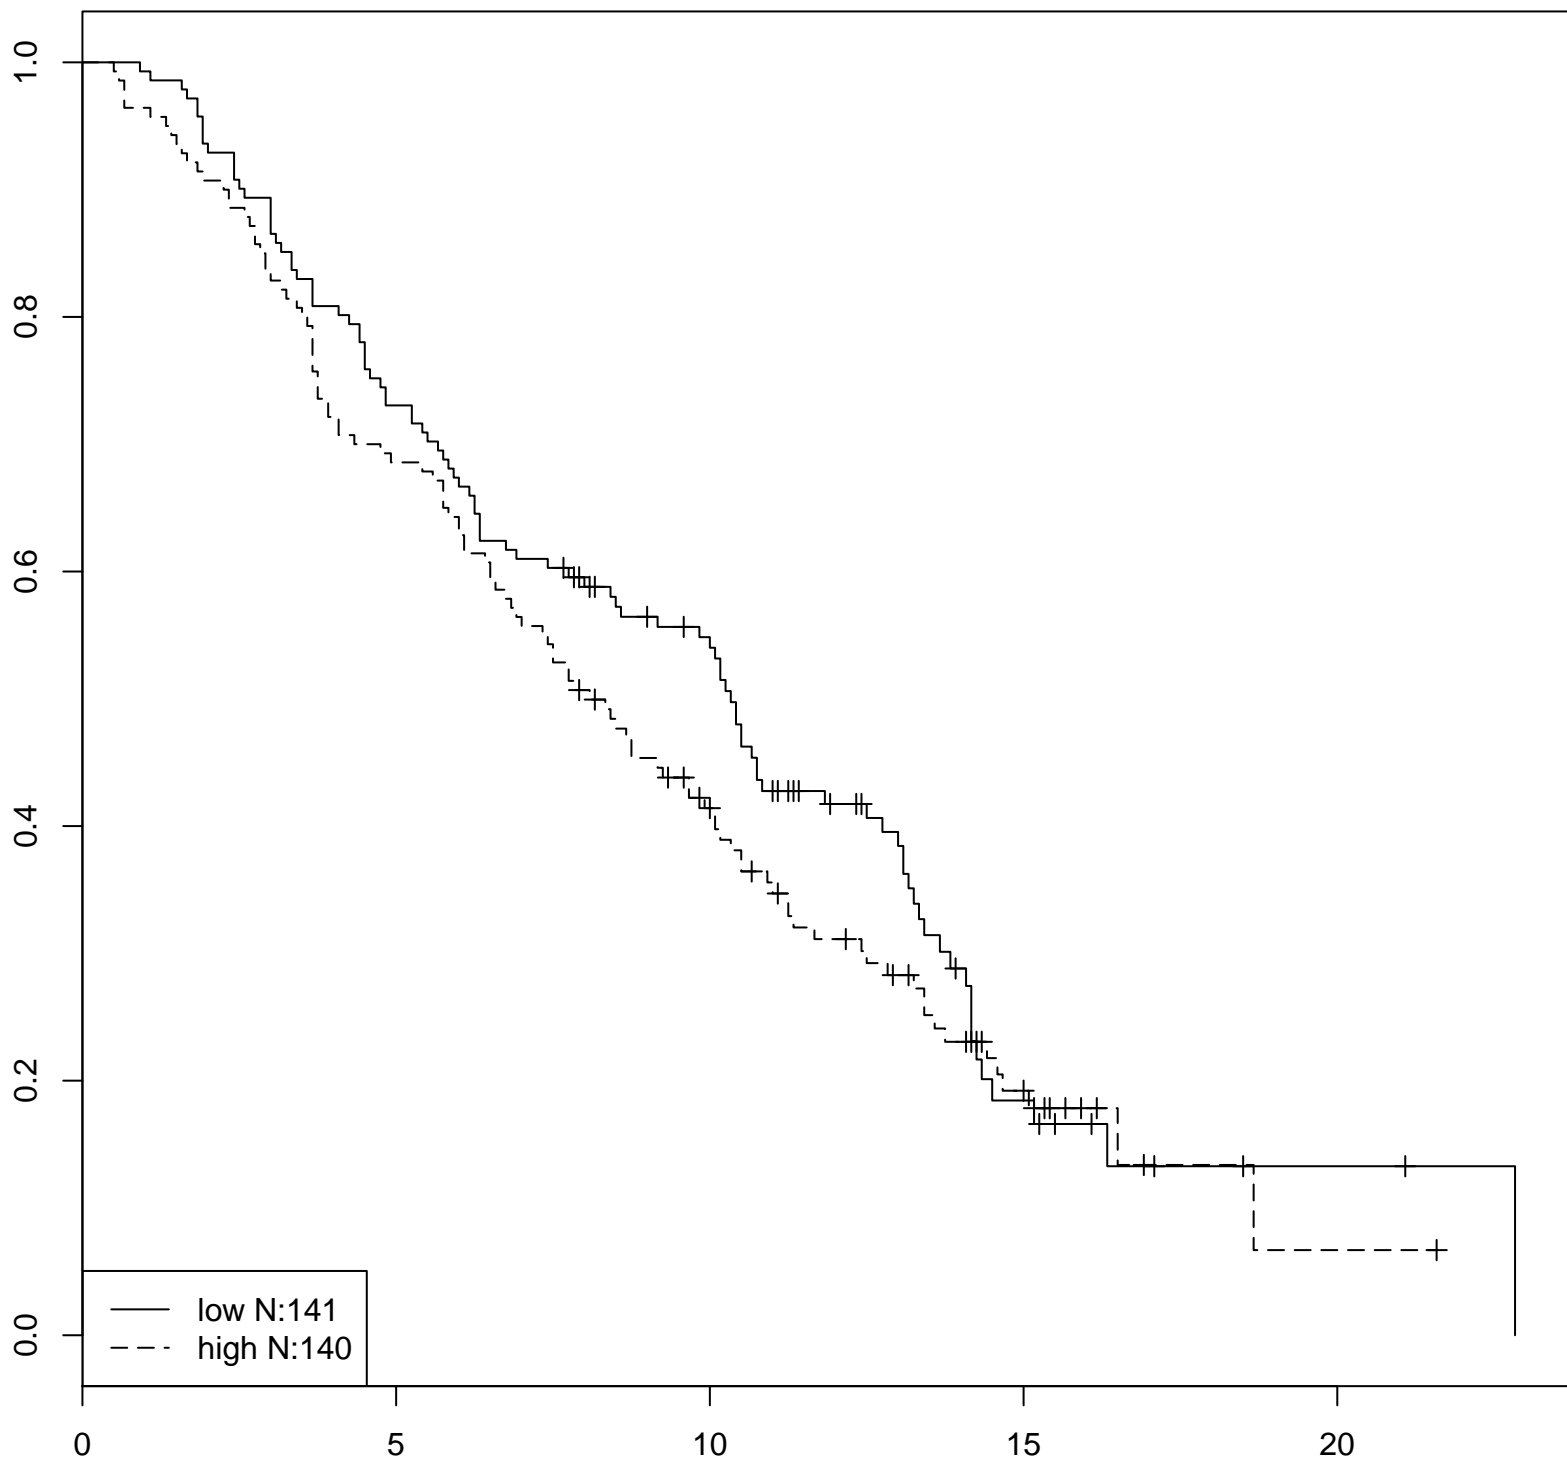

years

log-rank test p-value = 0.235

# Survival by ID2 expression

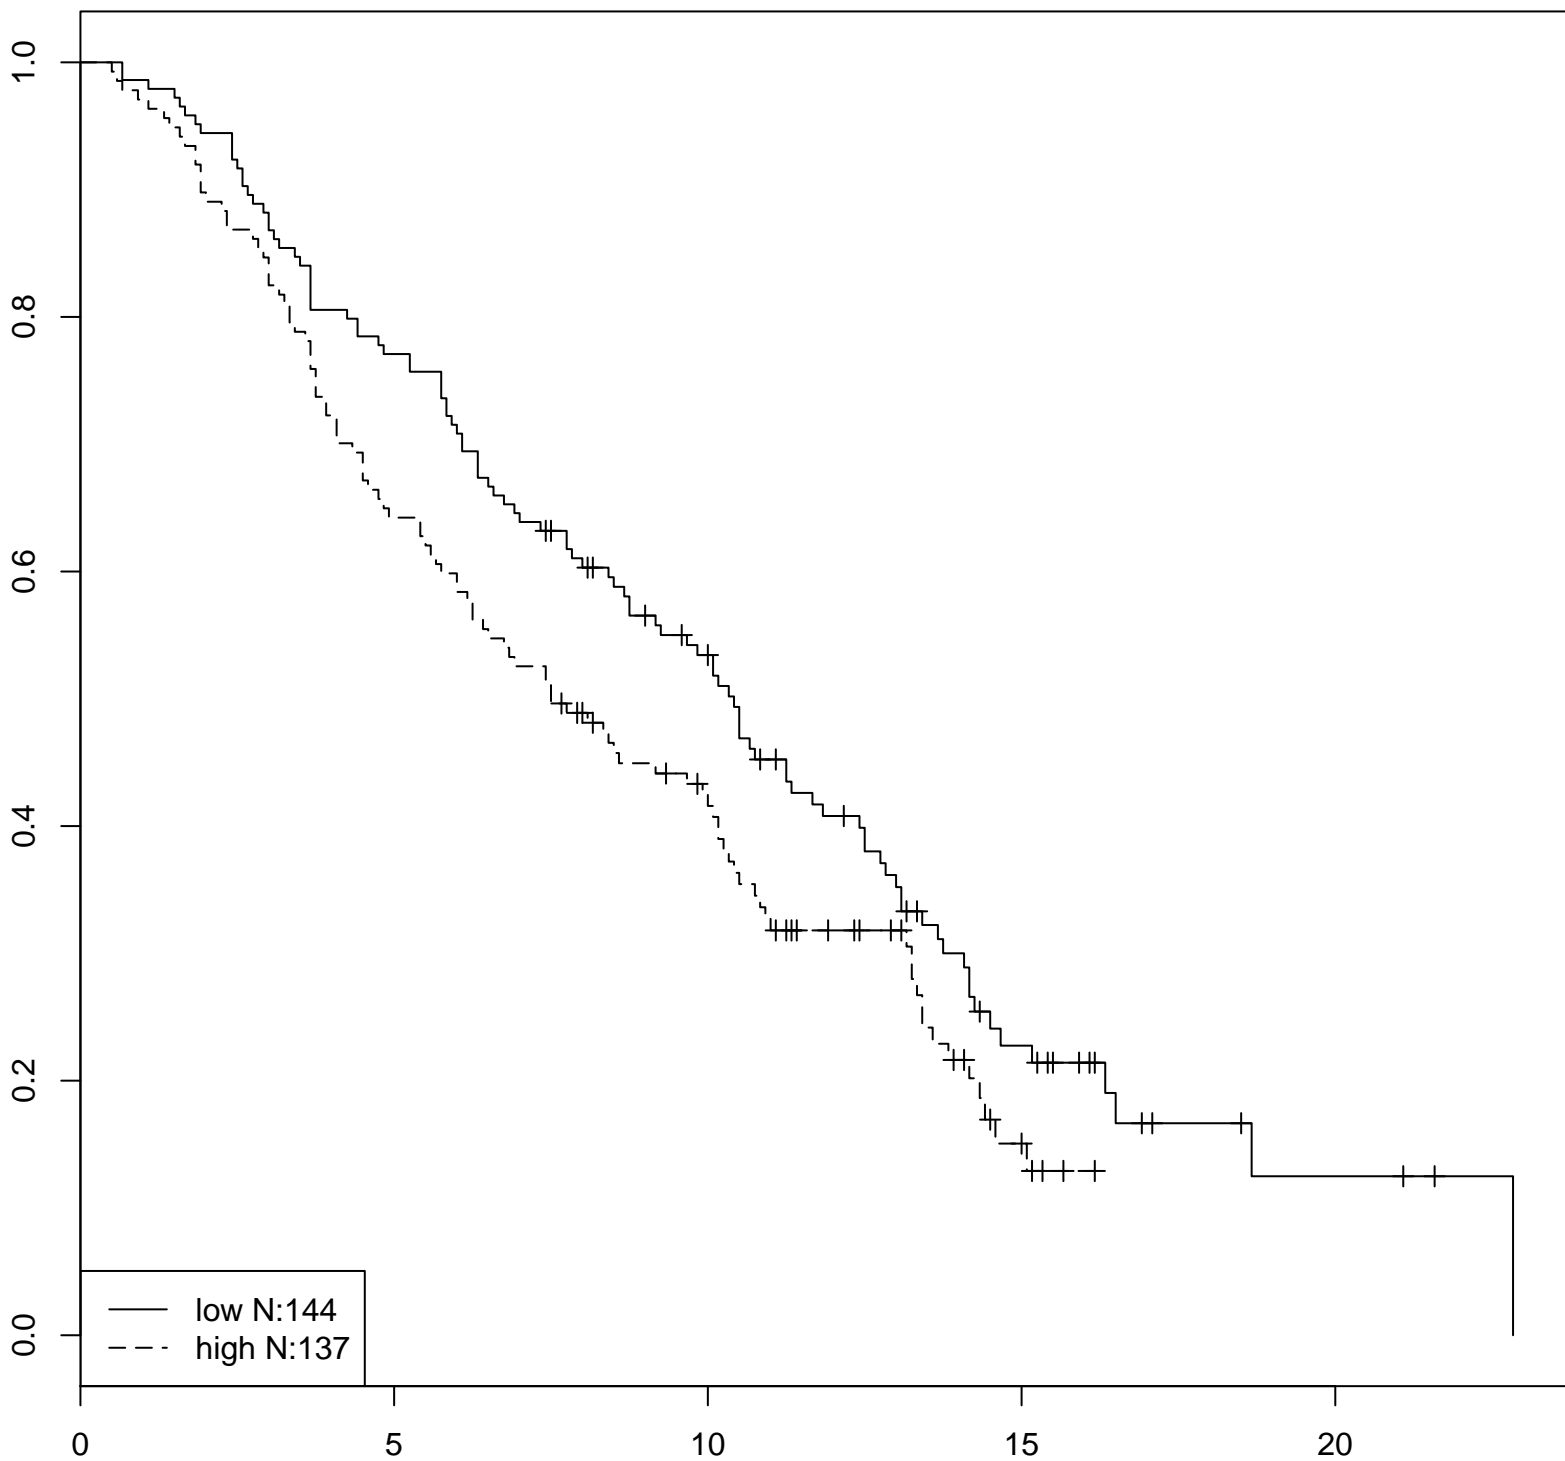

years

log-rank test p-value = 0.038

# Survival by IGF1R expression

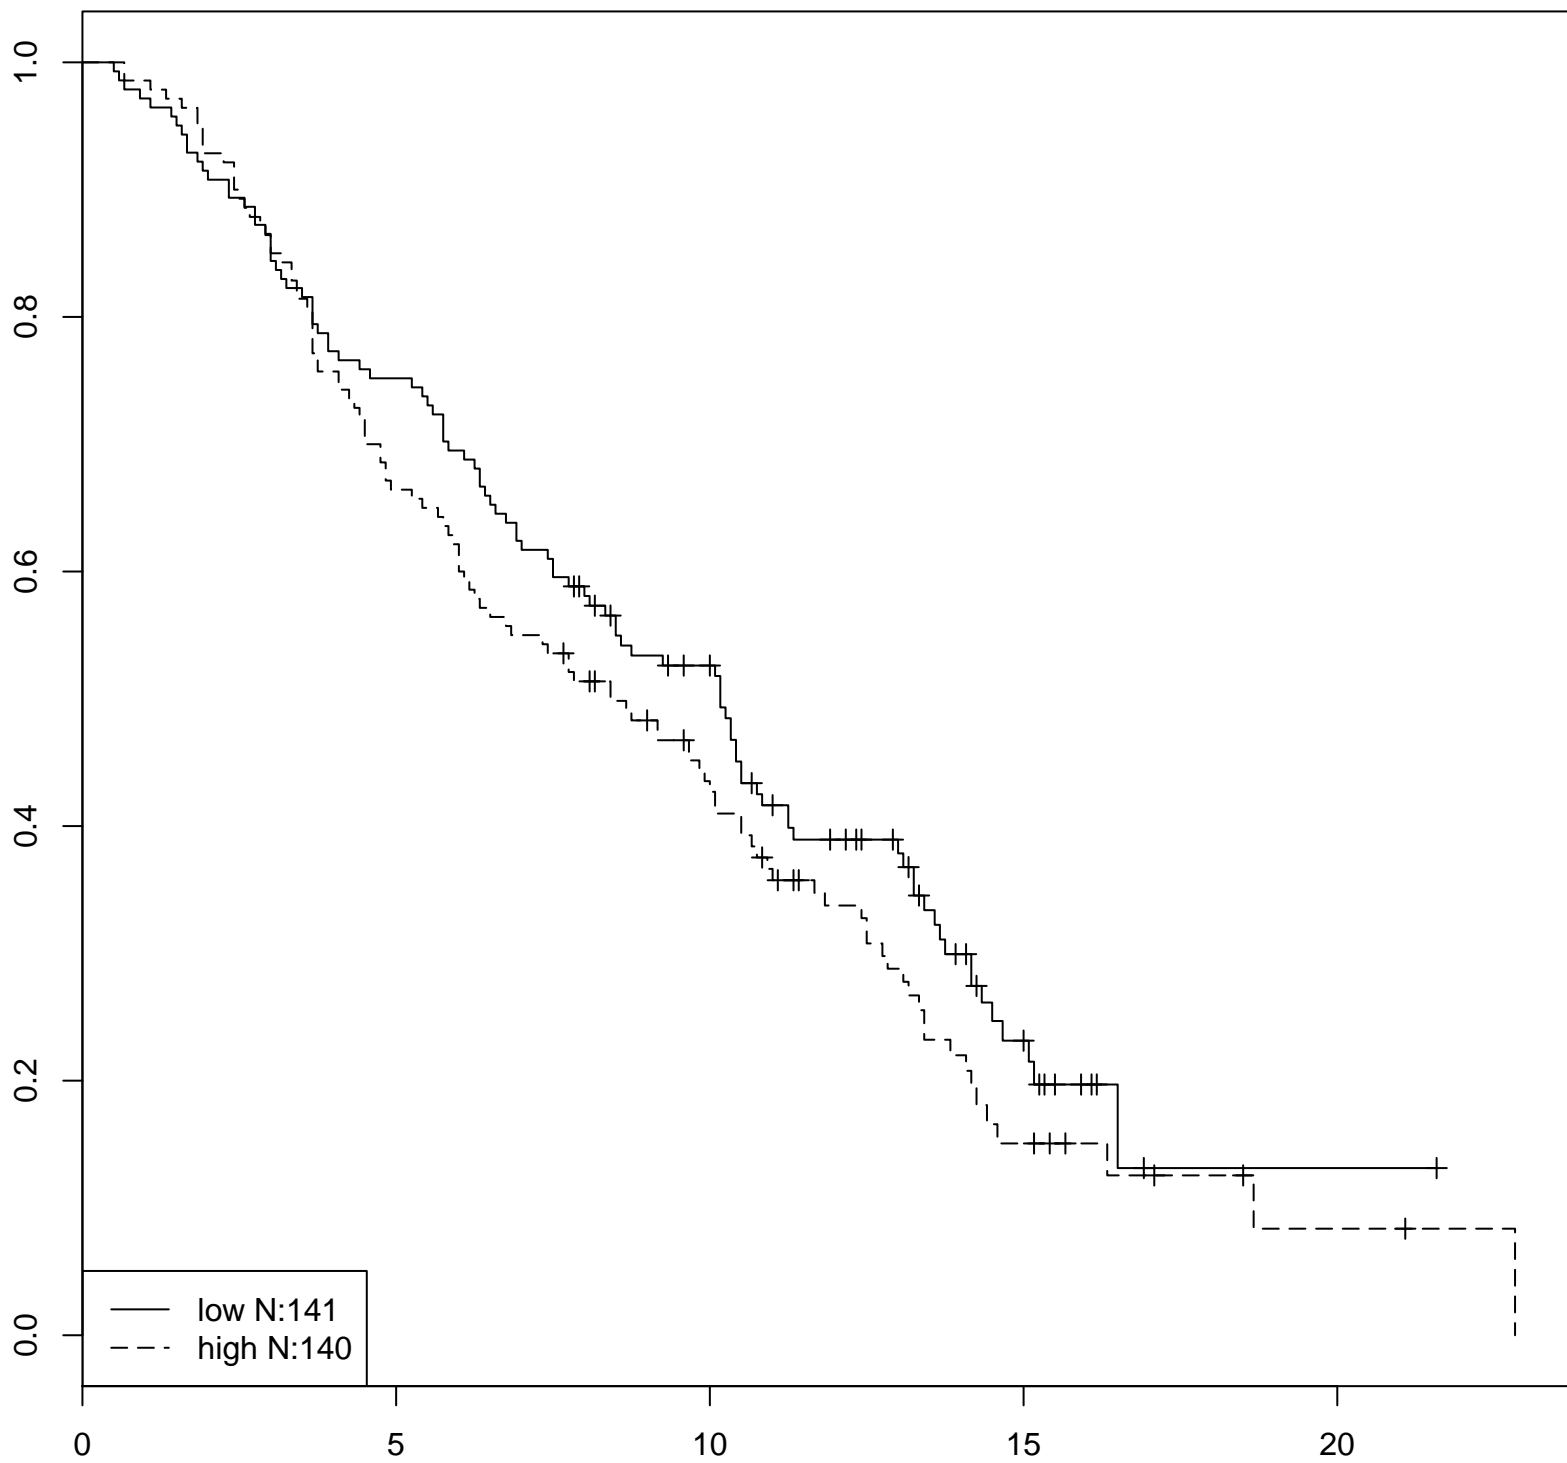

# Survival by IGF2BP3 expression

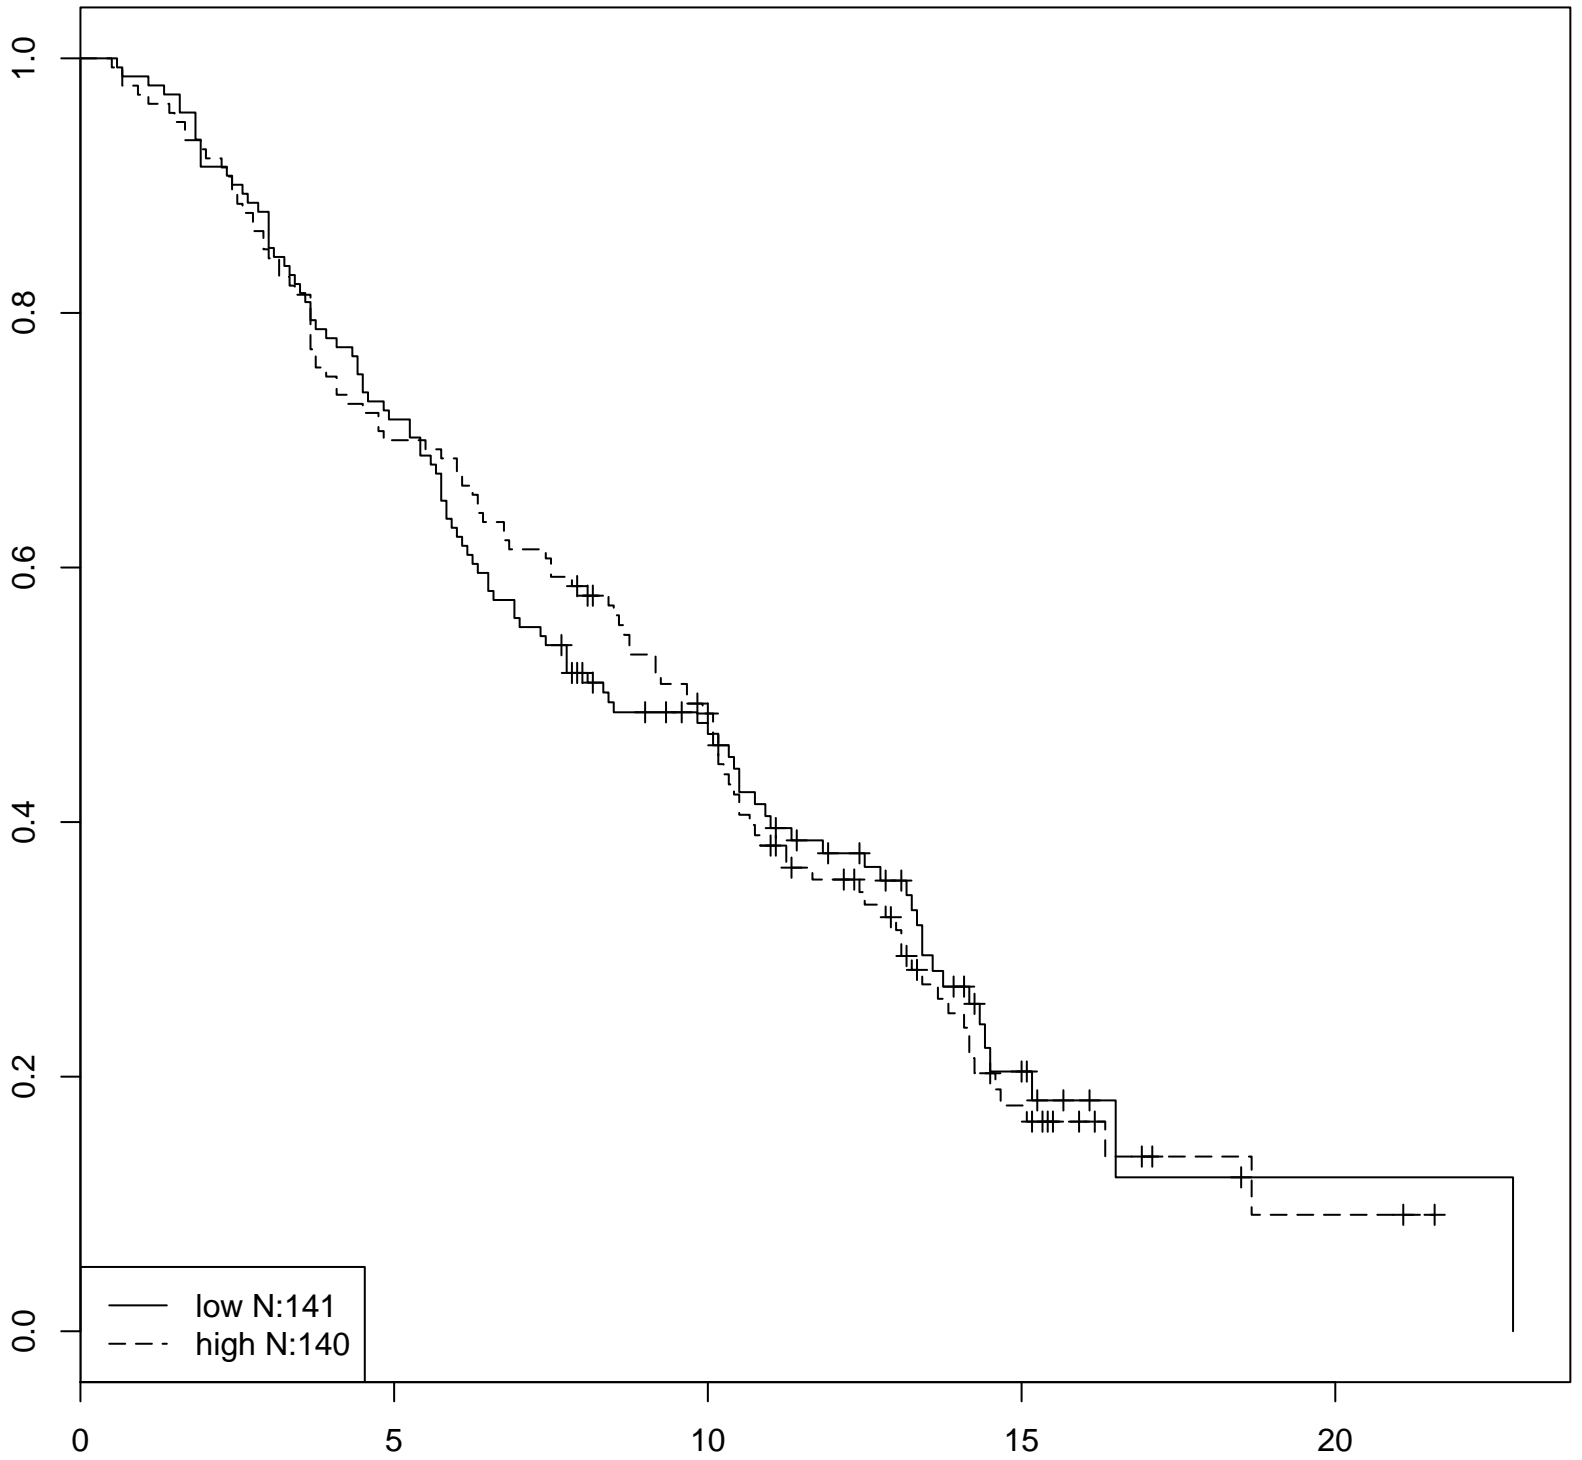

years

log-rank test p-value = 0.874

# Survival by IGFBP2 expression

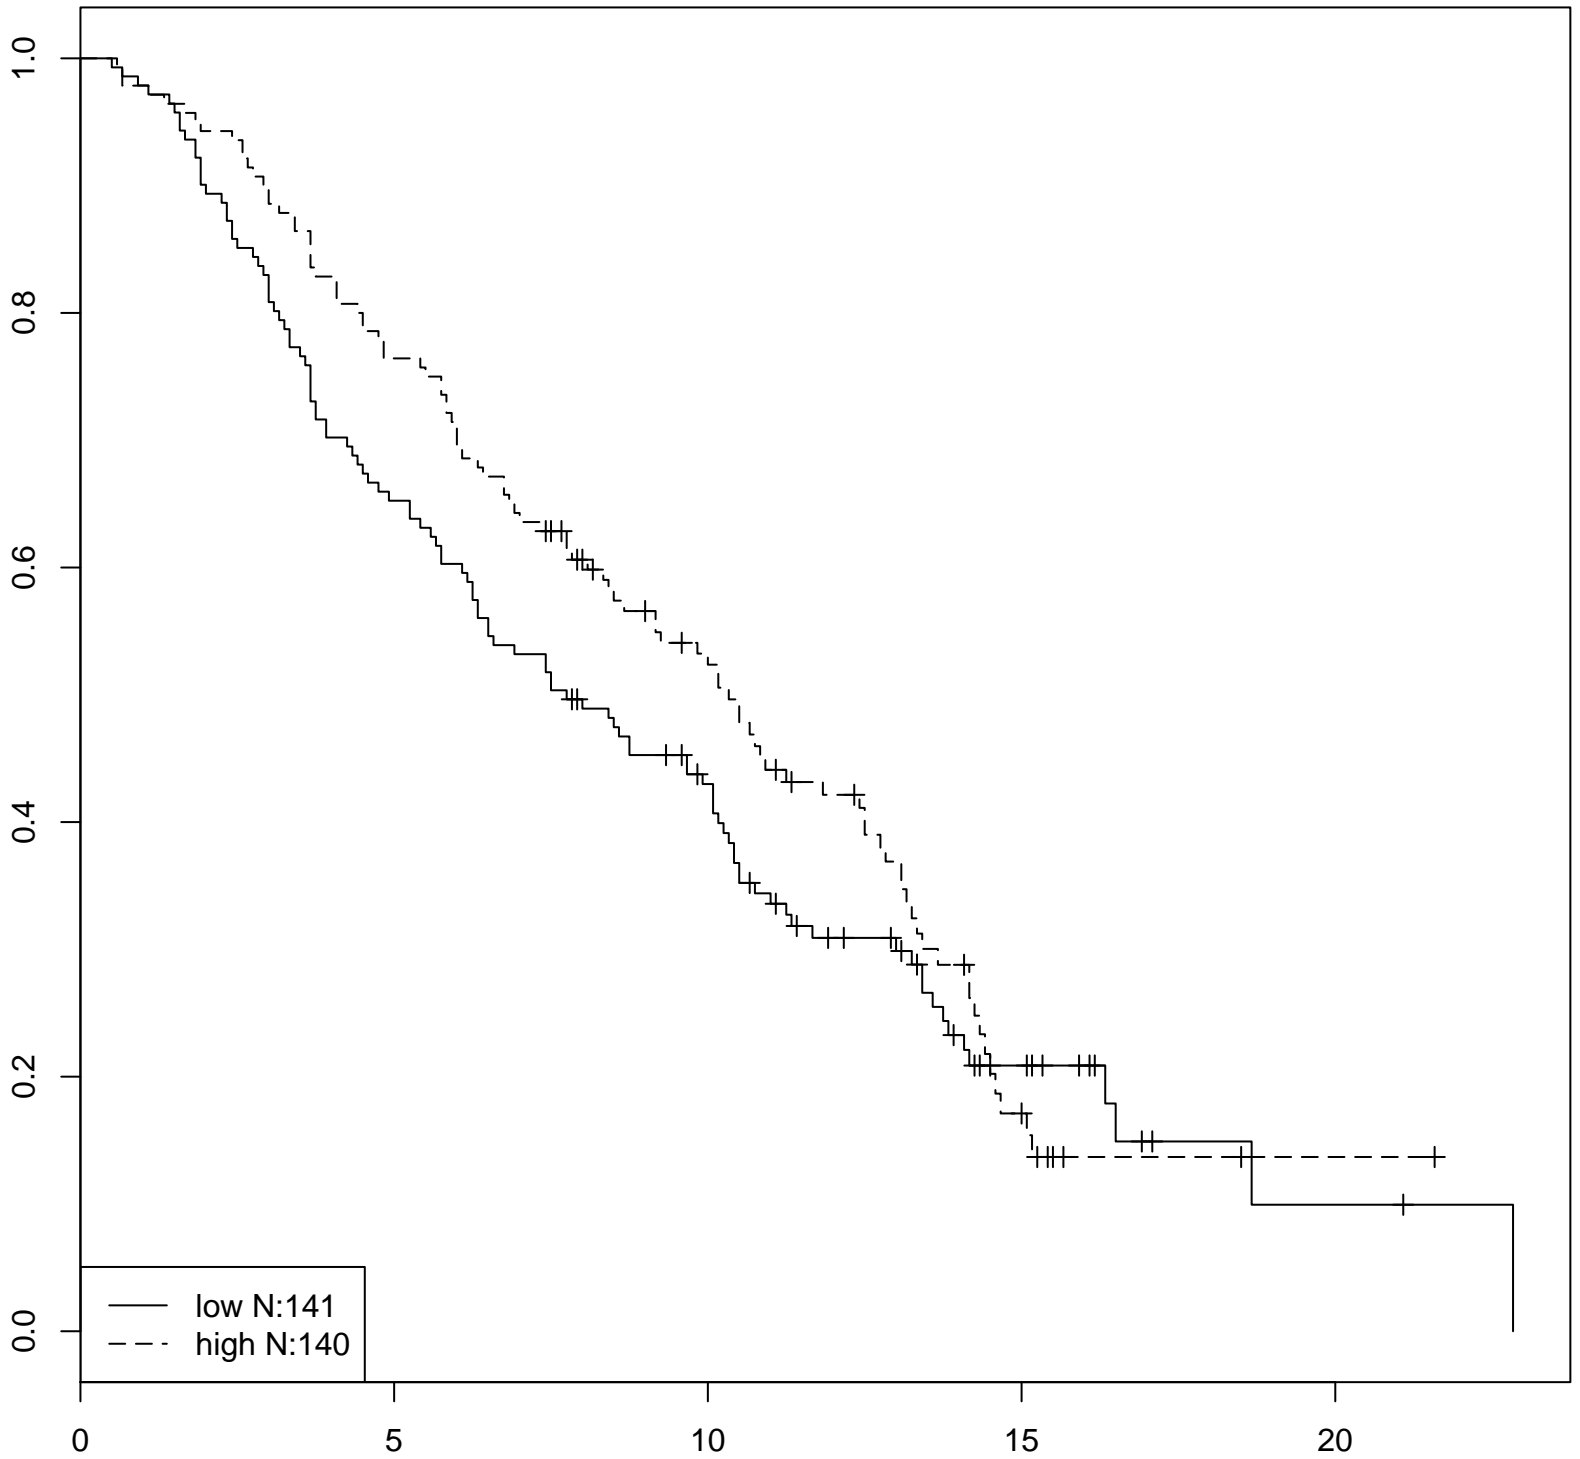

# Survival by IGFBP3 expression

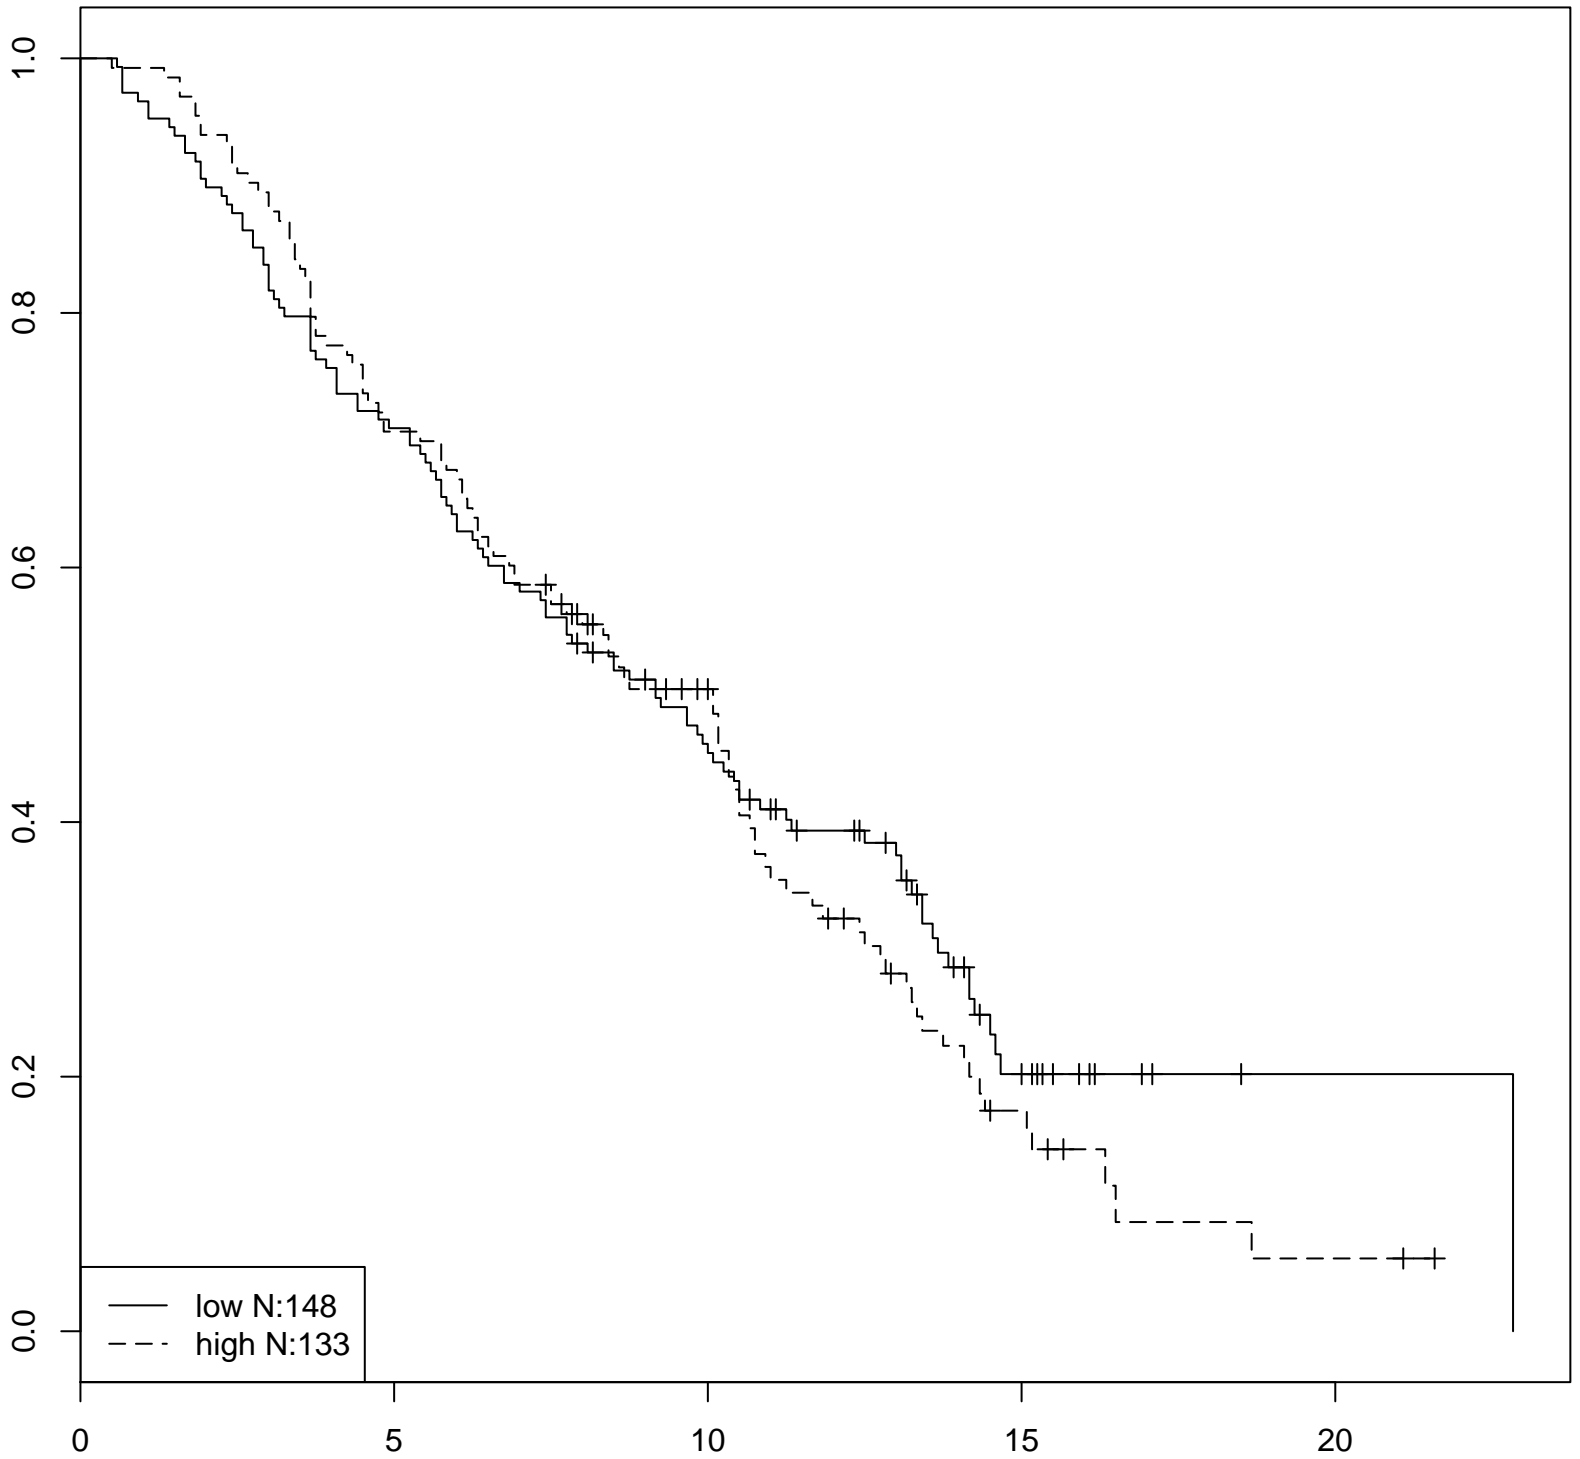

years

log-rank test p-value = 0.448



# Survival by IL11 expression

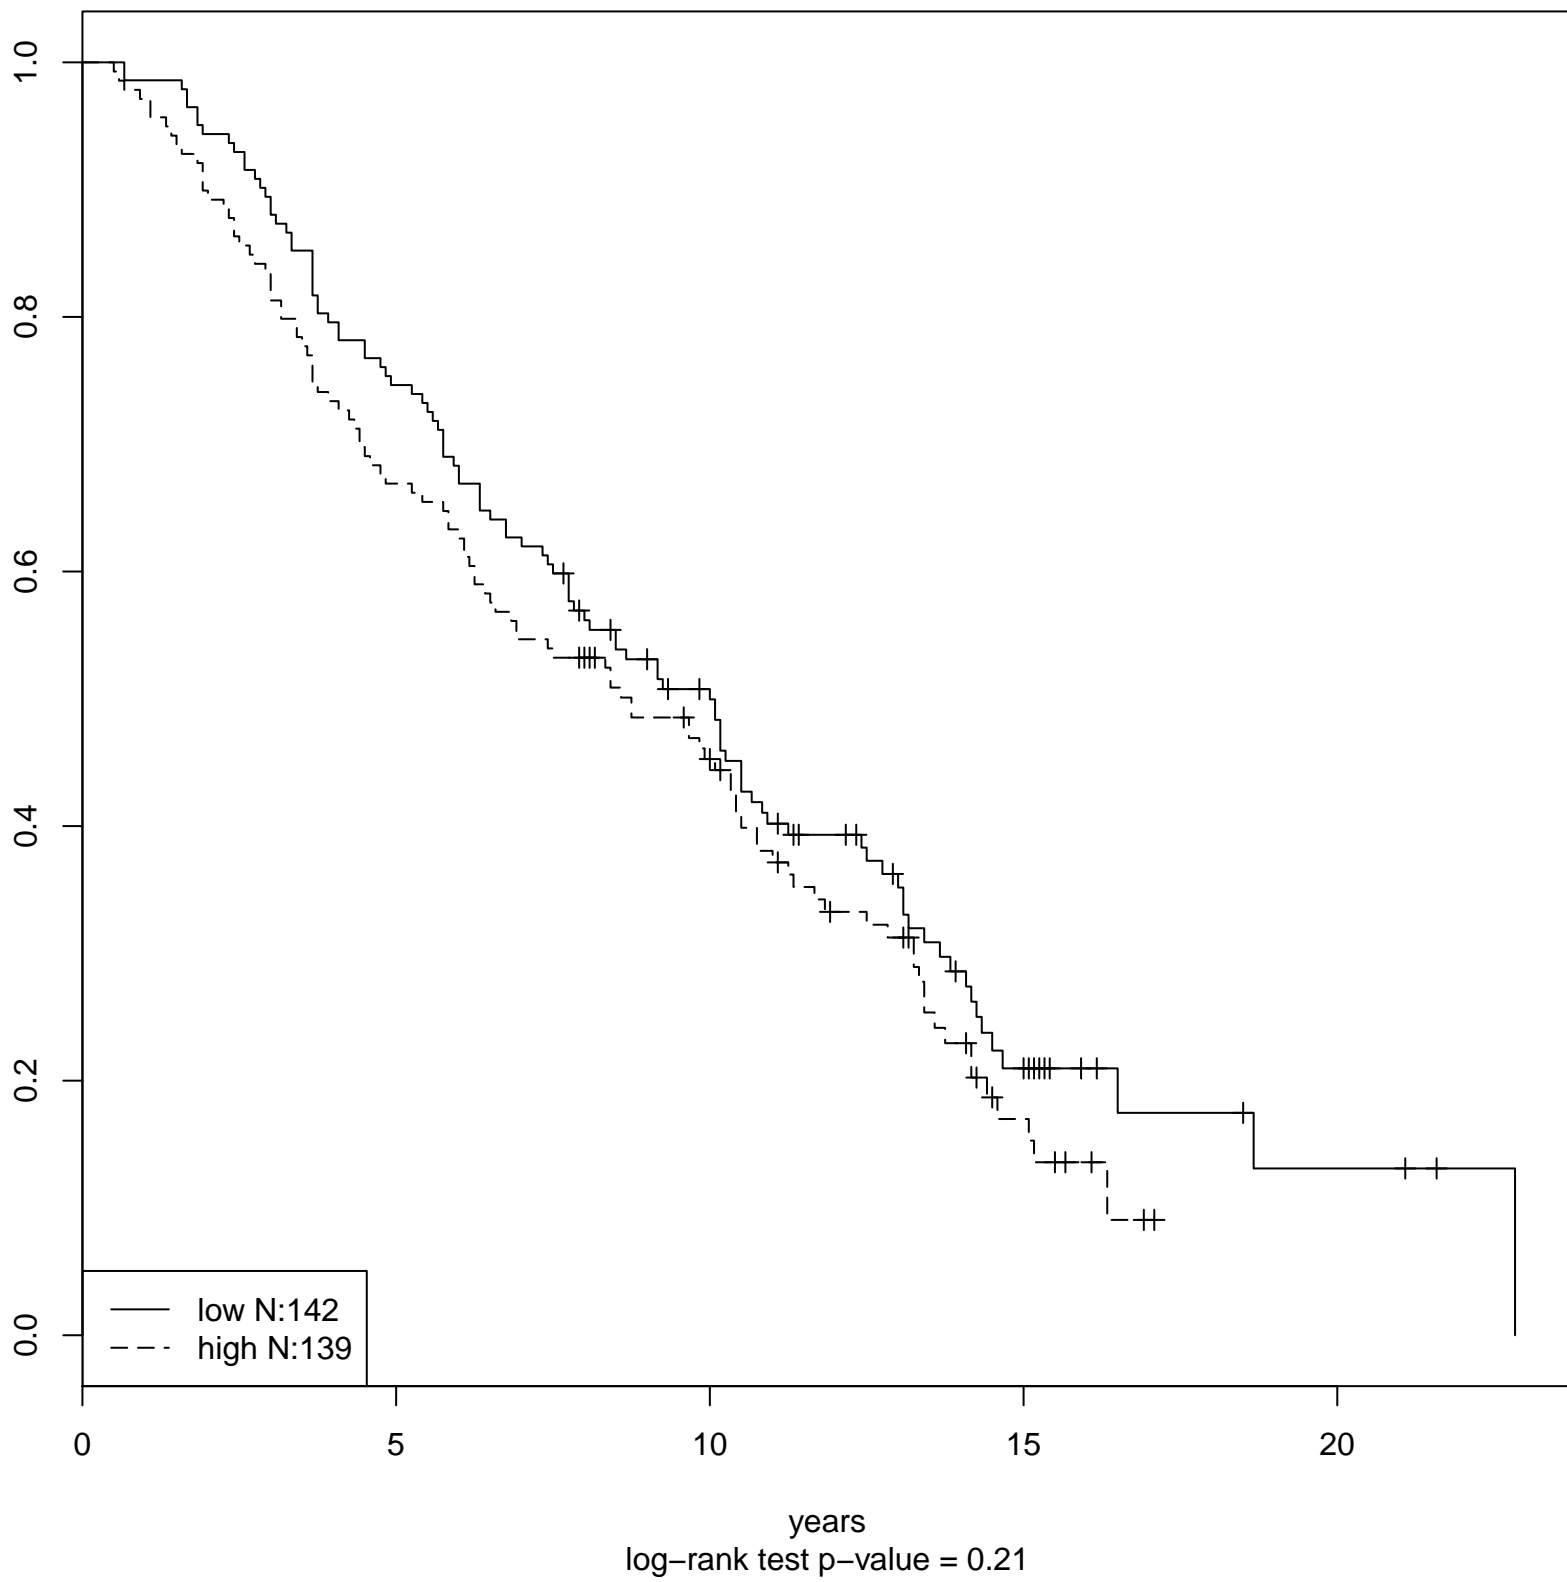

# Survival by IL32 expression

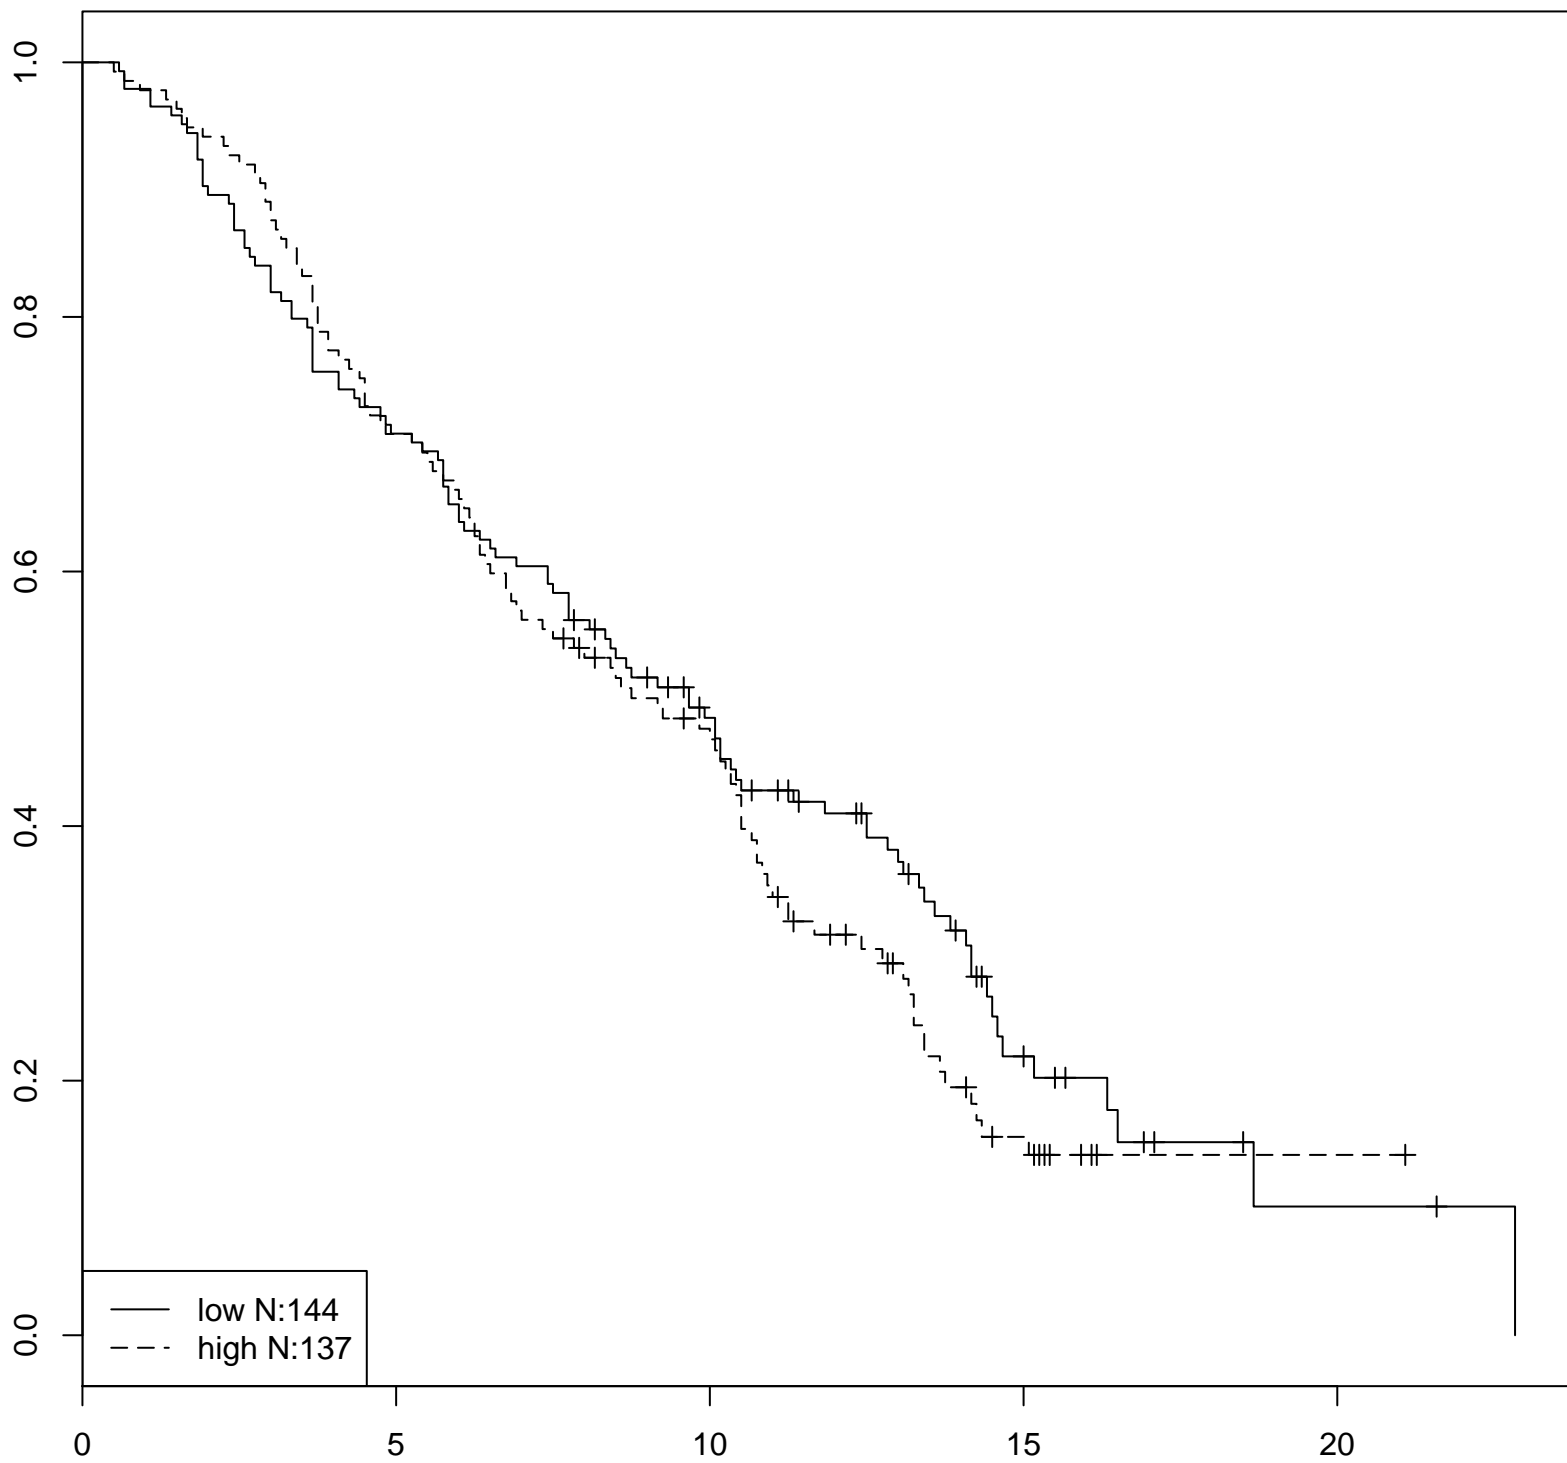

years

log-rank test p-value = 0.293

# Survival by IL6 expression

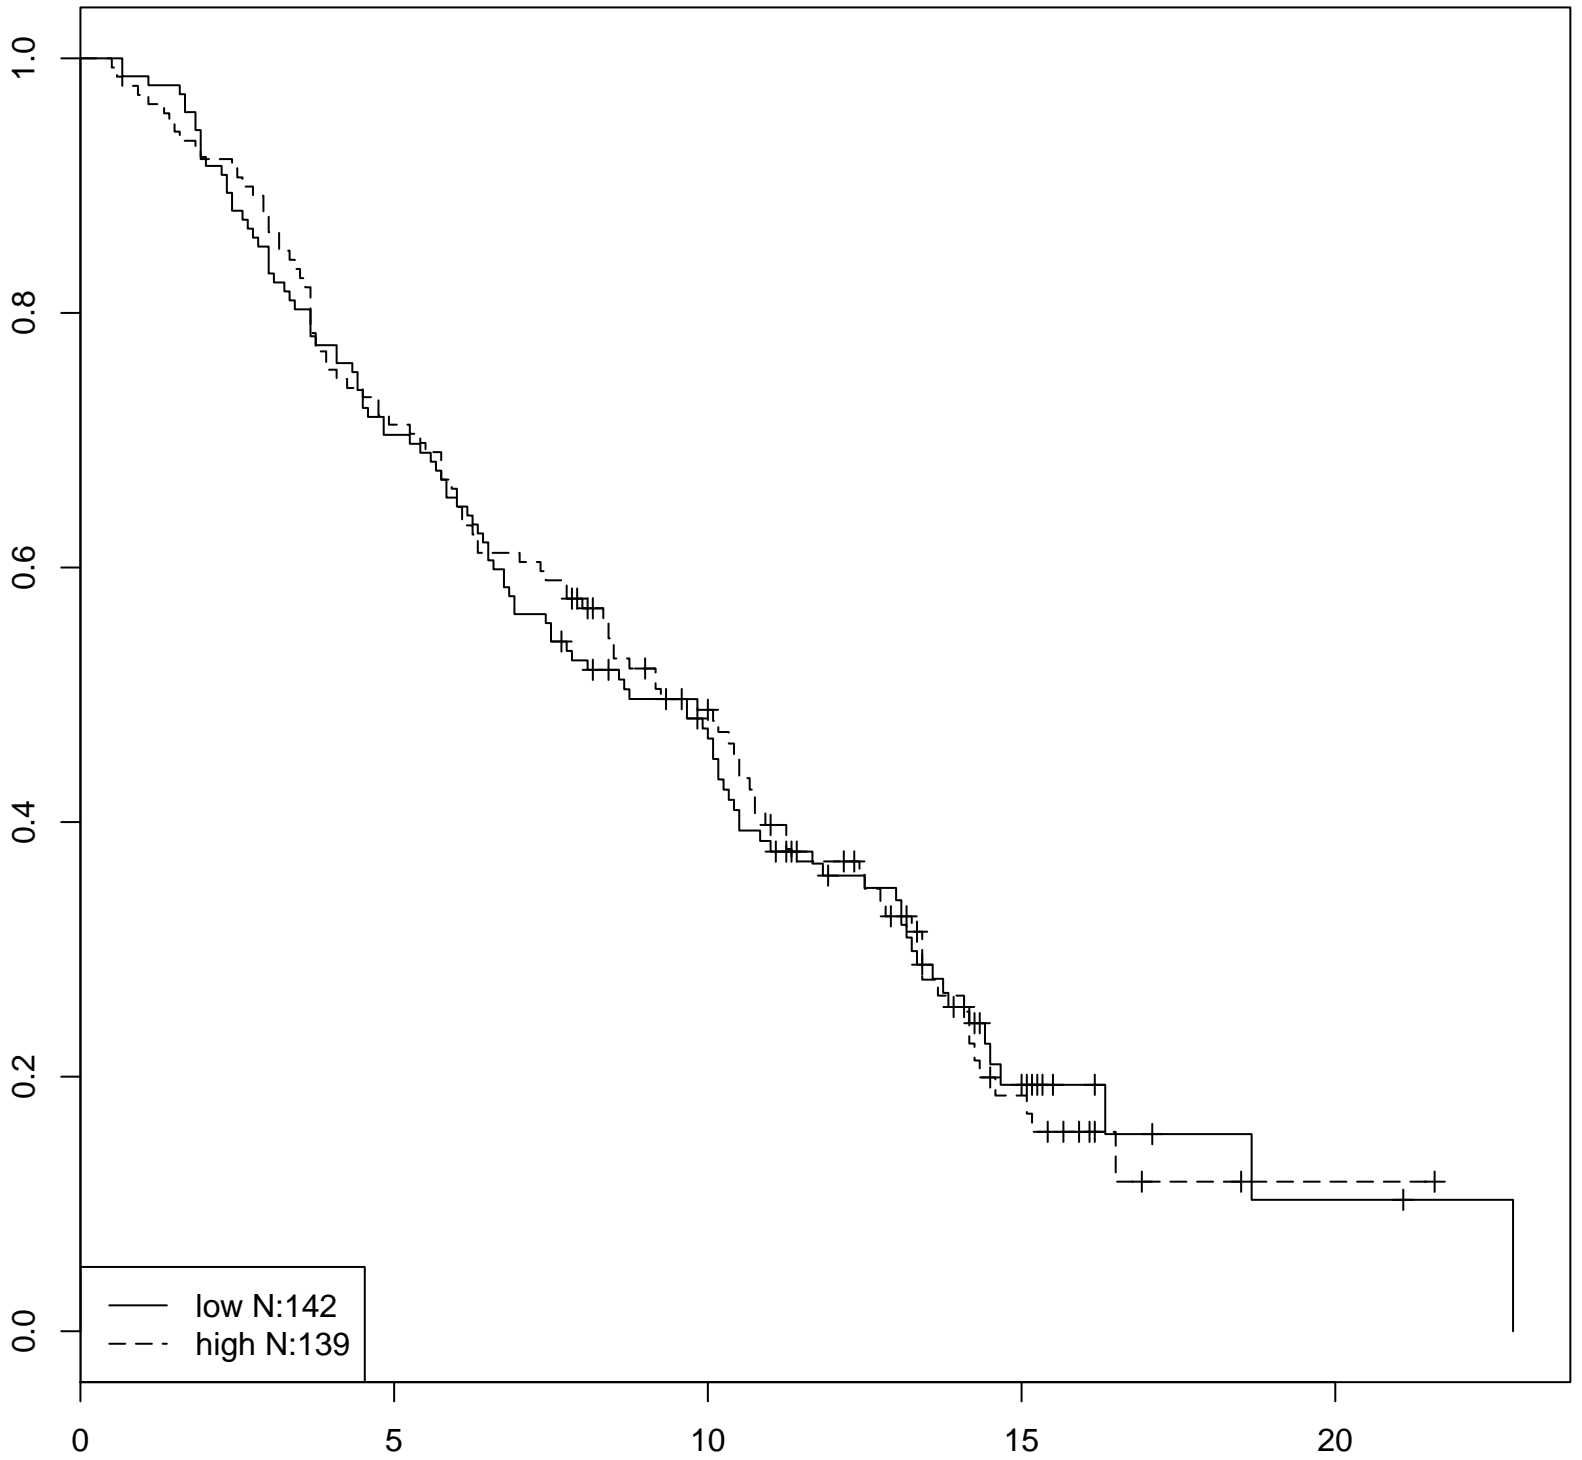

years

log-rank test p-value = 0.978

# Survival by IL6R expression

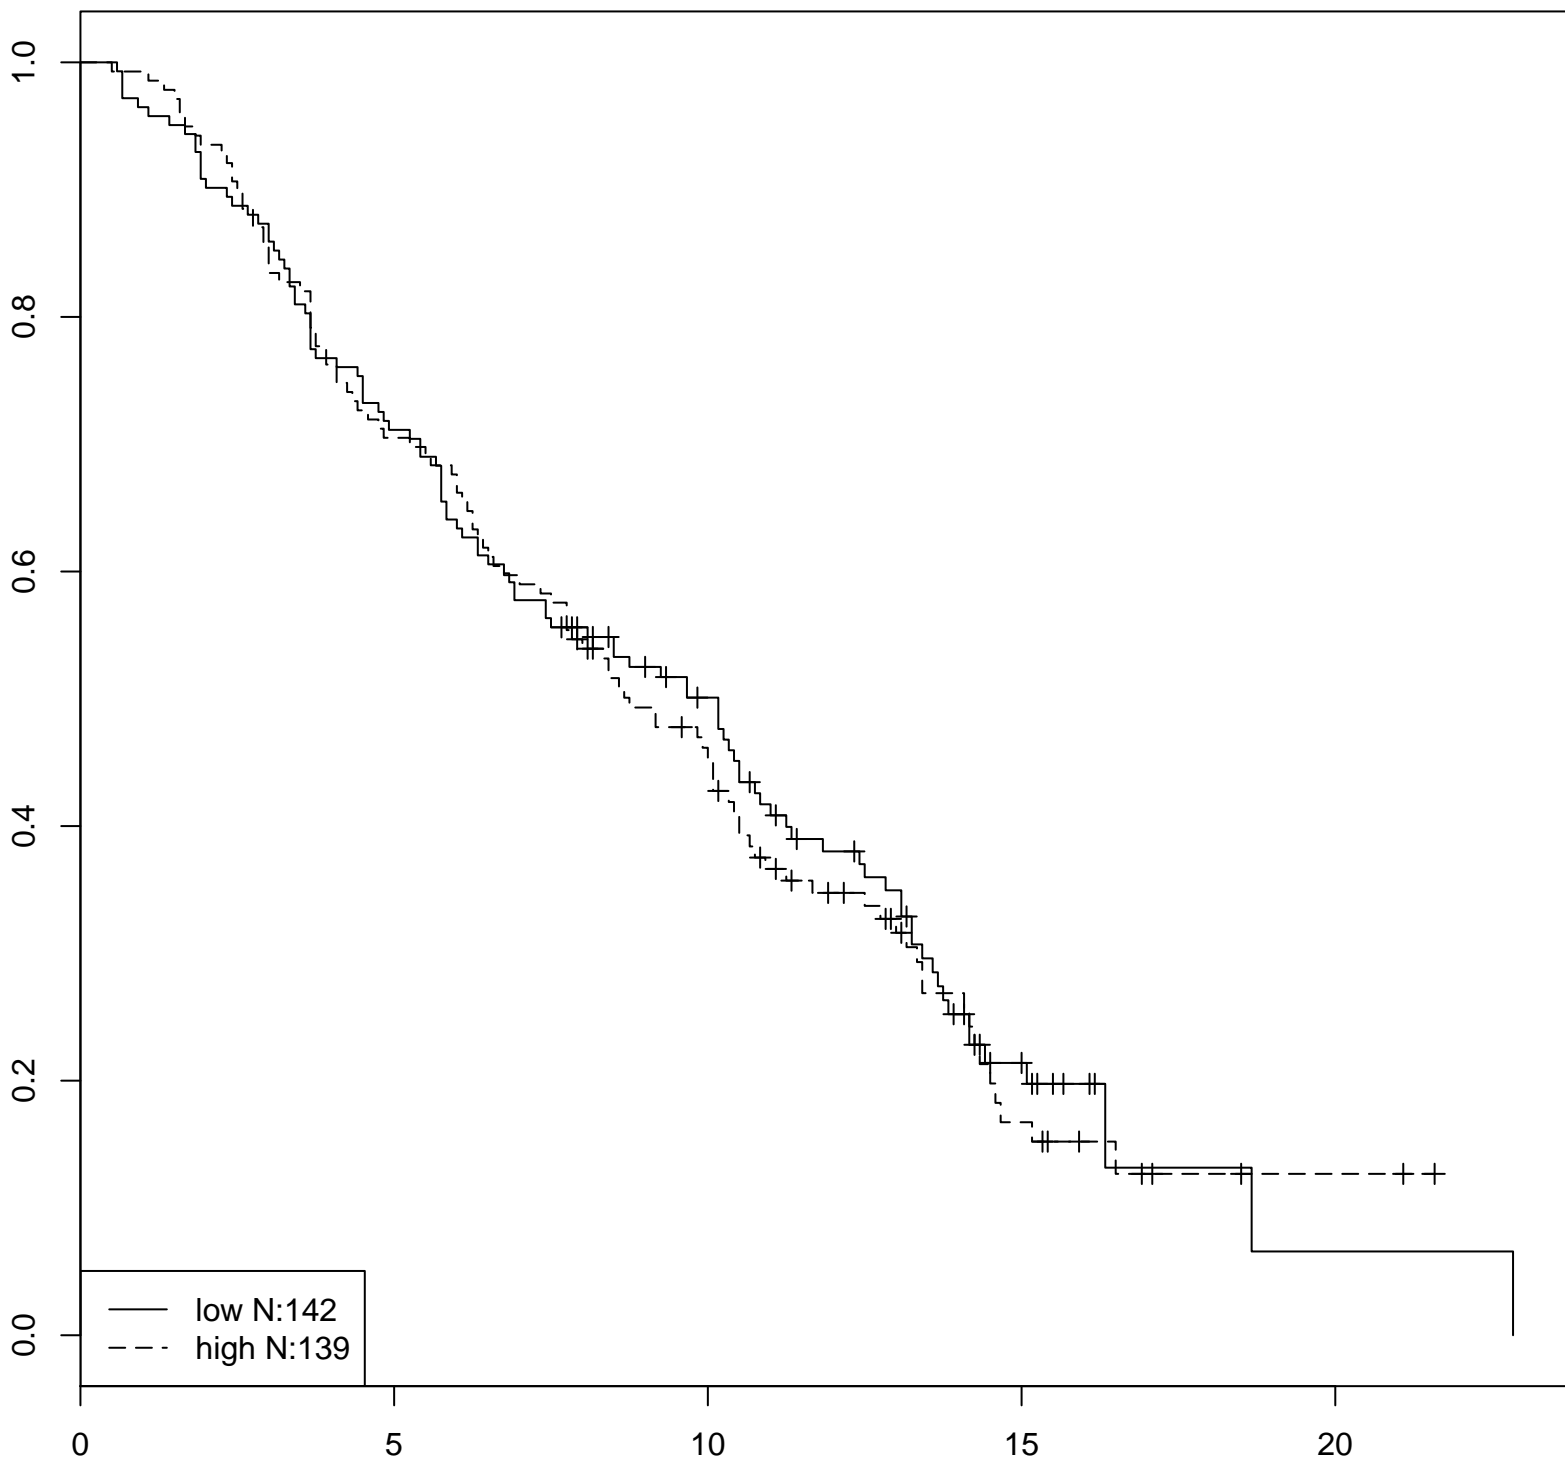

years

log-rank test p-value = 0.732

# Survival by IL8 expression

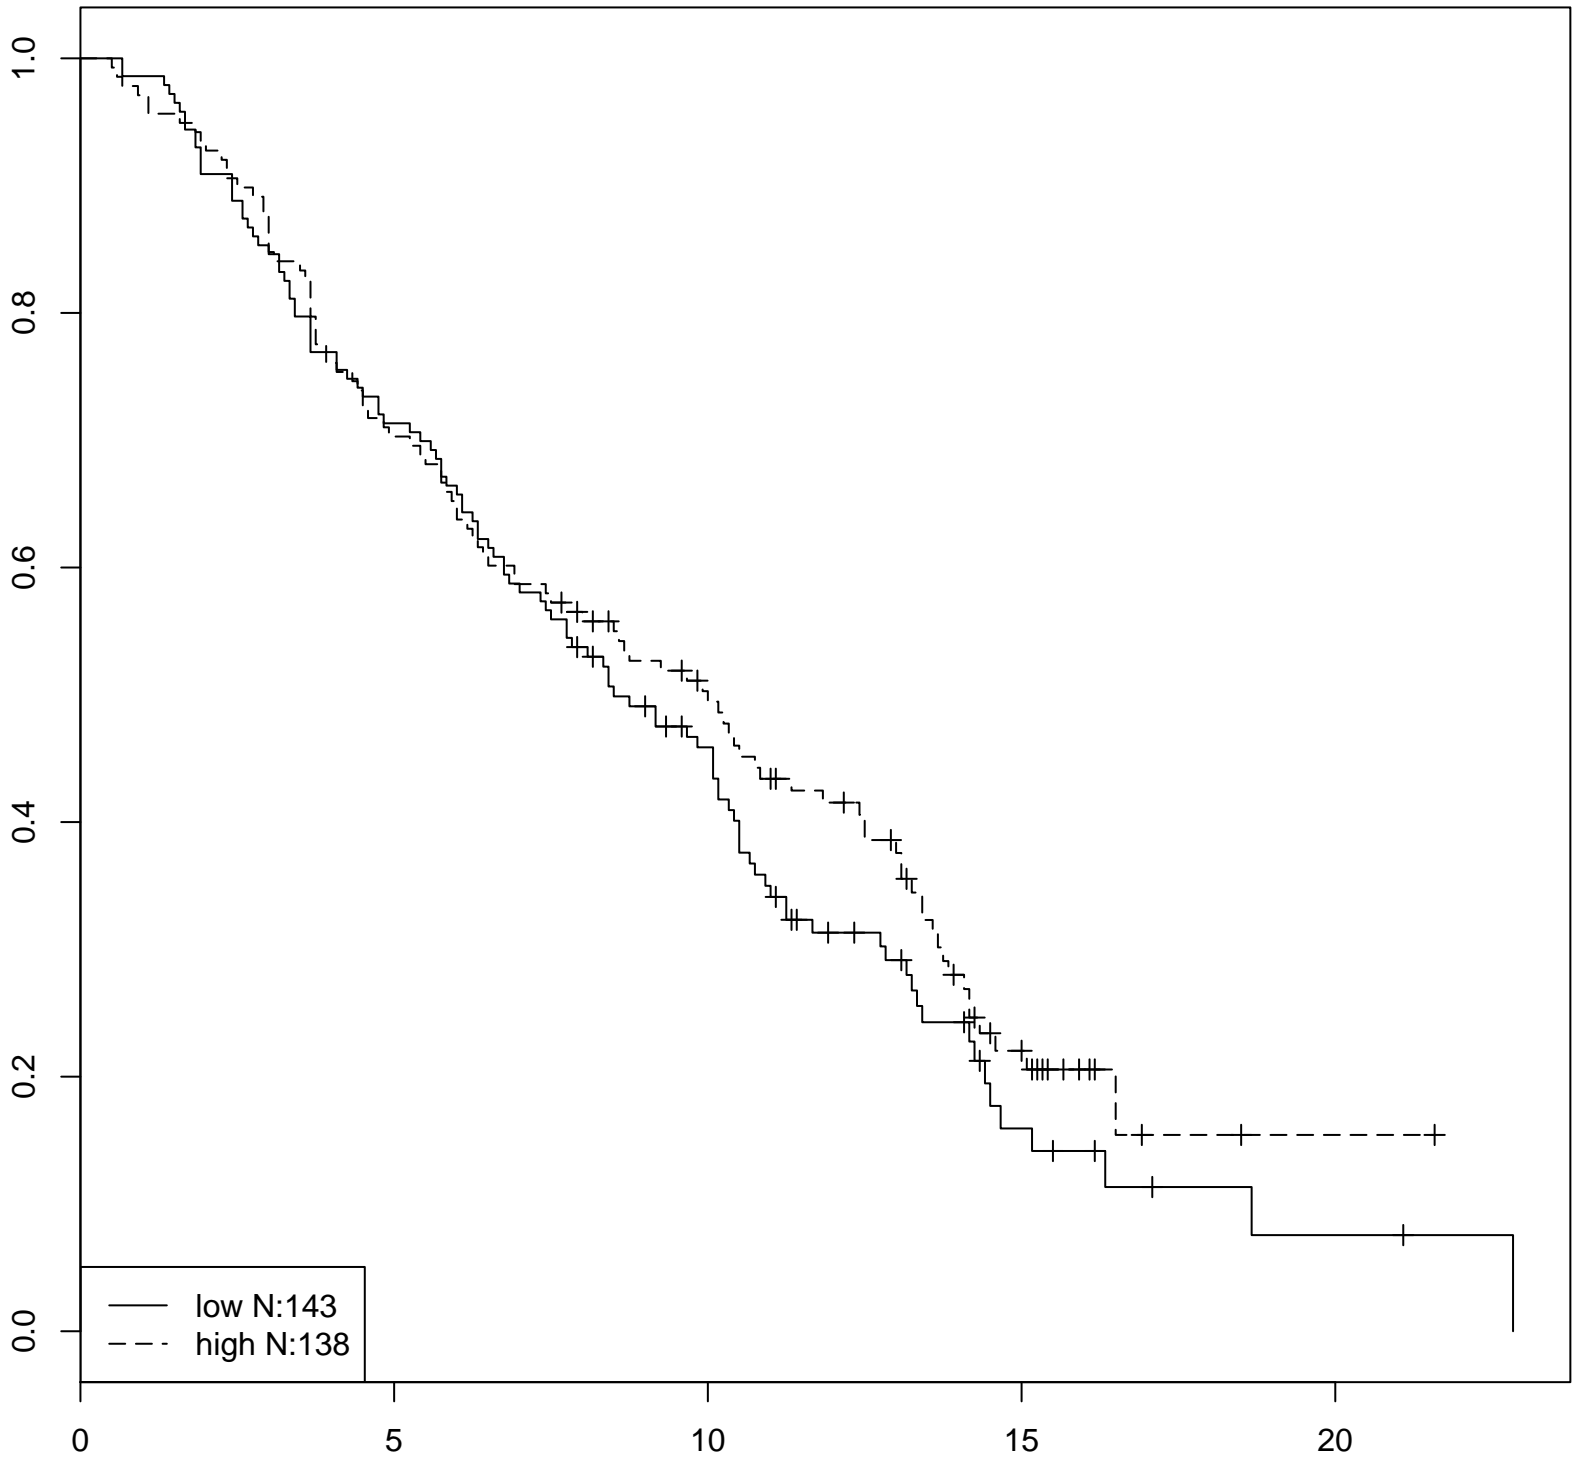

# Survival by ILK expression

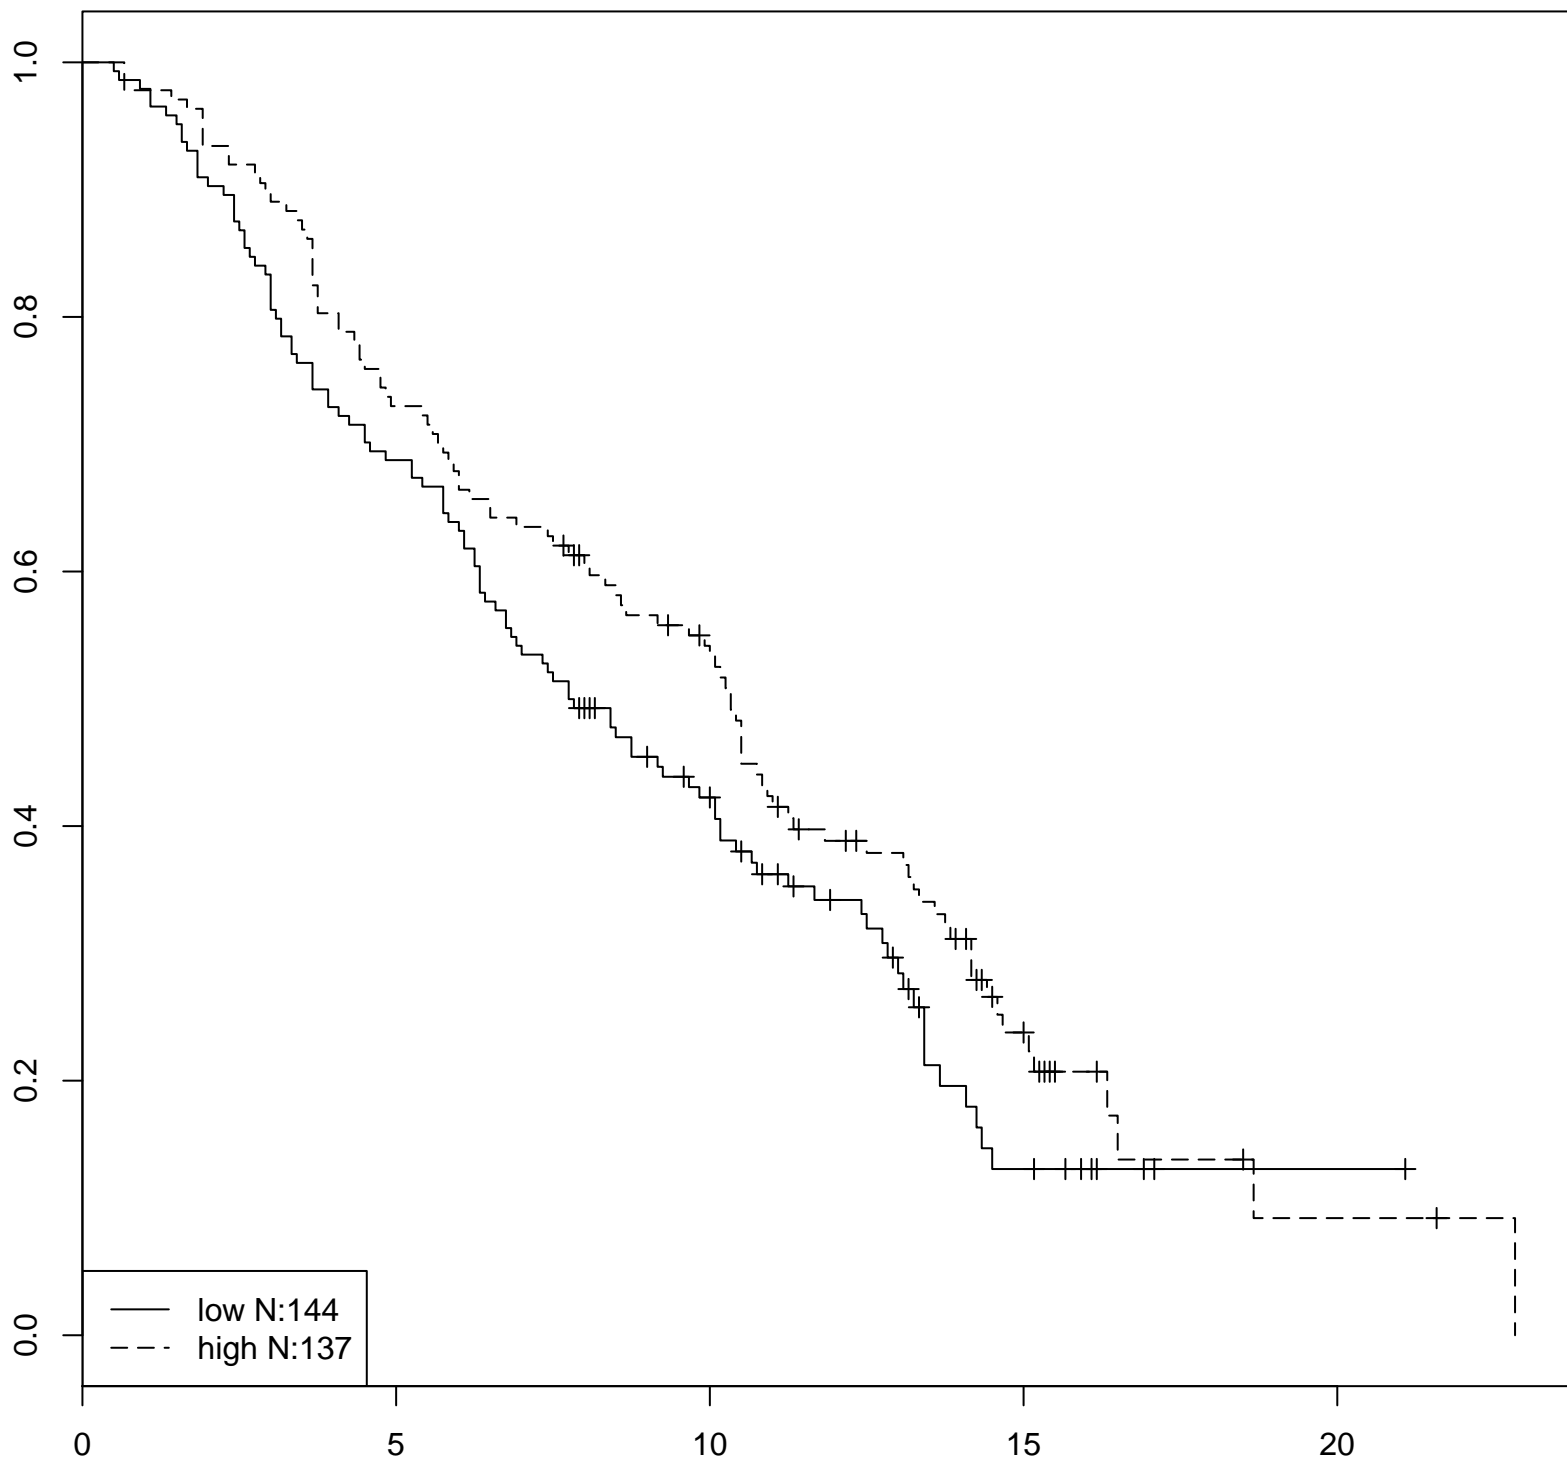

years

log-rank test p-value = 0.066

# Survival by ITGA2B expression

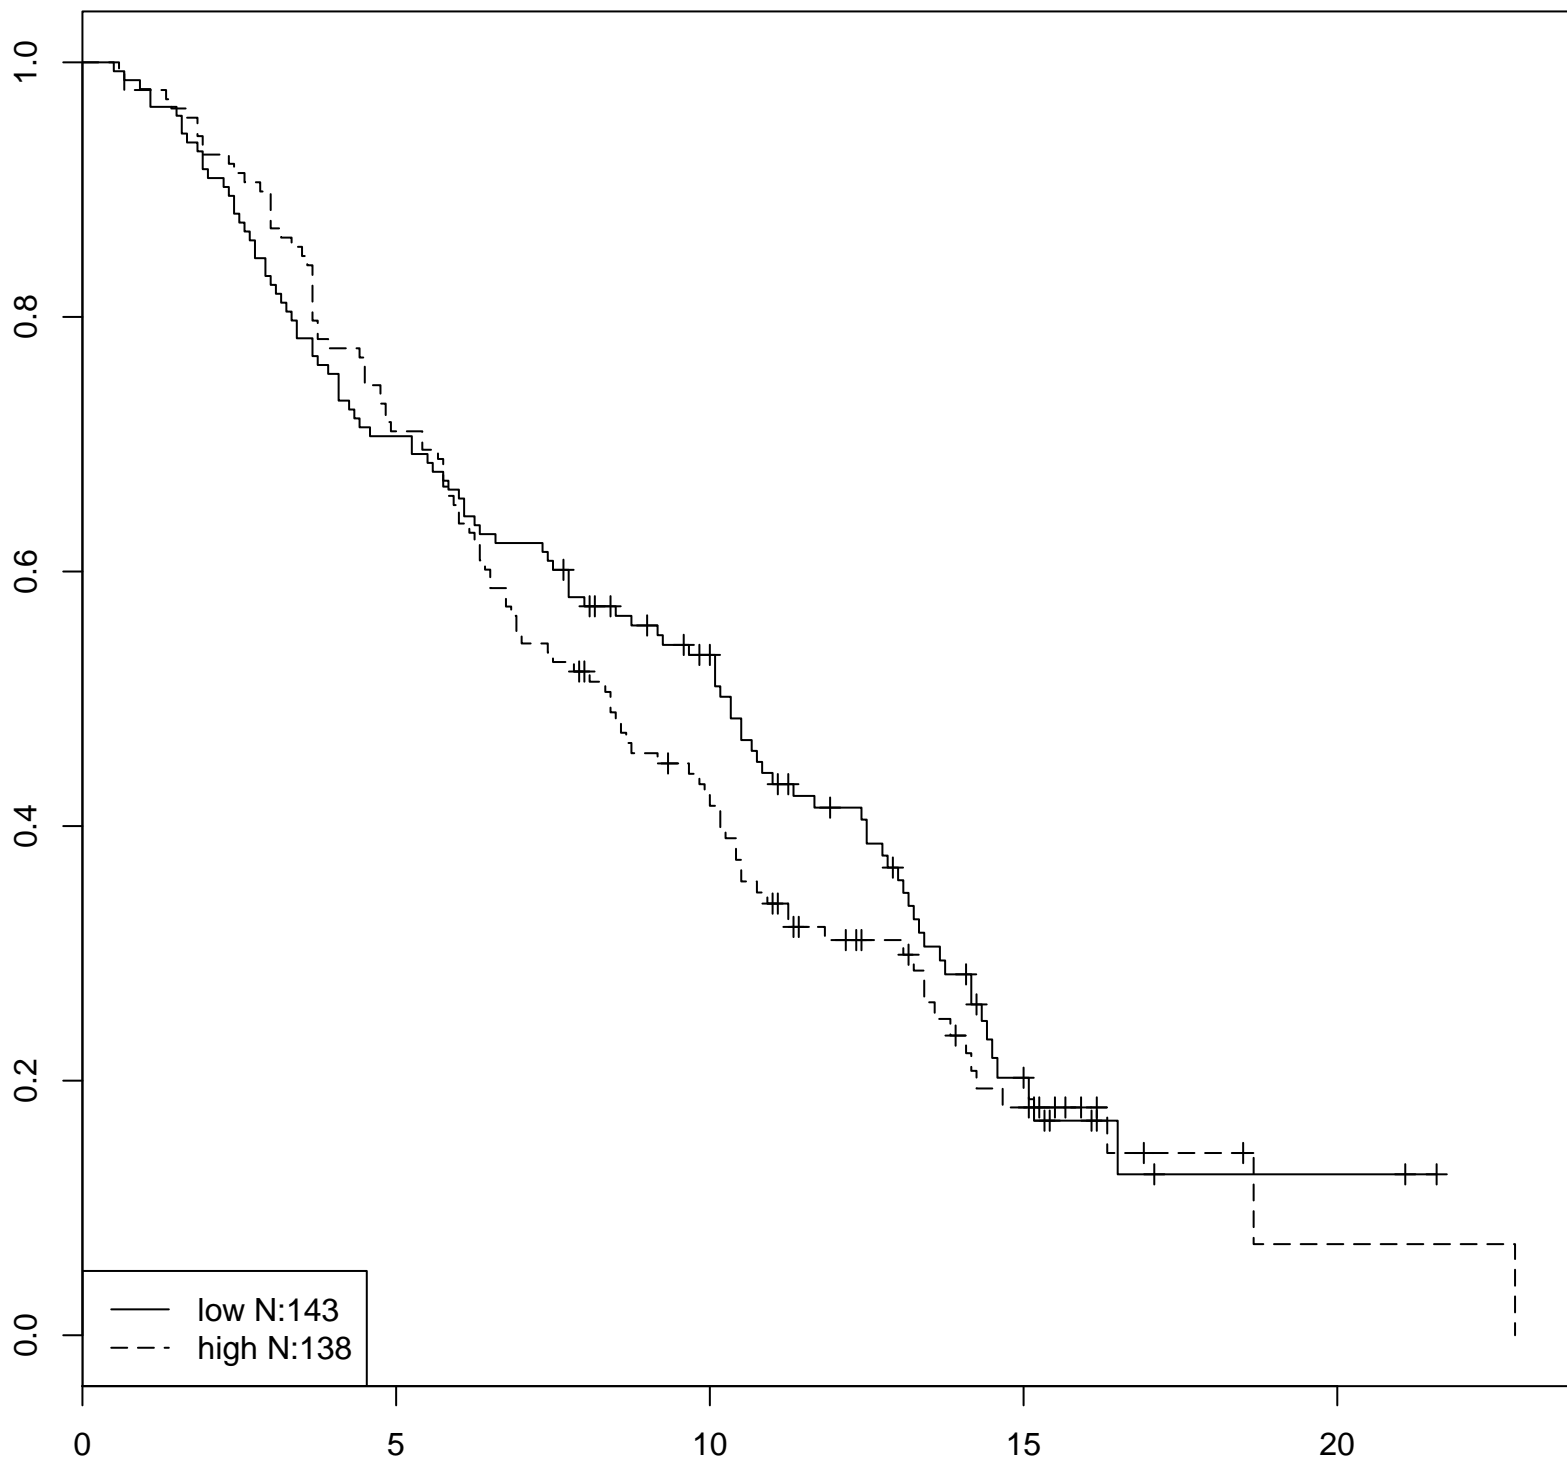

# Survival by ITGA3 expression

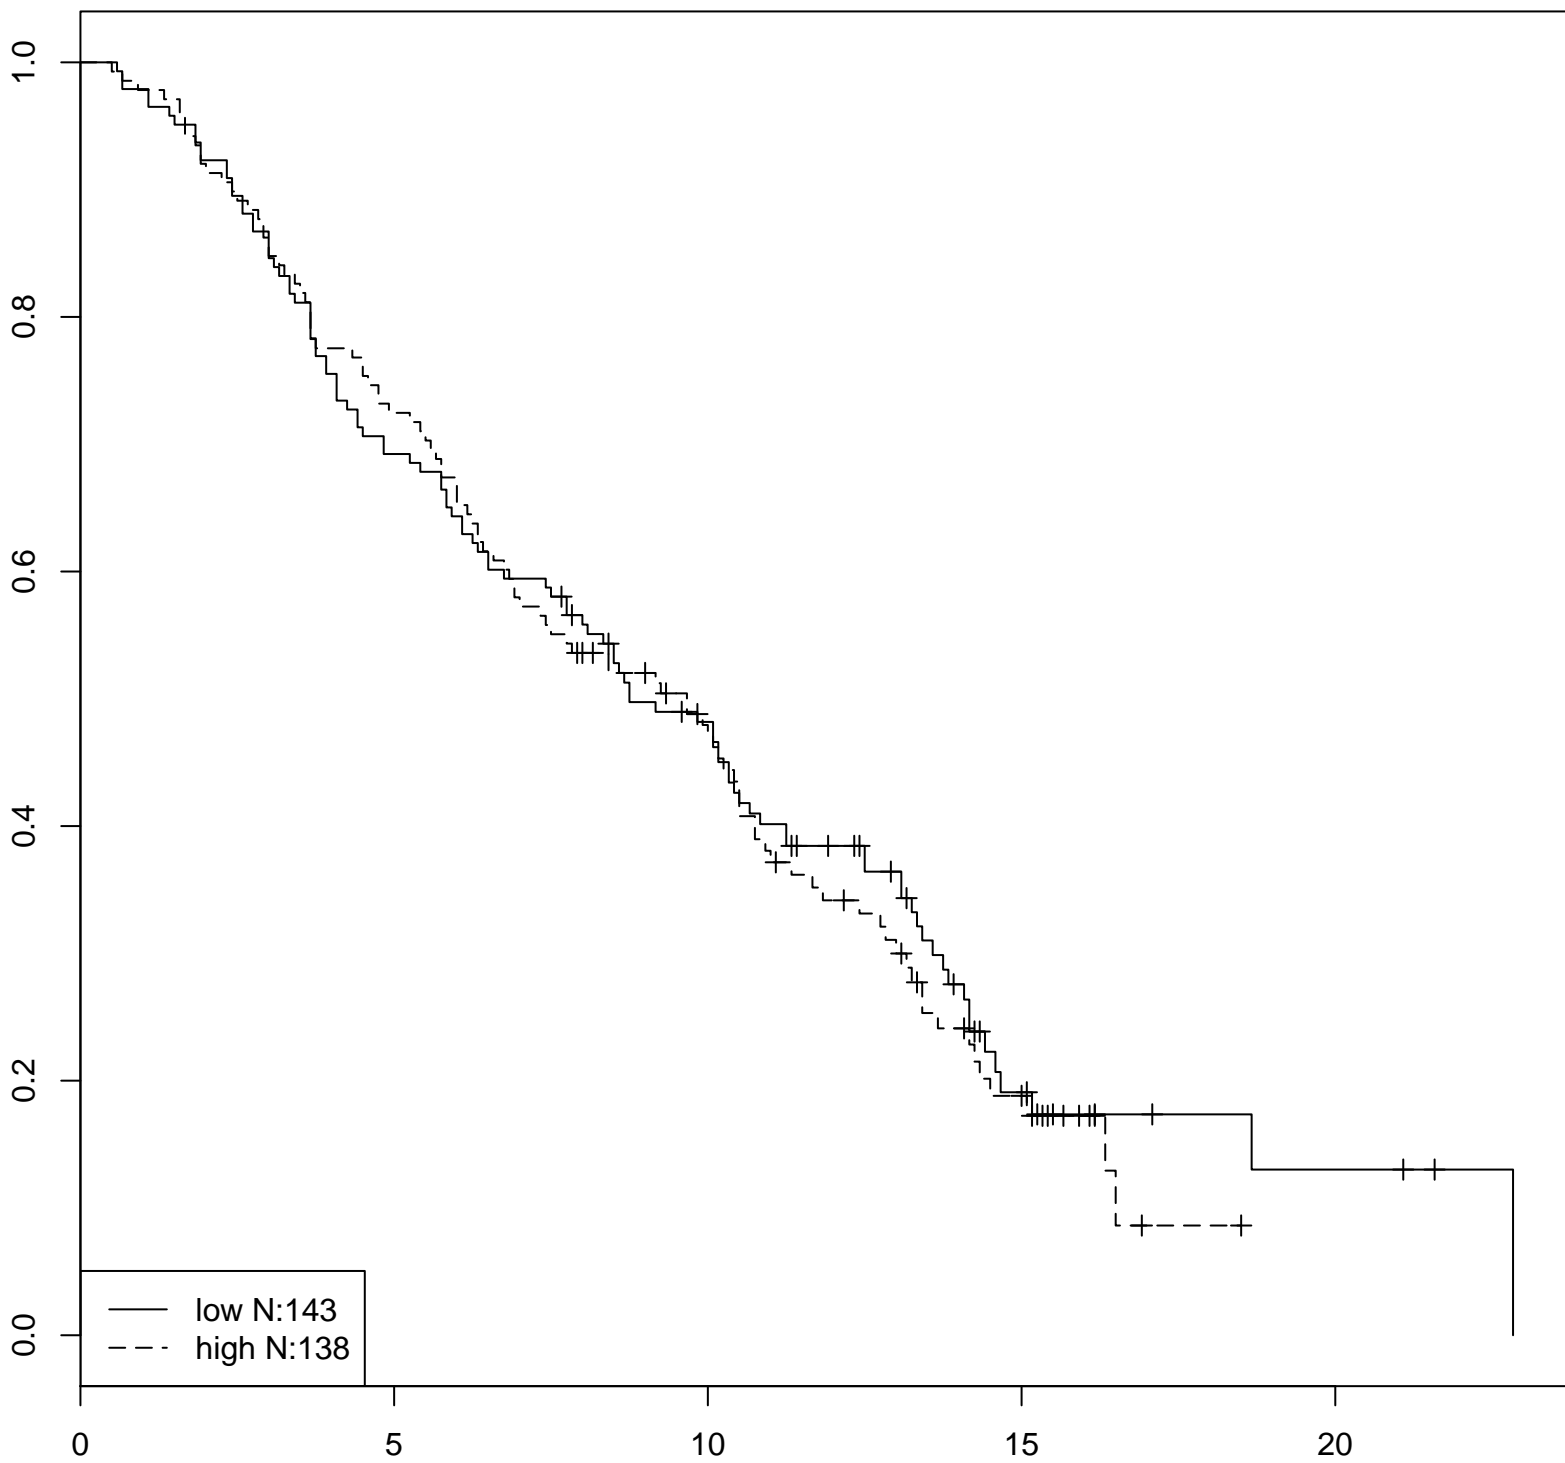

years

log-rank test p-value = 0.666



# Survival by KCNMA1 expression

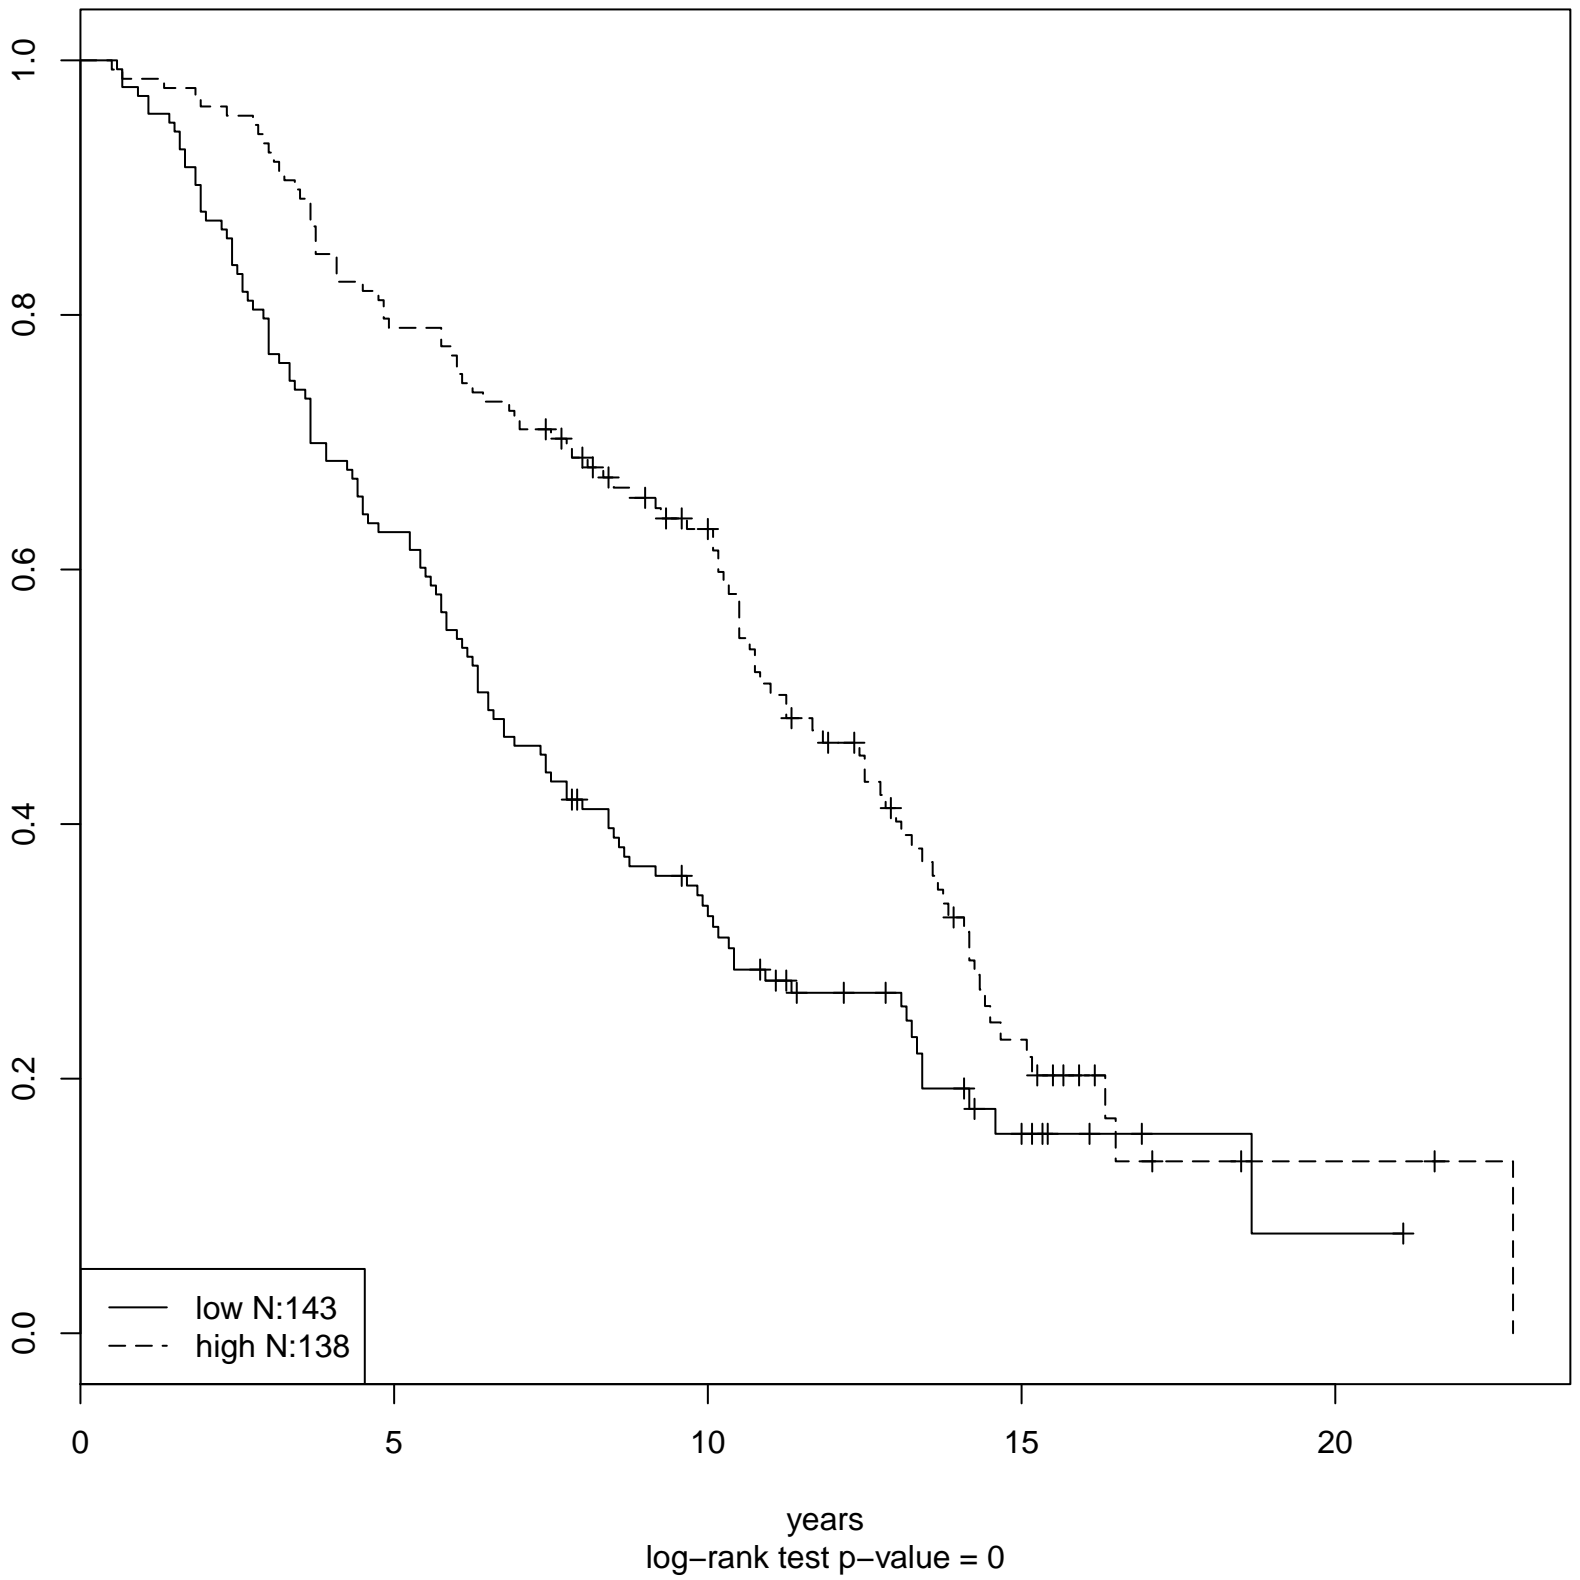

# Survival by KLF6 expression

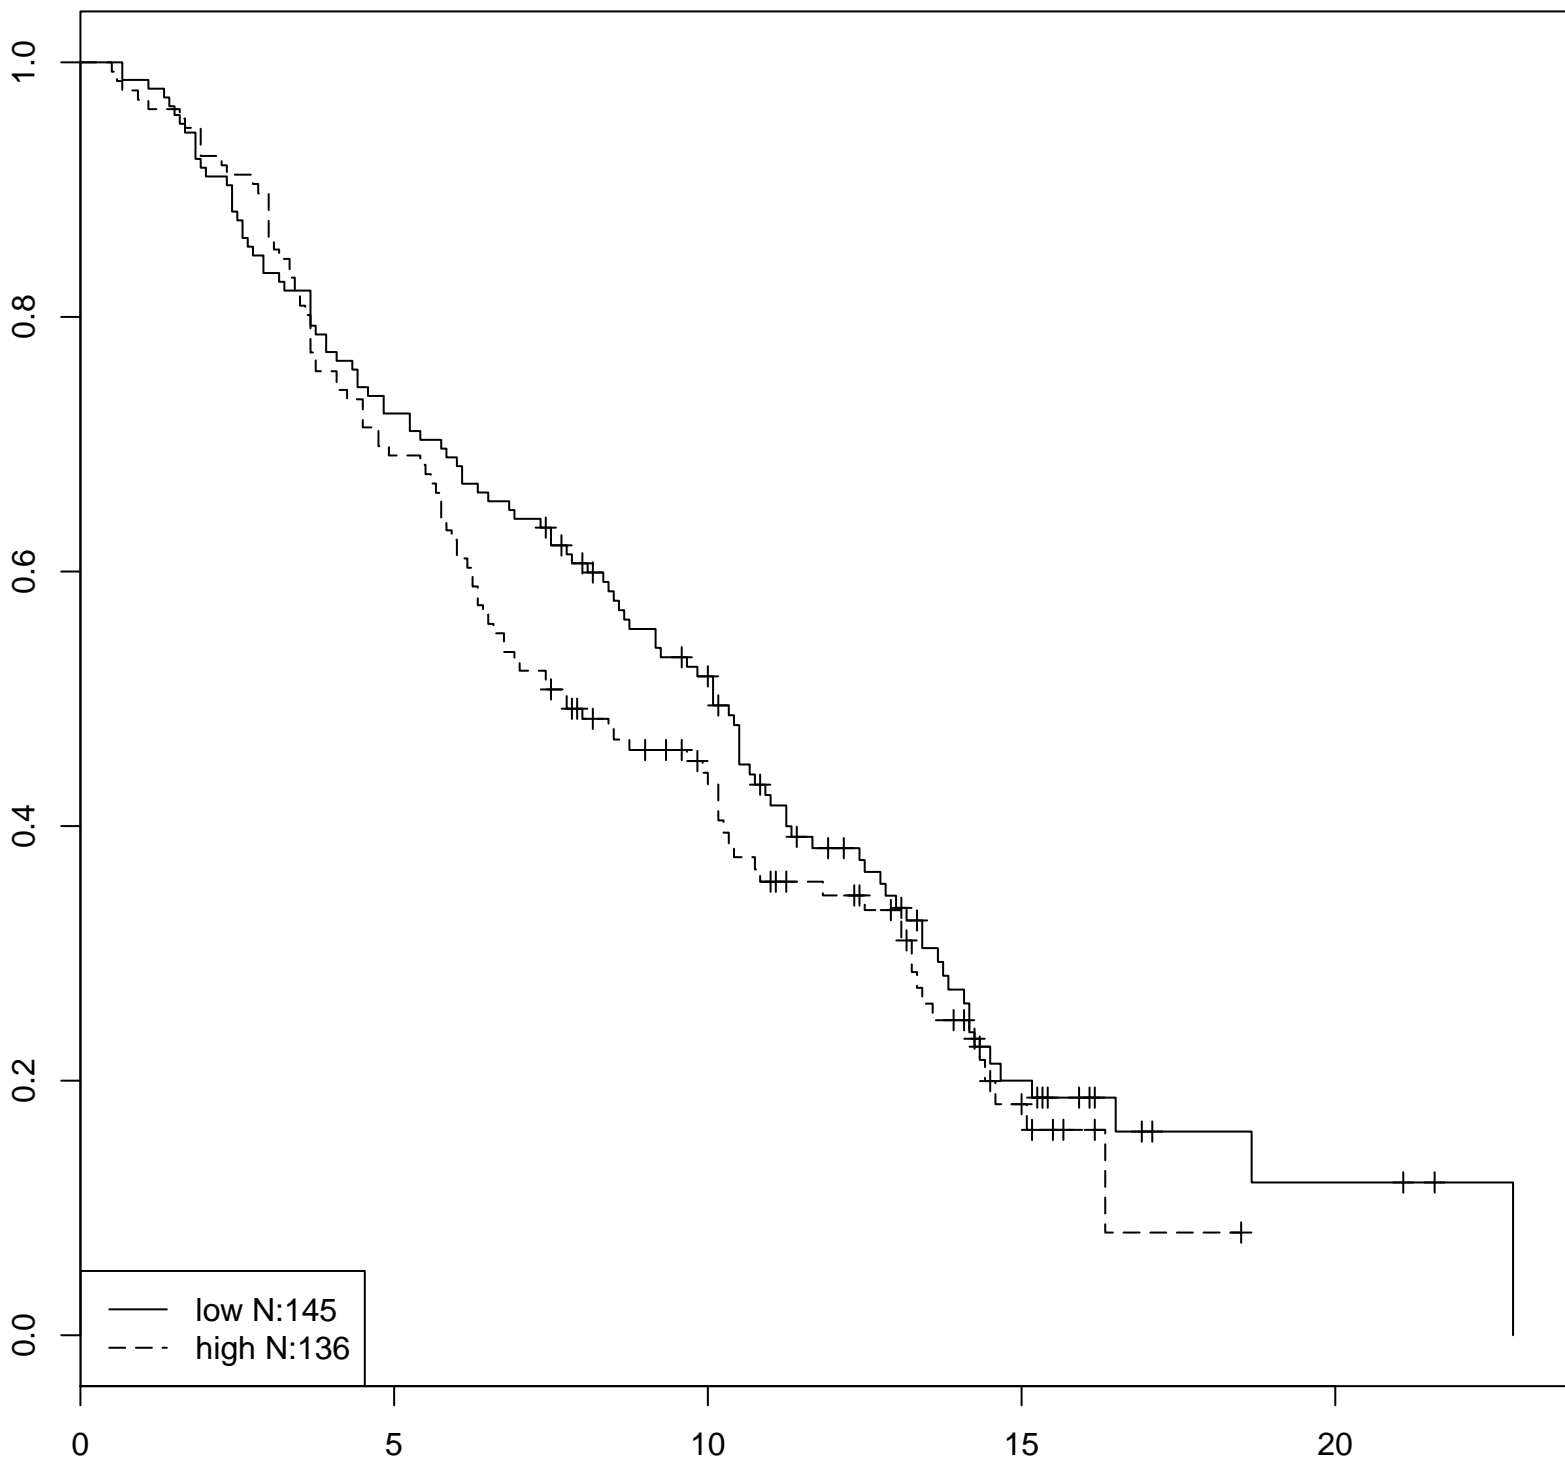

years

log-rank test p-value = 0.292

# Survival by KLK1 expression

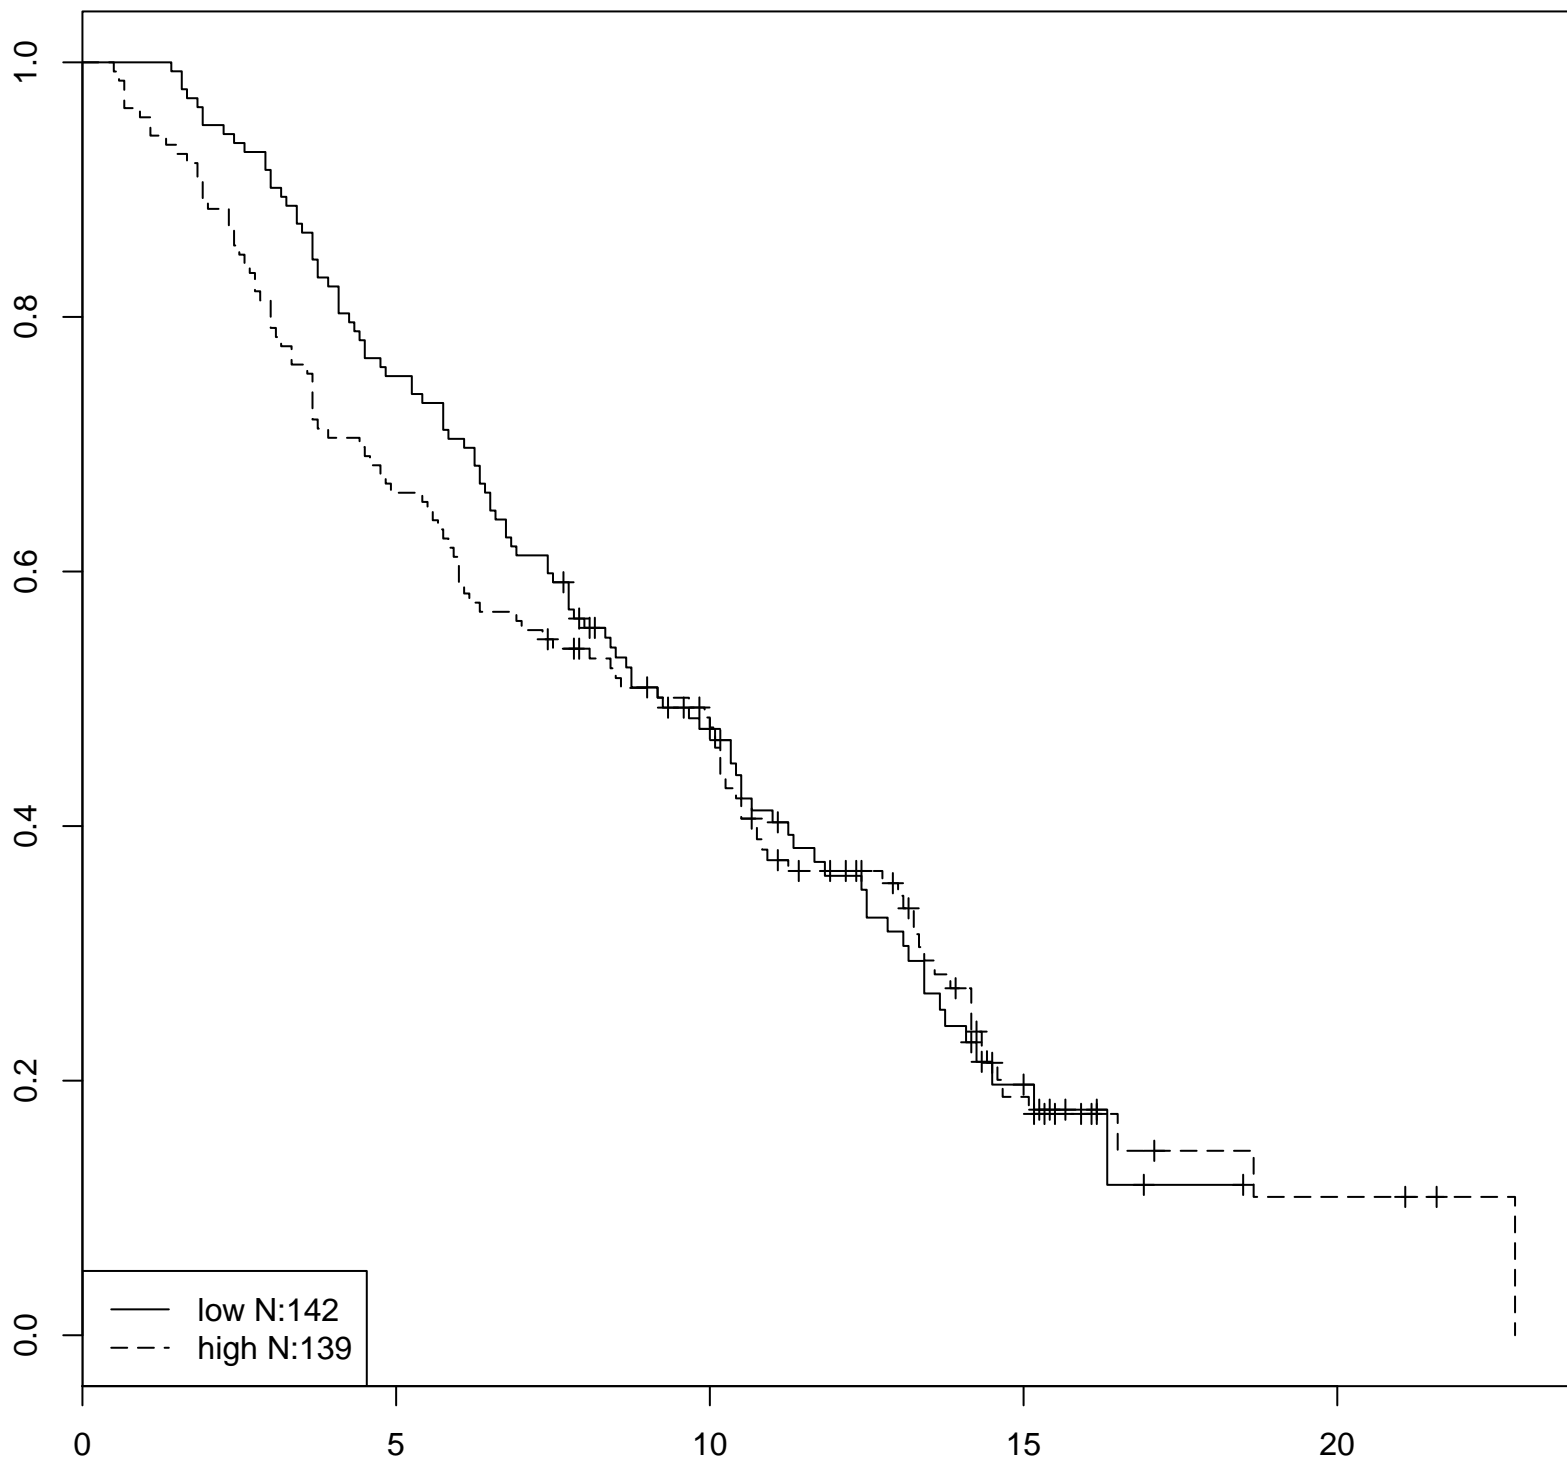

years  
log-rank test p-value = 0.682

# Survival by KLK10 expression

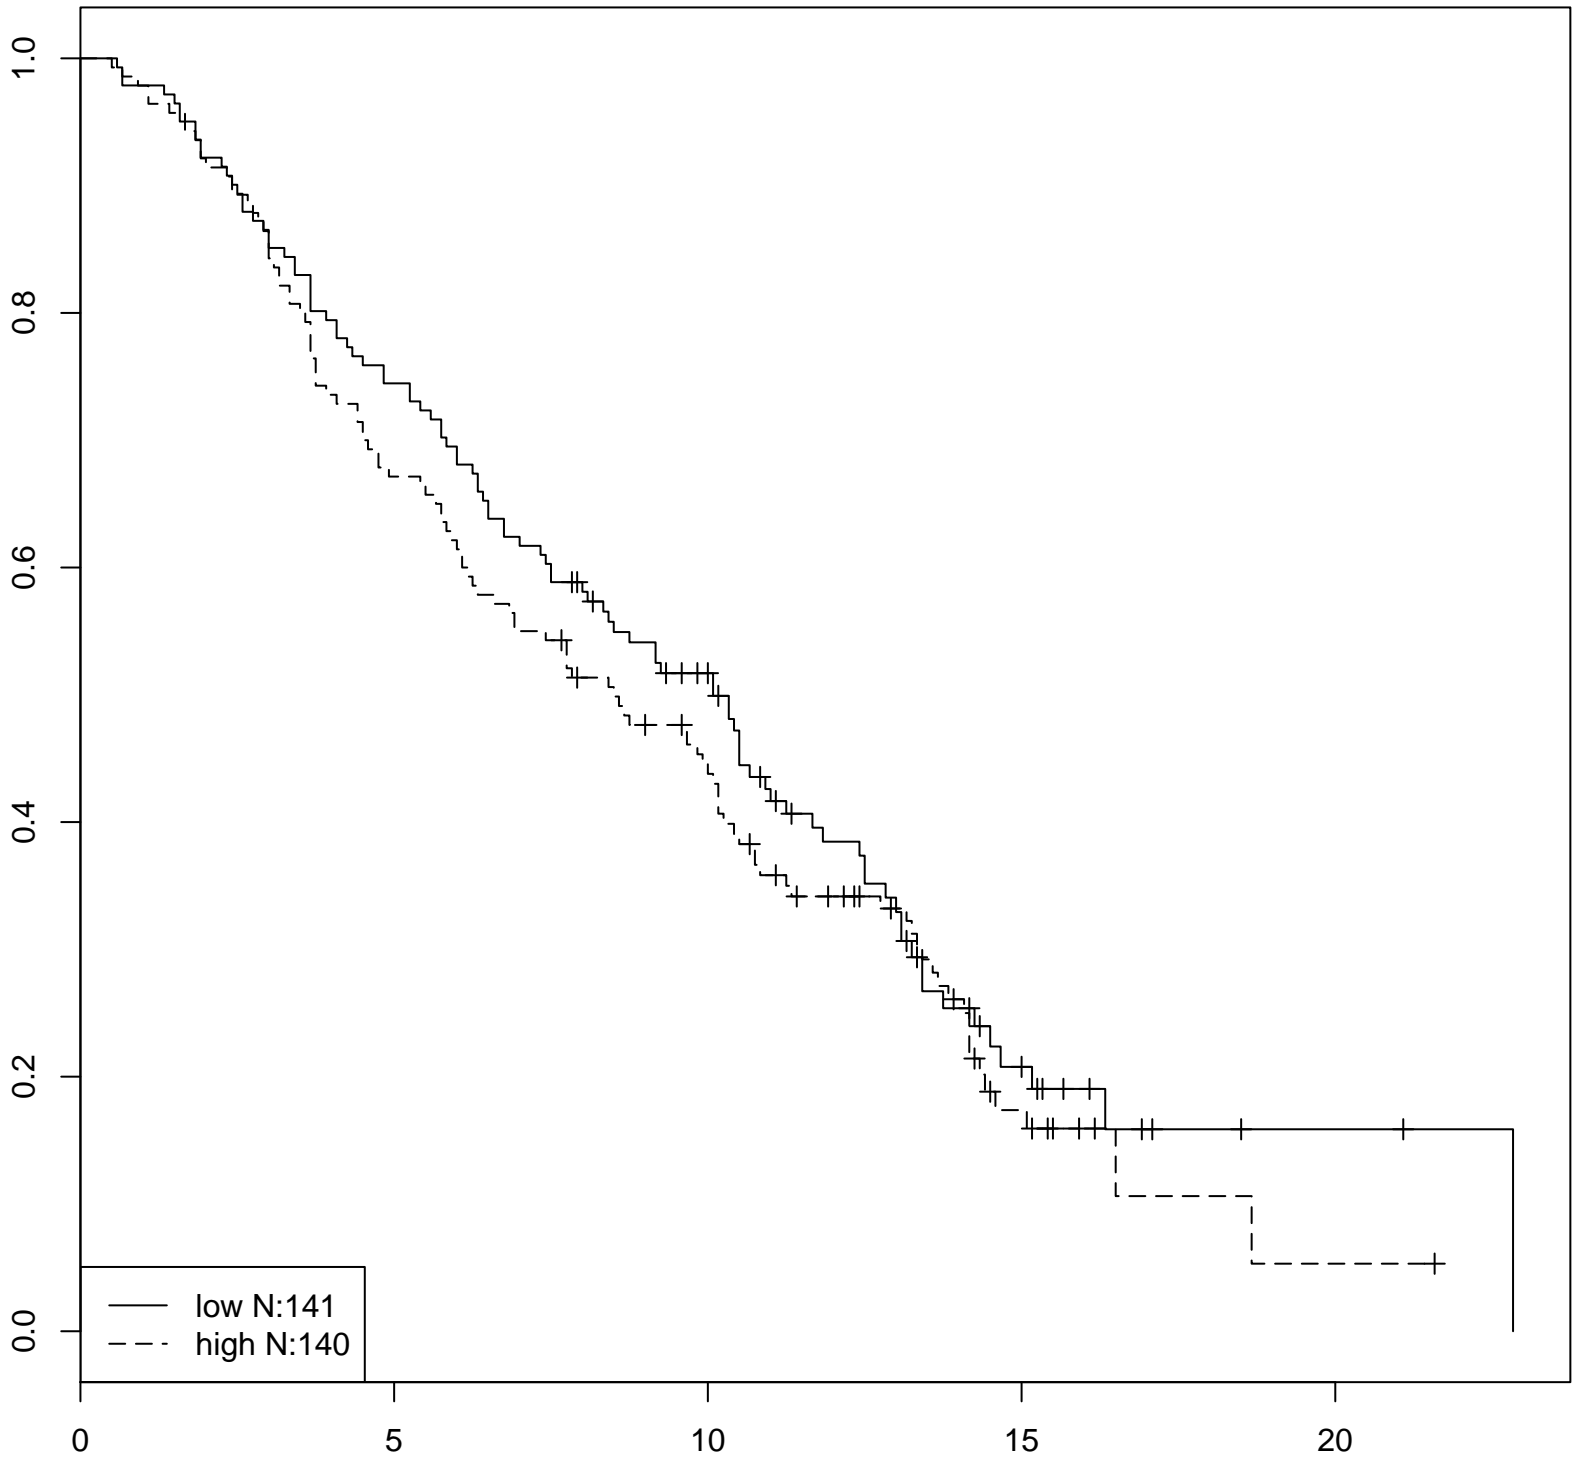

years

log-rank test p-value = 0.324

# Survival by KLK11 expression

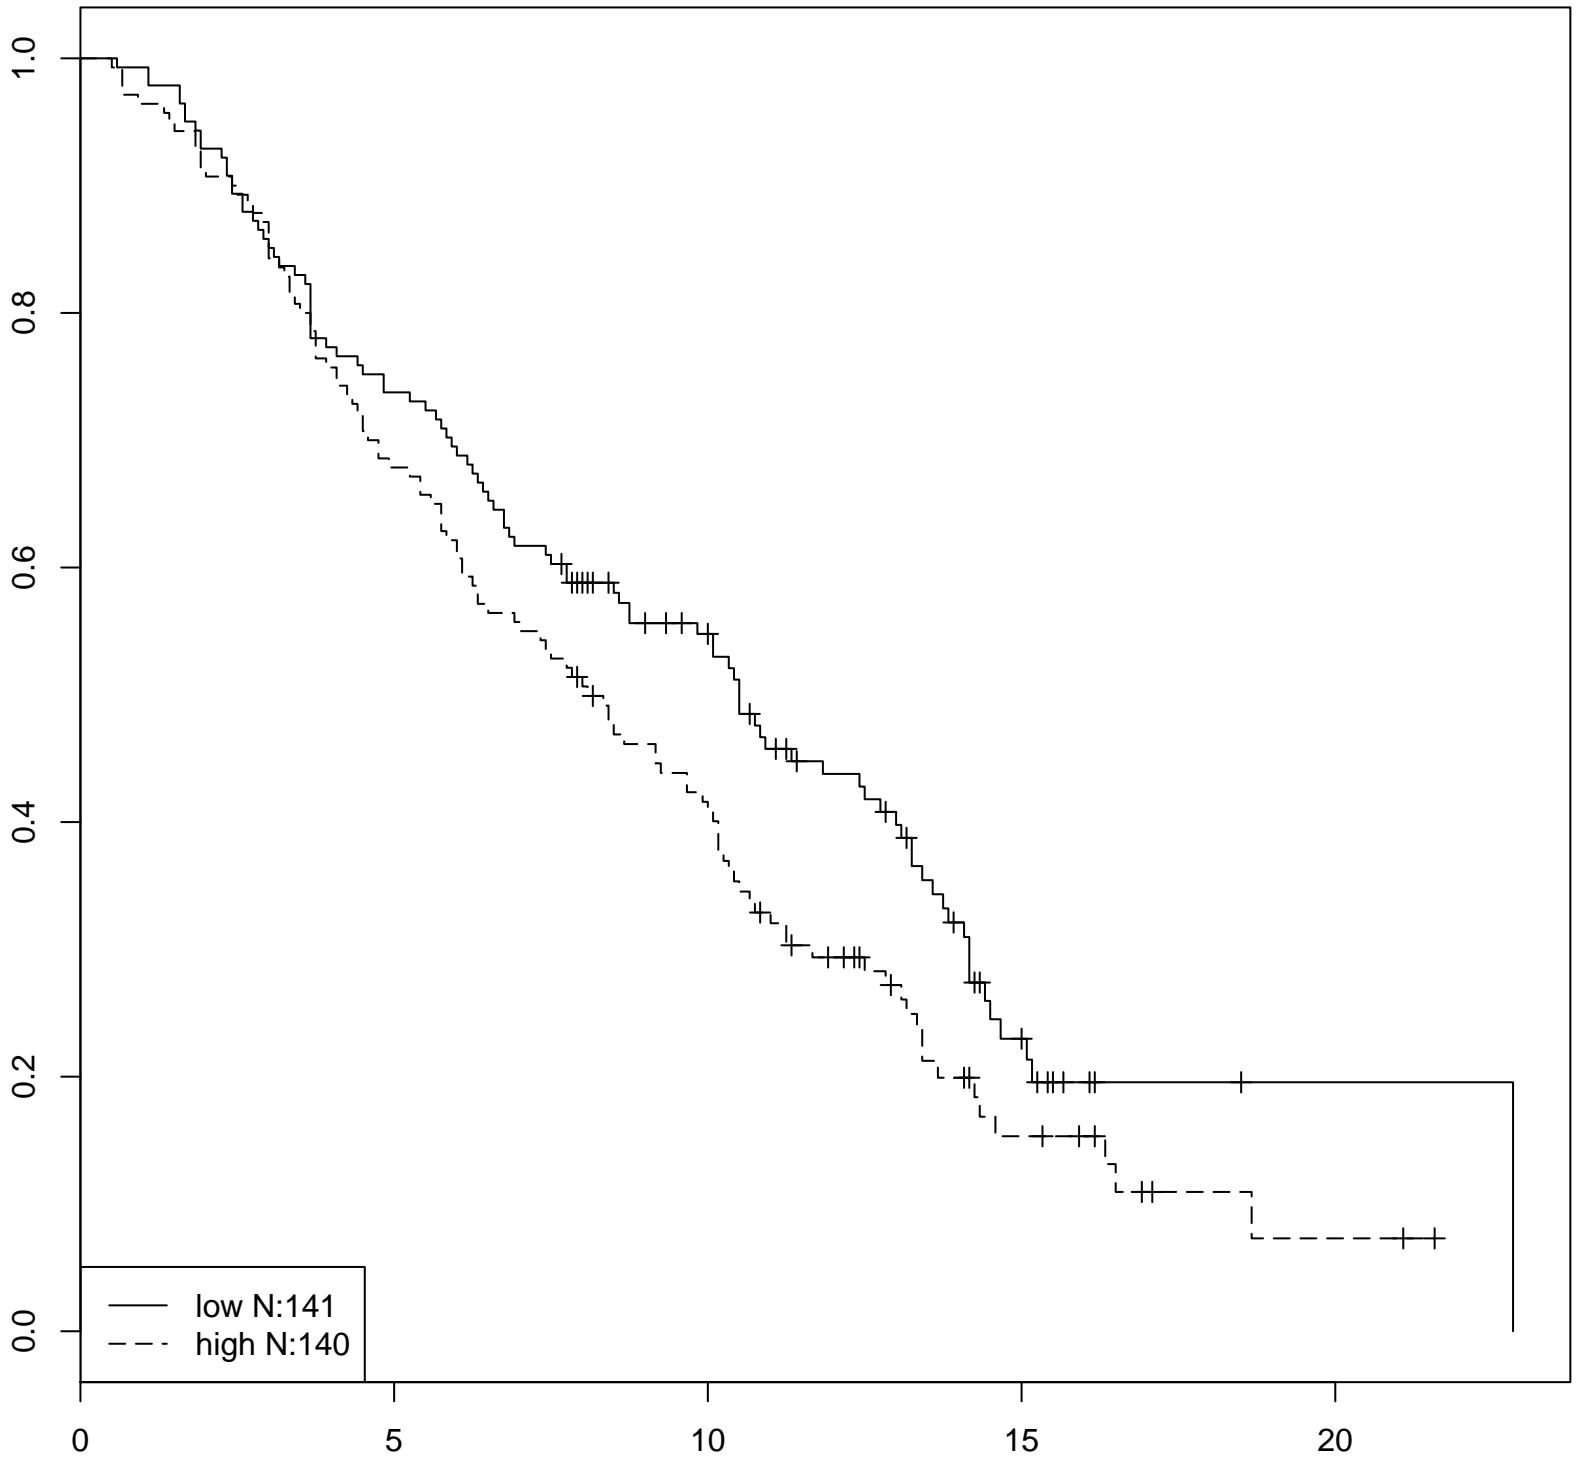

years  
log-rank test p-value = 0.037

# Survival by KLK2 expression

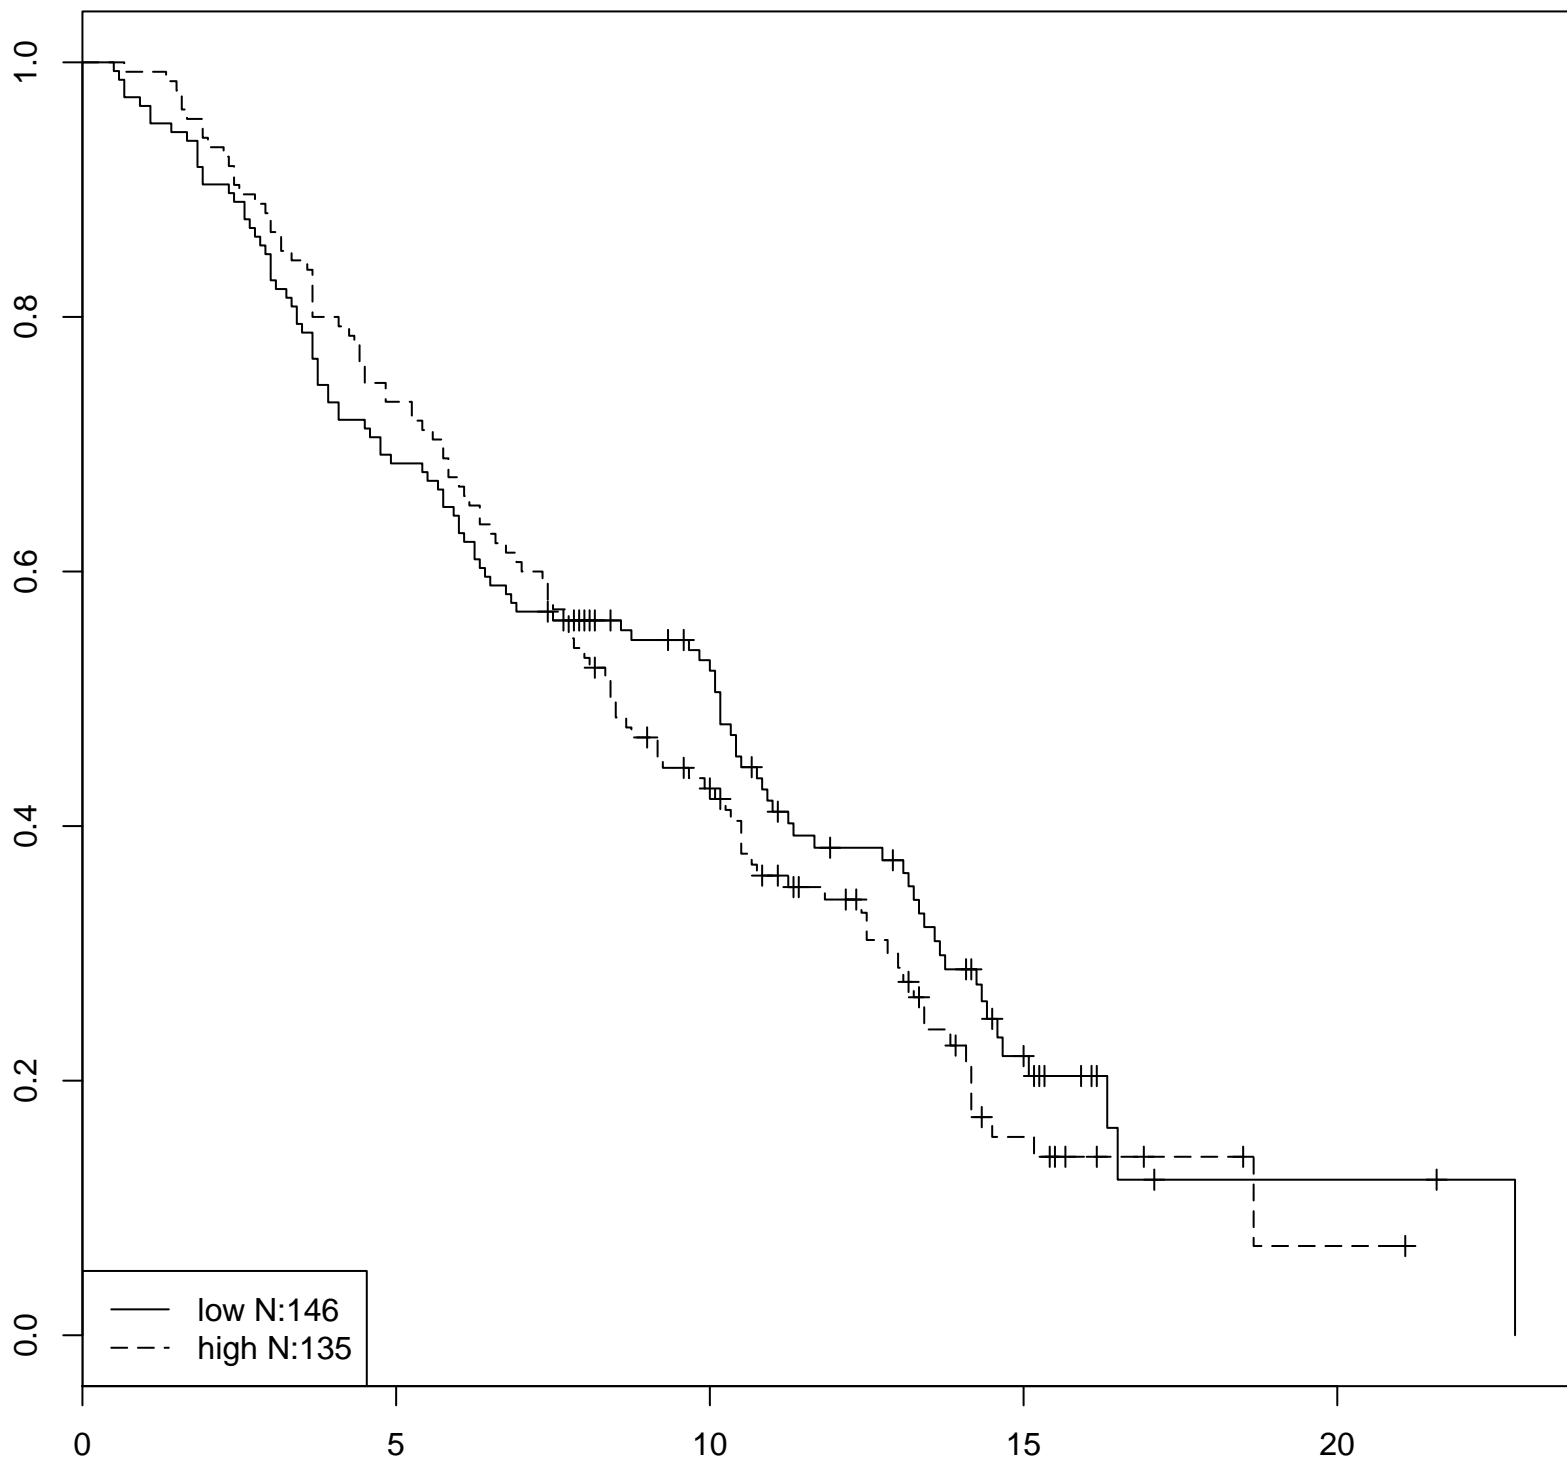

years

log-rank test p-value = 0.374

# Survival by KLK3 expression

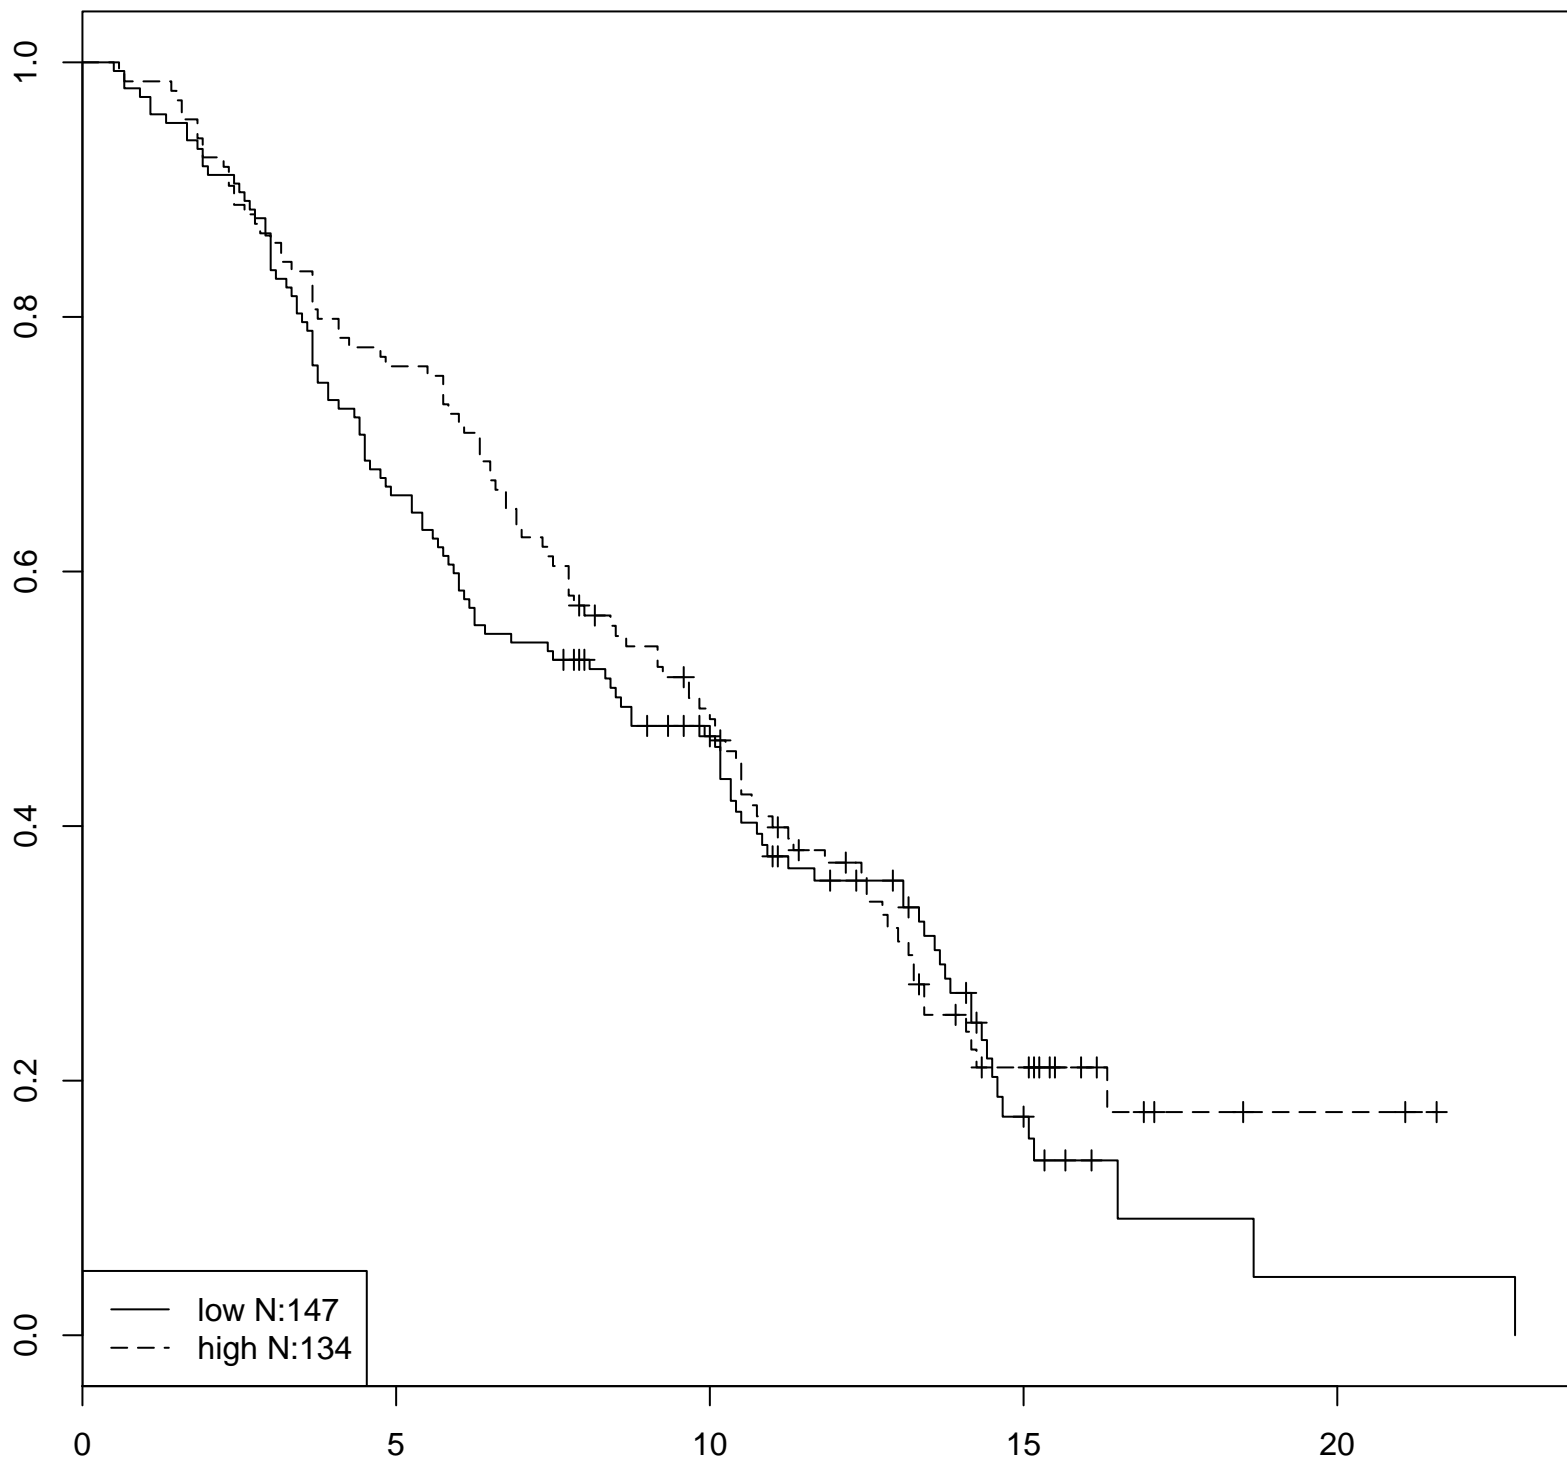

years

log-rank test p-value = 0.392

# Survival by KLK4 expression

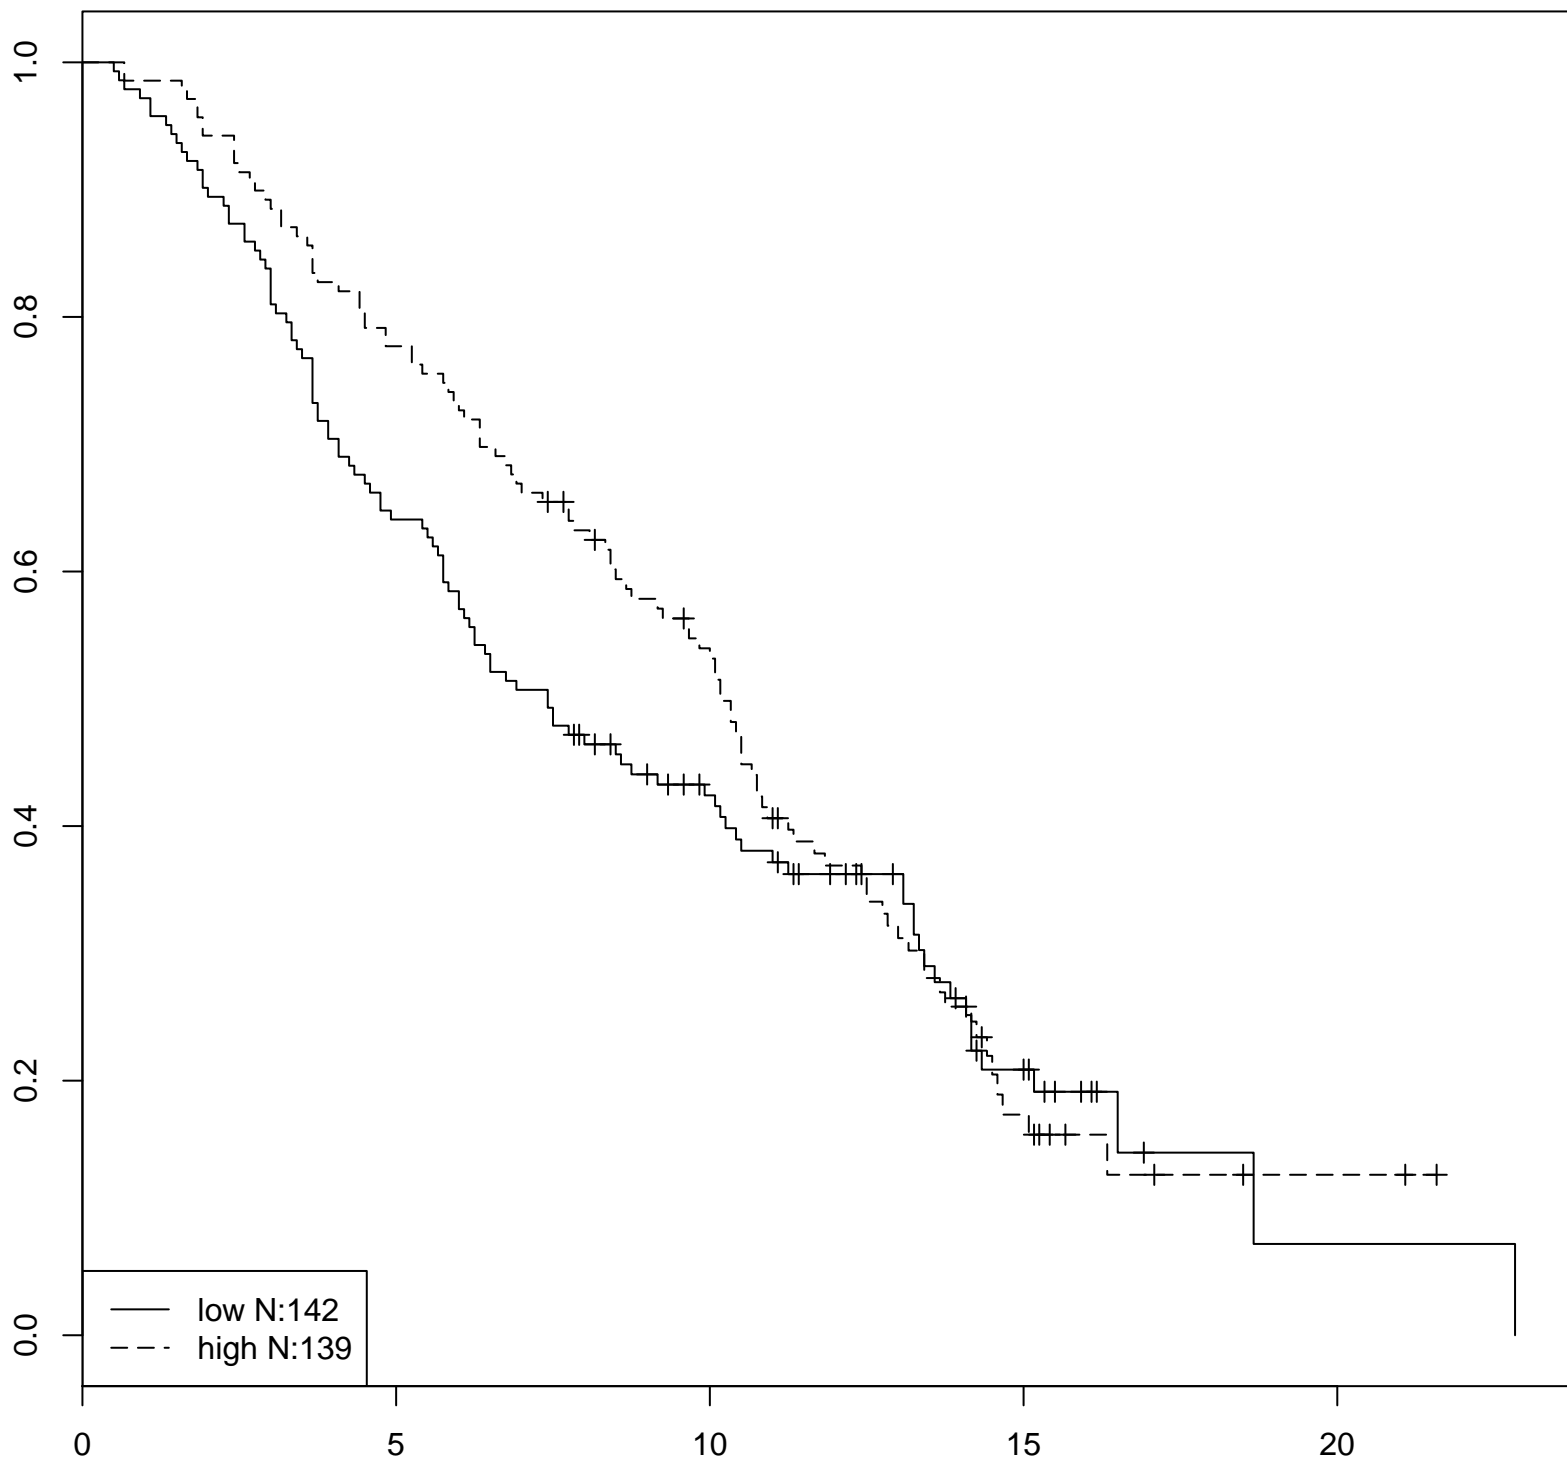



# Survival by KLK6 expression

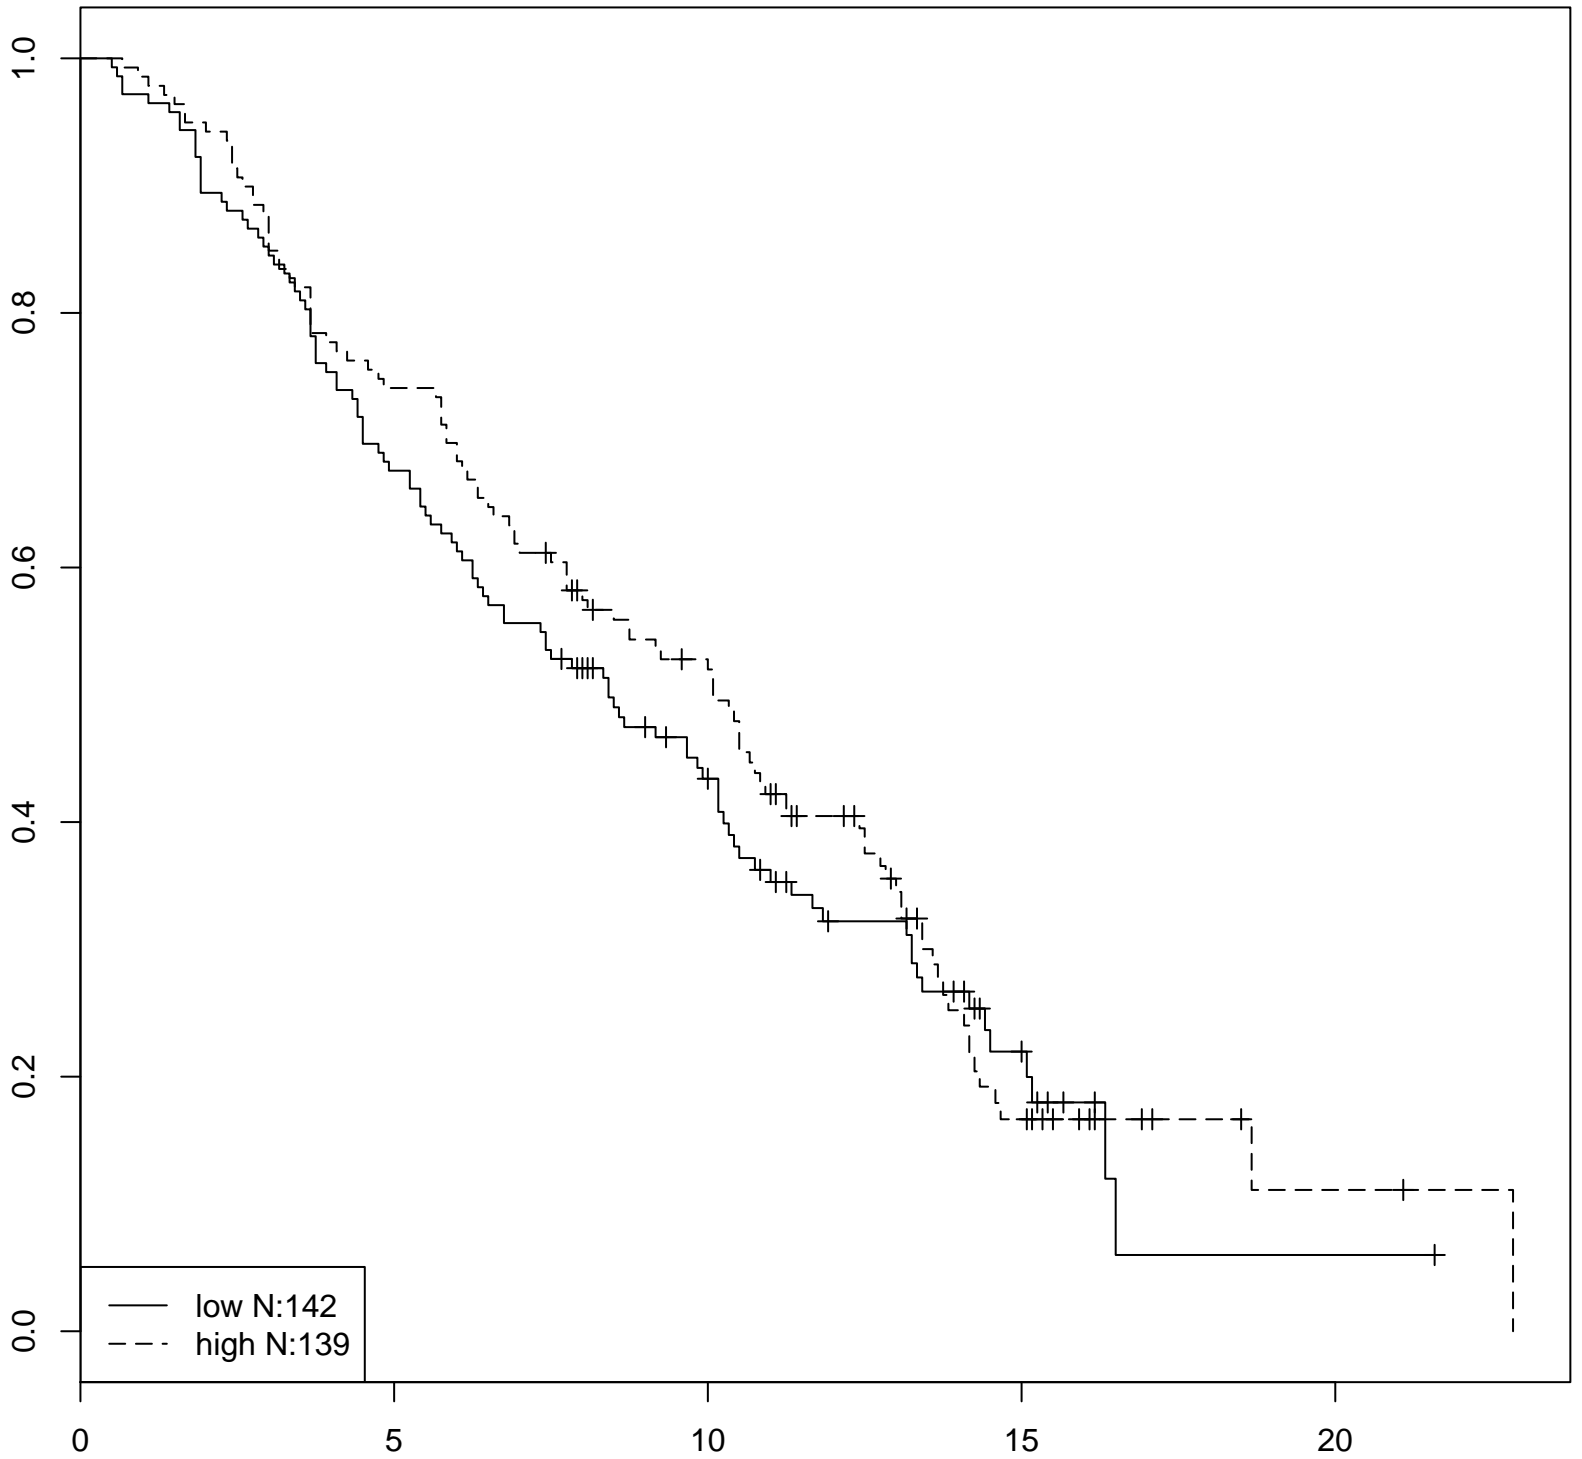

years

log-rank test p-value = 0.423

# Survival by KLK7 expression

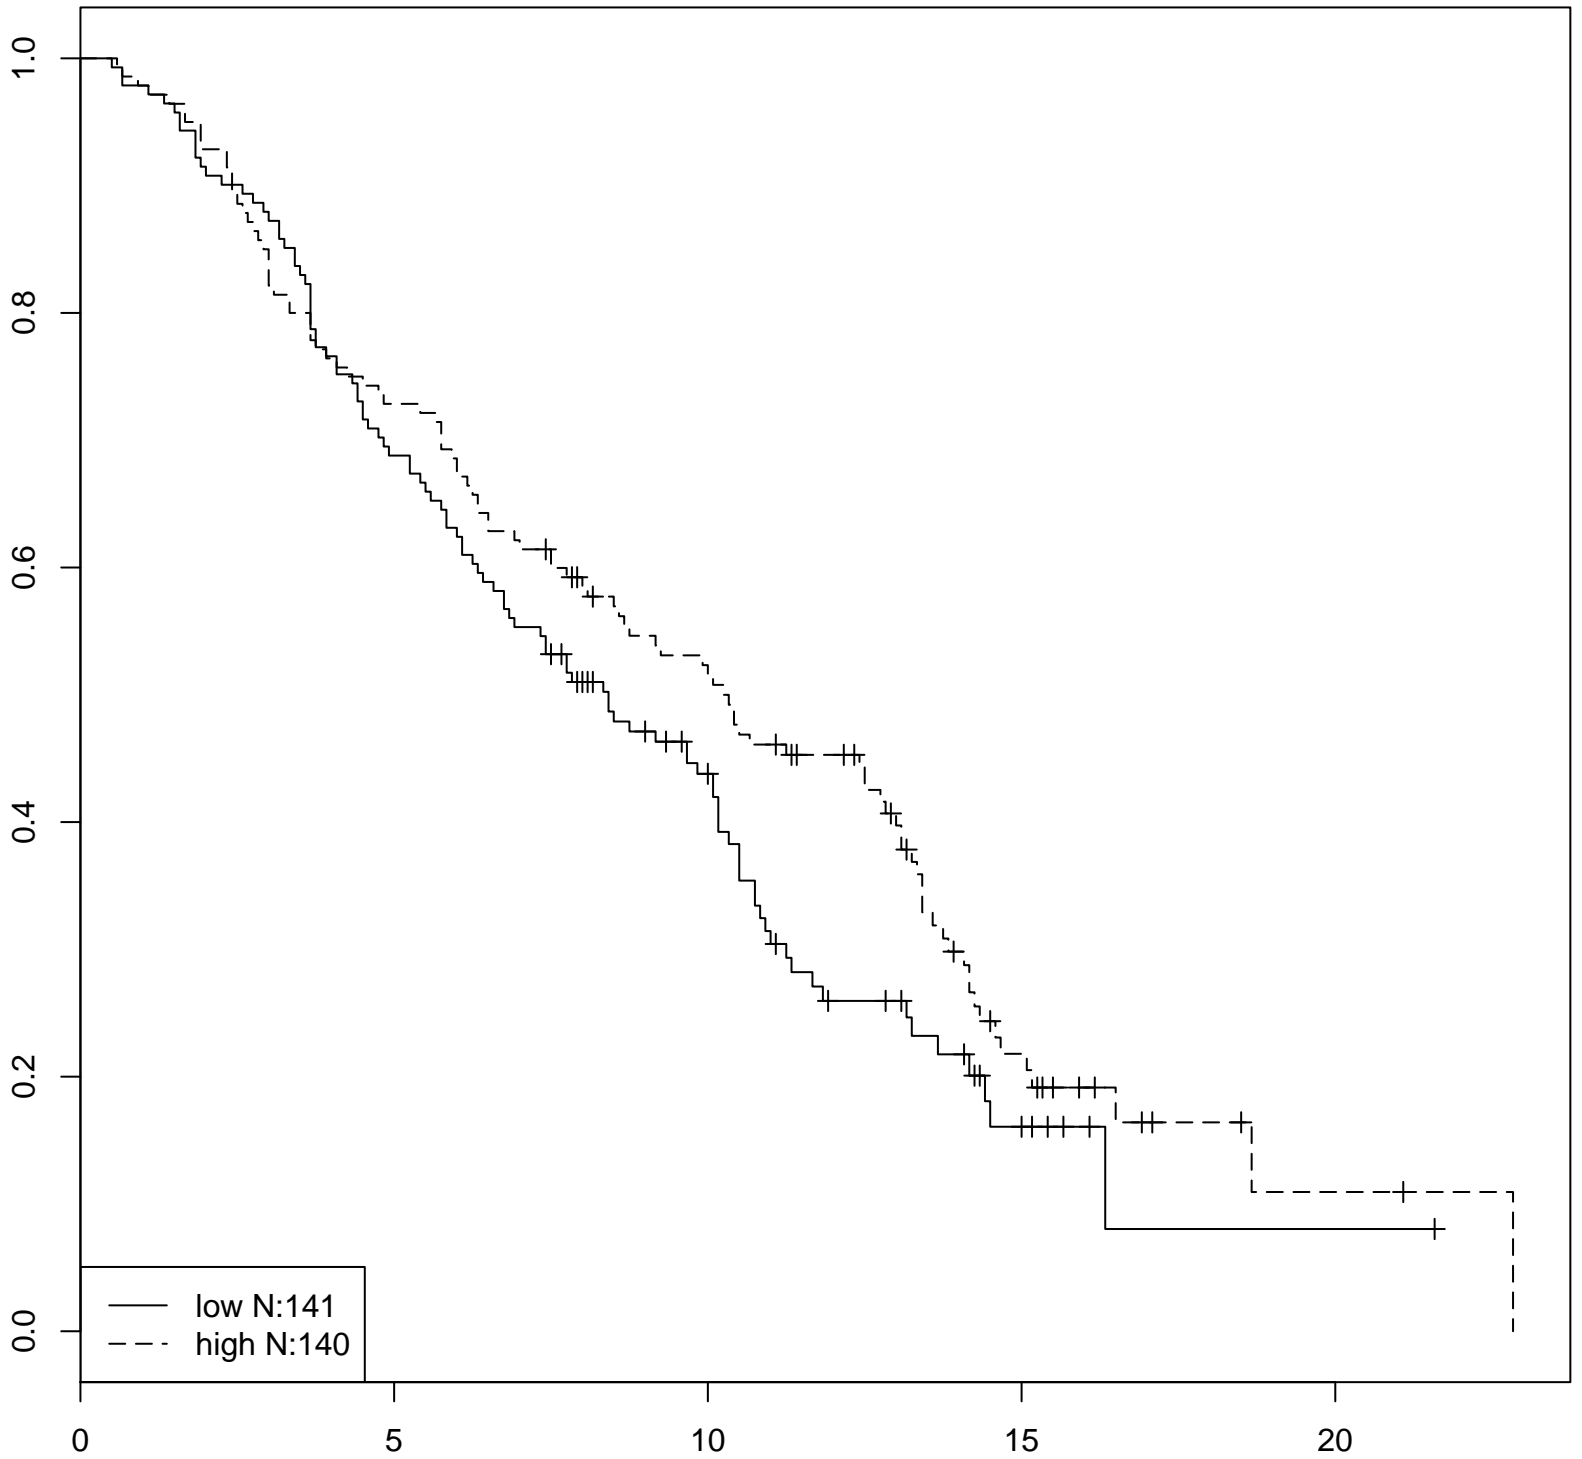

years

log-rank test p-value = 0.095

# Survival by KLK8 expression

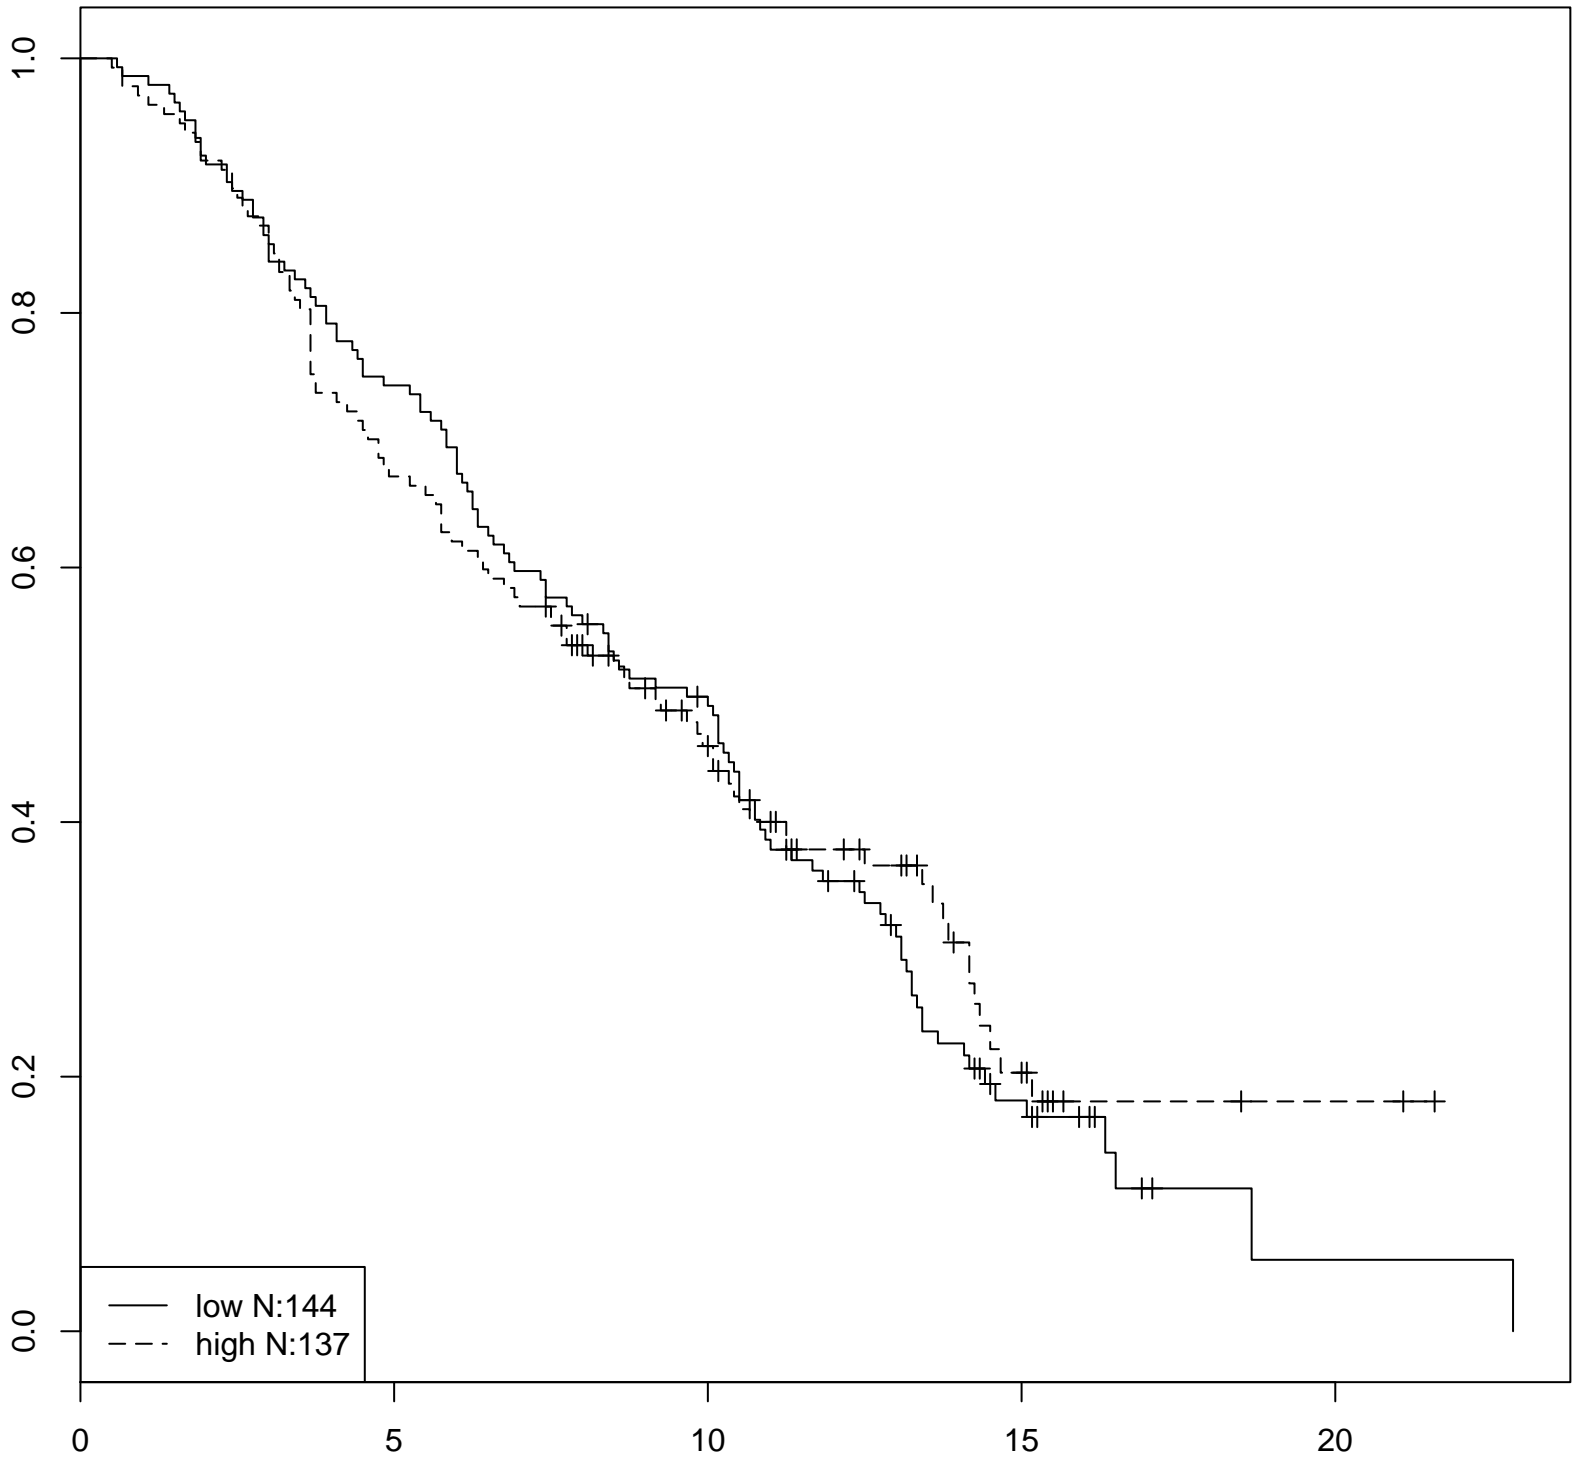

years

log-rank test p-value = 0.69

# Survival by KNG1 expression

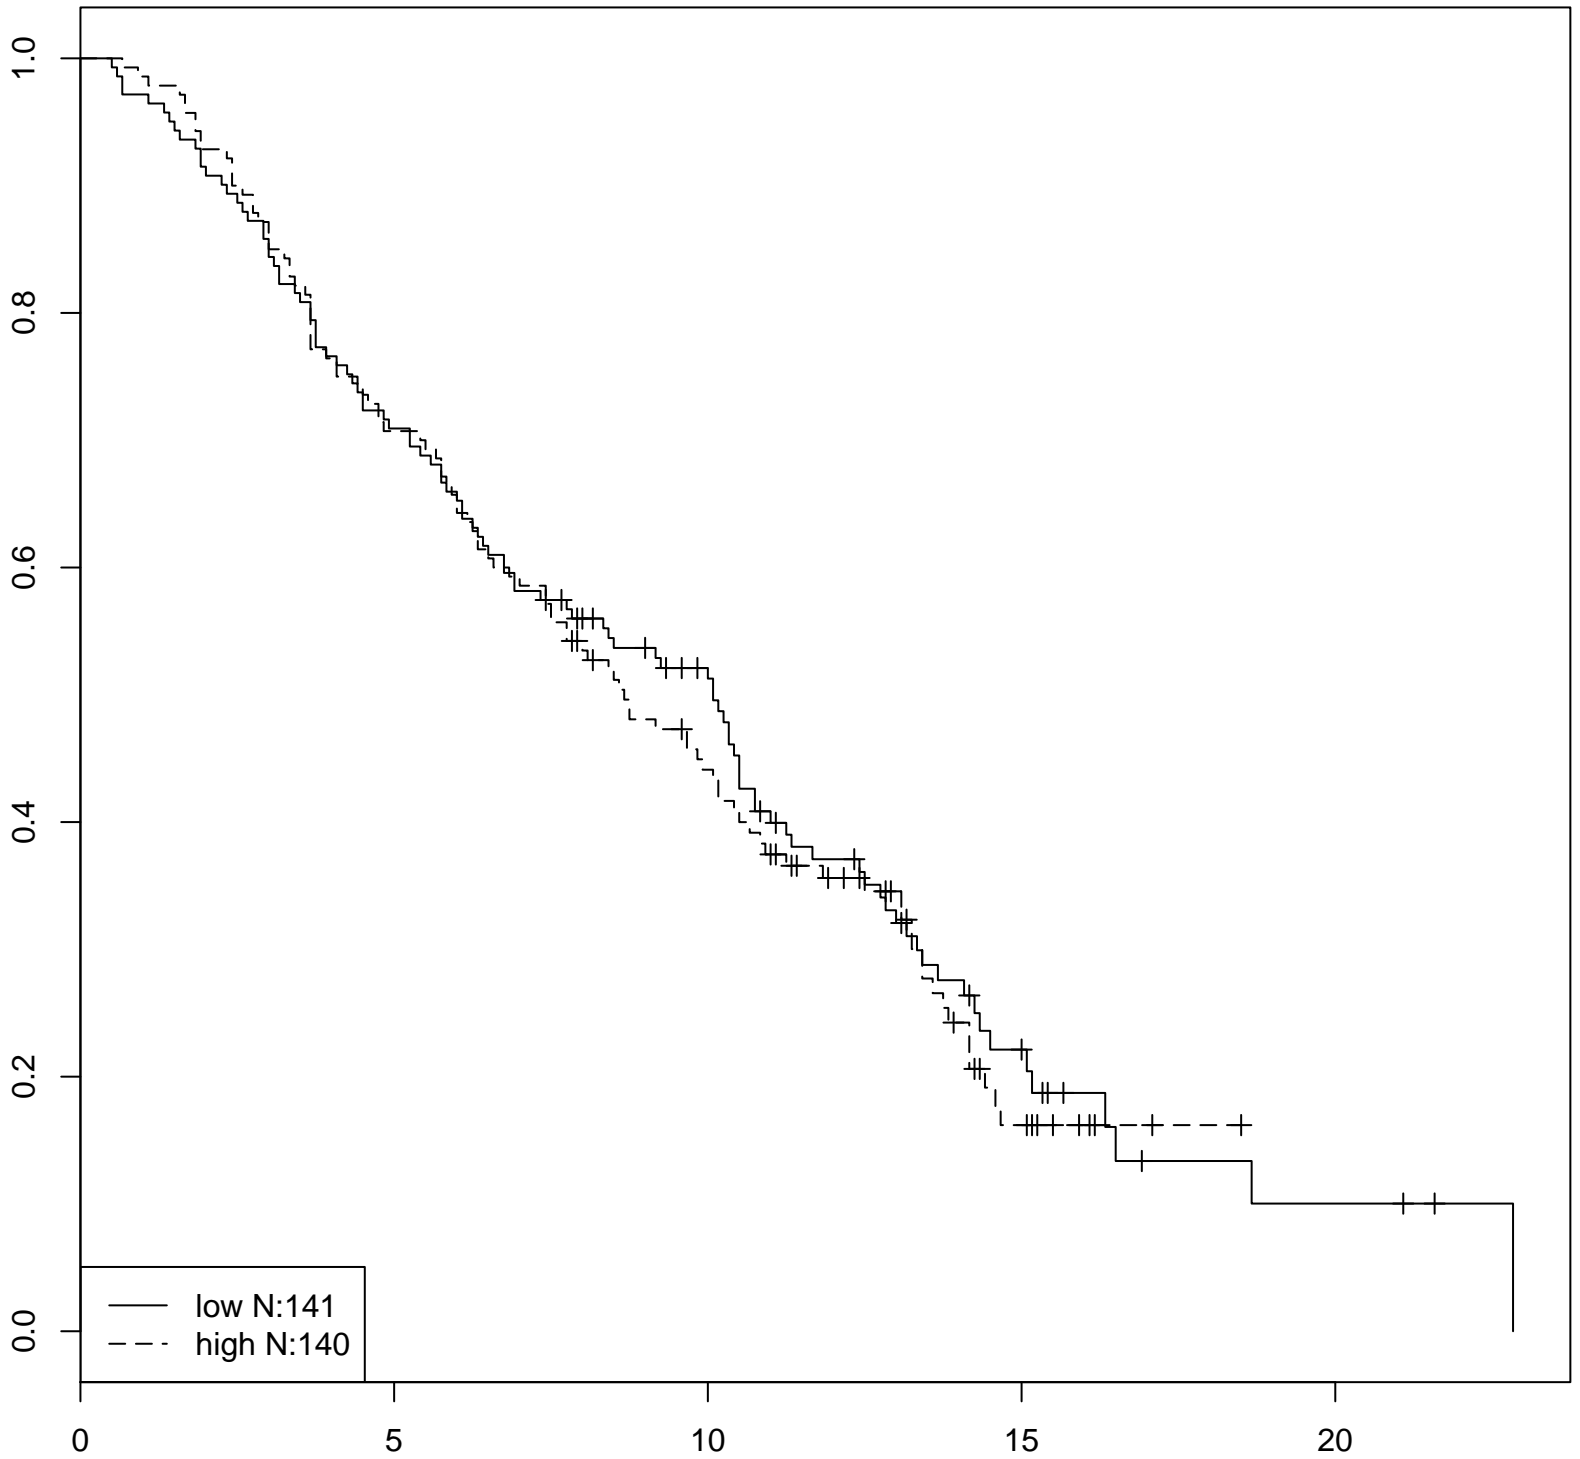

years  
log-rank test p-value = 0.699

# Survival by KPNA2 expression

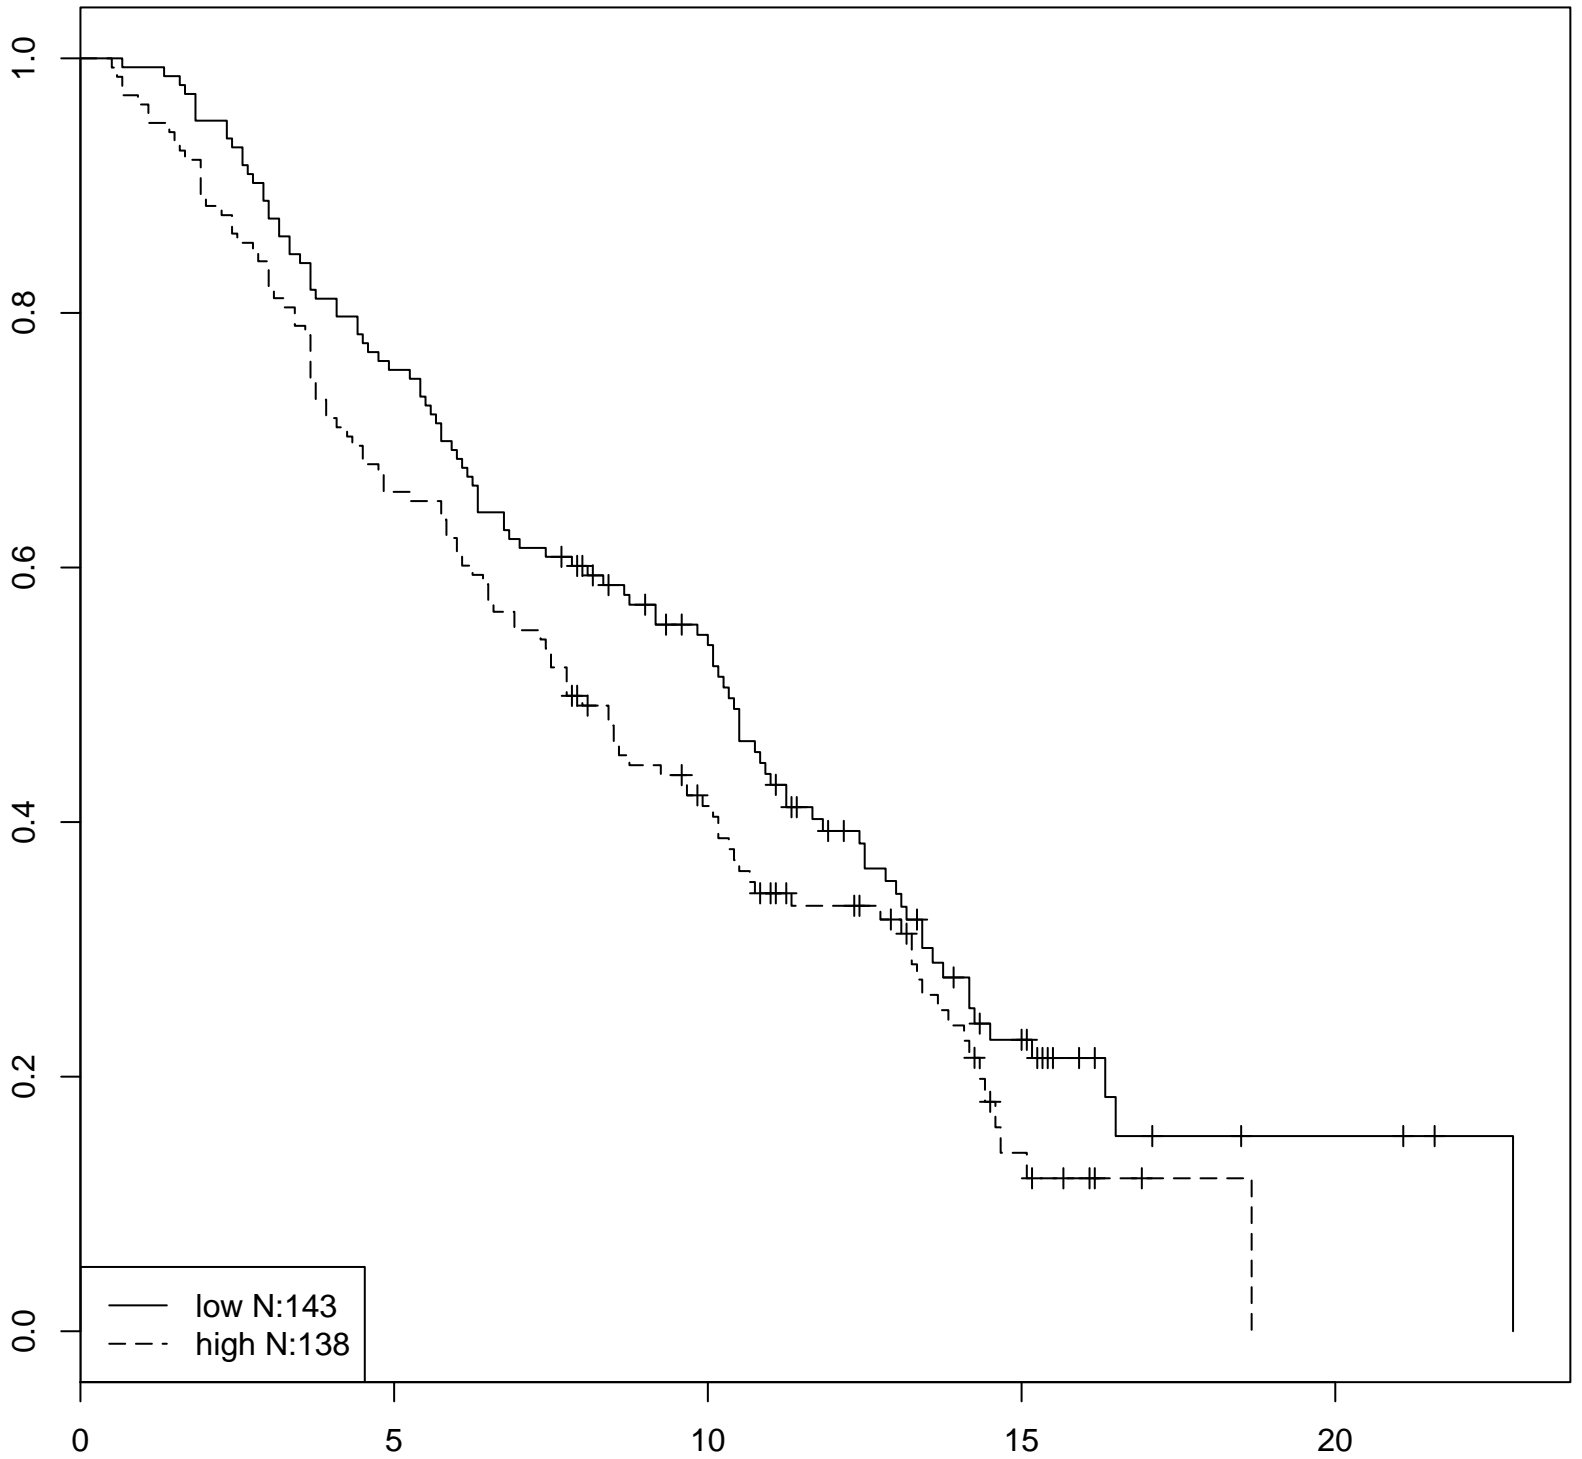

years

log-rank test p-value = 0.075

# Survival by KRT19 expression

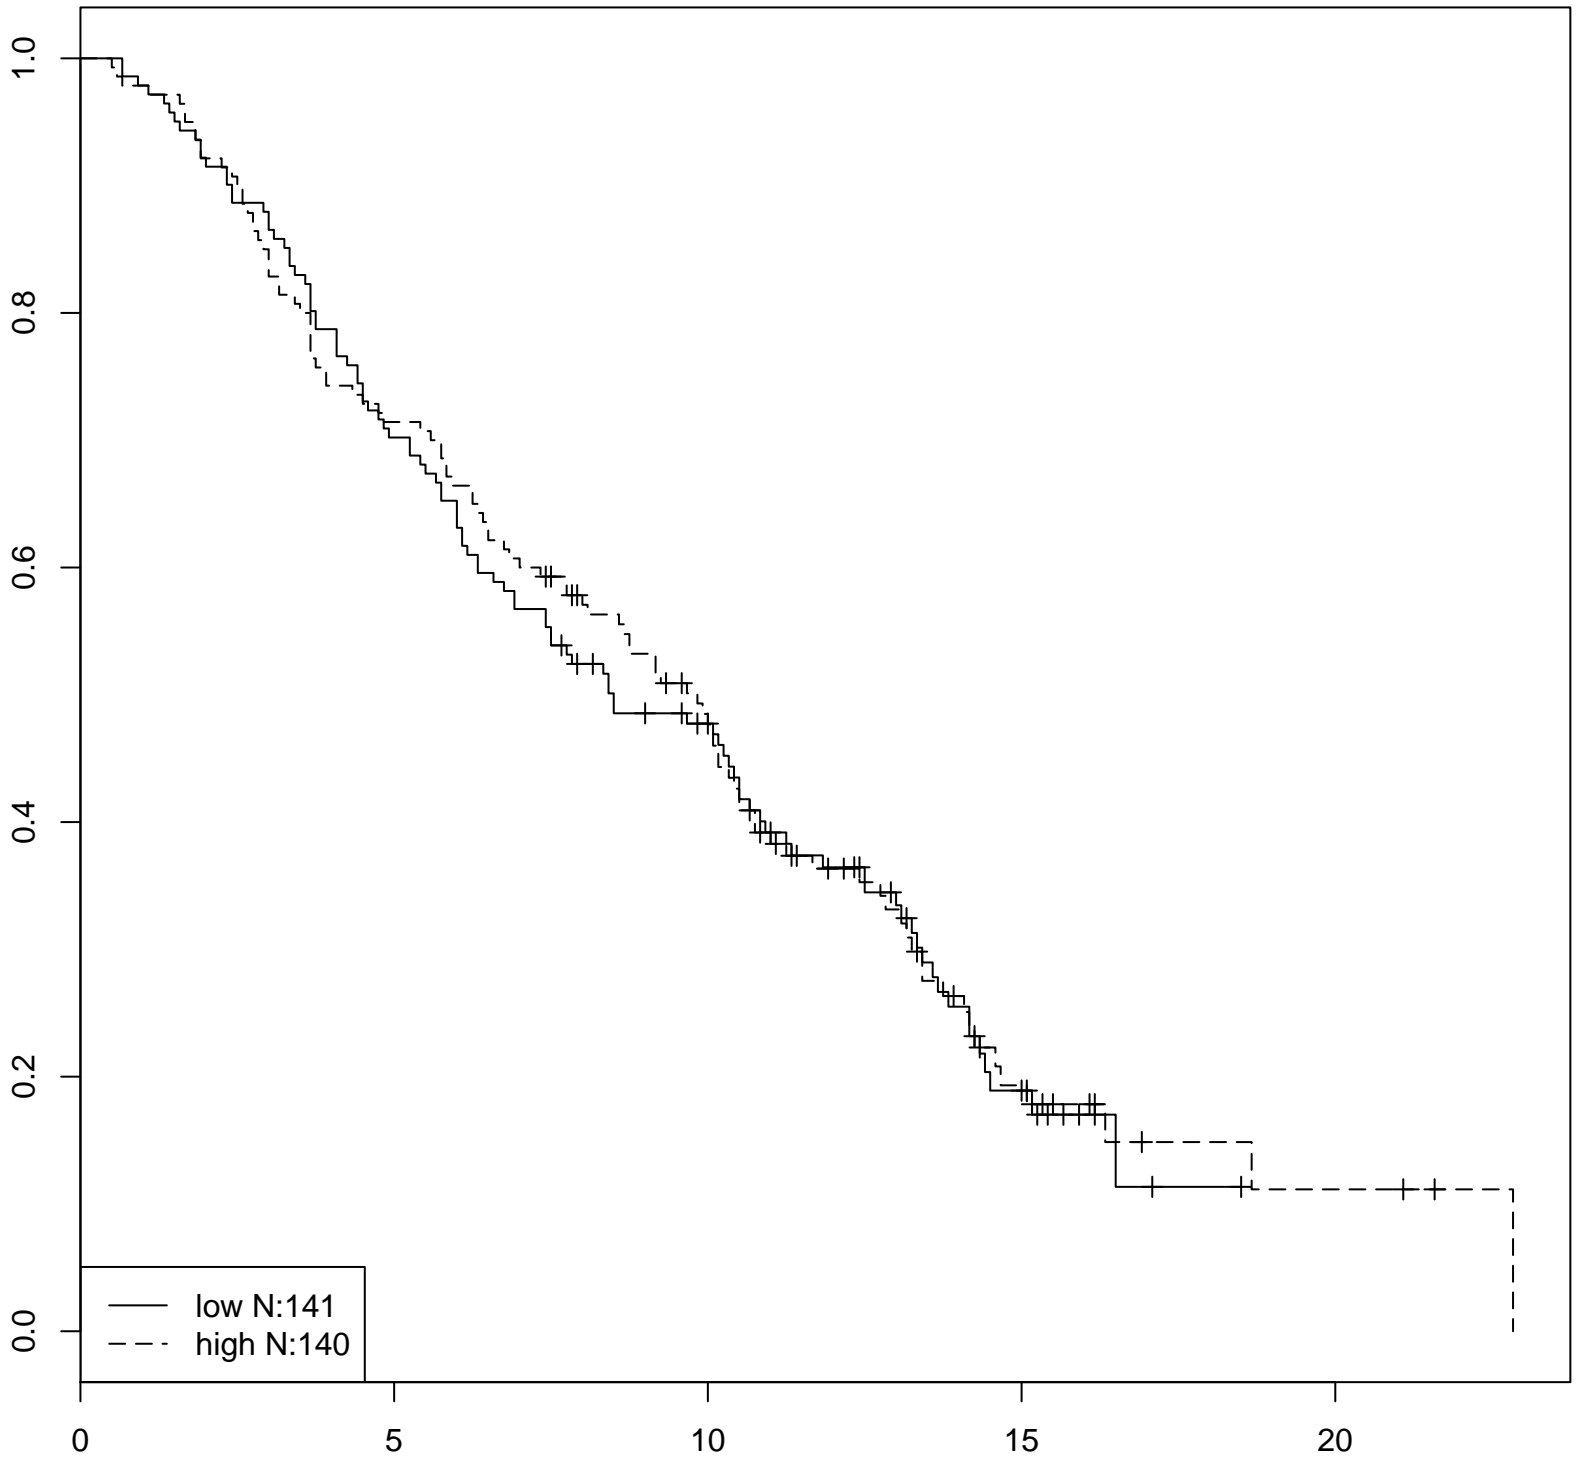

# Survival by KRT5 expression

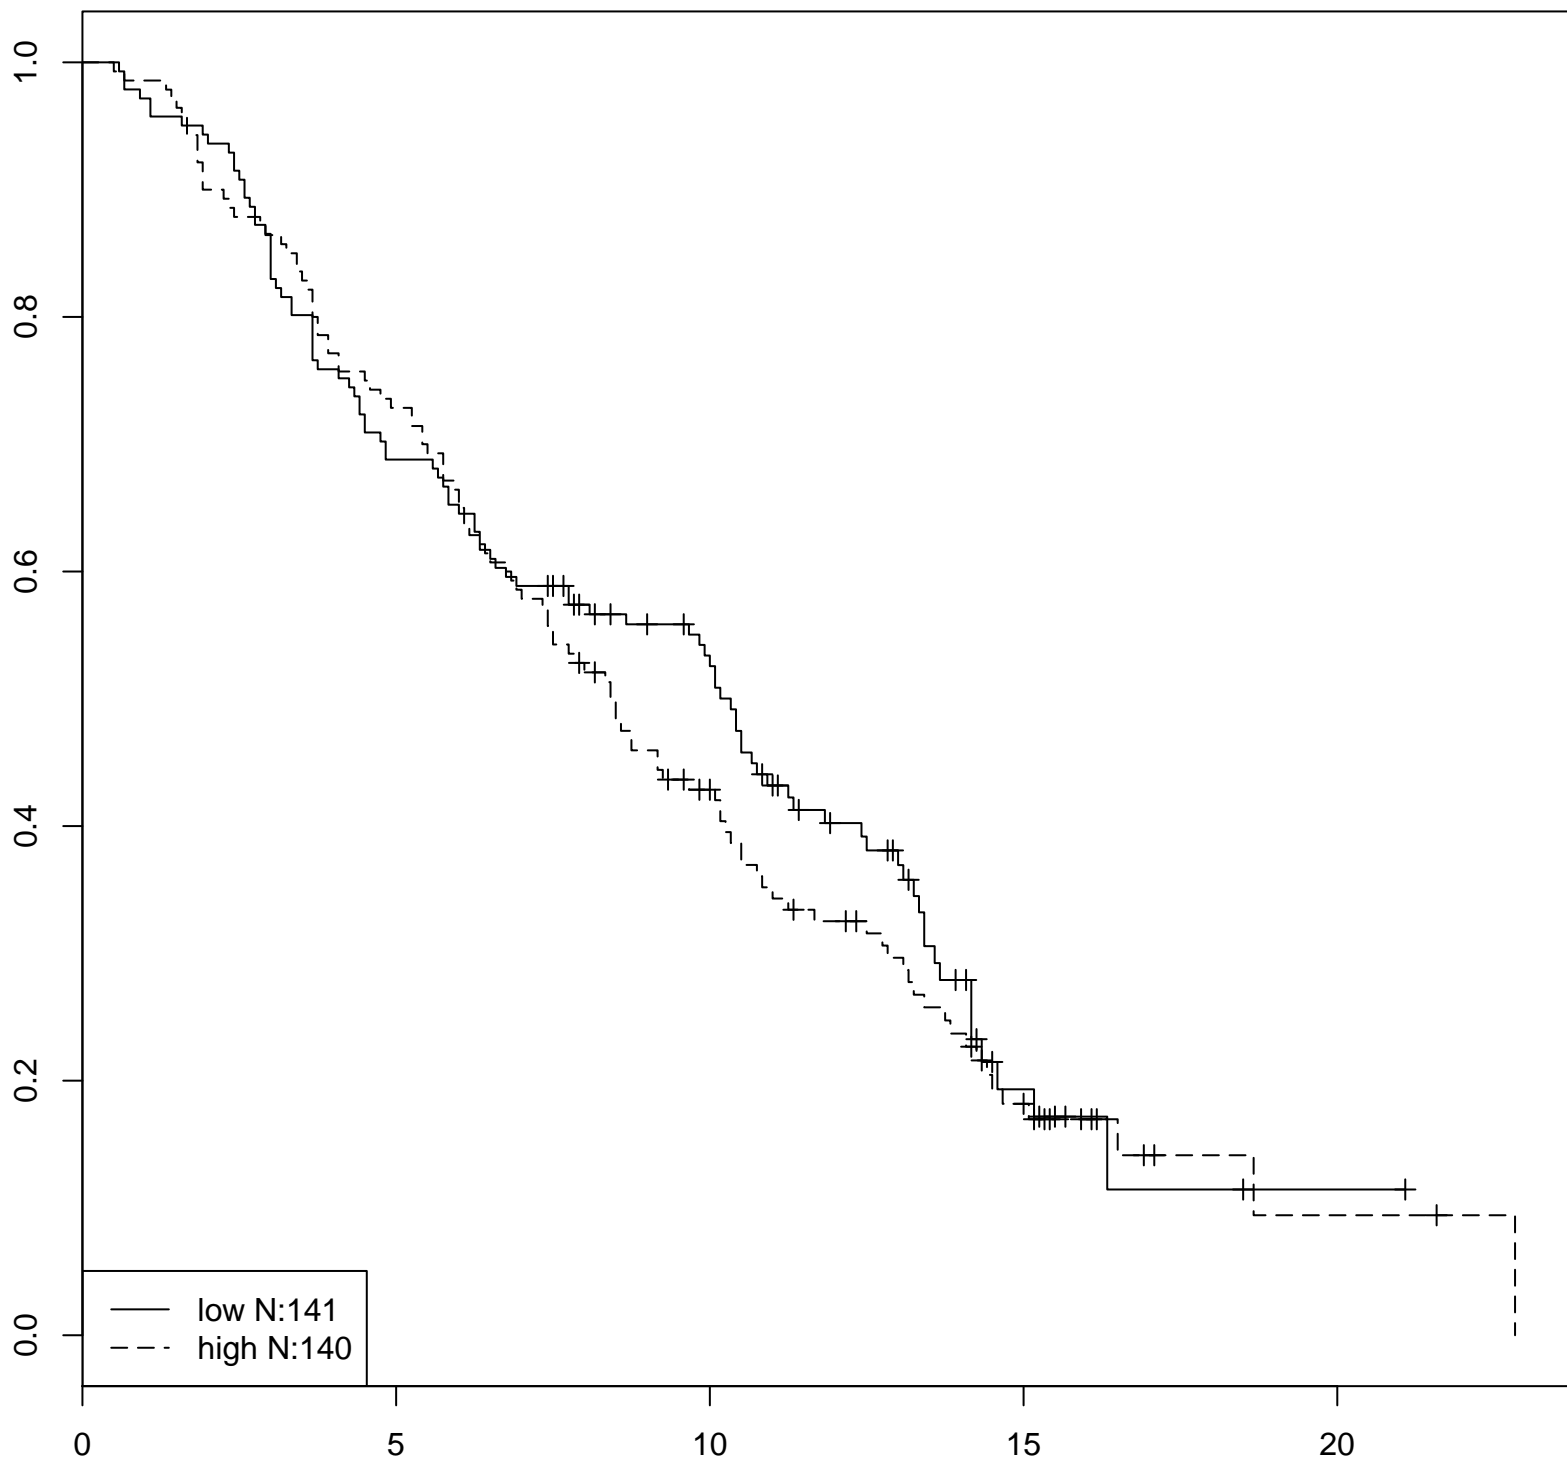

years

log-rank test p-value = 0.431

# Survival by KRT7 expression

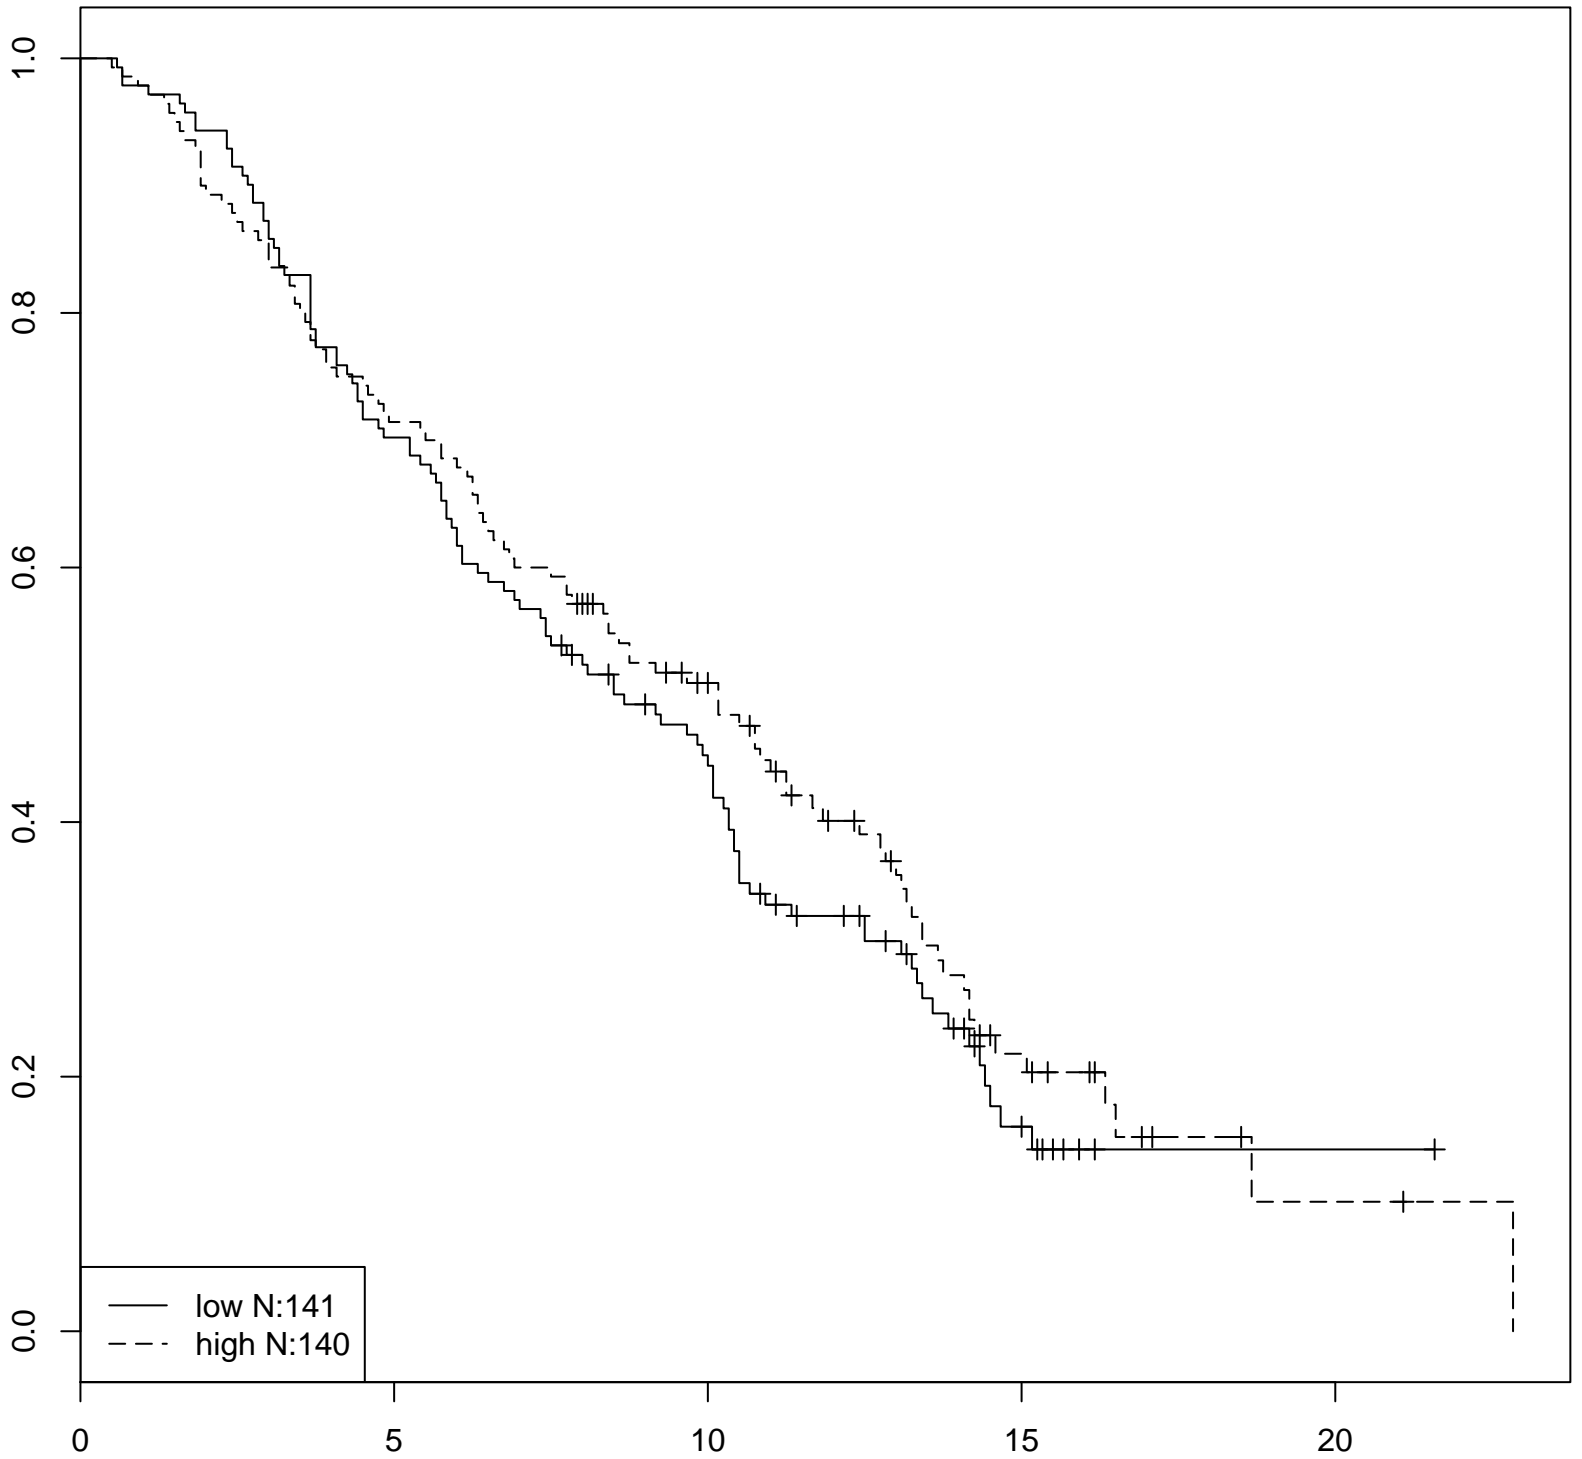

years

log-rank test p-value = 0.319



# Survival by LEP expression

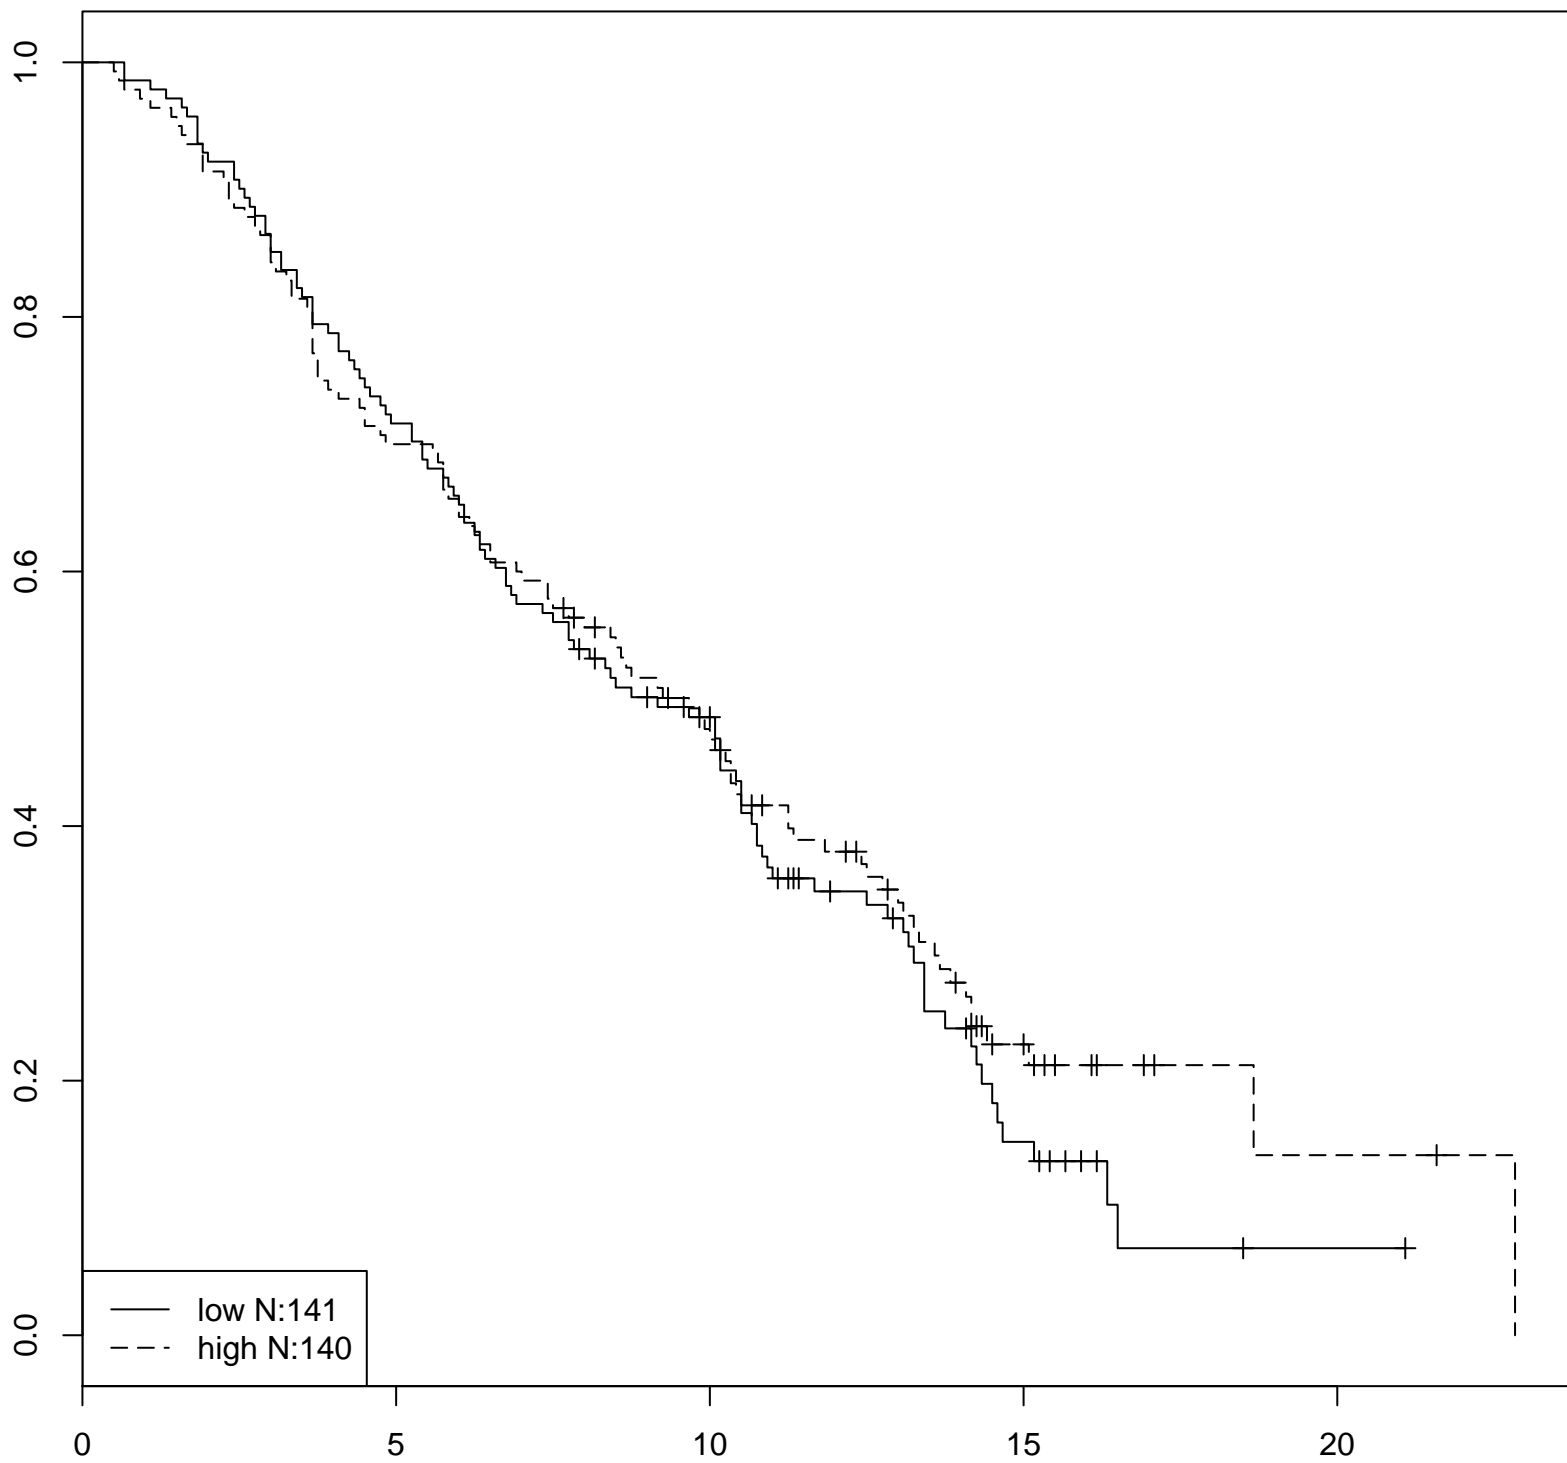

years

log-rank test p-value = 0.453

# Survival by LGALS3 expression

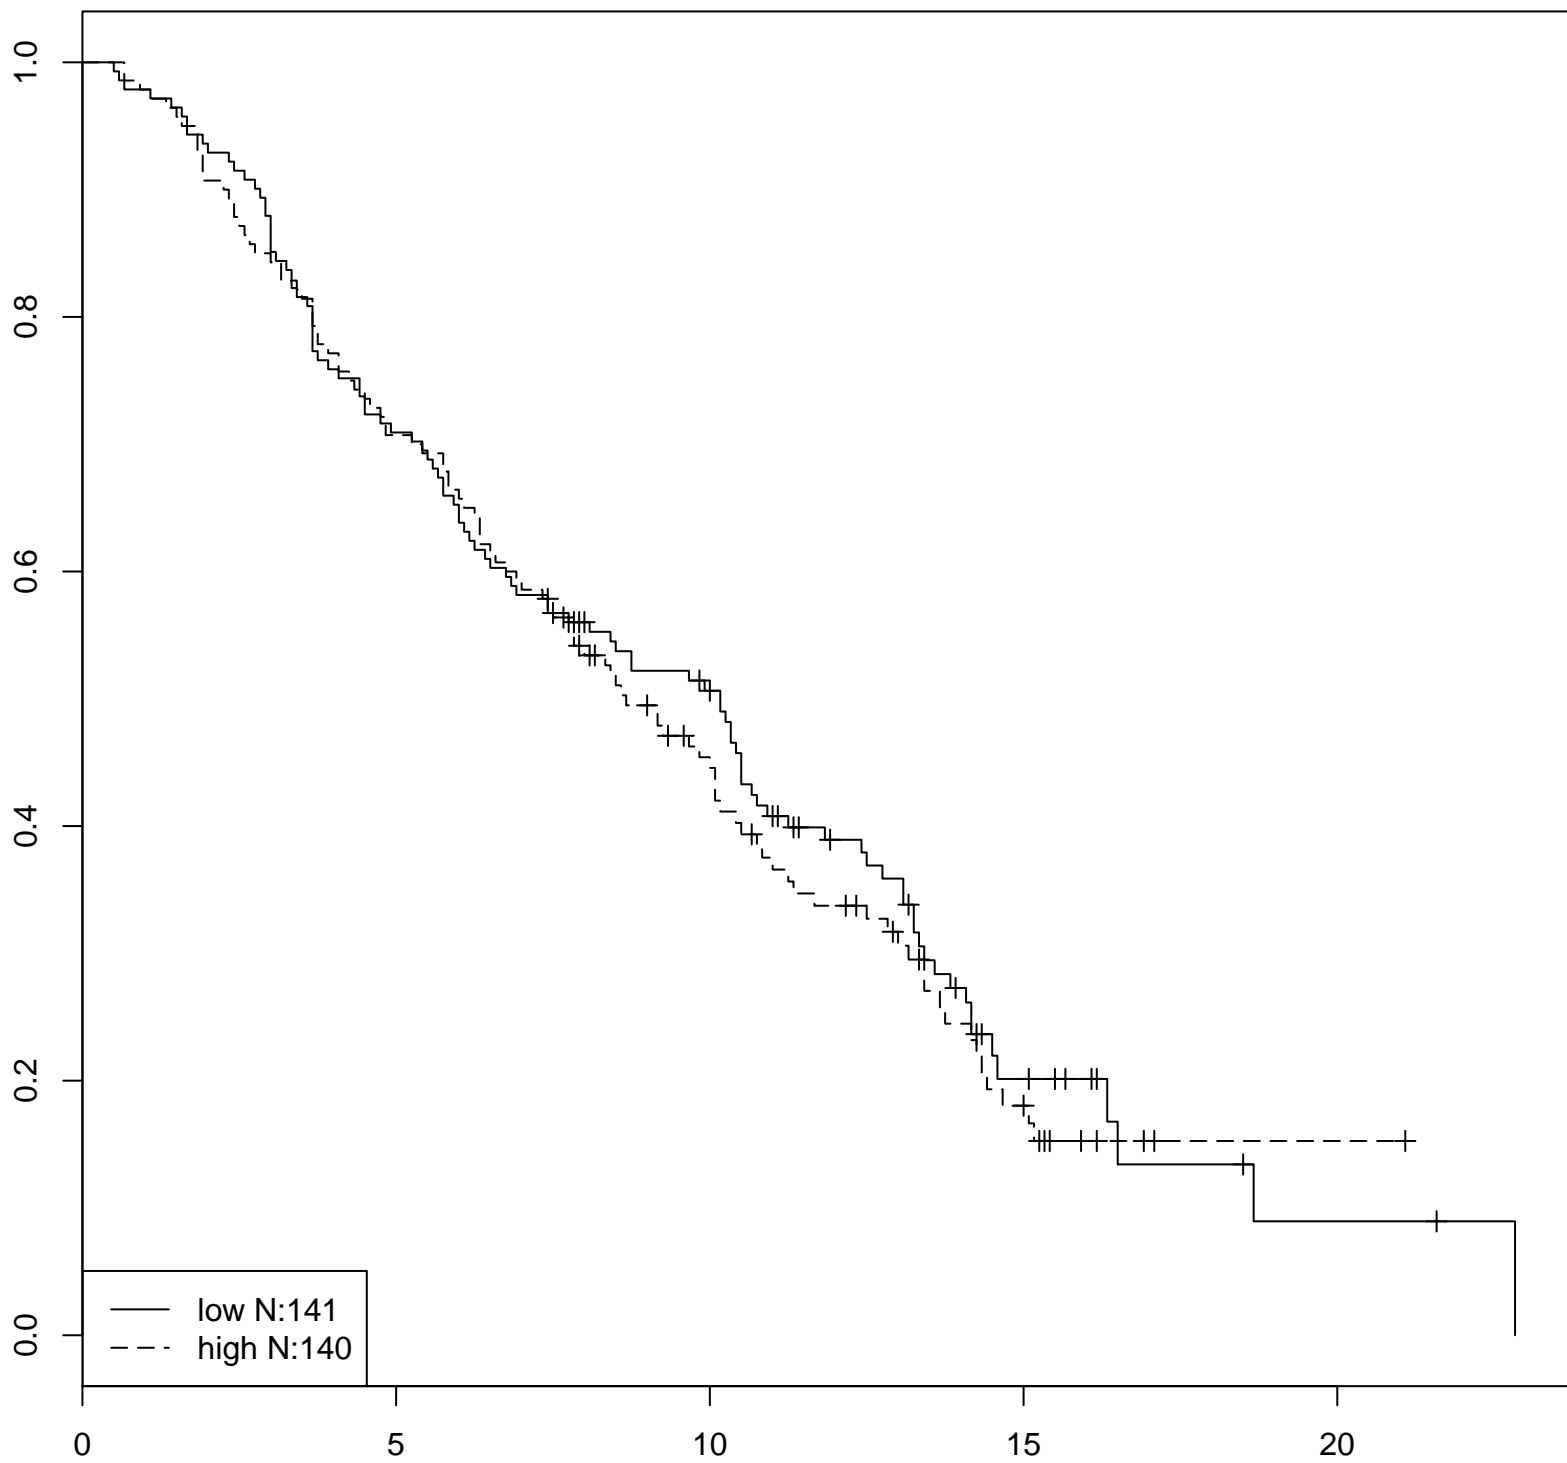

years

log-rank test p-value = 0.593

# Survival by LOX expression

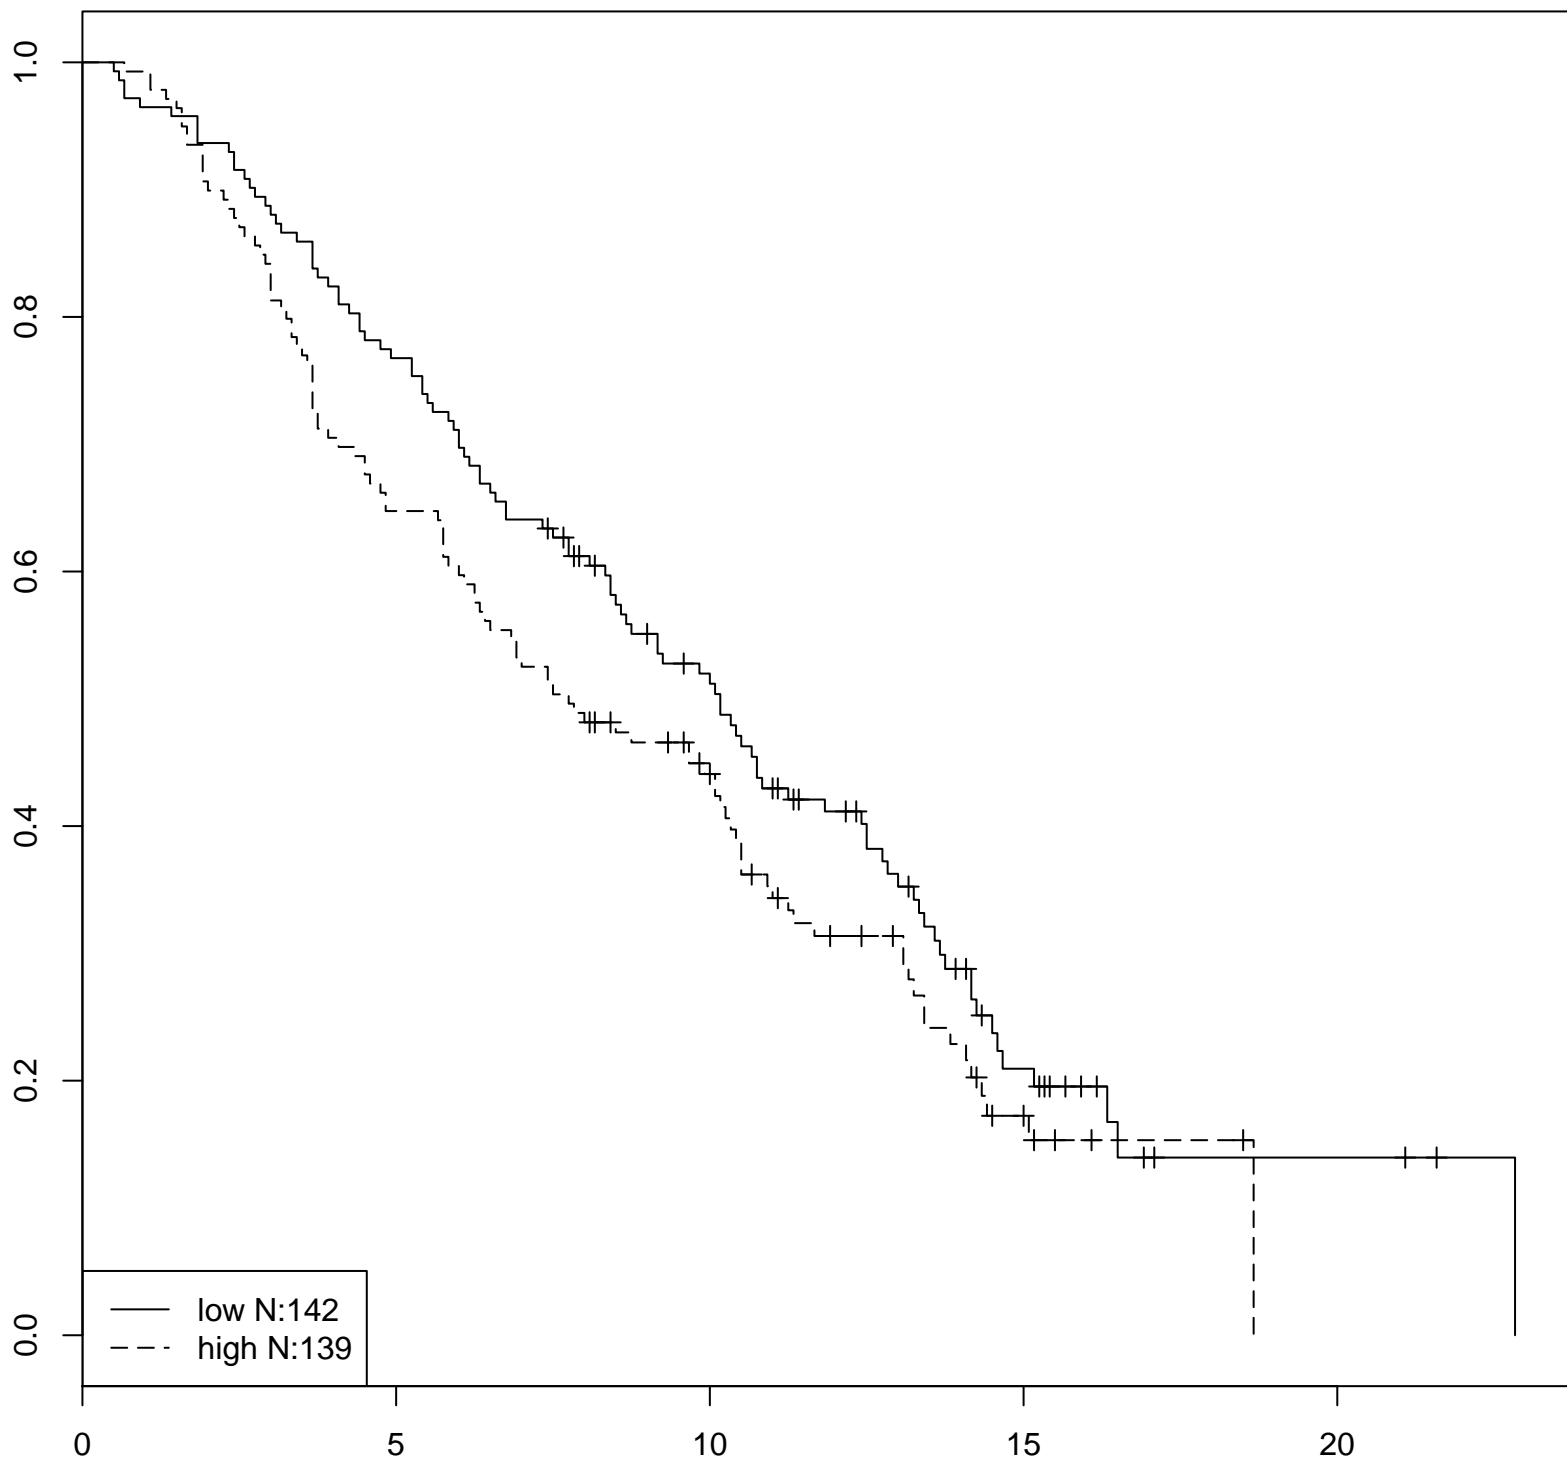

years

log-rank test p-value = 0.092

# Survival by LRIG1 expression

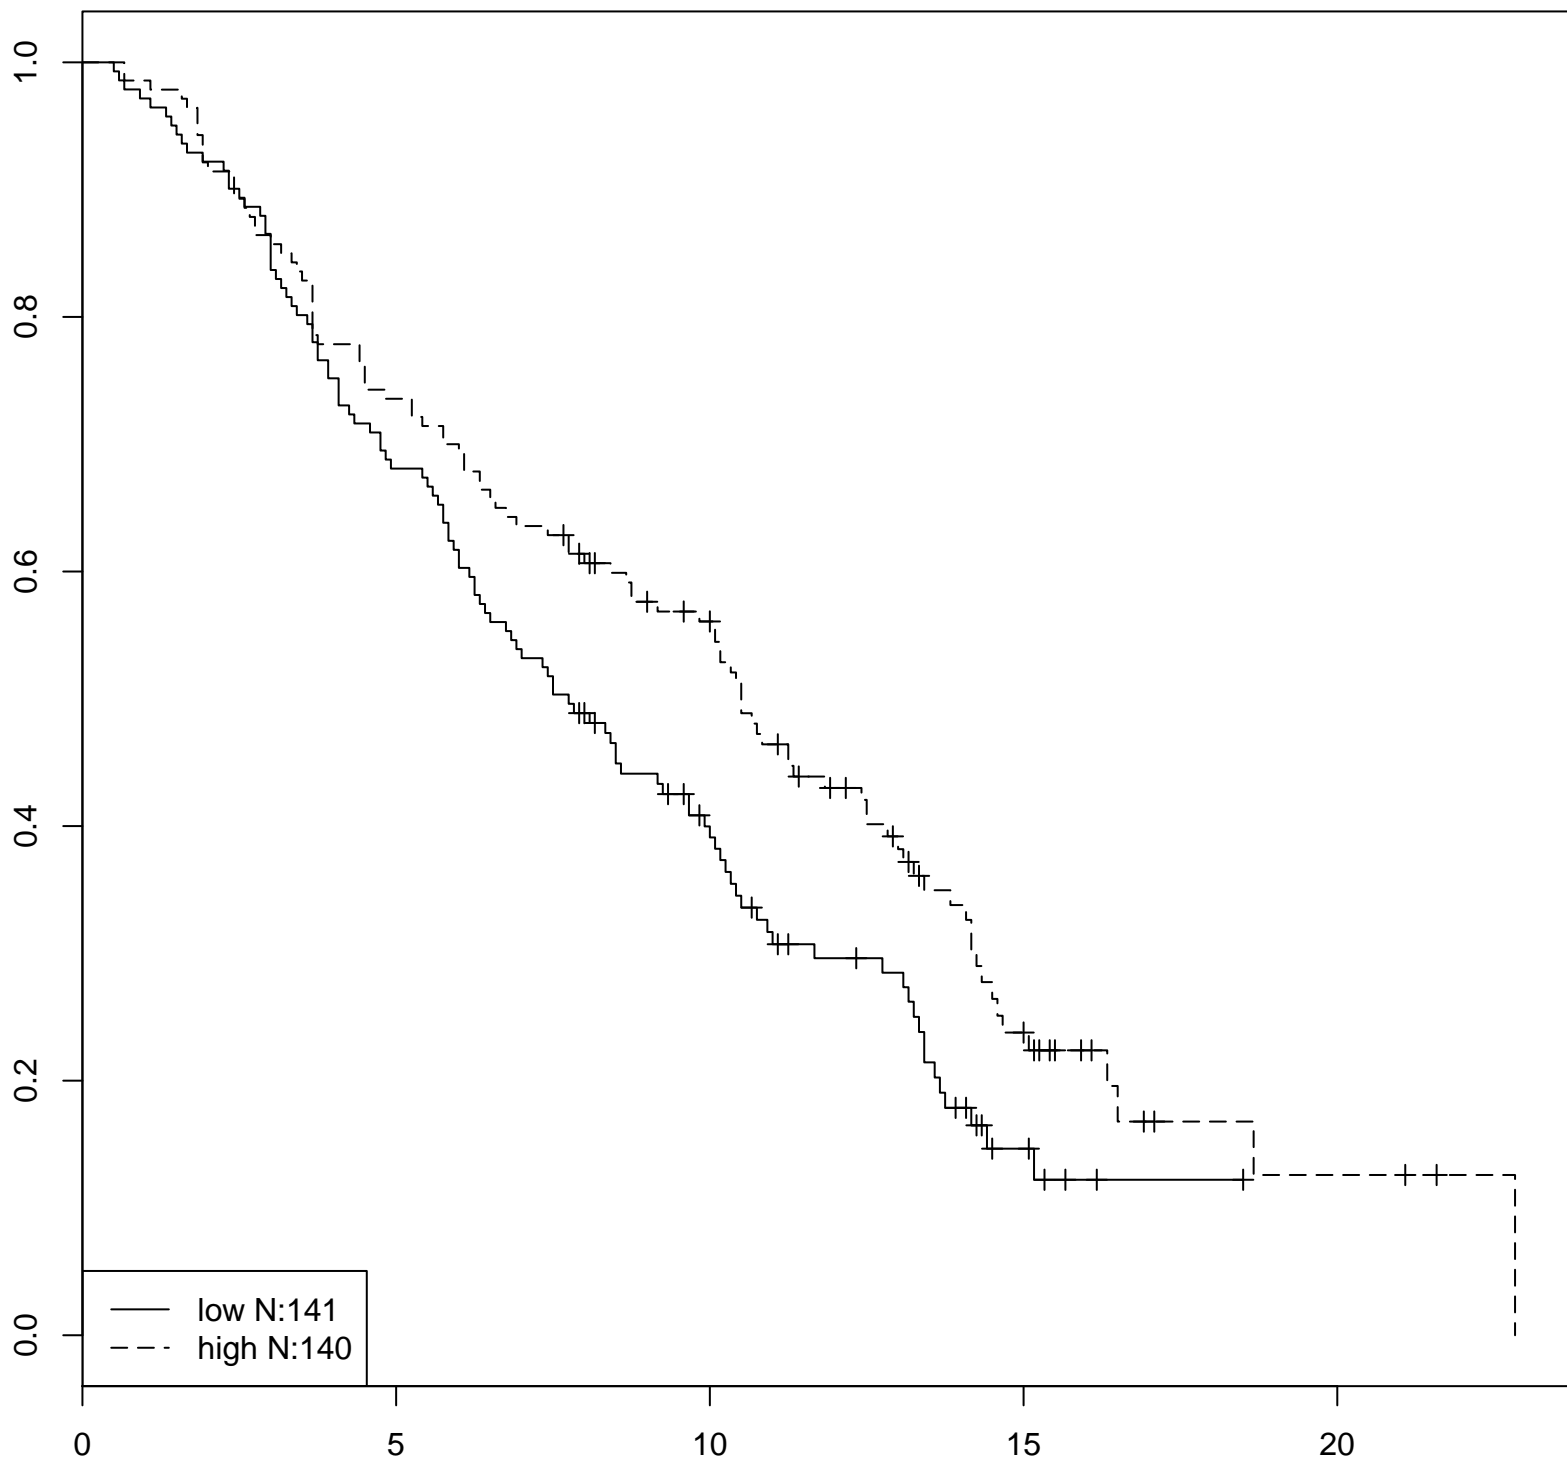

years

log-rank test p-value = 0.014

# Survival by MAP3K5 expression

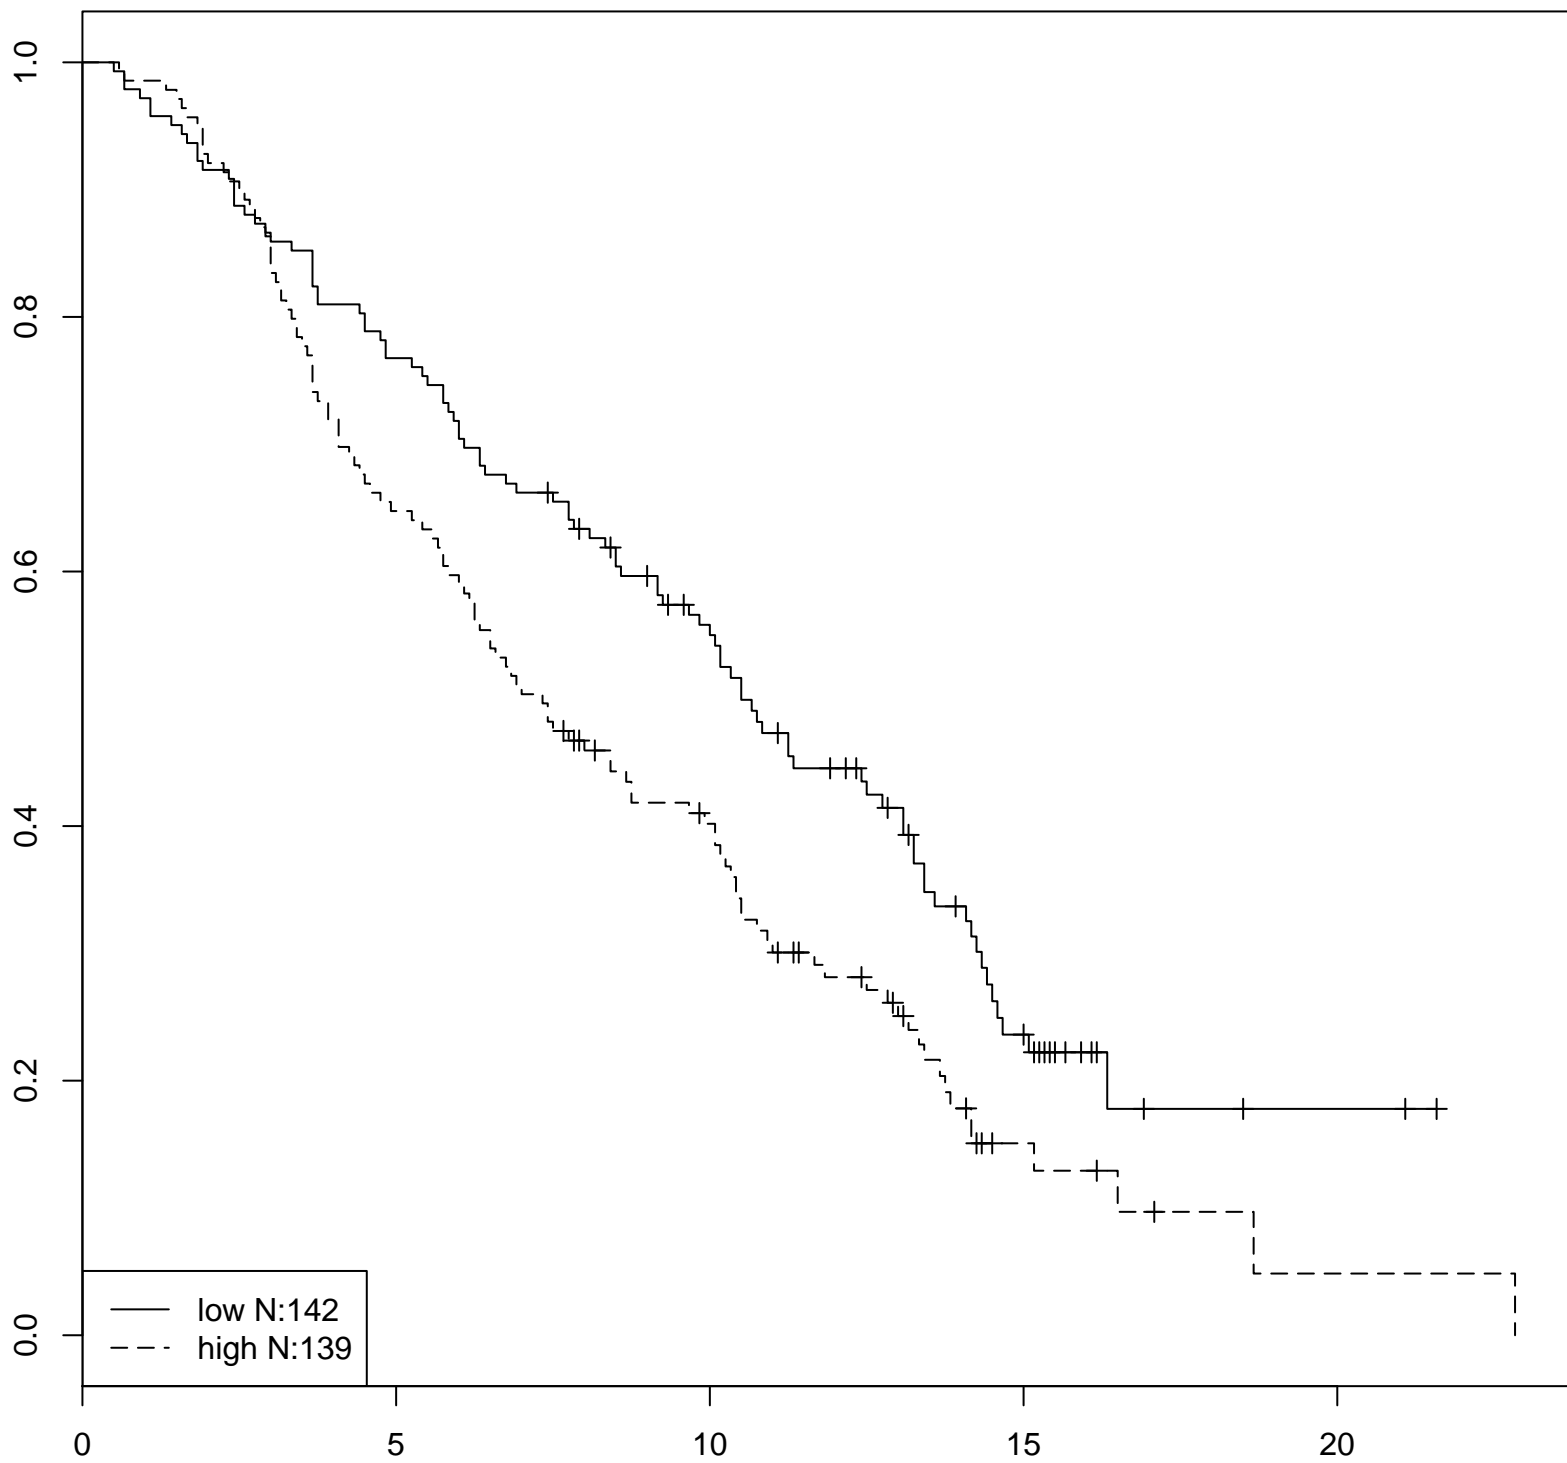

years

log-rank test p-value = 0.003

# Survival by MAPK1 expression

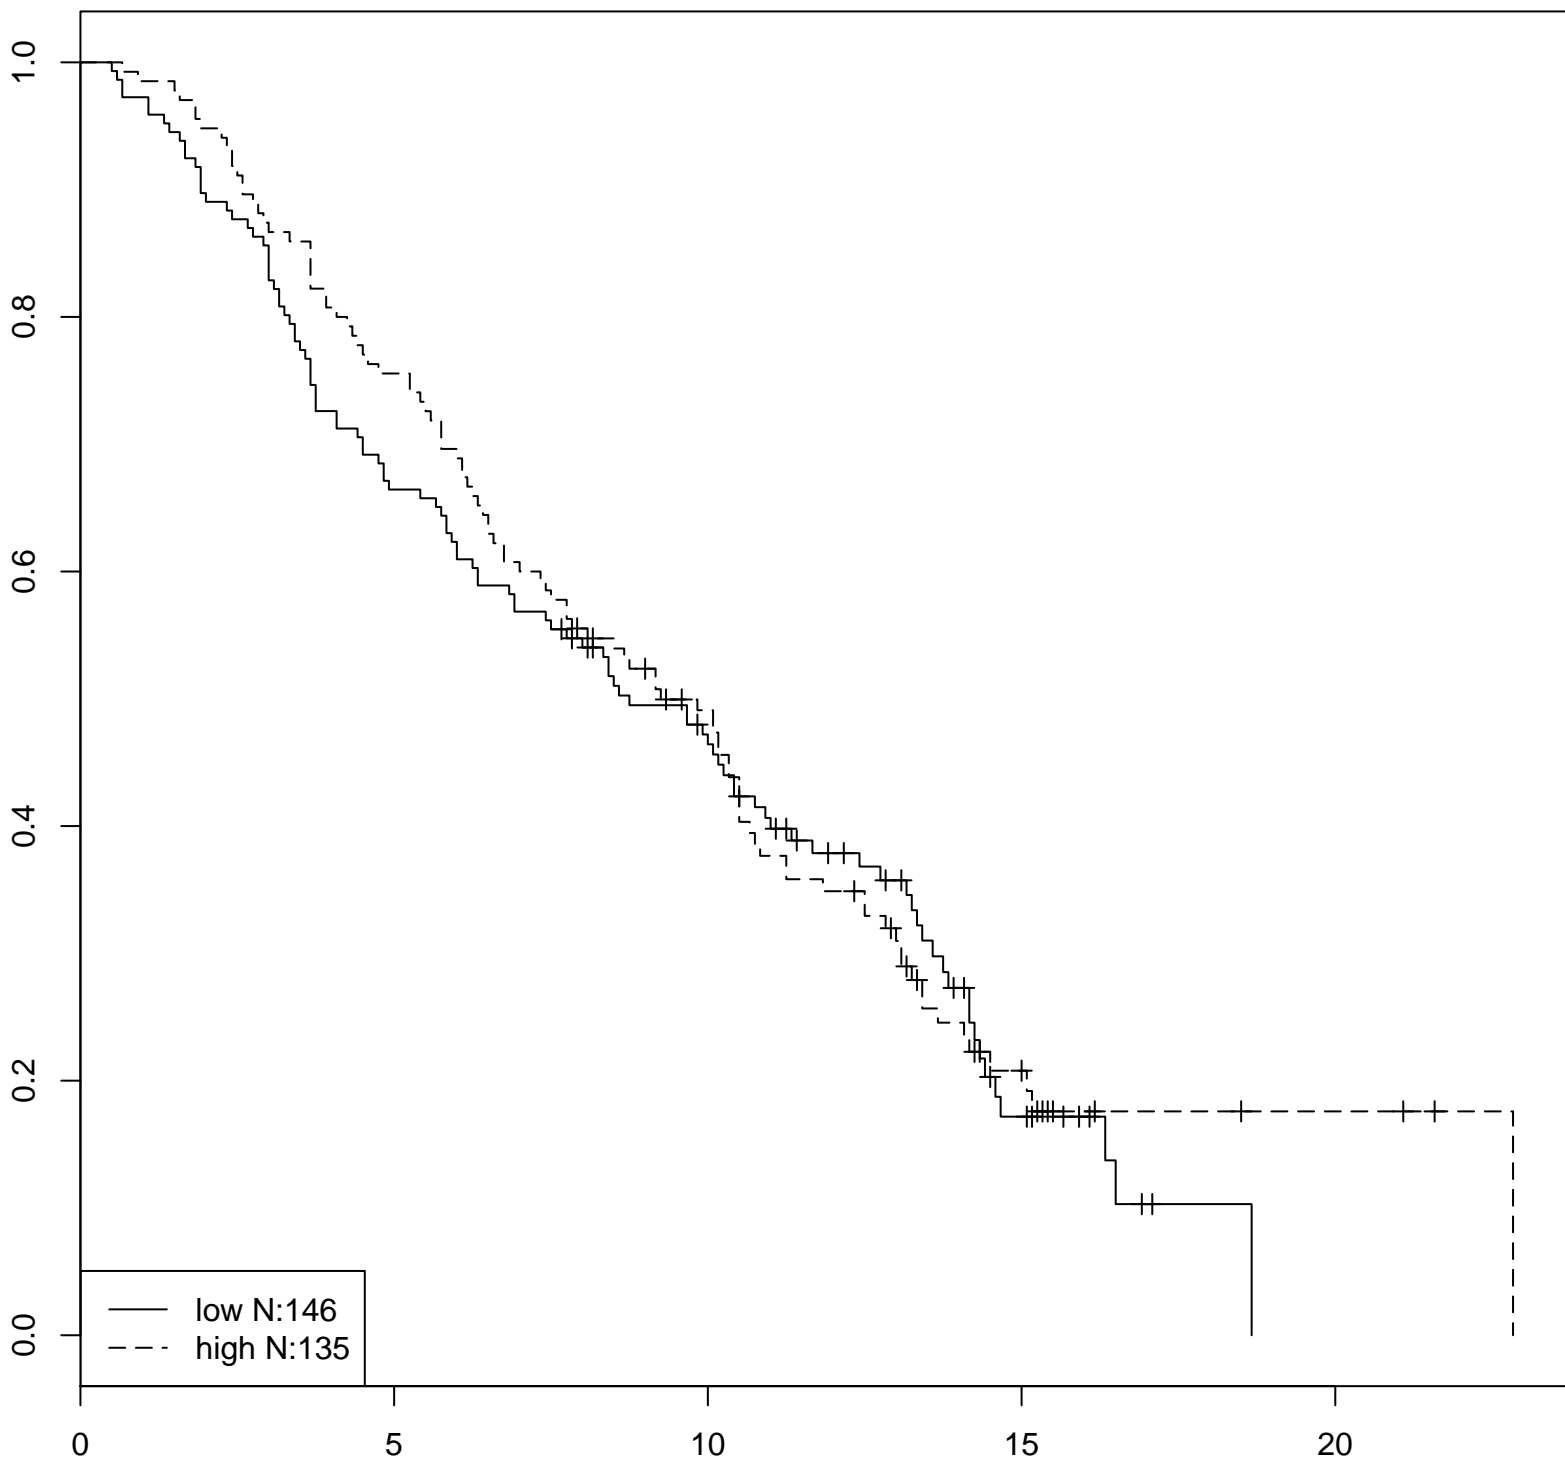

years  
log-rank test p-value = 0.681

# Survival by MARCKSL1 expression

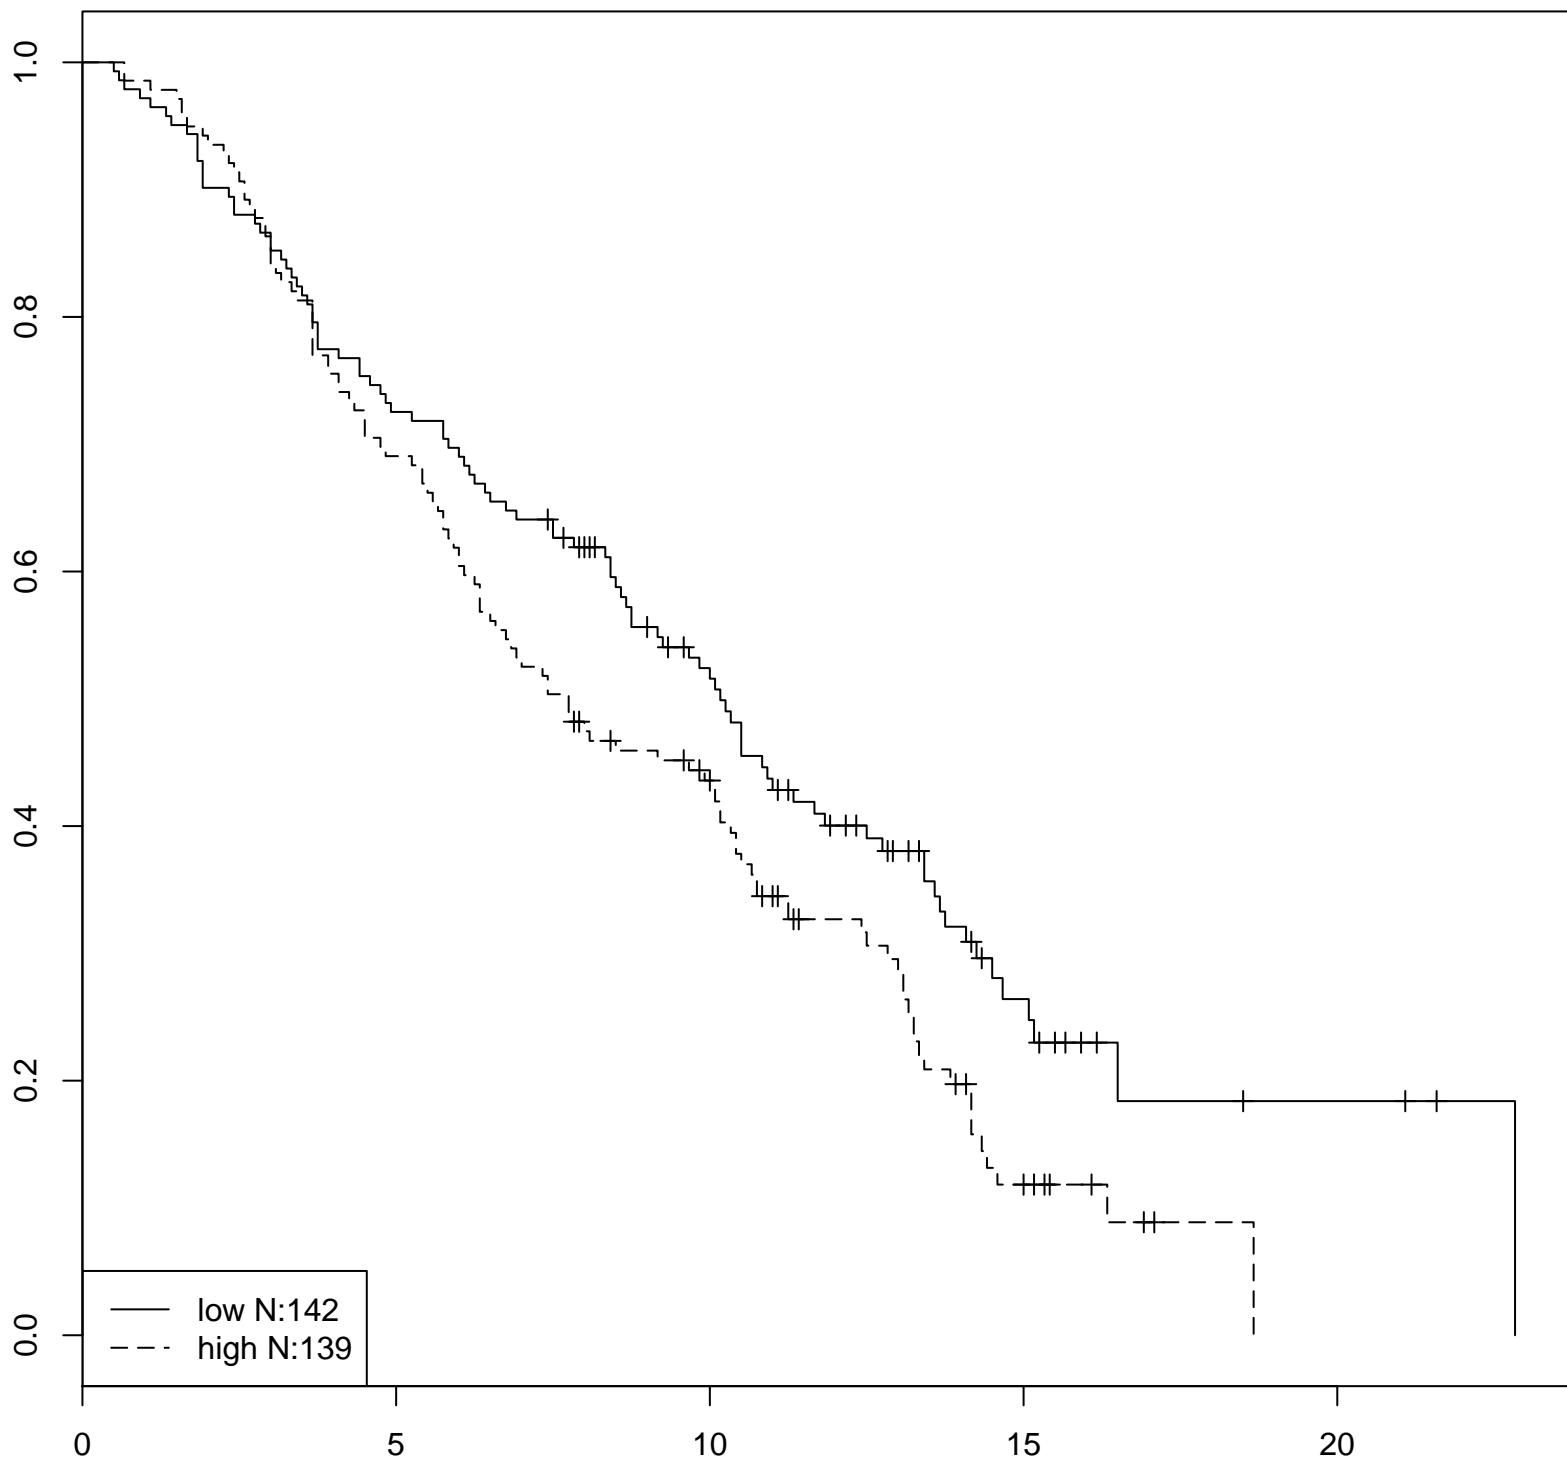

years  
log-rank test p-value = 0.019

# Survival by MCM2 expression

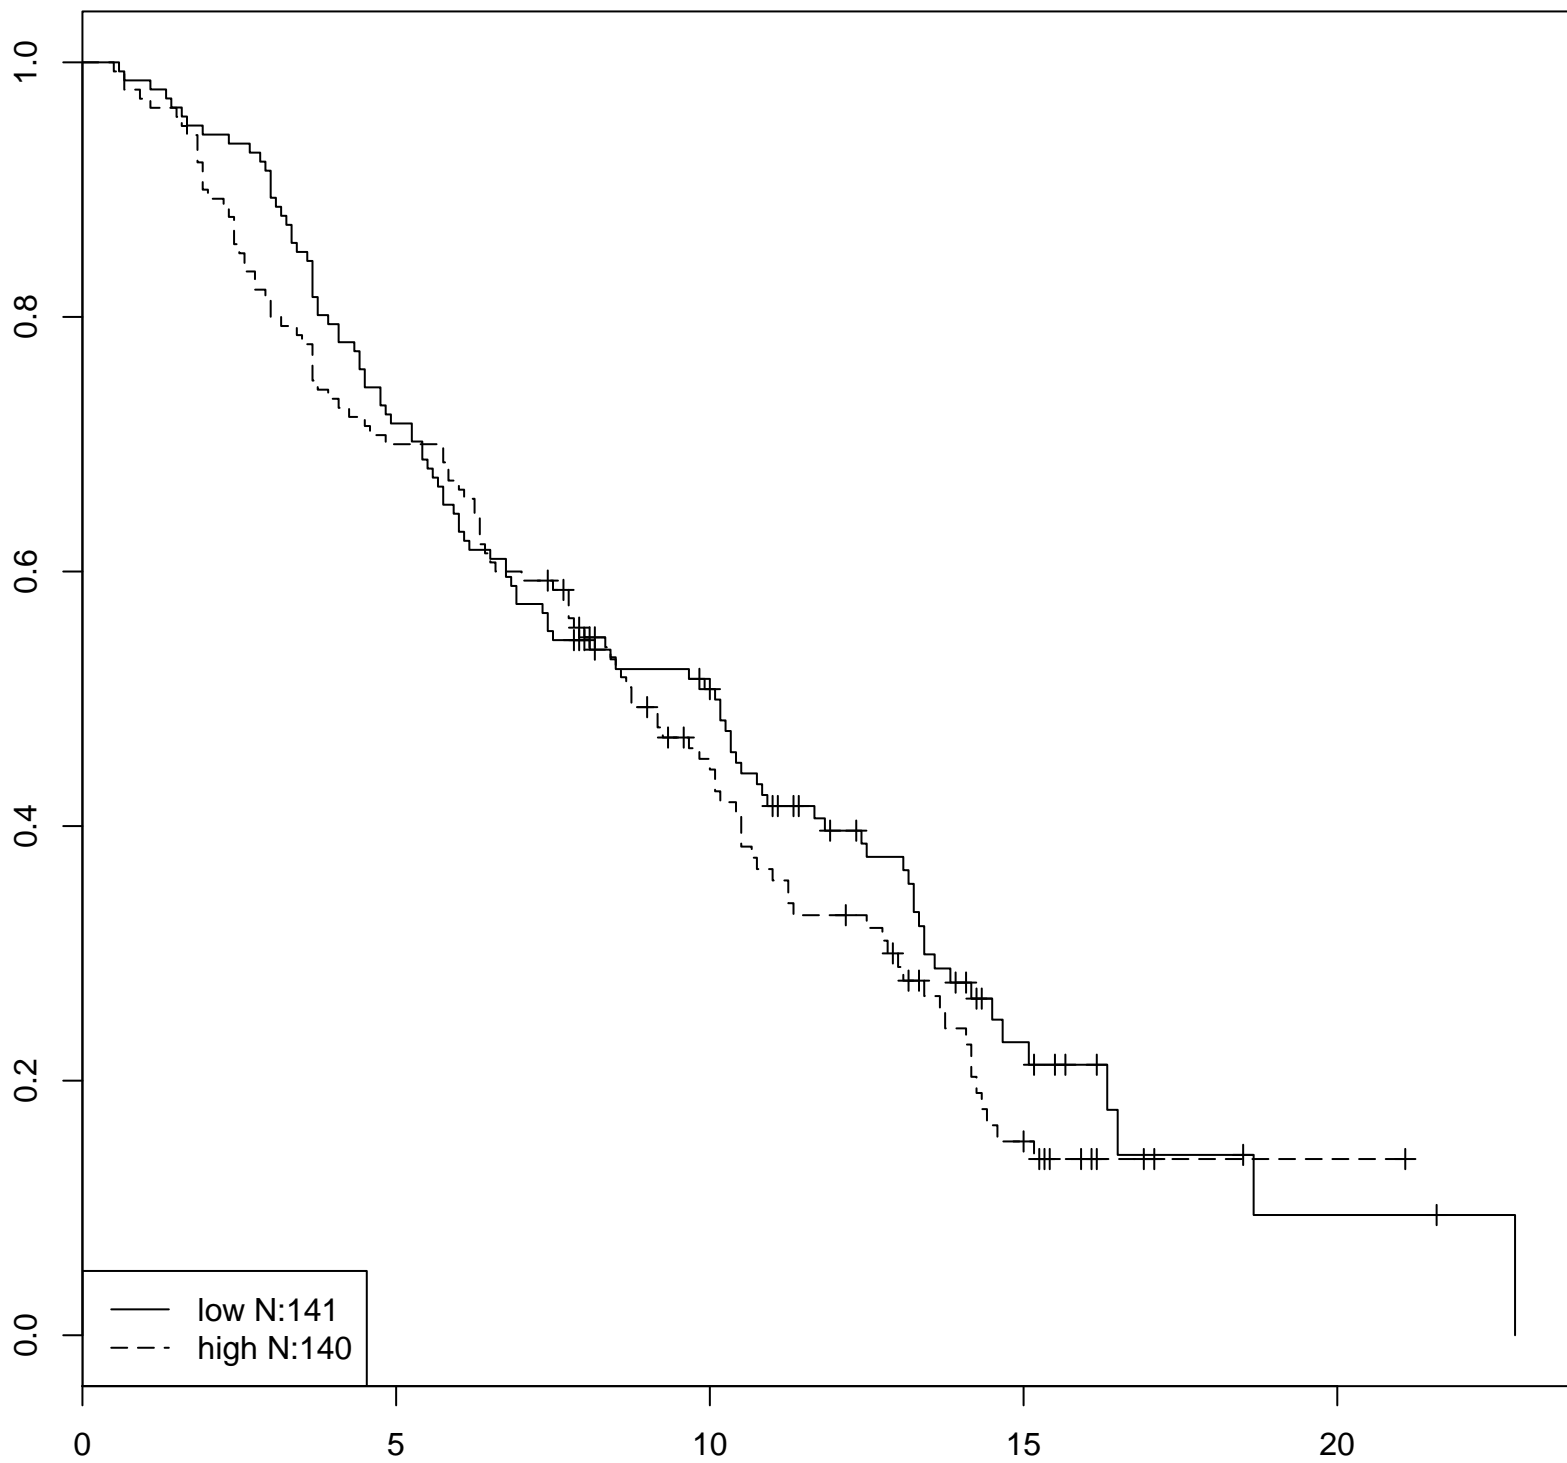



# Survival by MCM7 expression

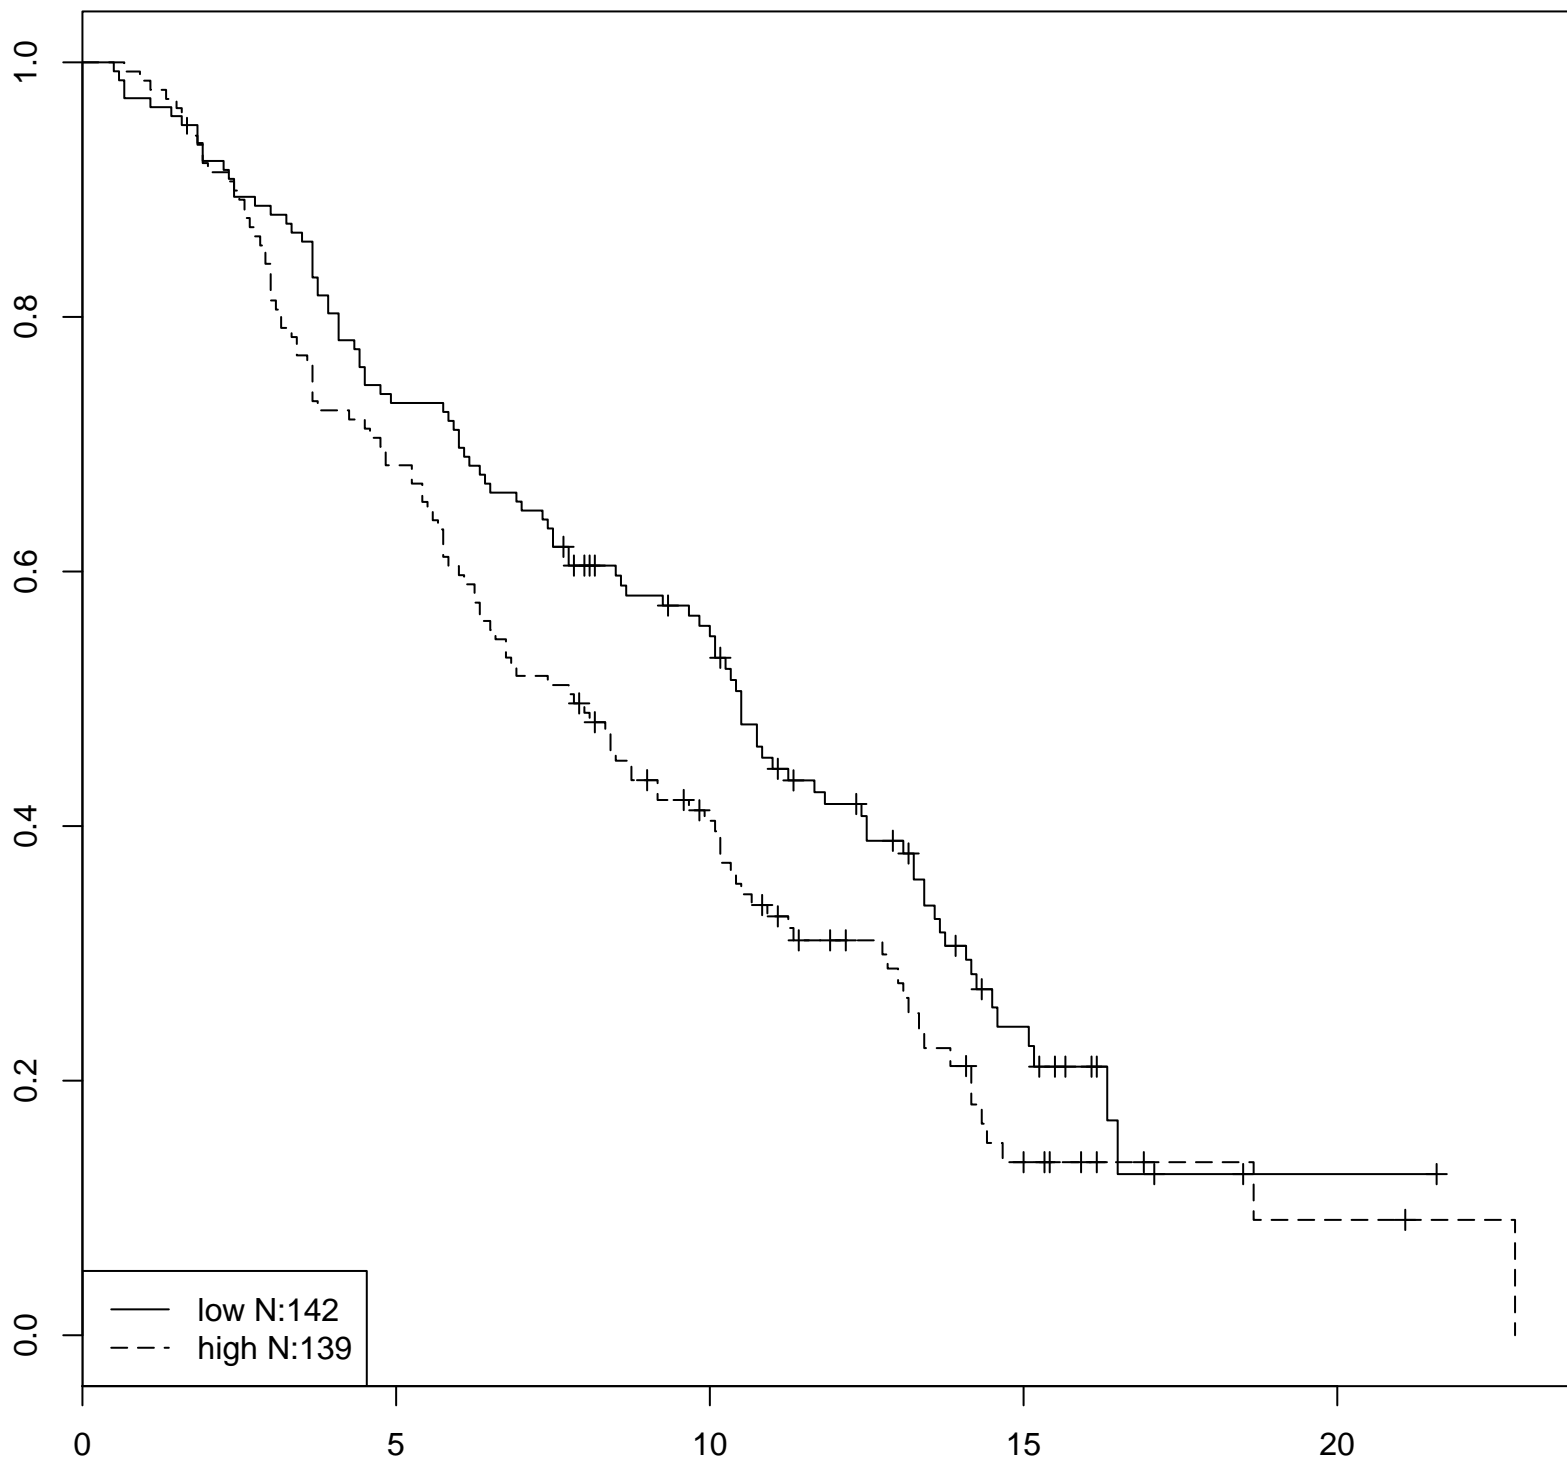

years  
log-rank test p-value = 0.03

# Survival by MGMT expression

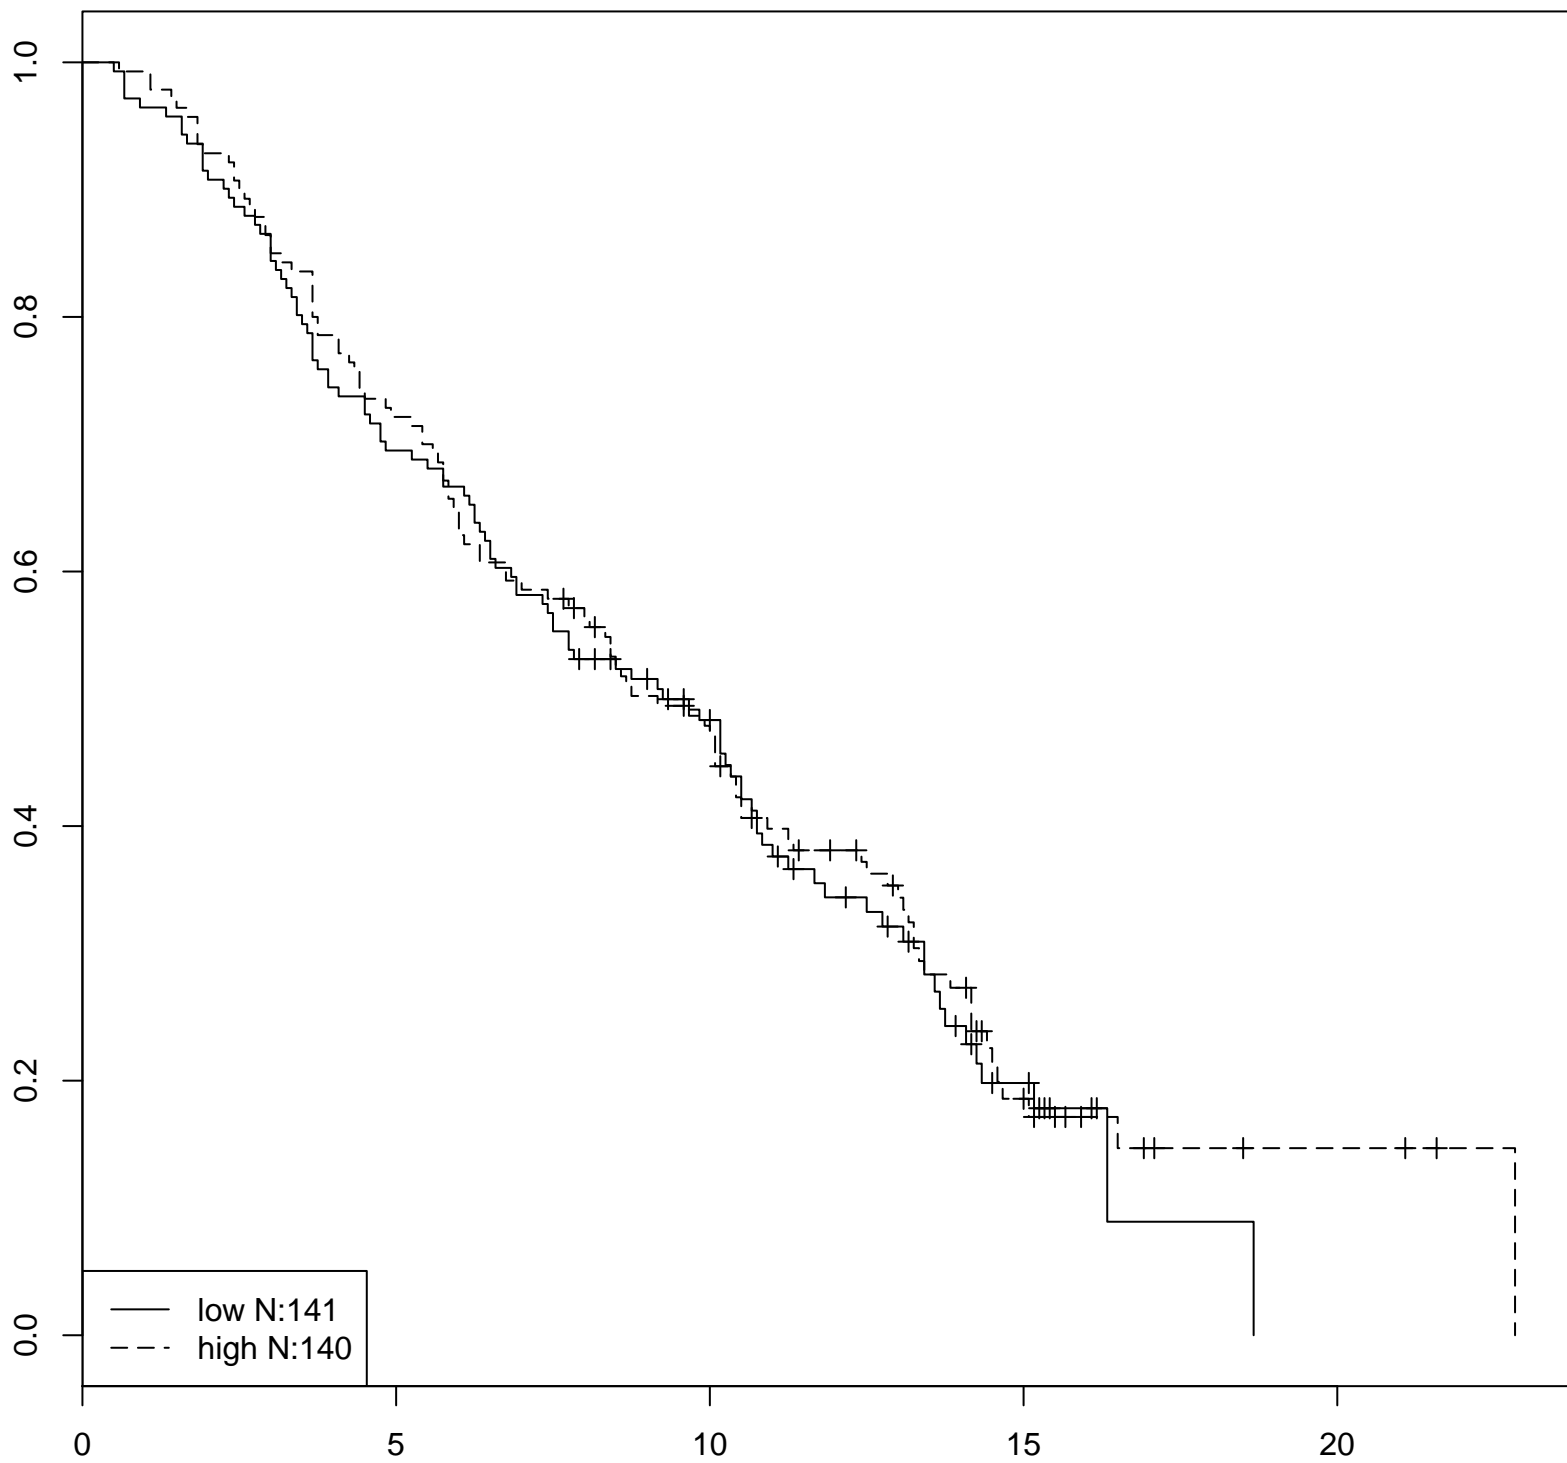

years

log-rank test p-value = 0.691

# Survival by MICAL2 expression

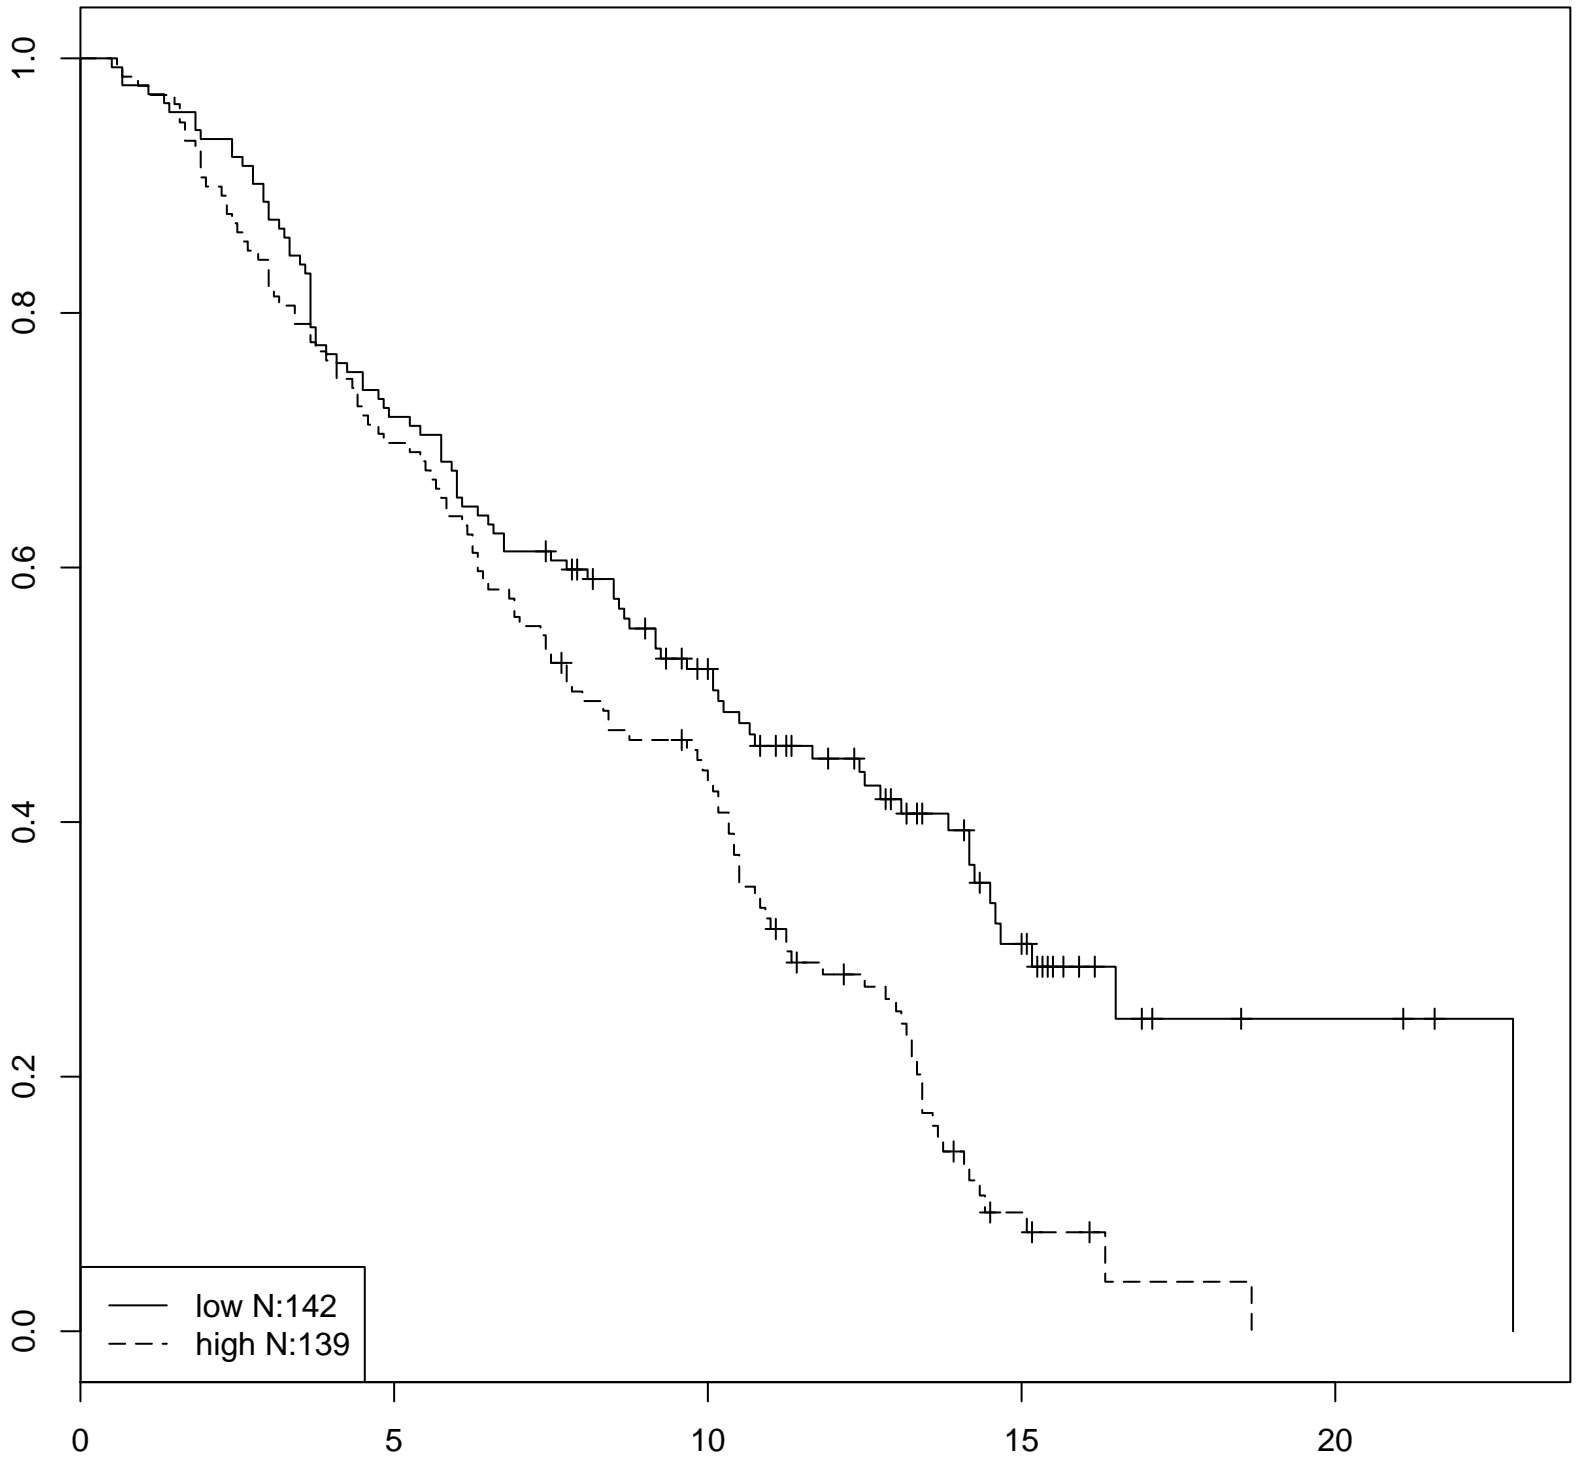

years  
log-rank test p-value = 0

# Survival by MIF expression

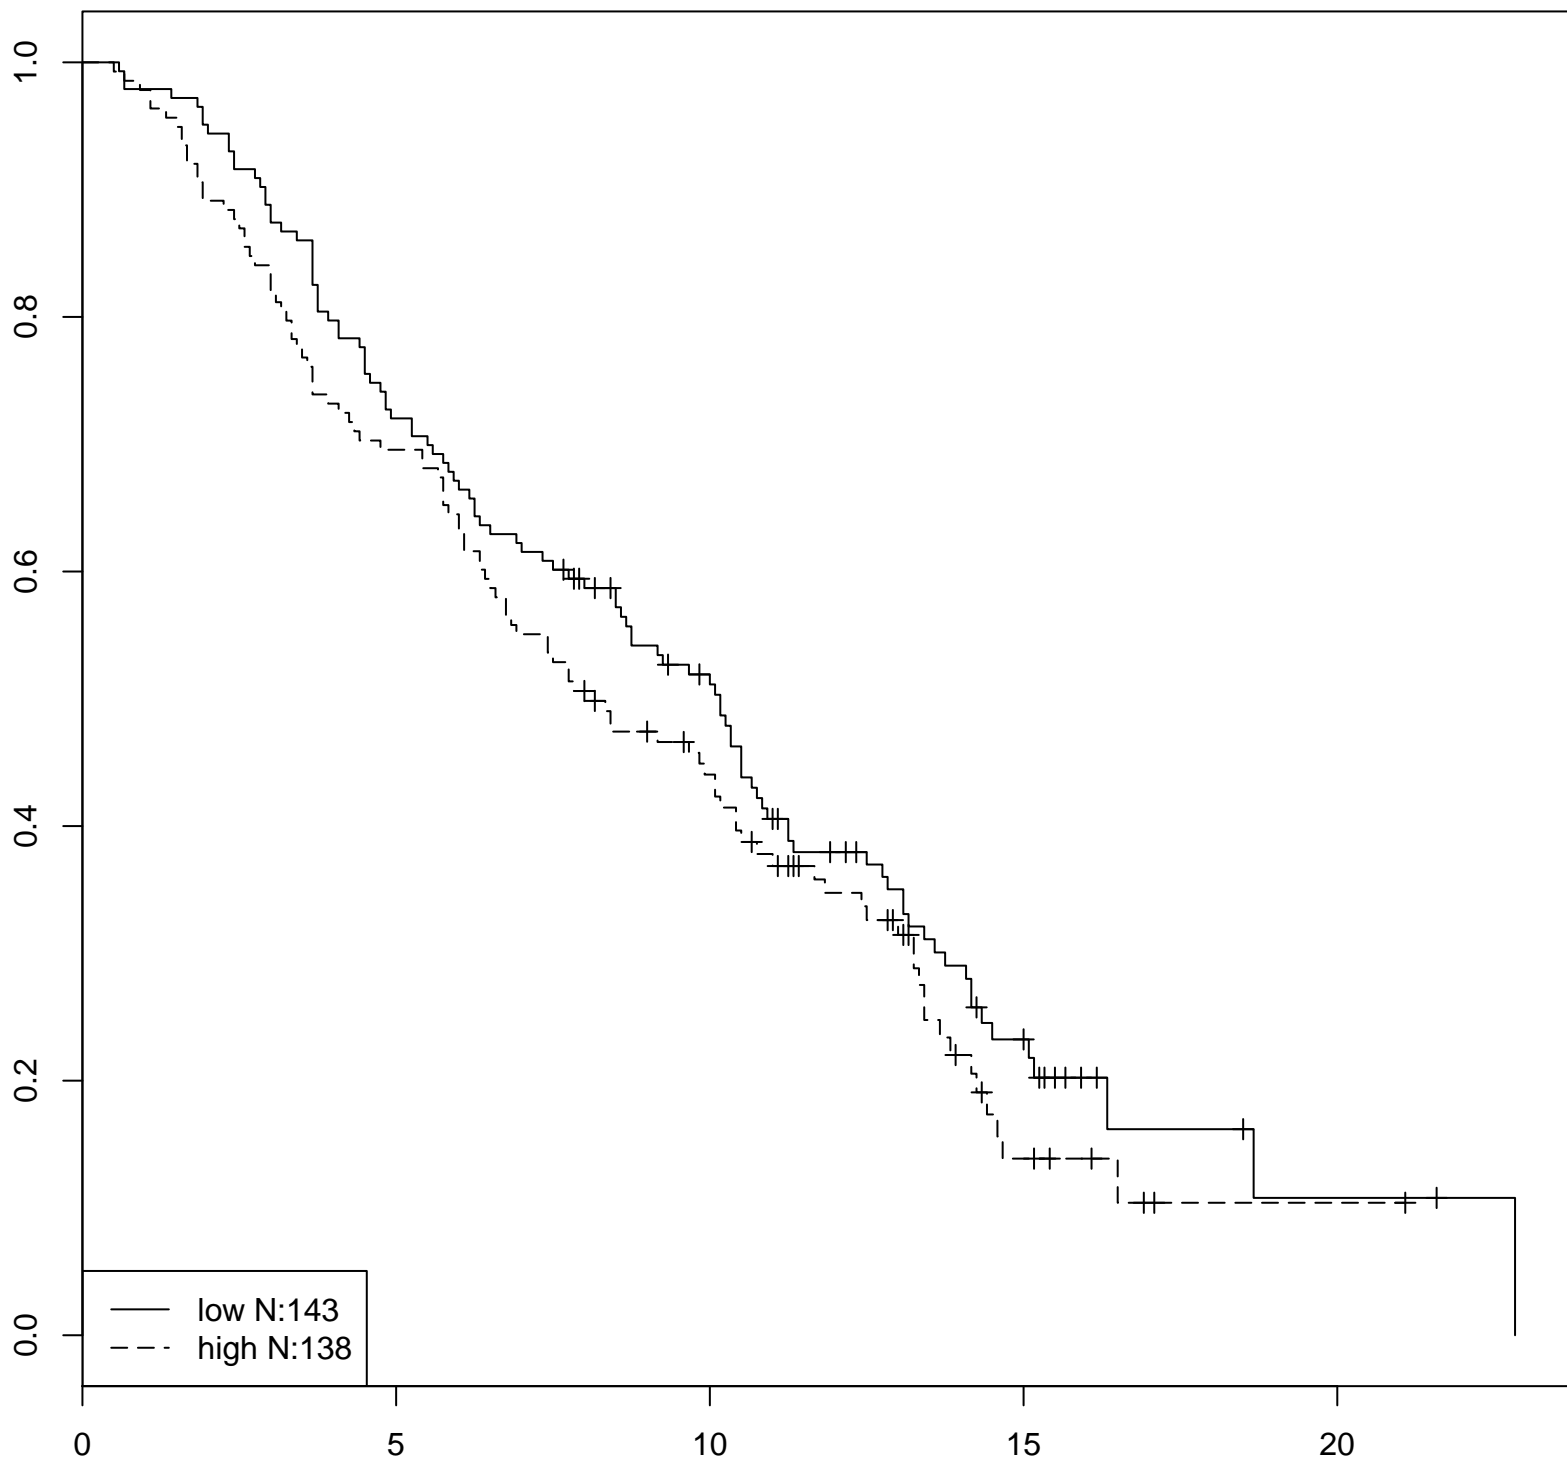

years

log-rank test p-value = 0.205

# Survival by MKI67 expression

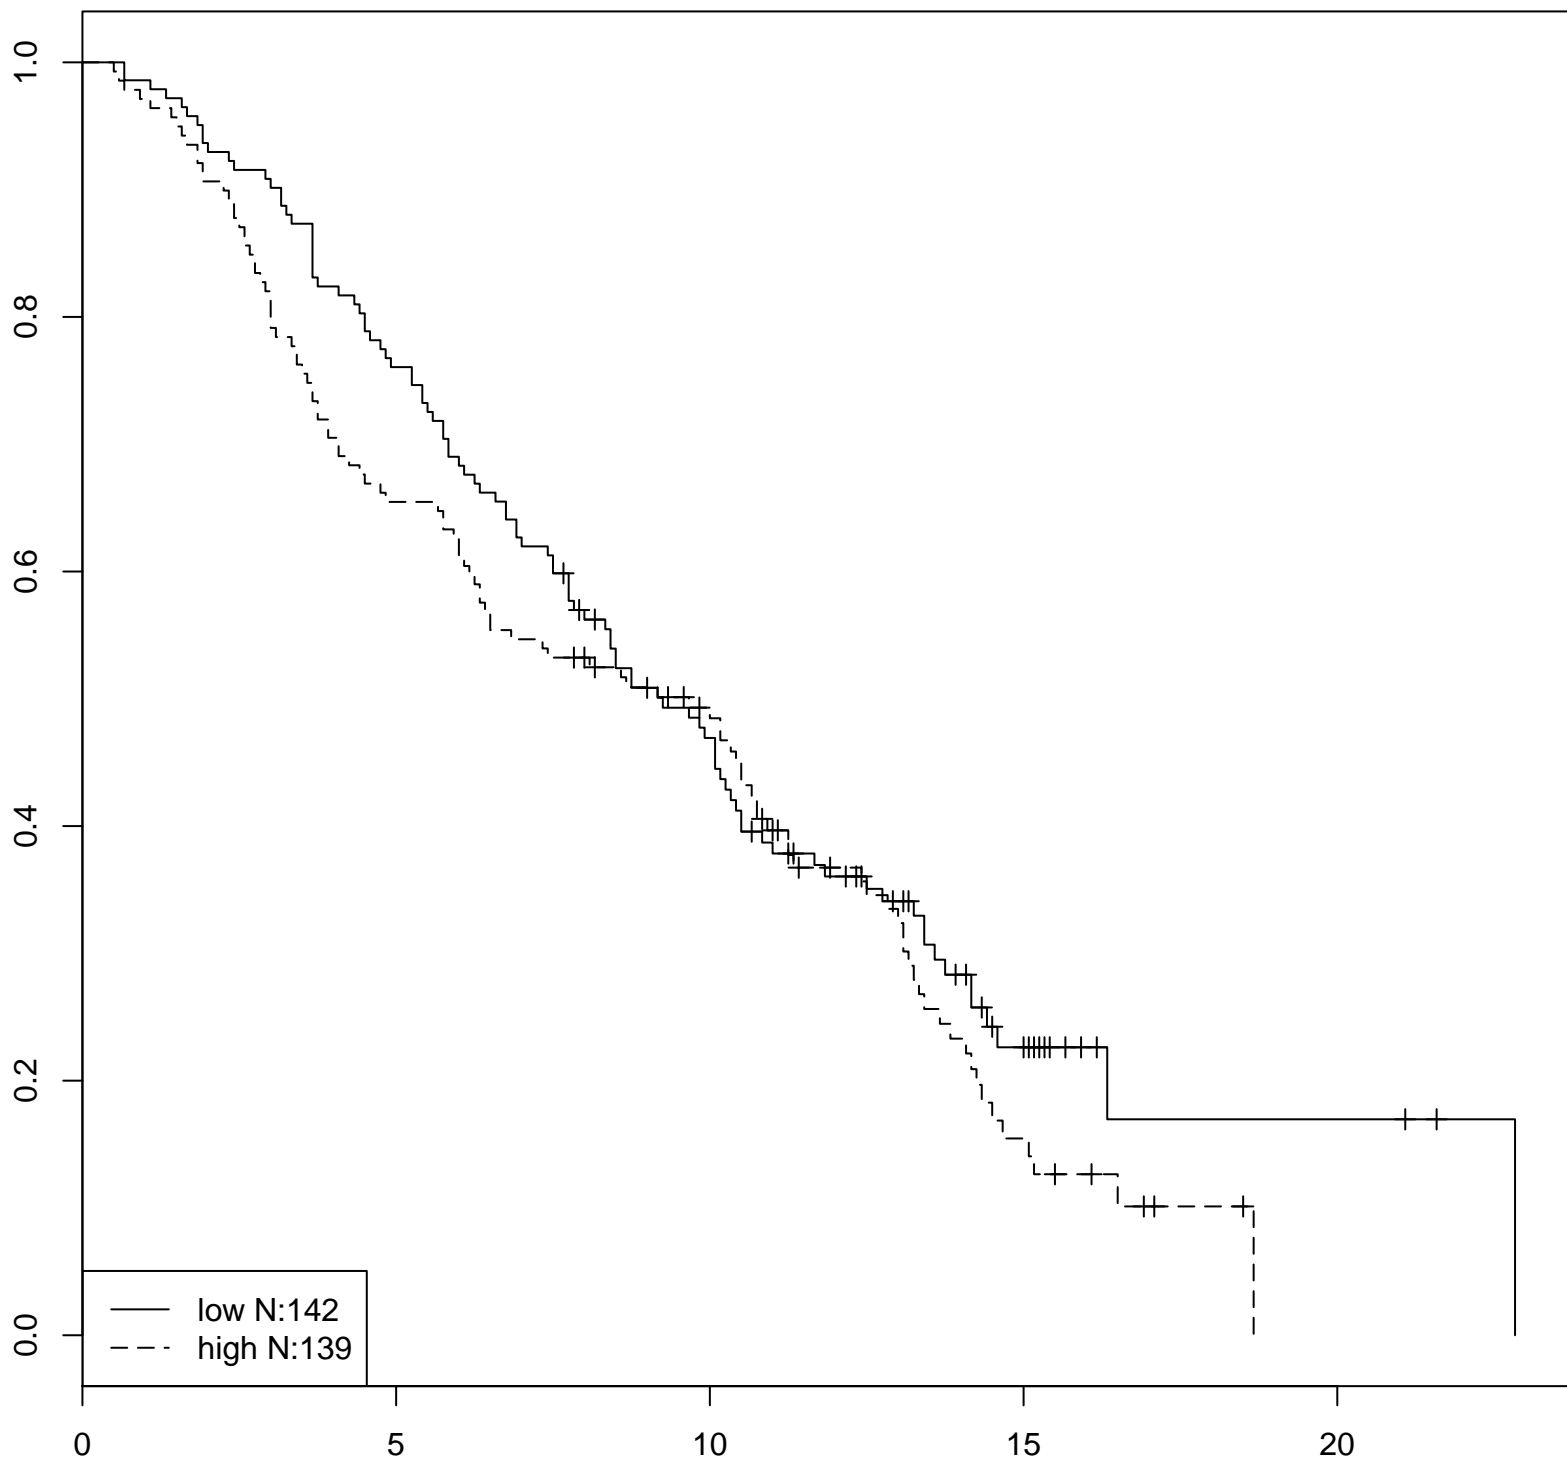

# Survival by MMP13 expression

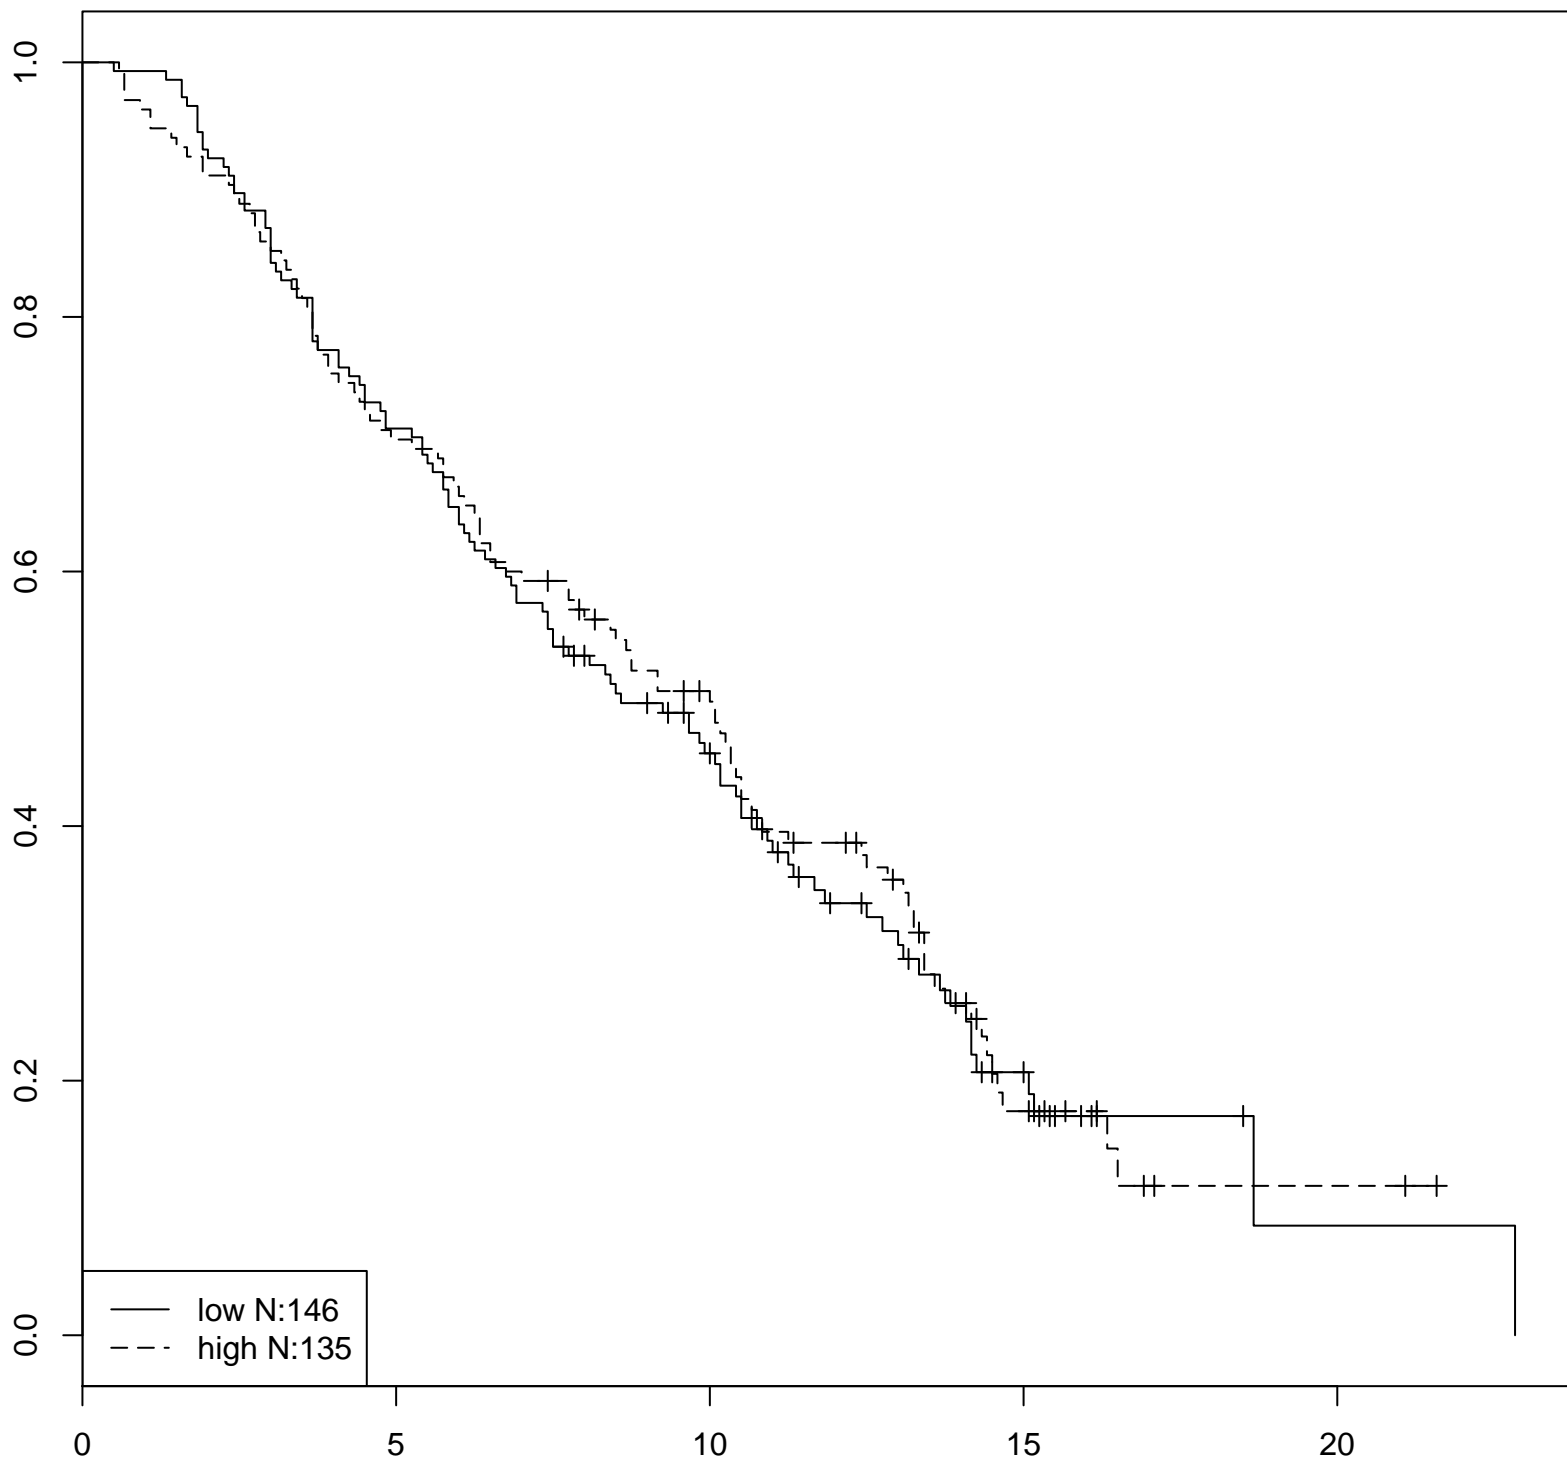

# Survival by MMP2 expression

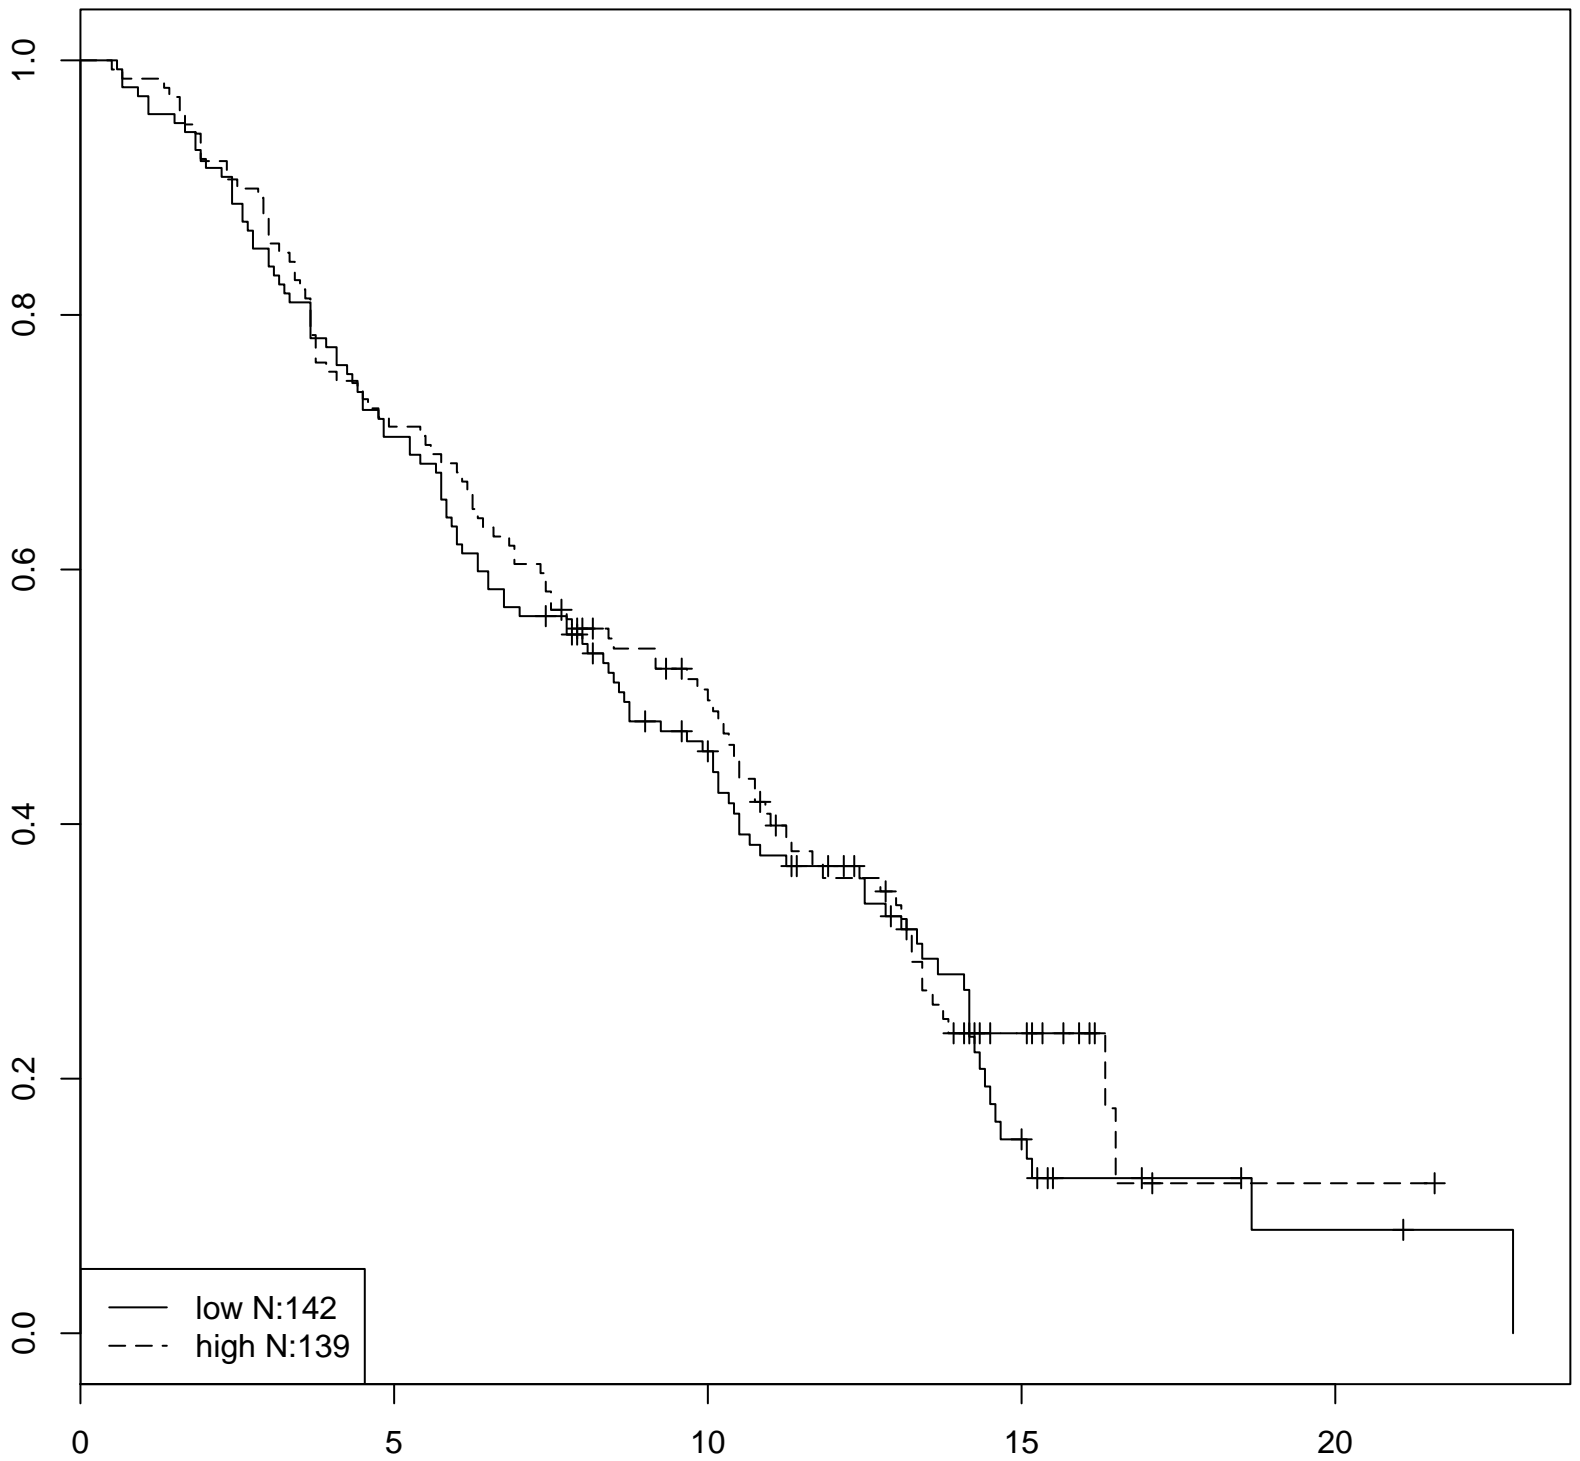

years

log-rank test p-value = 0.464

# Survival by MMP7 expression

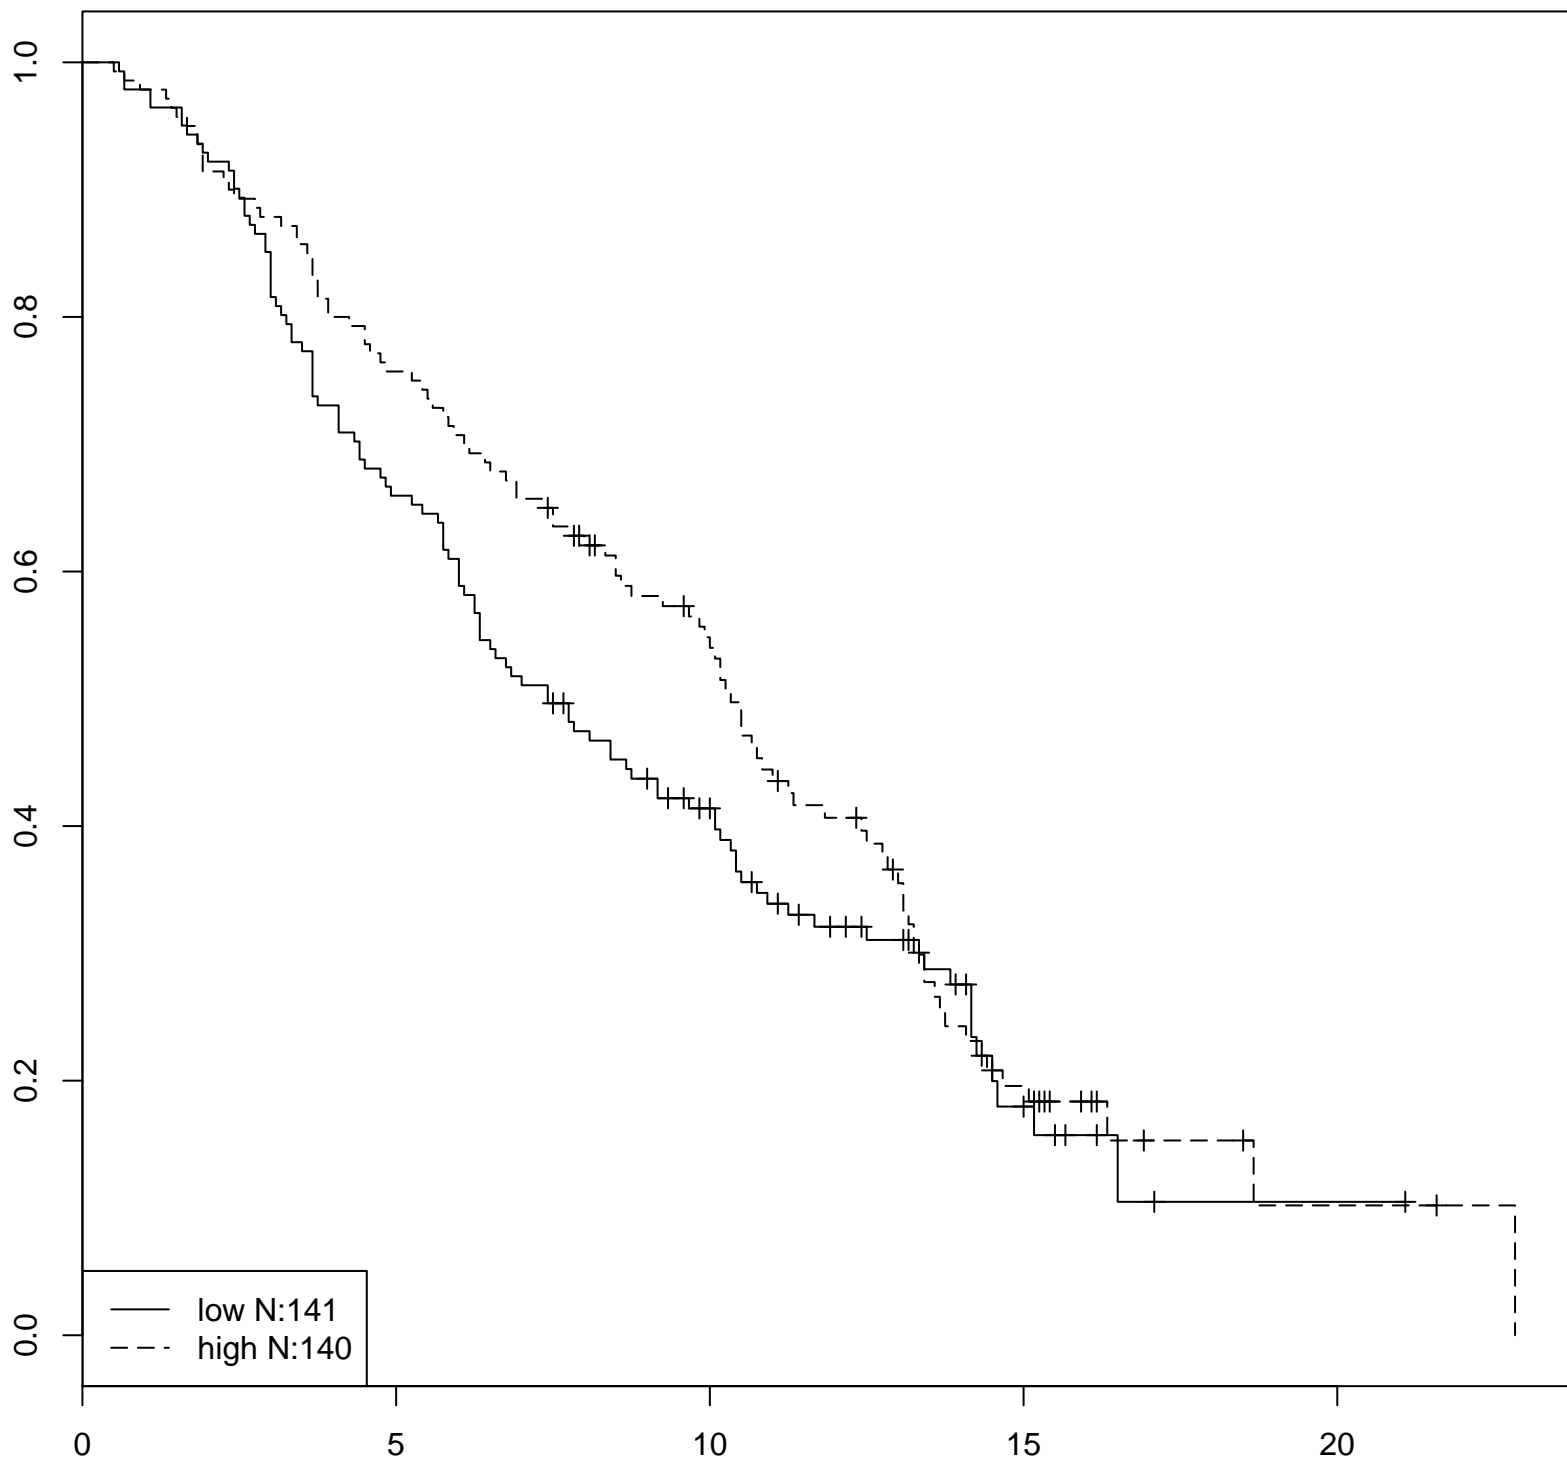



# Survival by MMP9 expression

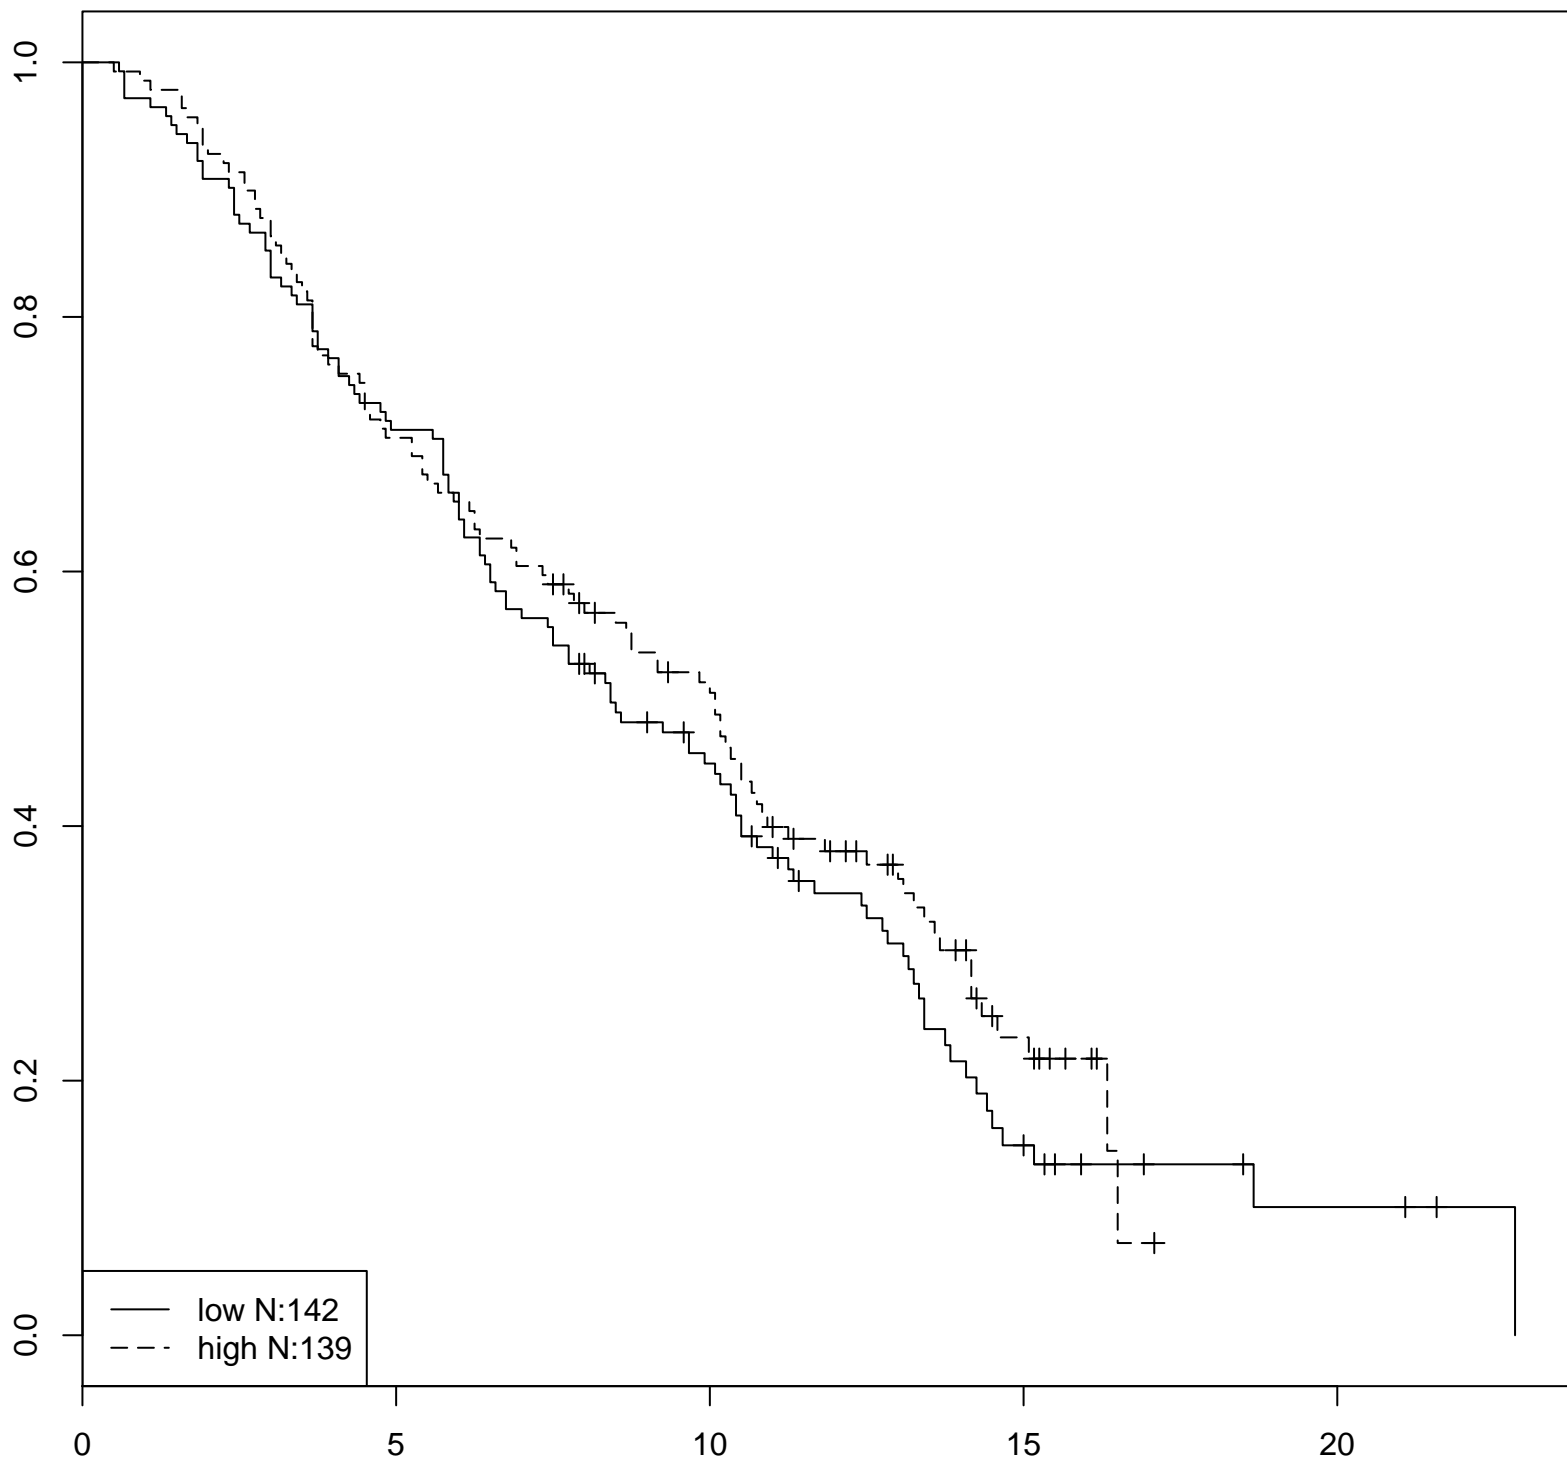

# Survival by MSH2 expression

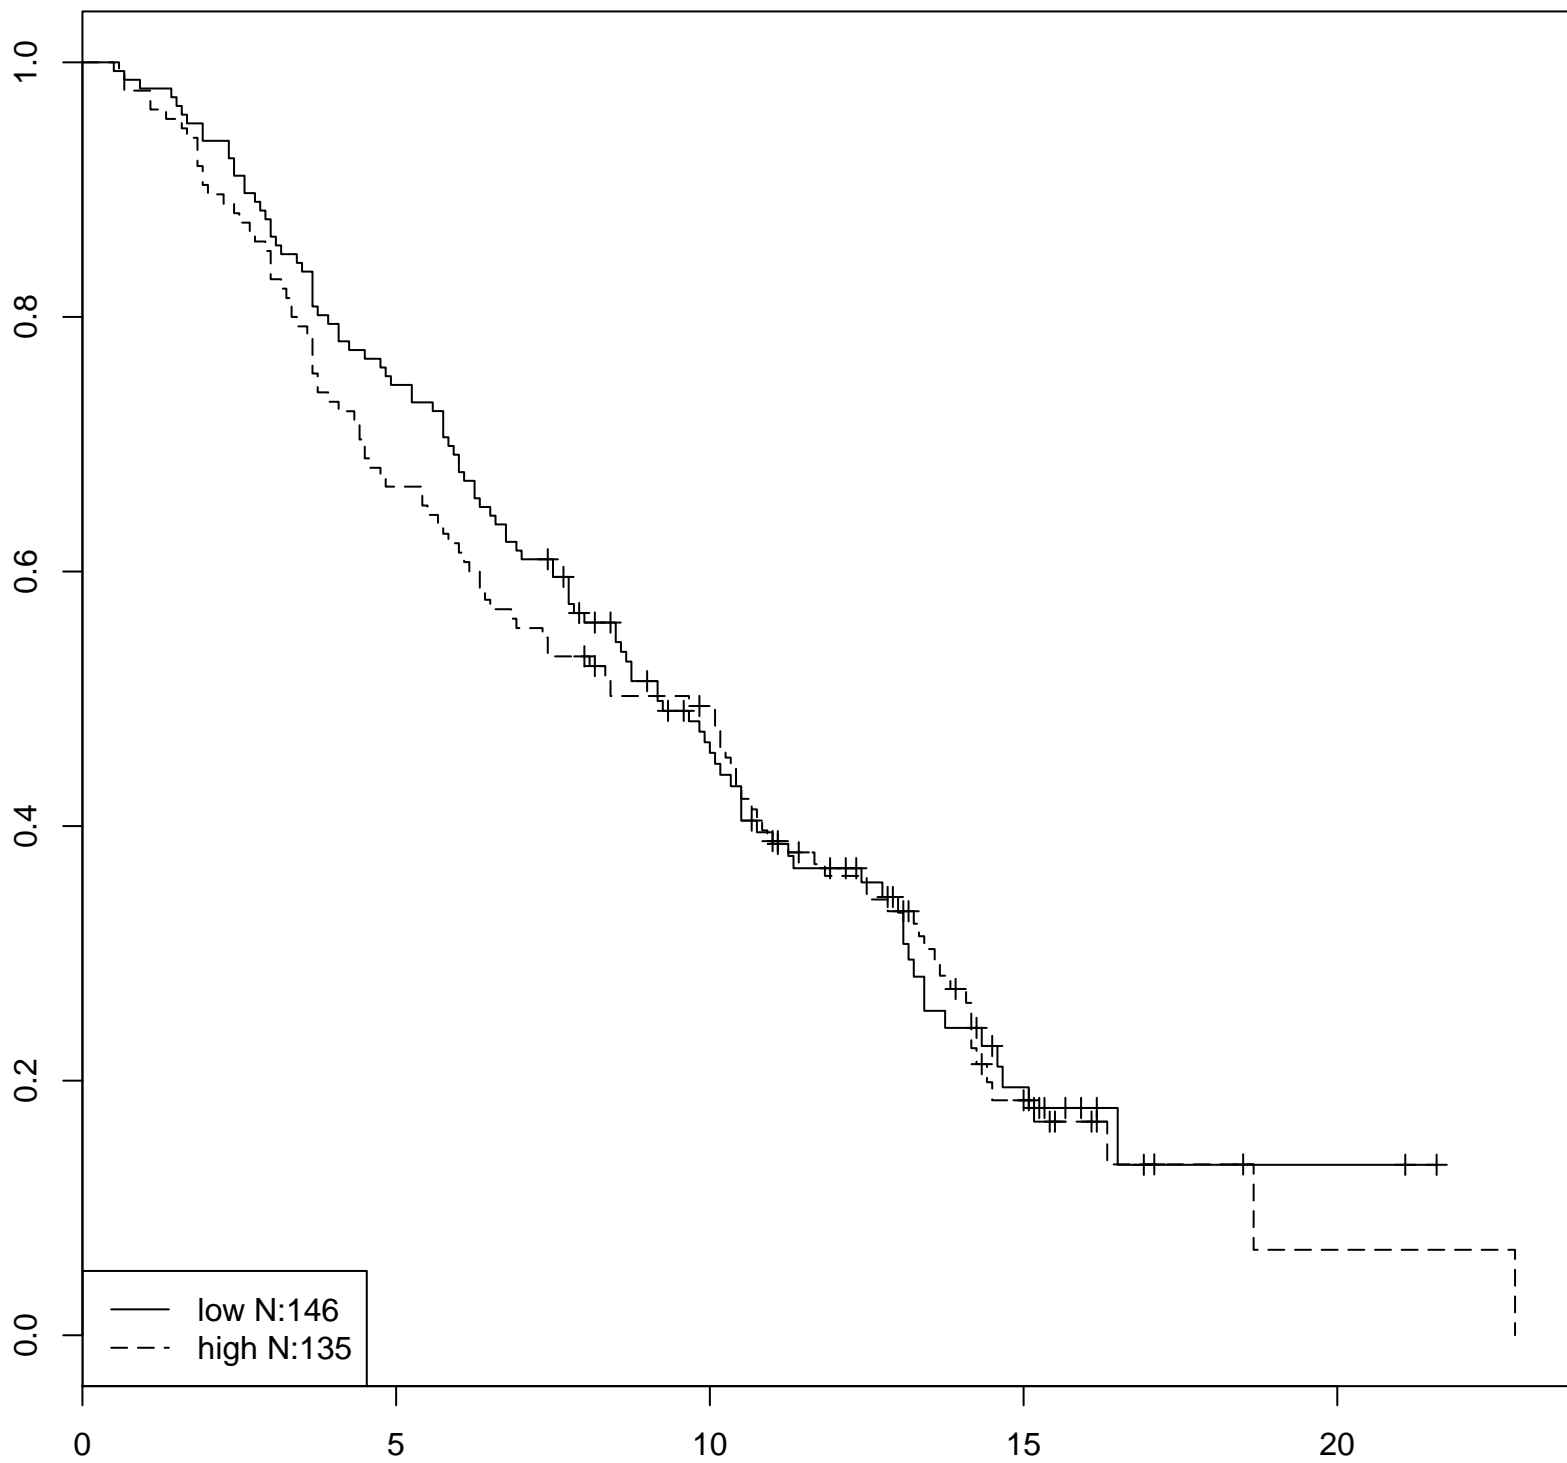

years

log-rank test p-value = 0.696

# Survival by MSMB expression

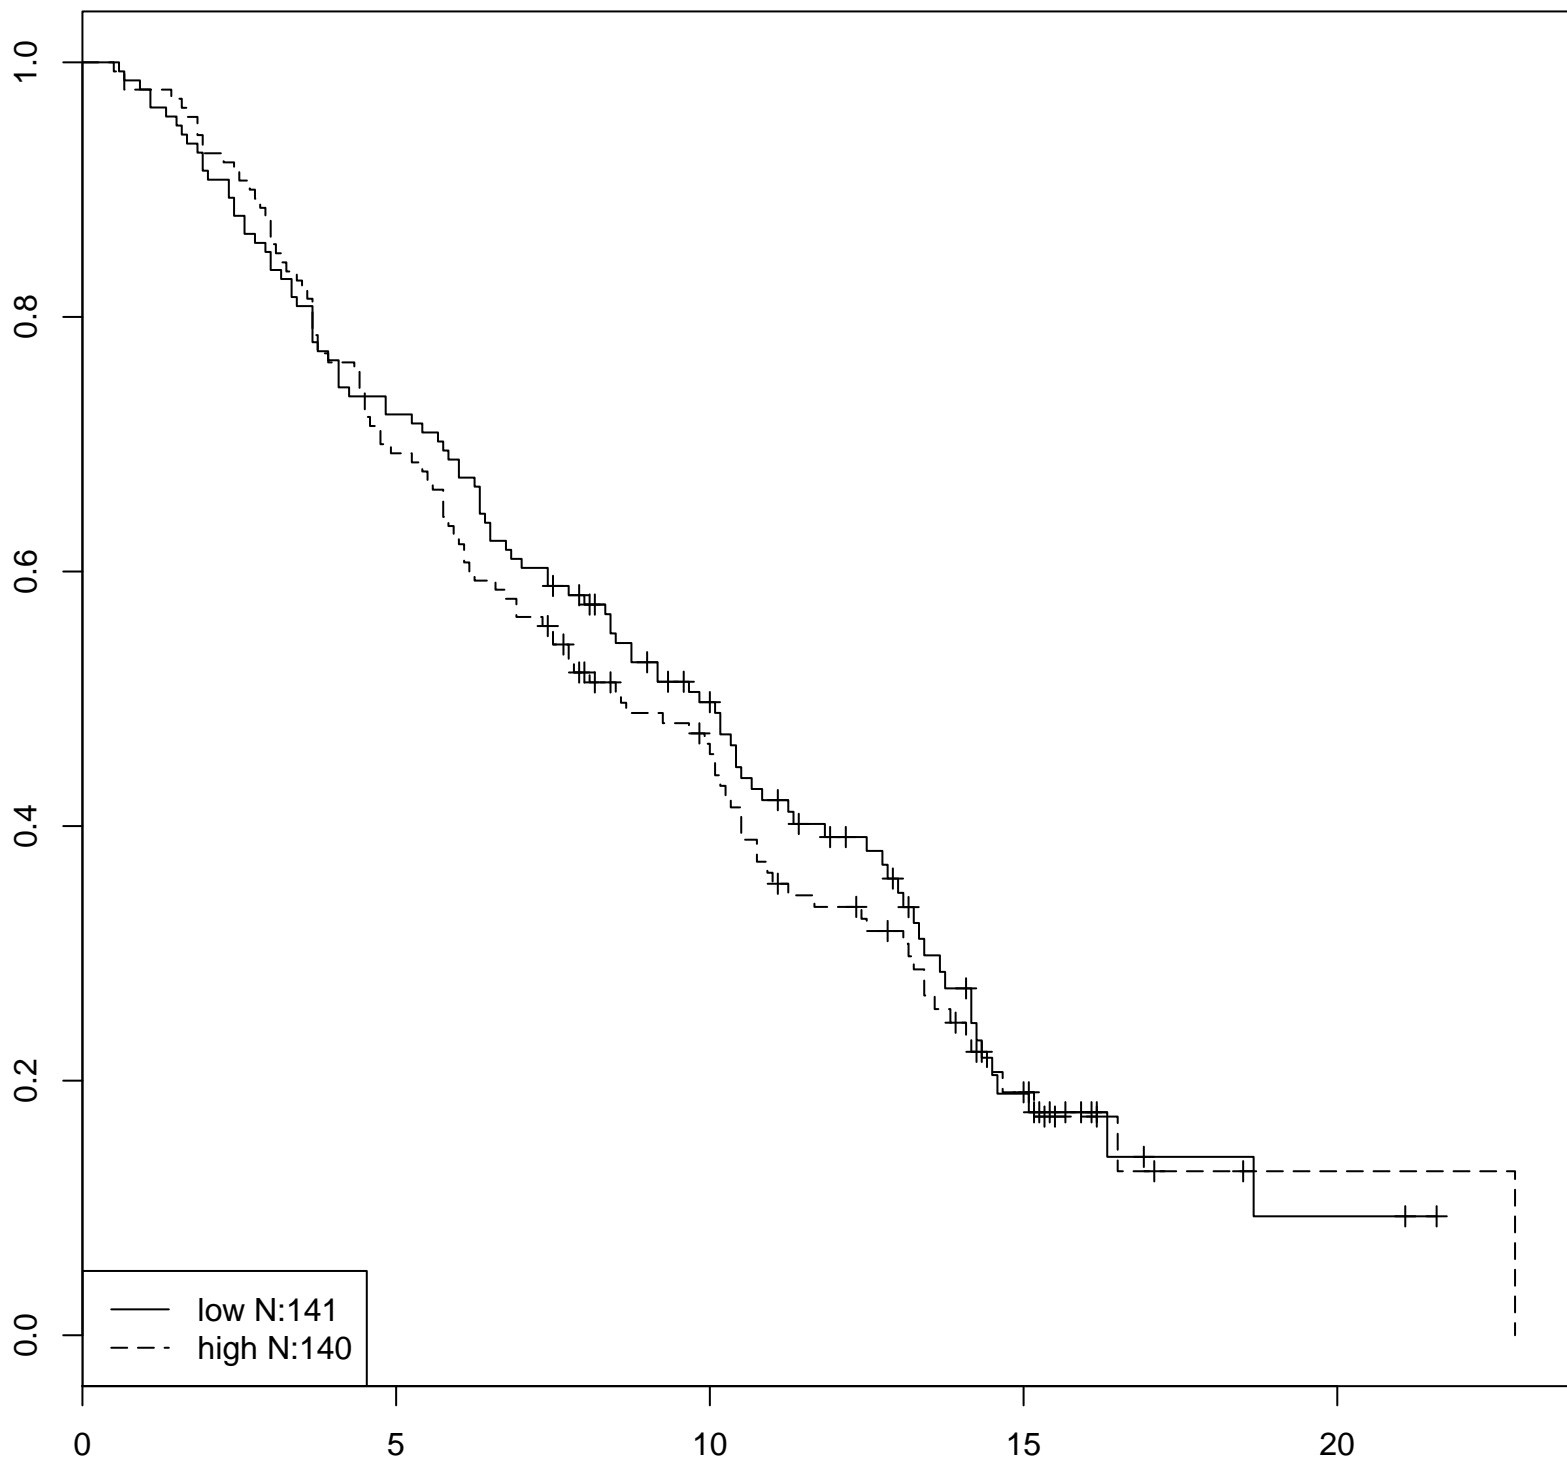

# Survival by MT1A expression

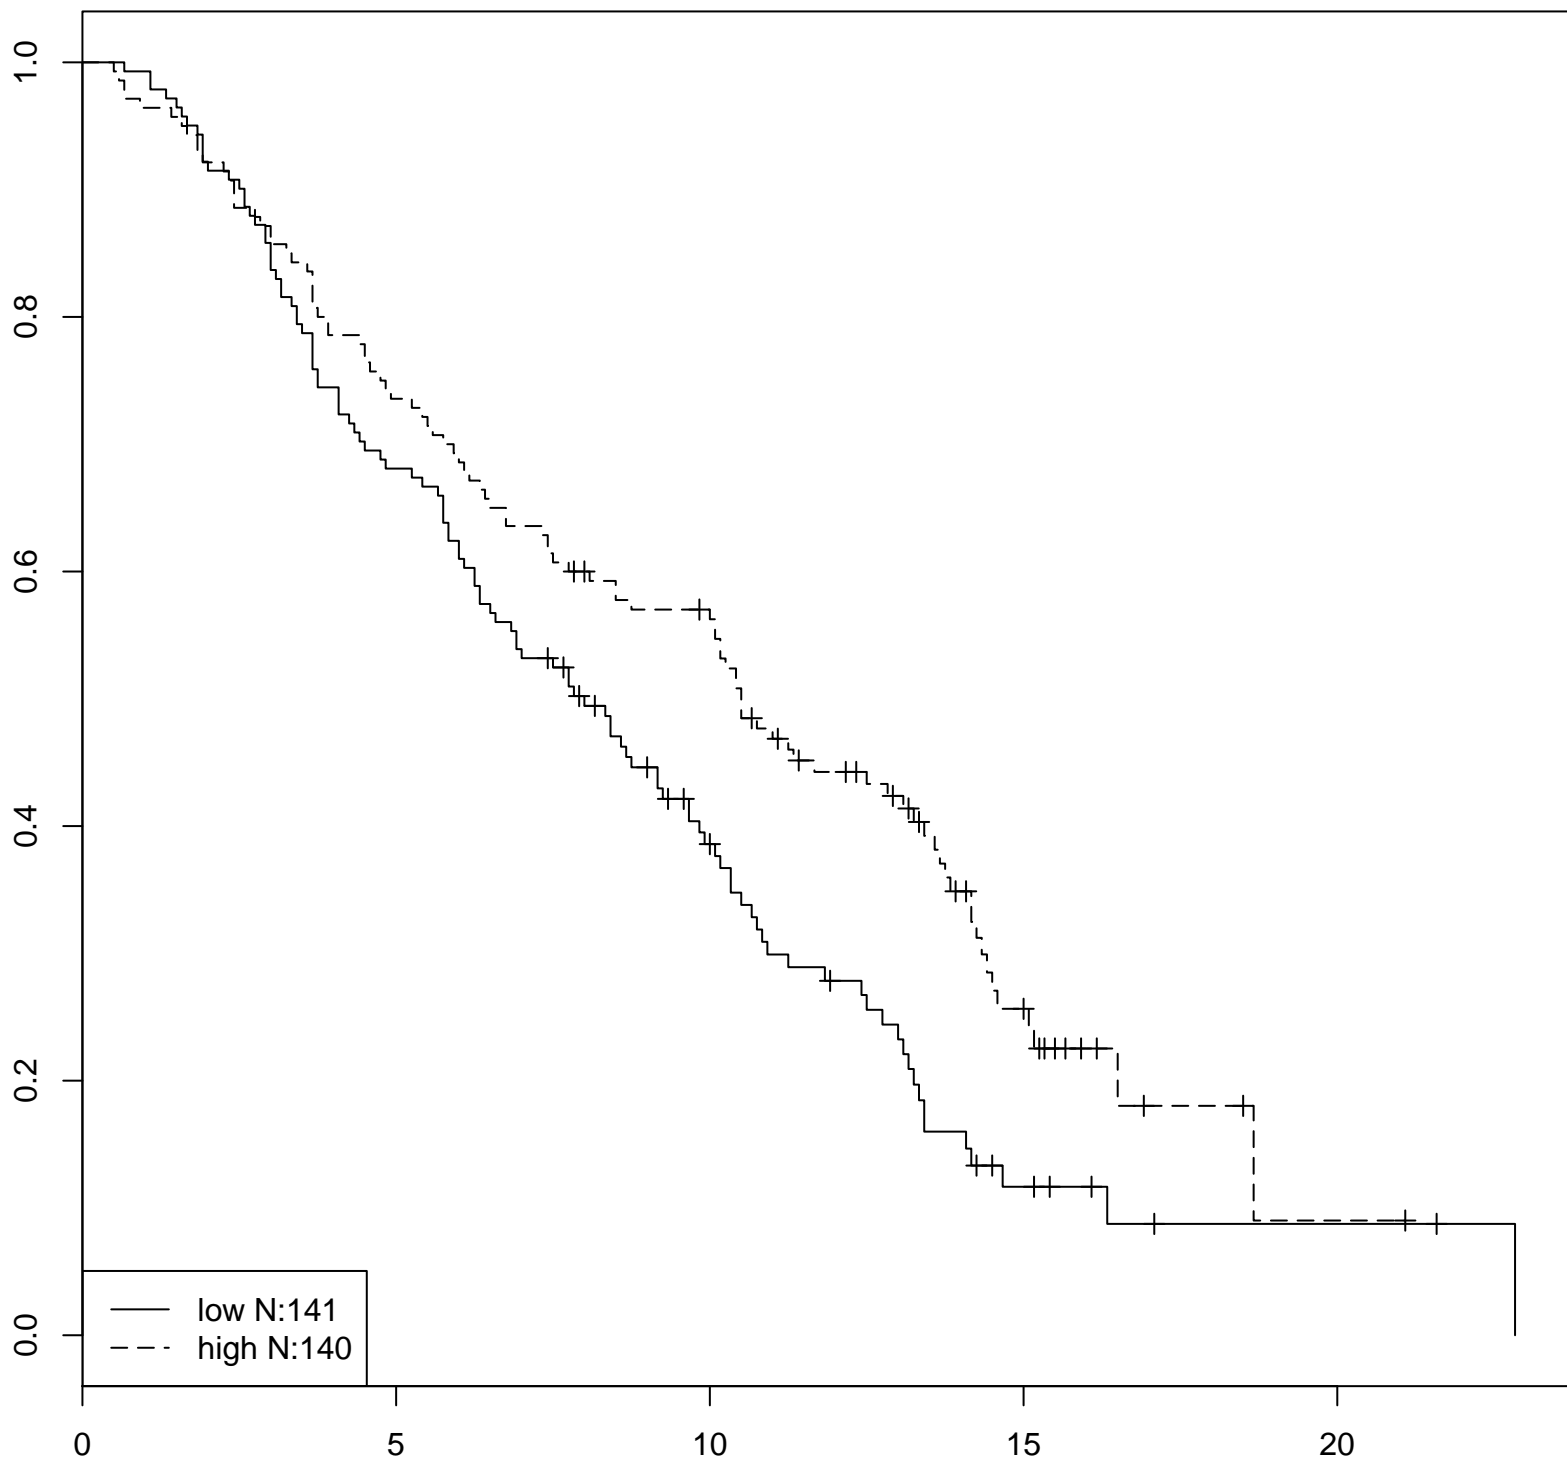

years

log-rank test p-value = 0.004

# Survival by MT1G expression

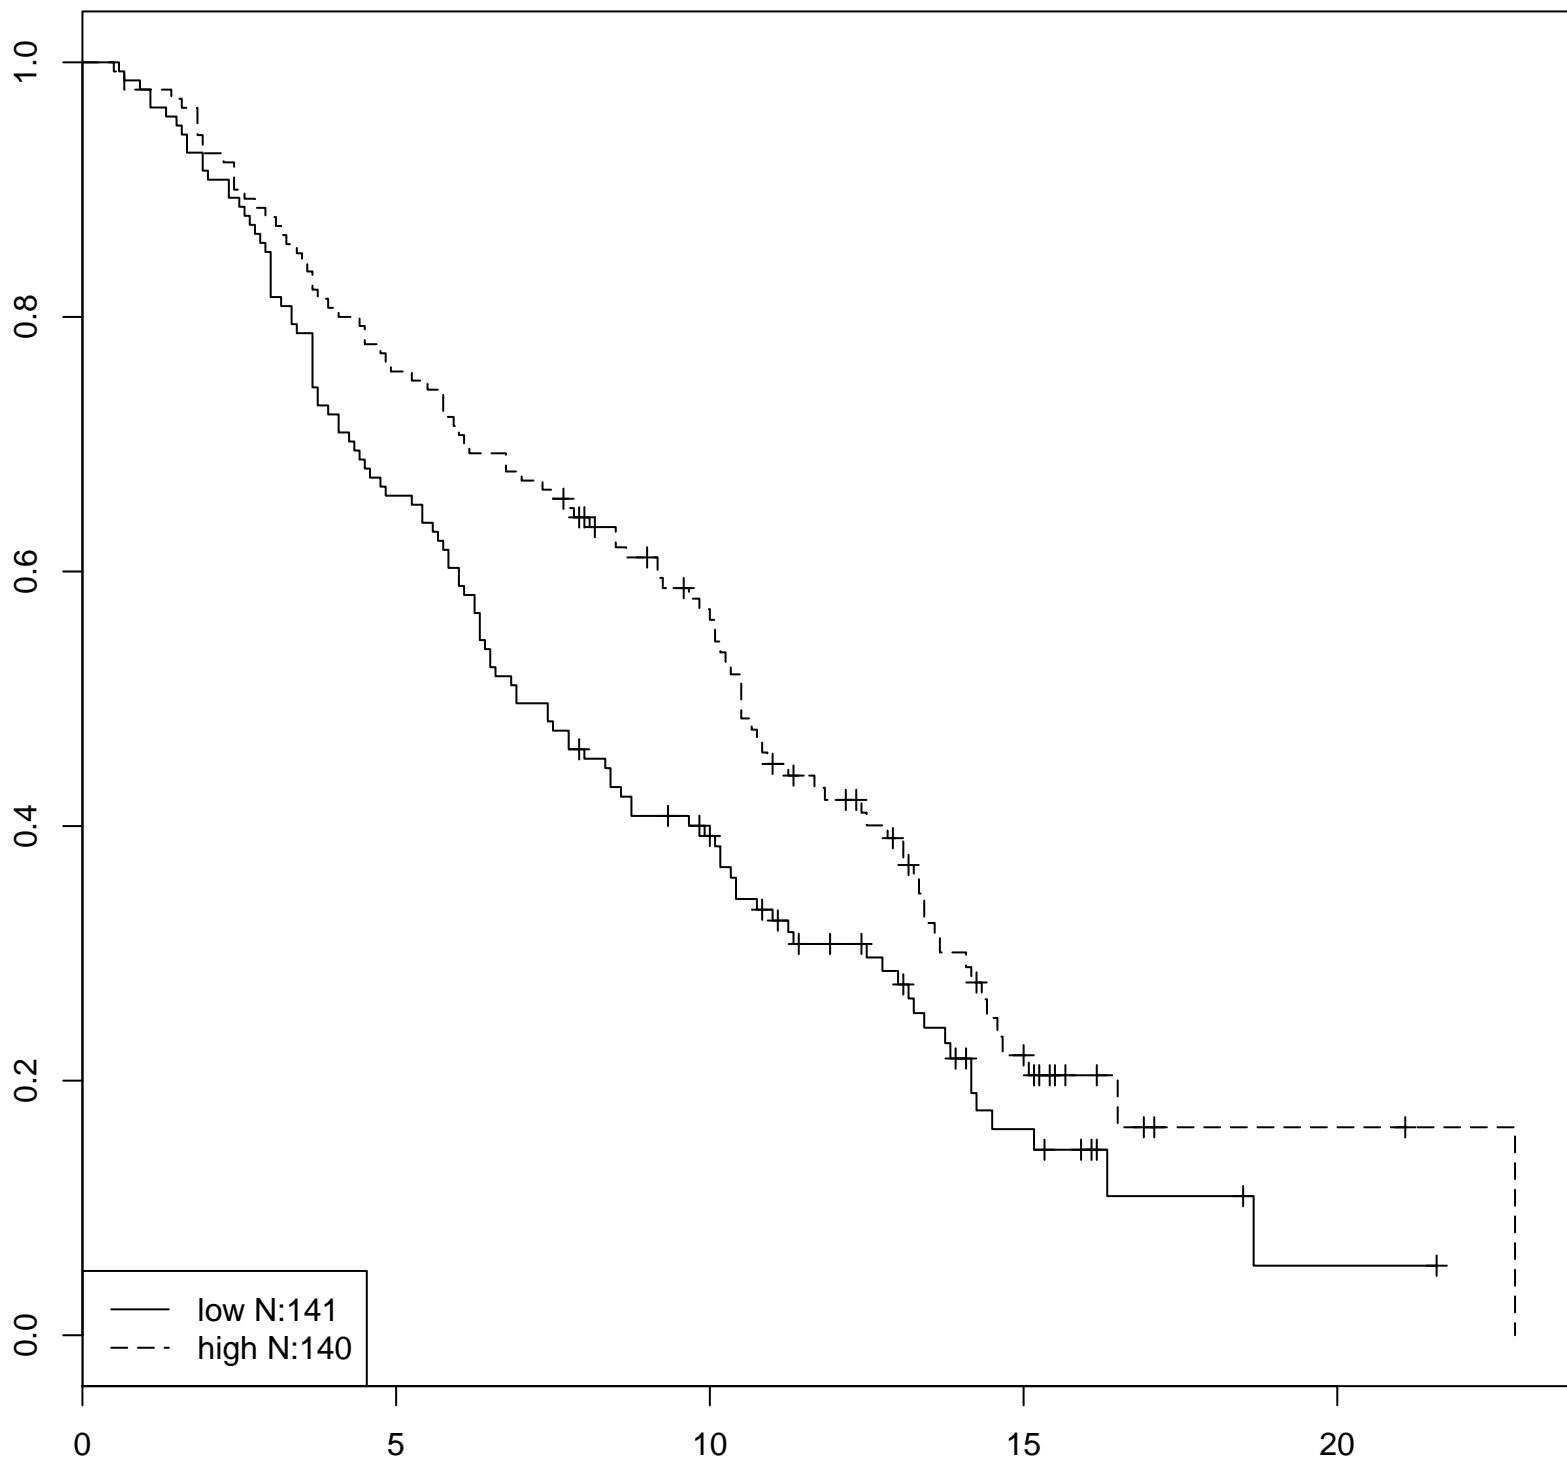

years

log-rank test p-value = 0.014

# Survival by MT2A expression

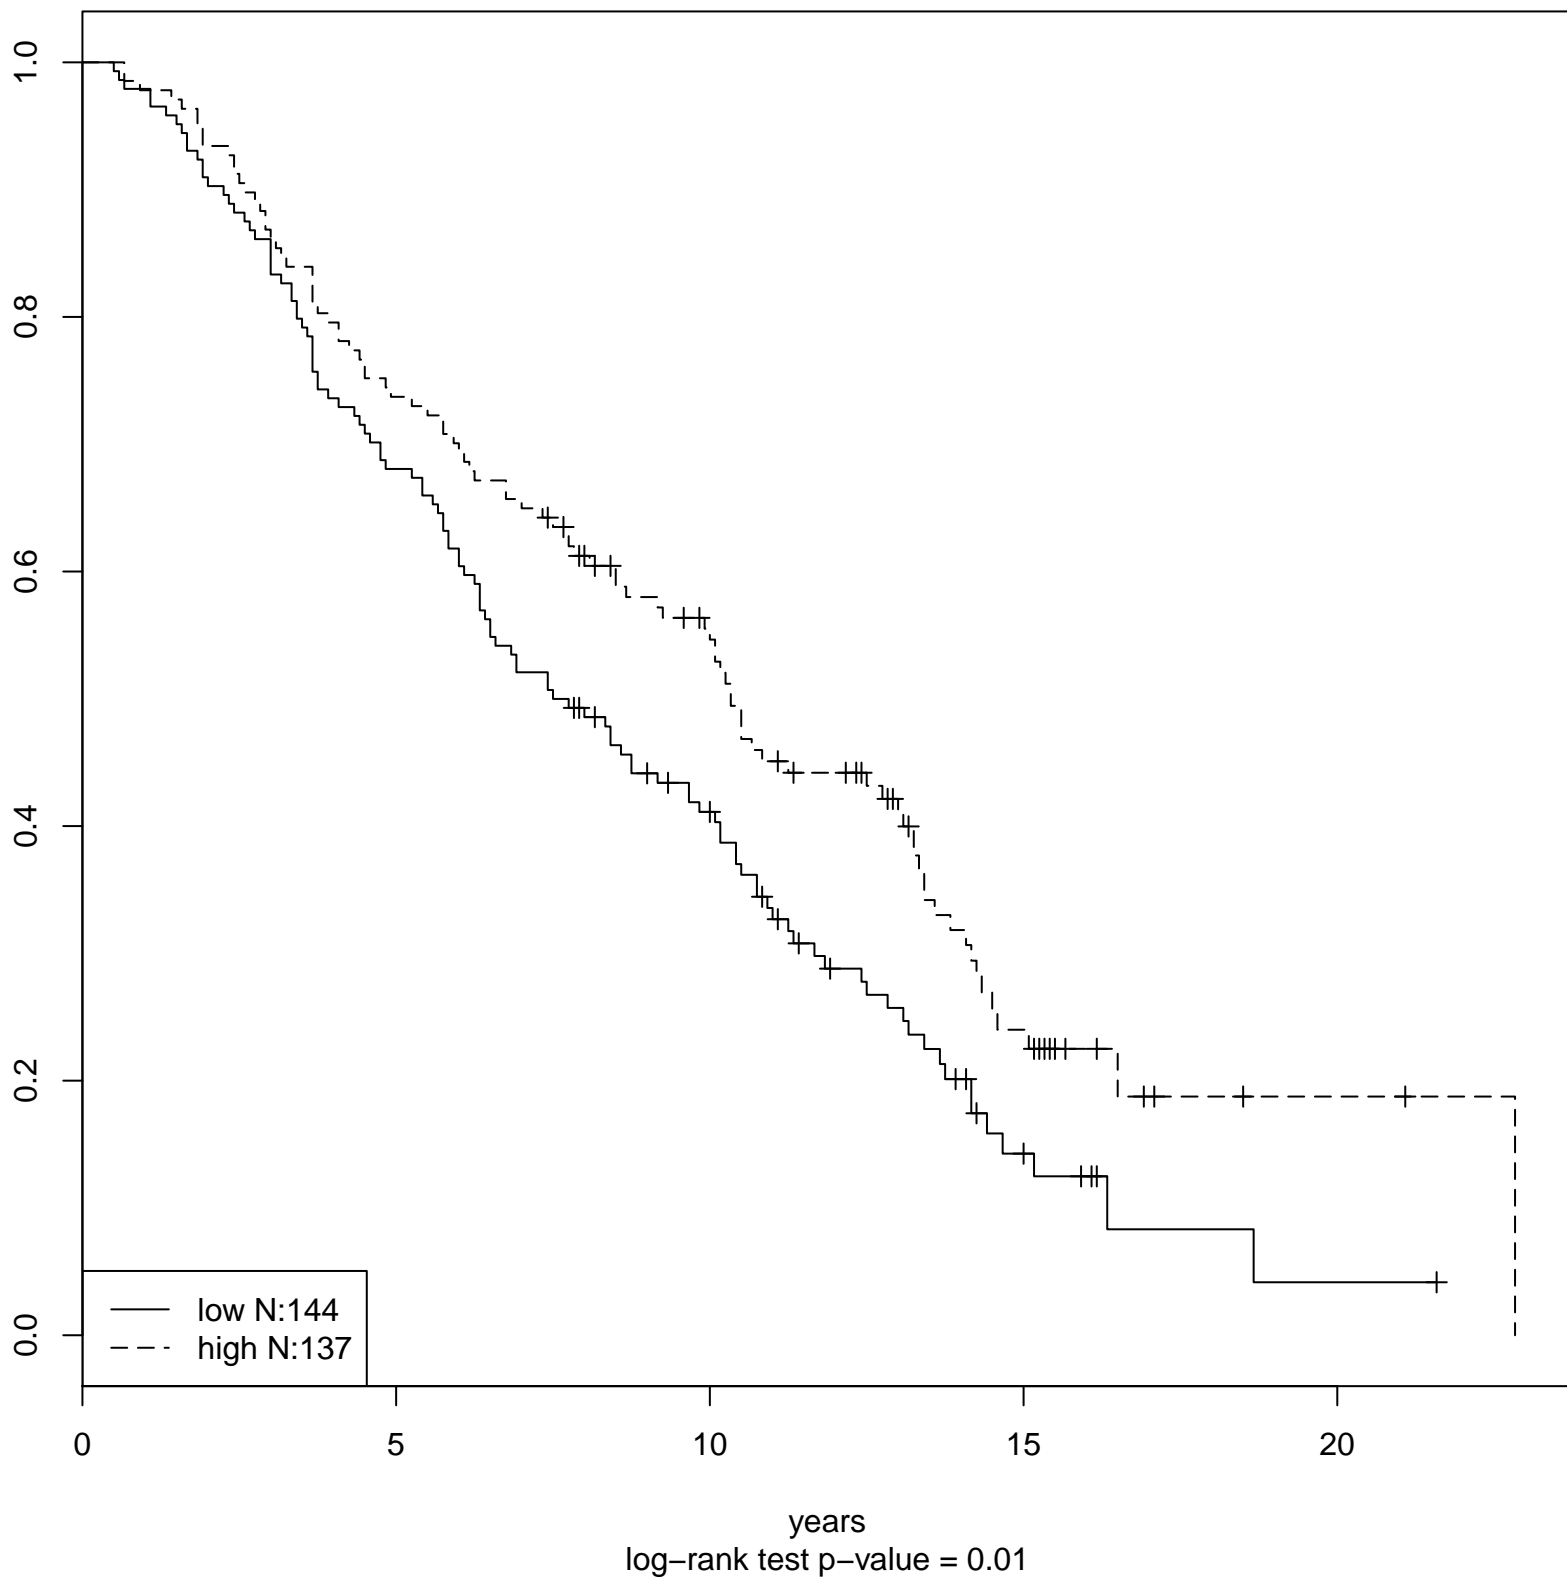

# Survival by MTA1 expression

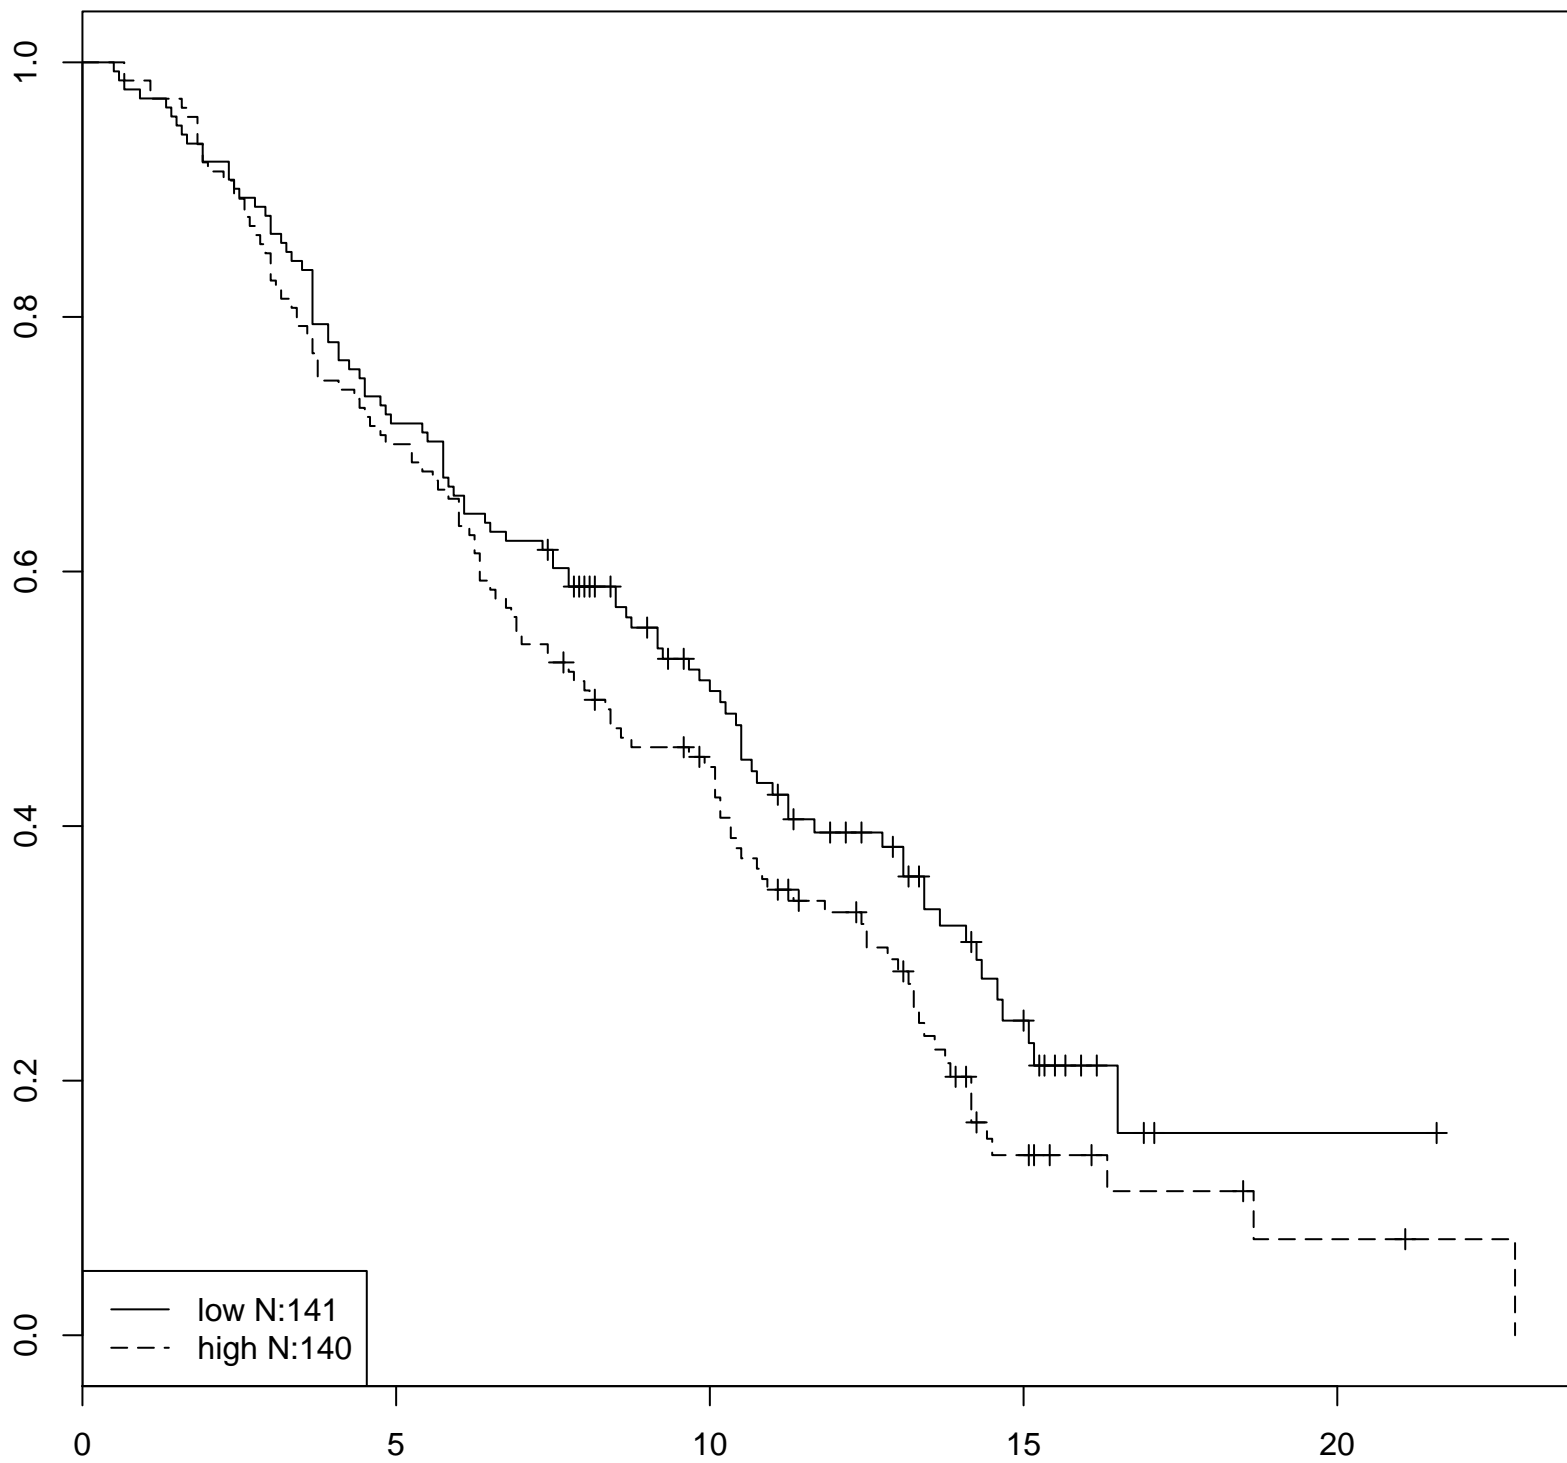

years  
log-rank test p-value = 0.09

# Survival by MUC1 expression

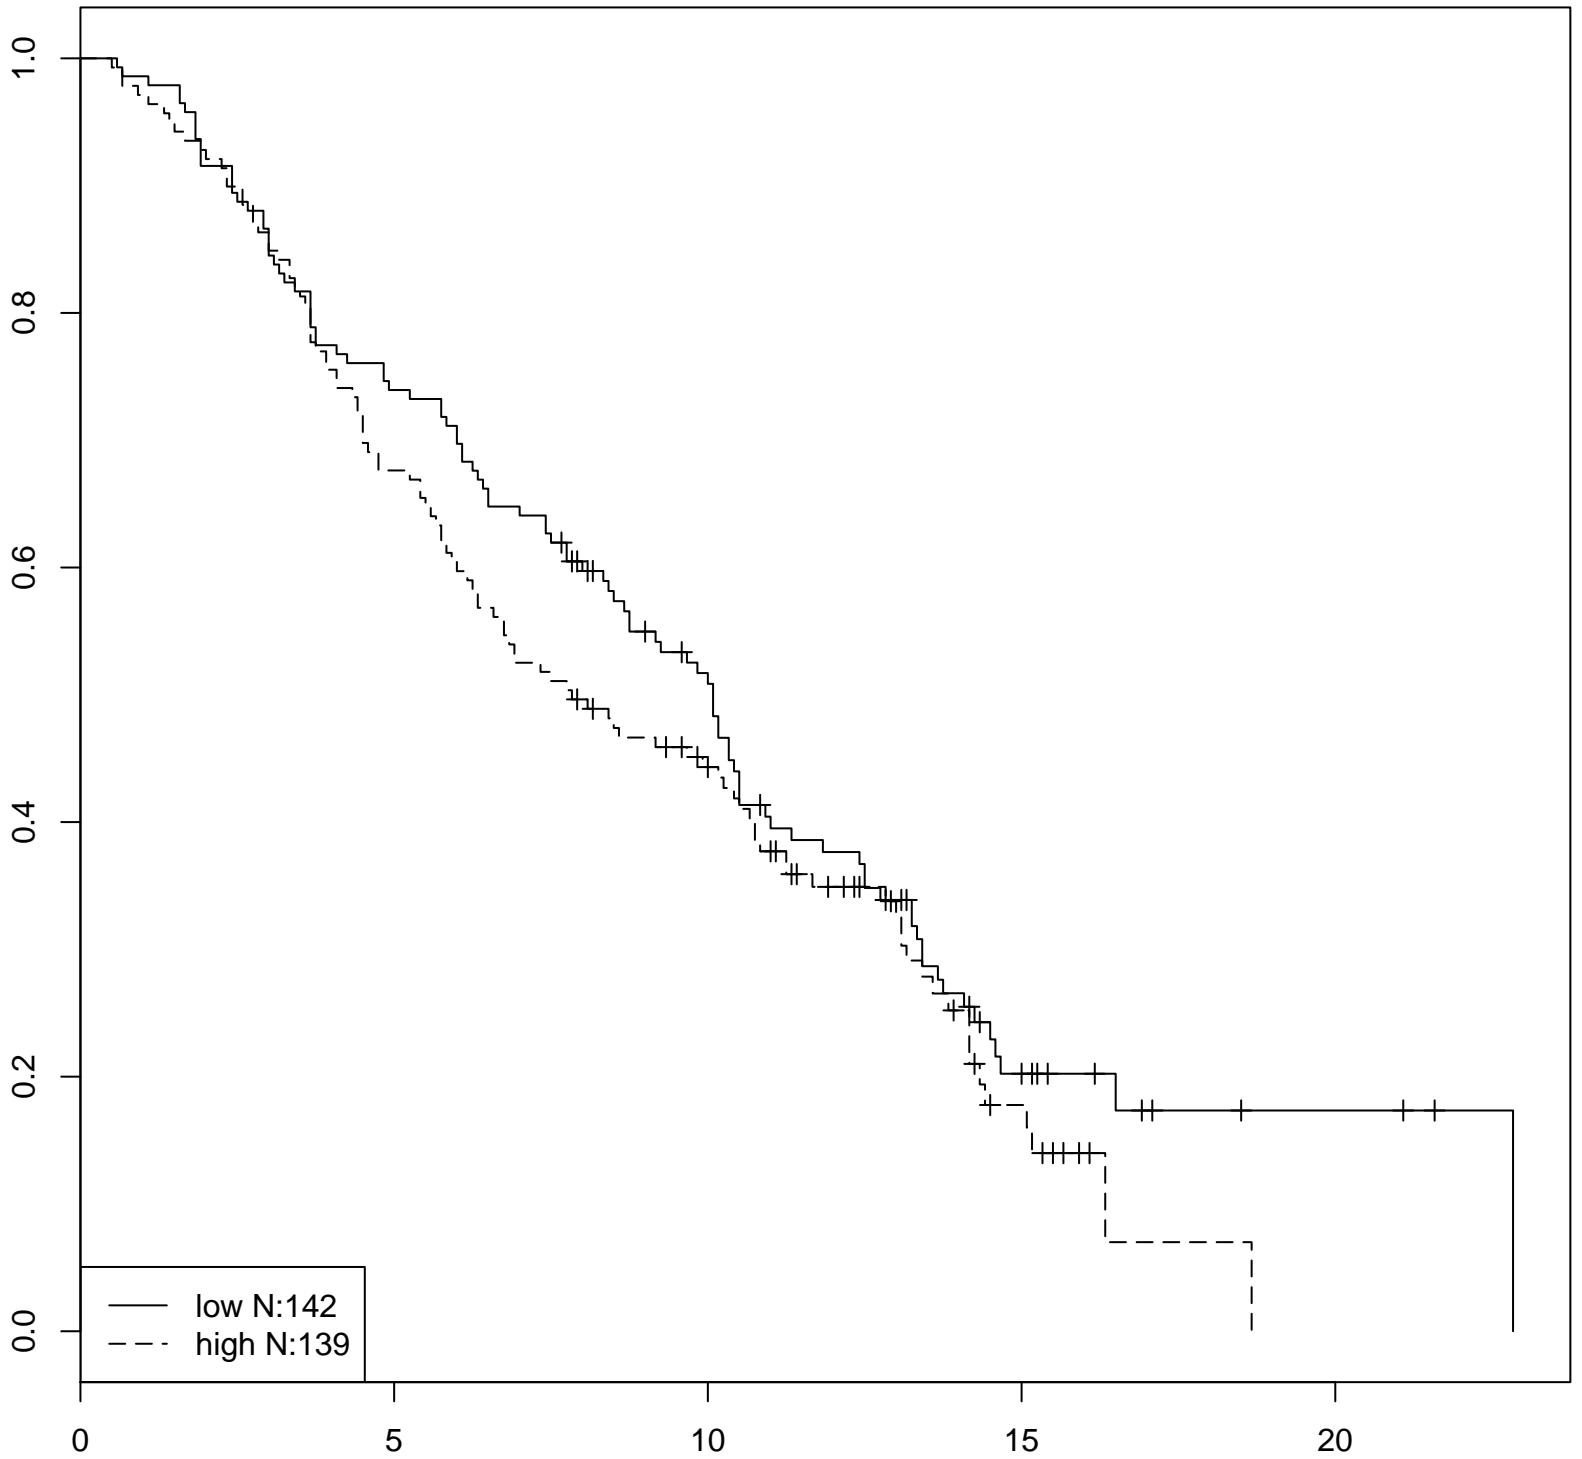

years  
log-rank test p-value = 0.2



# Survival by MVD expression

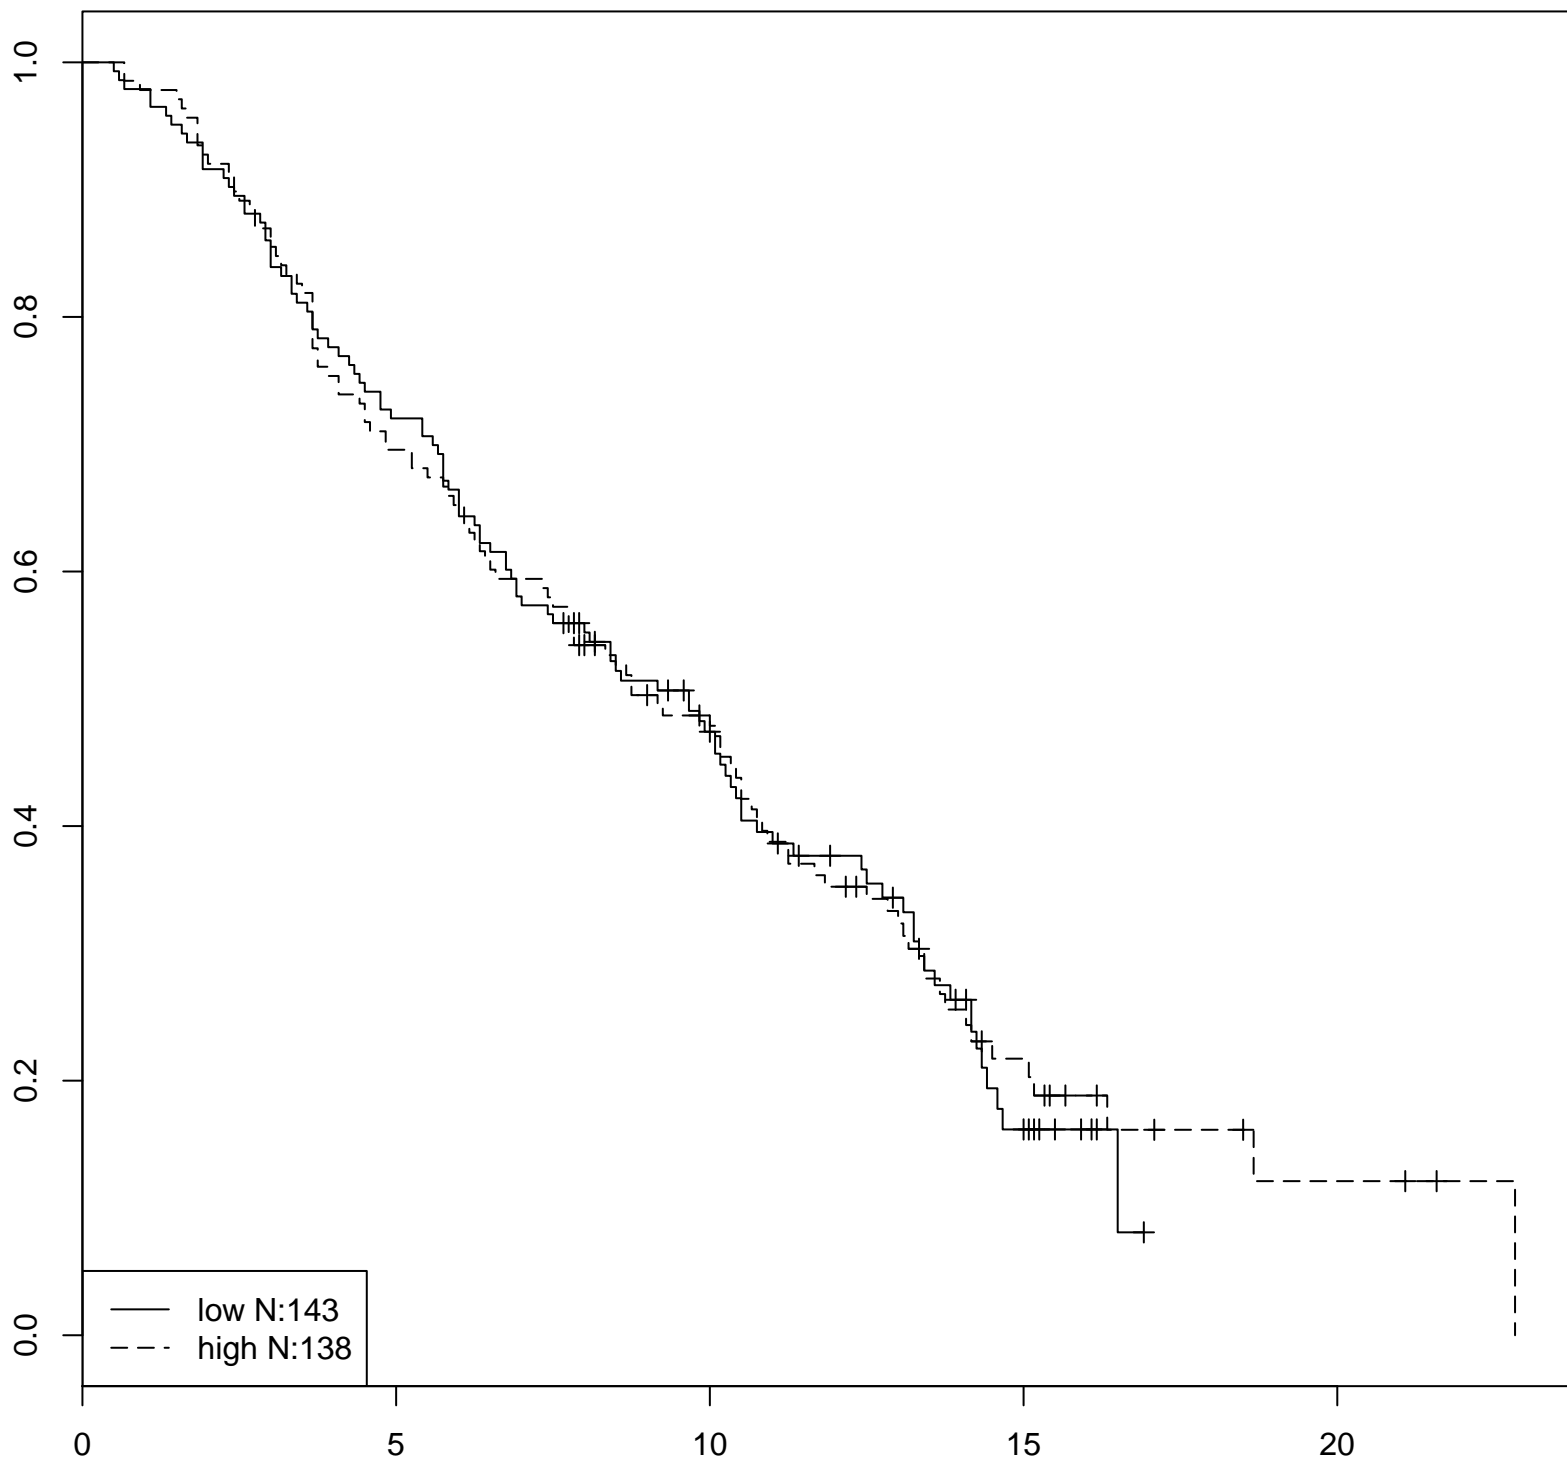

years

log-rank test p-value = 0.855

# Survival by MYC expression

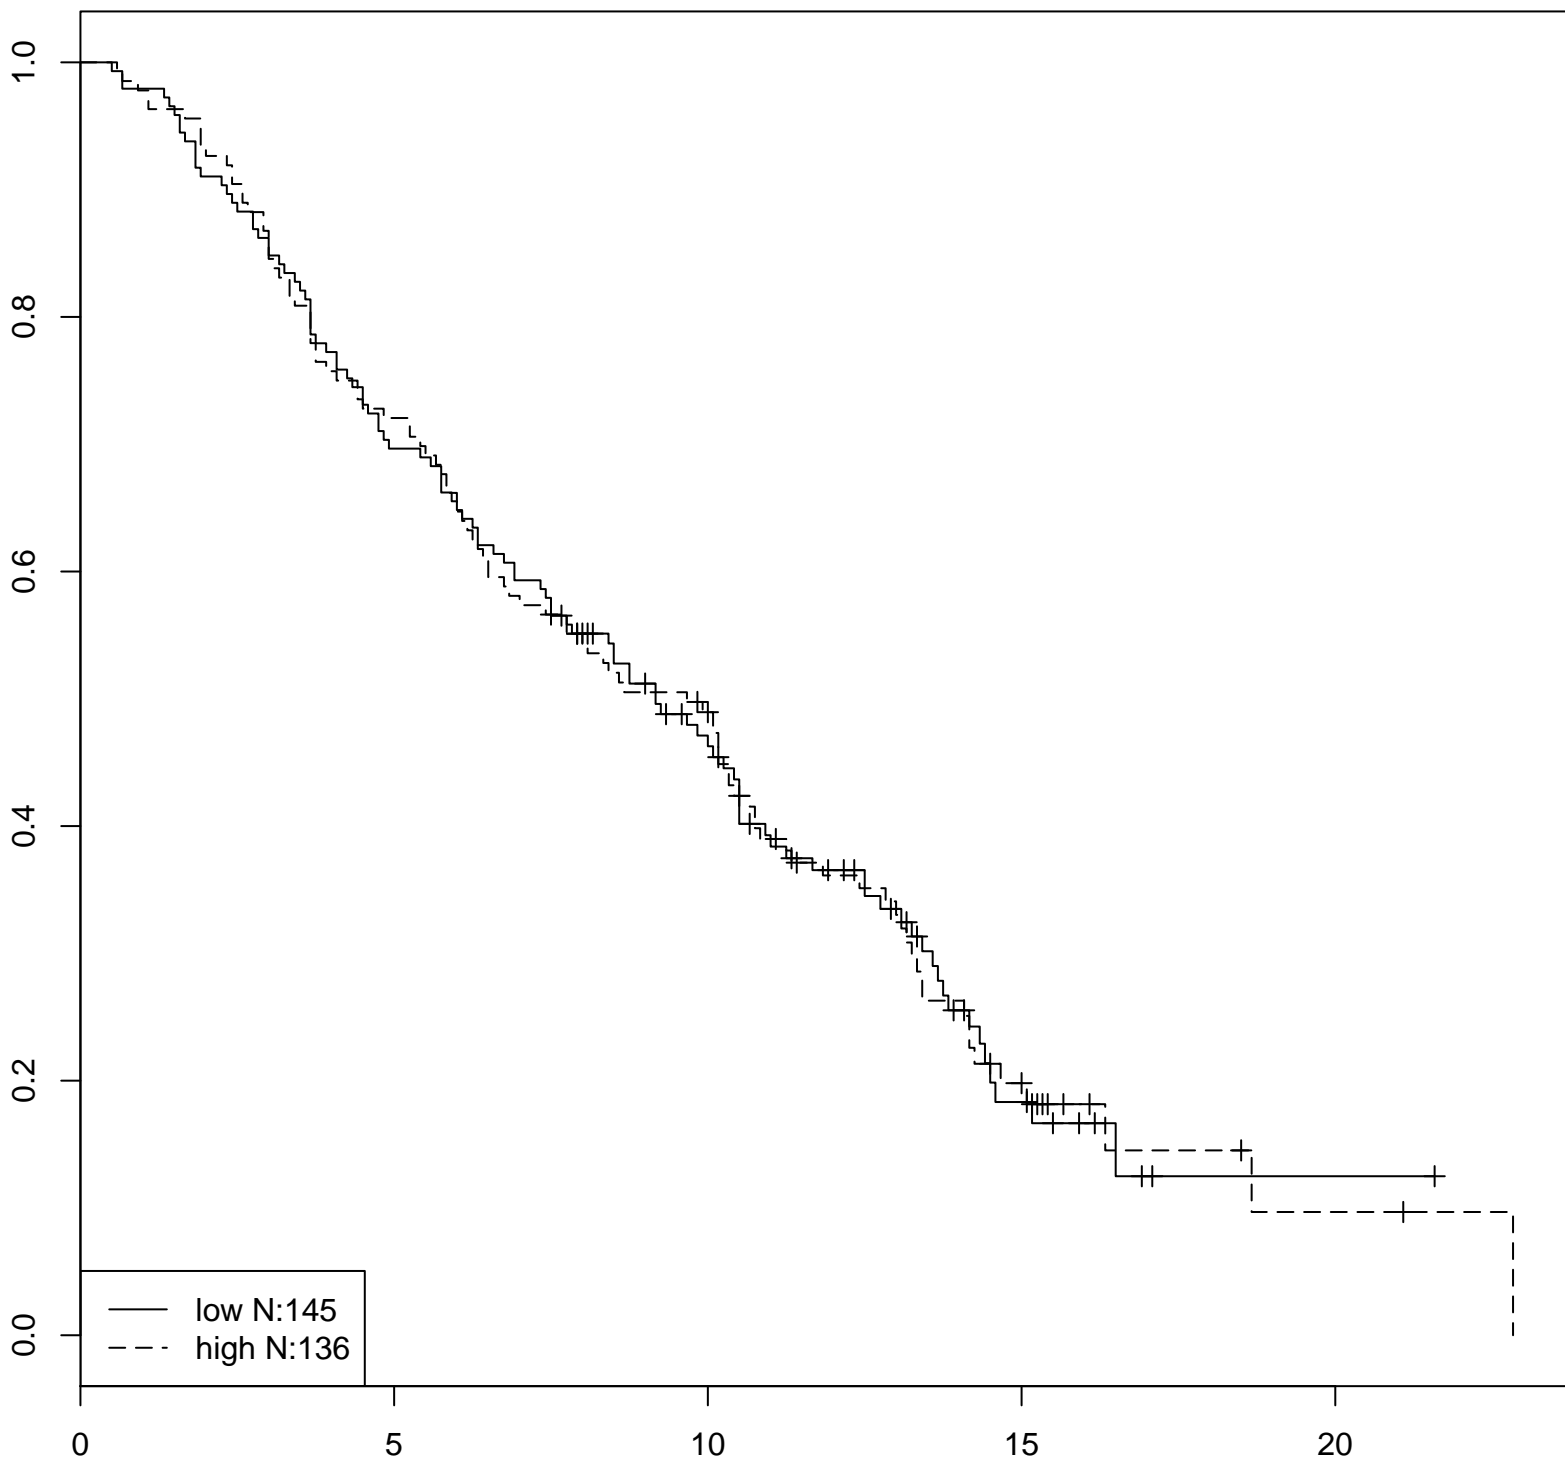

years

log-rank test p-value = 0.995

# Survival by MYH6 expression

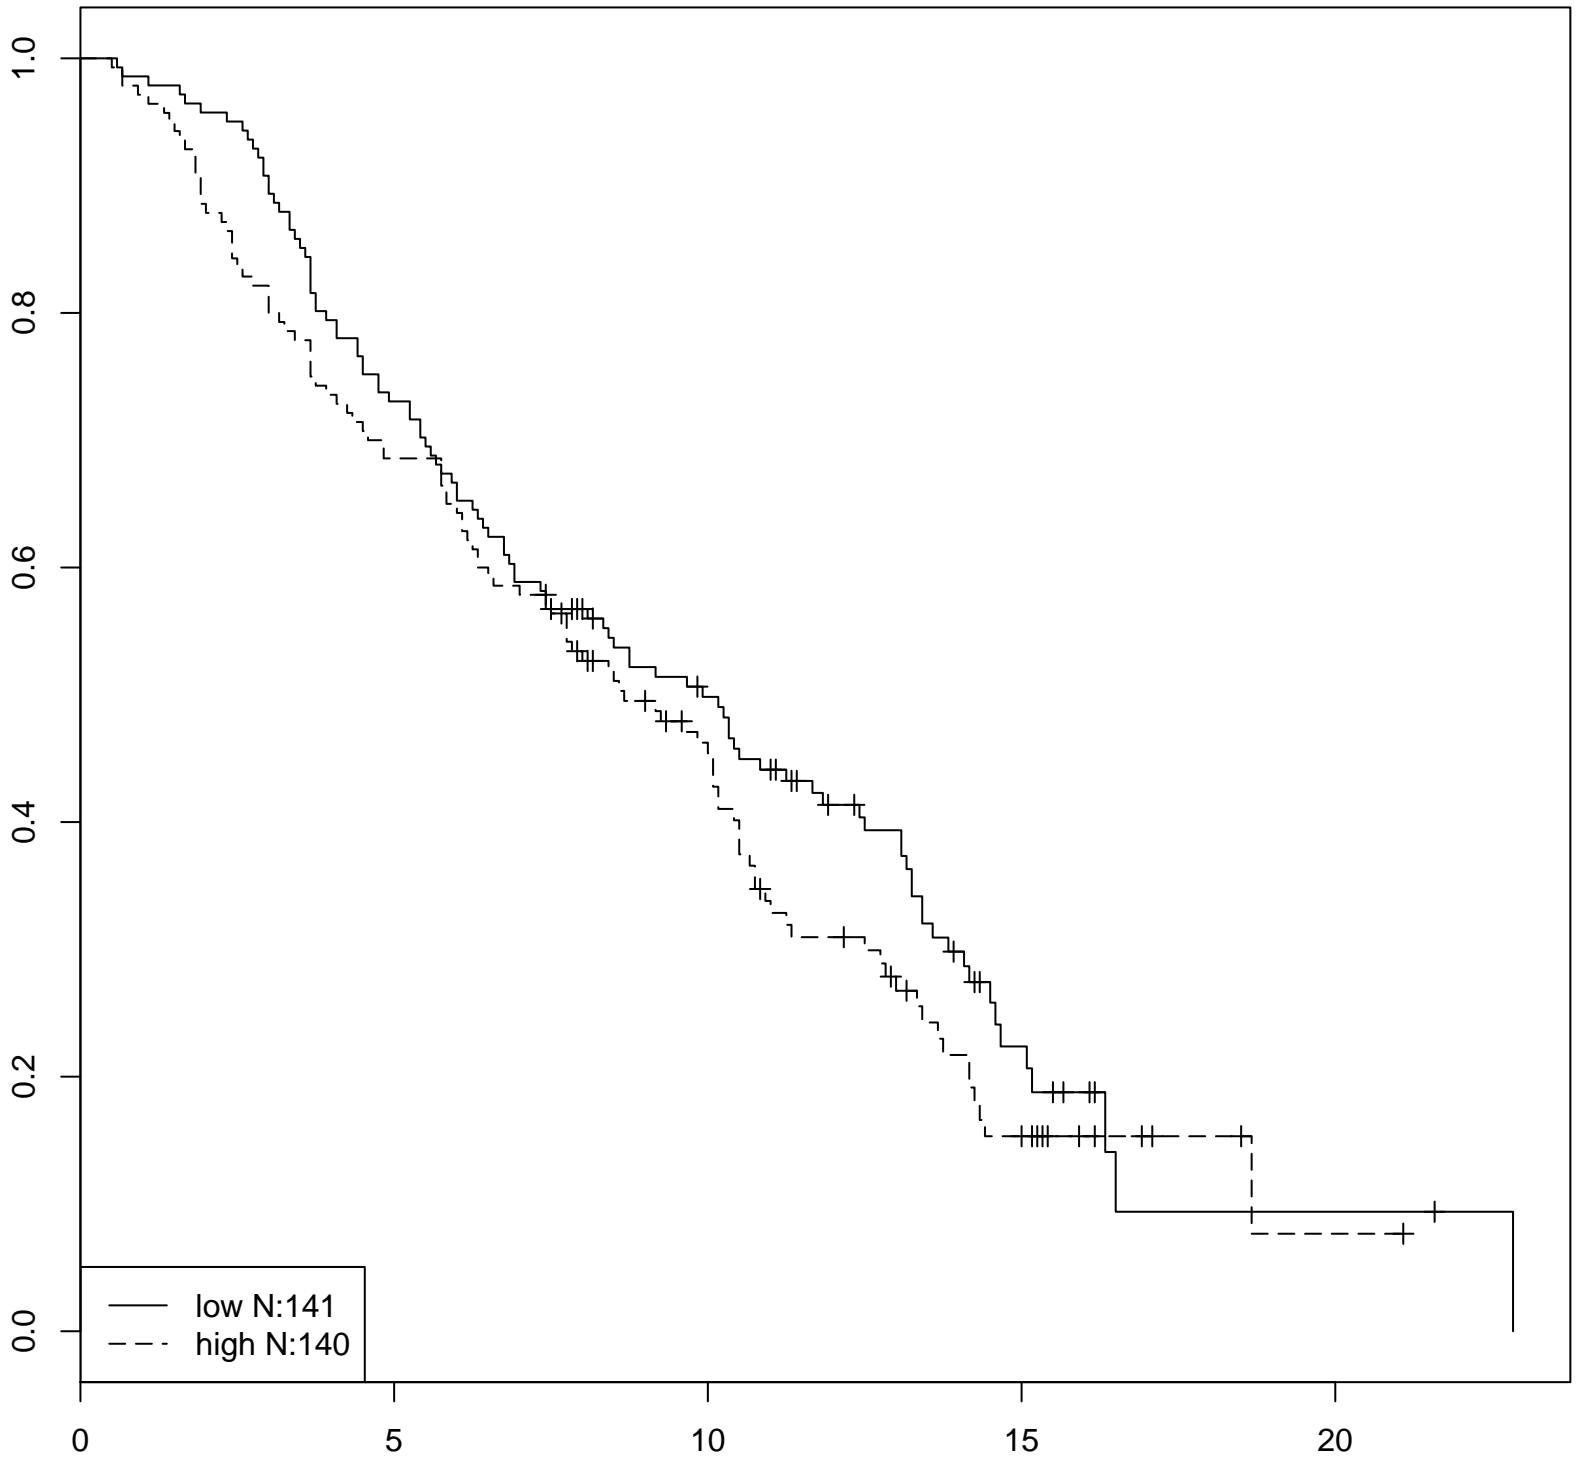

years

log-rank test p-value = 0.188

# Survival by NCOA3 expression

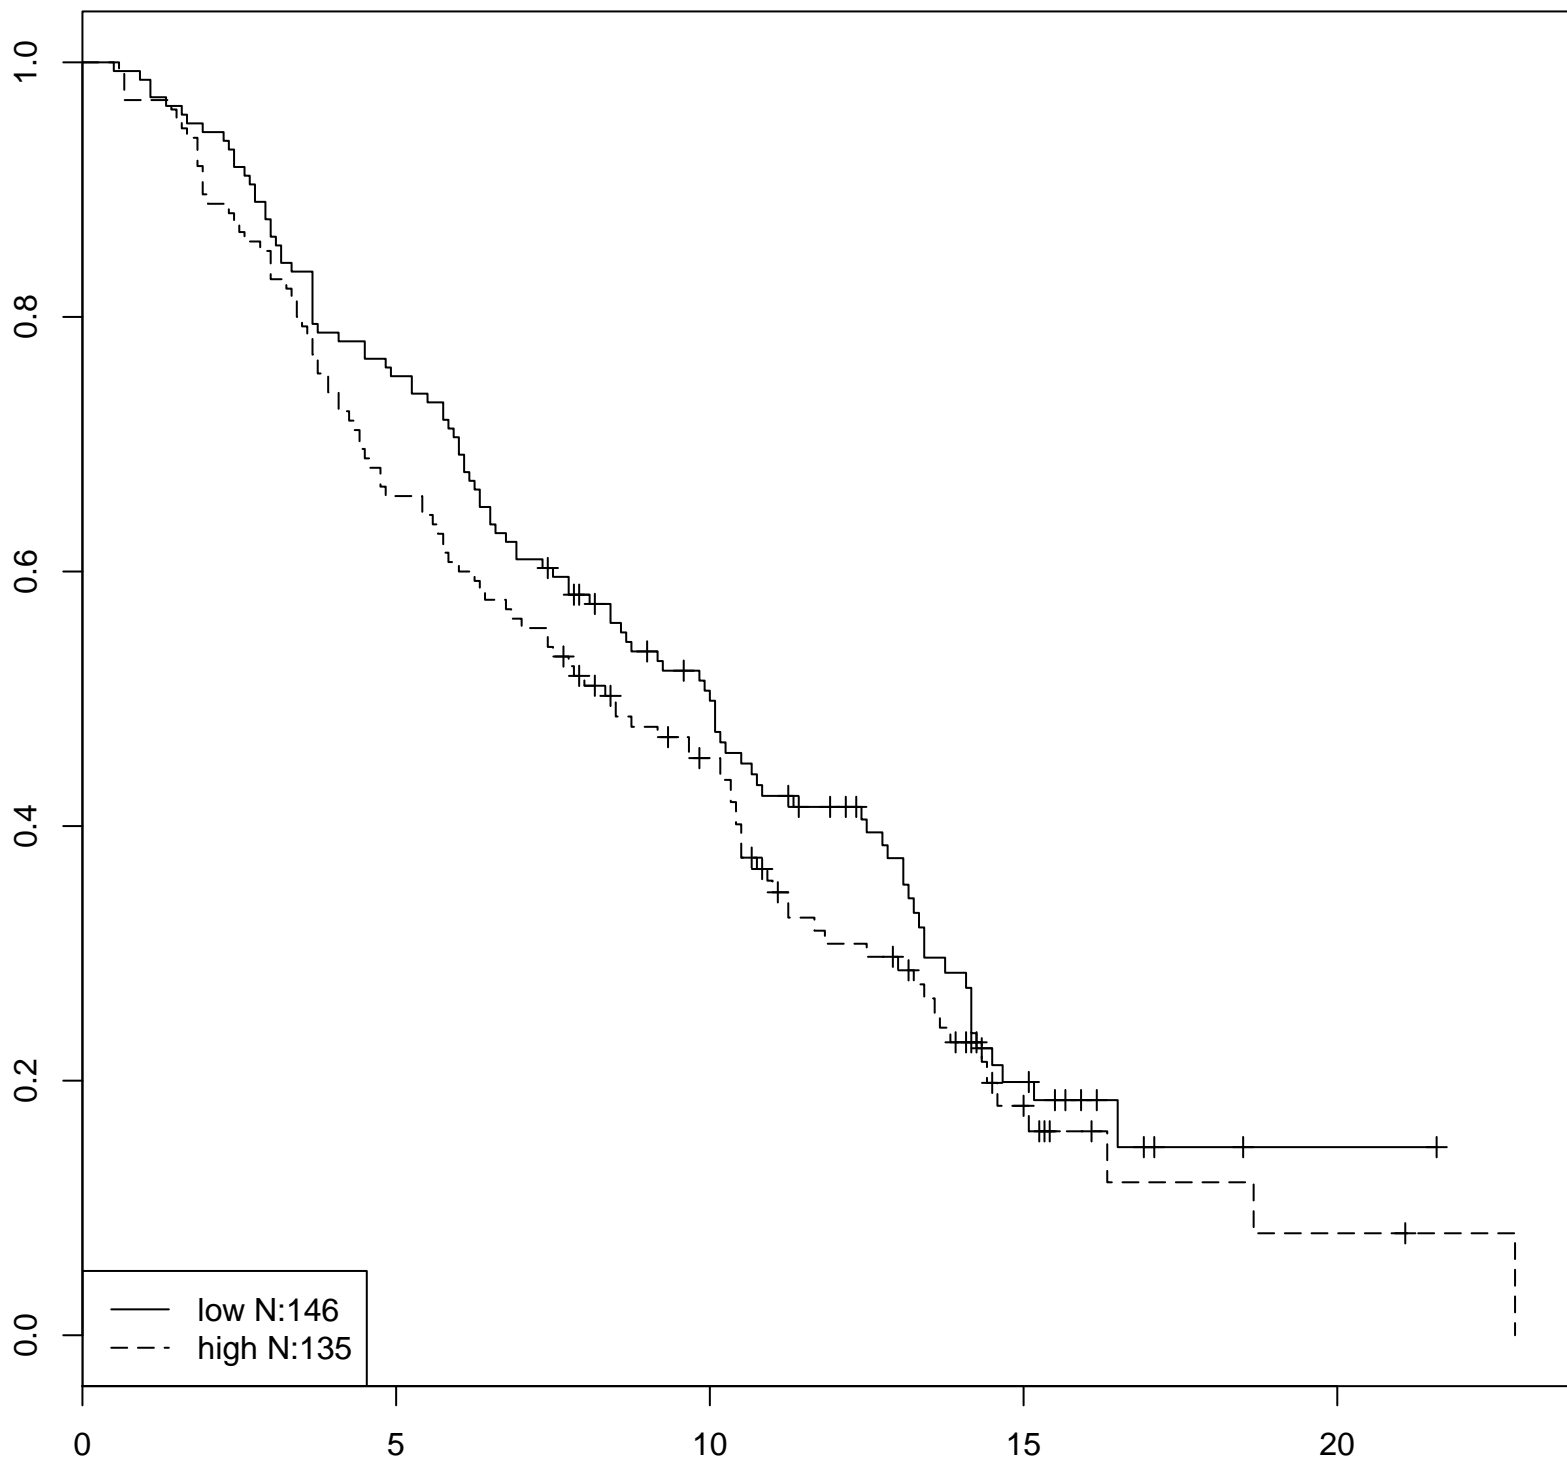

years

log-rank test p-value = 0.242

# Survival by NDRG1 expression

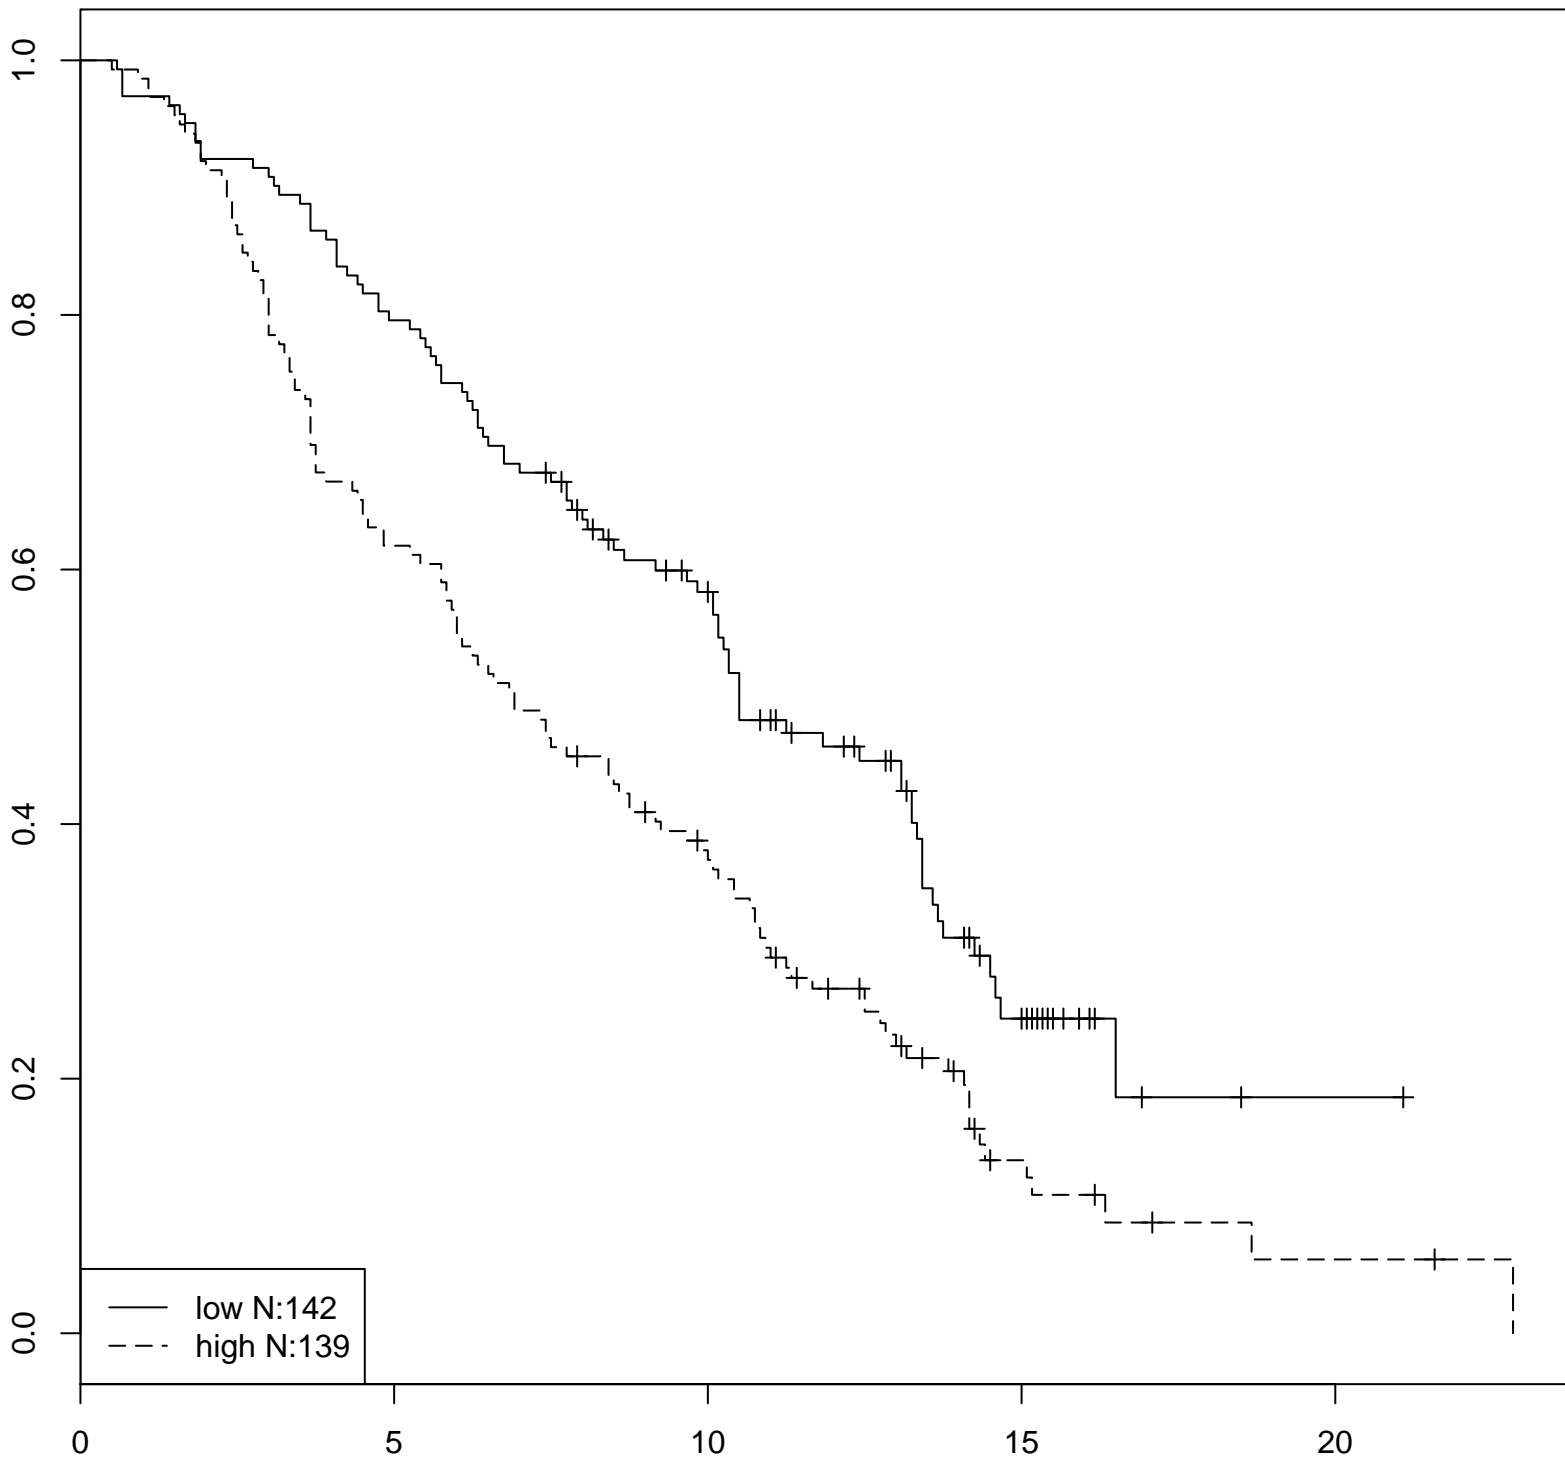

years  
log-rank test p-value = 0

# Survival by NFKB1 expression

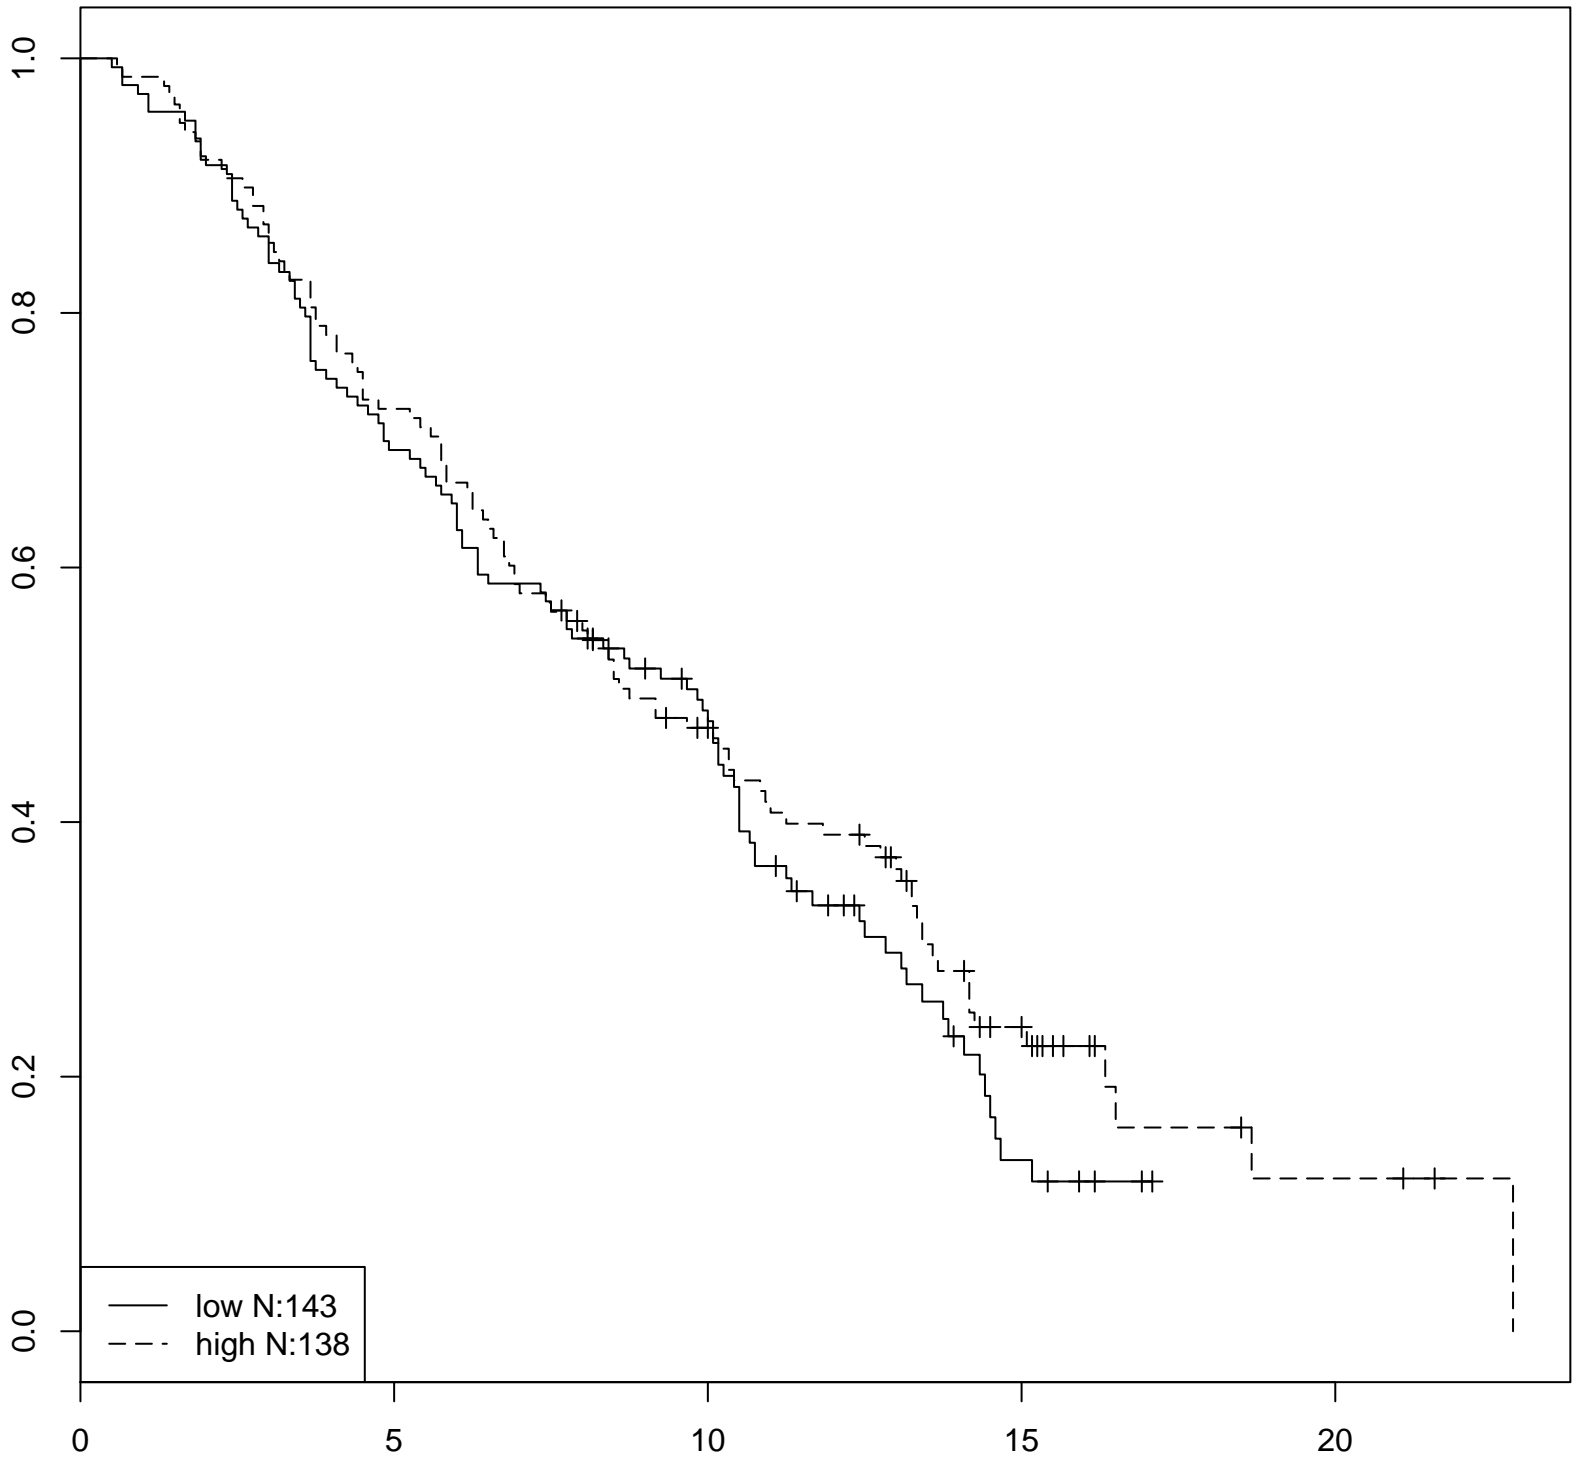

# Survival by NGFRAP1 expression

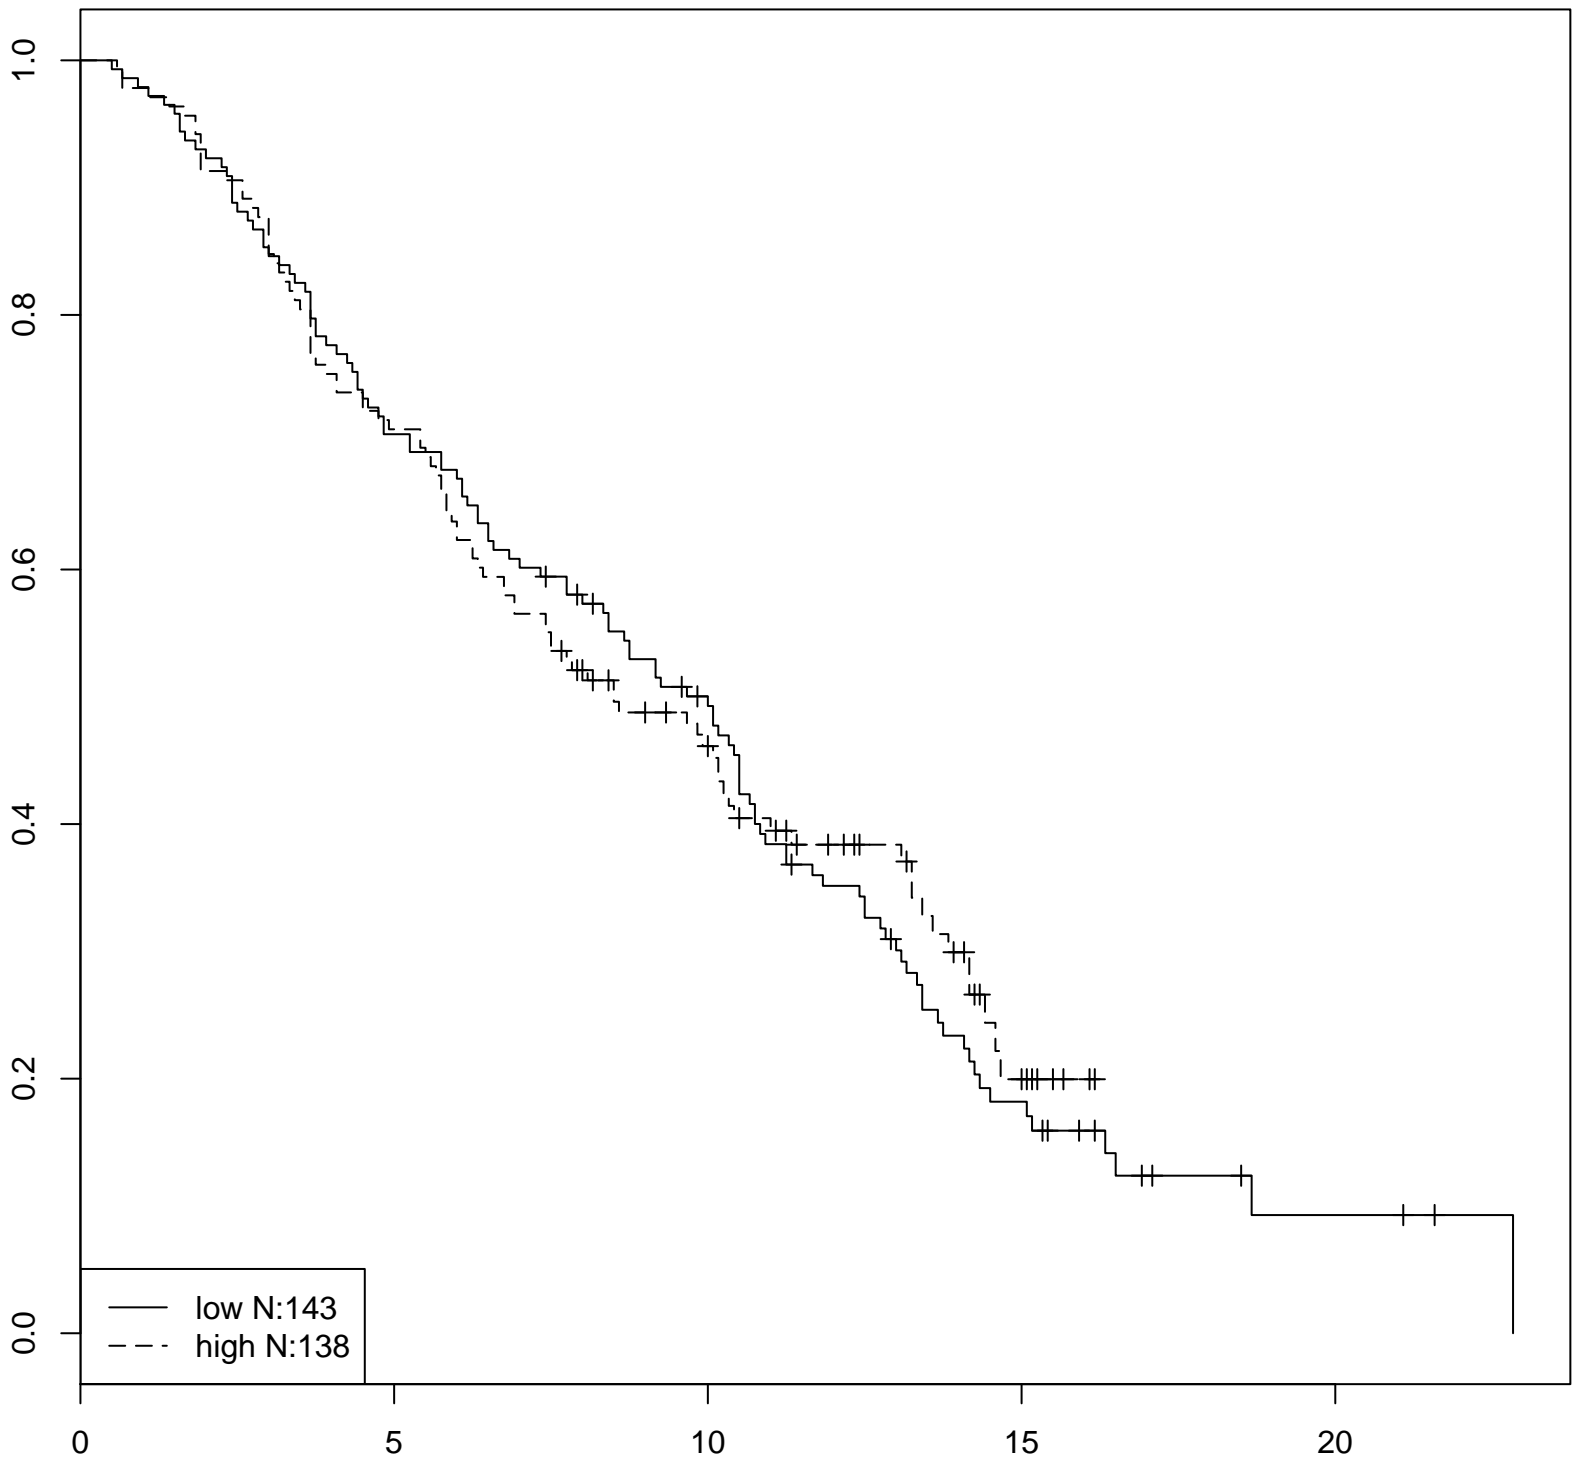

years  
log-rank test p-value = 0.734

# Survival by NKX2-5 expression

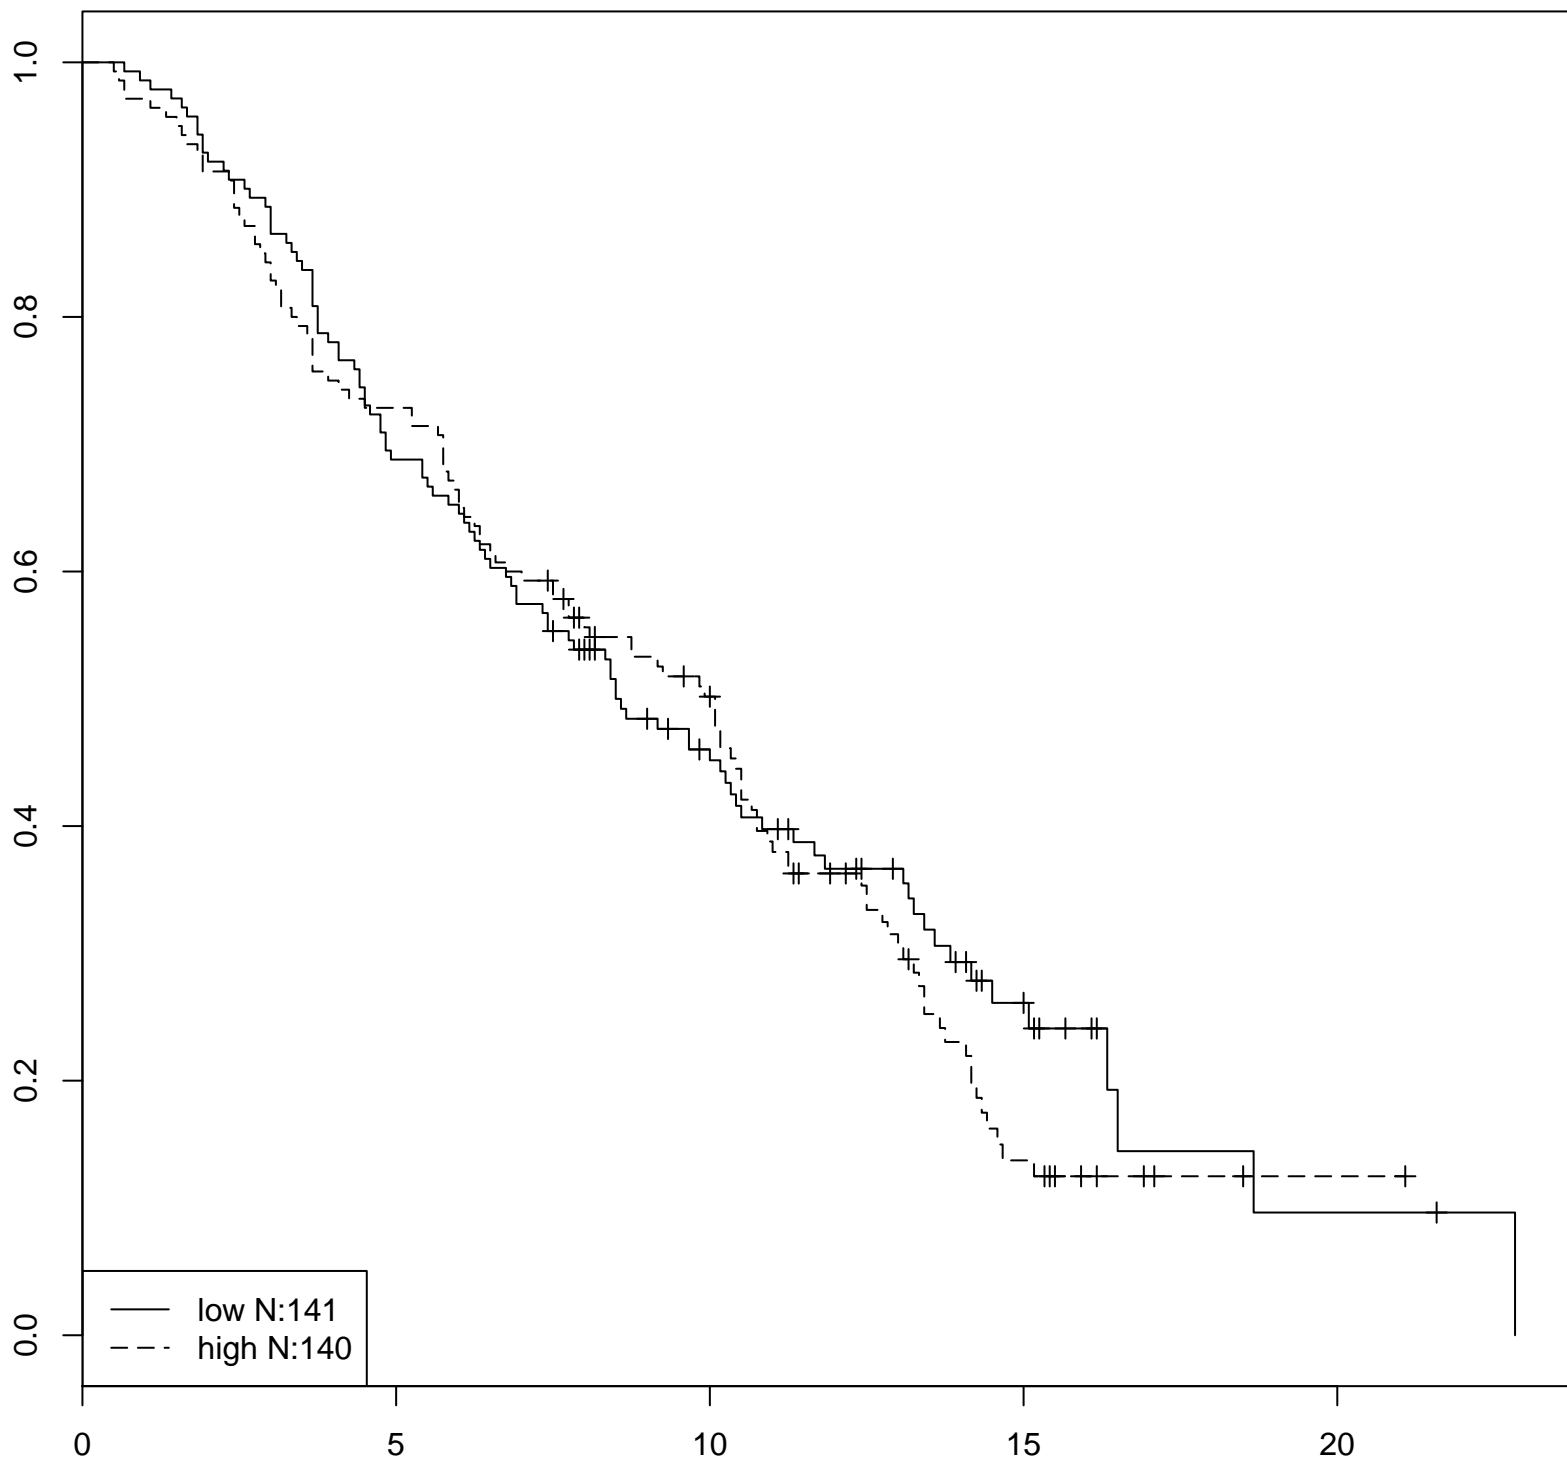



# Survival by NKX3-1 expression

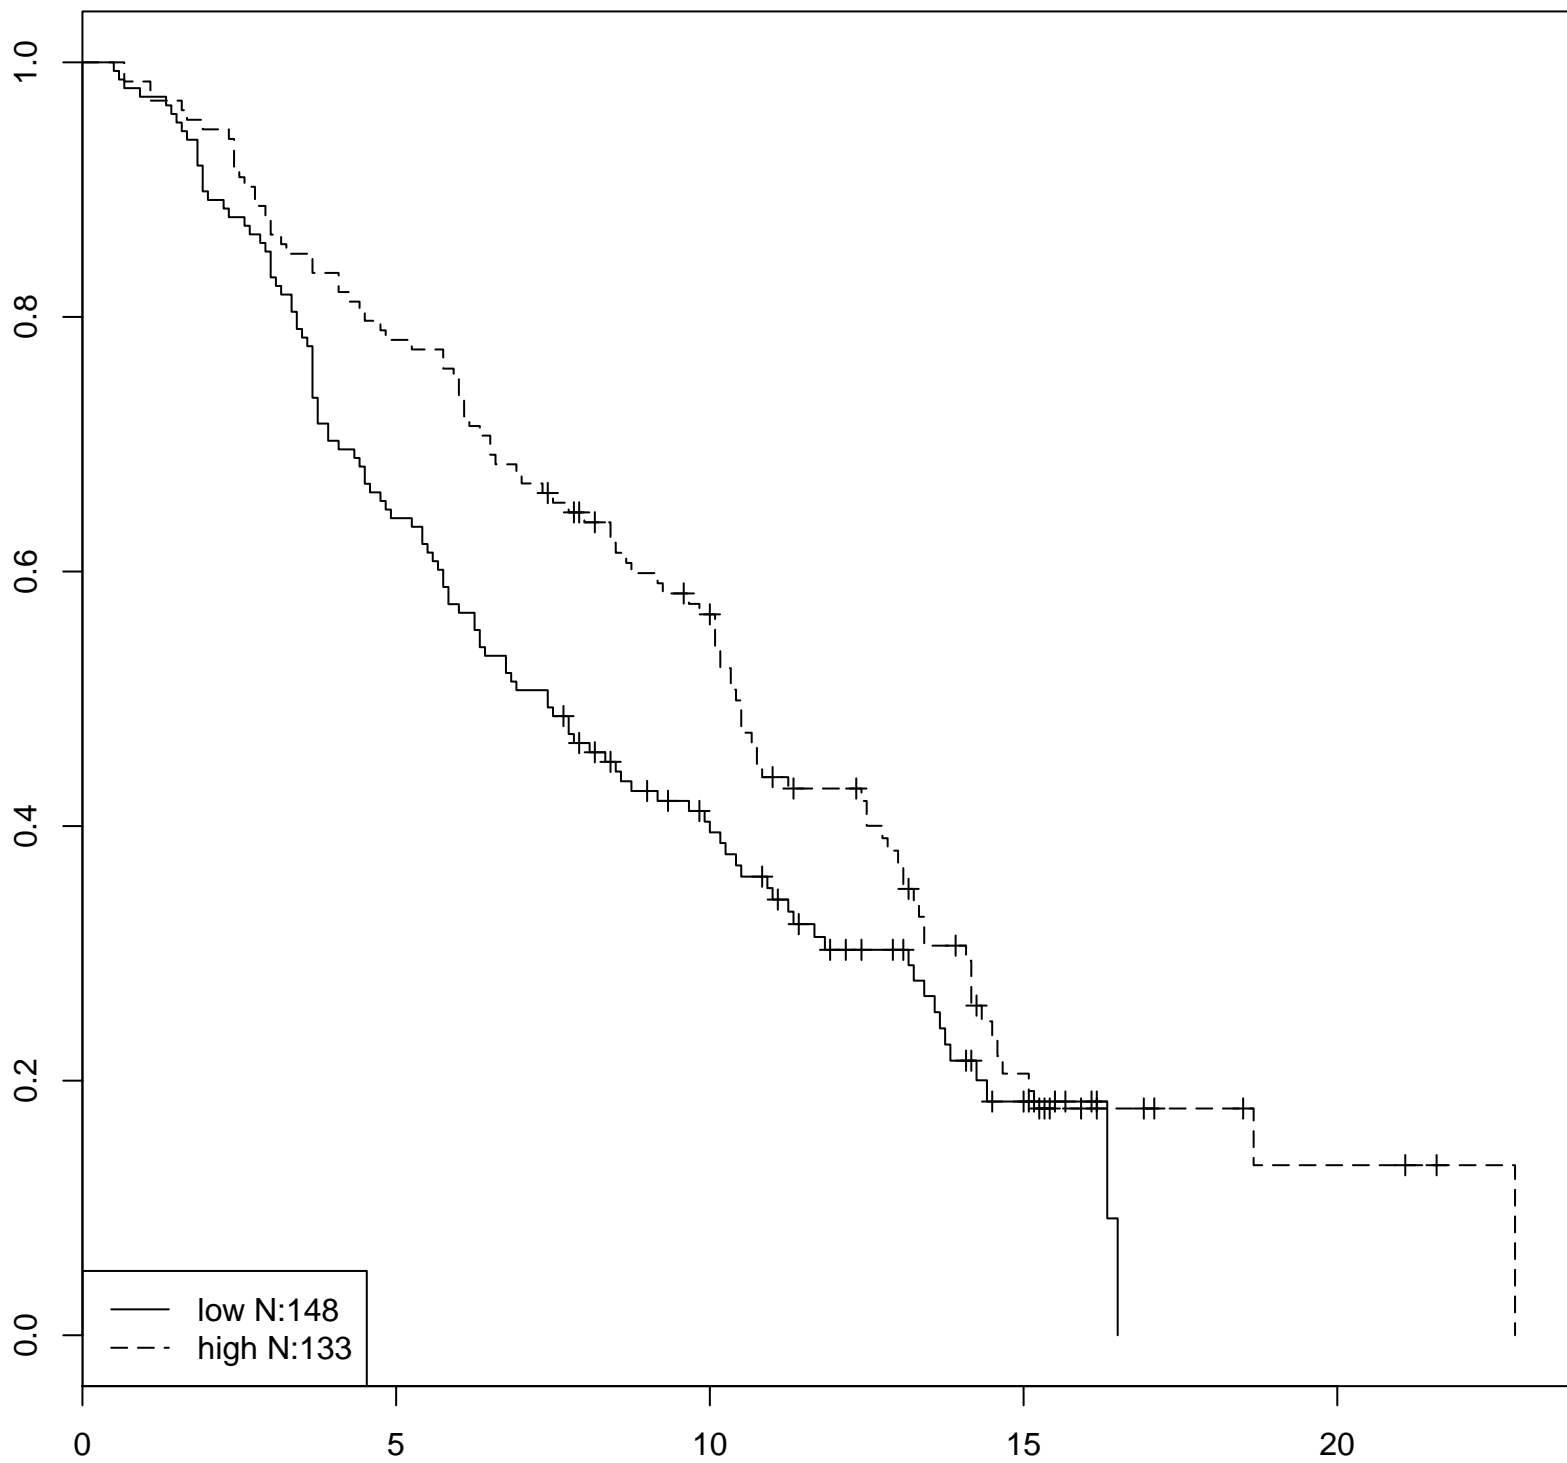

years

log-rank test p-value = 0.032

# Survival by NME1 expression

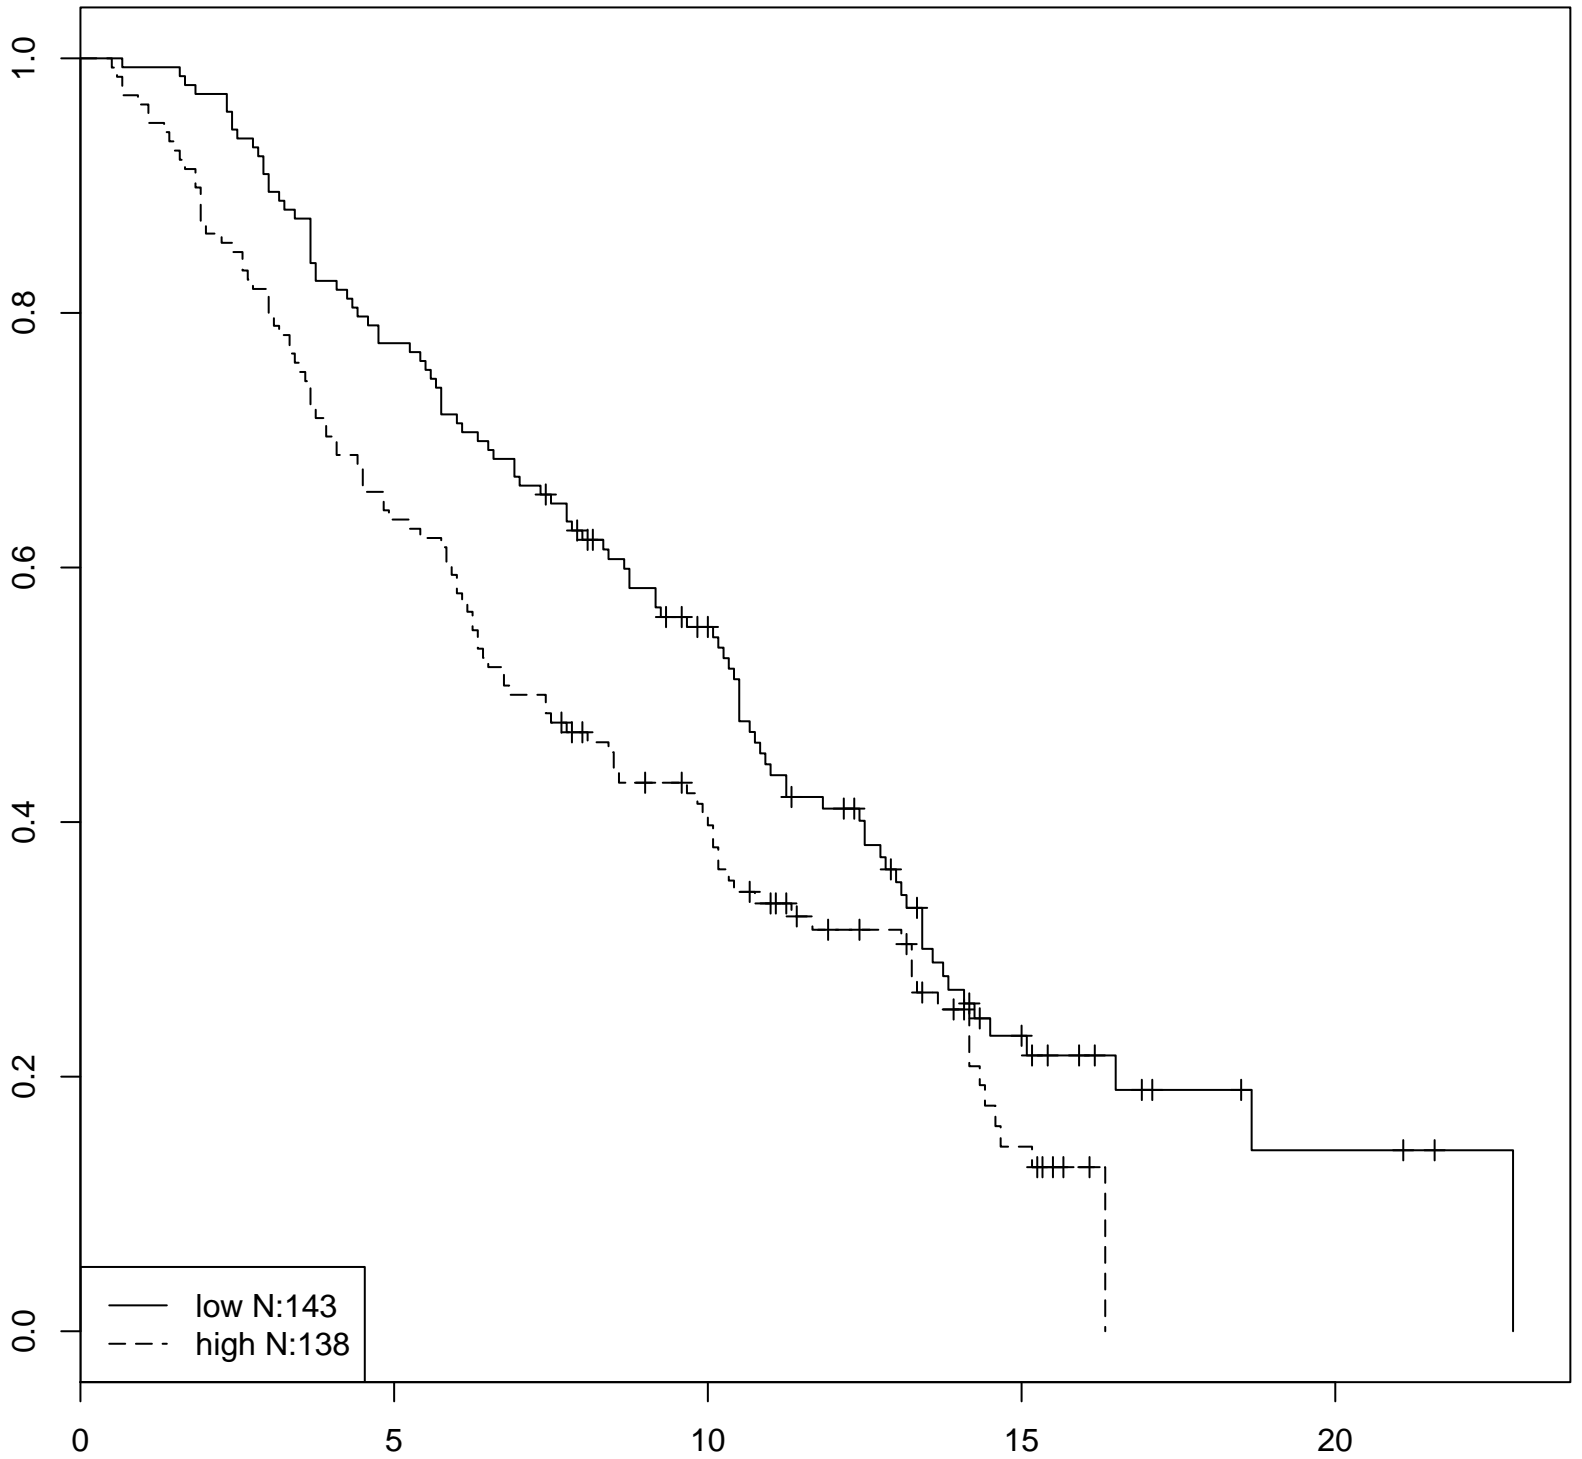

years

log-rank test p-value = 0.015

# Survival by NOTCH3 expression

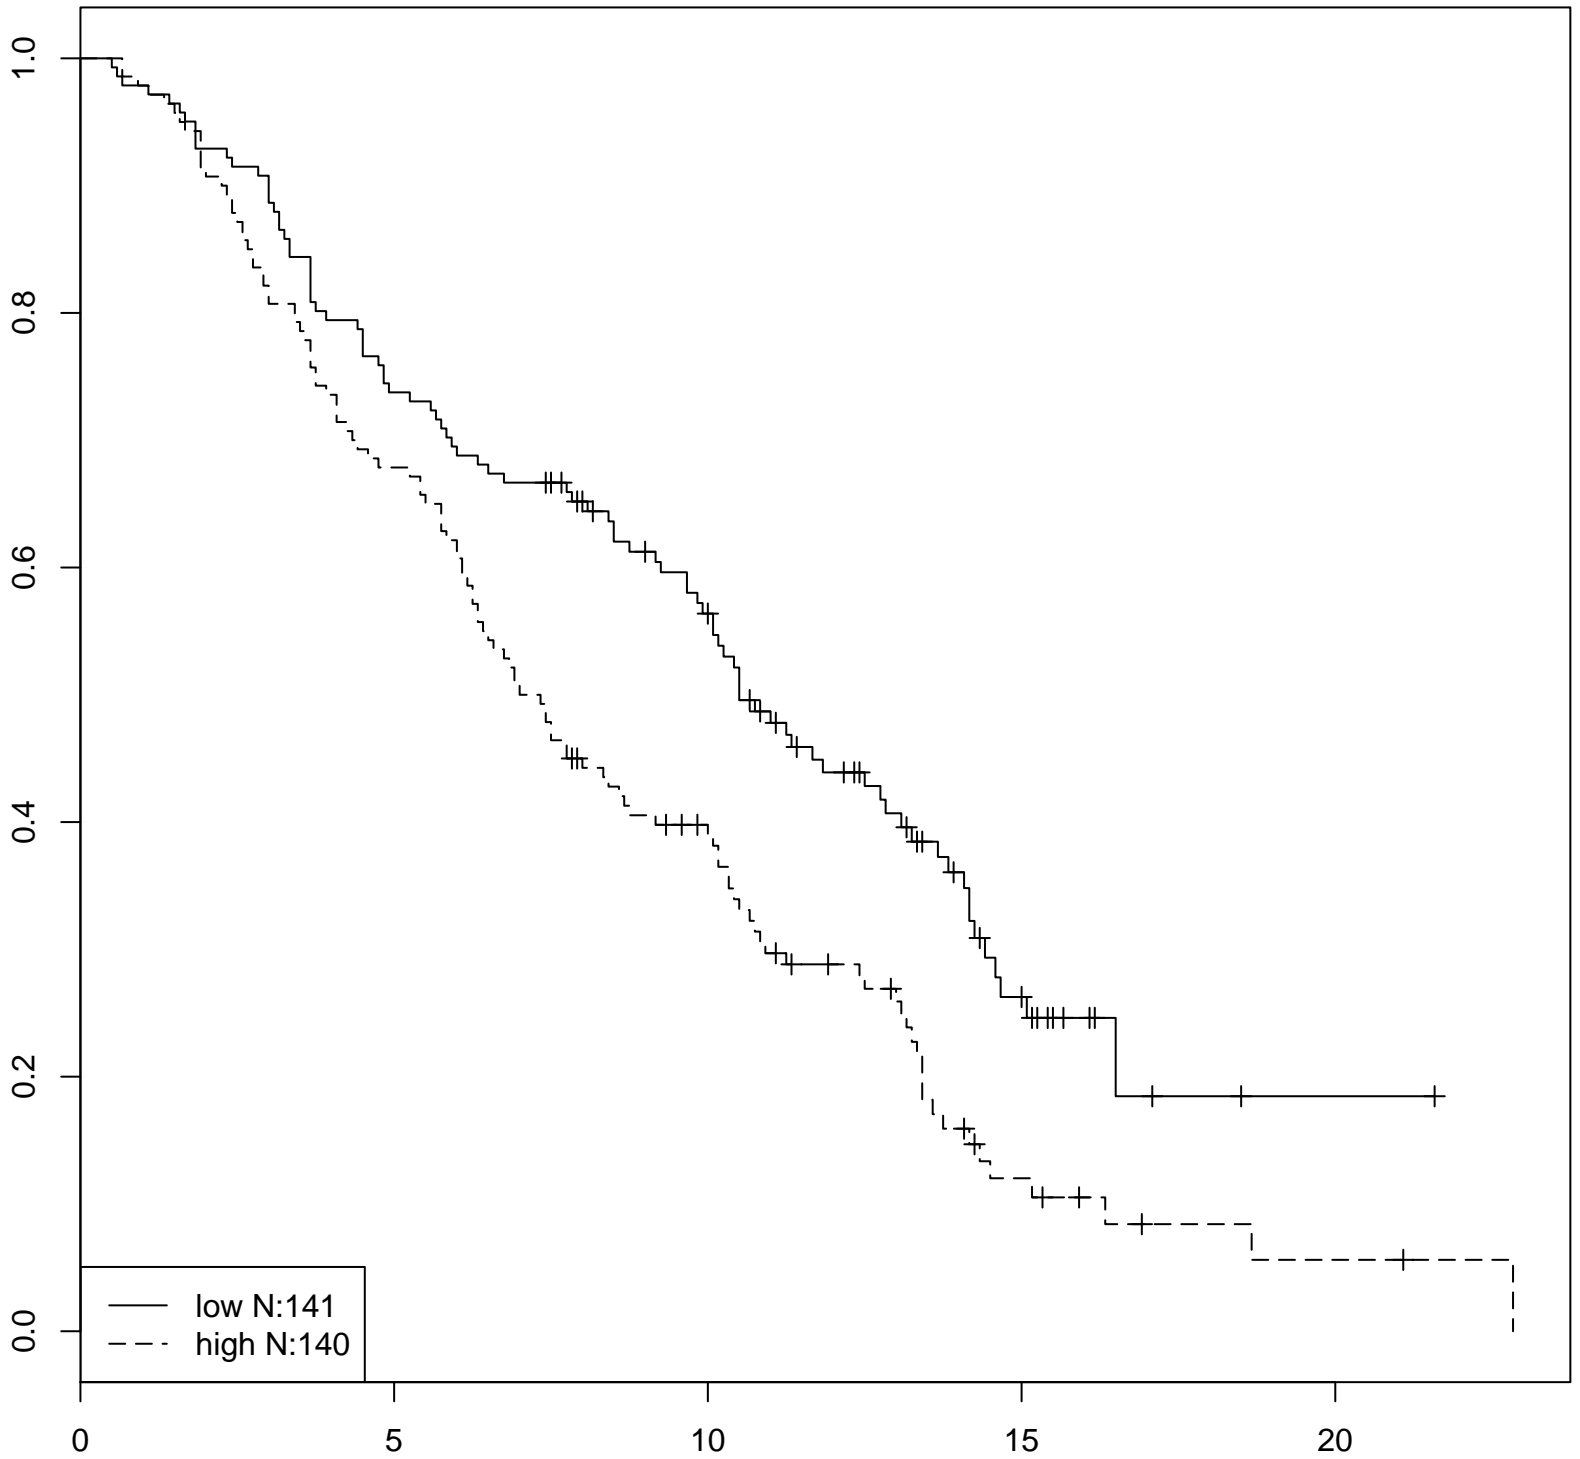

years

log-rank test p-value = 0.001

# Survival by NPR1 expression

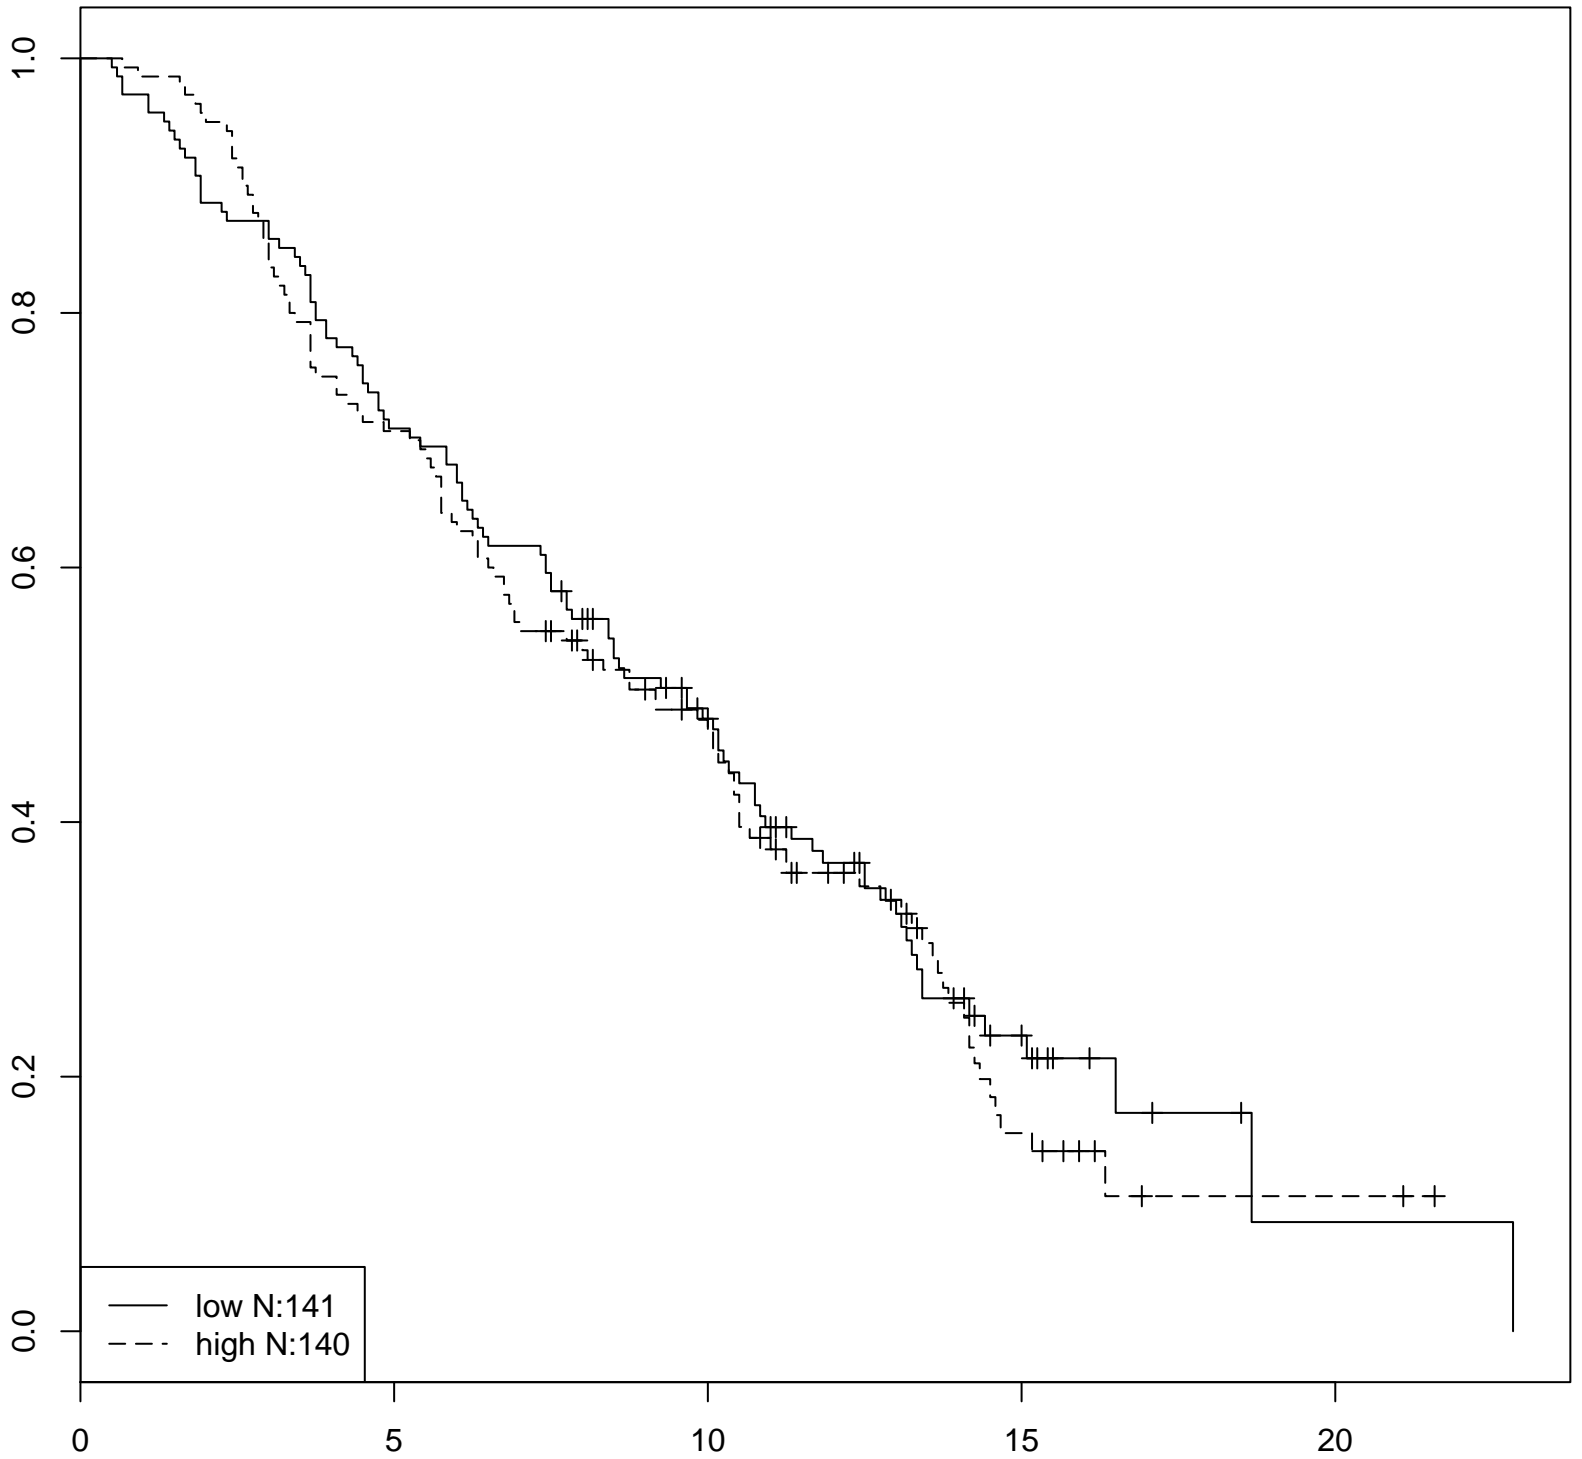

years

log-rank test p-value = 0.575

# Survival by PDGFRB expression

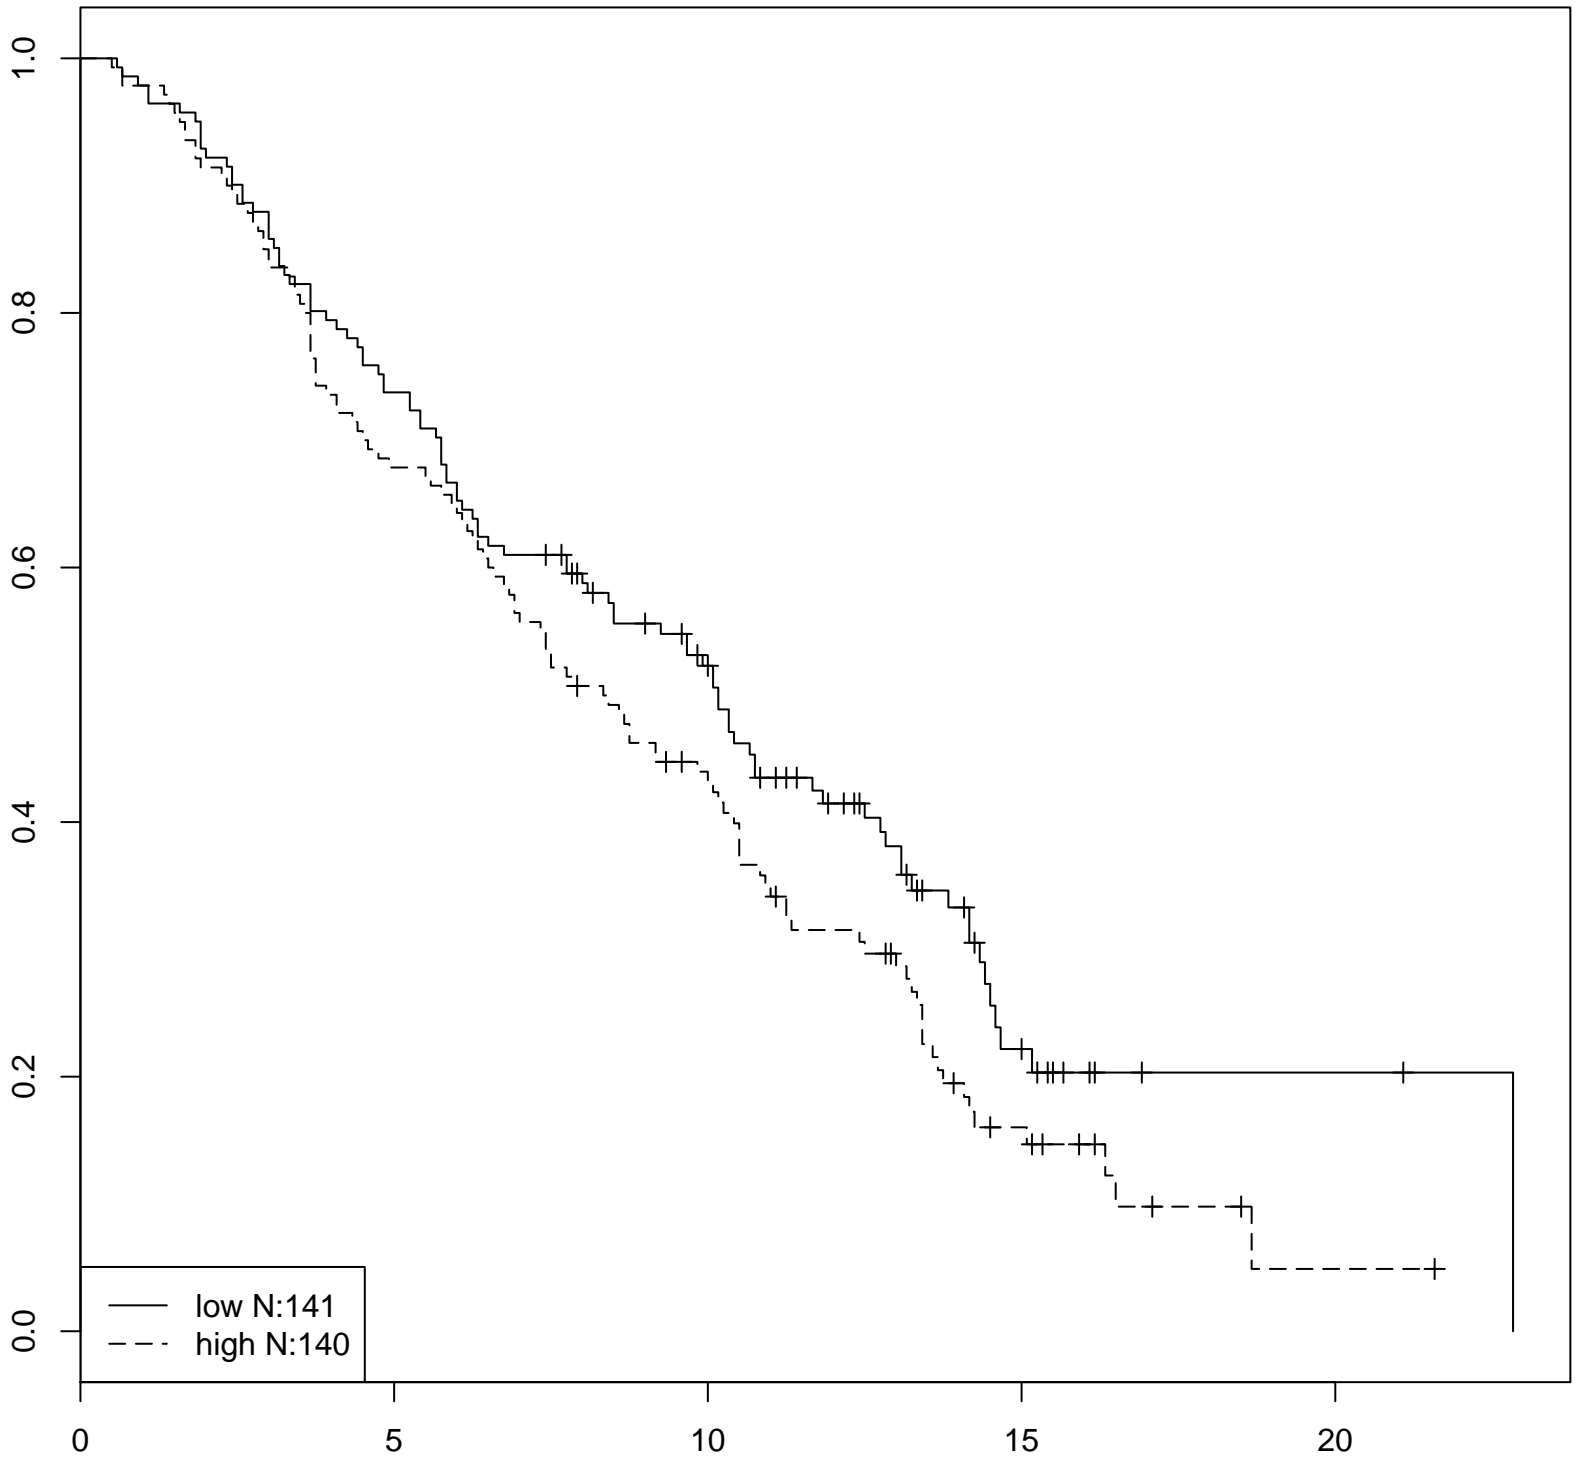

years

log-rank test p-value = 0.06

# Survival by PDIA3 expression

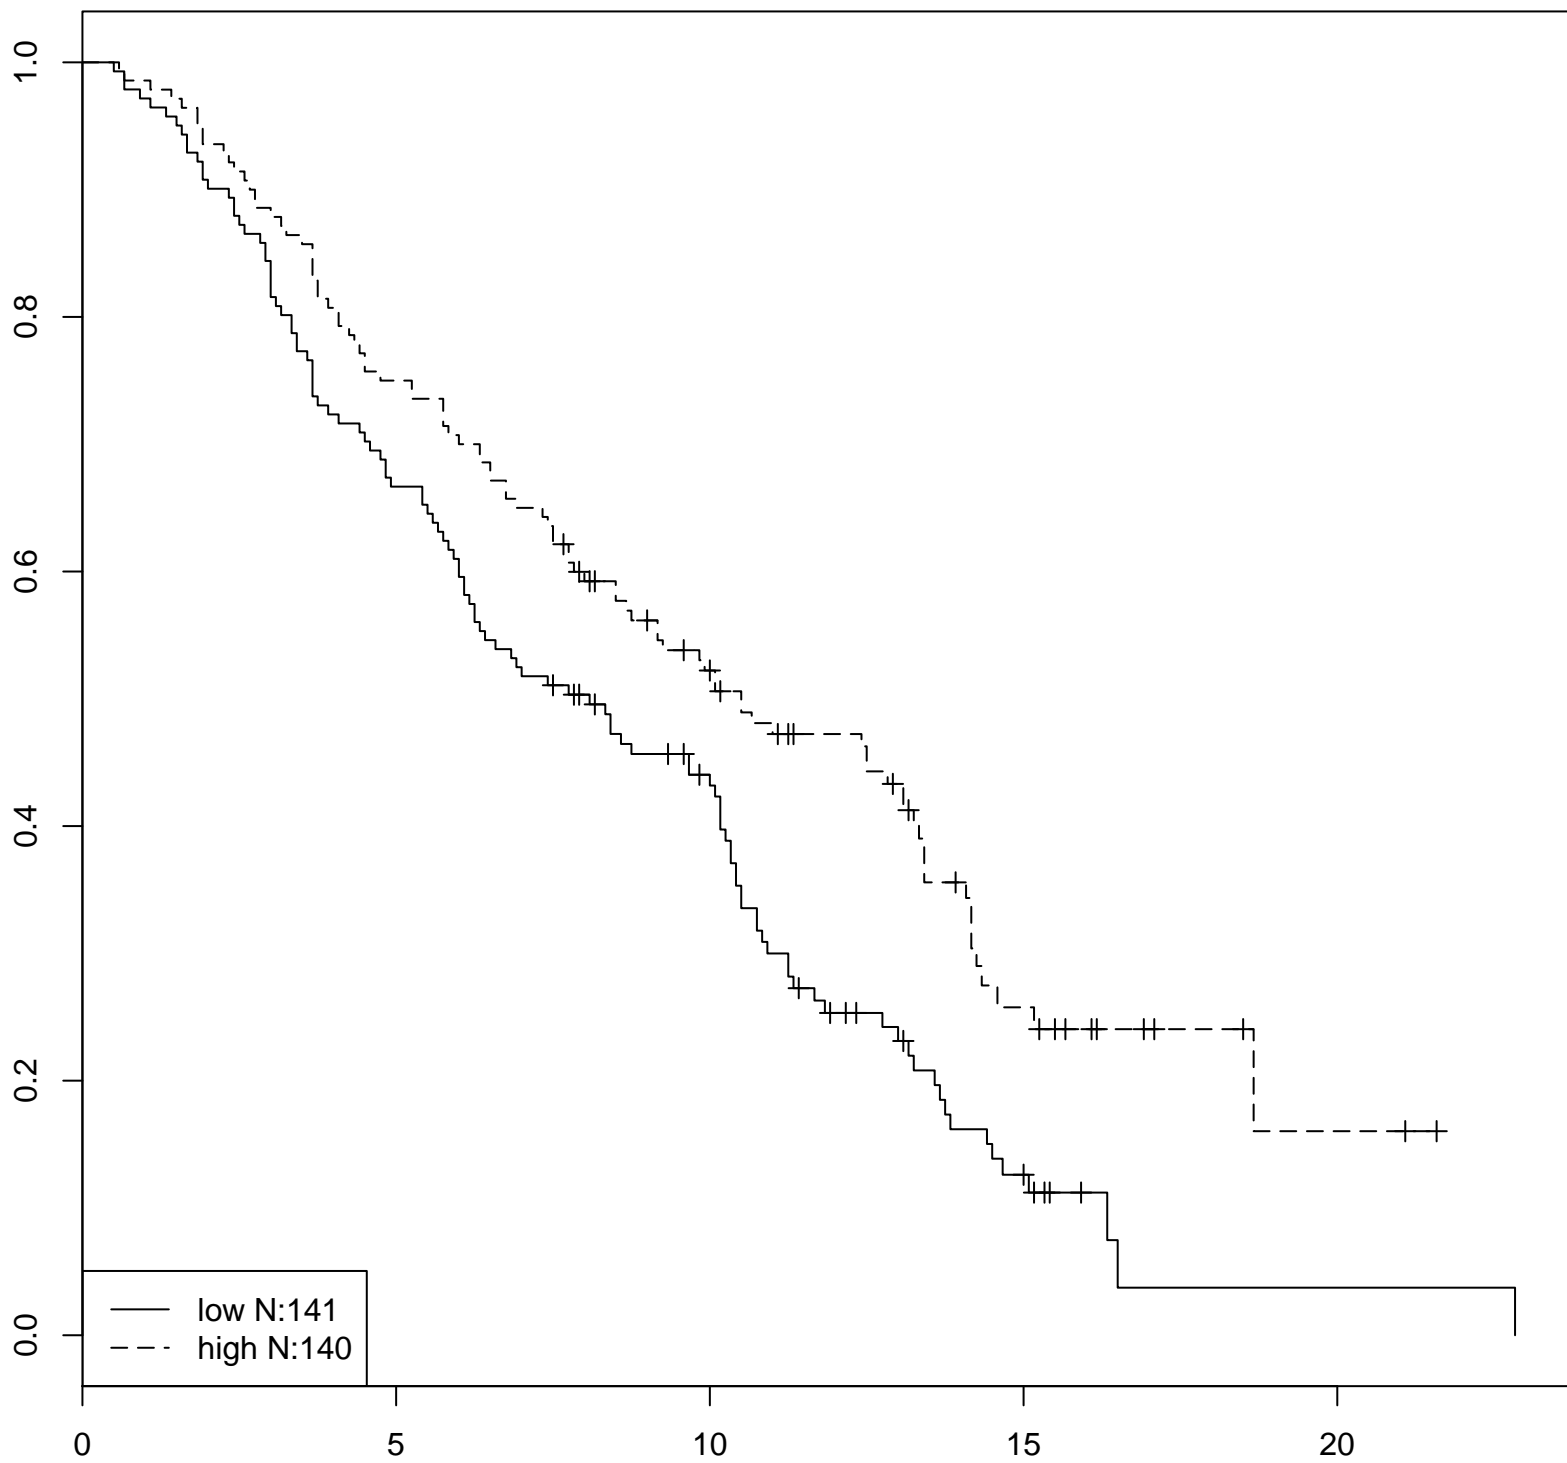

years

log-rank test p-value = 0.002

# Survival by PDLIM4 expression

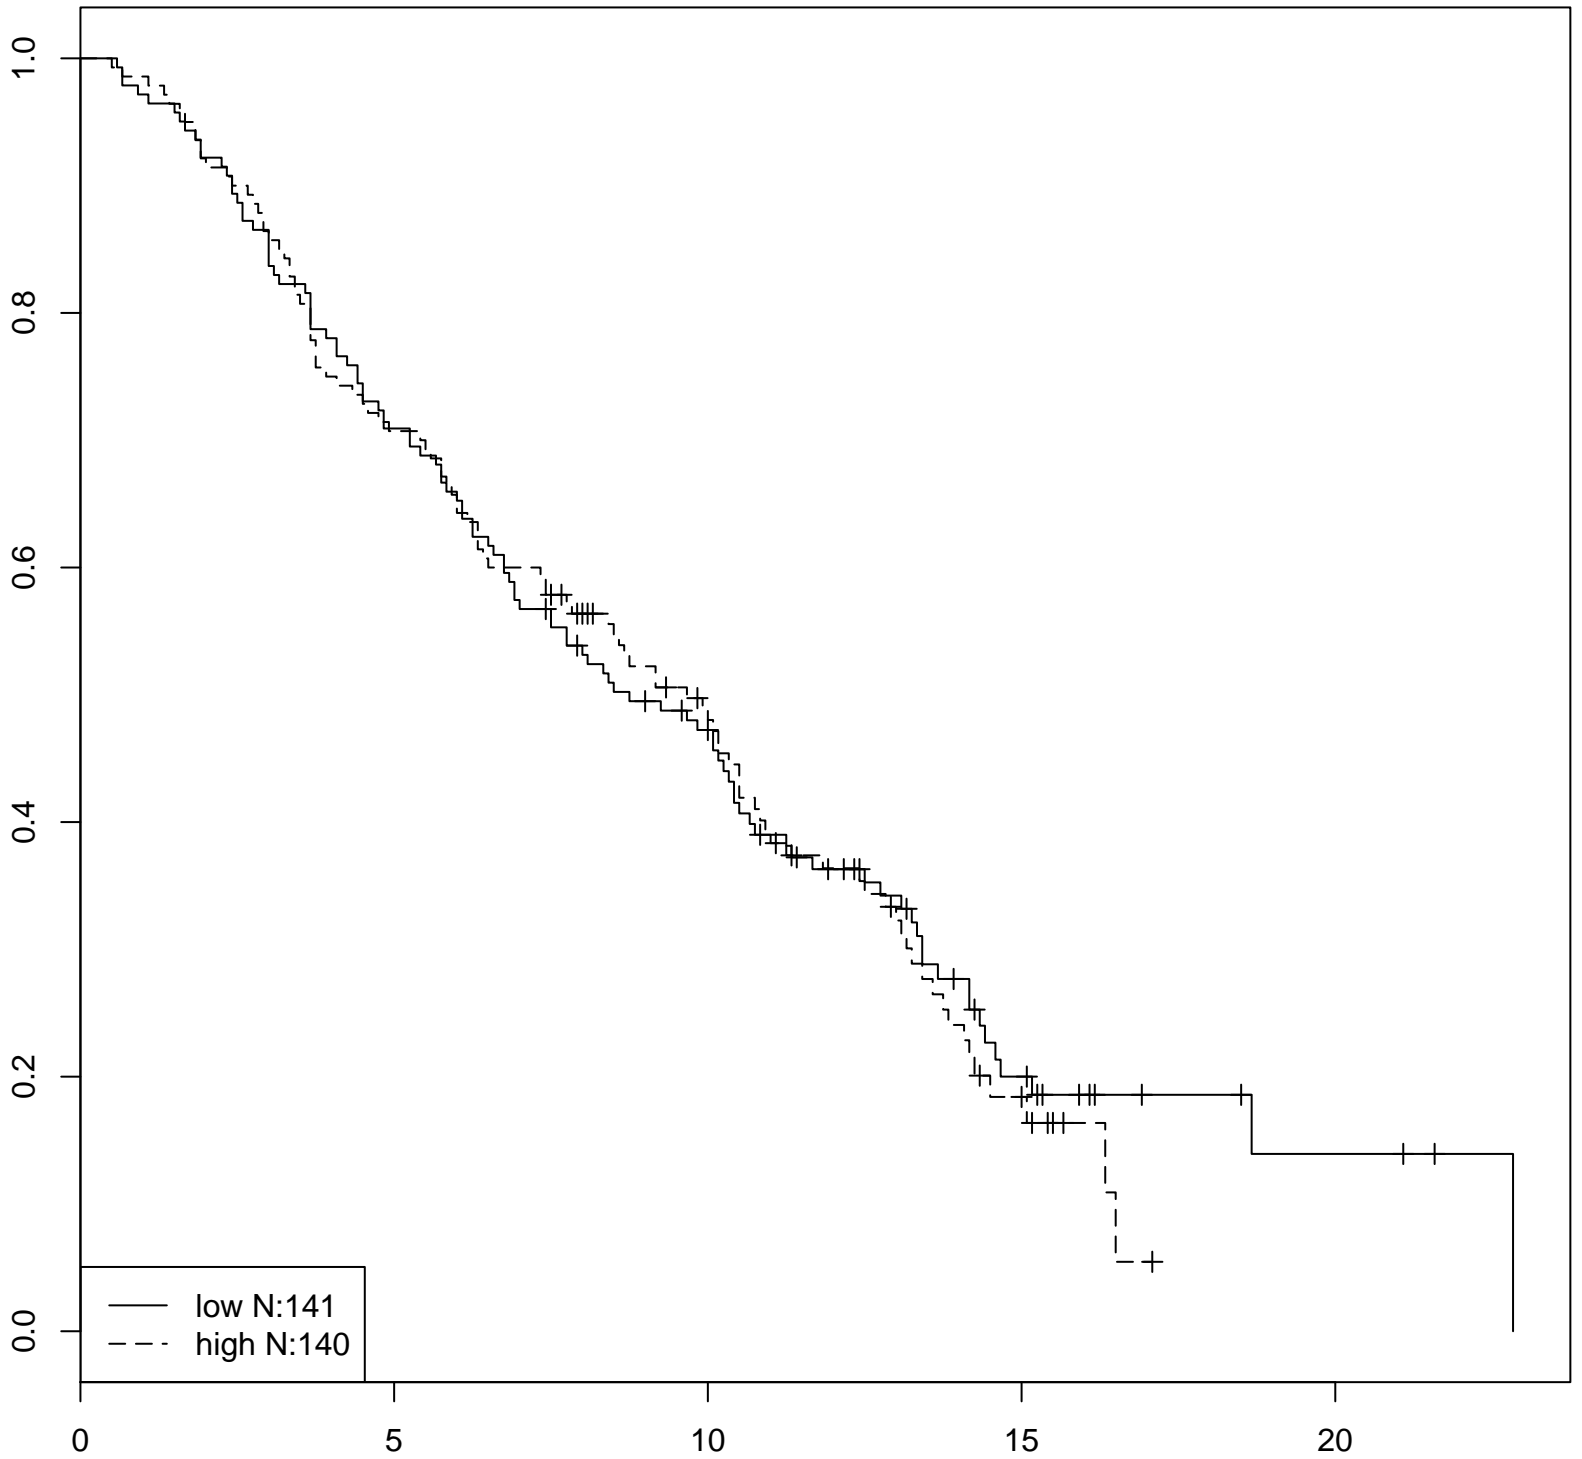

years

log-rank test p-value = 0.707

# Survival by PECAM1 expression

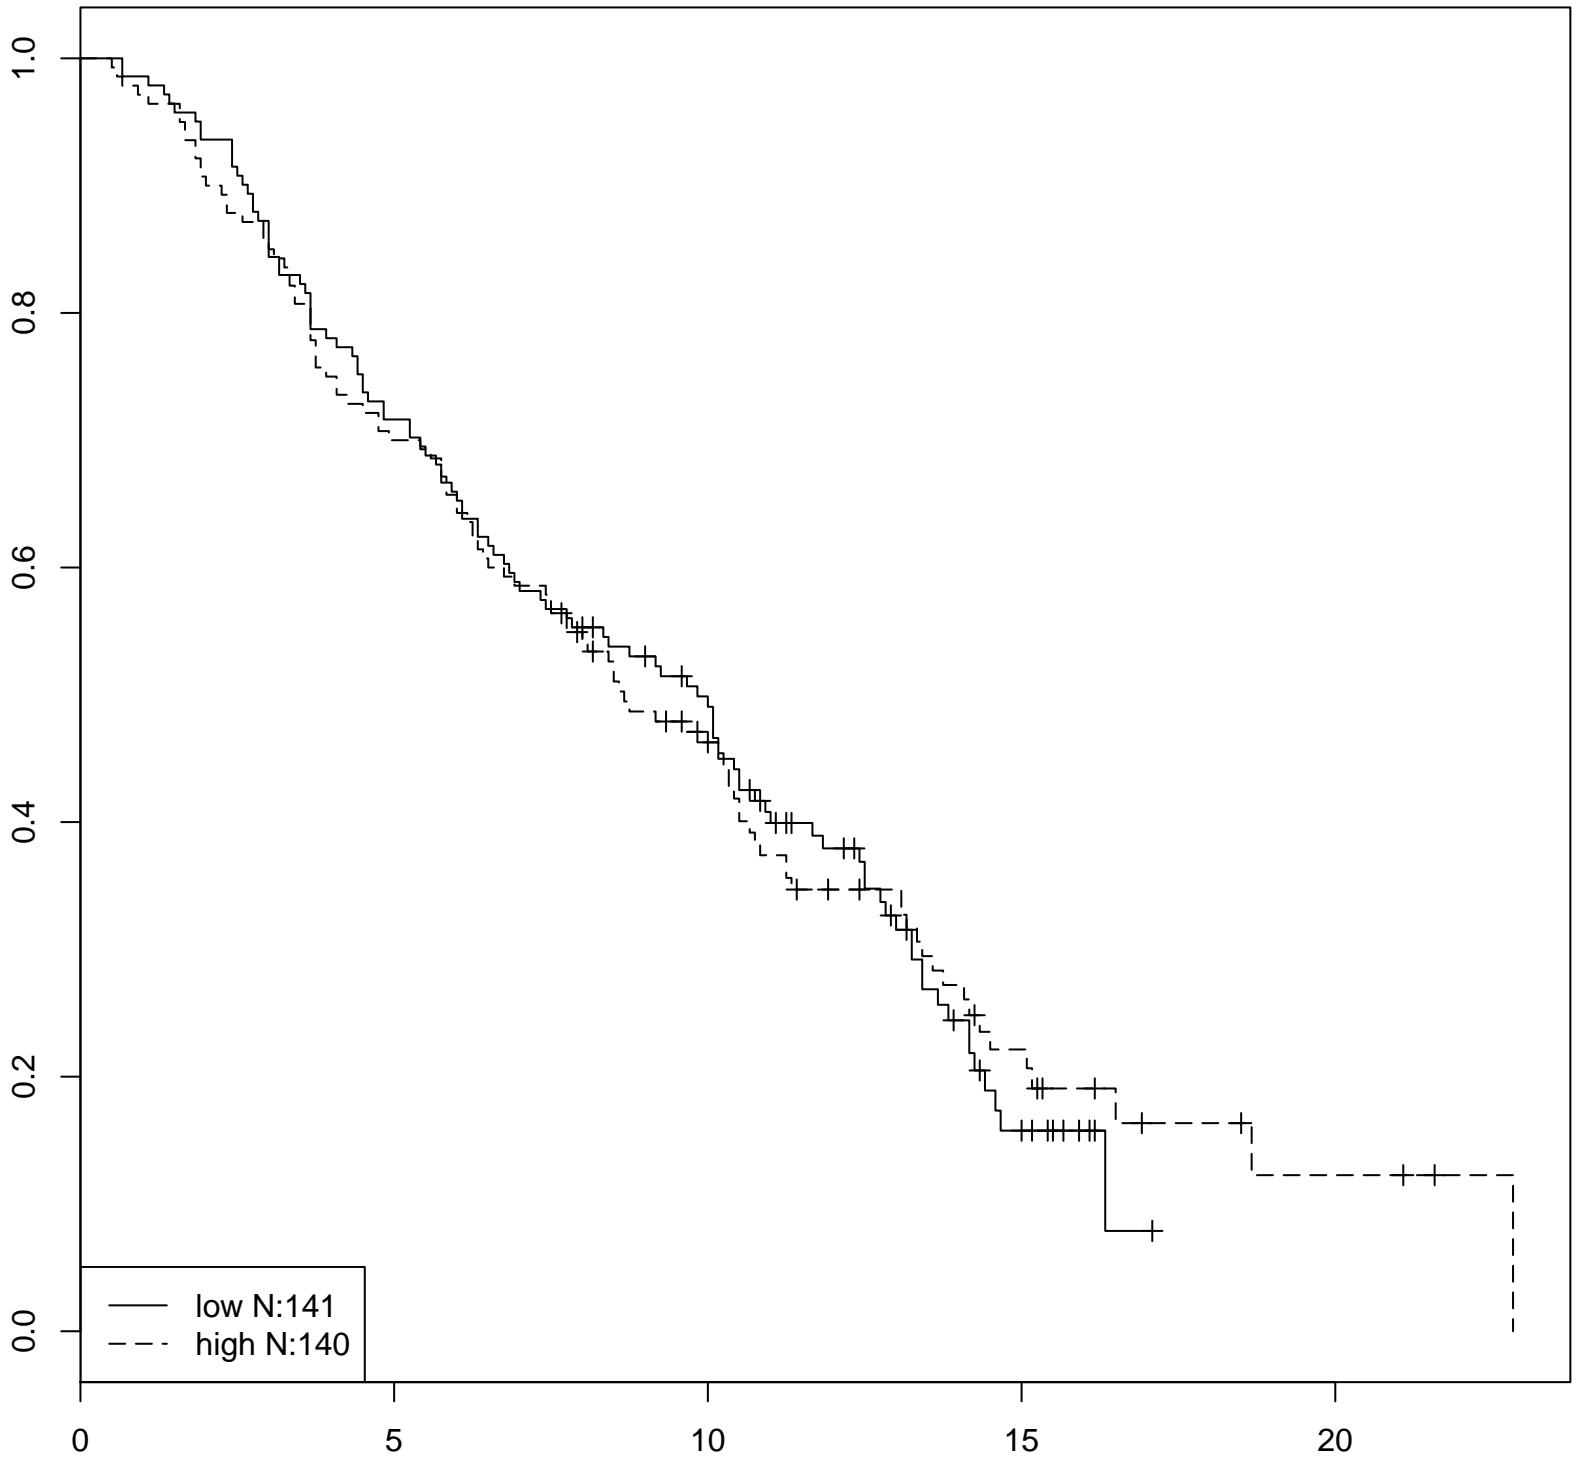

years

log-rank test p-value = 0.868



# Survival by PGC expression

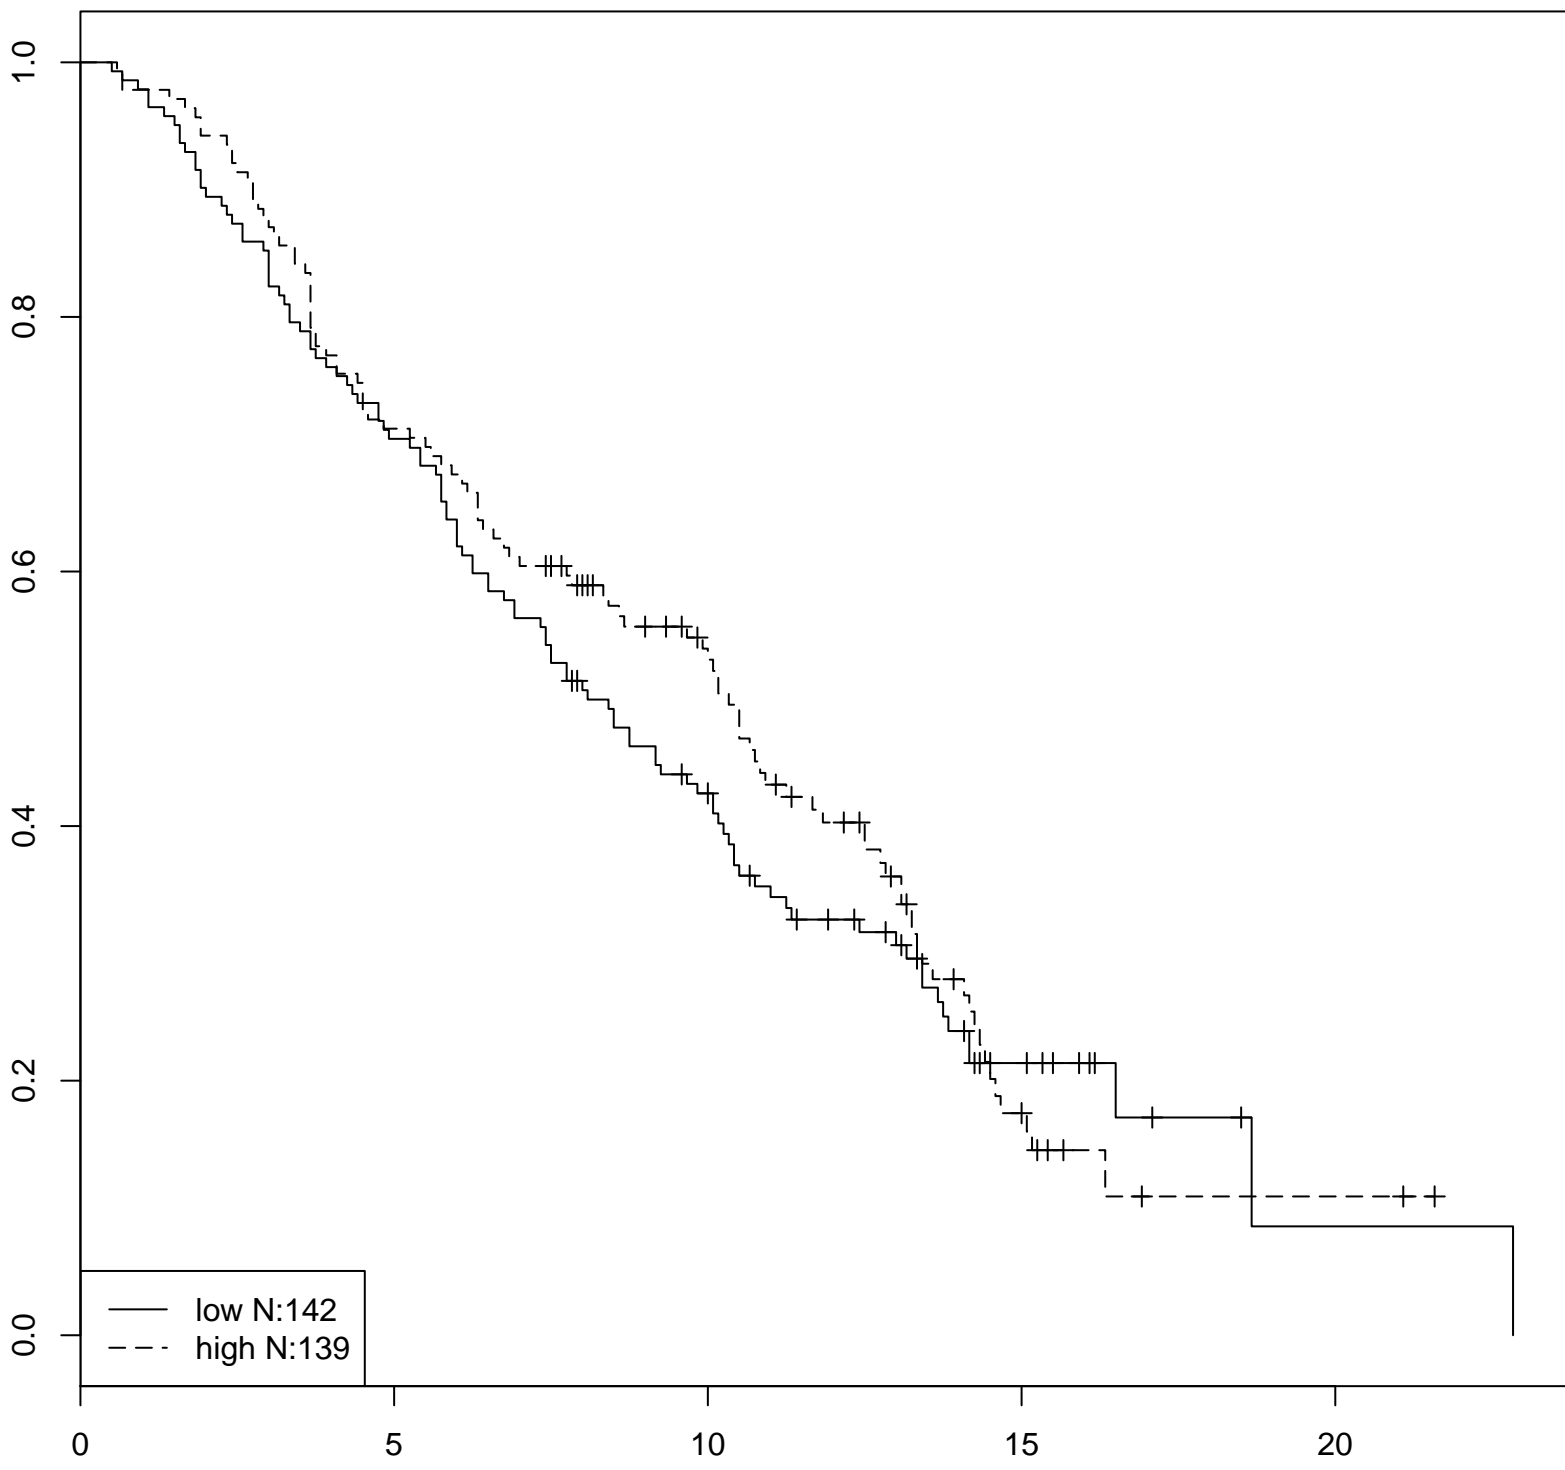

years

log-rank test p-value = 0.479

# Survival by PGK1 expression

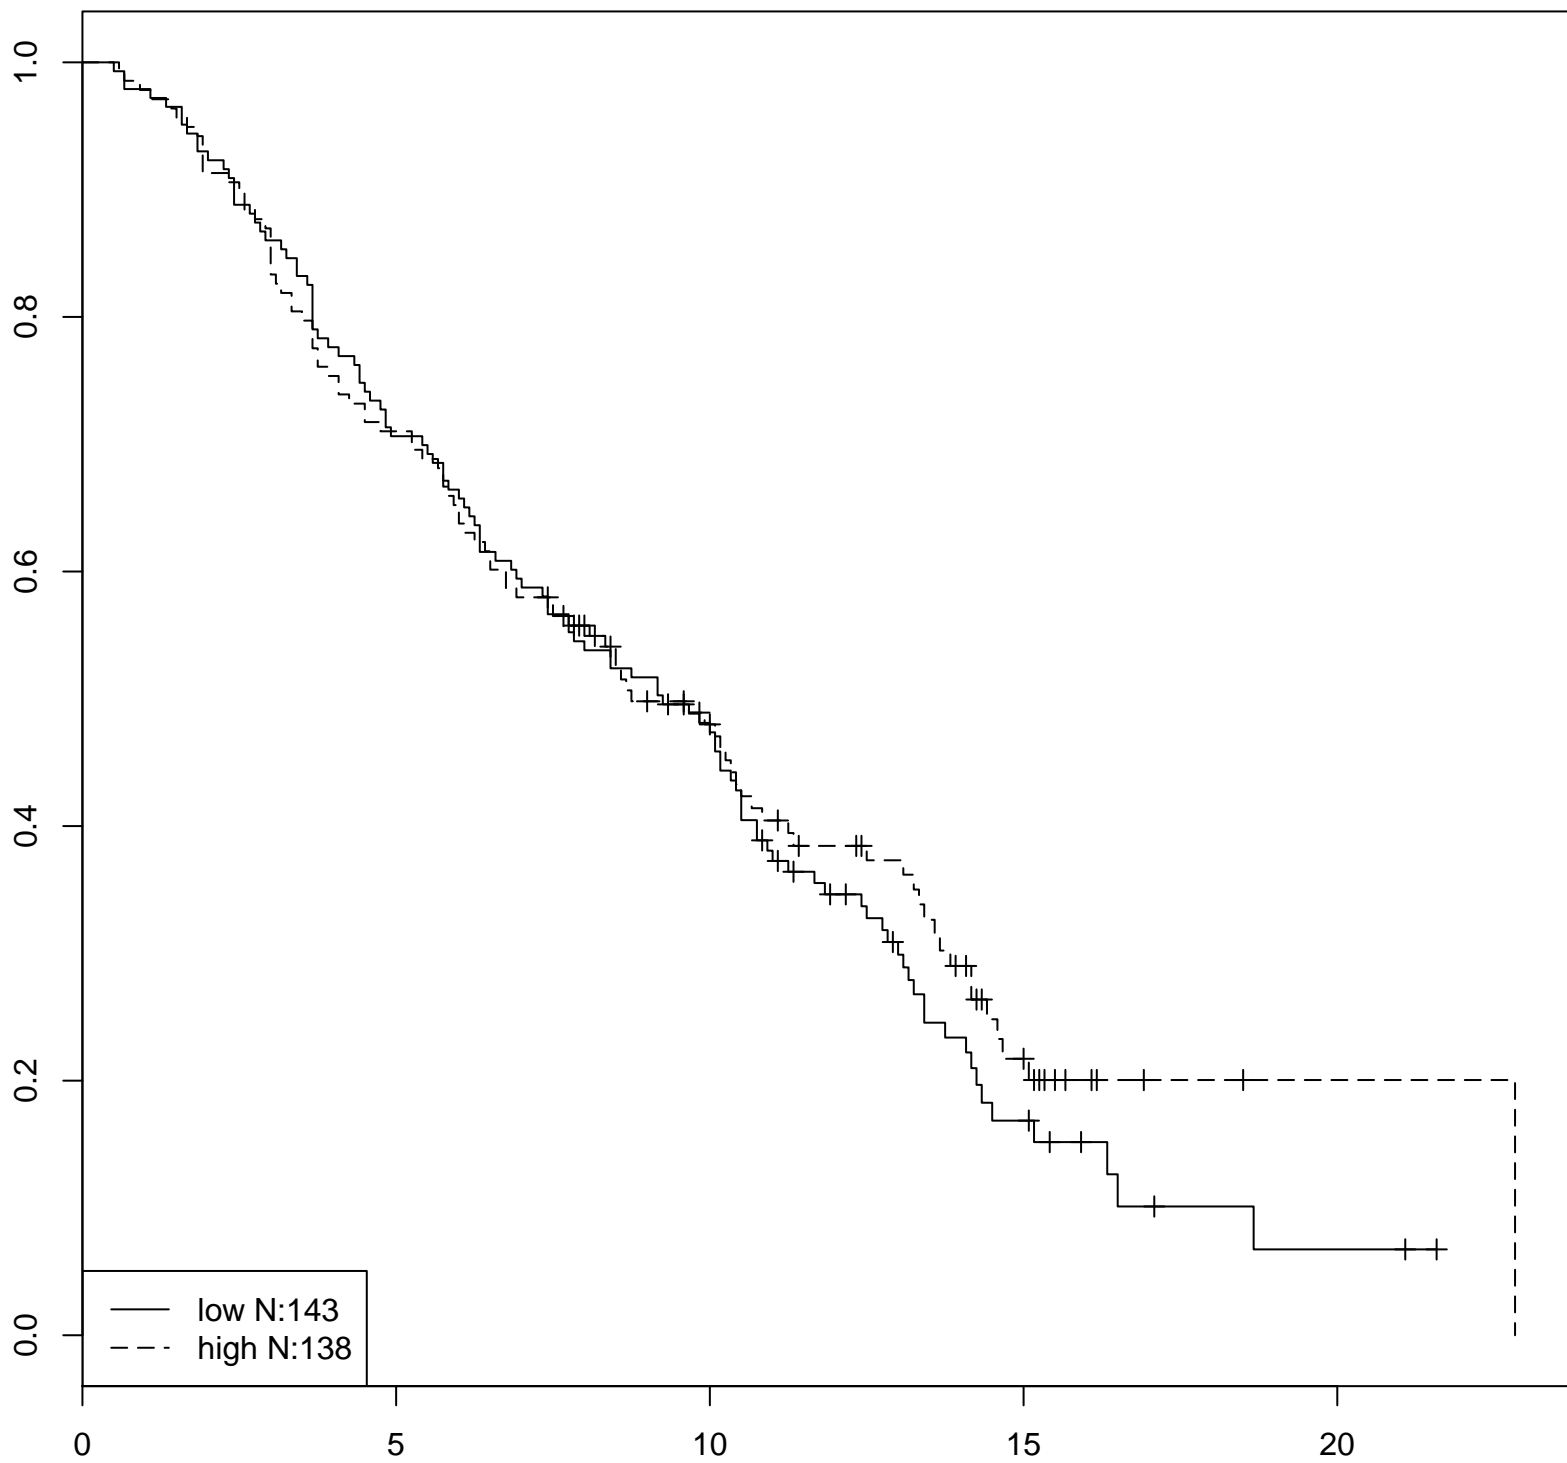

# Survival by PIM1 expression

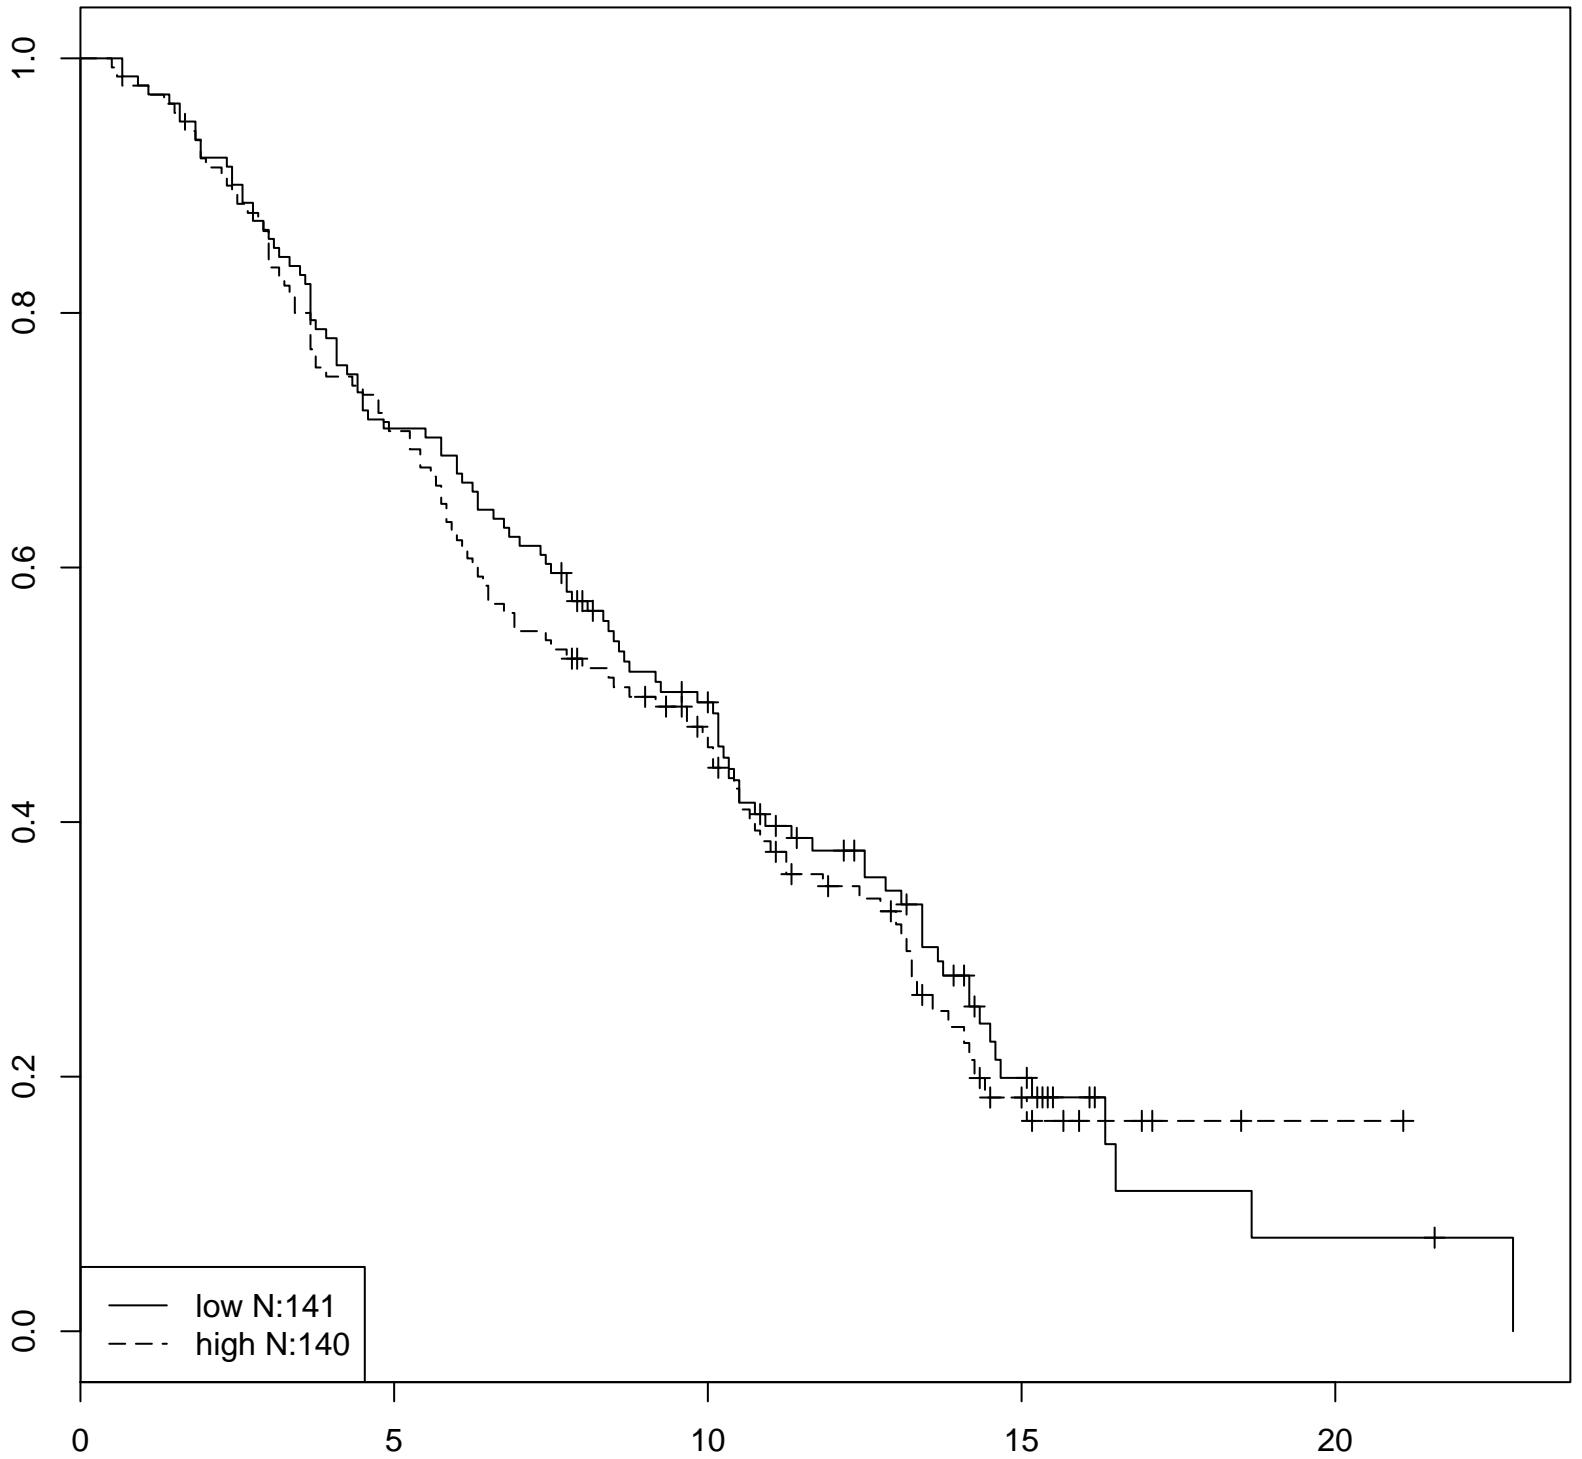

years

log-rank test p-value = 0.609

# Survival by PIN1 expression

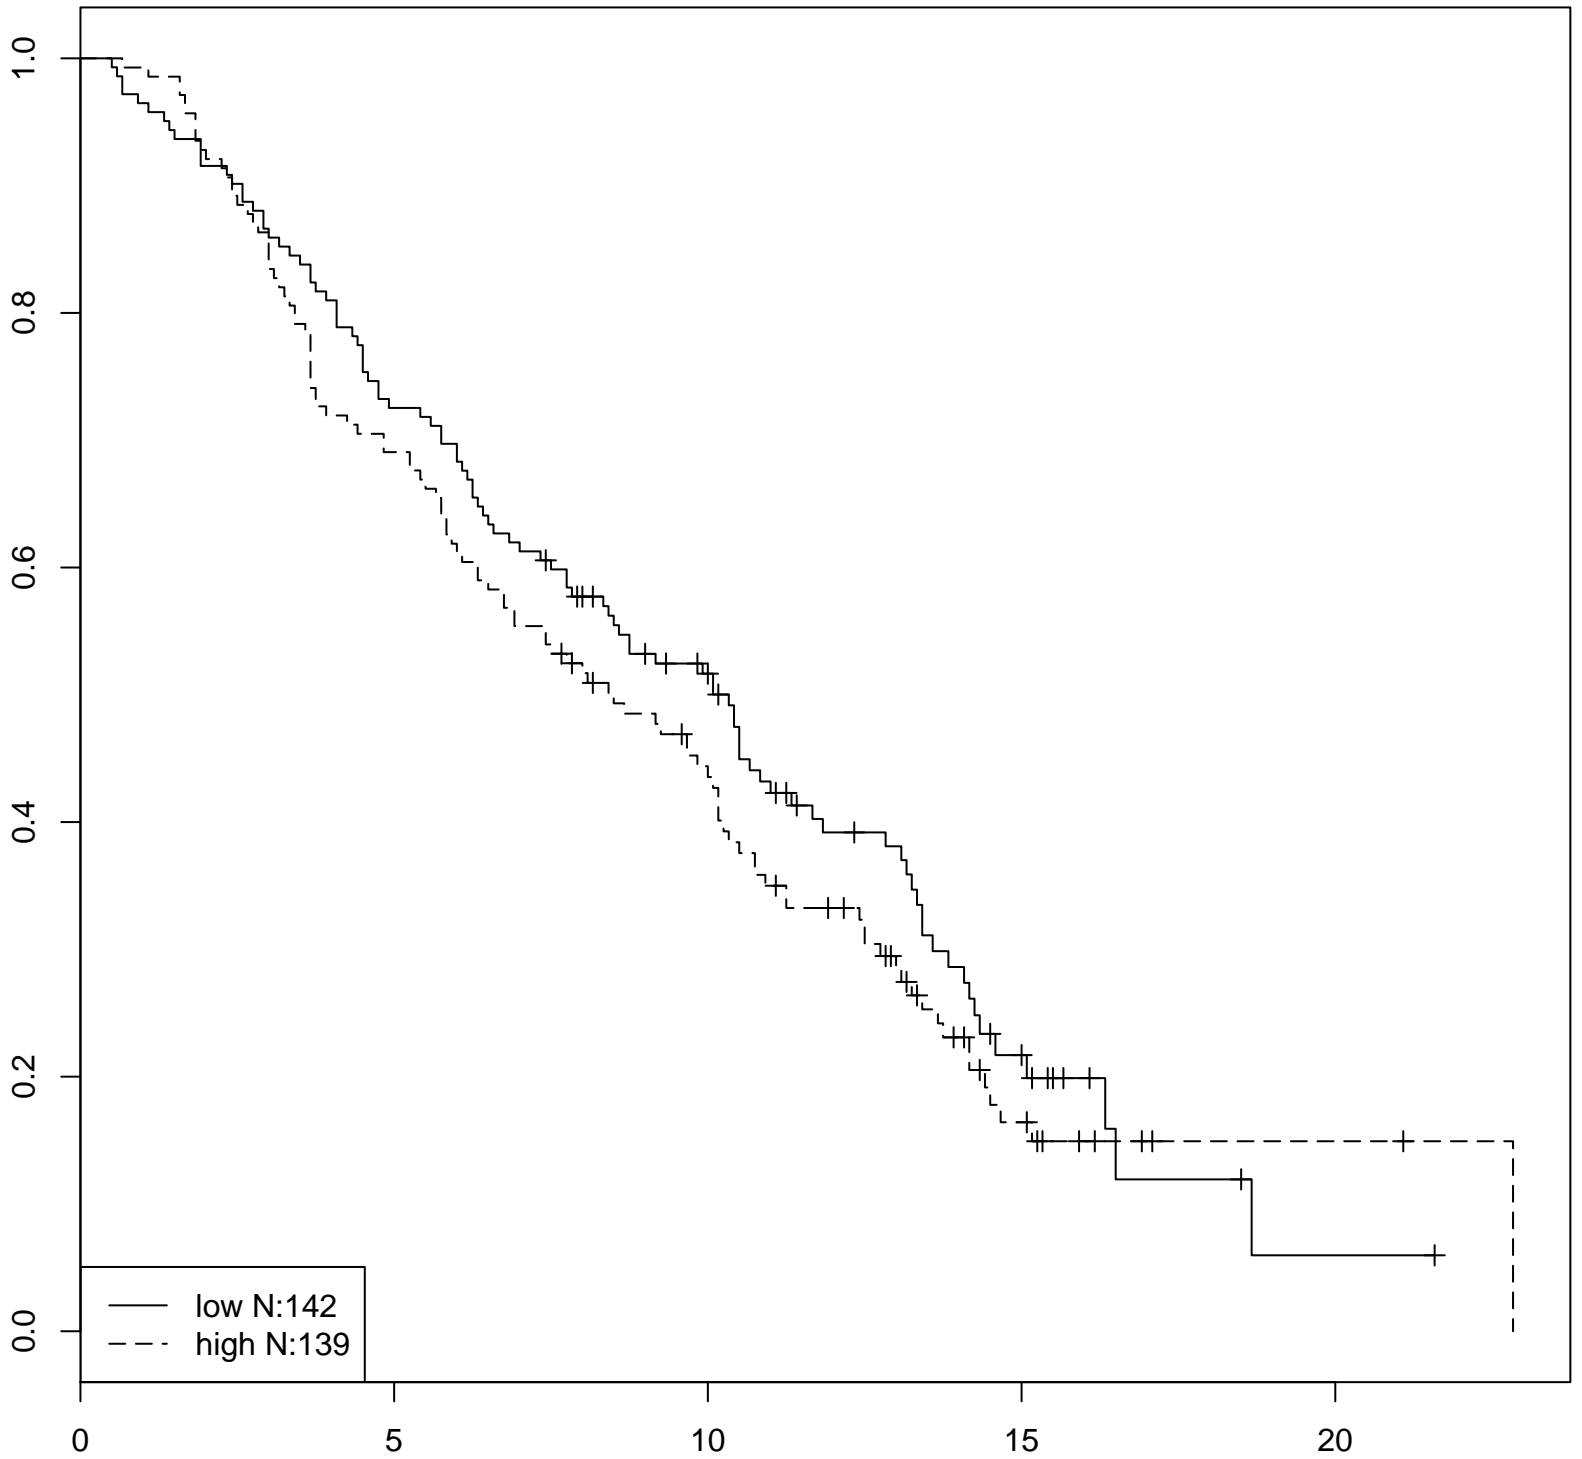

years

log-rank test p-value = 0.271

# Survival by PITX2 expression

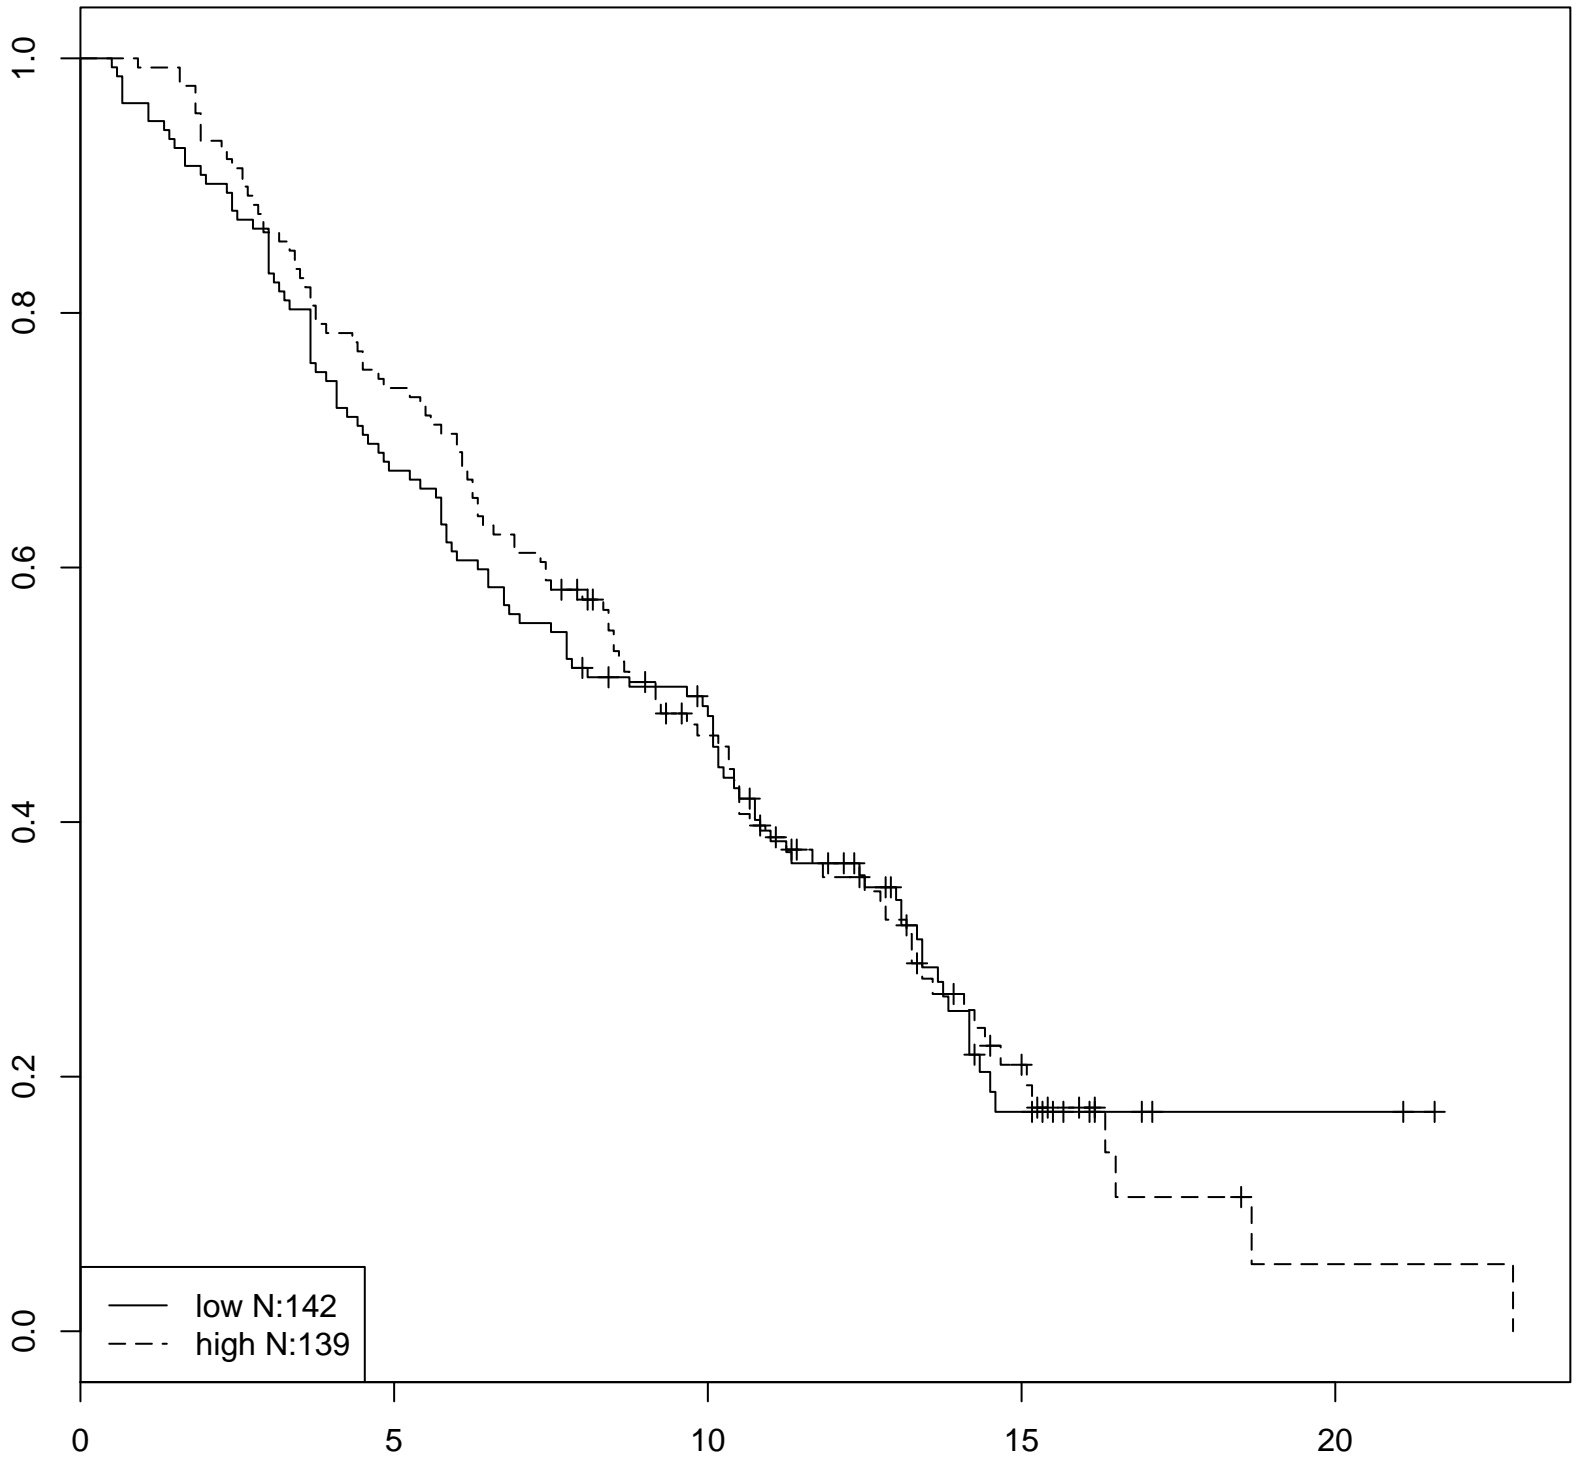

years

log-rank test p-value = 0.862

# Survival by PLA2G2A expression

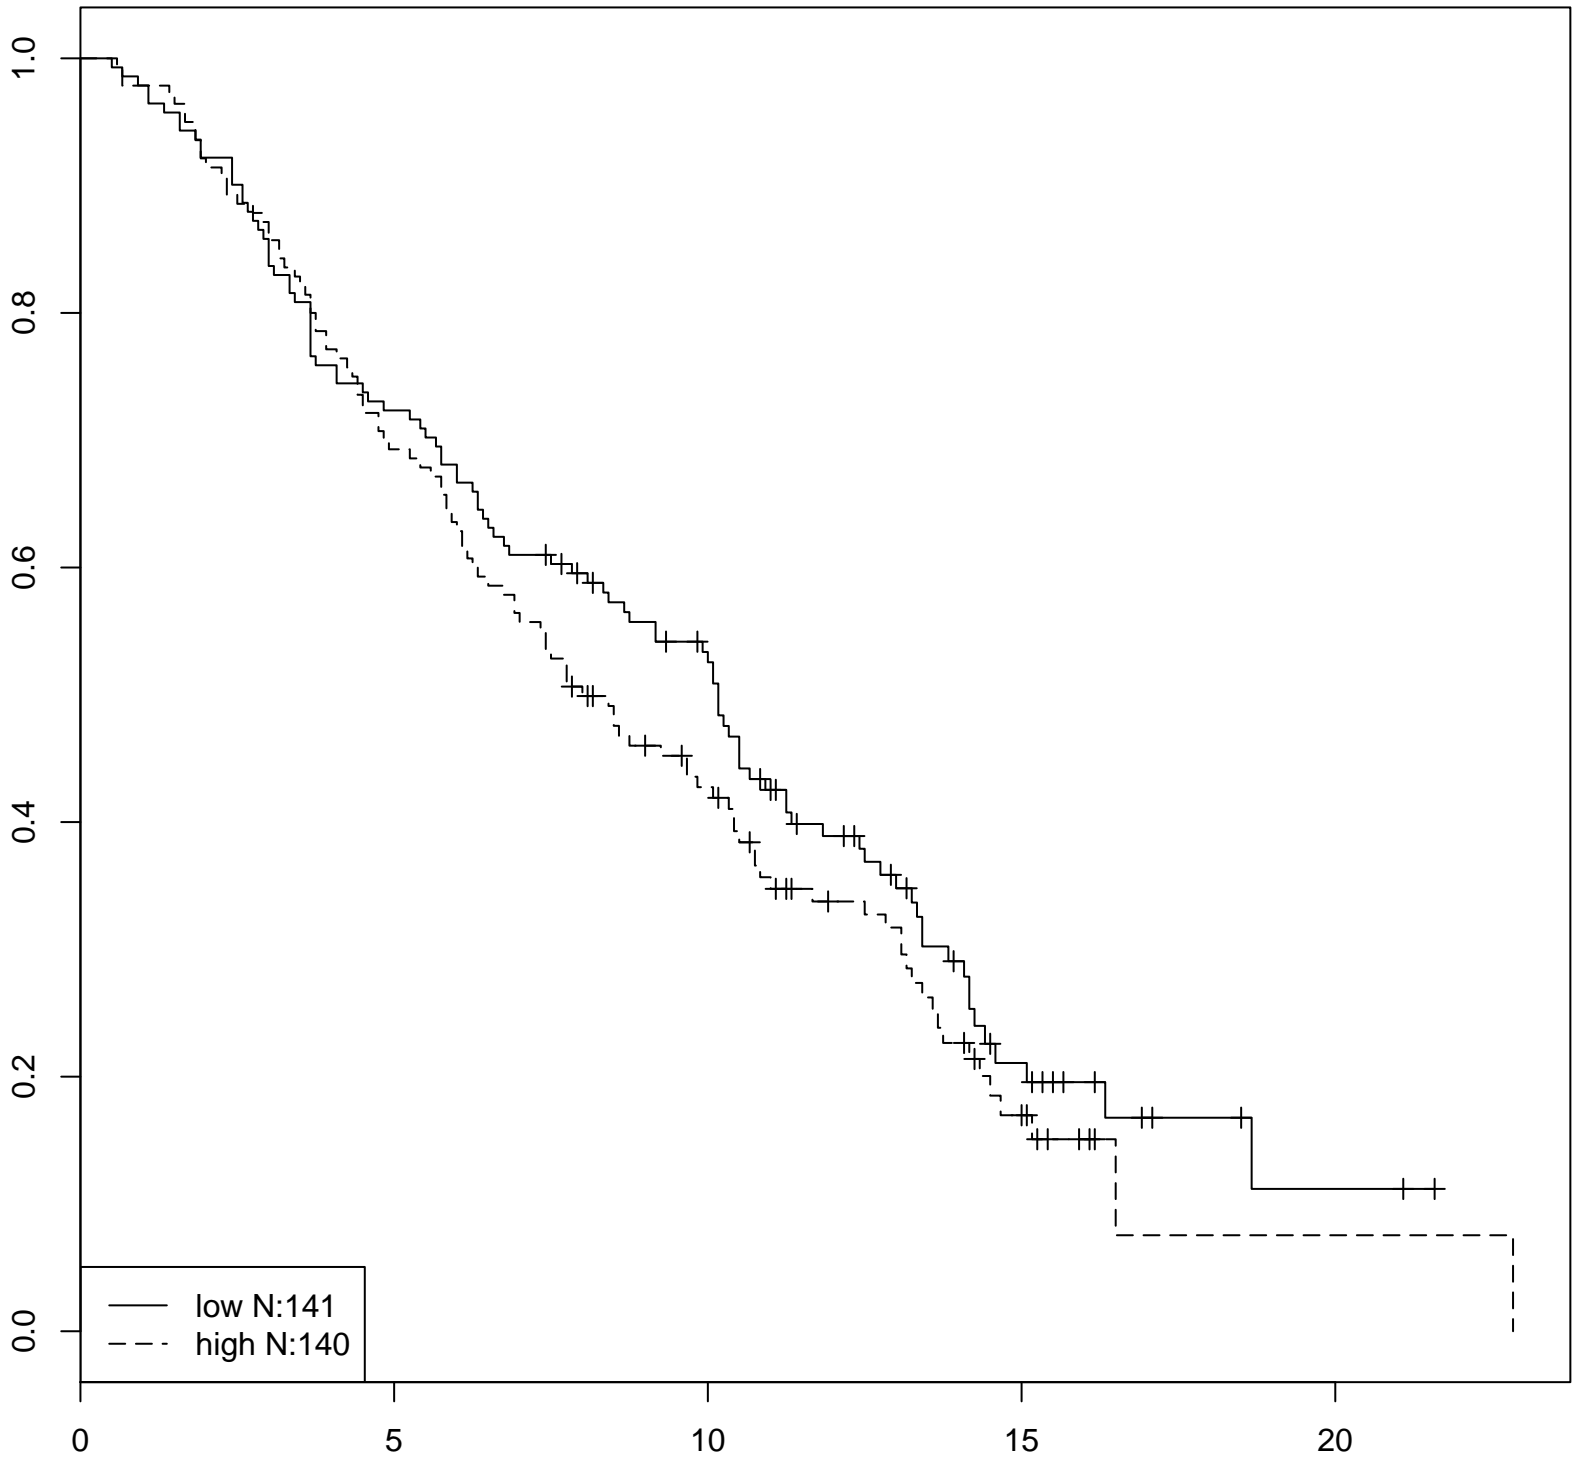

years

log-rank test p-value = 0.262

# Survival by PLAU expression

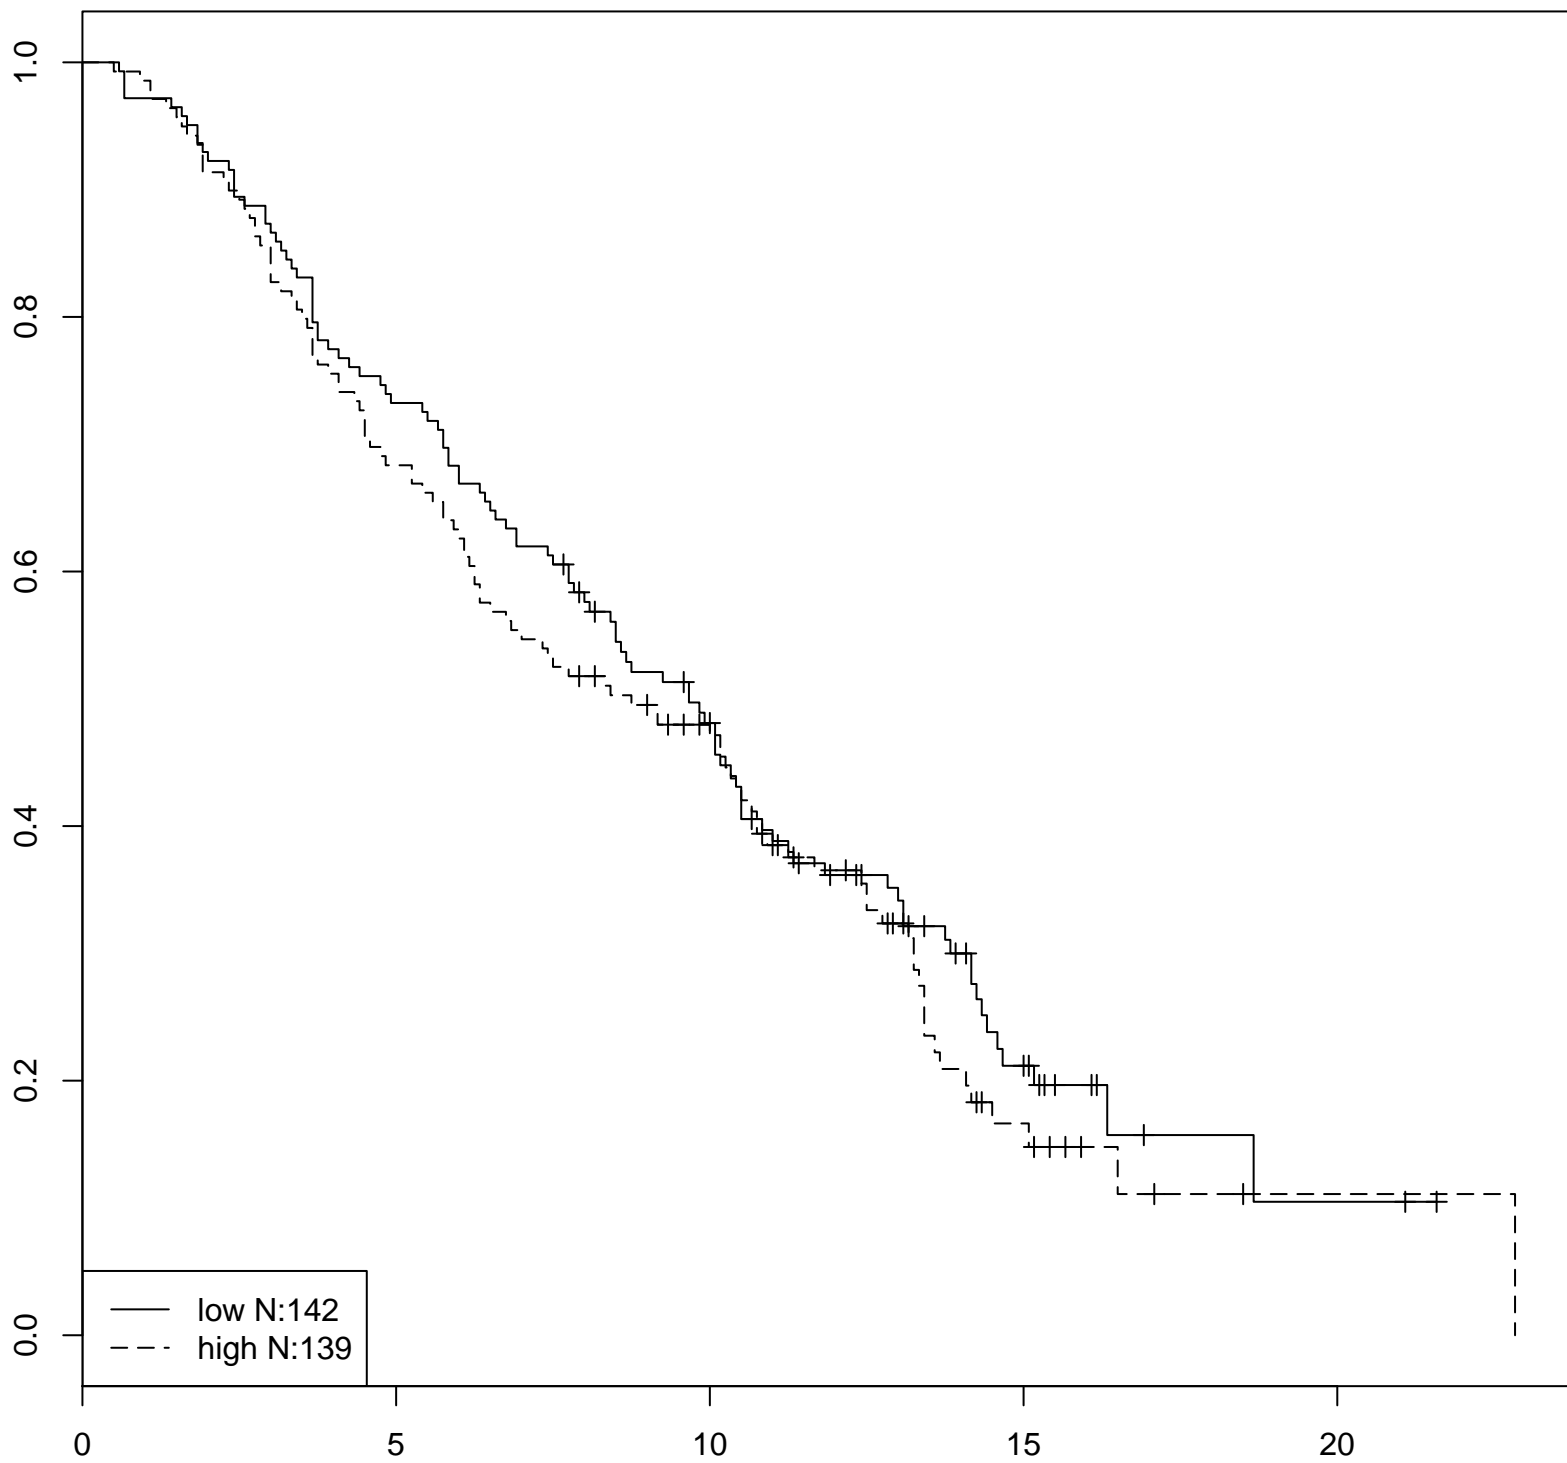

years

log-rank test p-value = 0.359

# Survival by PLAUR expression

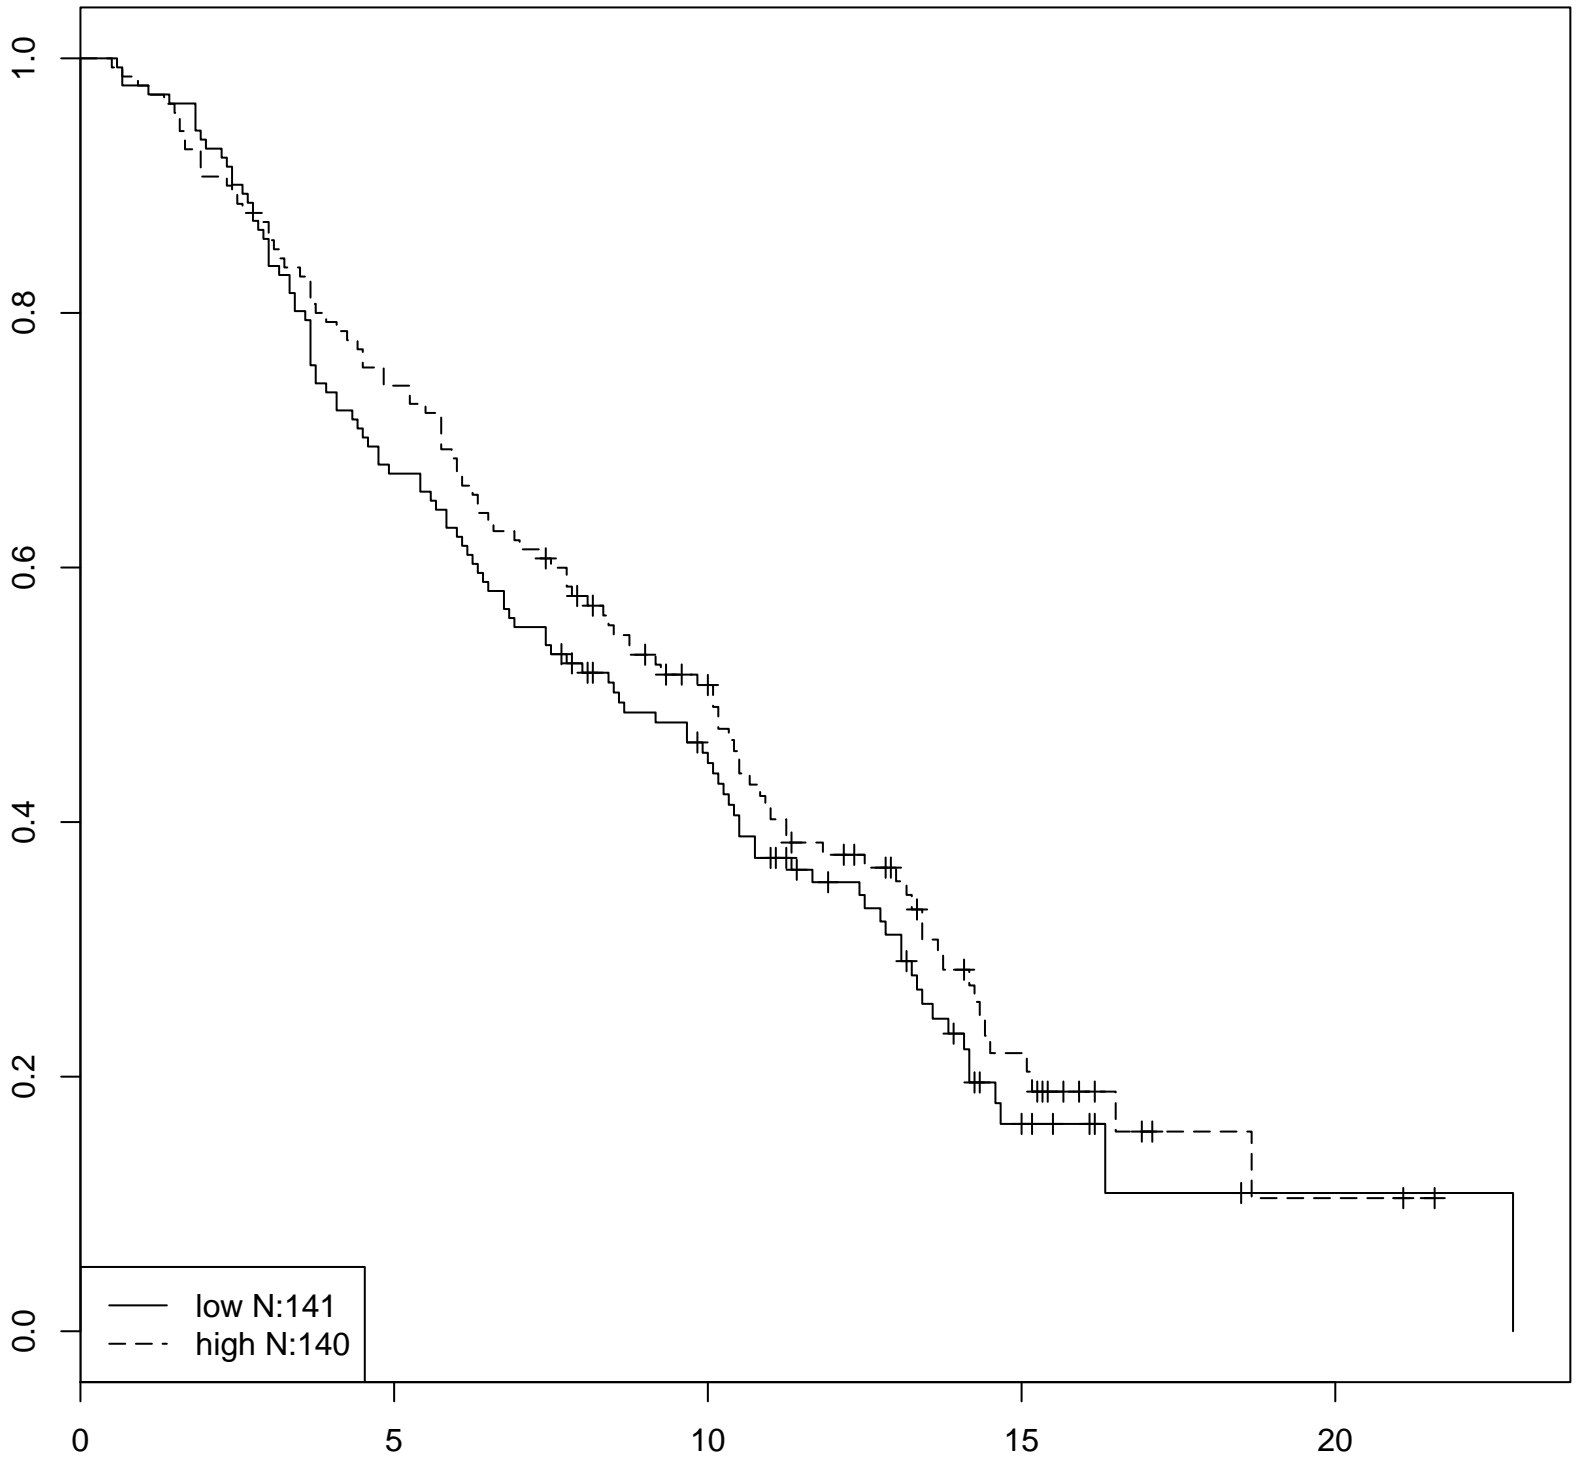

years

log-rank test p-value = 0.332



# Survival by POSTN expression

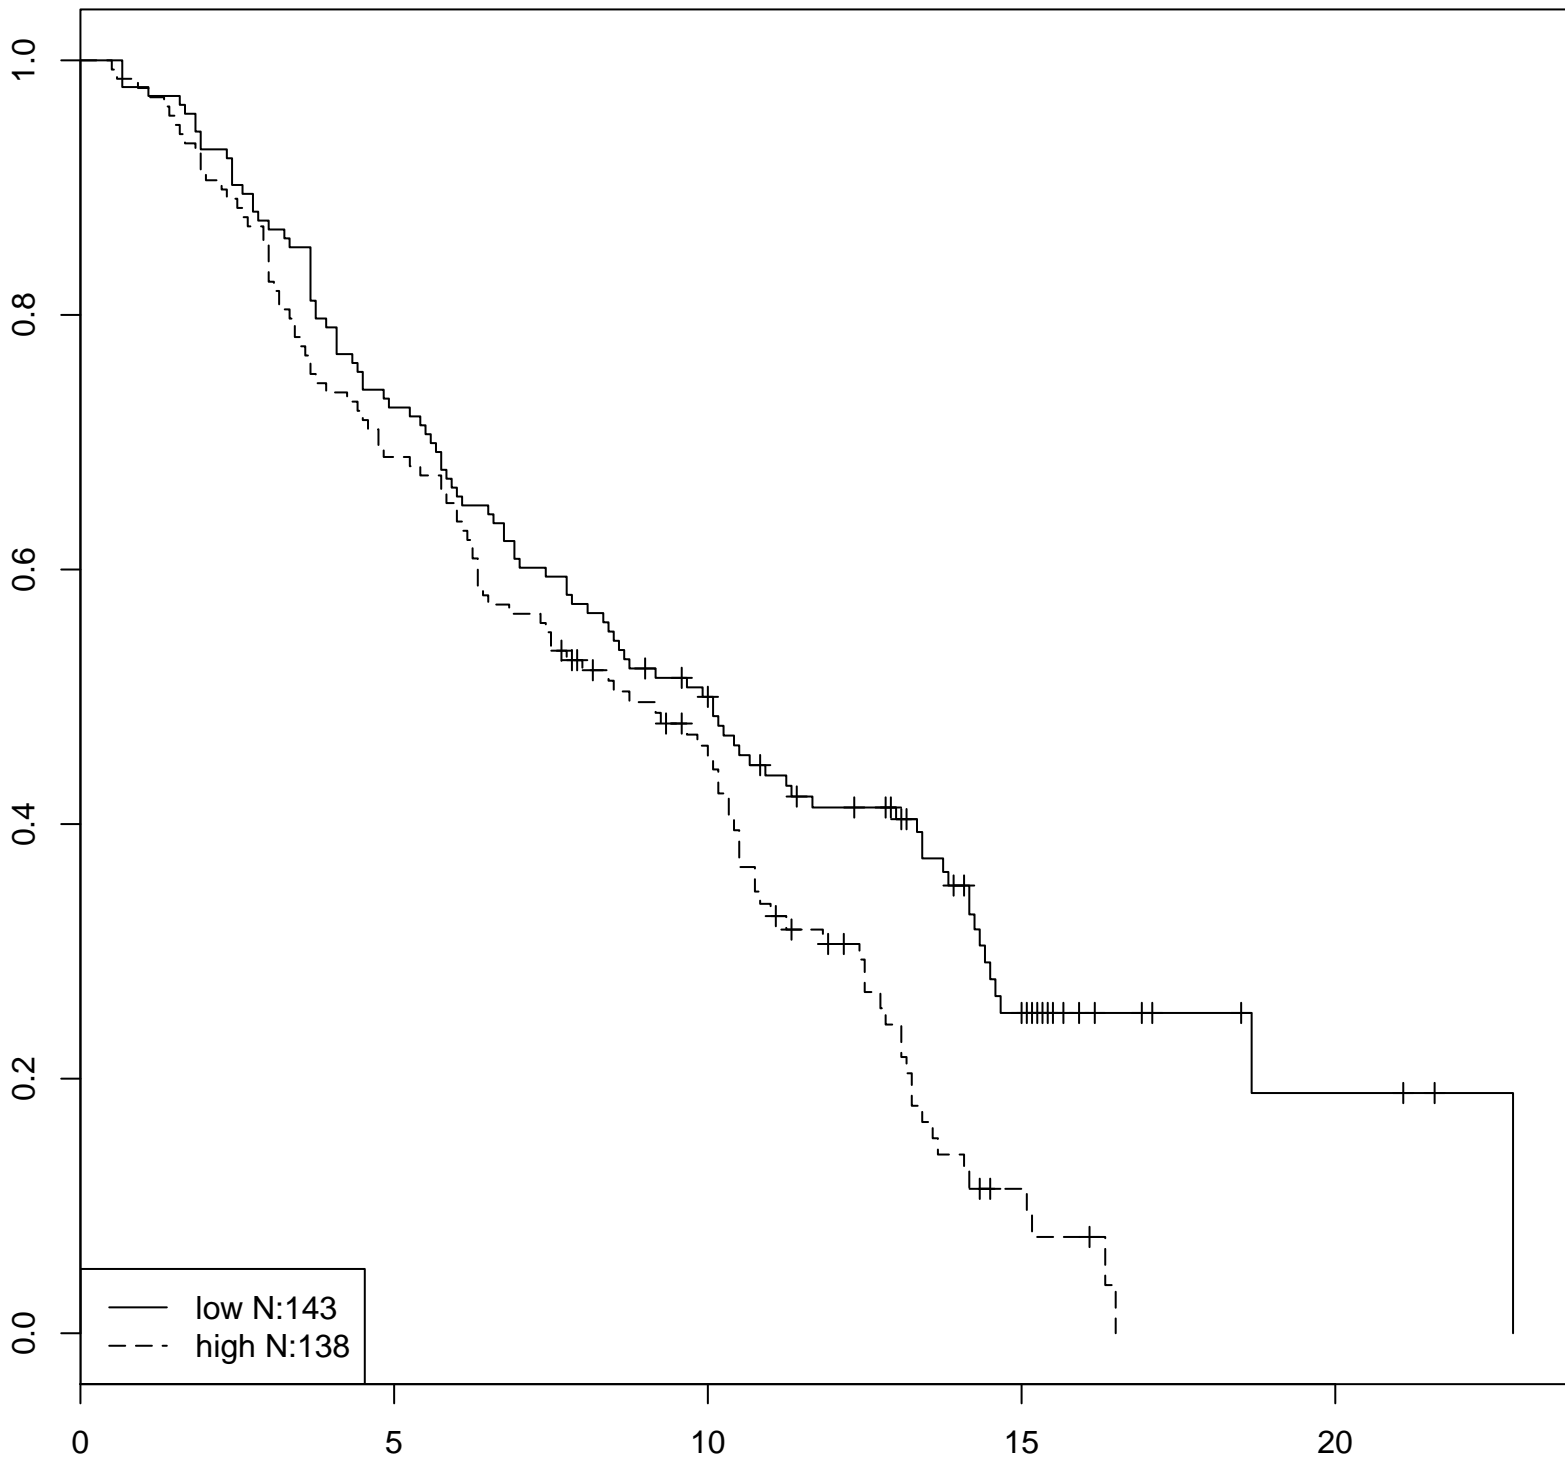

years

log-rank test p-value = 0.004

# Survival by PPP2CB expression

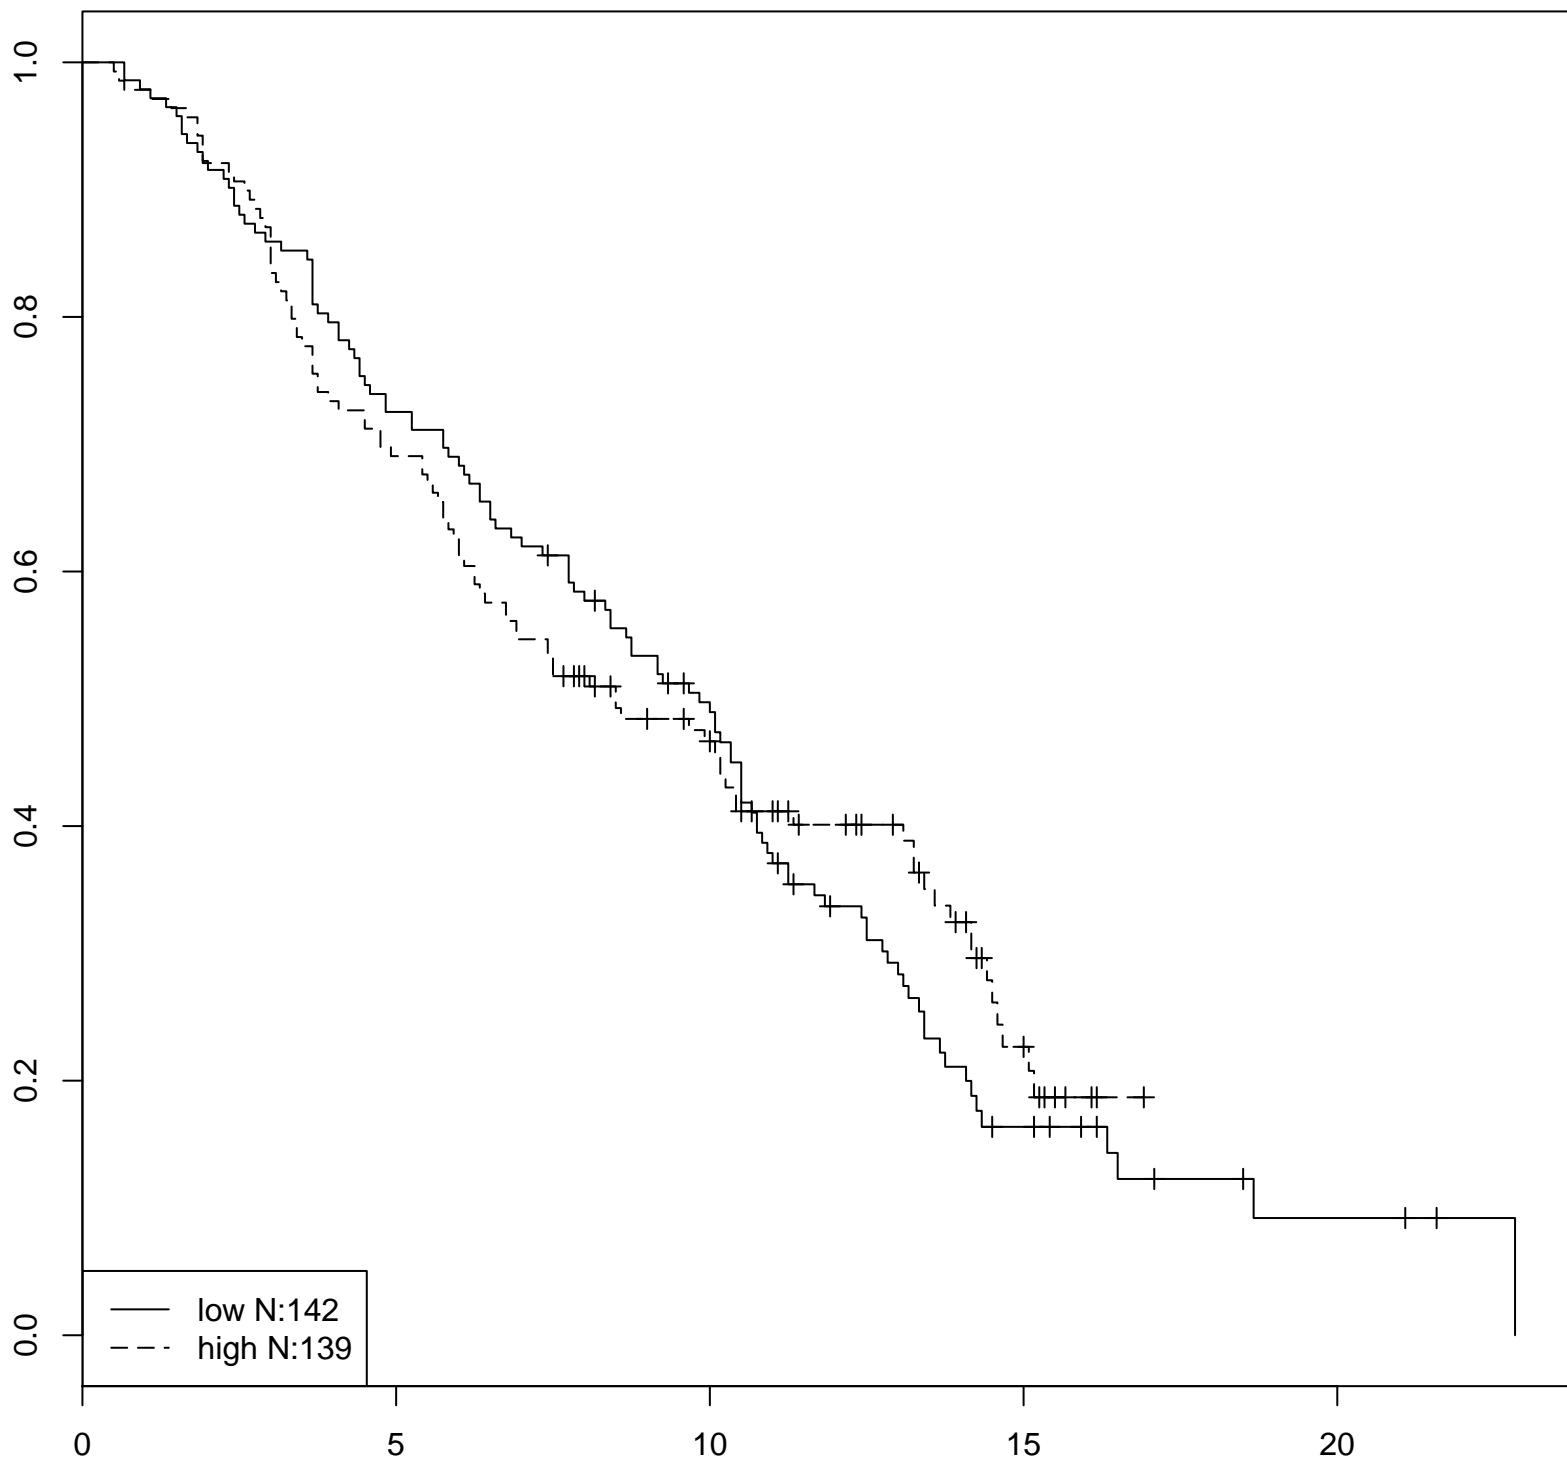

years

log-rank test p-value = 0.617

# Survival by PRDX4 expression

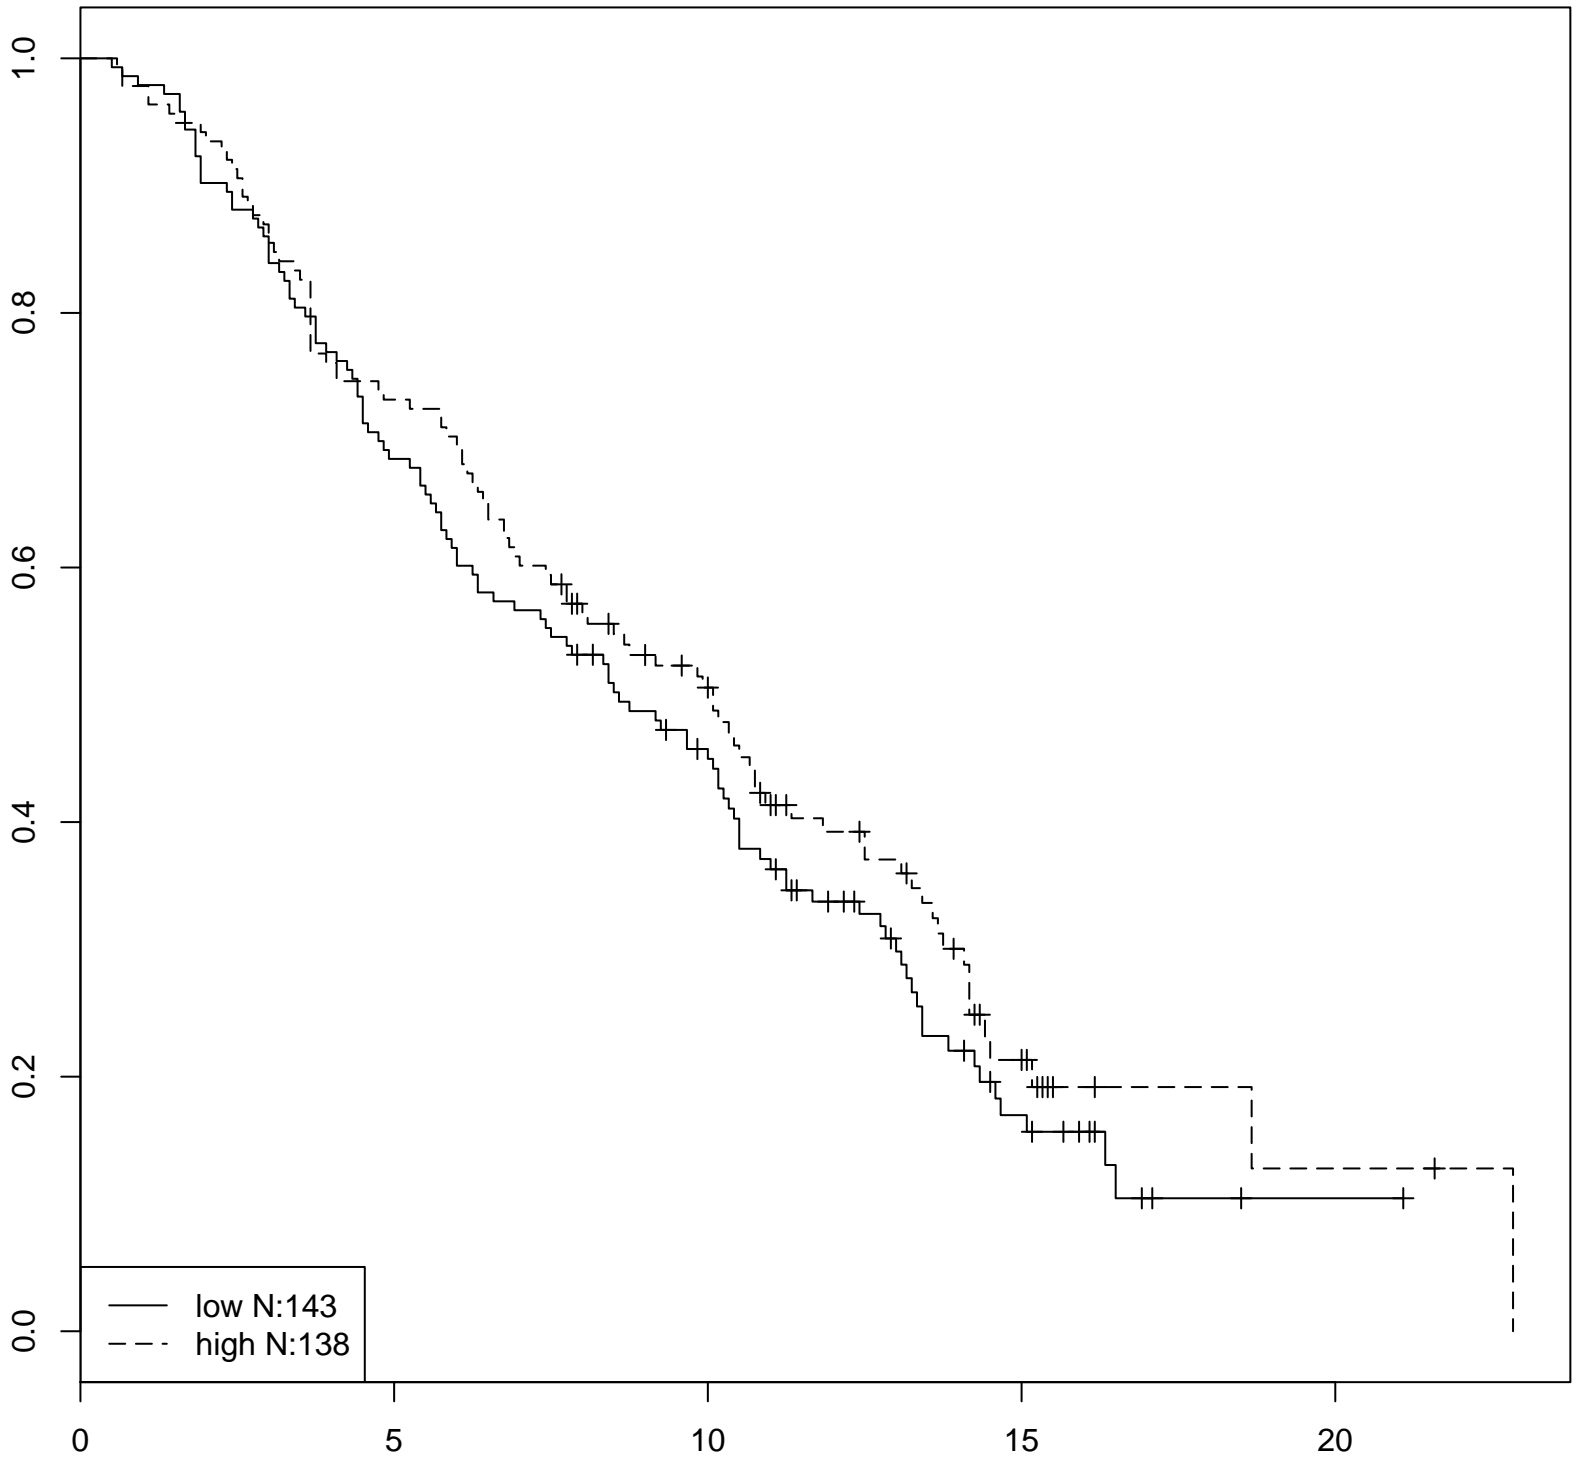

years

log-rank test p-value = 0.251

# Survival by PRKACA expression

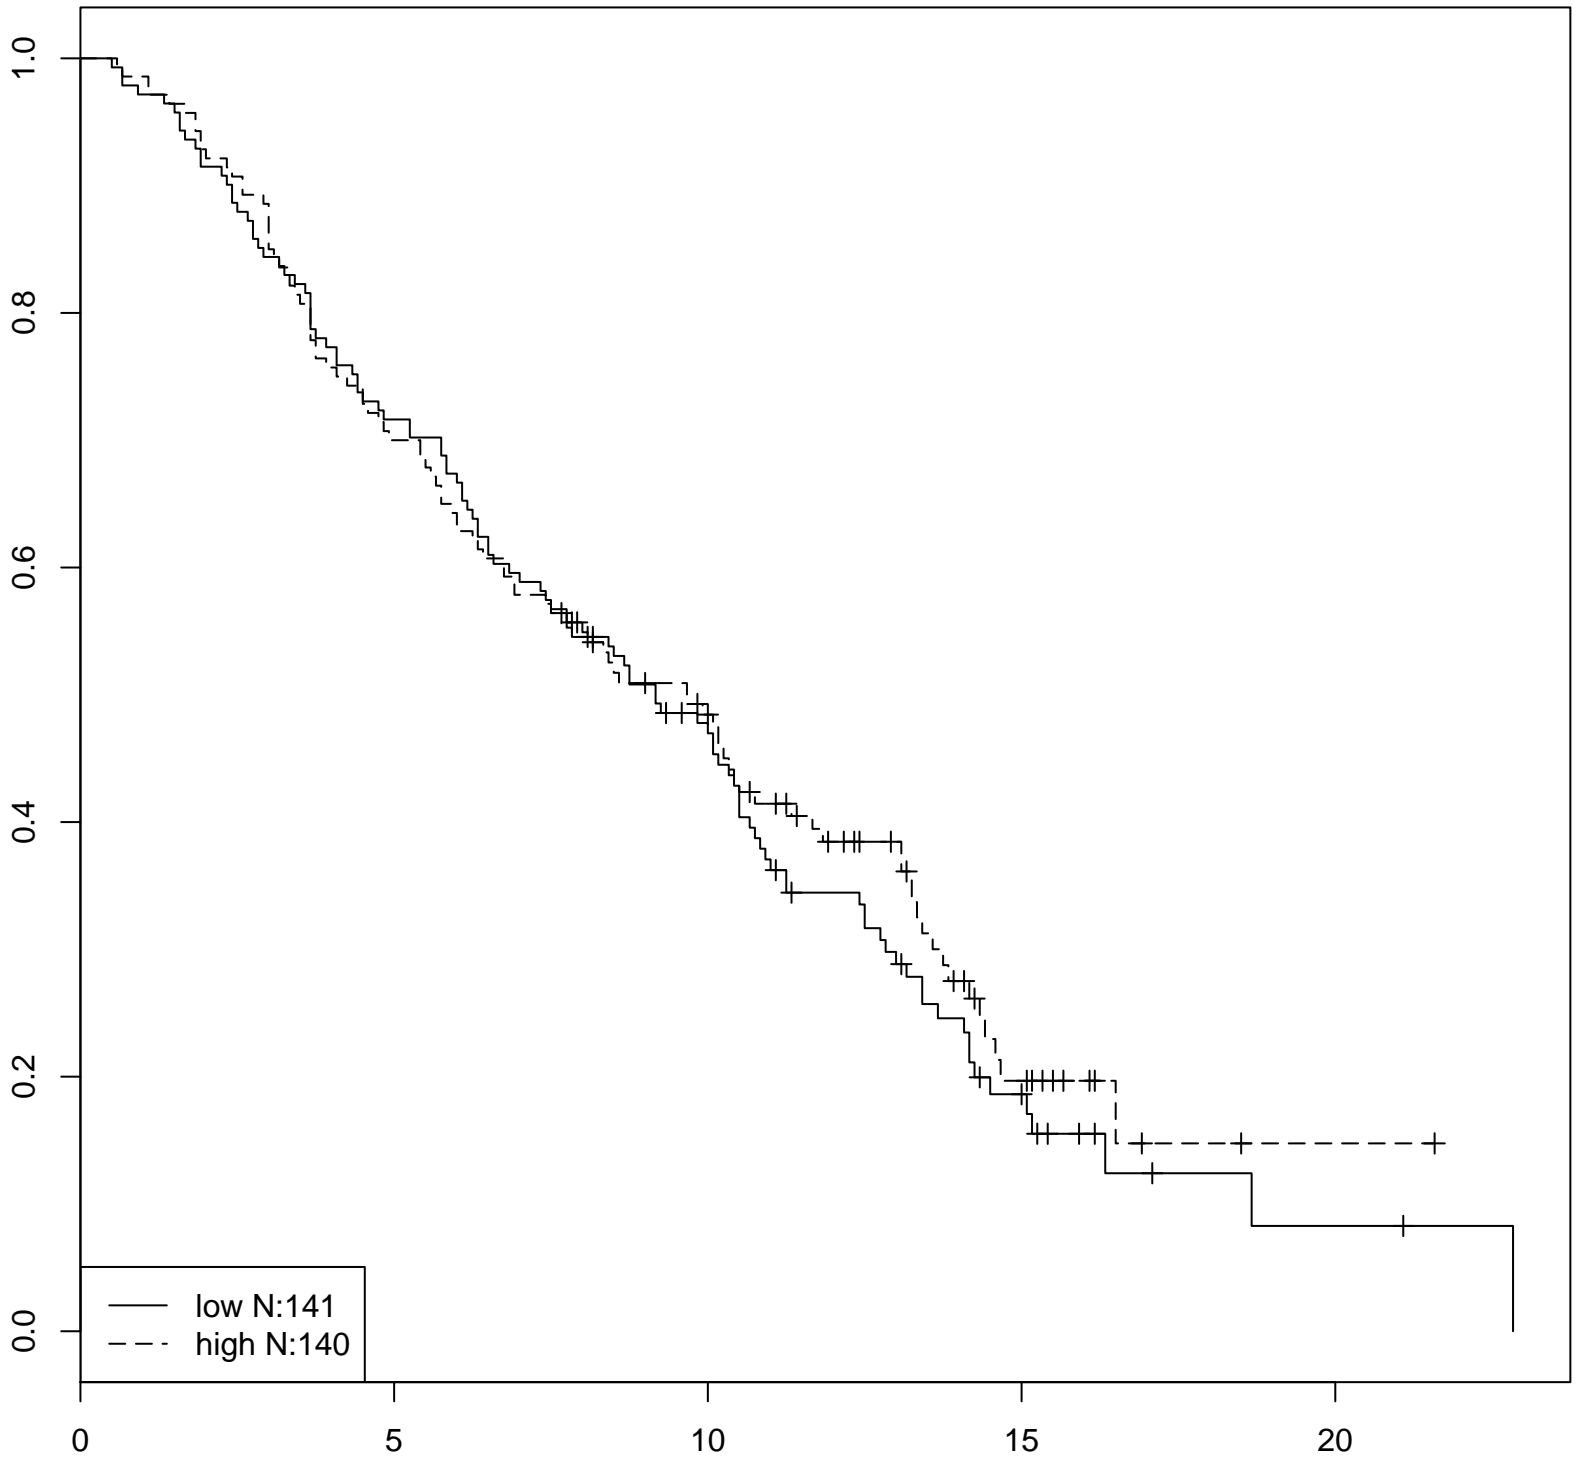

years

log-rank test p-value = 0.514

# Survival by PRKCE expression

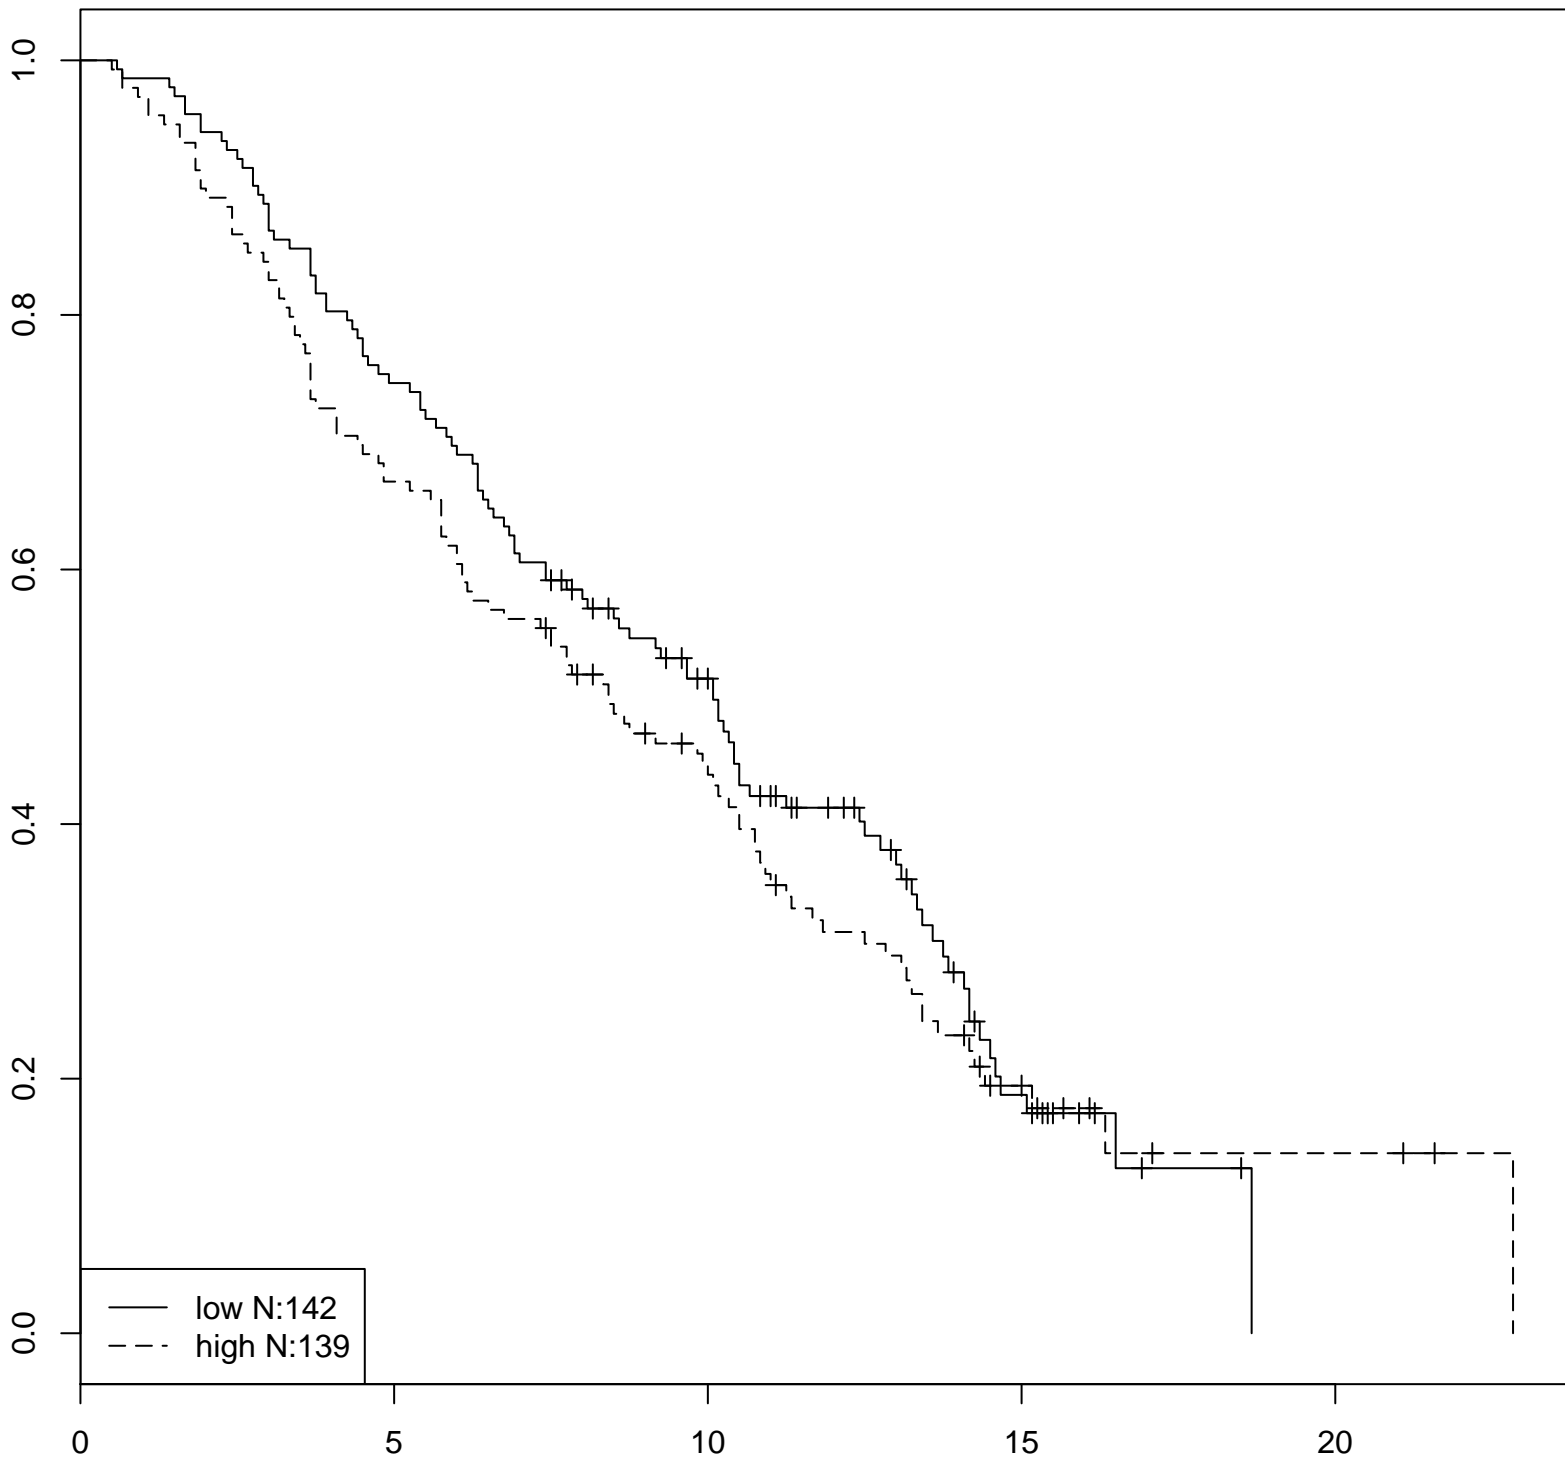

log-rank test p-value = 0.342

# Survival by PRSS8 expression

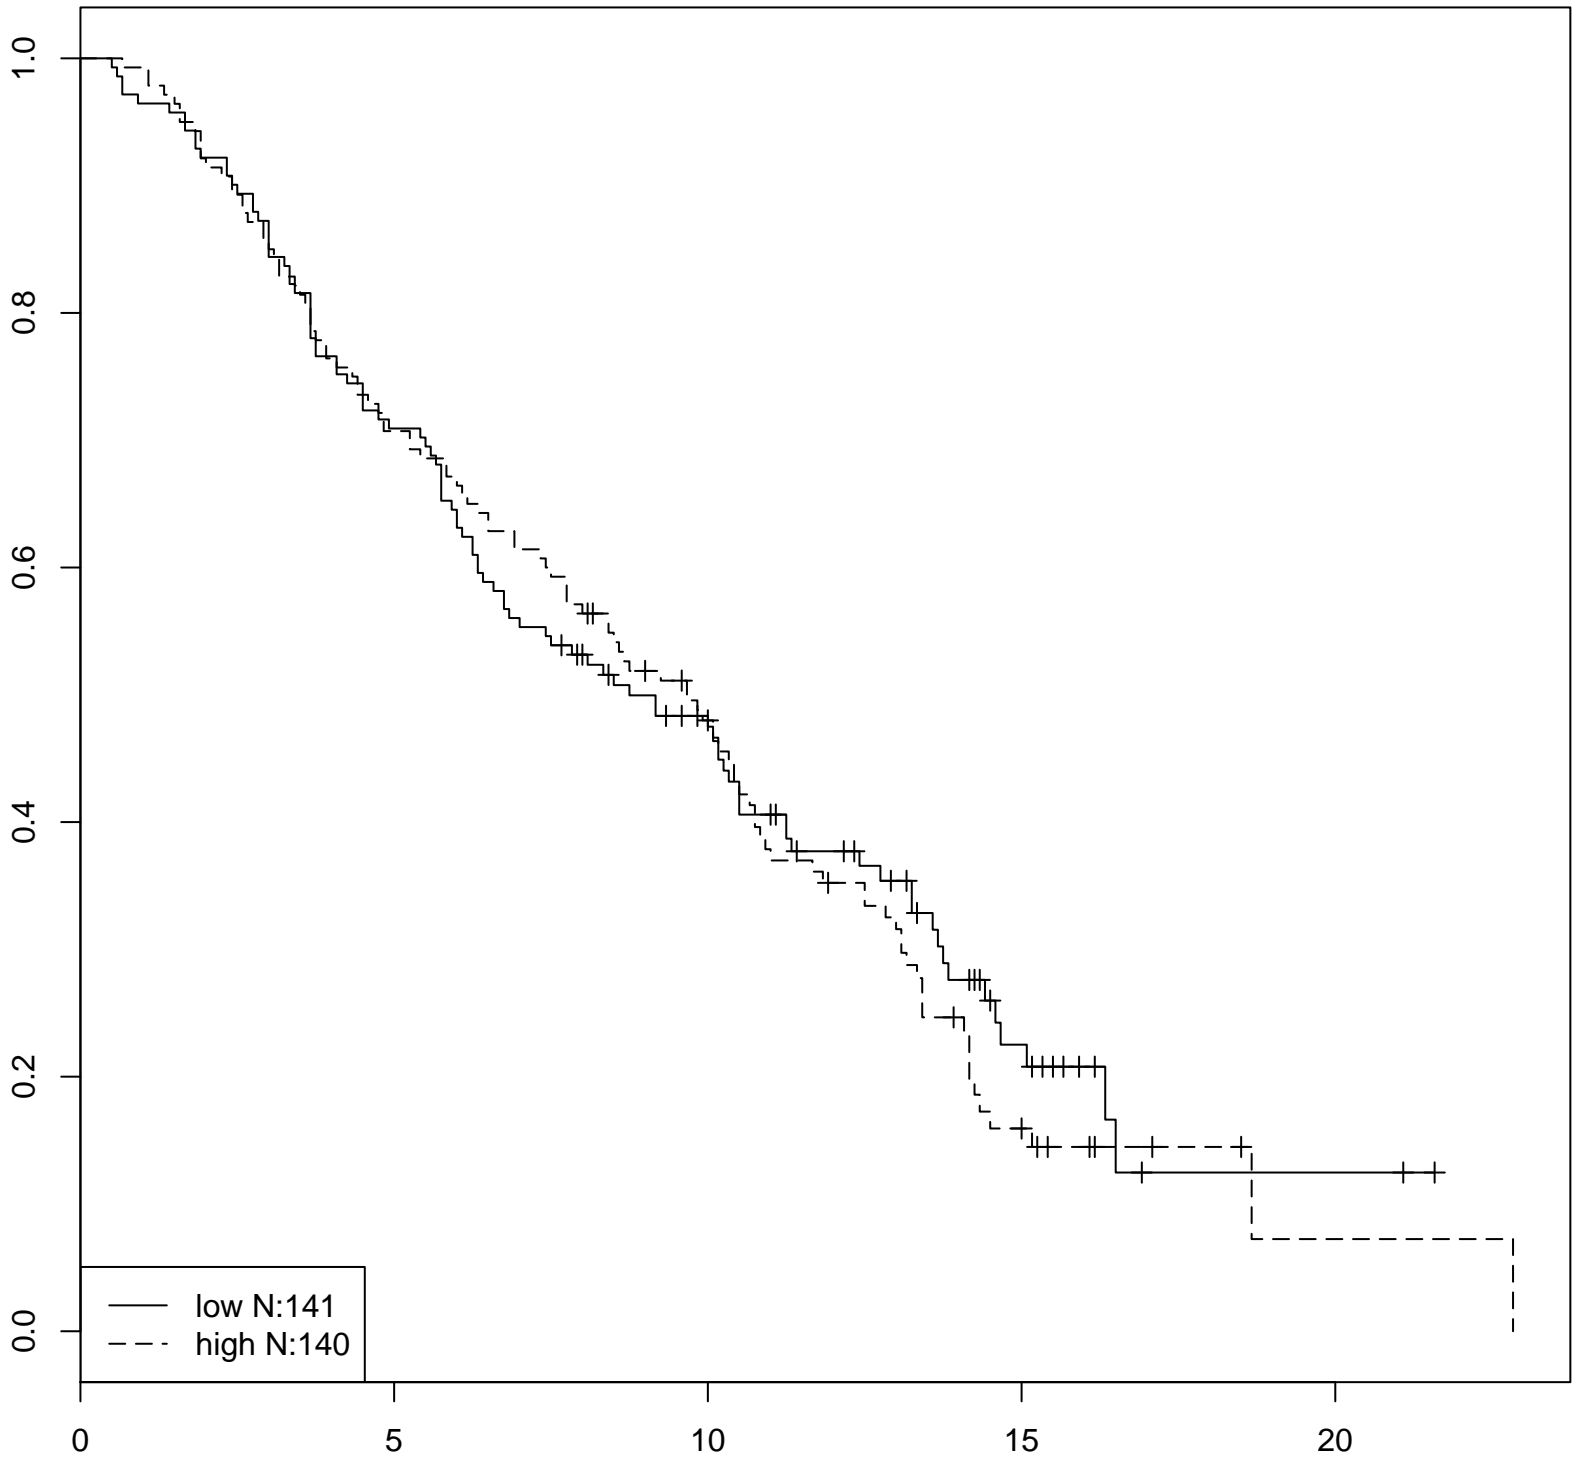

years

log-rank test p-value = 0.641

# Survival by PSAP expression

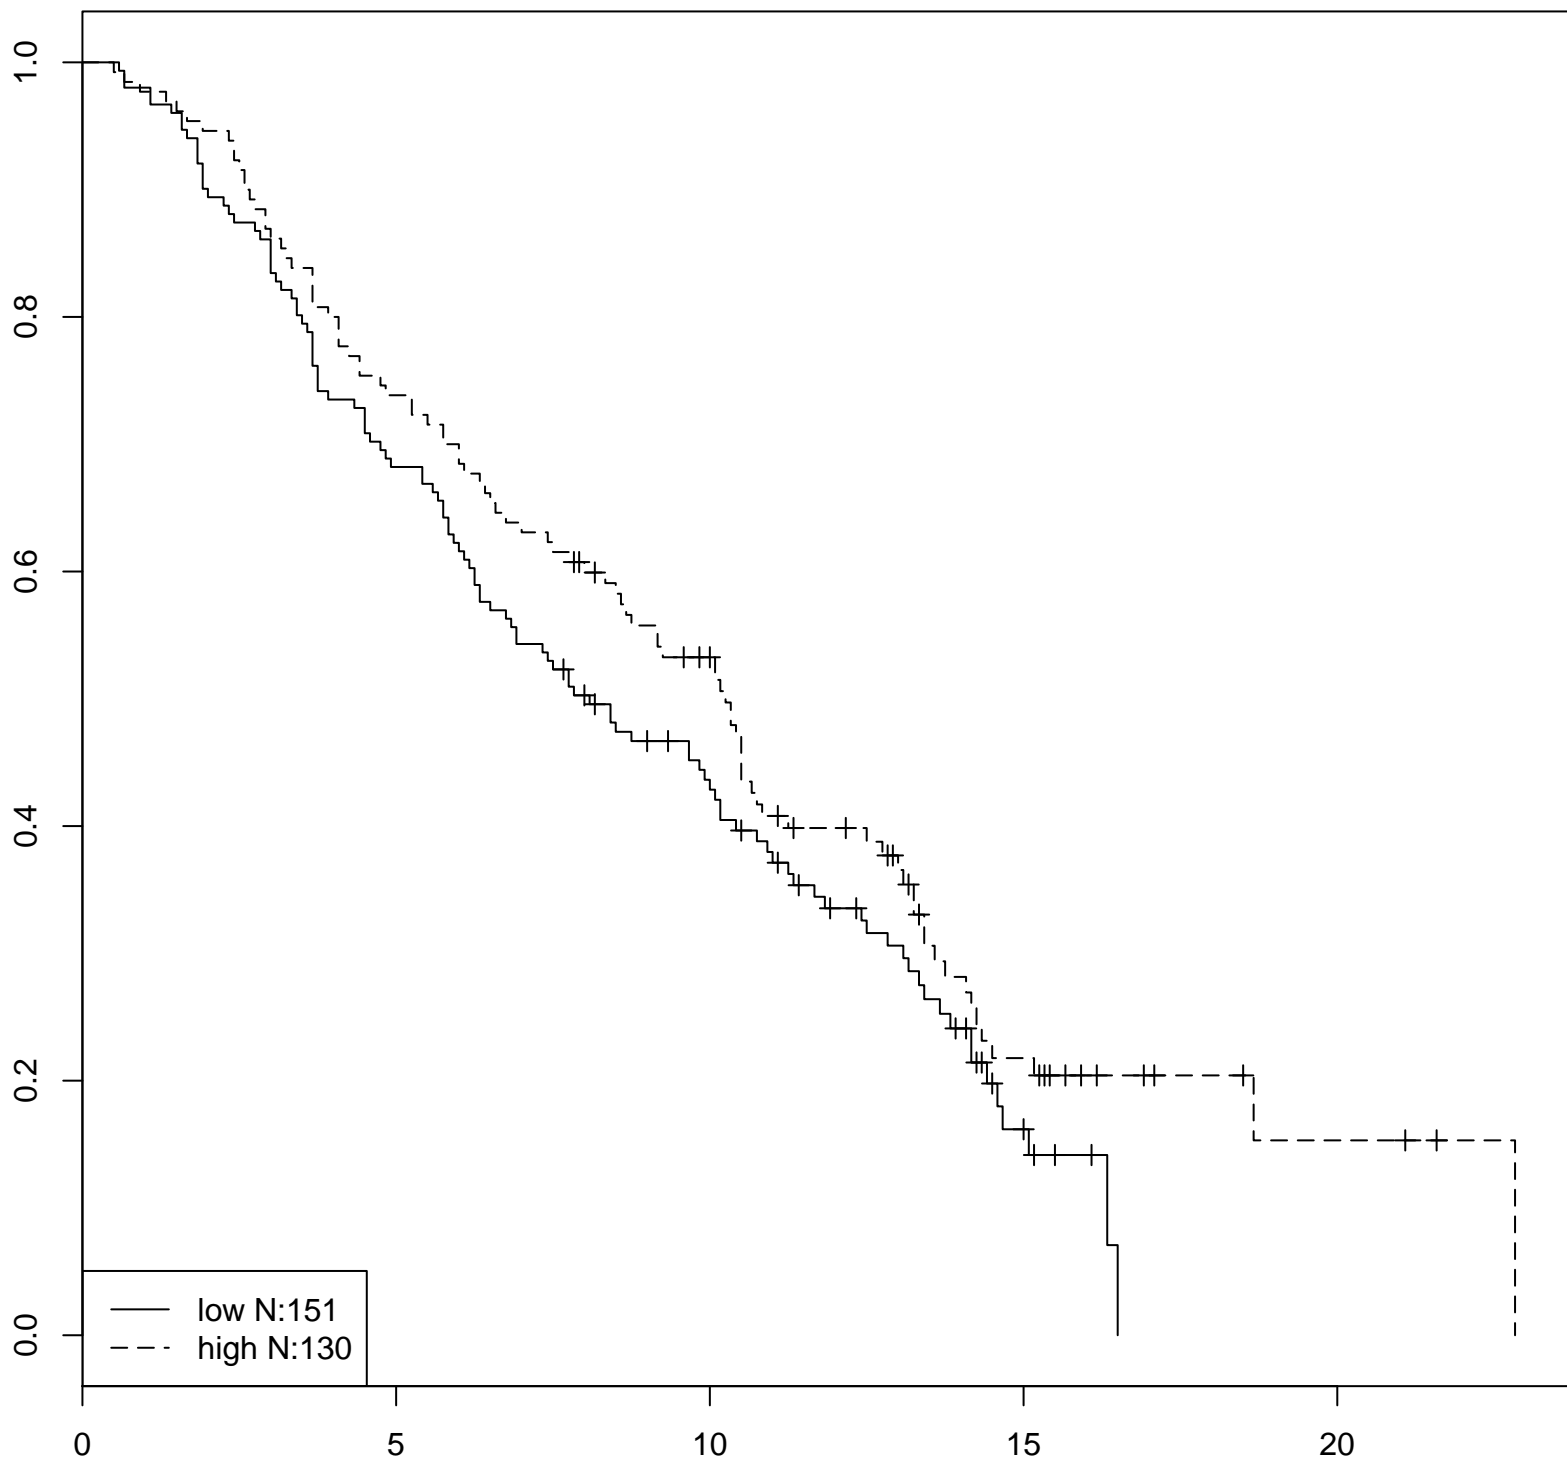

years  
log-rank test p-value = 0.117

# Survival by PSCA expression

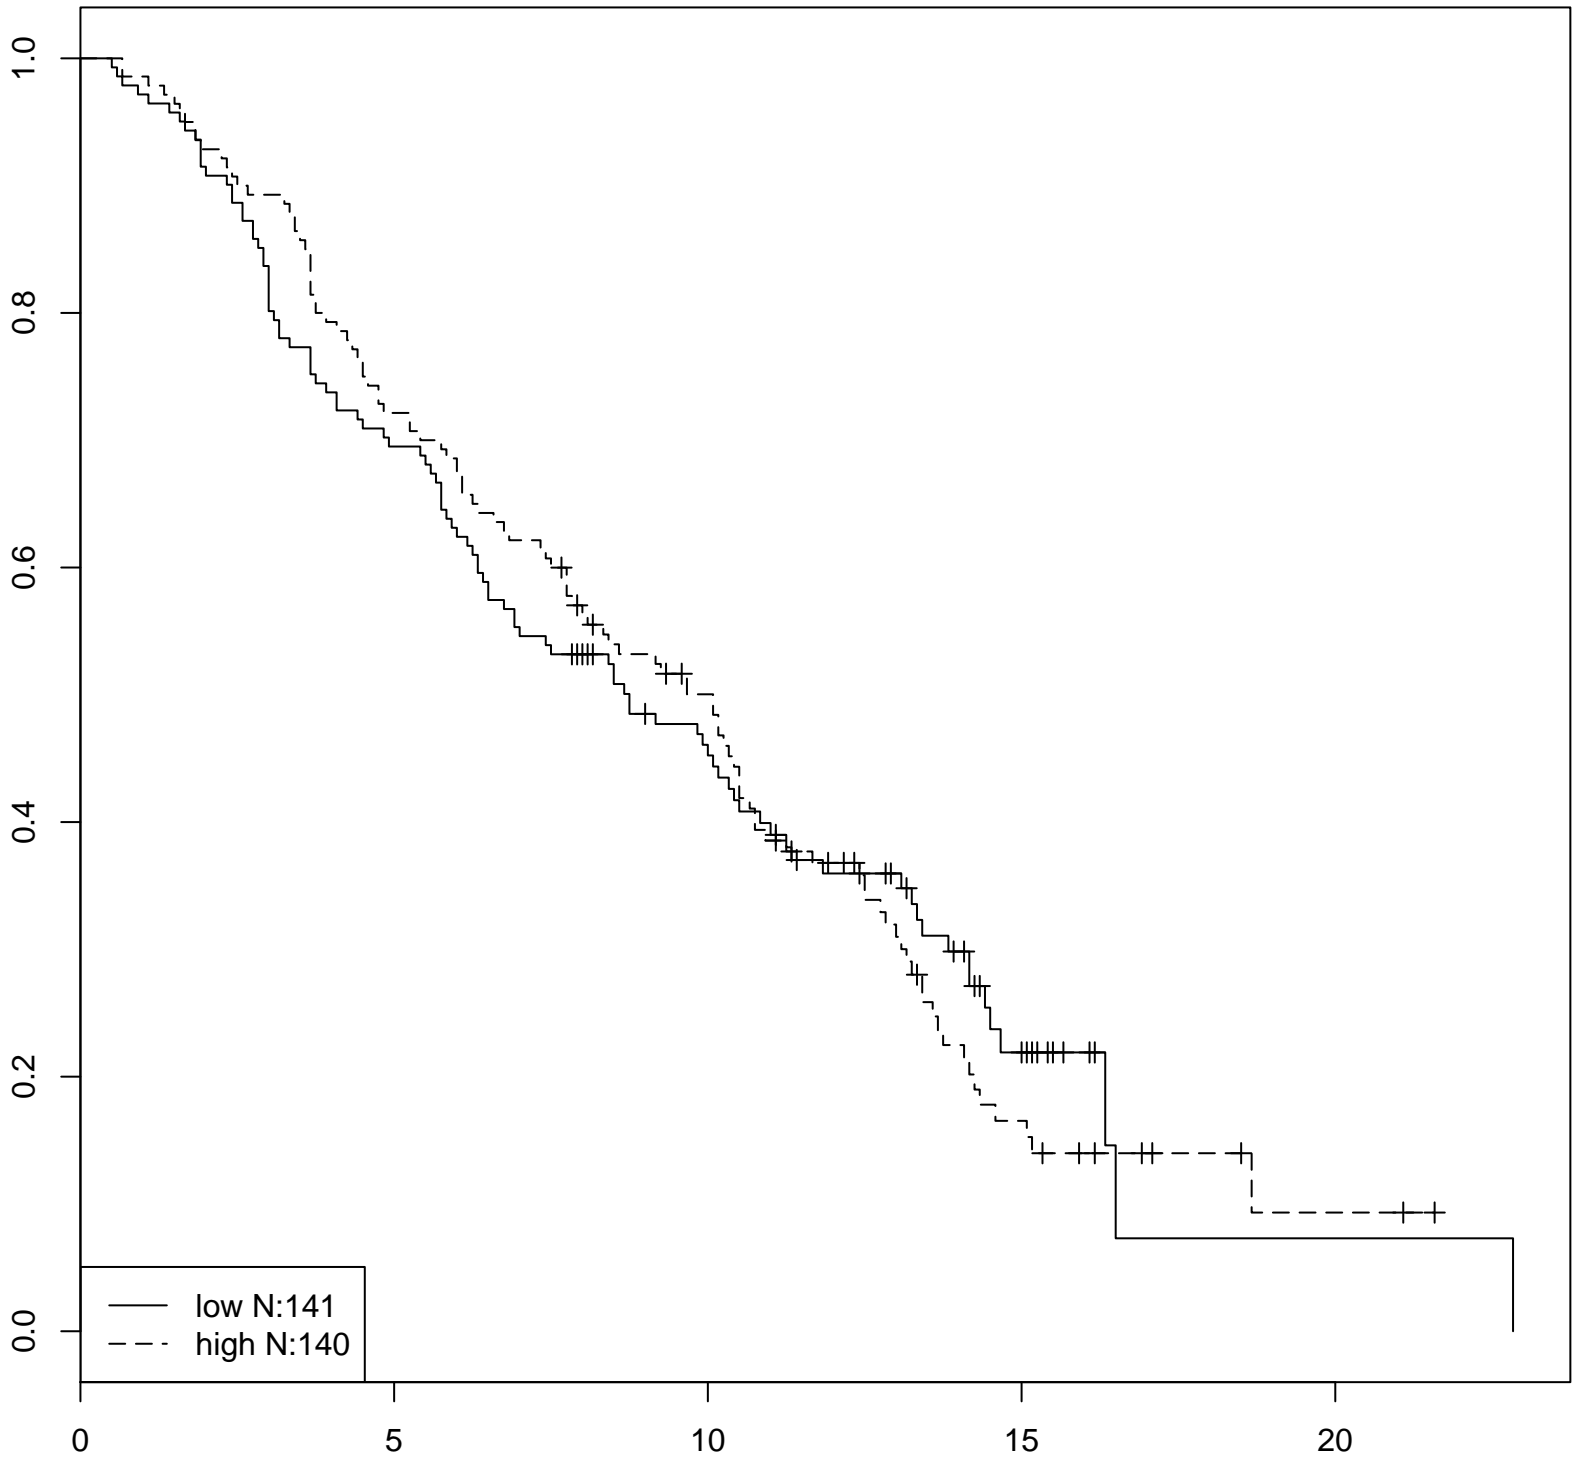

years  
log-rank test p-value = 0.868



# Survival by PSIP1 expression

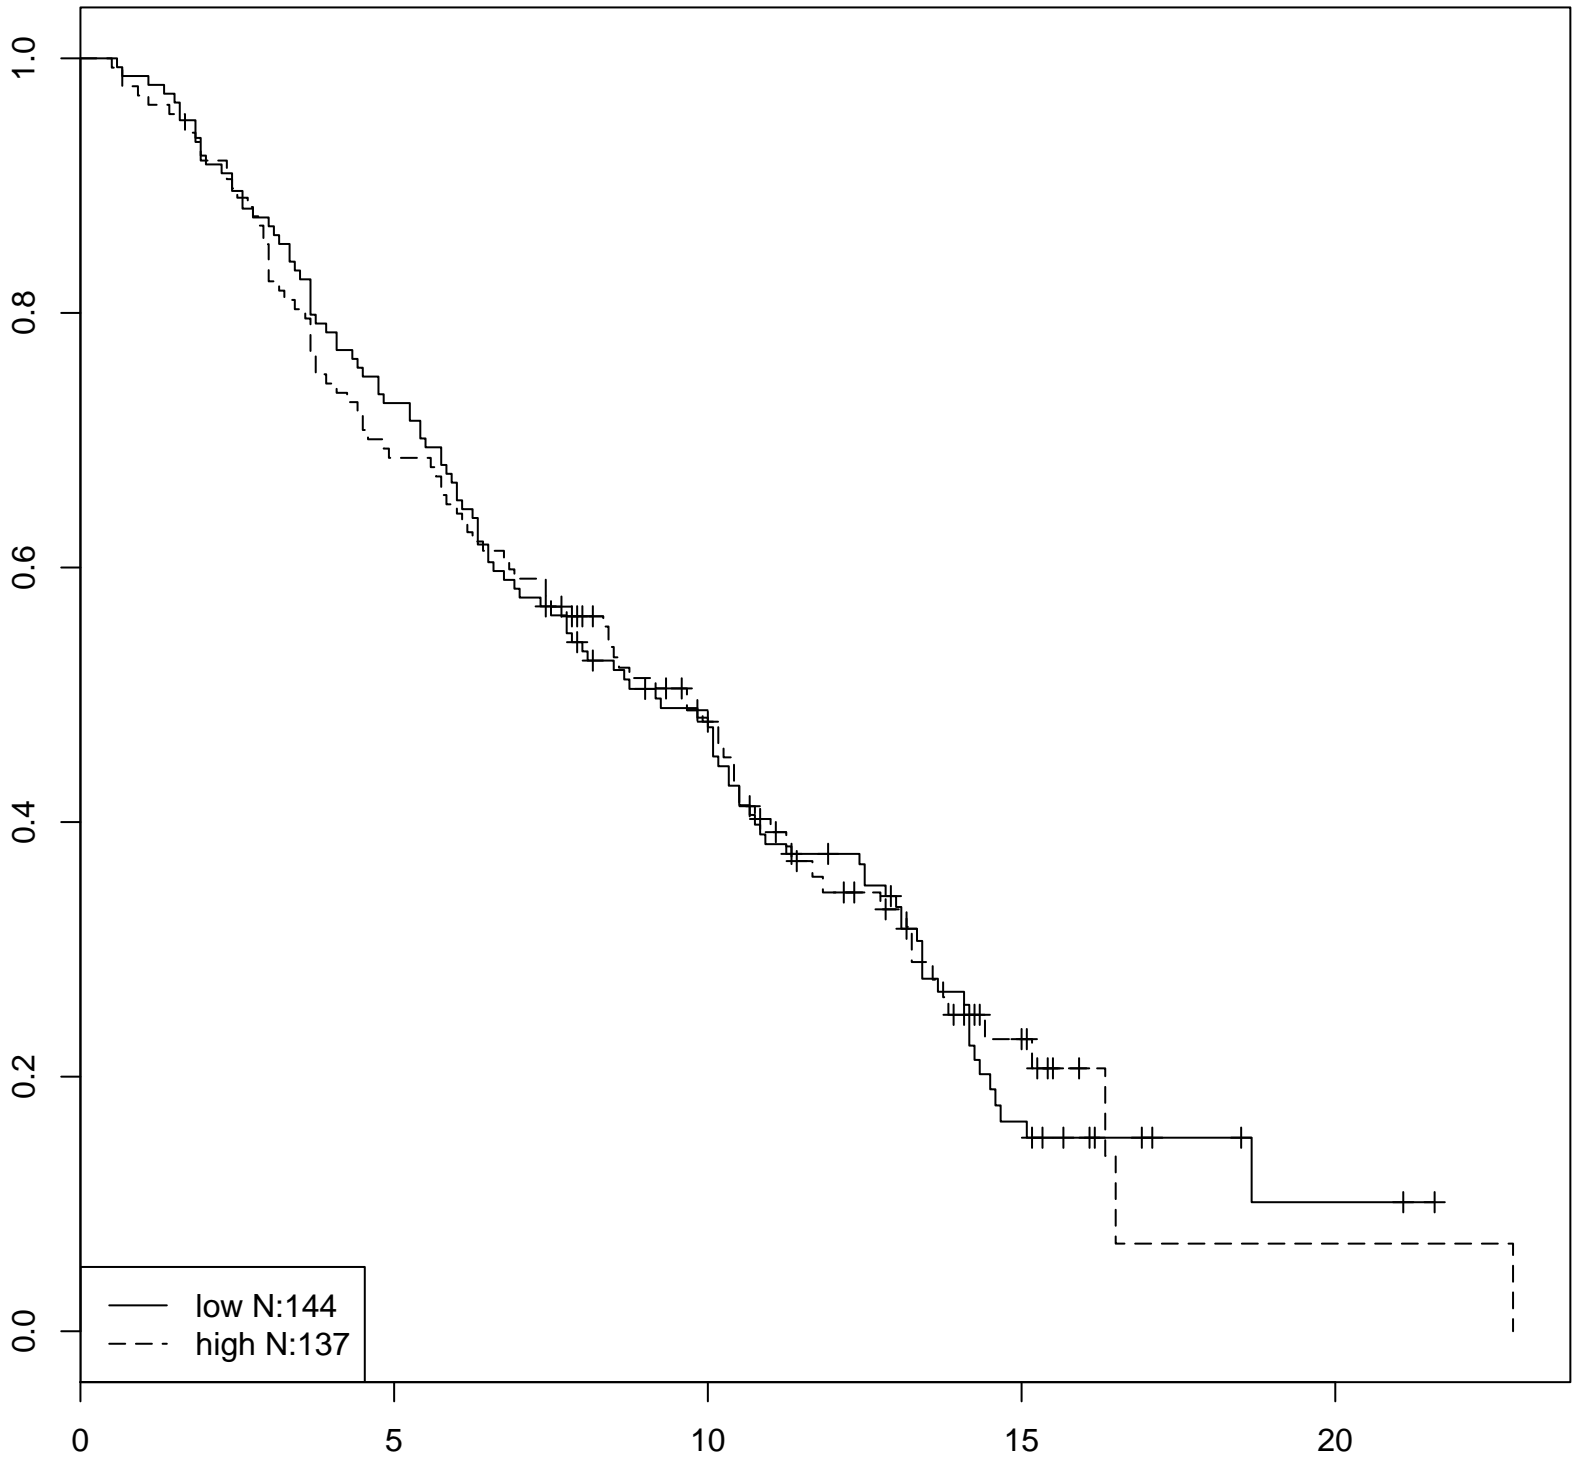

years

log-rank test p-value = 0.906

# Survival by PSMA7 expression

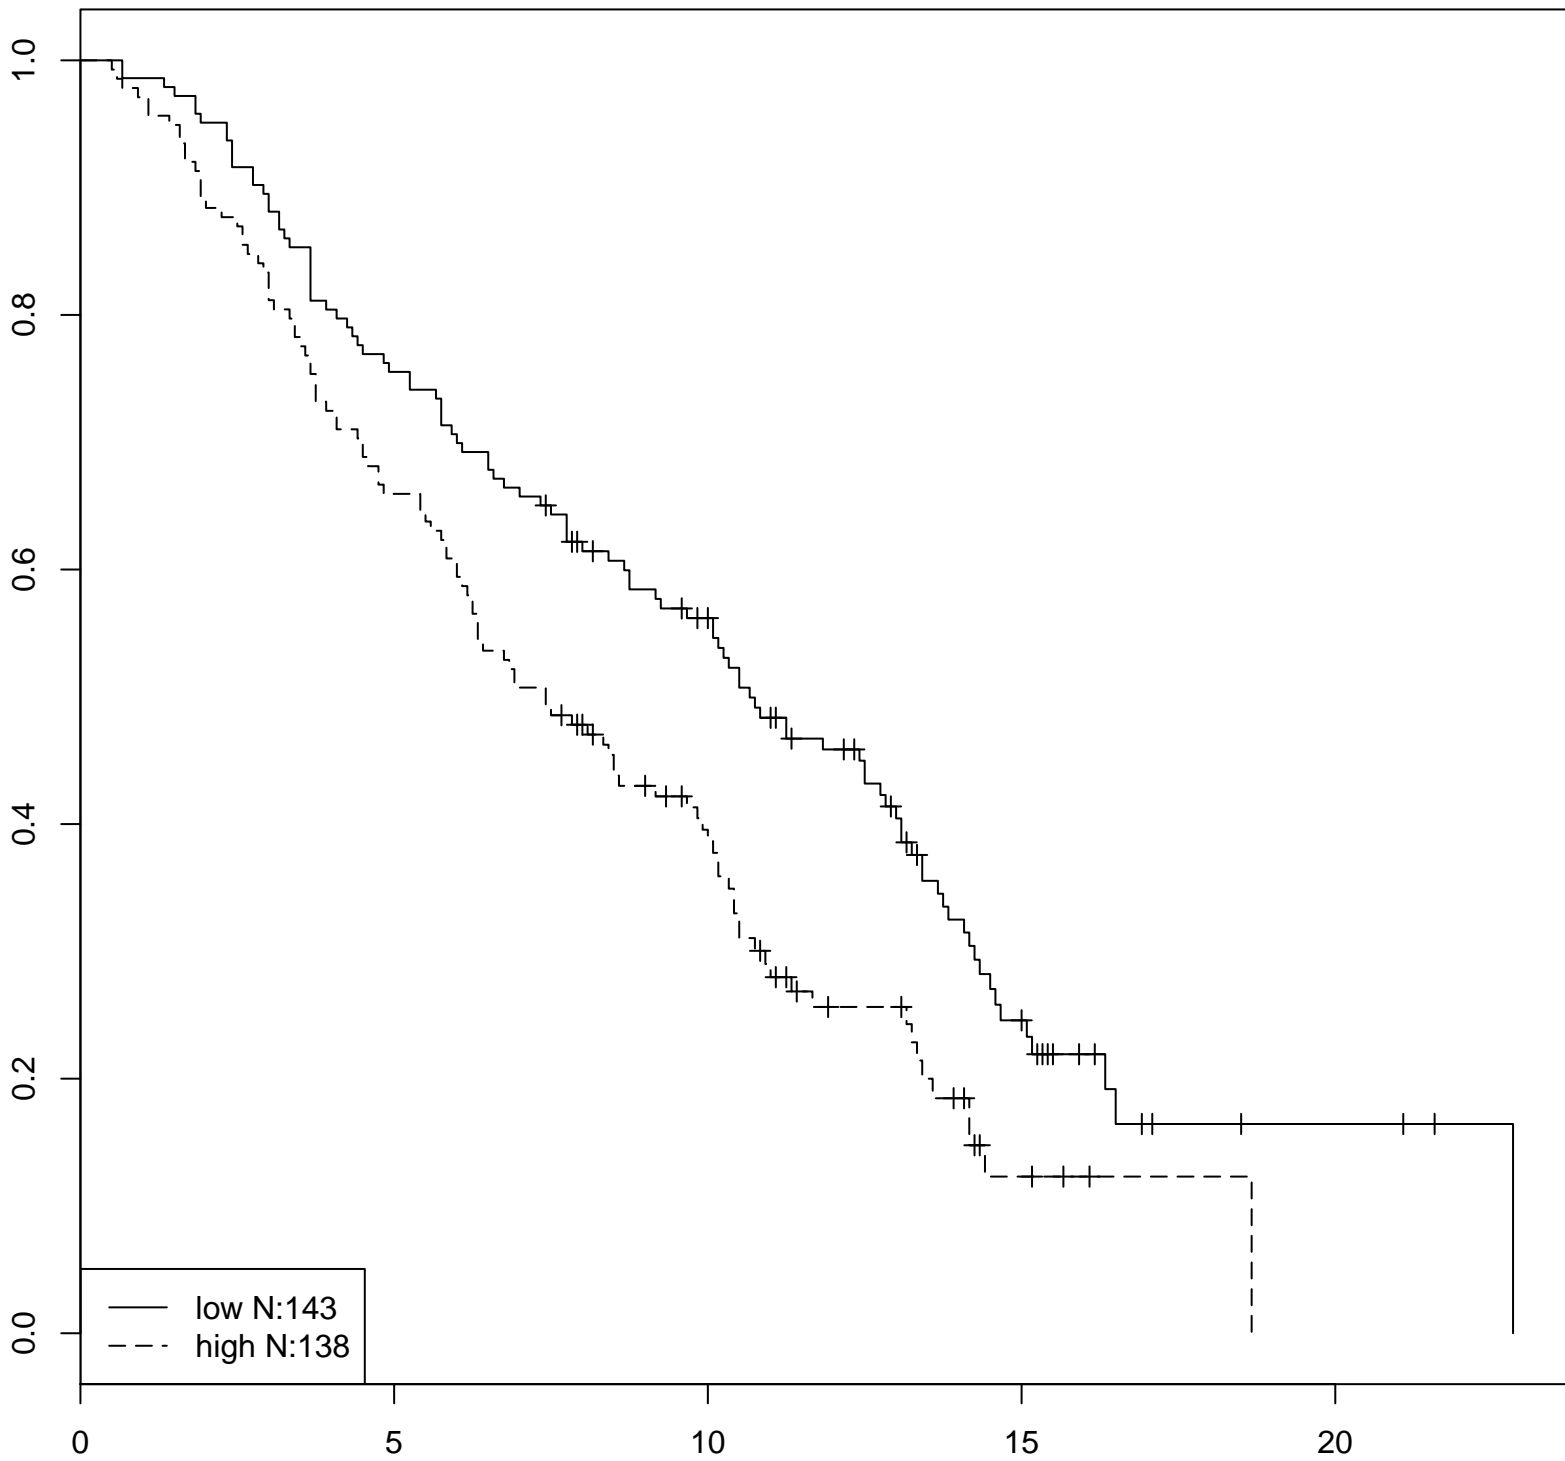

years

log-rank test p-value = 0.002

# Survival by PSMC4 expression

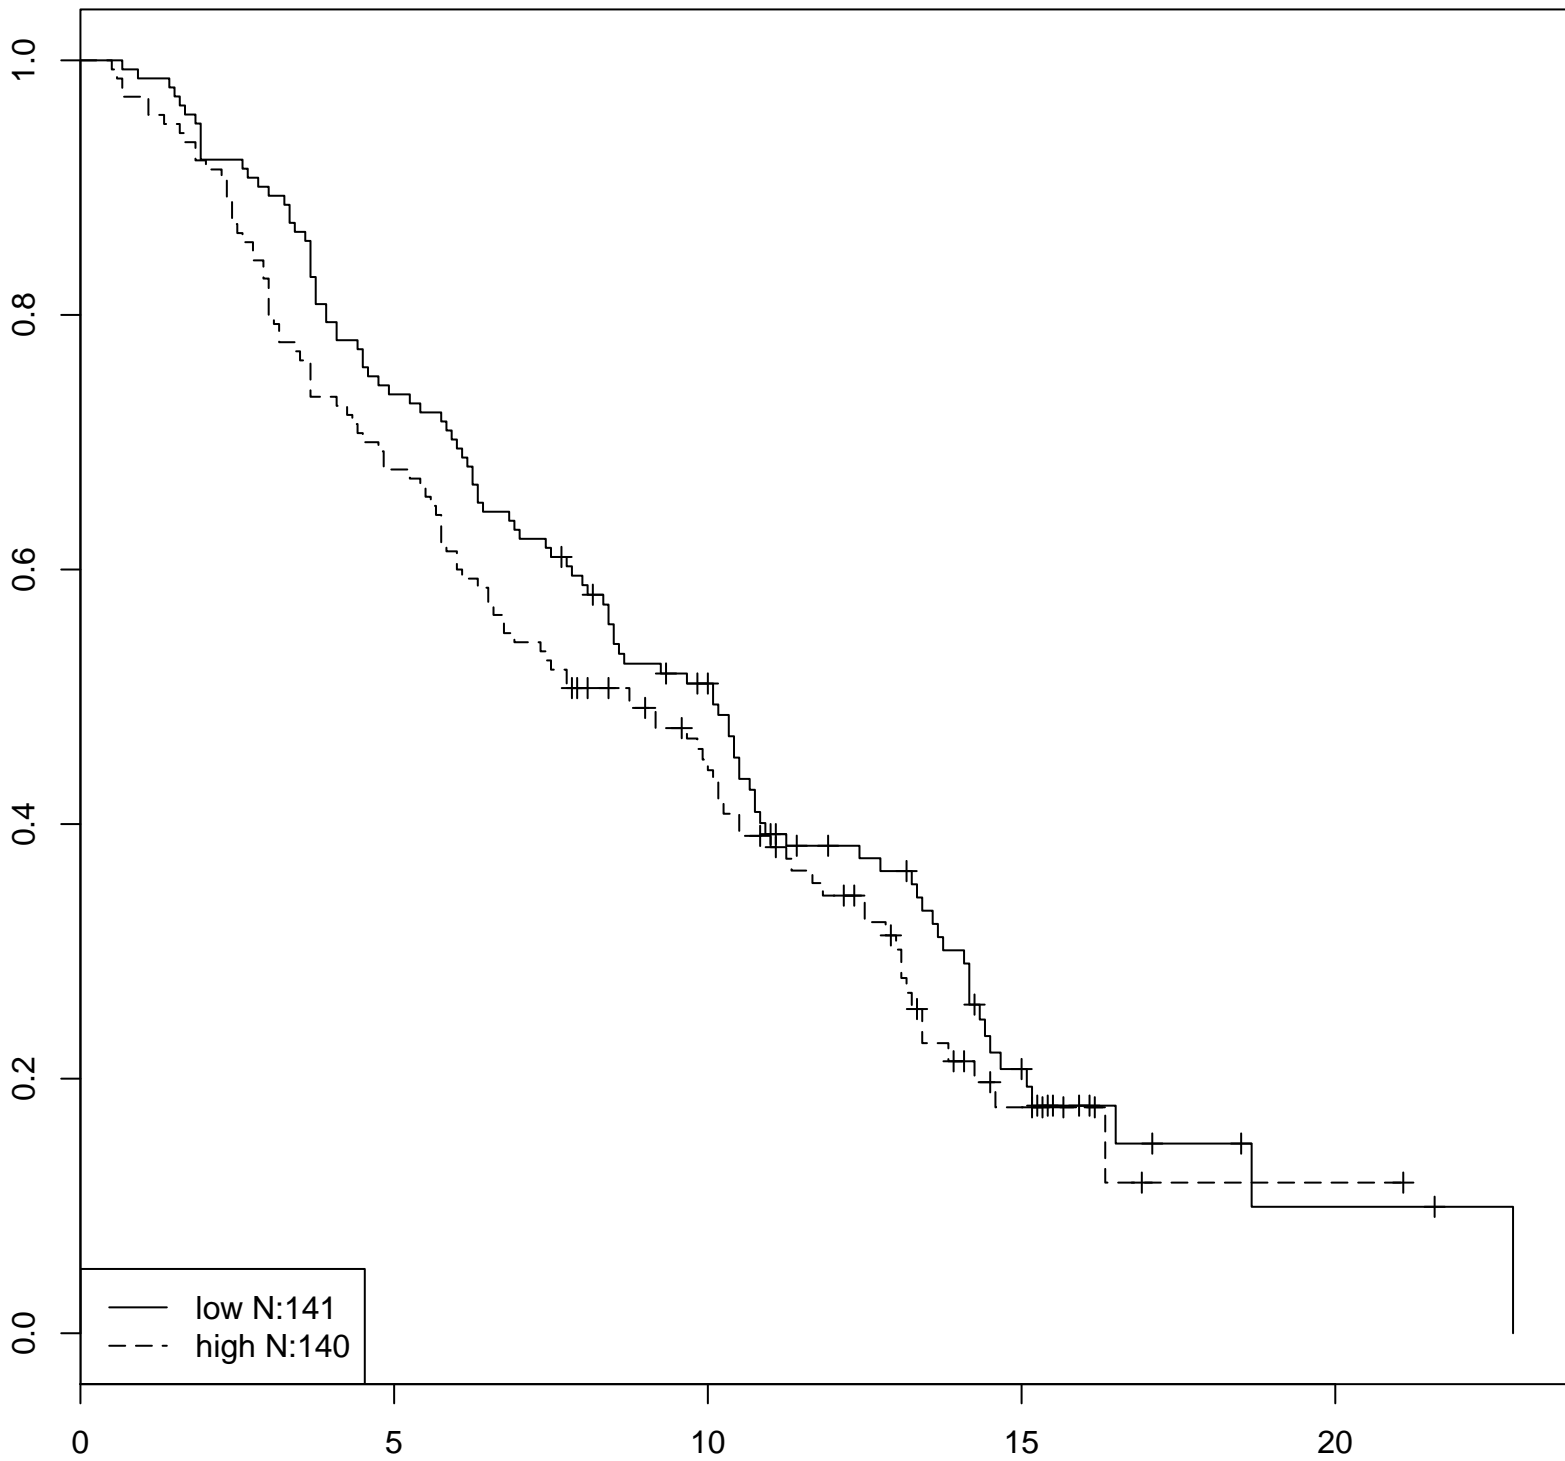

years

log-rank test p-value = 0.249

# Survival by PSMD9 expression

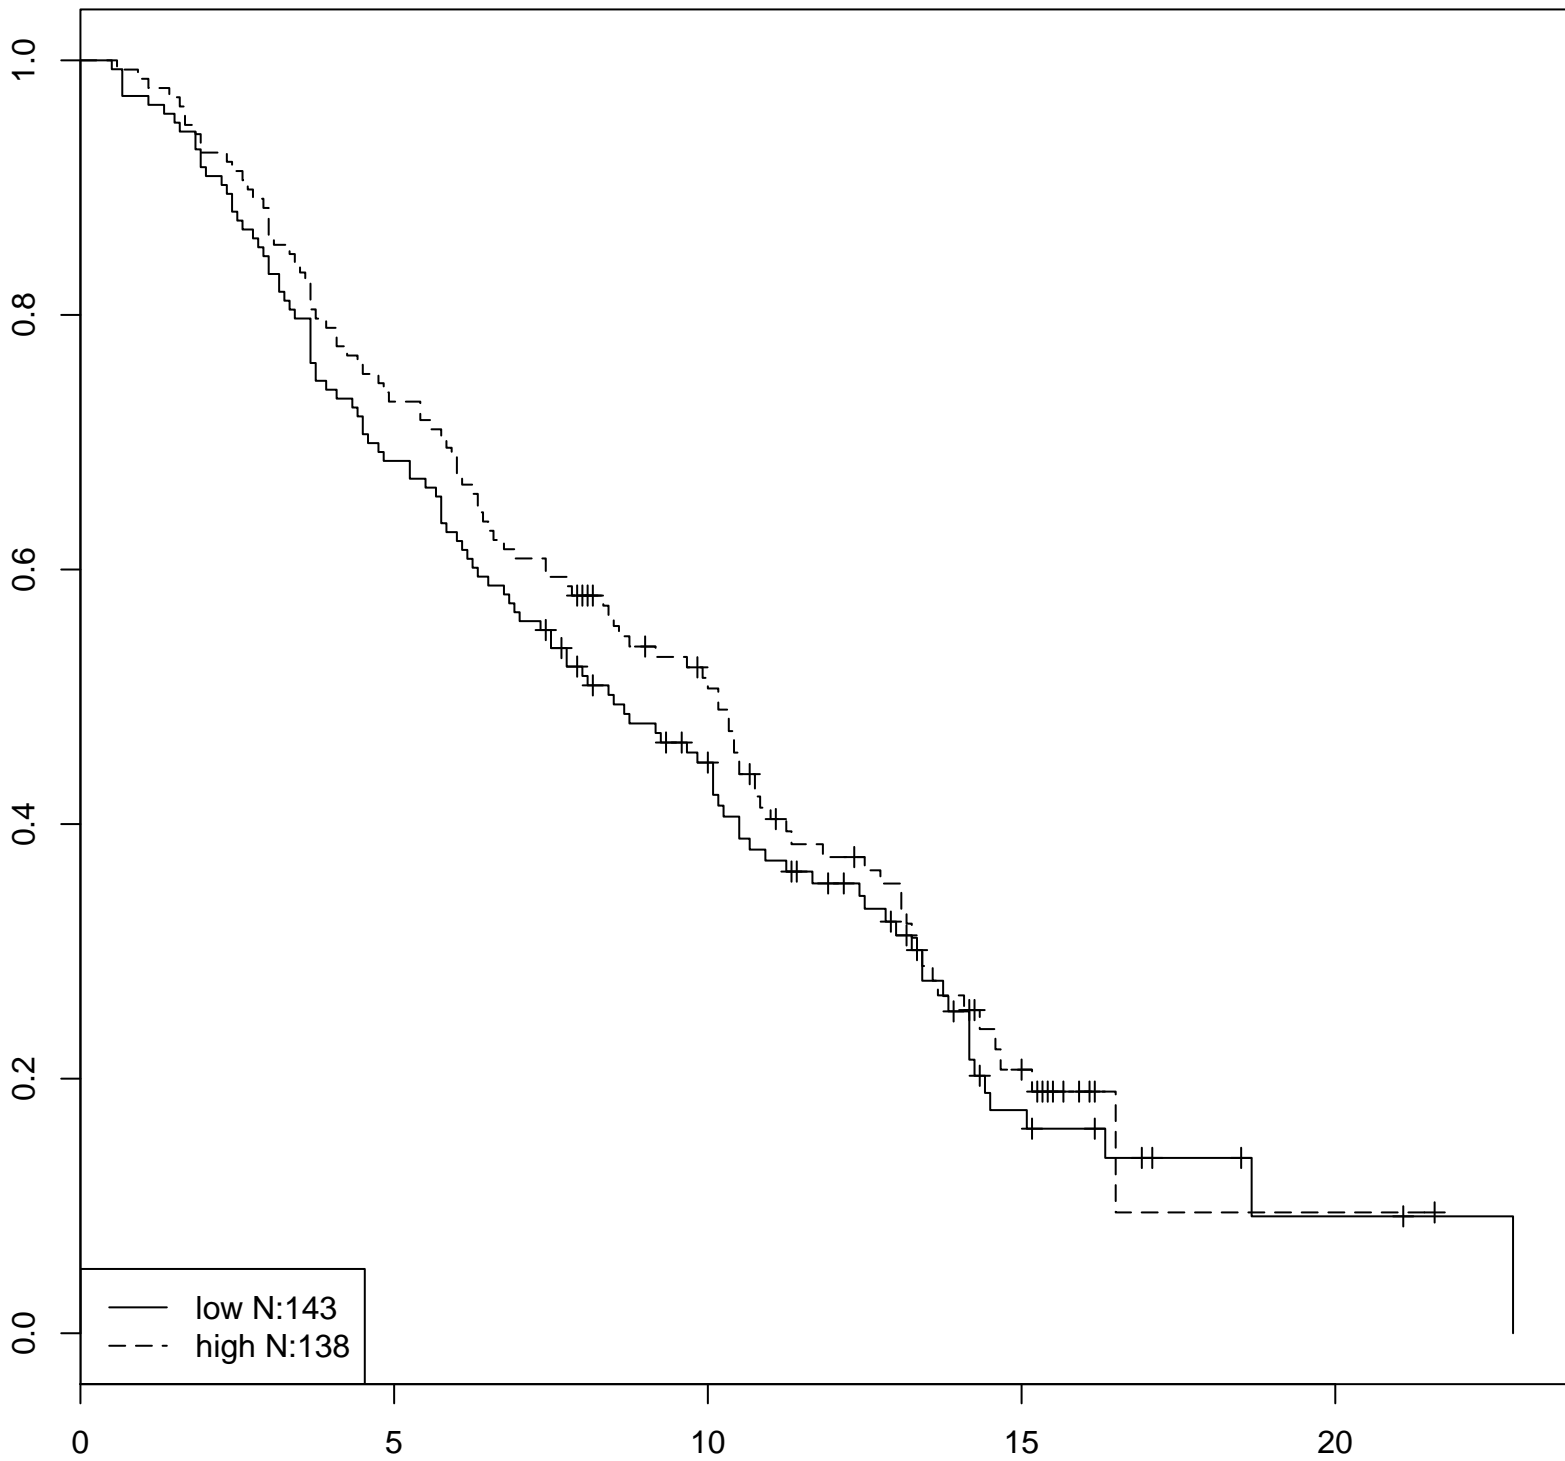

# Survival by PTCH1 expression

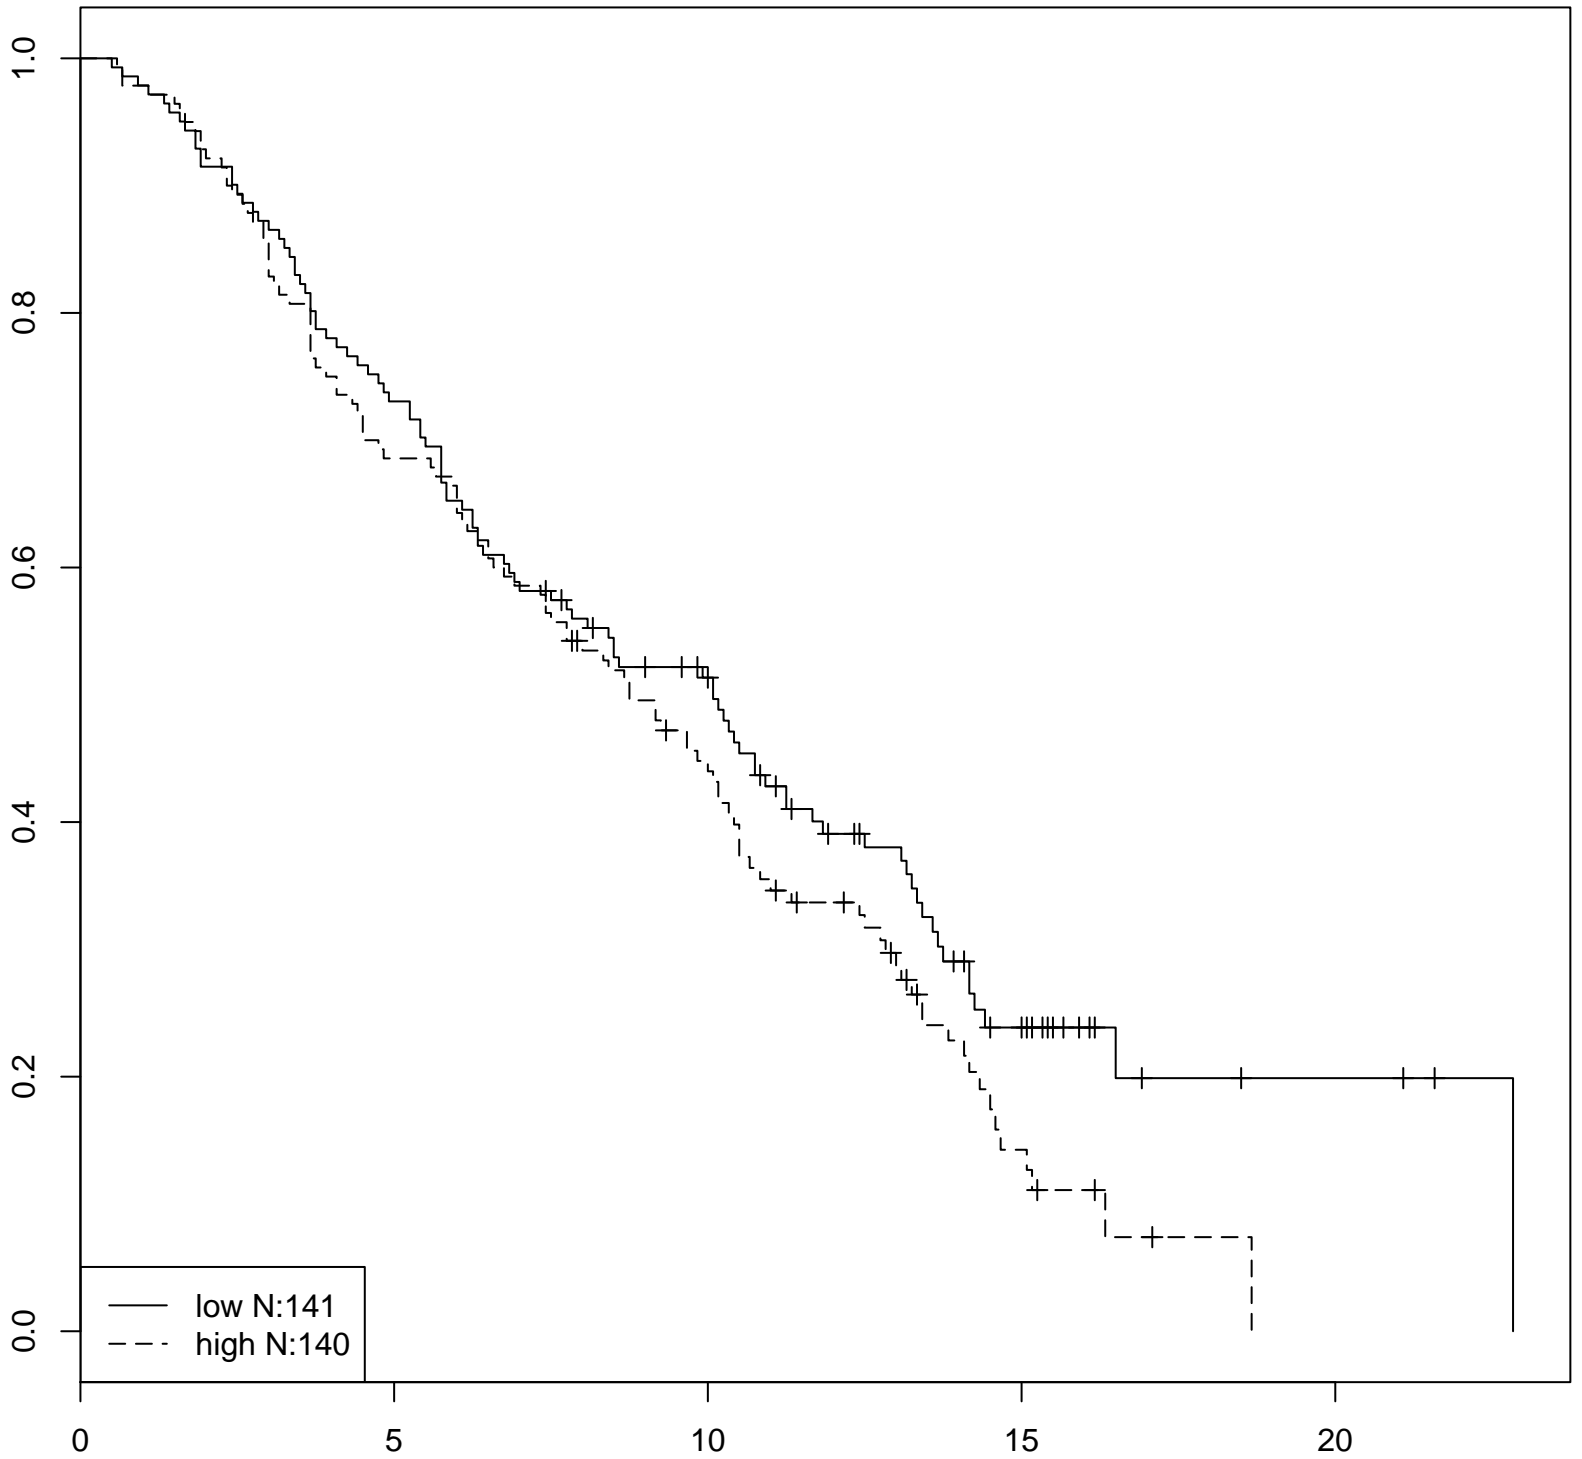

years  
log-rank test p-value = 0.1

# Survival by PTEN expression

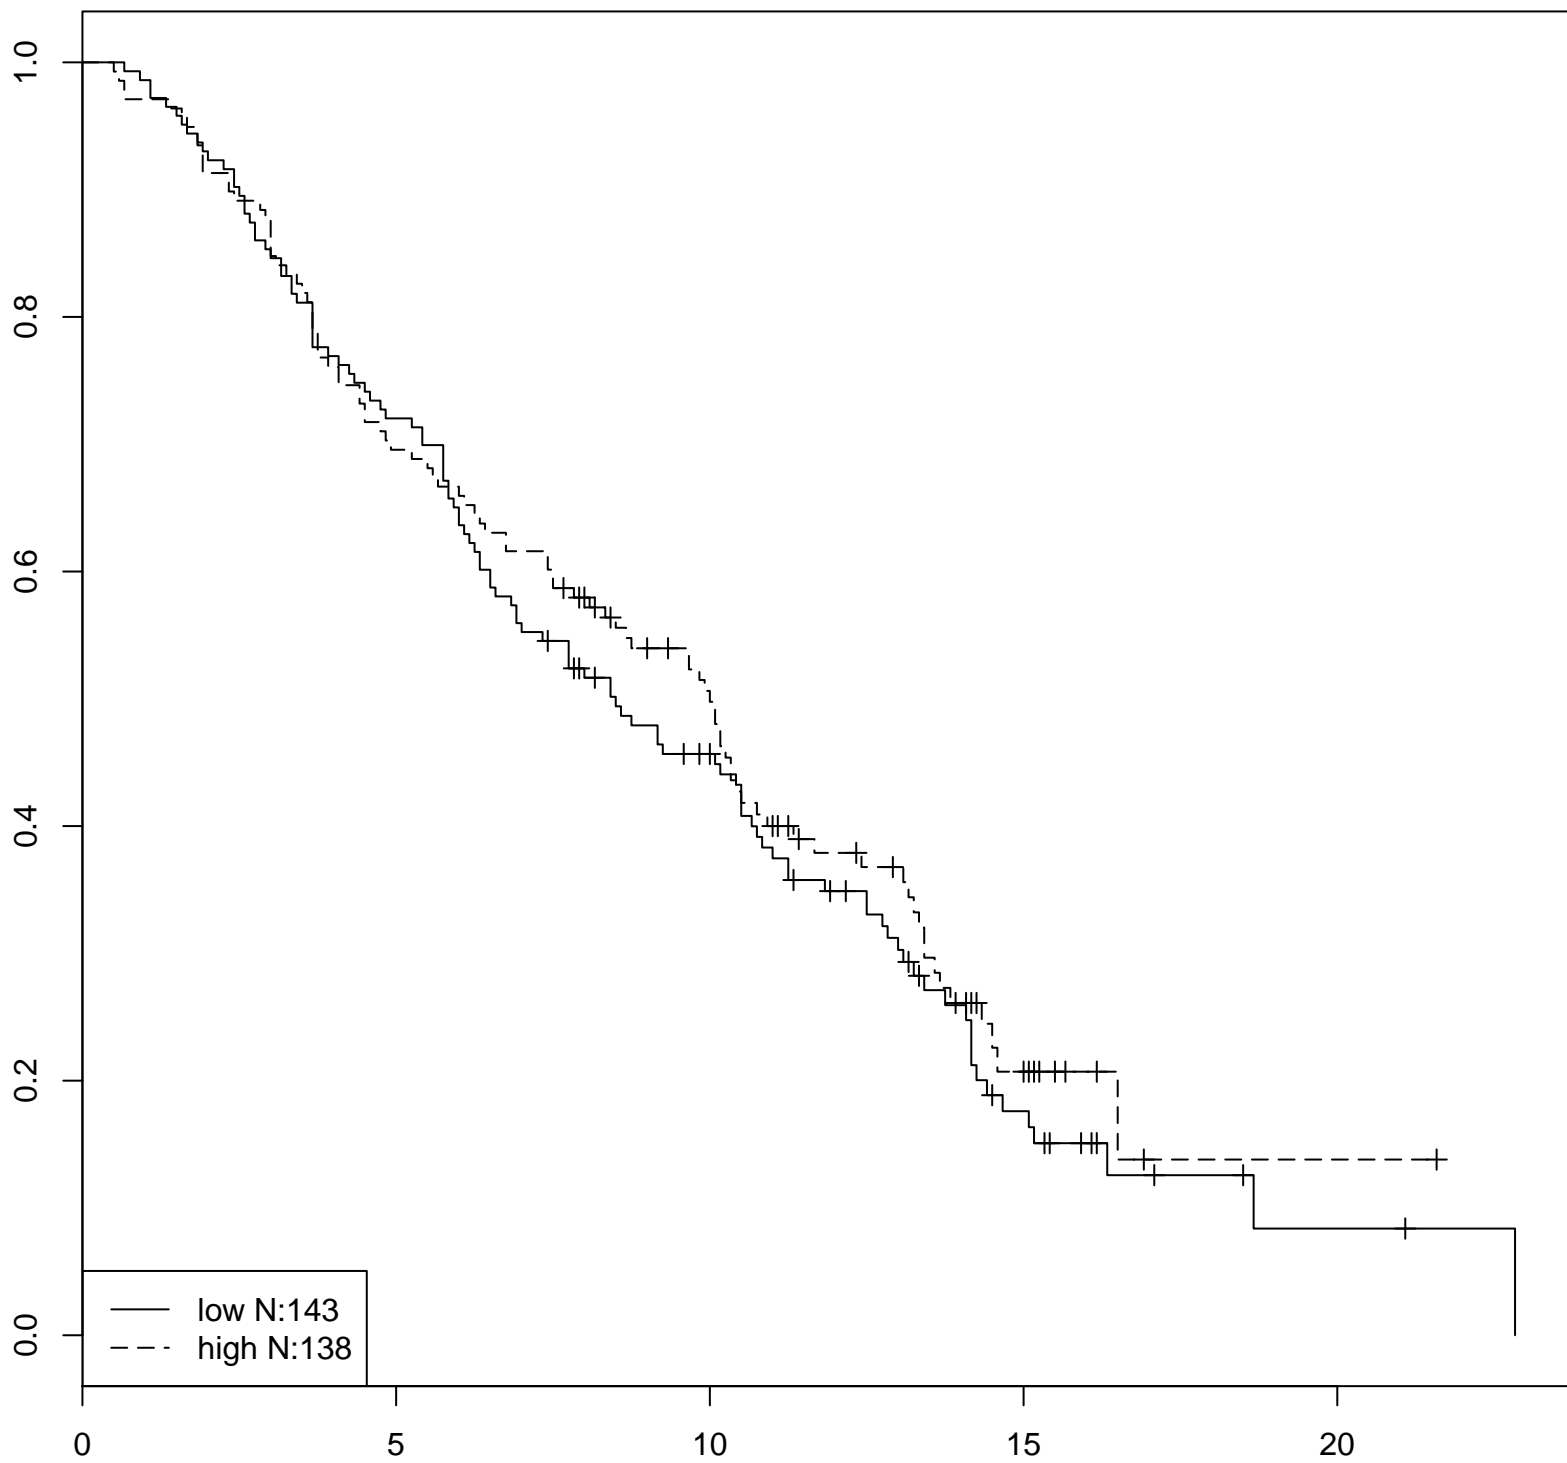

years

log-rank test p-value = 0.439

# Survival by PTGS2 expression

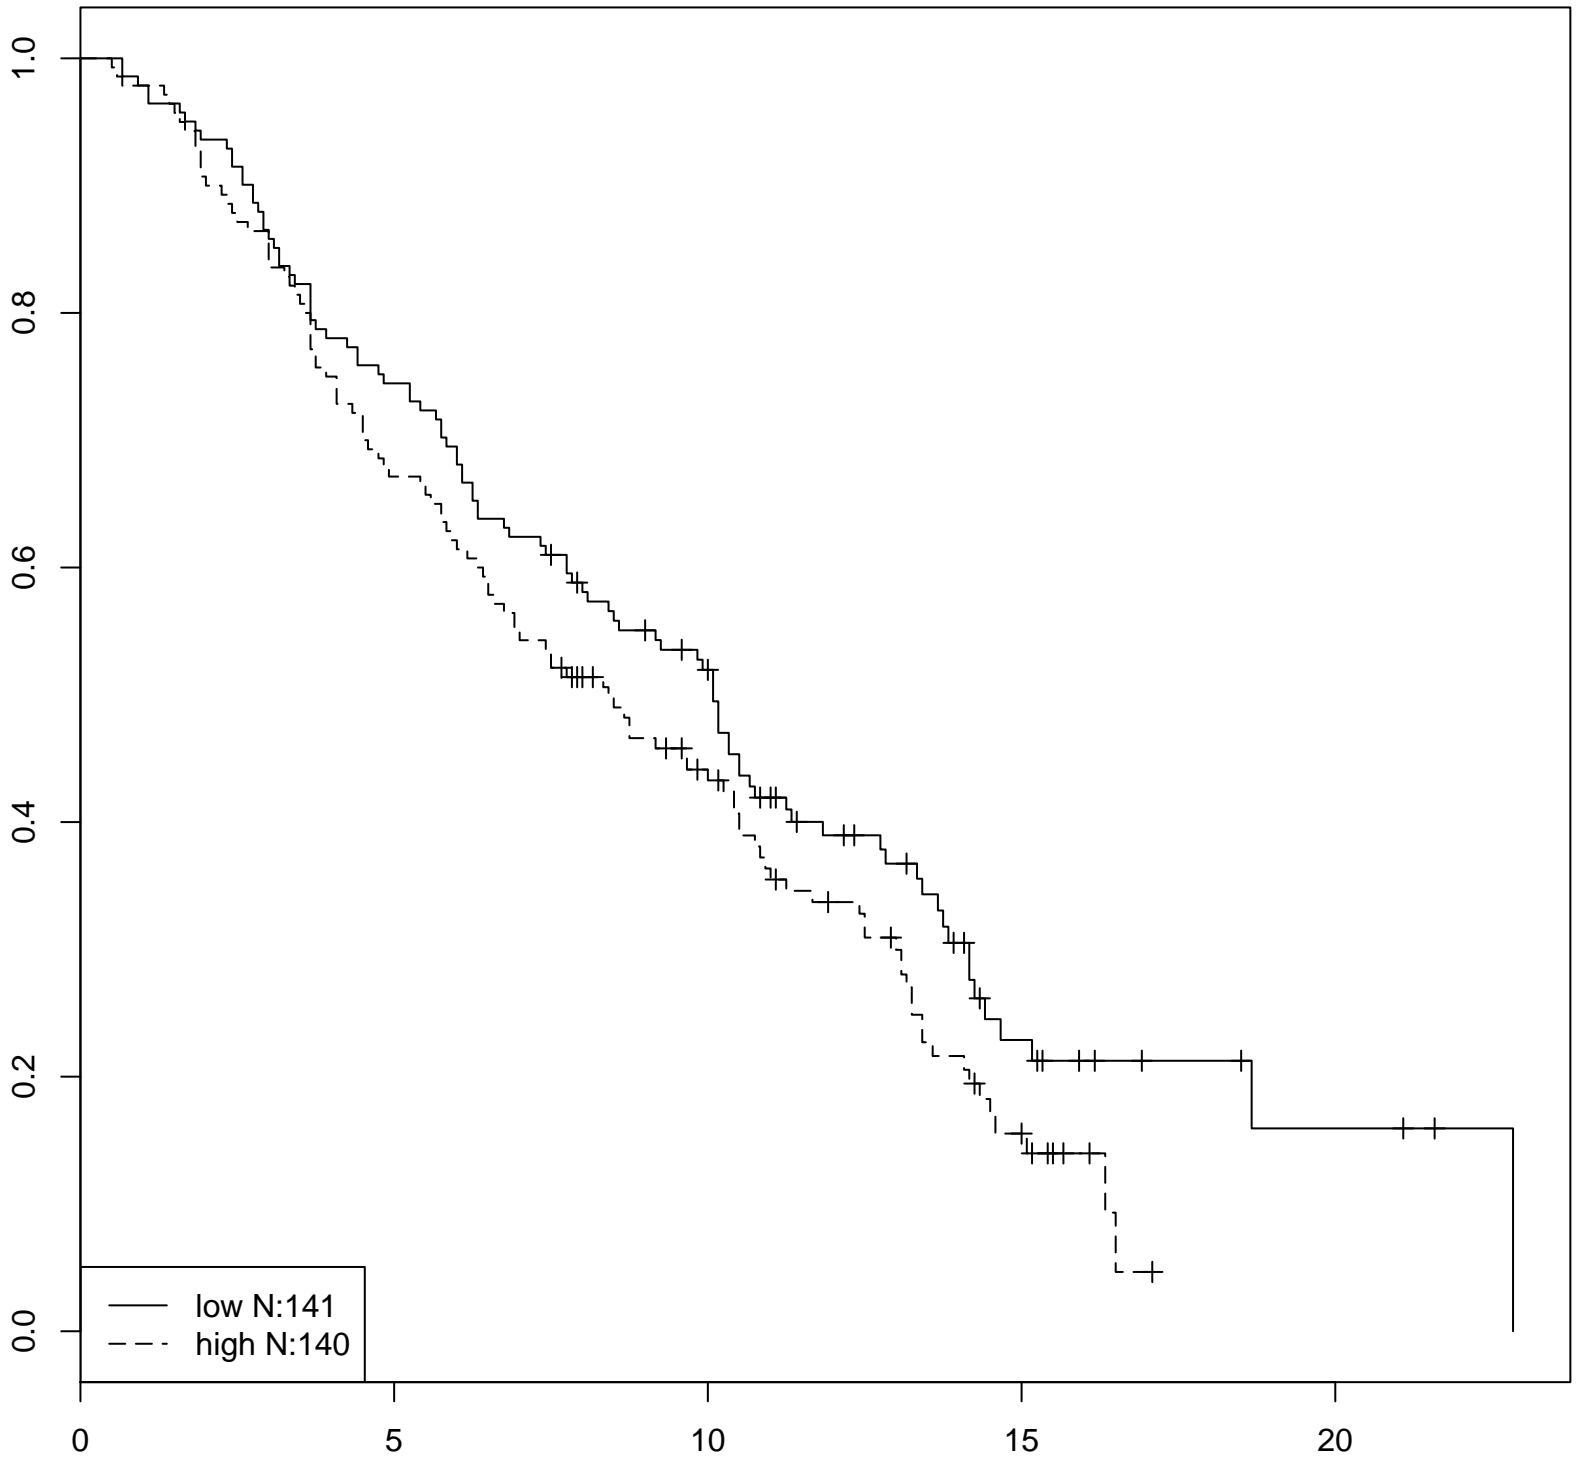

years

log-rank test p-value = 0.082

# Survival by PTOV1 expression

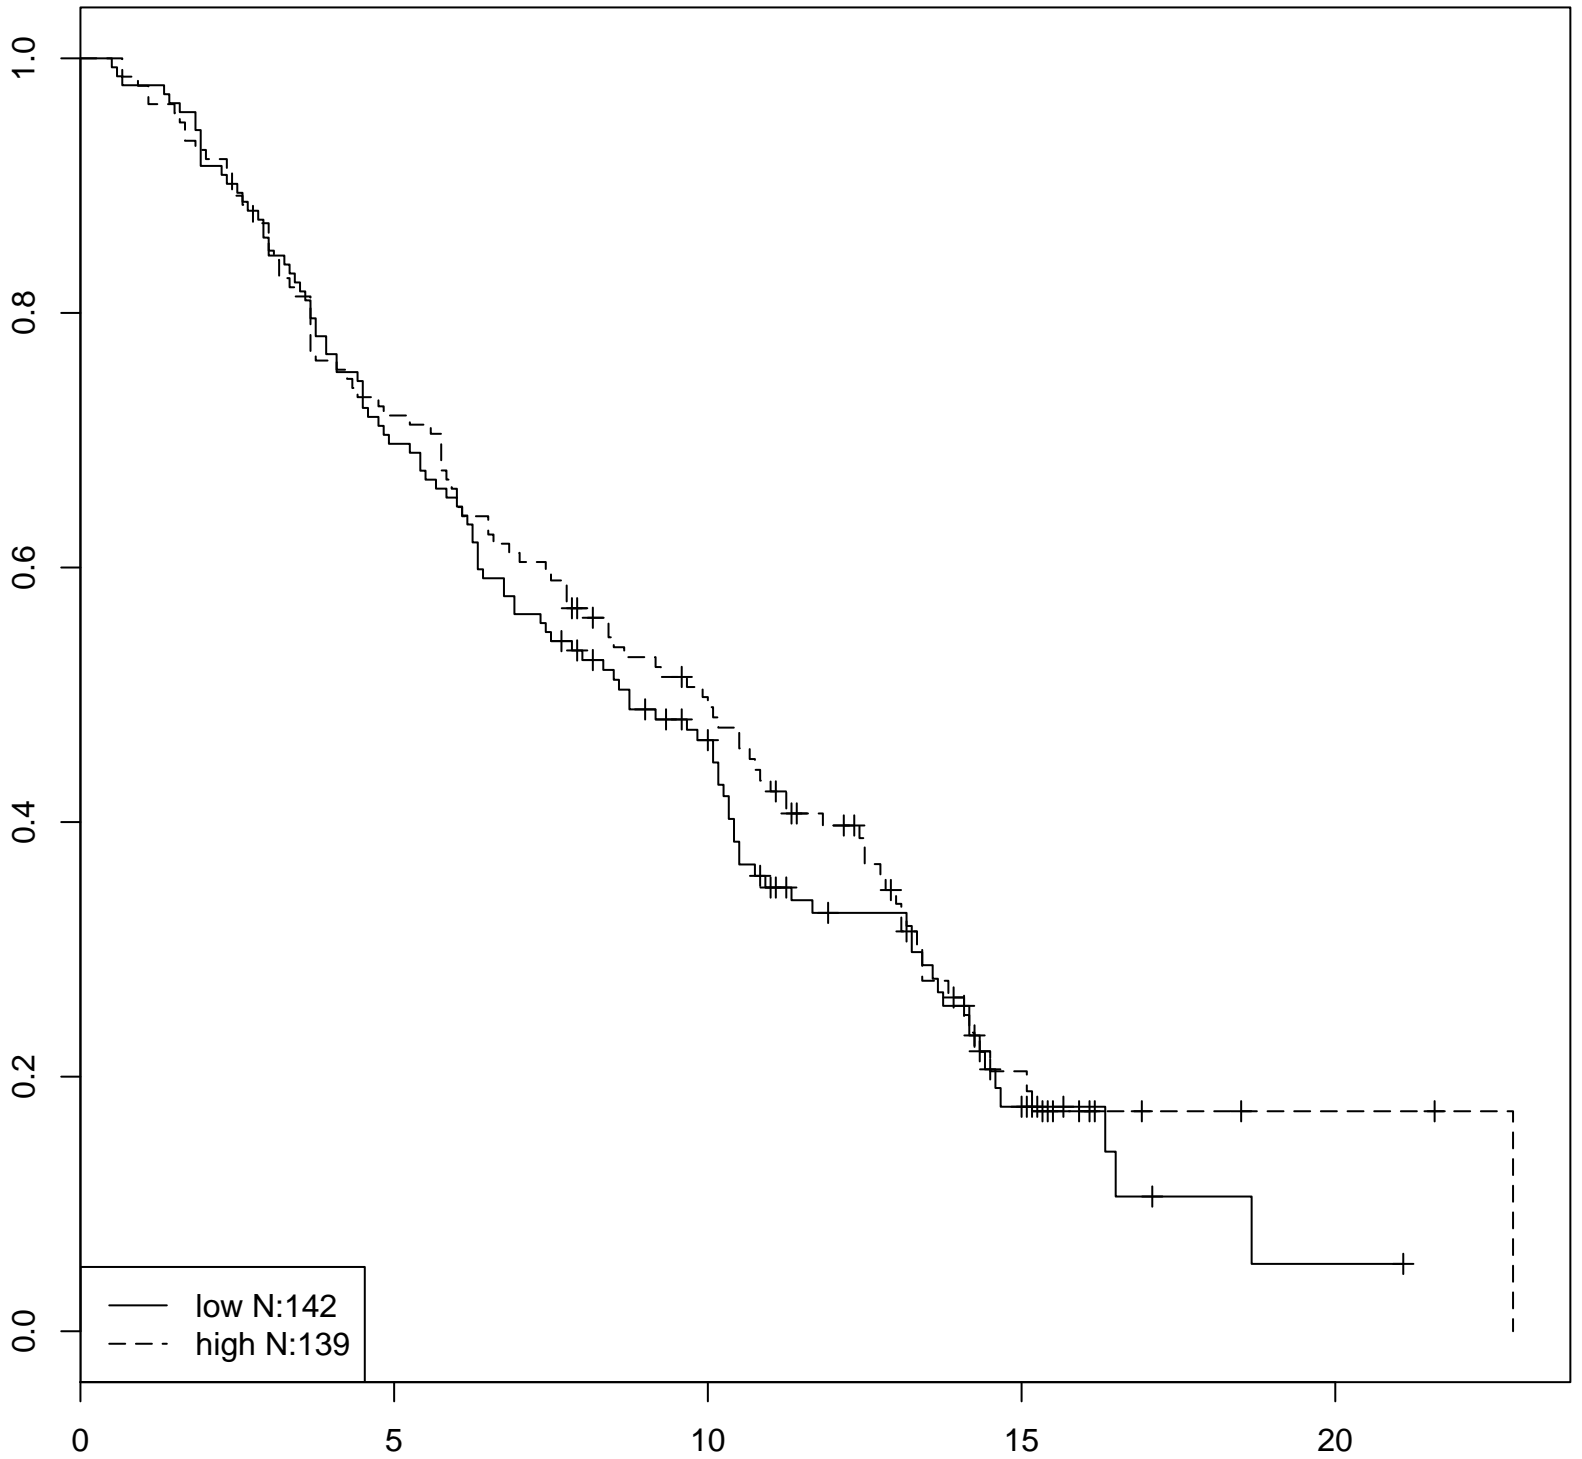



# Survival by PTX3 expression

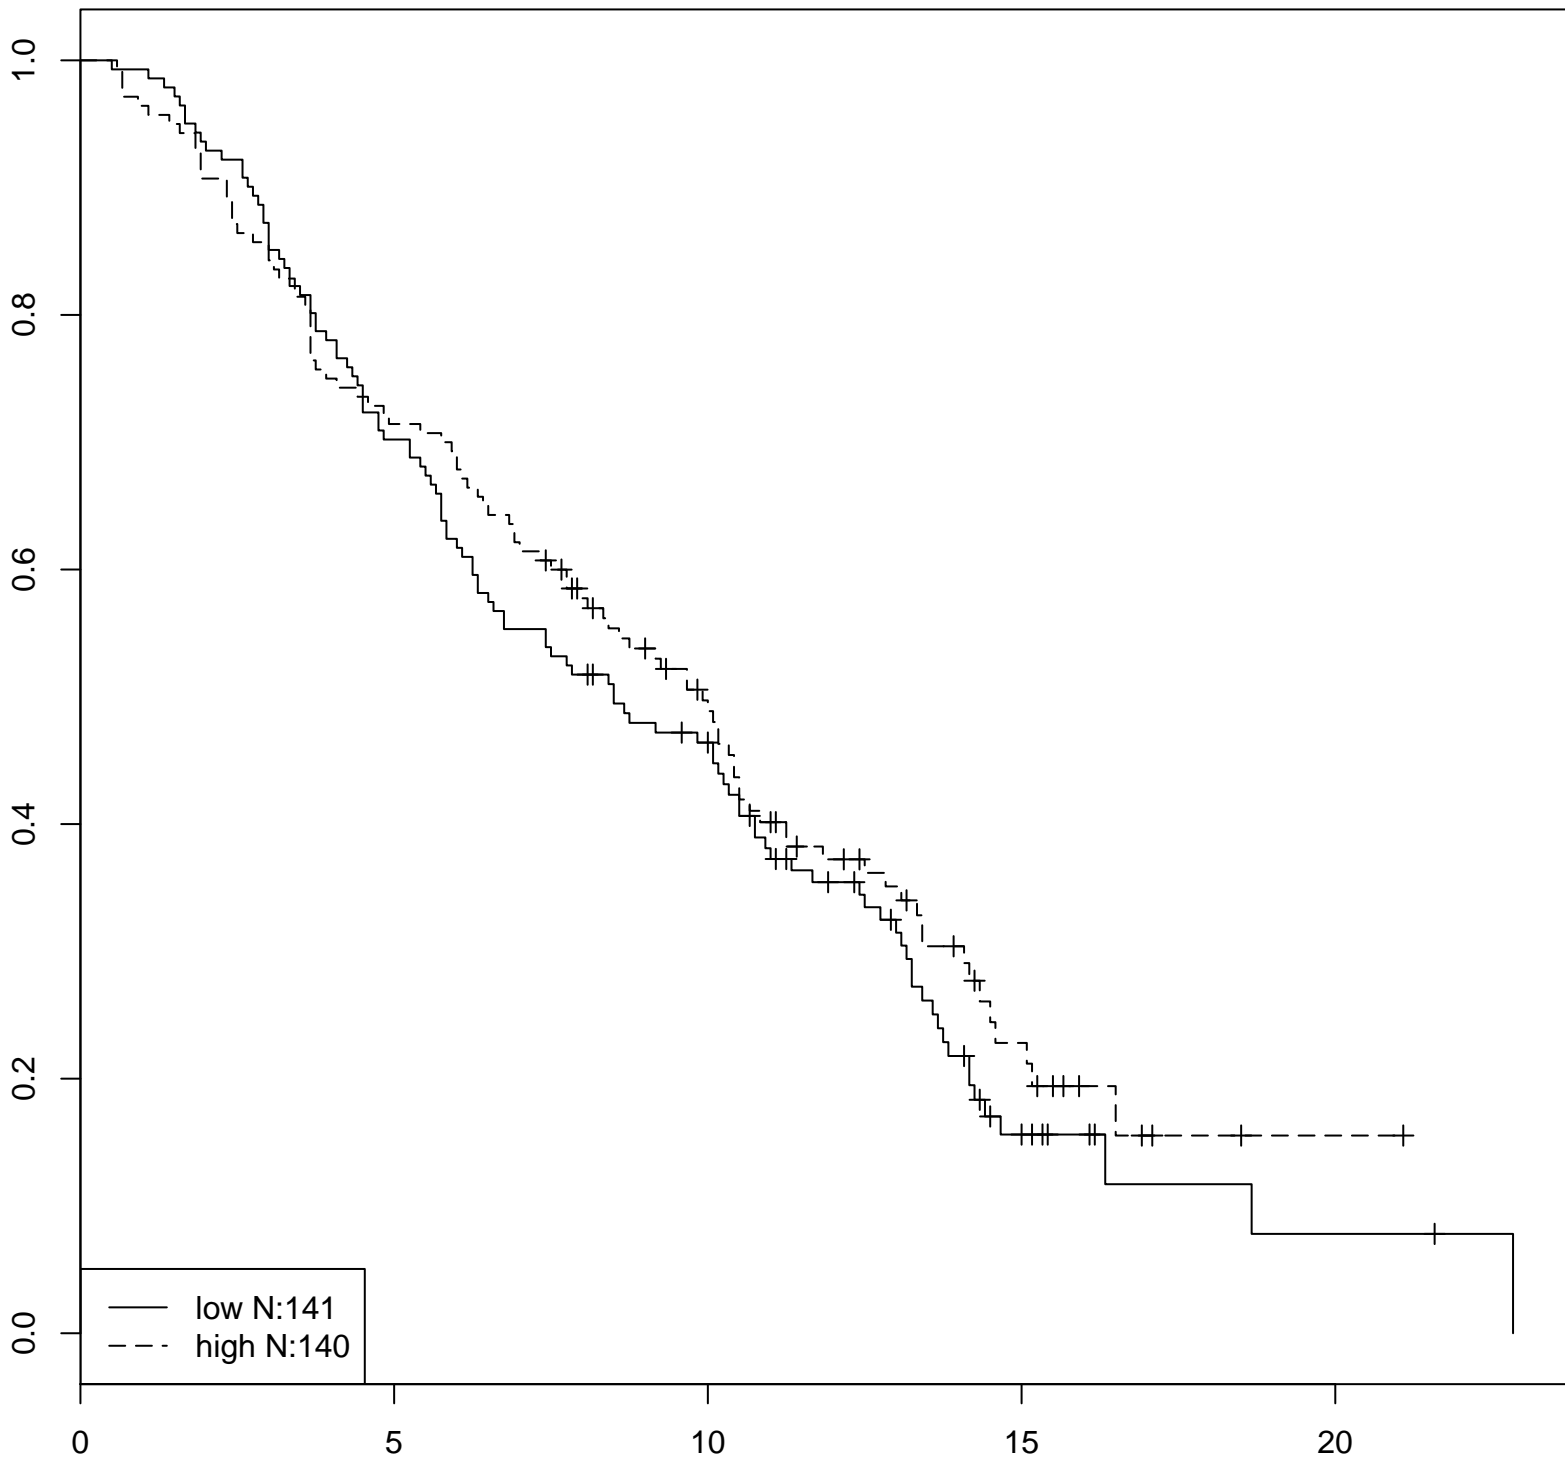

# Survival by RAD23B expression

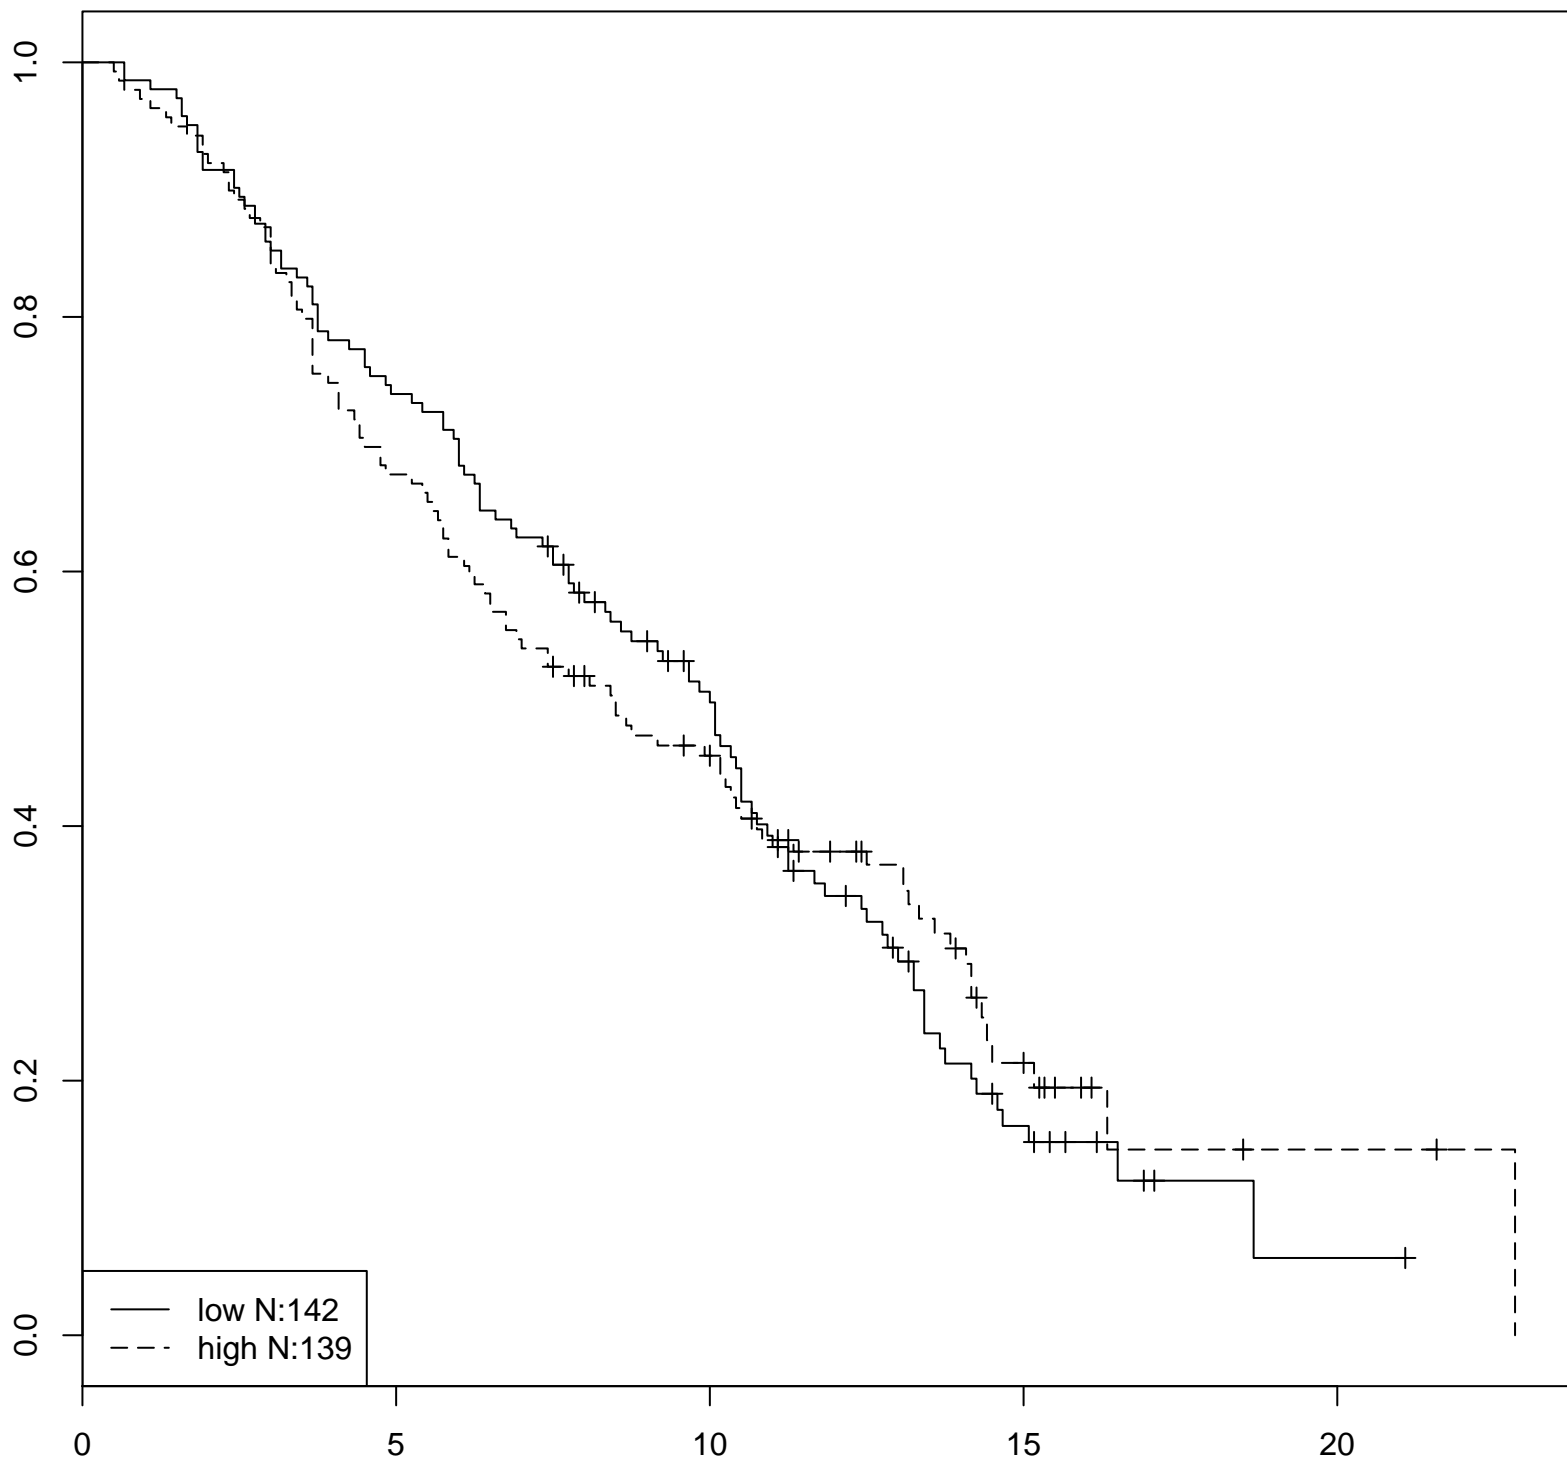

years

log-rank test p-value = 0.854

# Survival by RAGE expression

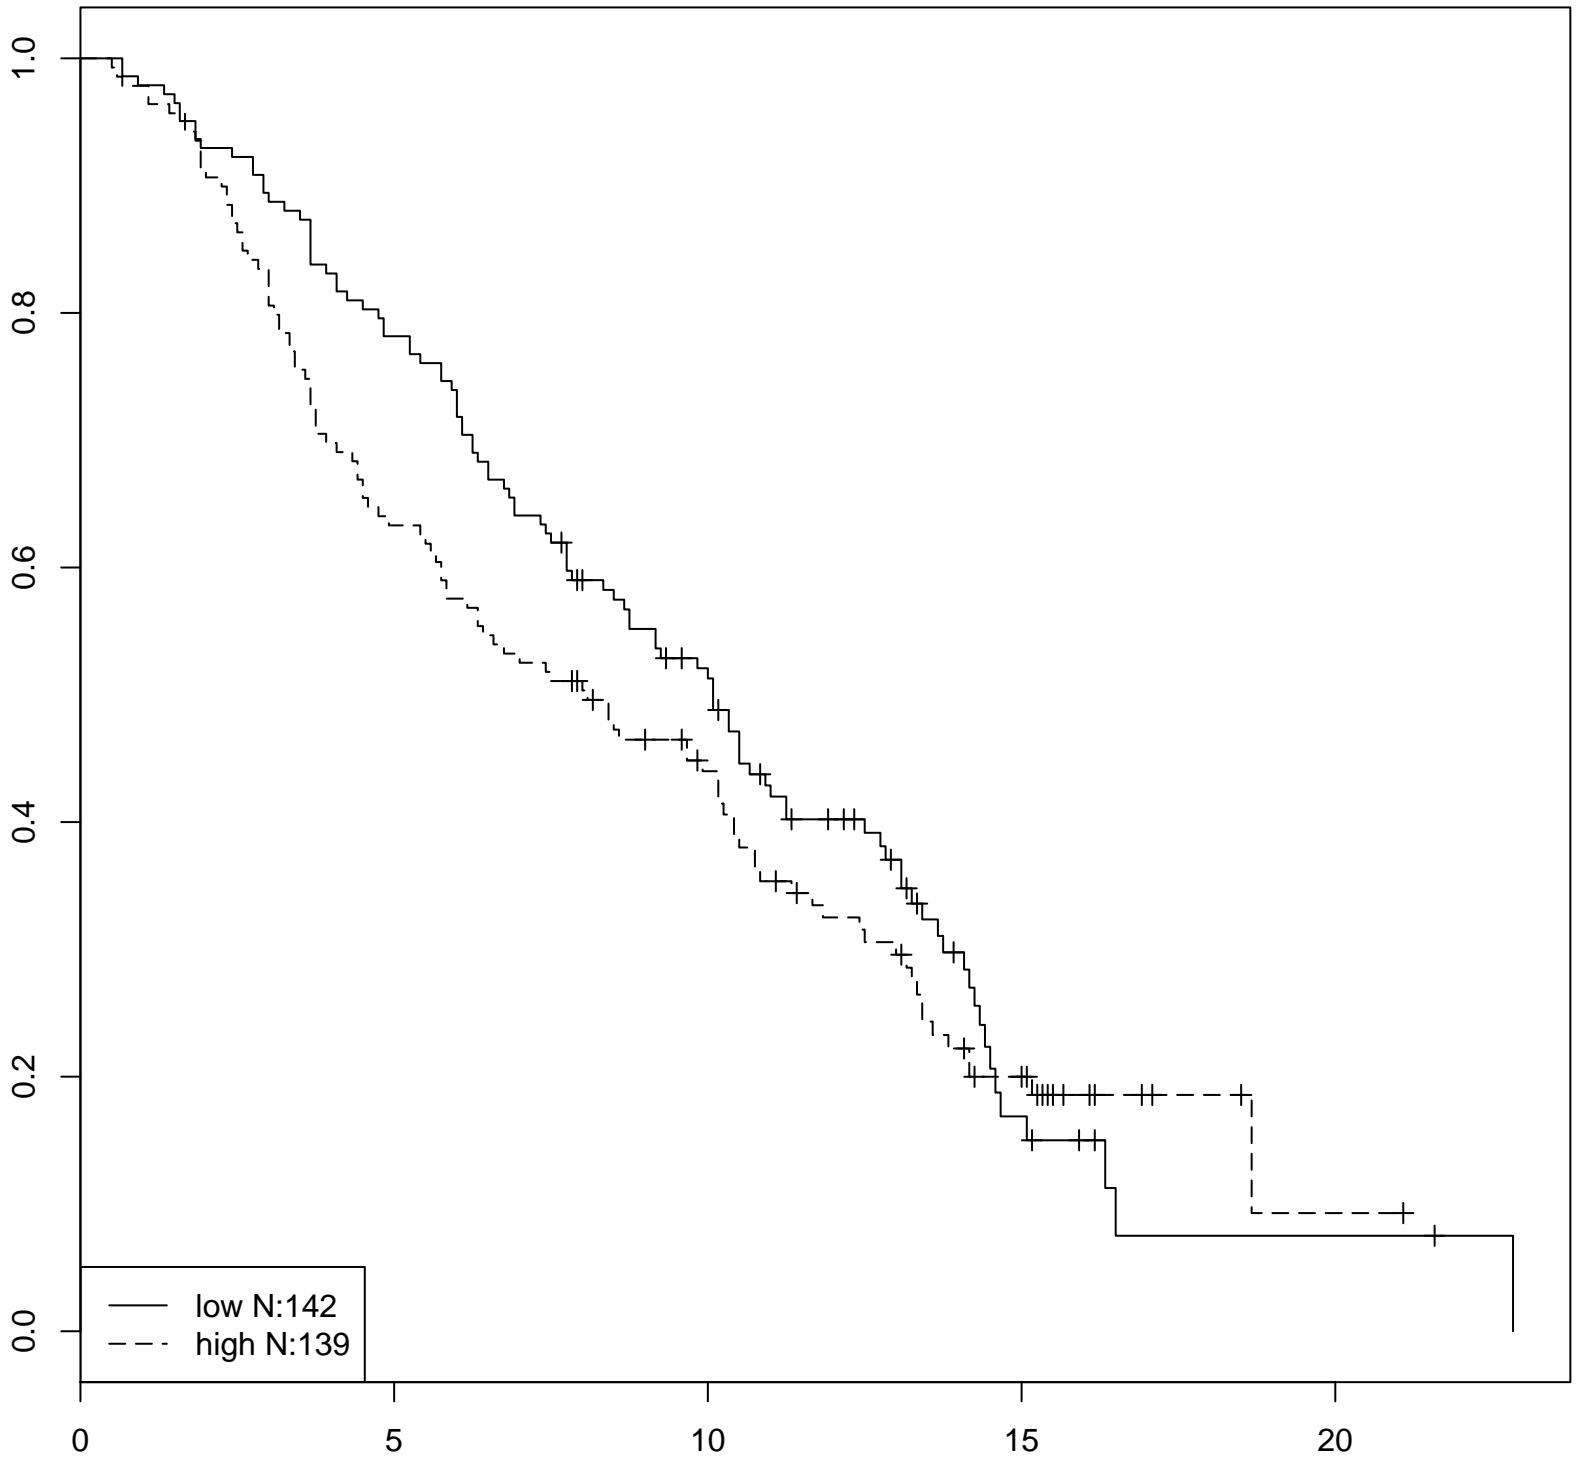

years

log-rank test p-value = 0.245

# Survival by RAMP1 expression

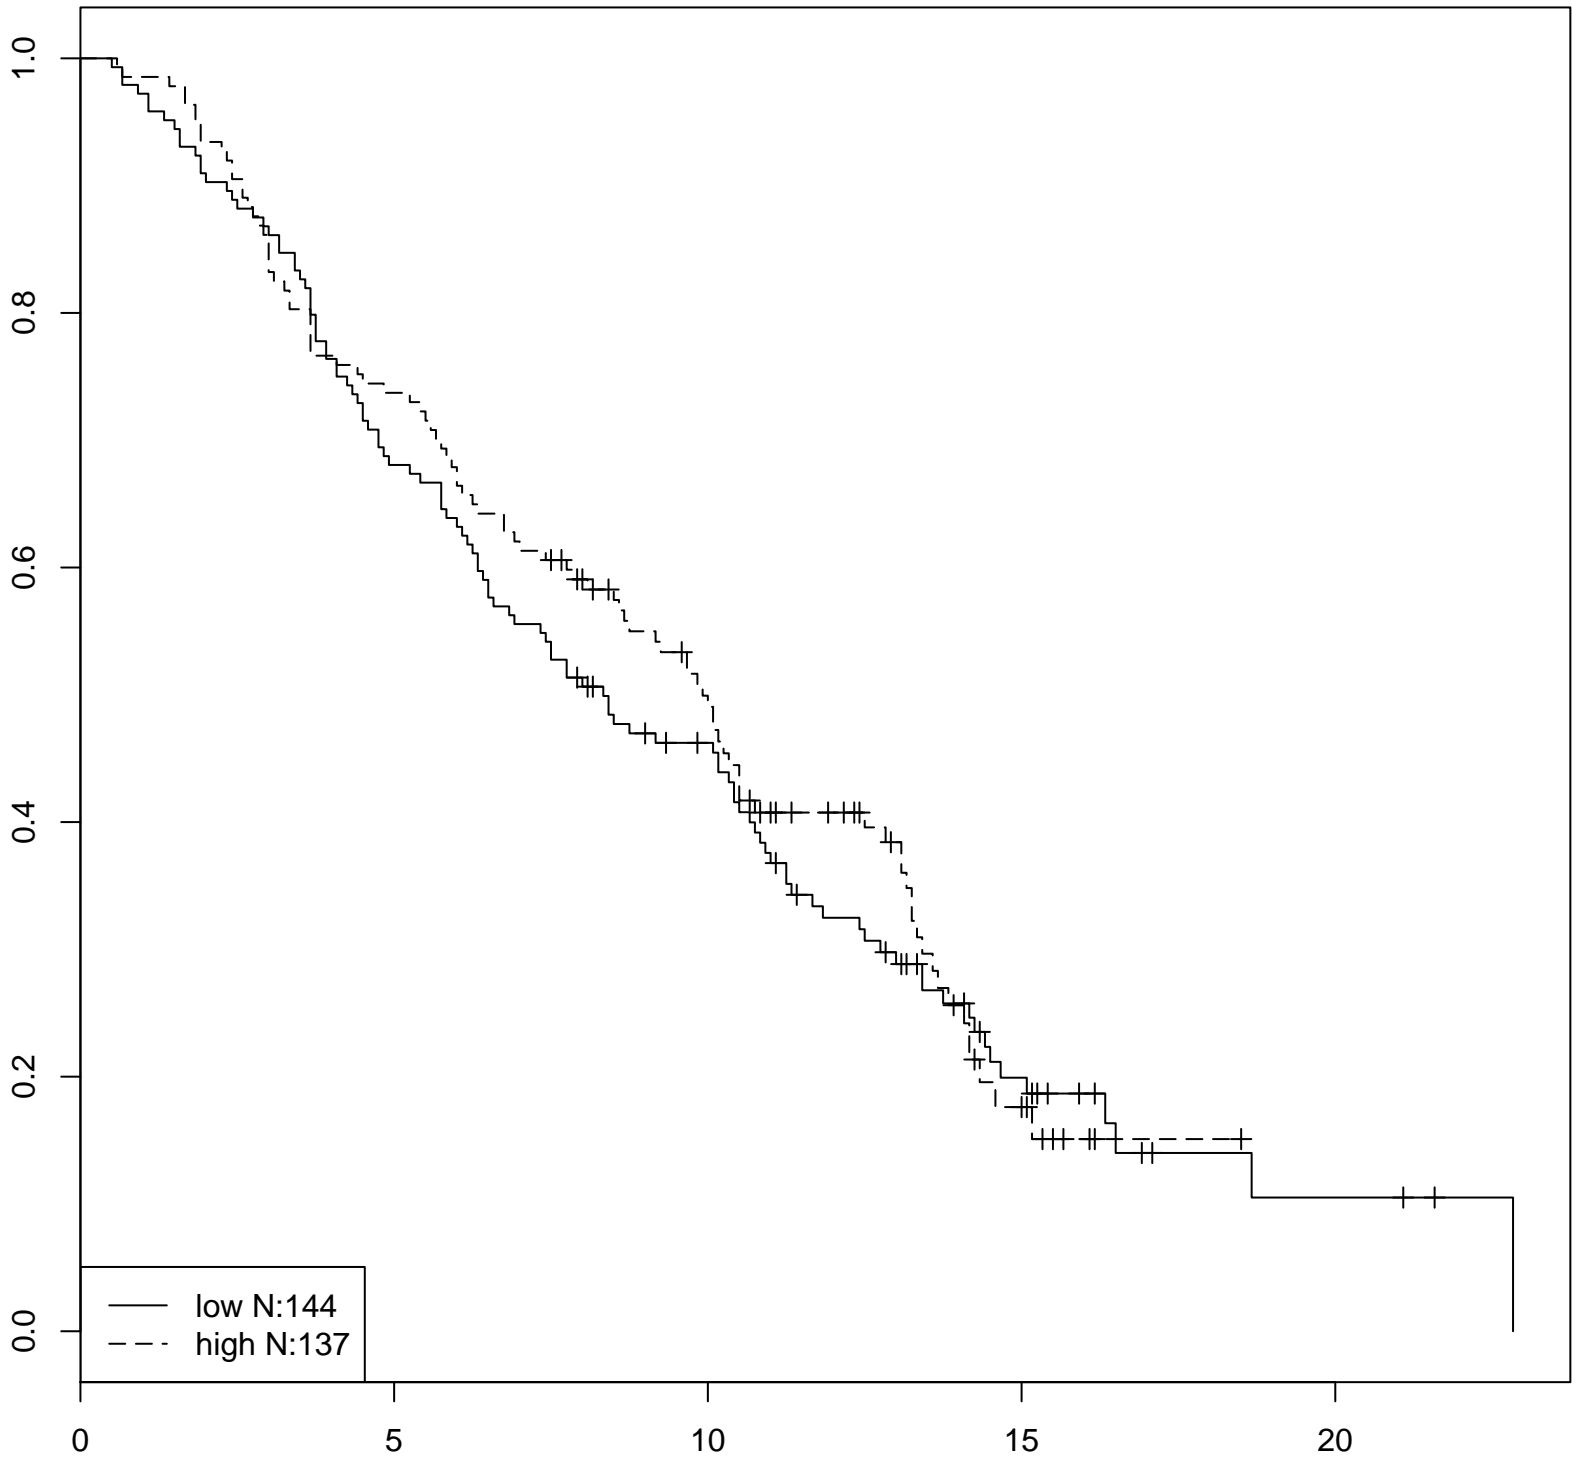

# Survival by RARB expression

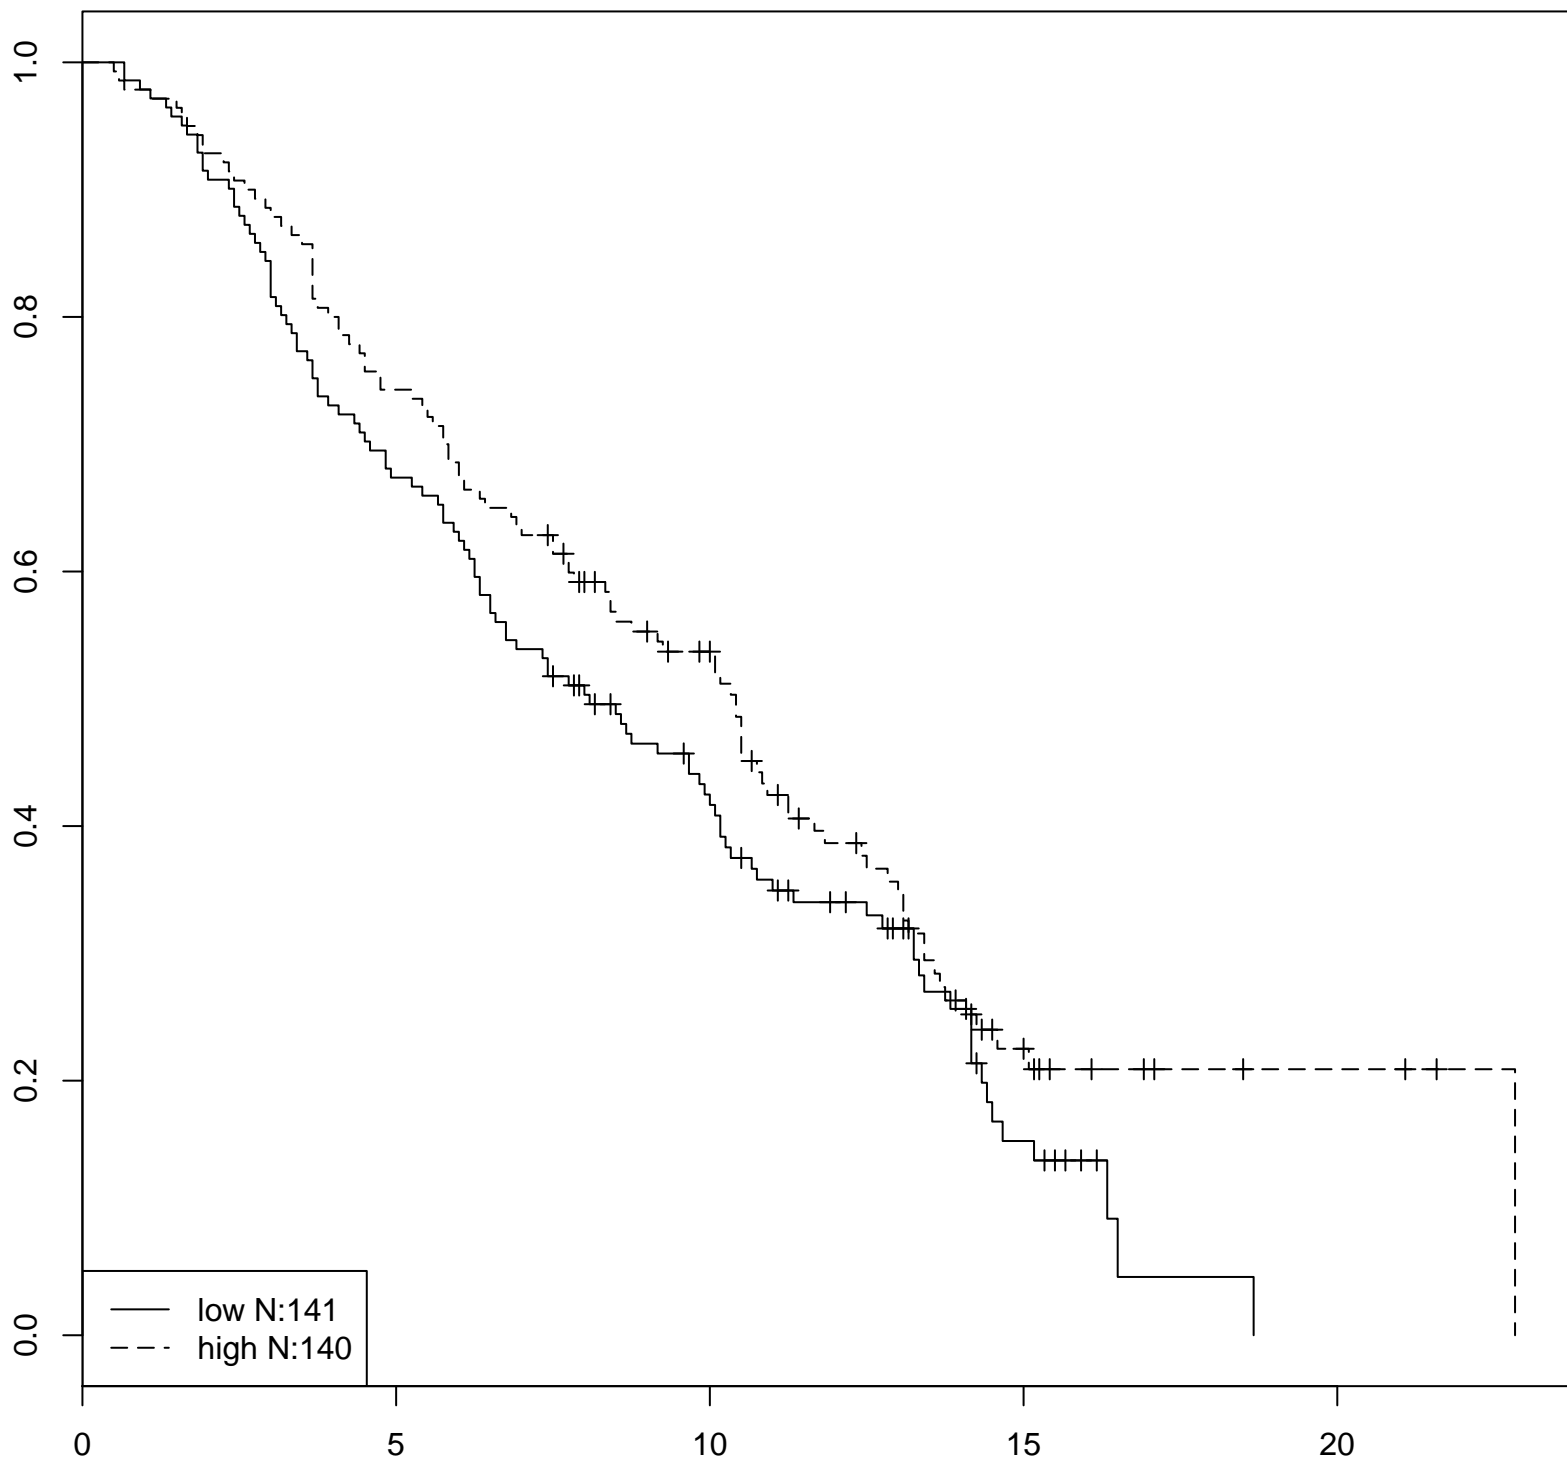

years

log-rank test p-value = 0.088

# Survival by RASSF2 expression

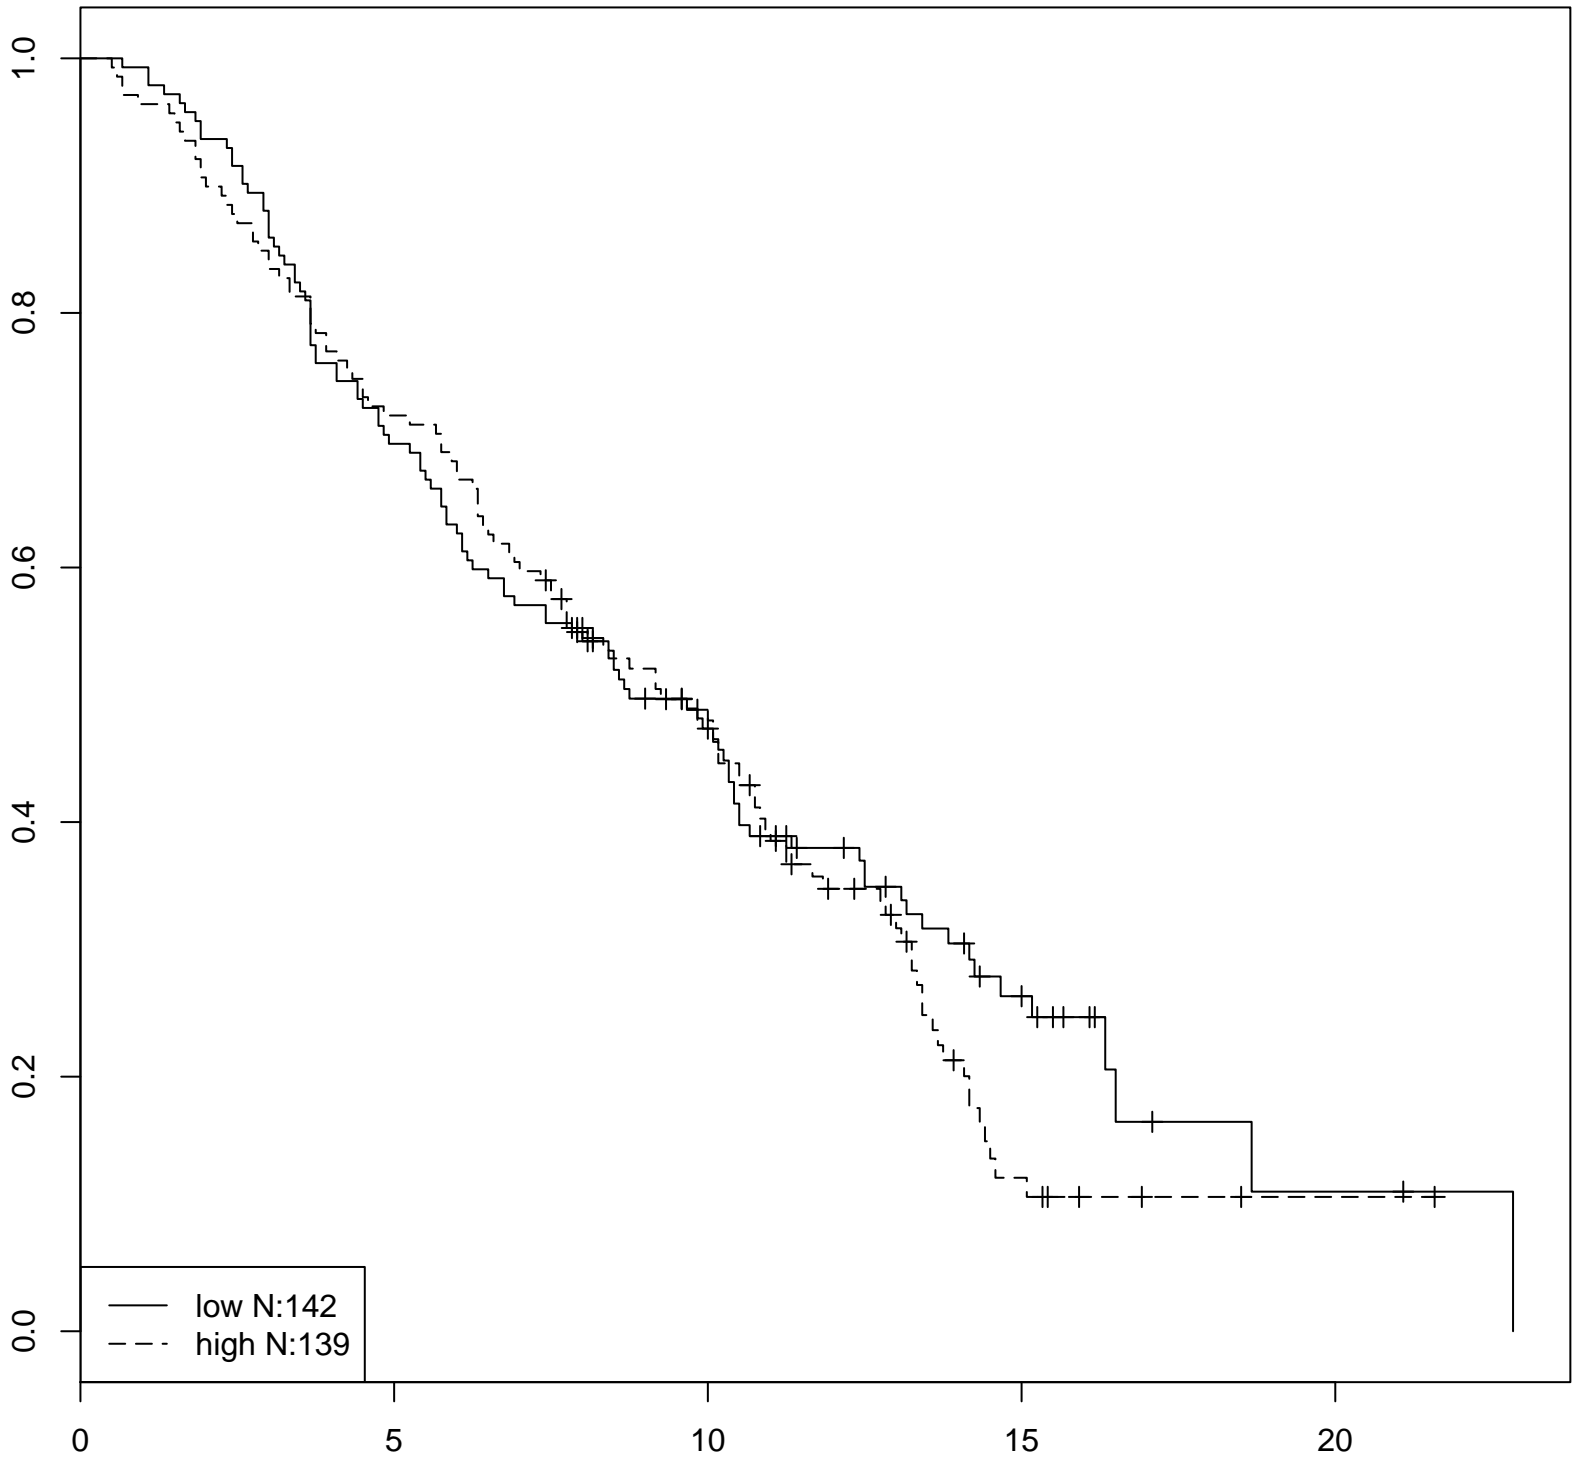

years

log-rank test p-value = 0.335

# Survival by RDH11 expression

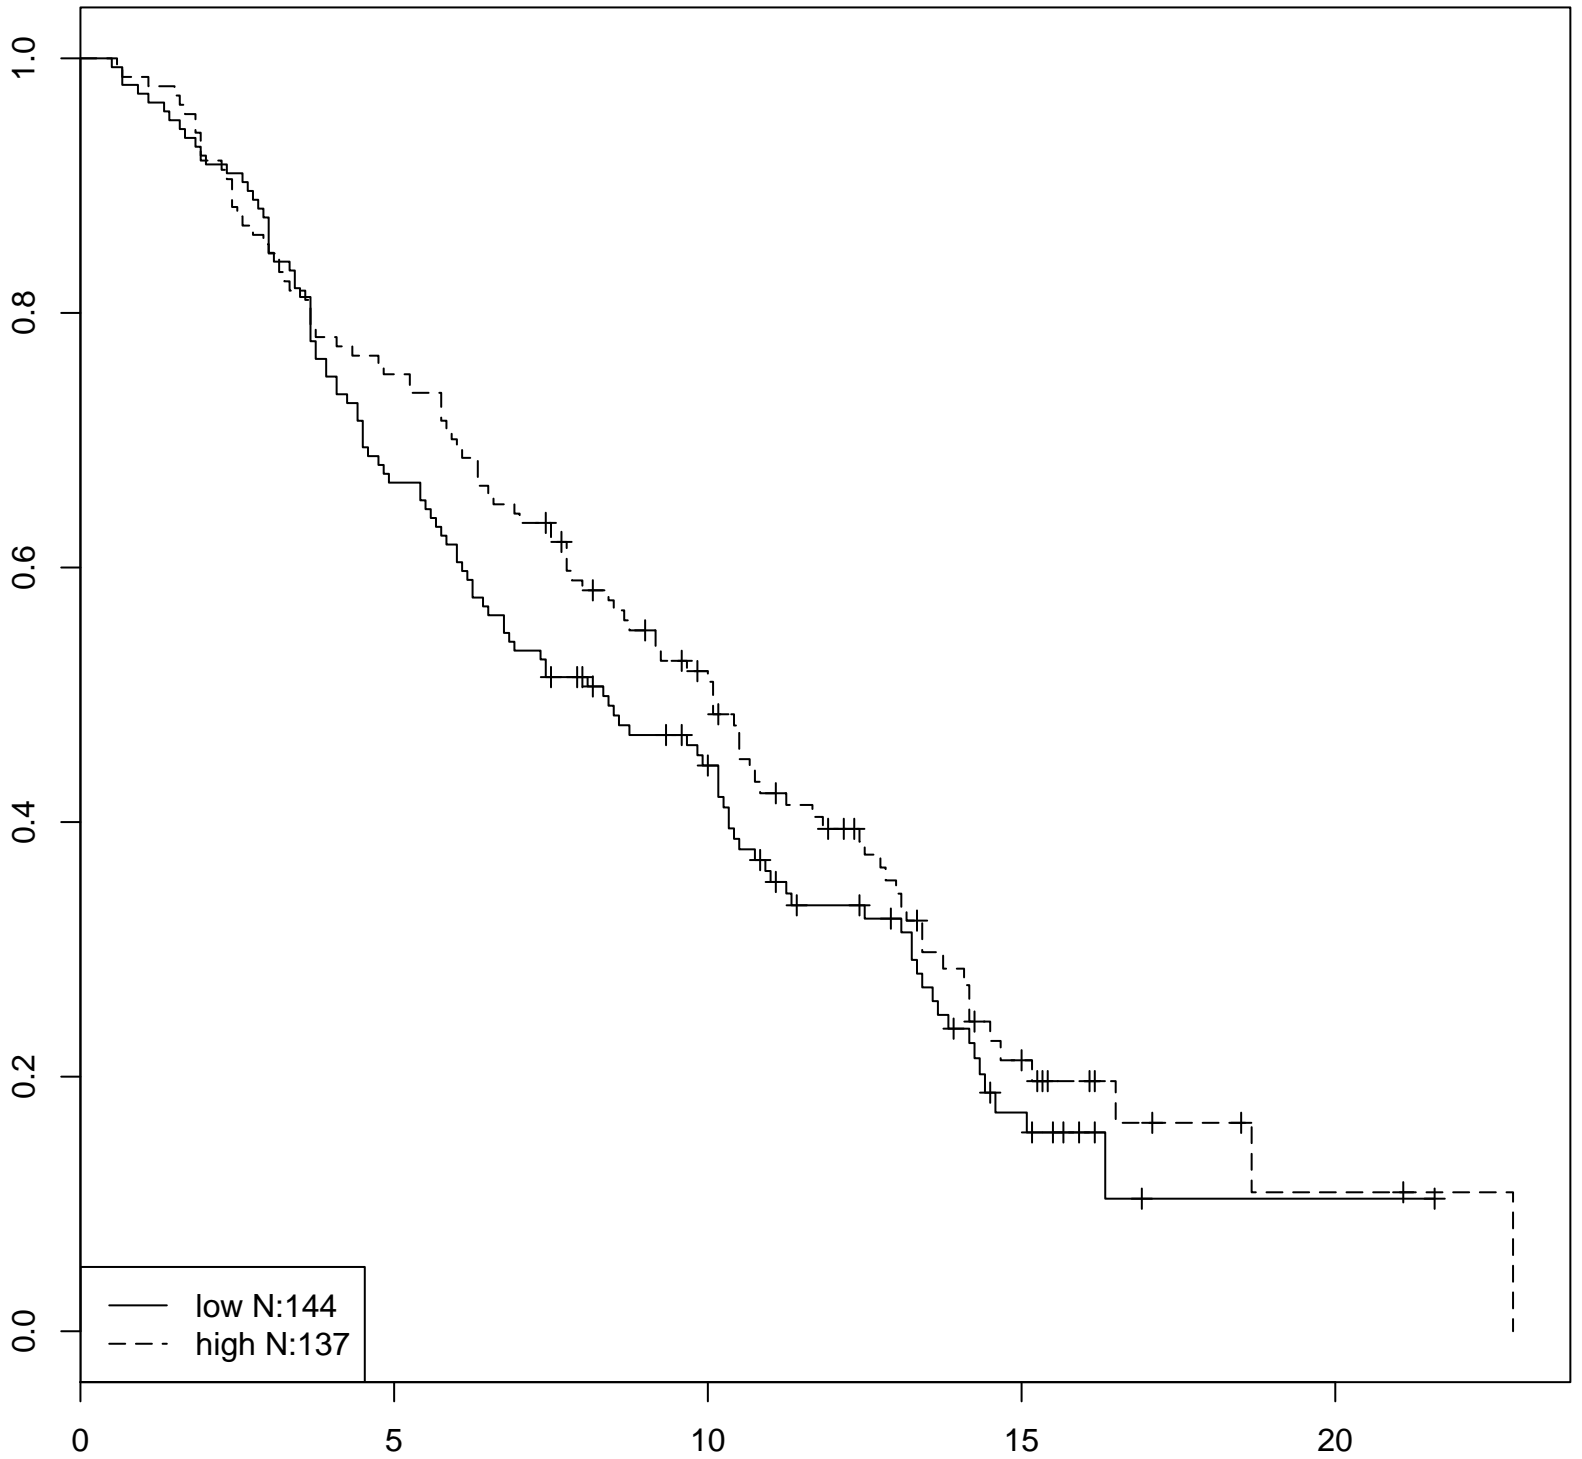

years

log-rank test p-value = 0.242

# Survival by RND3 expression

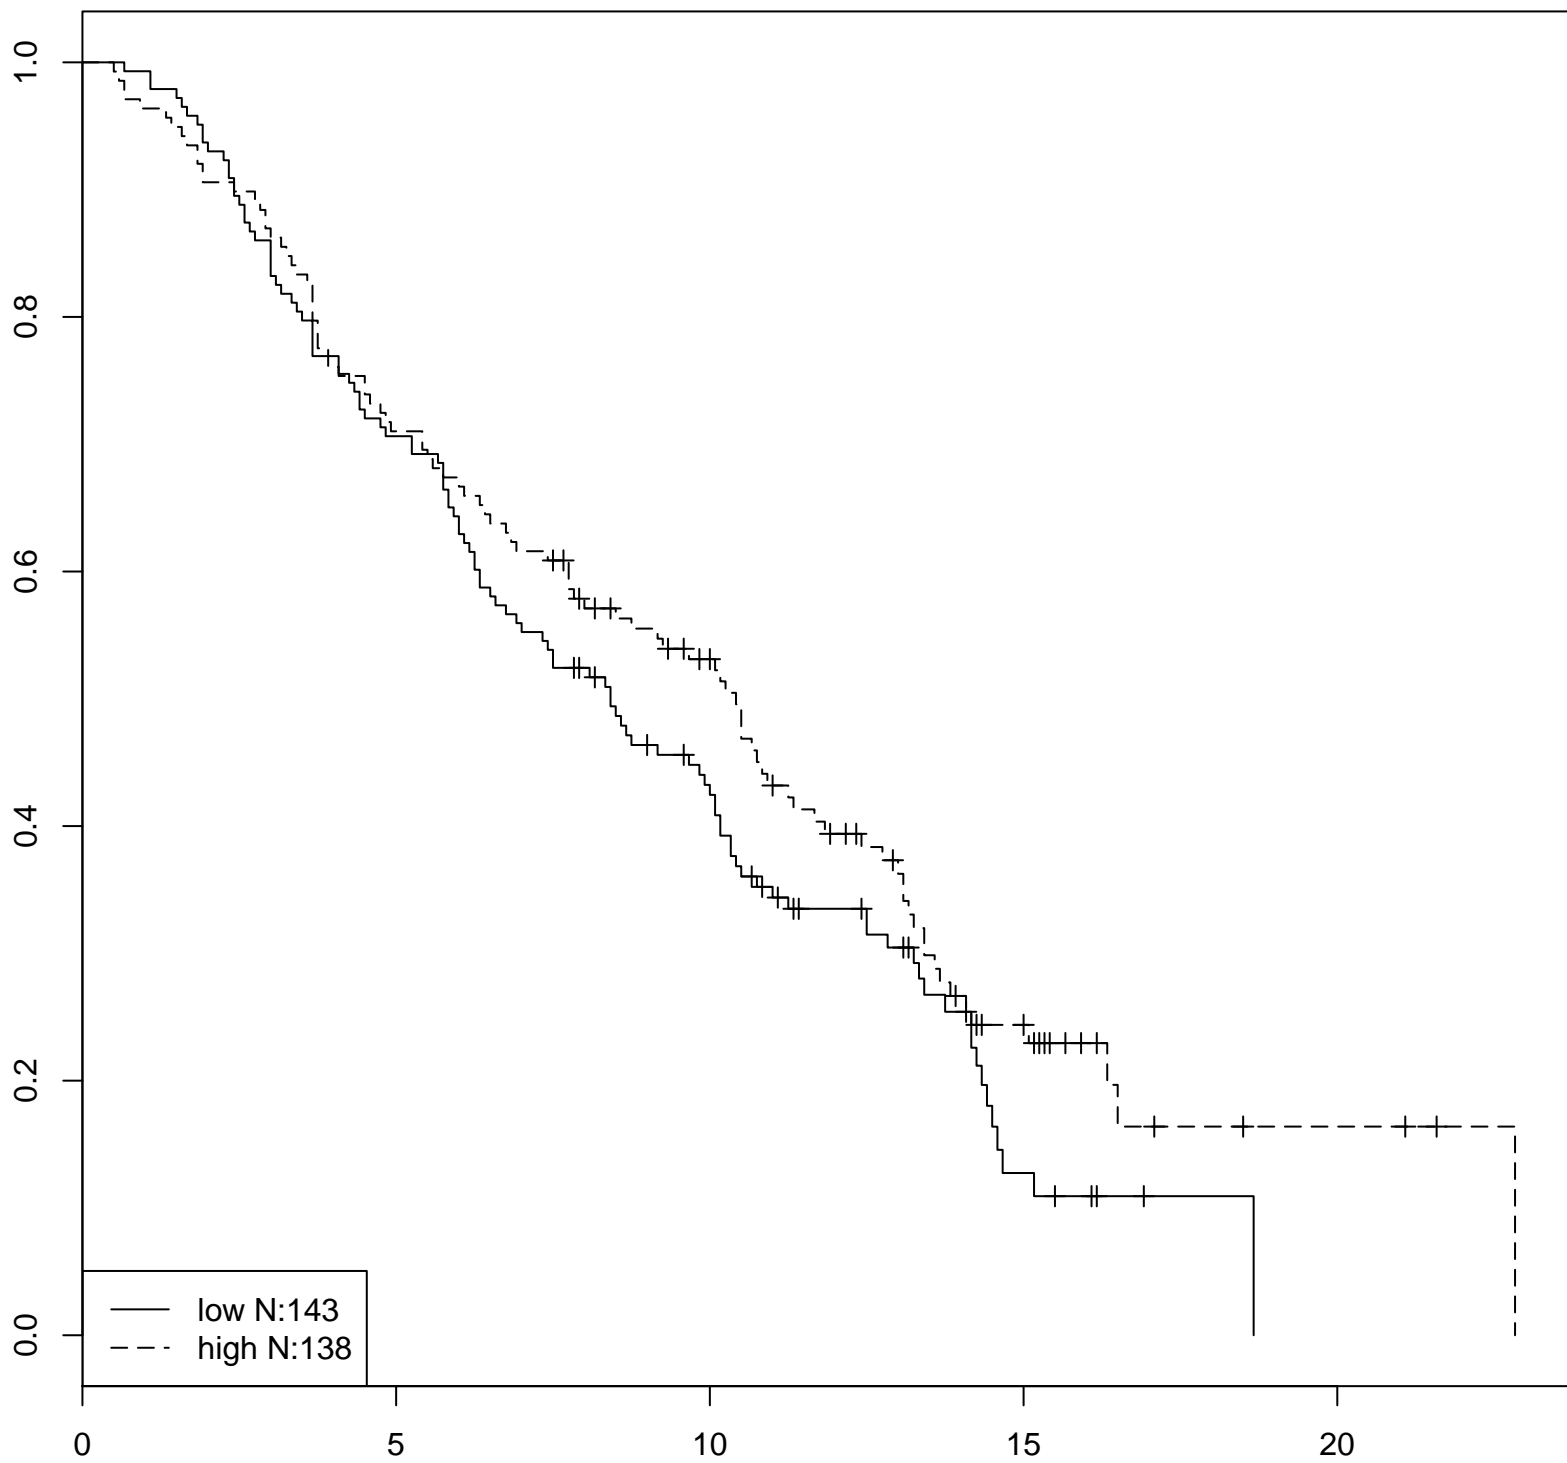

log-rank test p-value = 0.123



# Survival by S100A8 expression

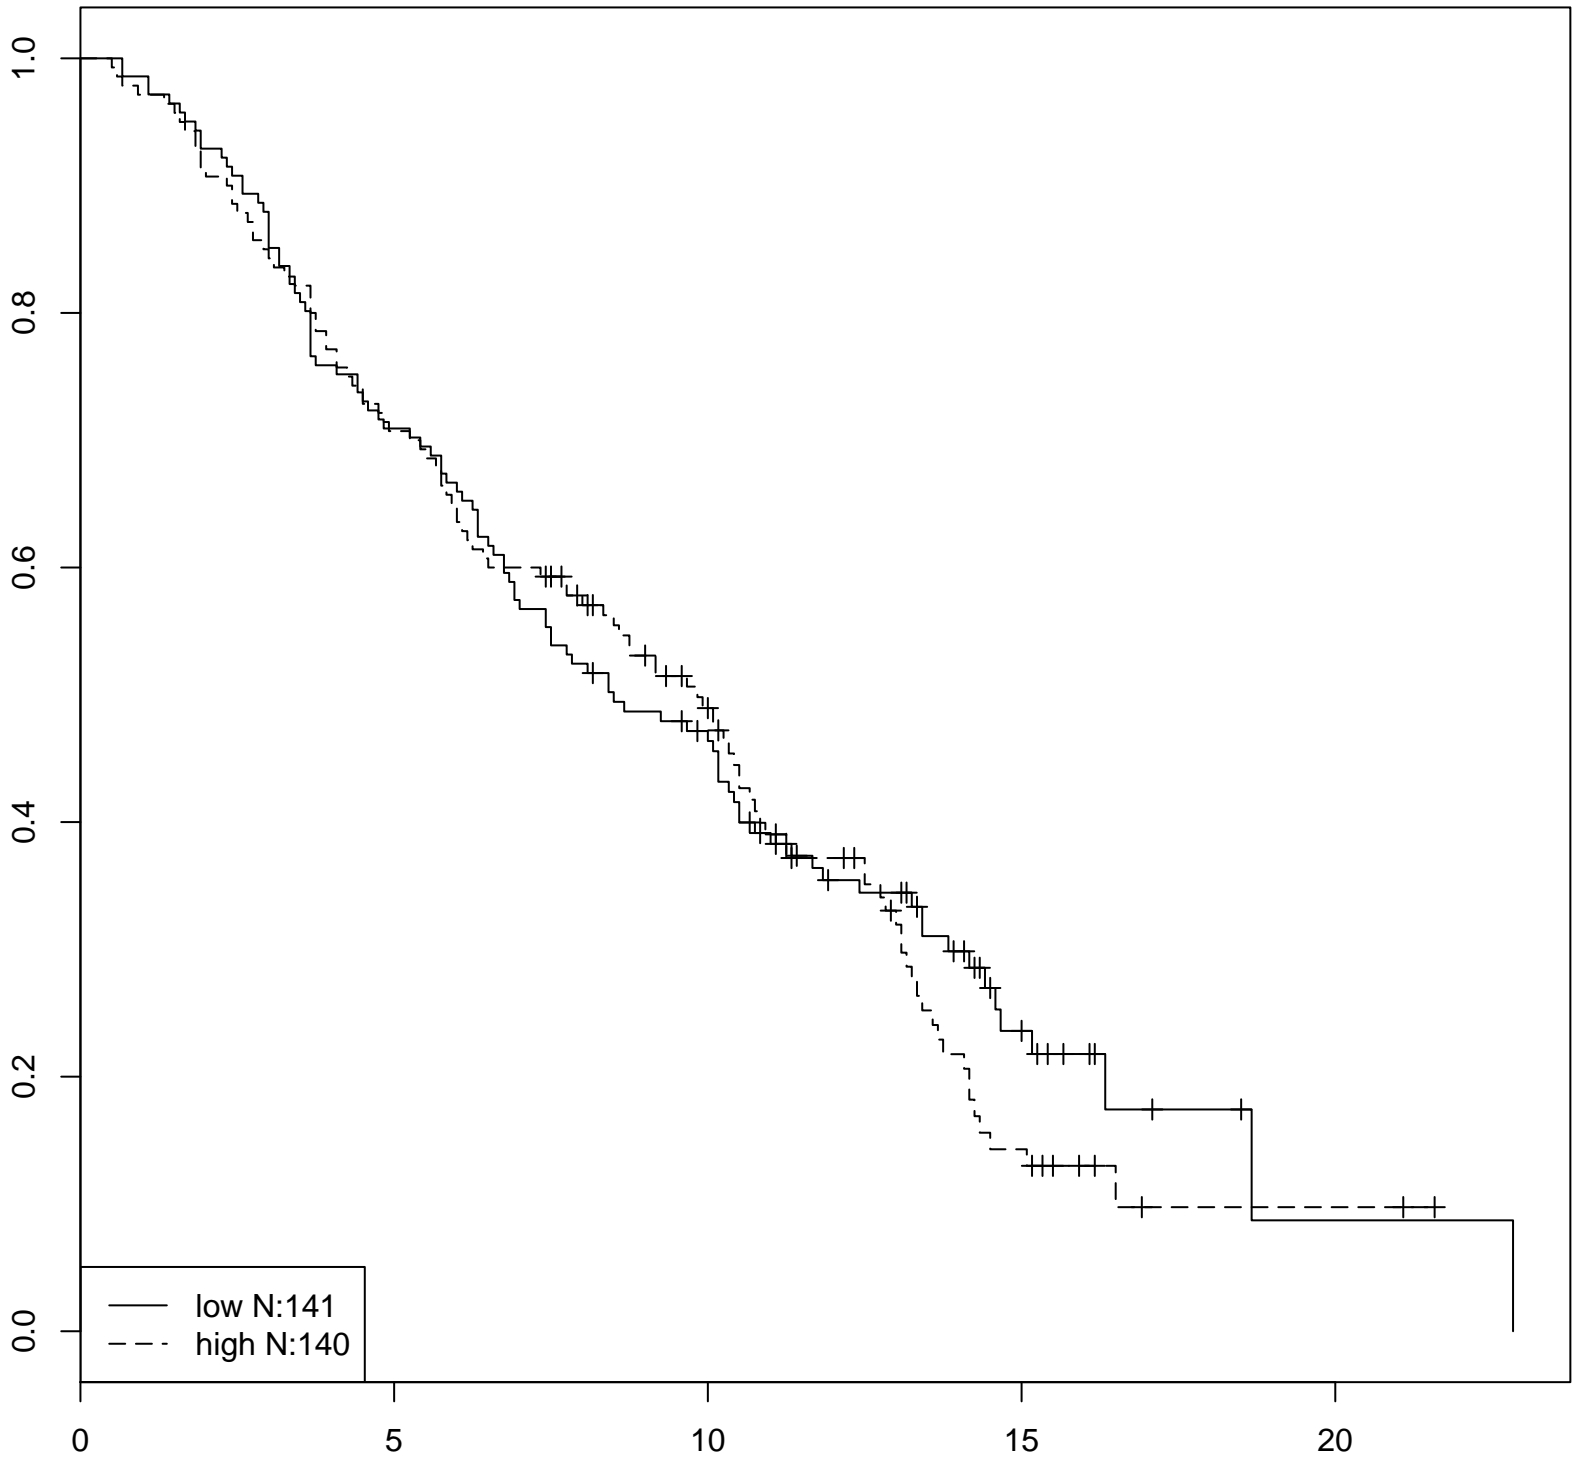

years

log-rank test p-value = 0.508

# Survival by S100A9 expression

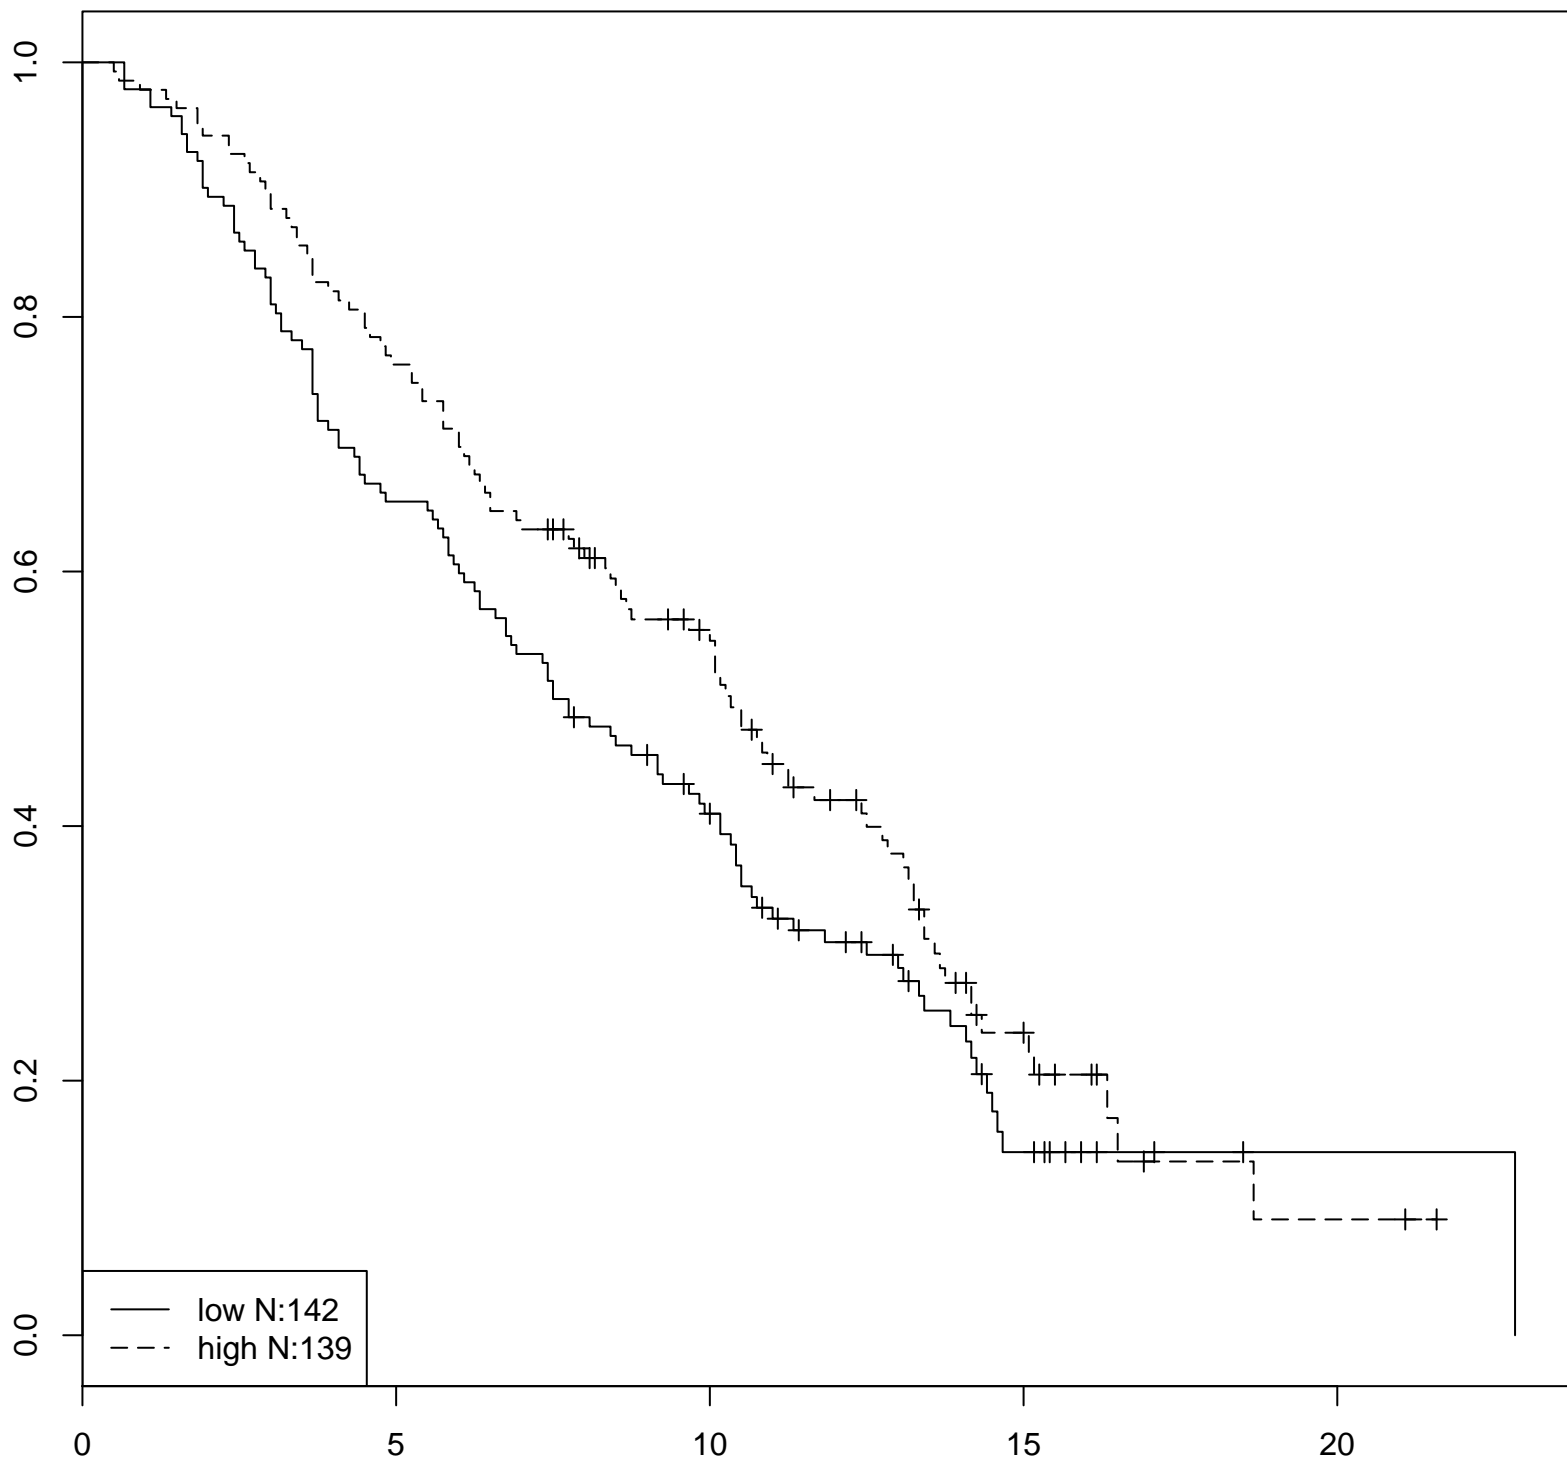

# Survival by SCGN expression

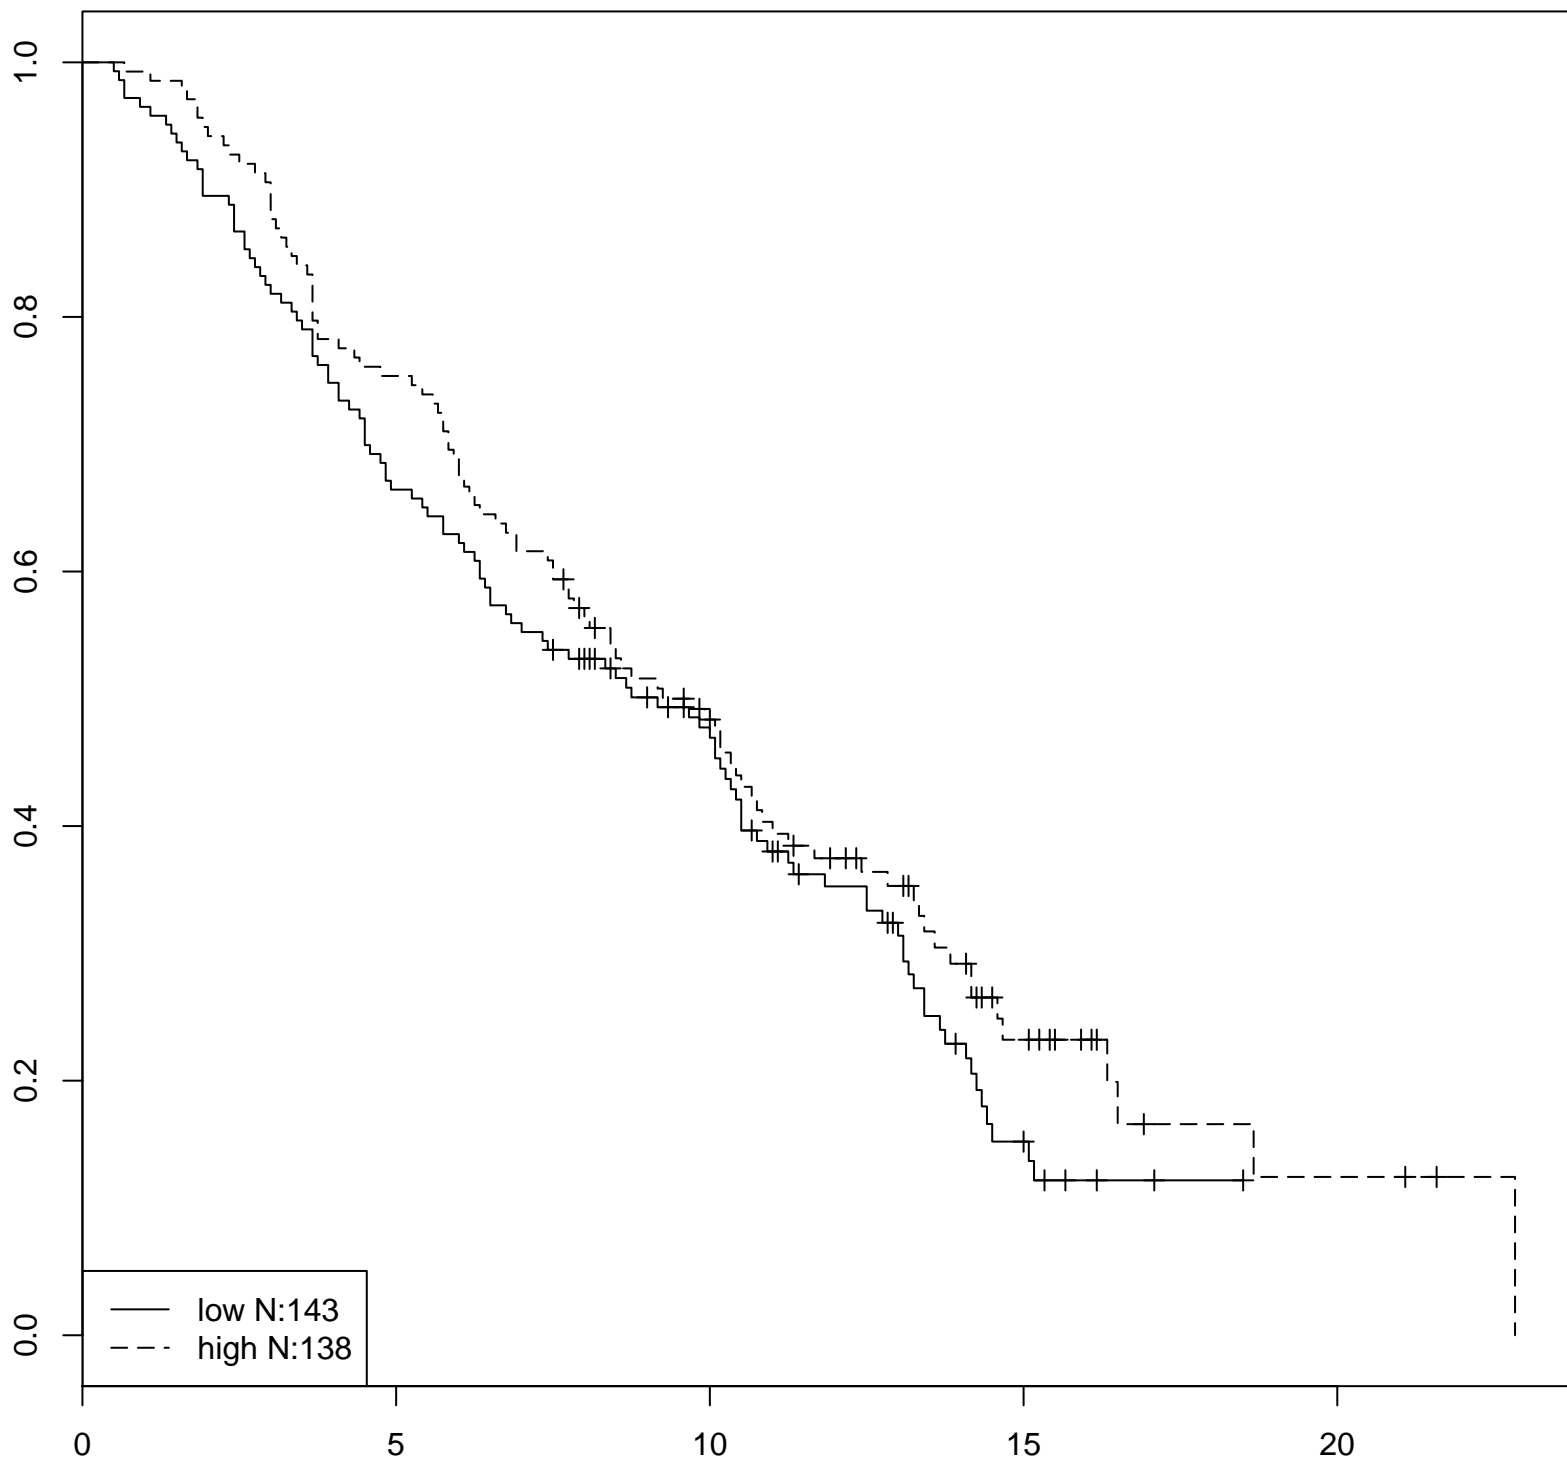

years

log-rank test p-value = 0.189

# Survival by SDC1 expression

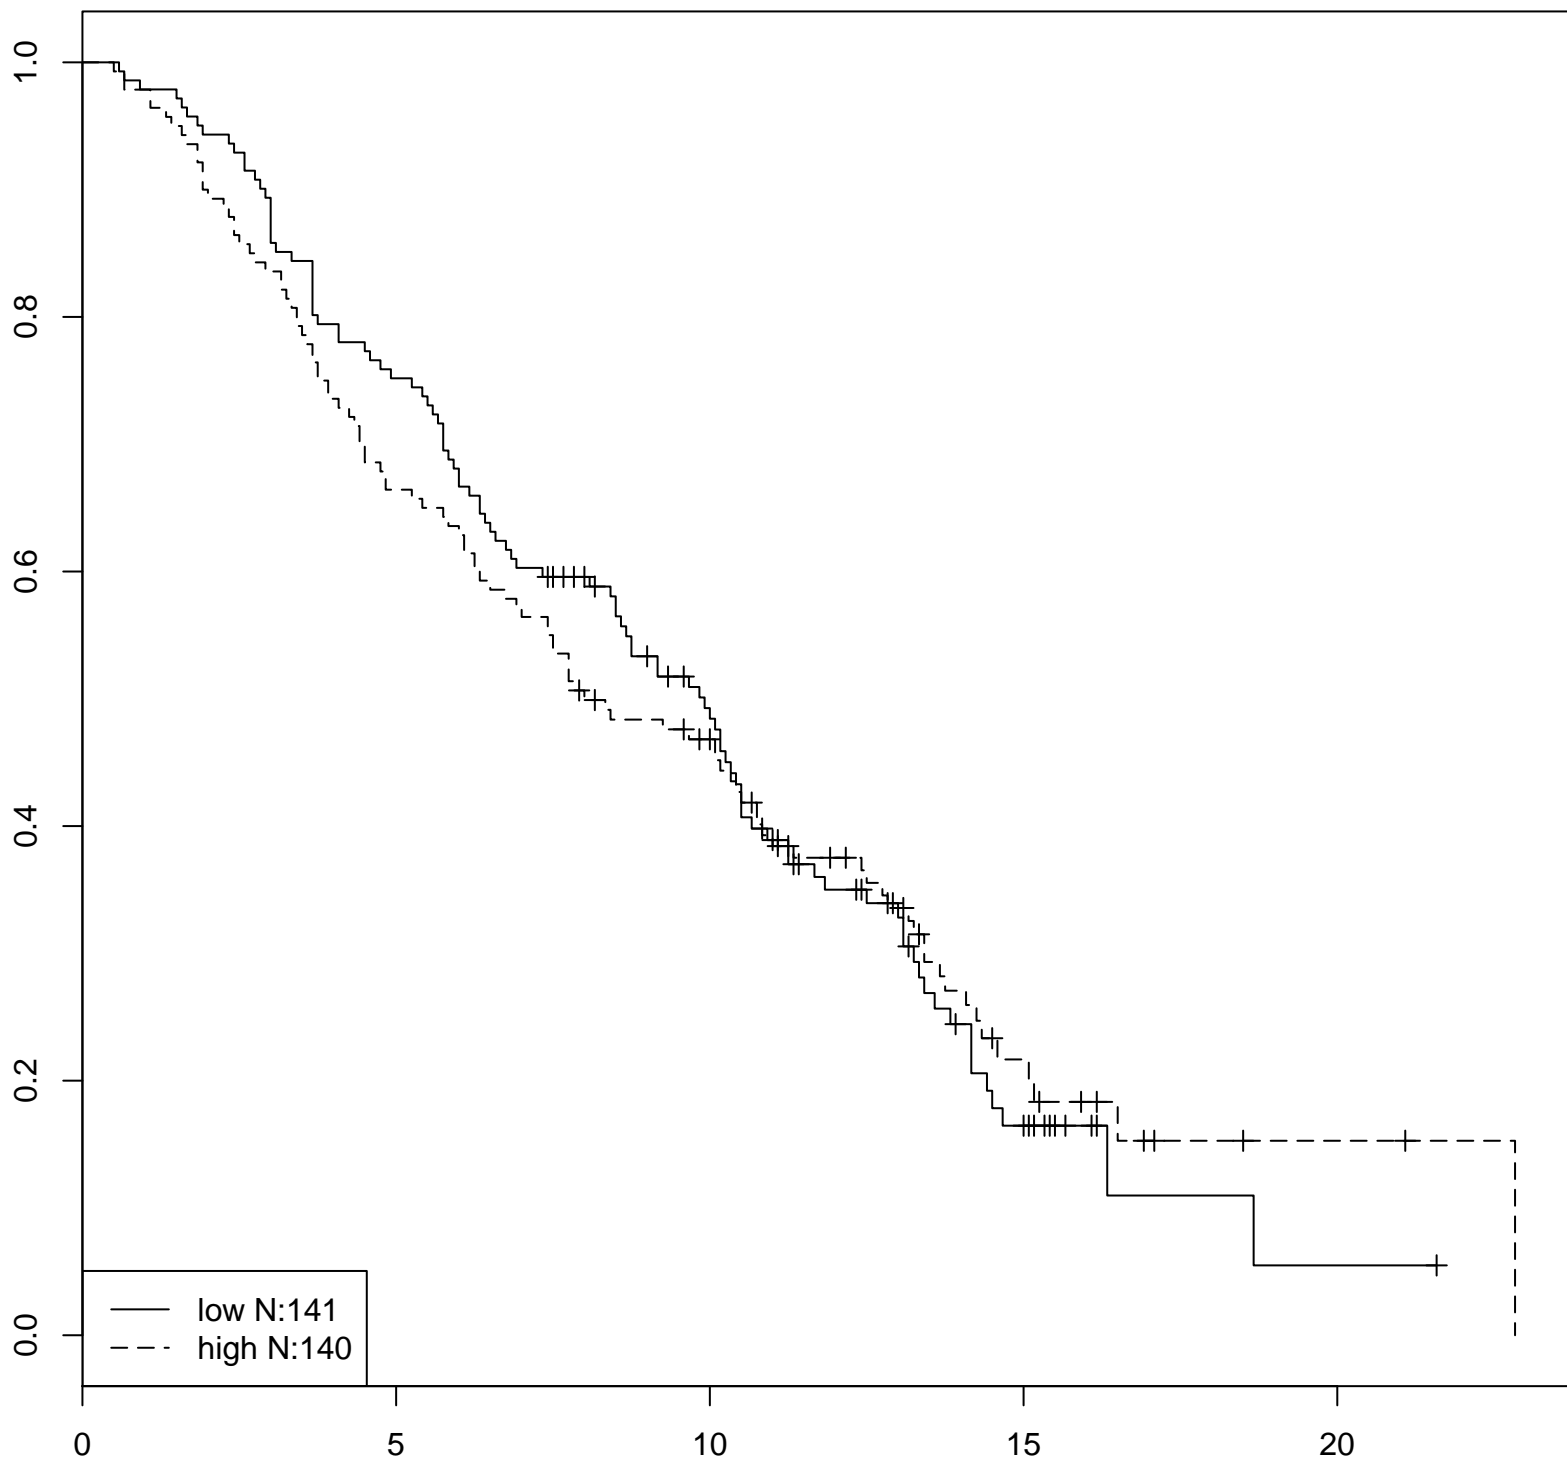

years

log-rank test p-value = 0.949

# Survival by SDC2 expression

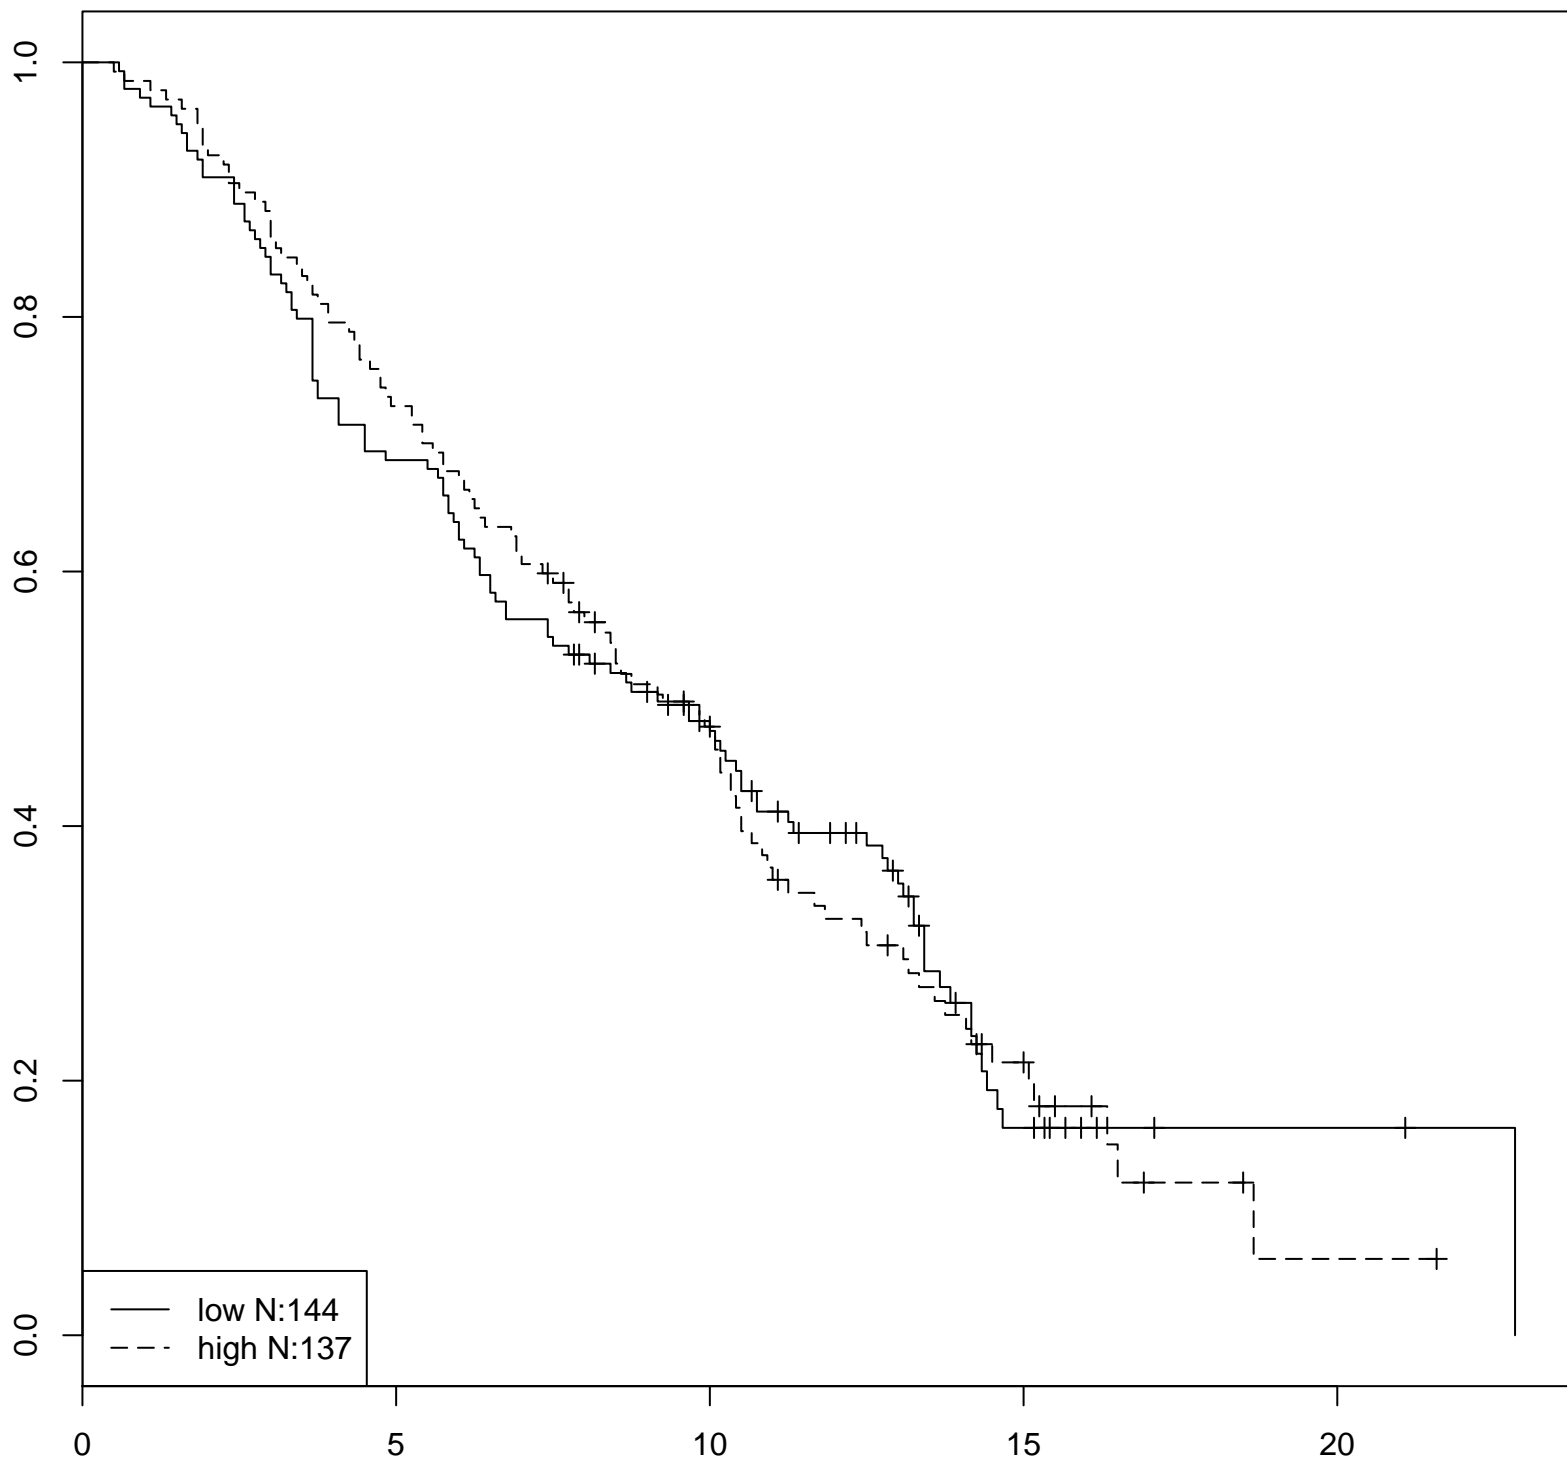

years

log-rank test p-value = 0.944

# Survival by SERPINA5 expression

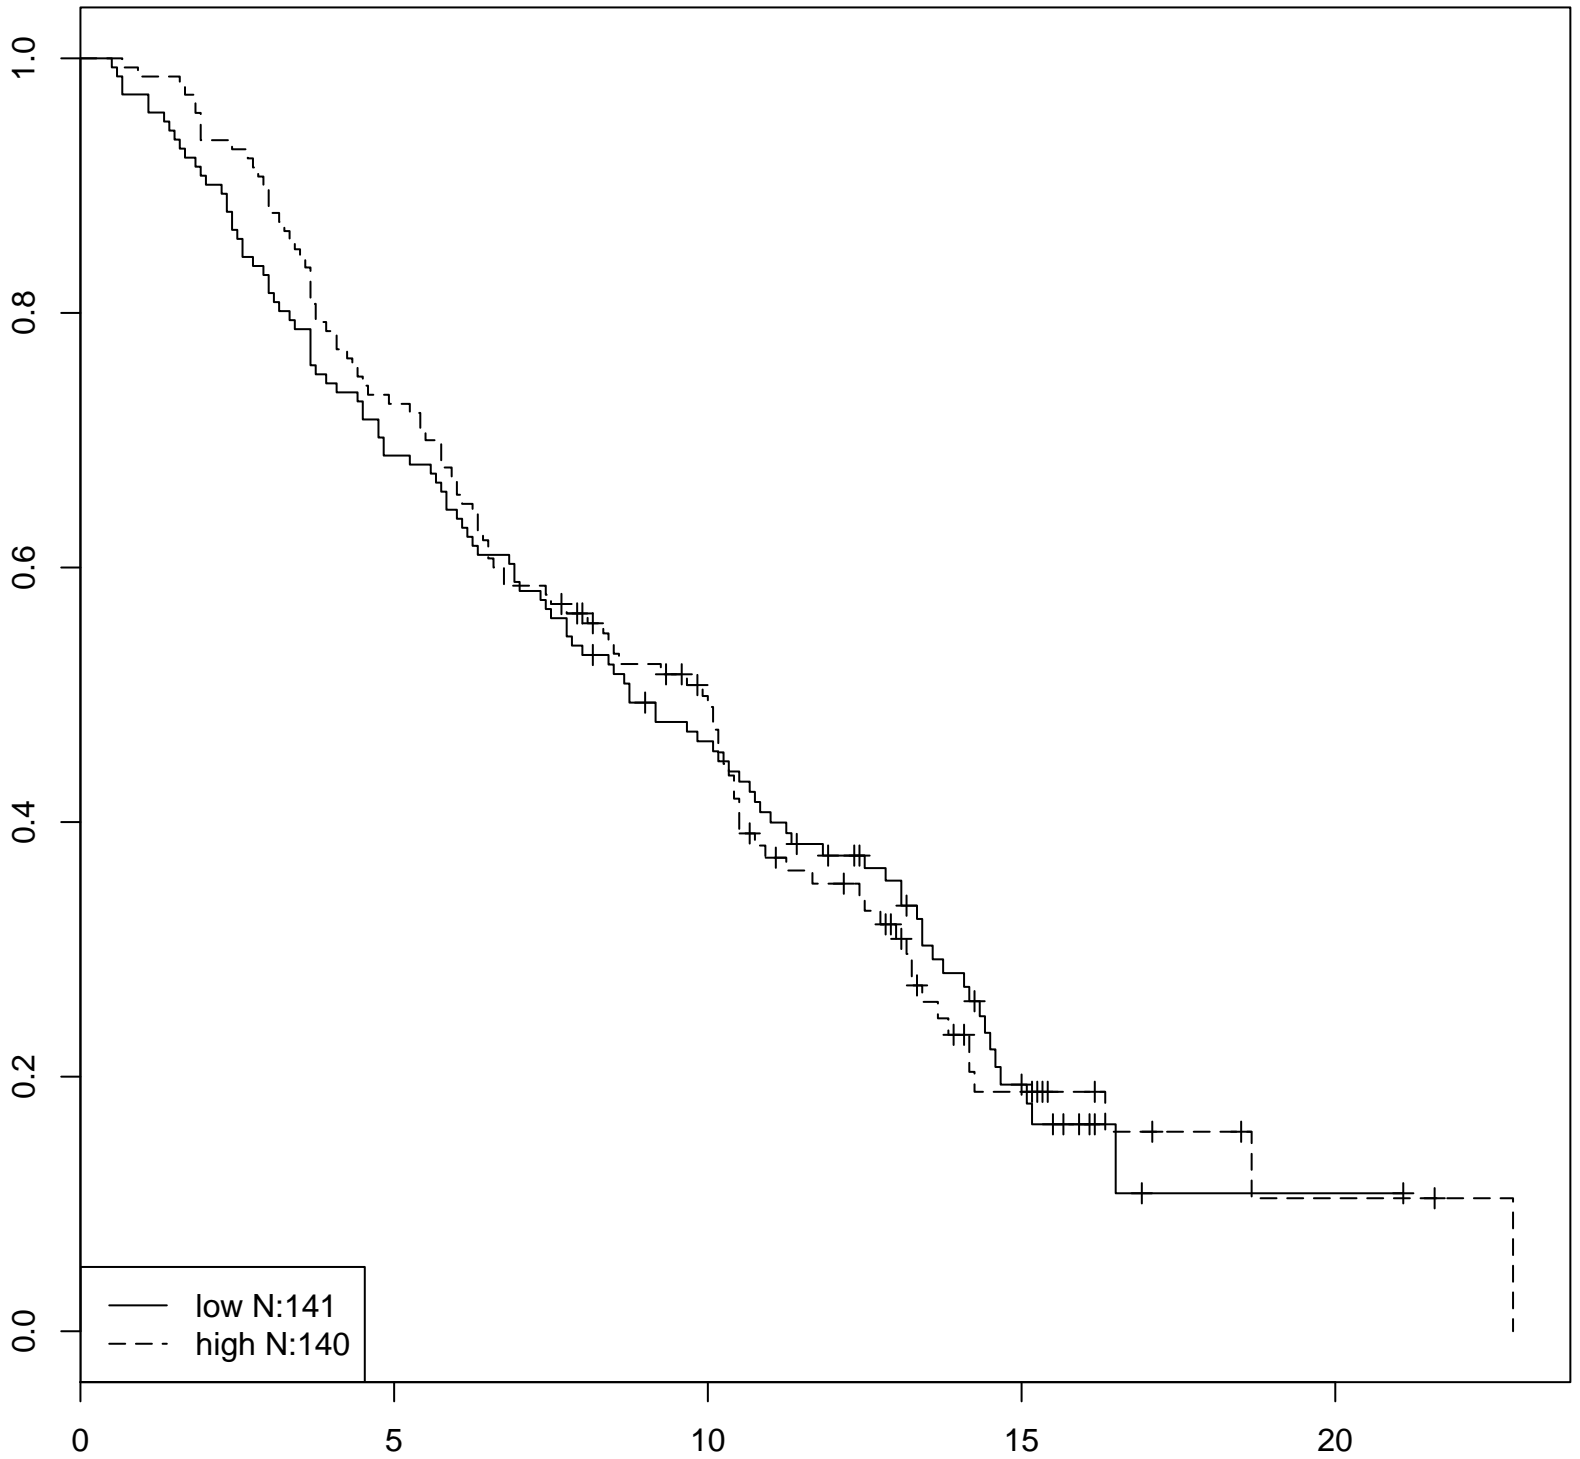

years

log-rank test p-value = 0.951

# Survival by SERPINF1 expression

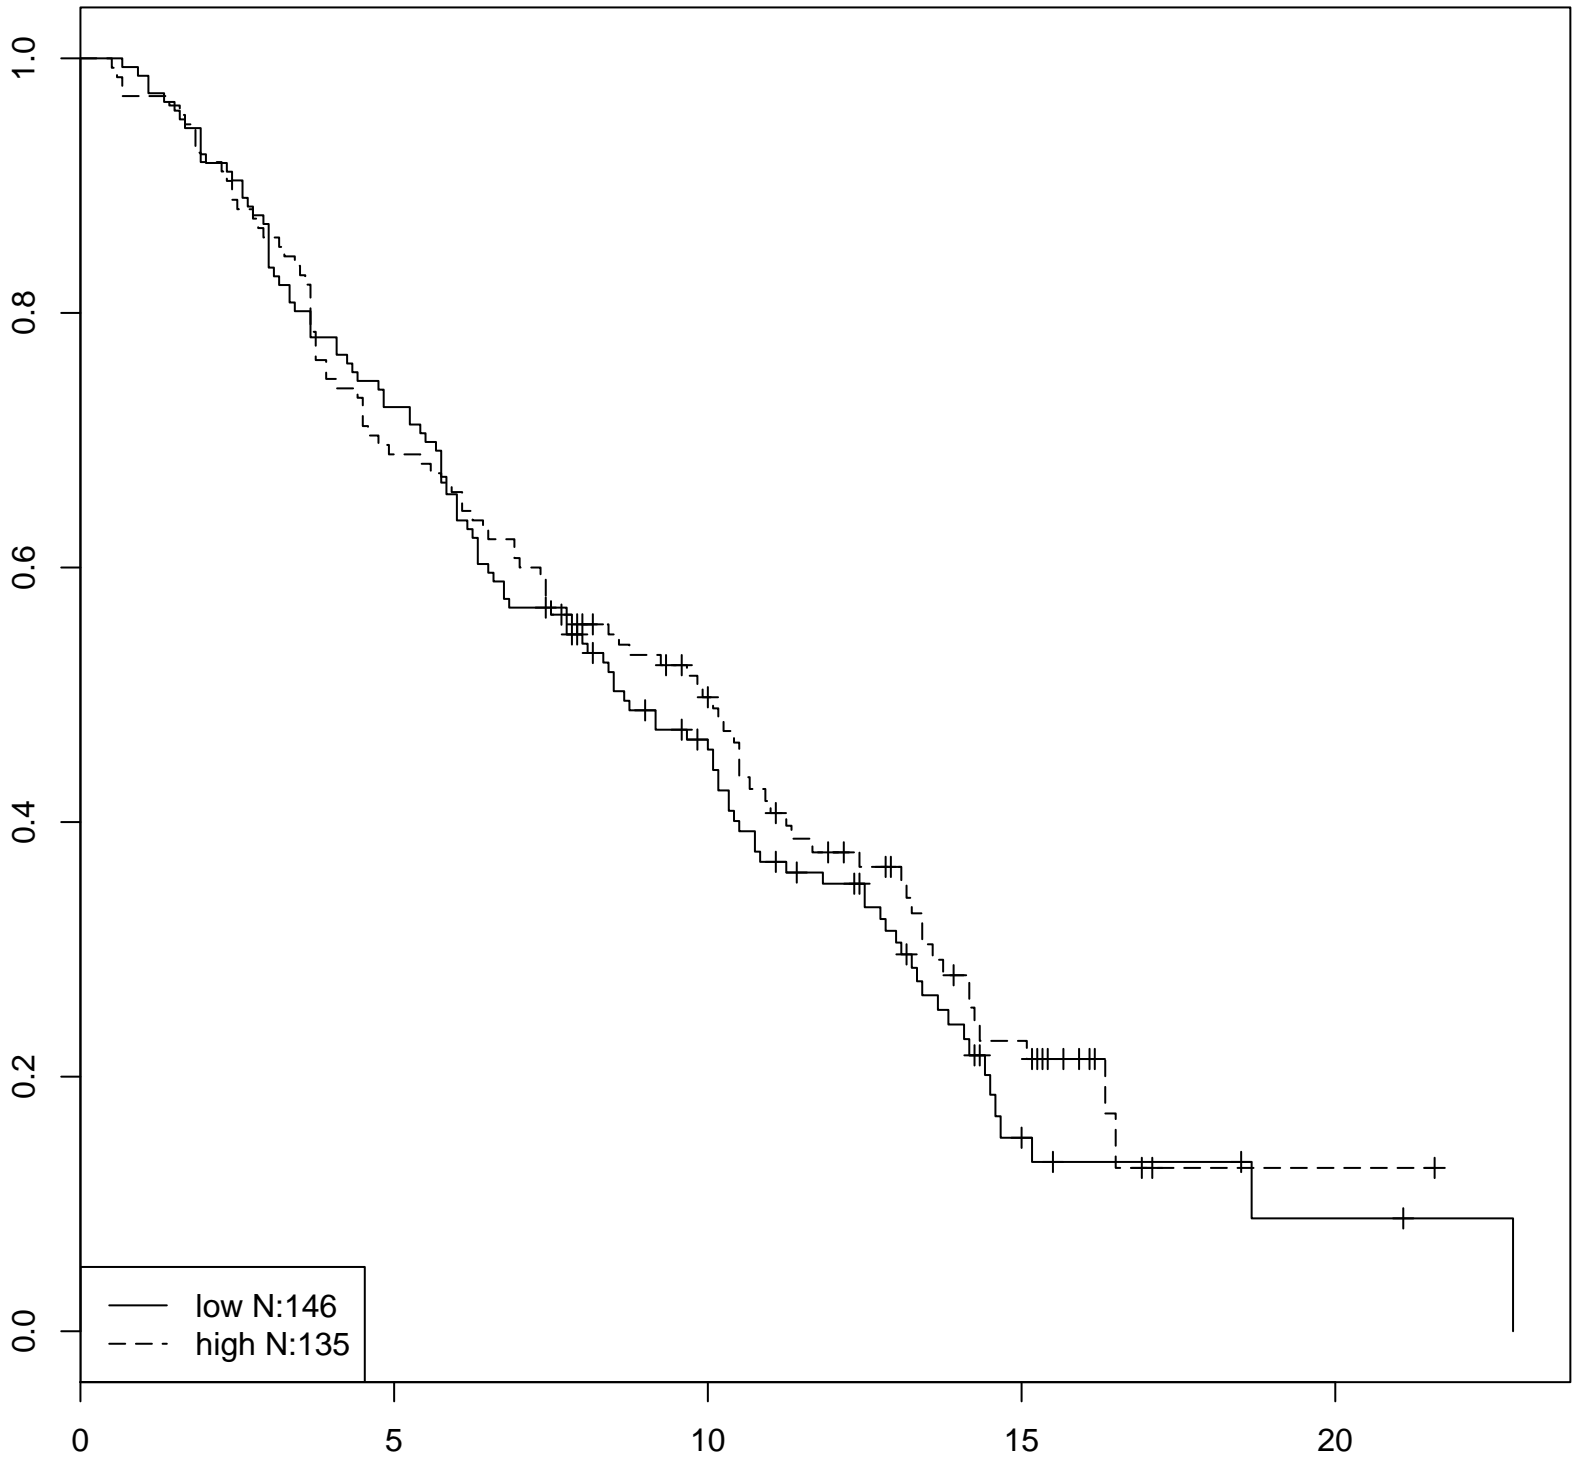

years

log-rank test p-value = 0.442

# Survival by SERPINF2 expression

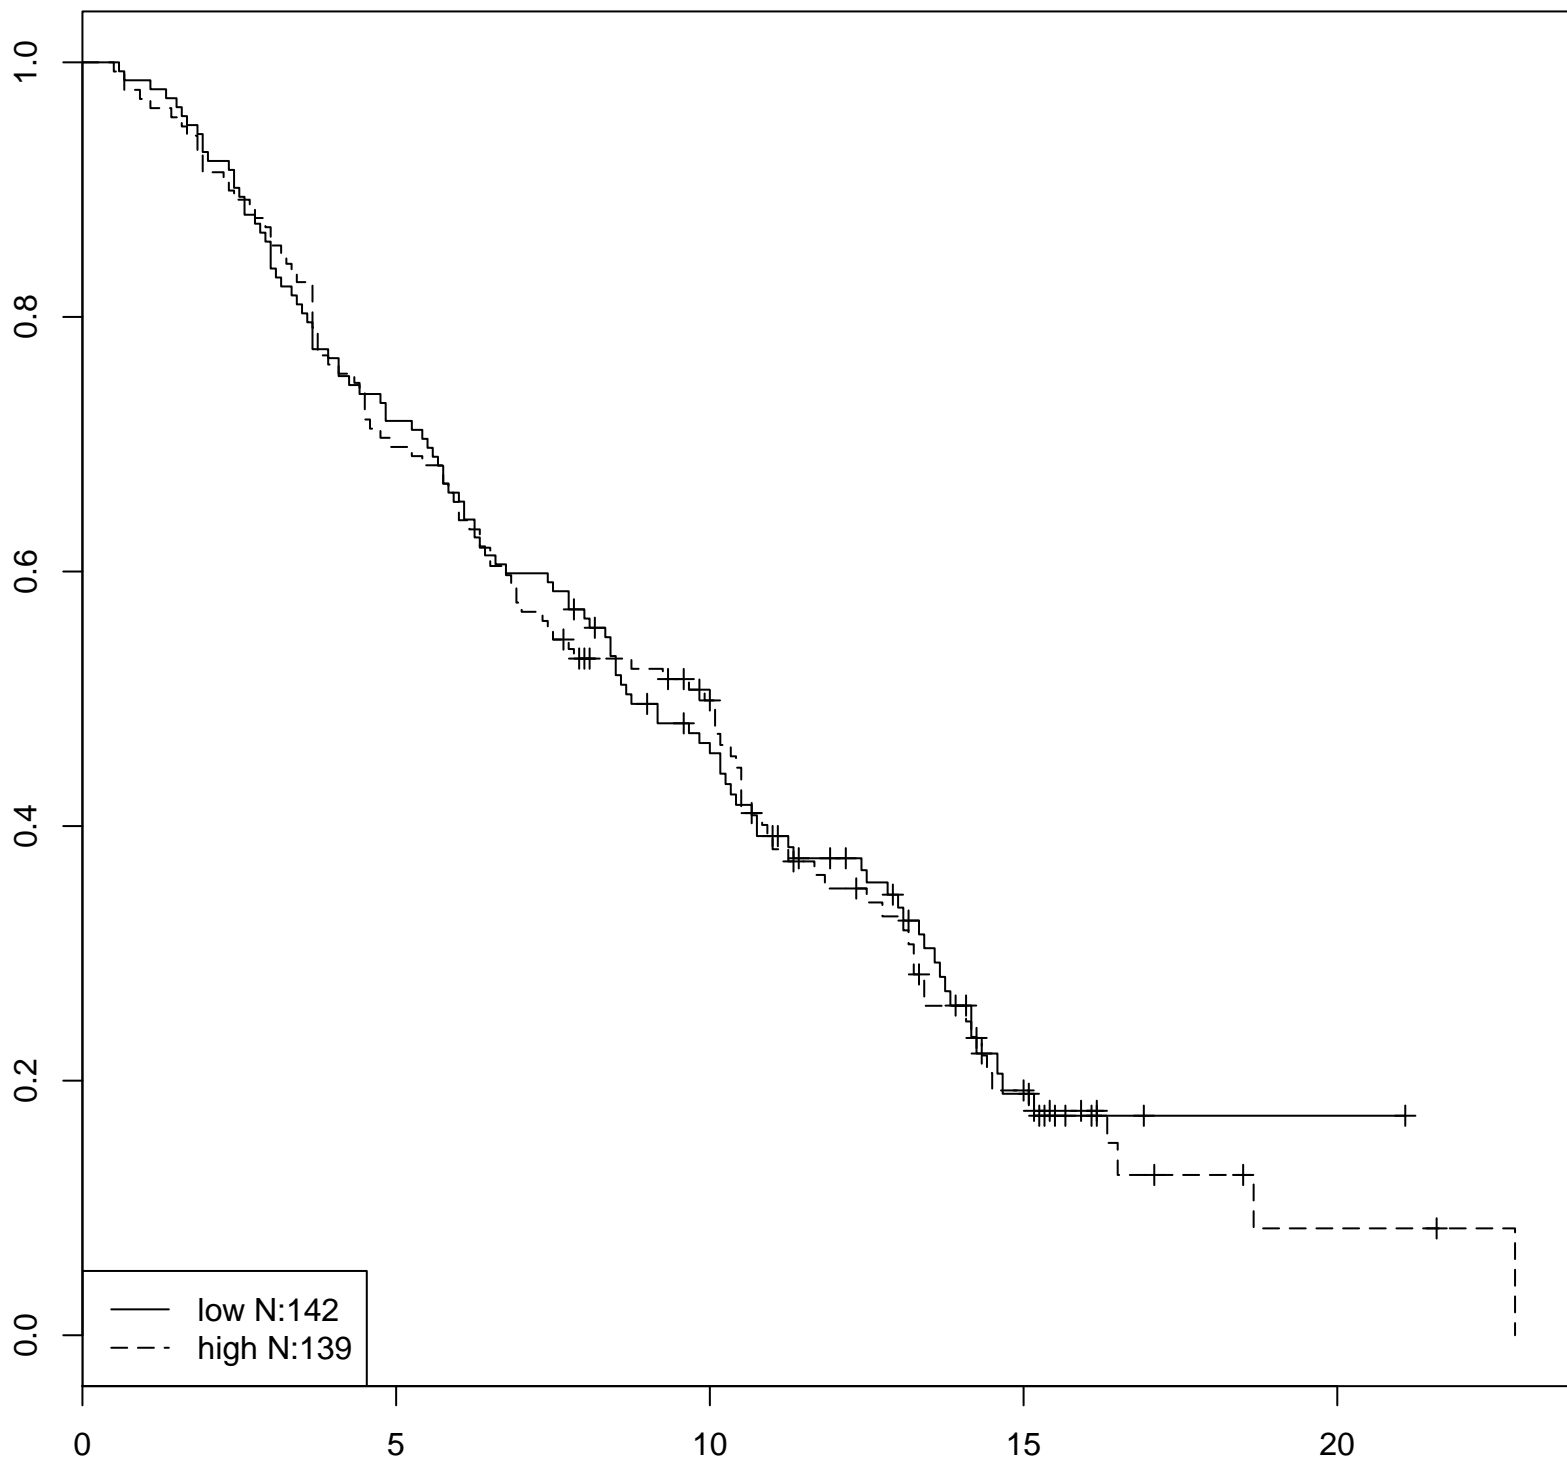



# Survival by SHBG expression

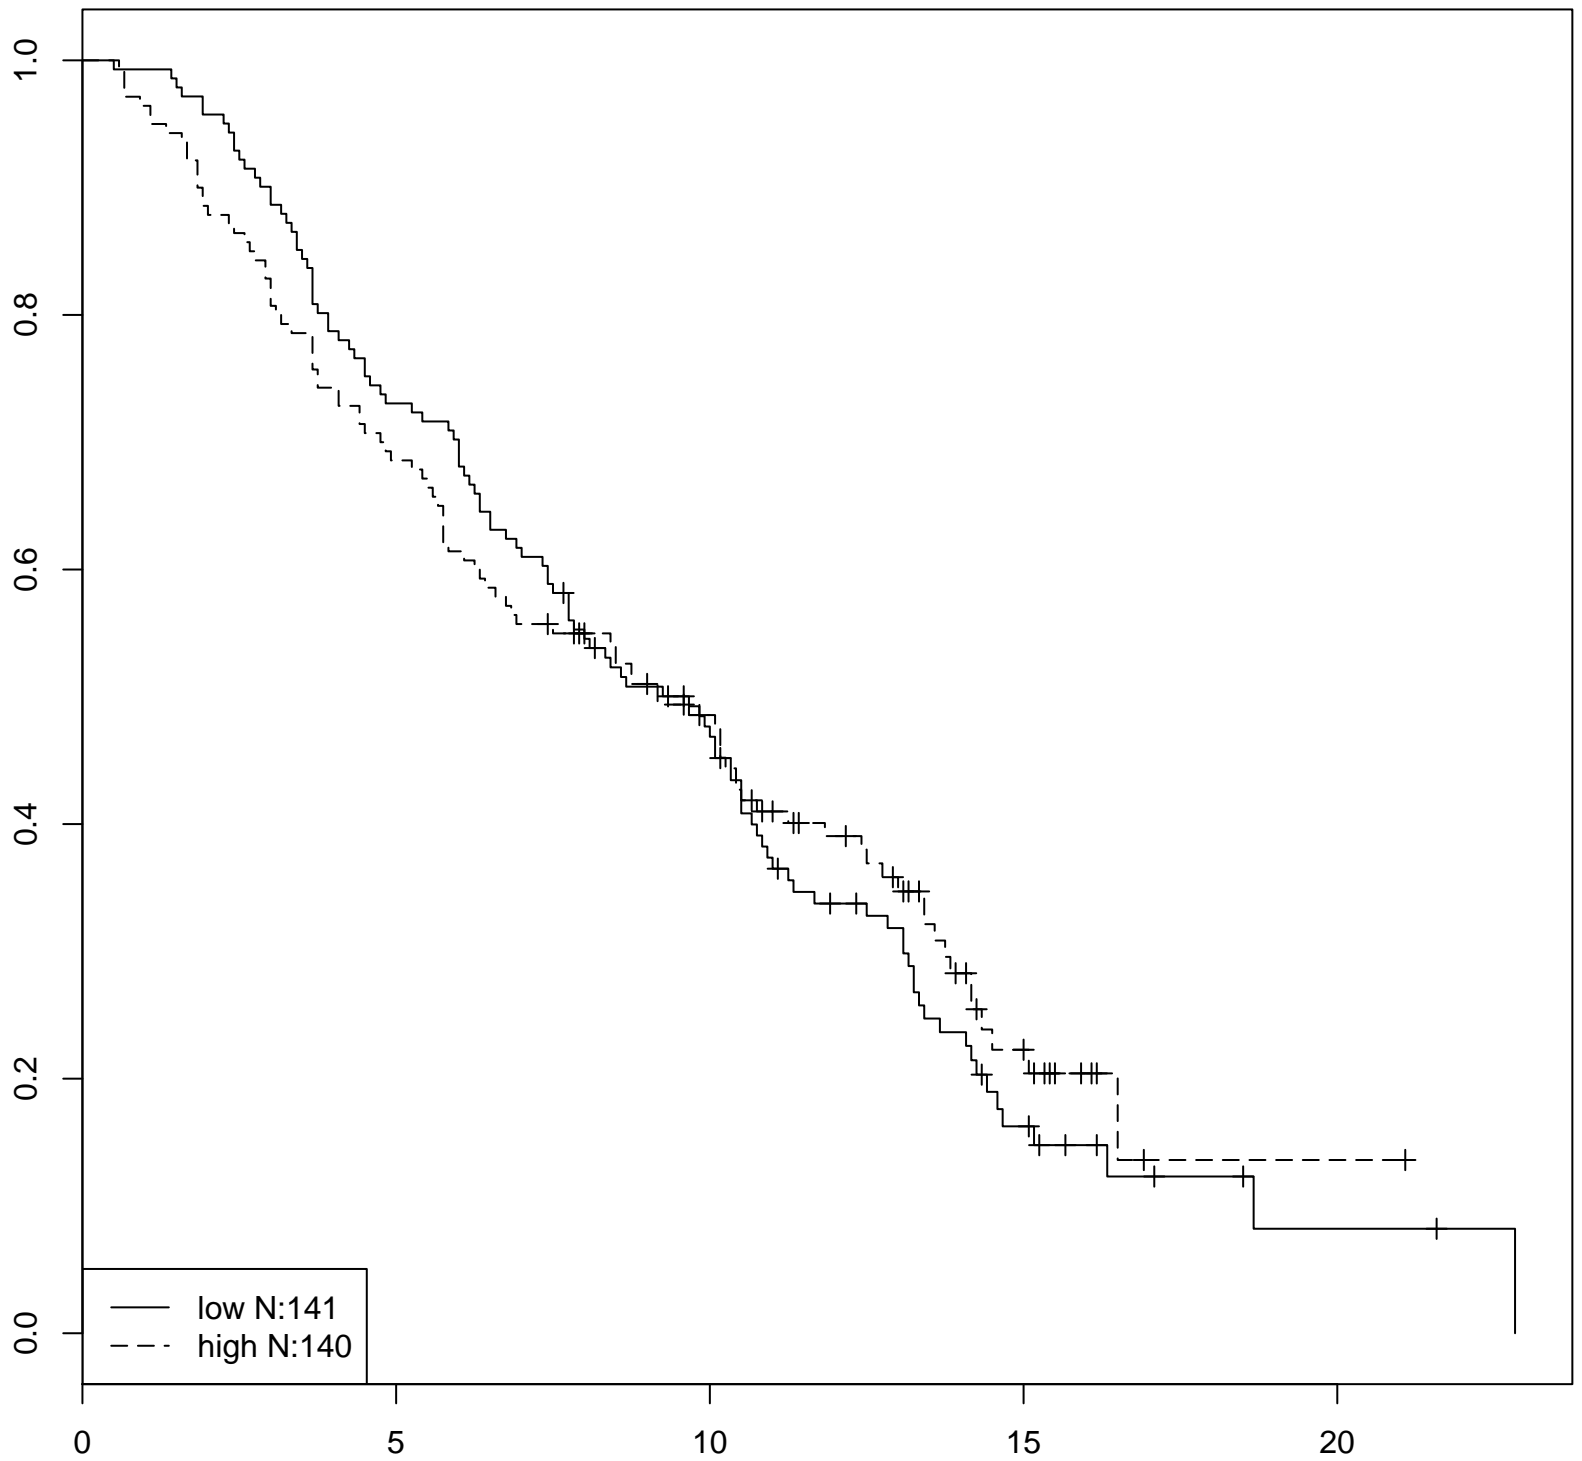

# Survival by SHC1 expression

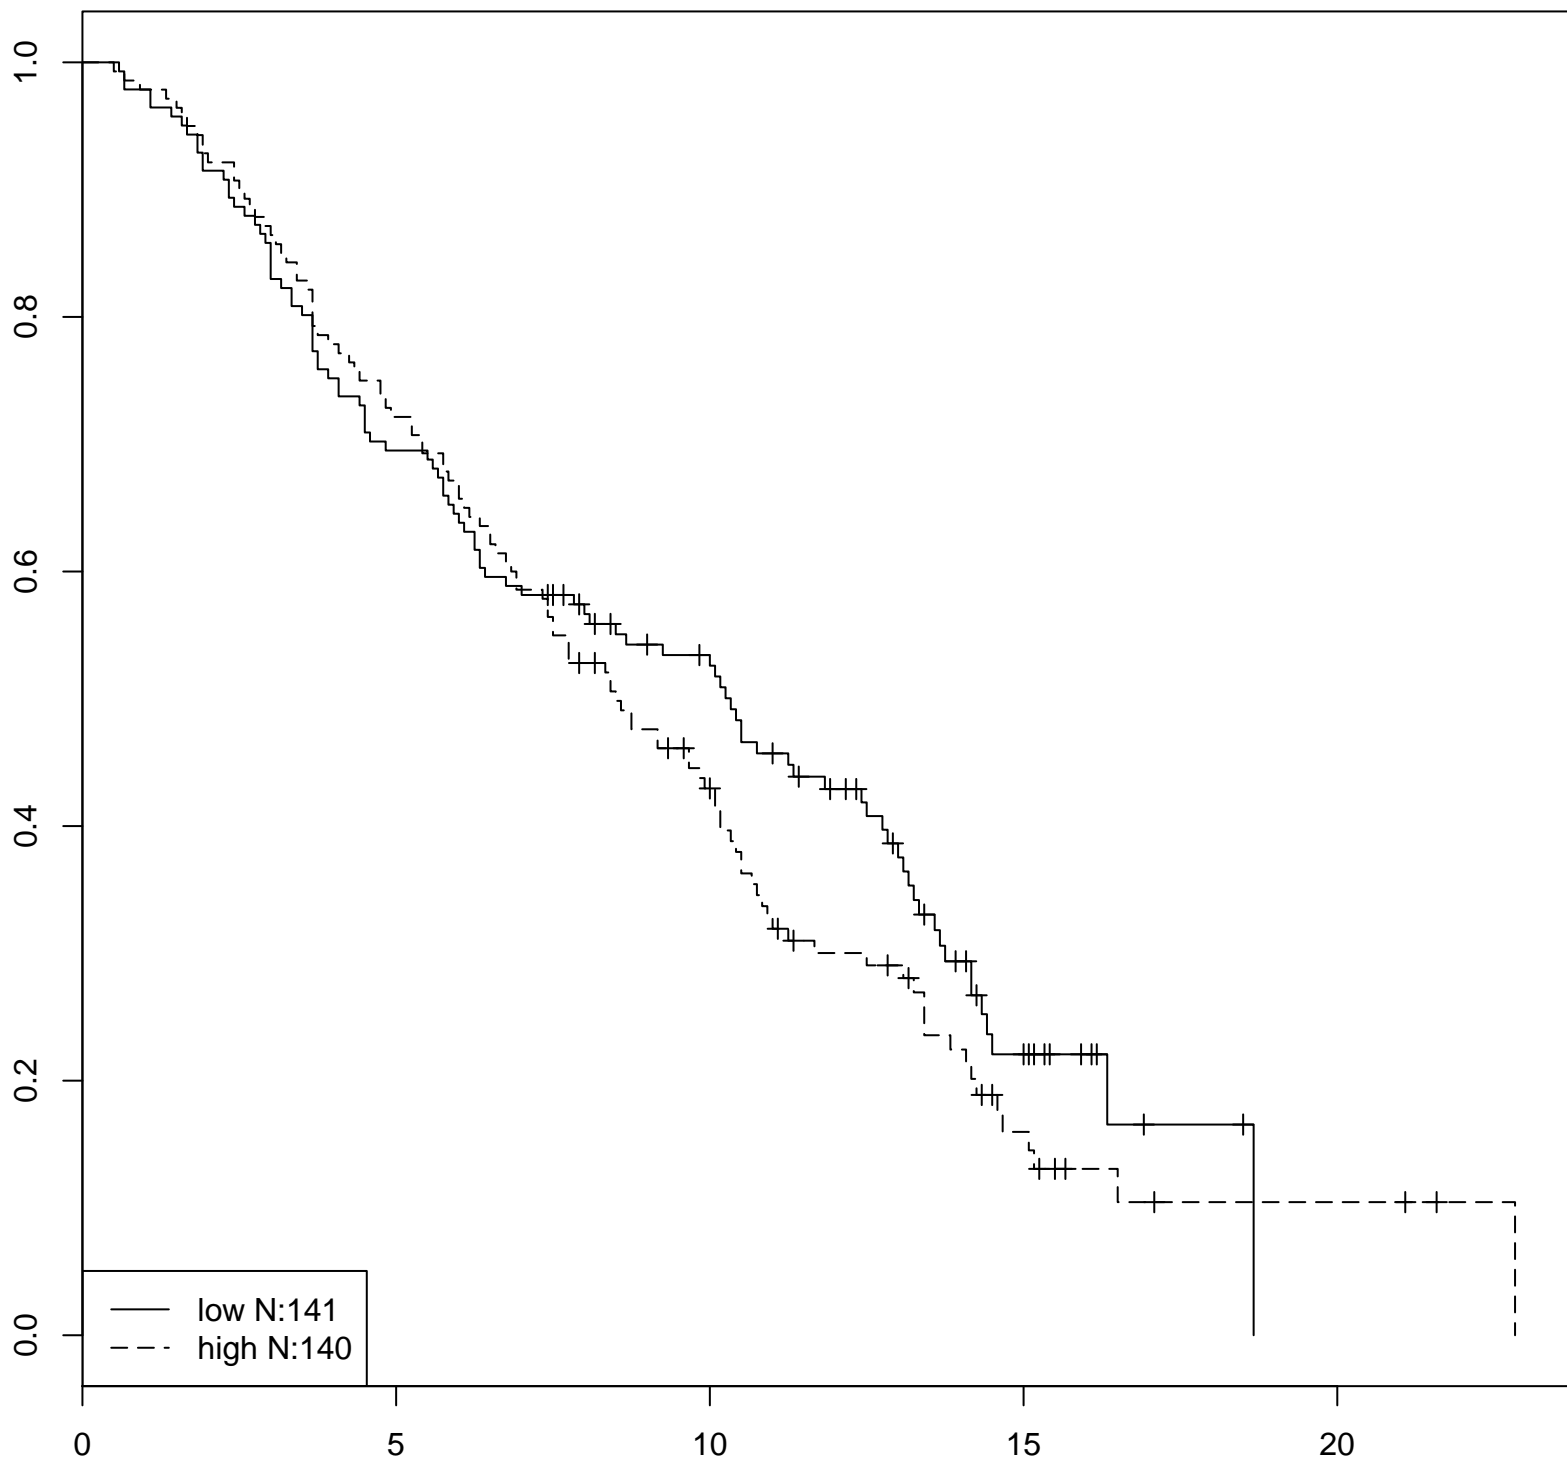

# Survival by SIM2 expression

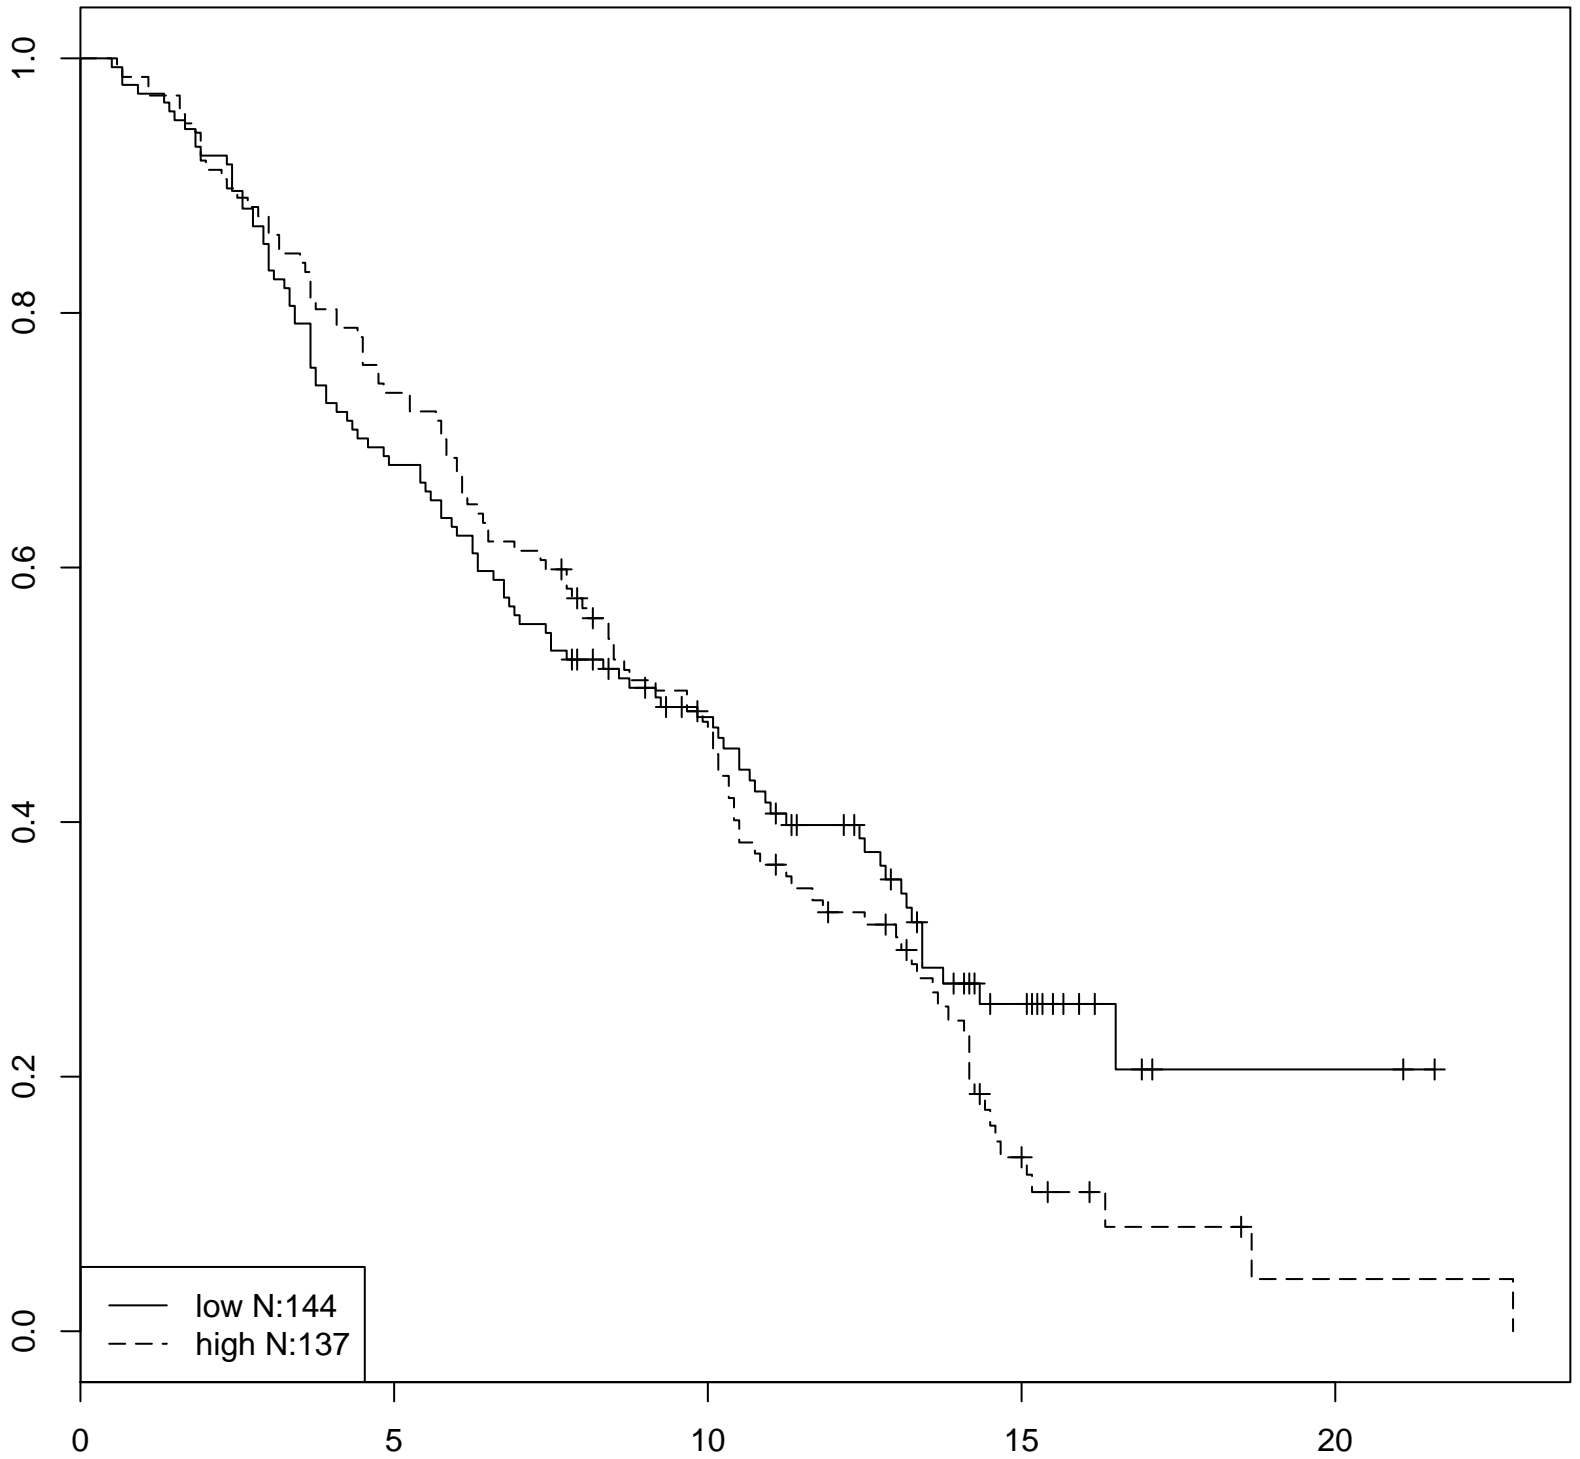

years

log-rank test p-value = 0.316

# Survival by SLC2A1 expression

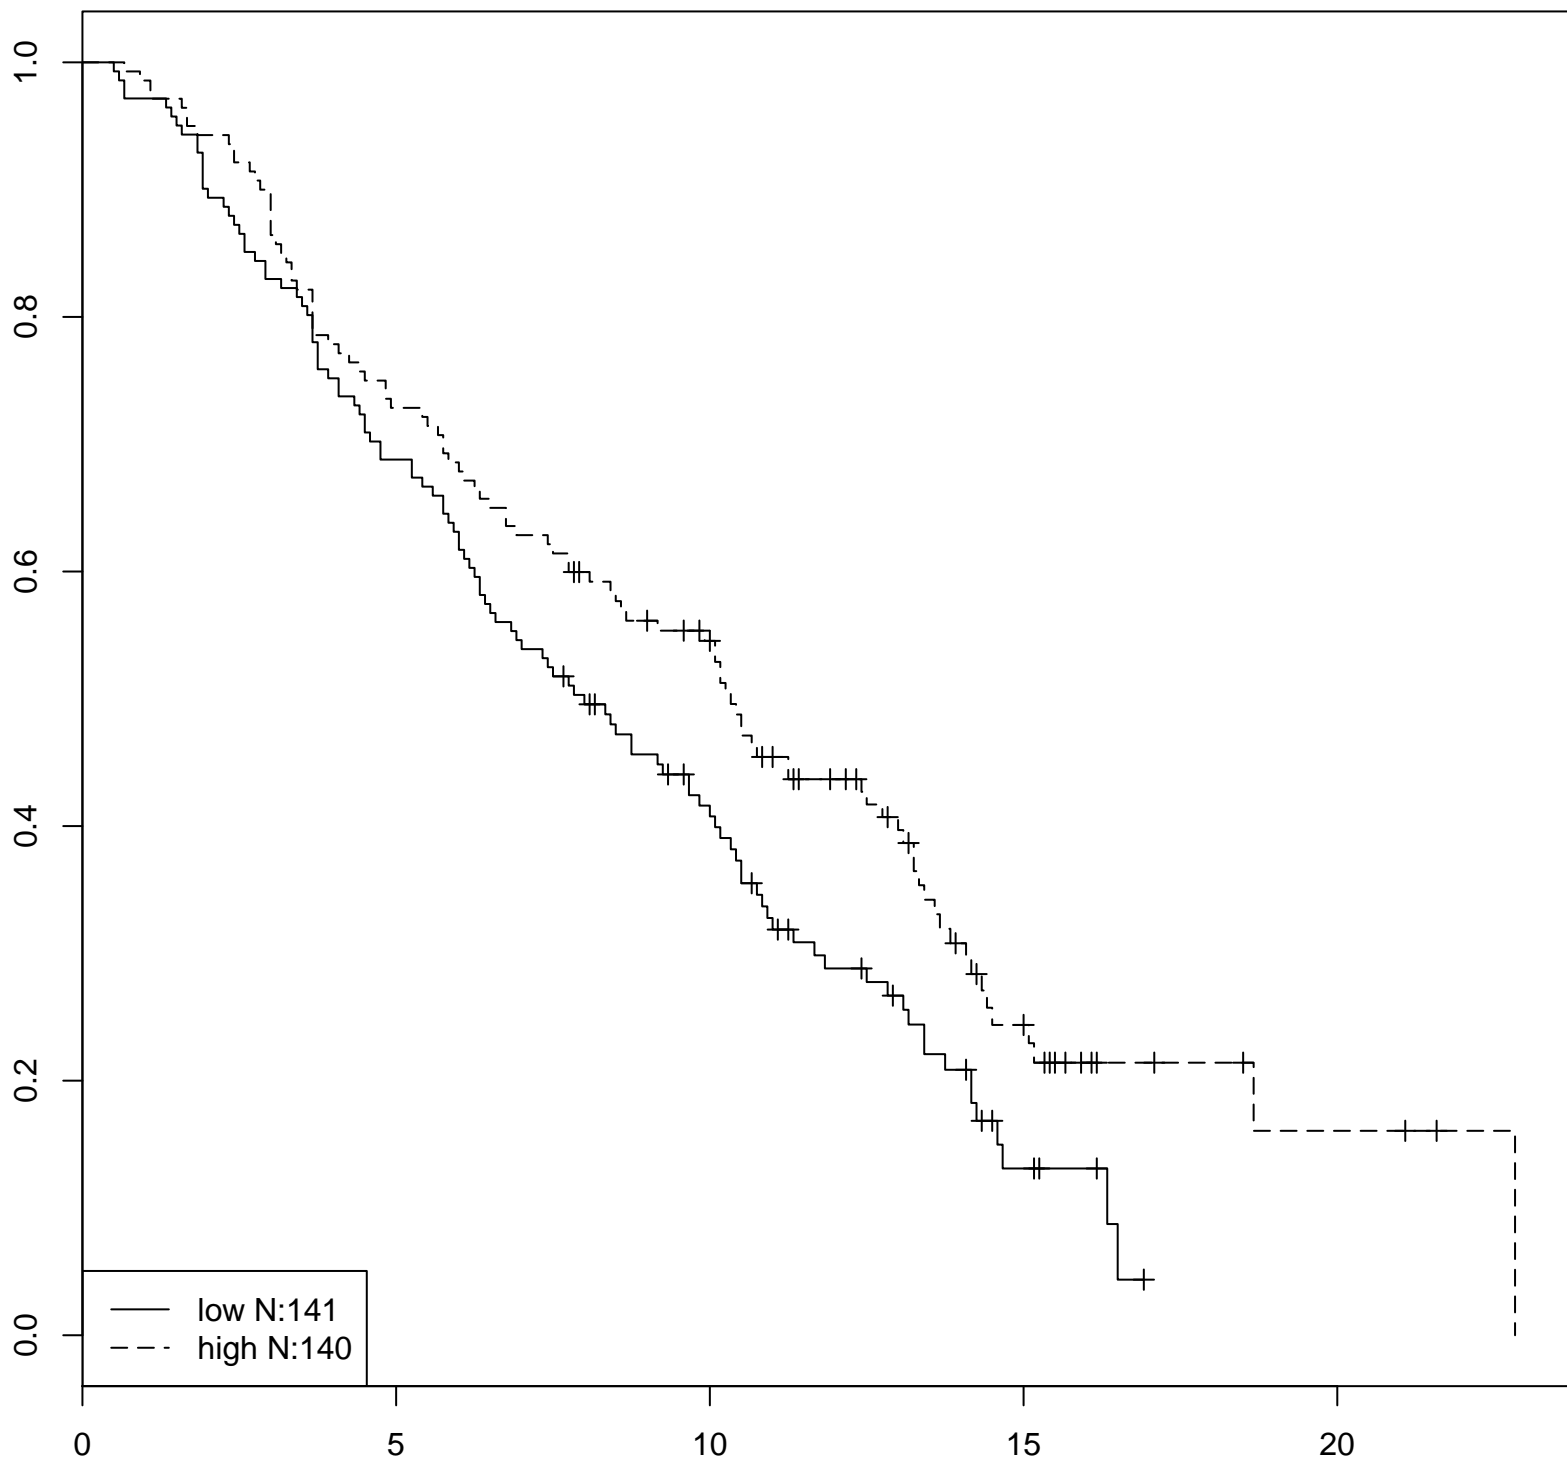

years

log-rank test p-value = 0.019

# Survival by SMAD2 expression

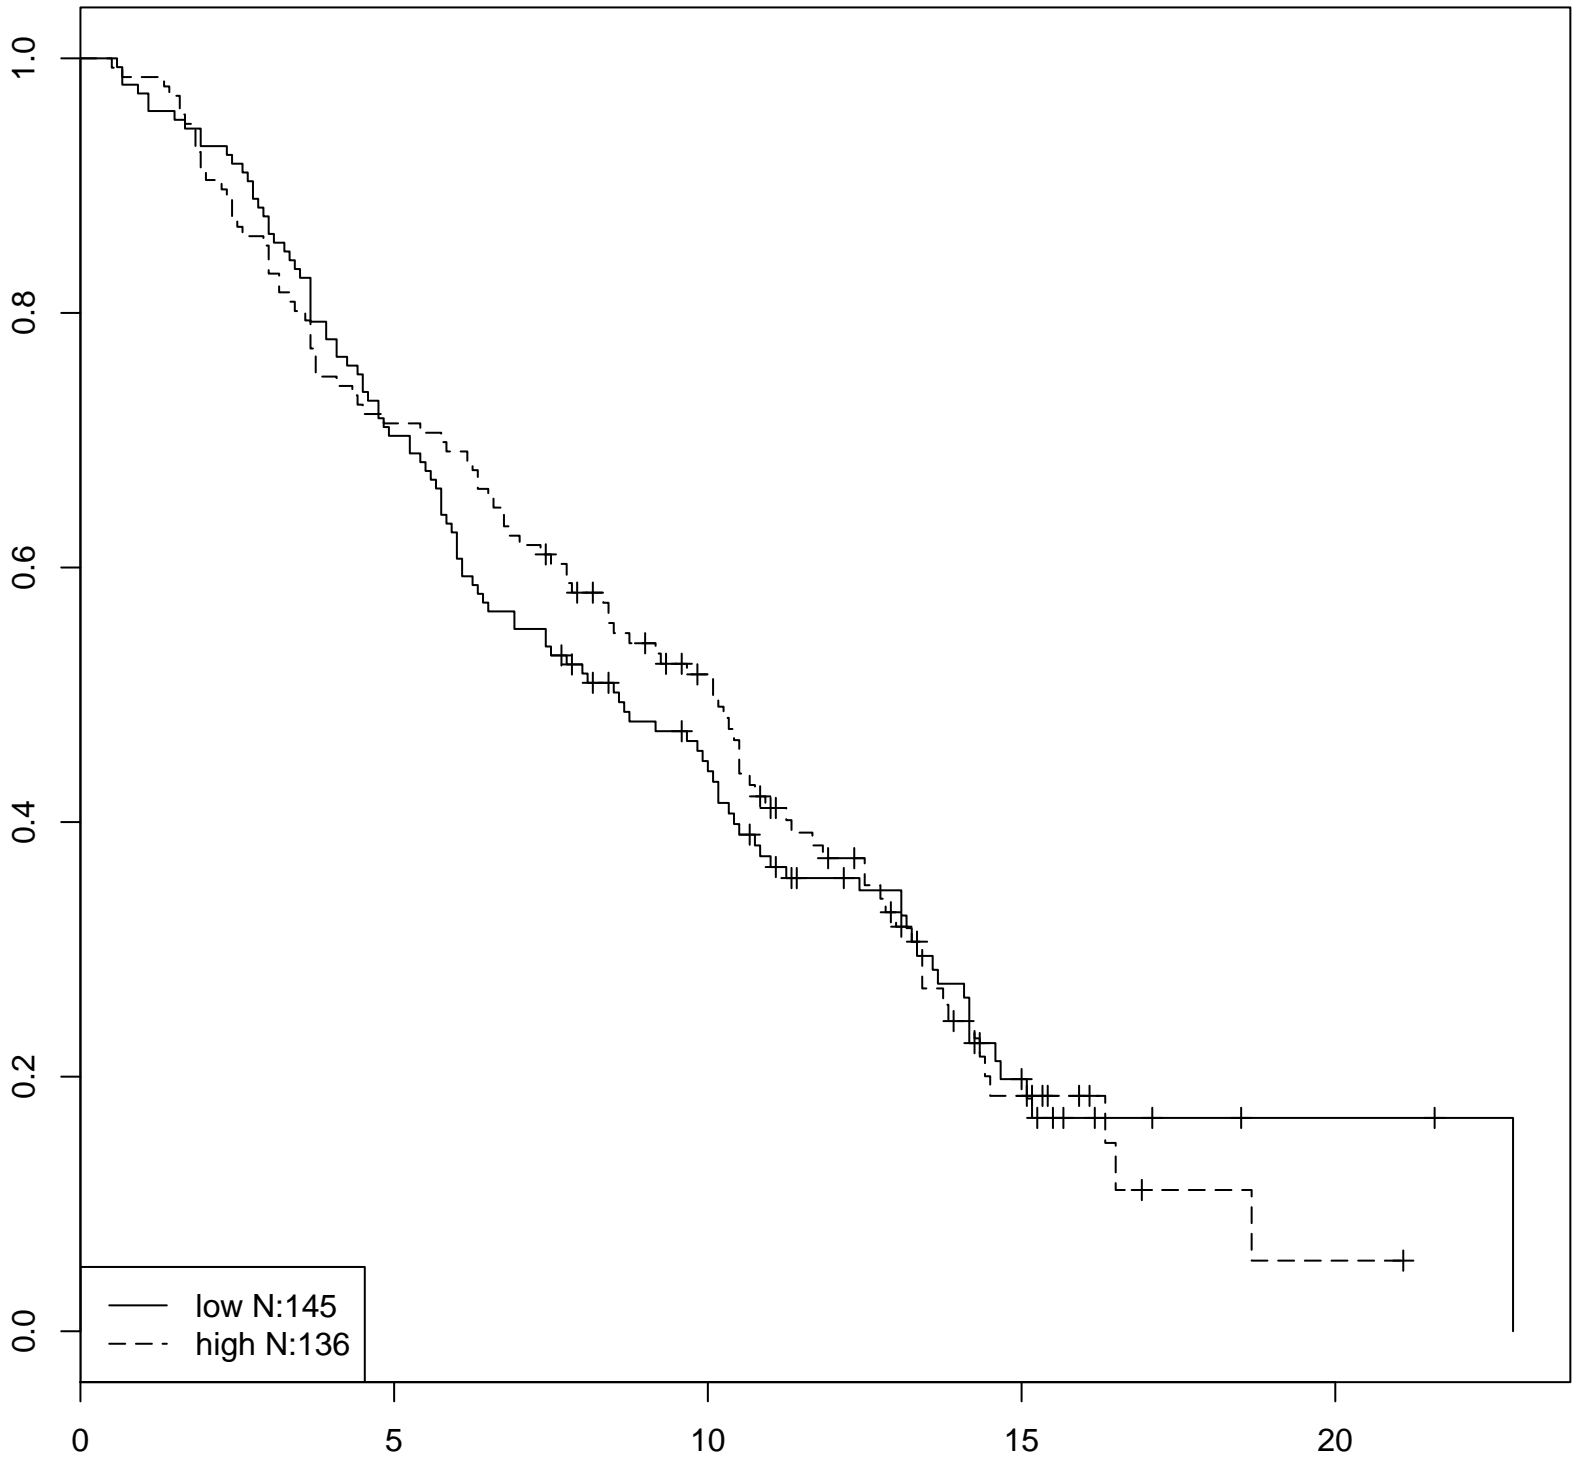

years

log-rank test p-value = 0.805

# Survival by SMAD3 expression

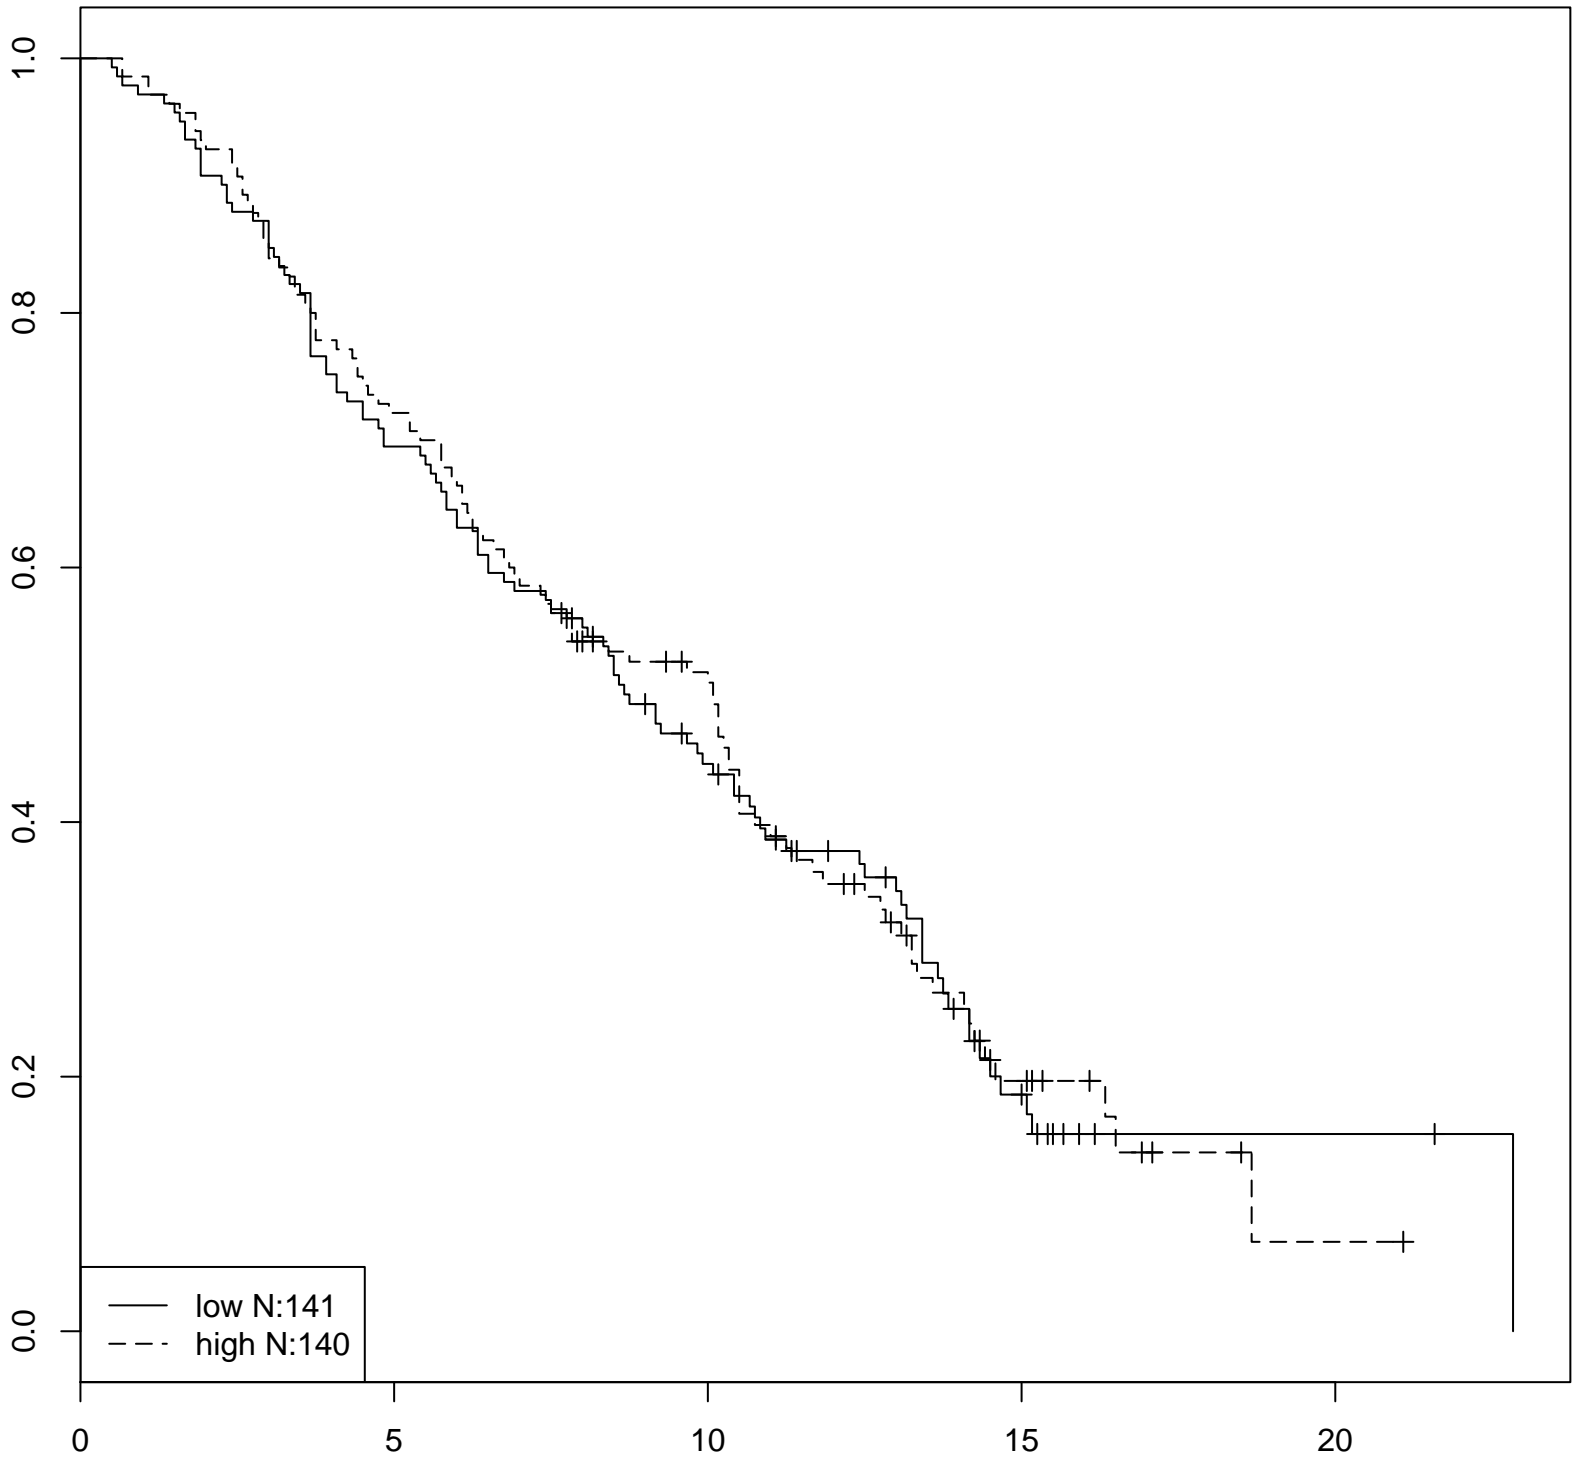

years

log-rank test p-value = 0.863

# Survival by SMAD4 expression

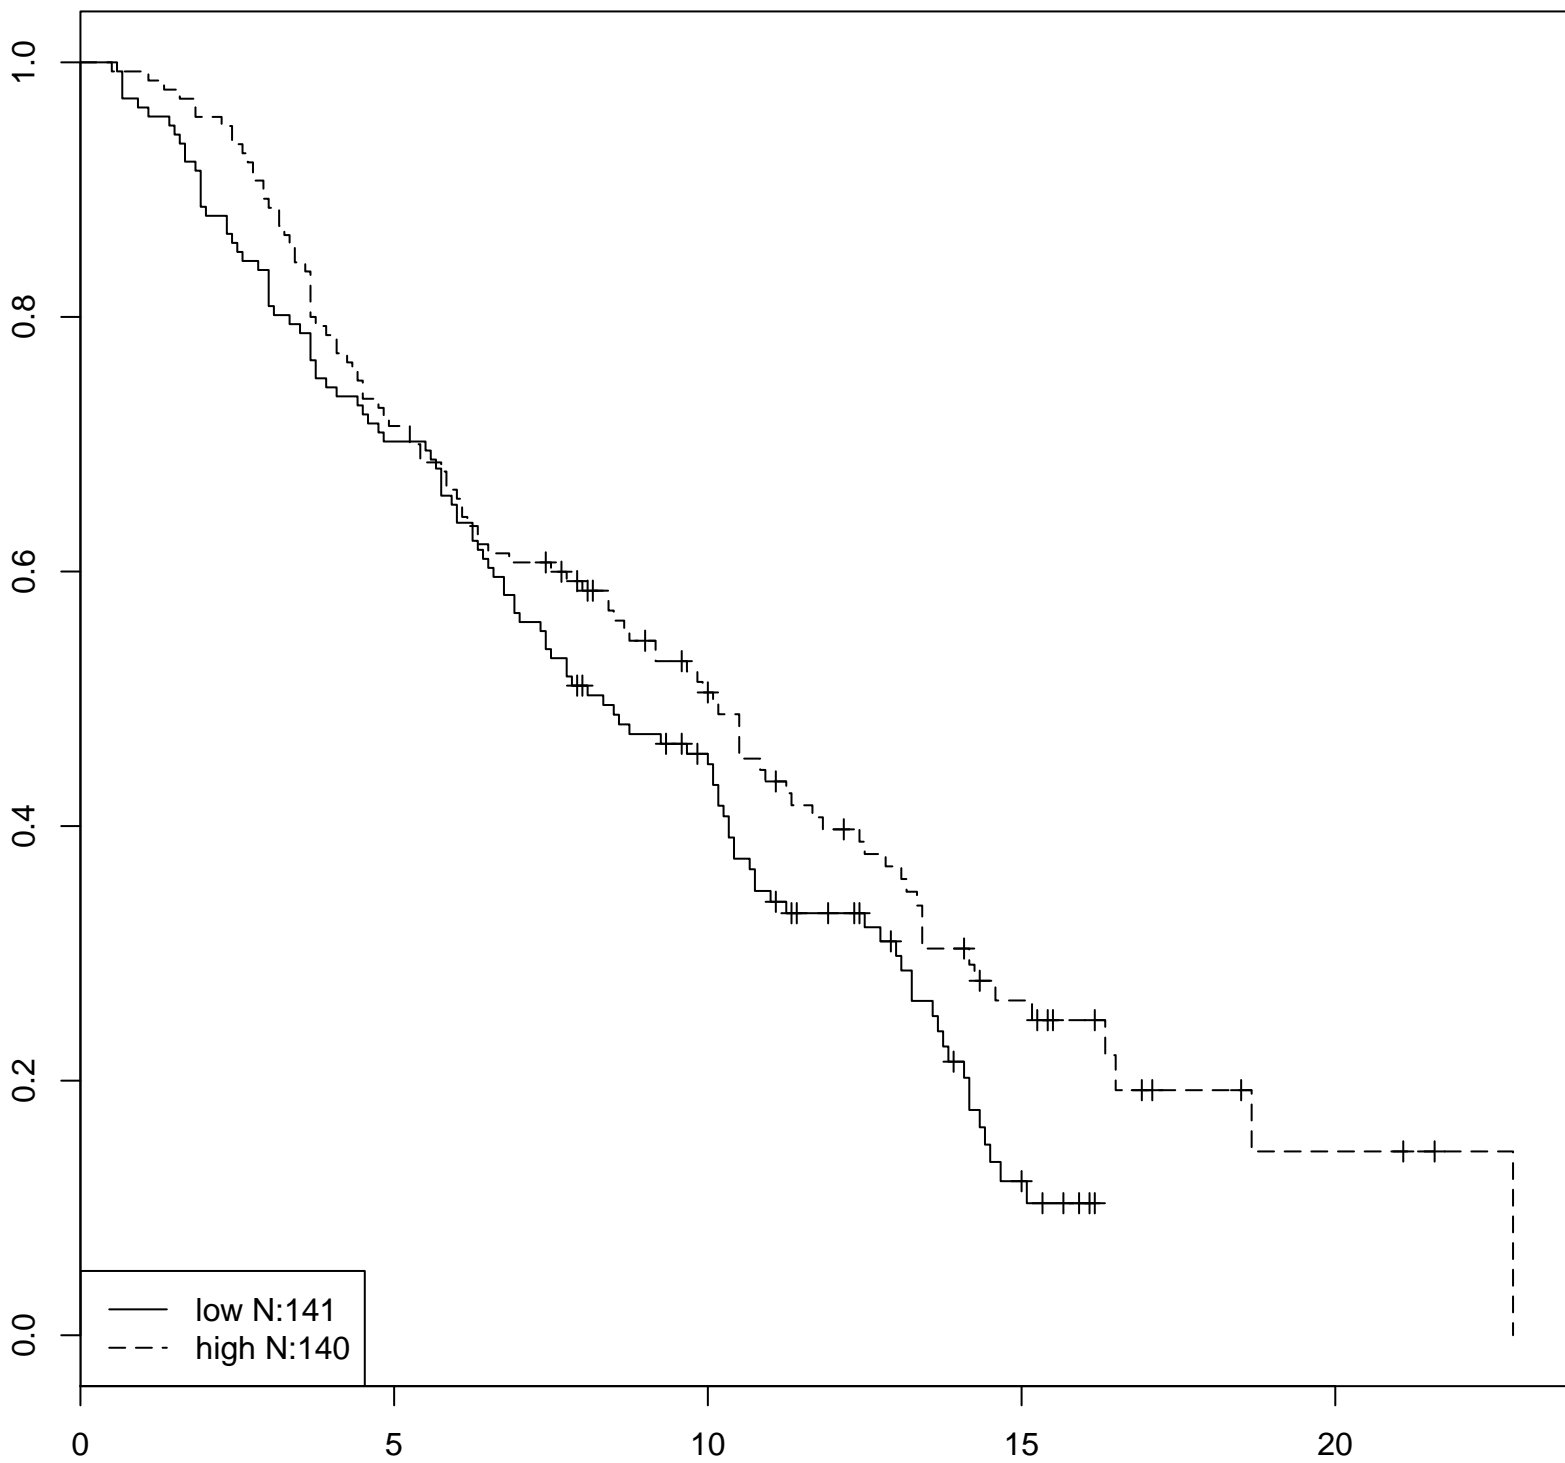

years

log-rank test p-value = 0.048

# Survival by SMARCC1 expression

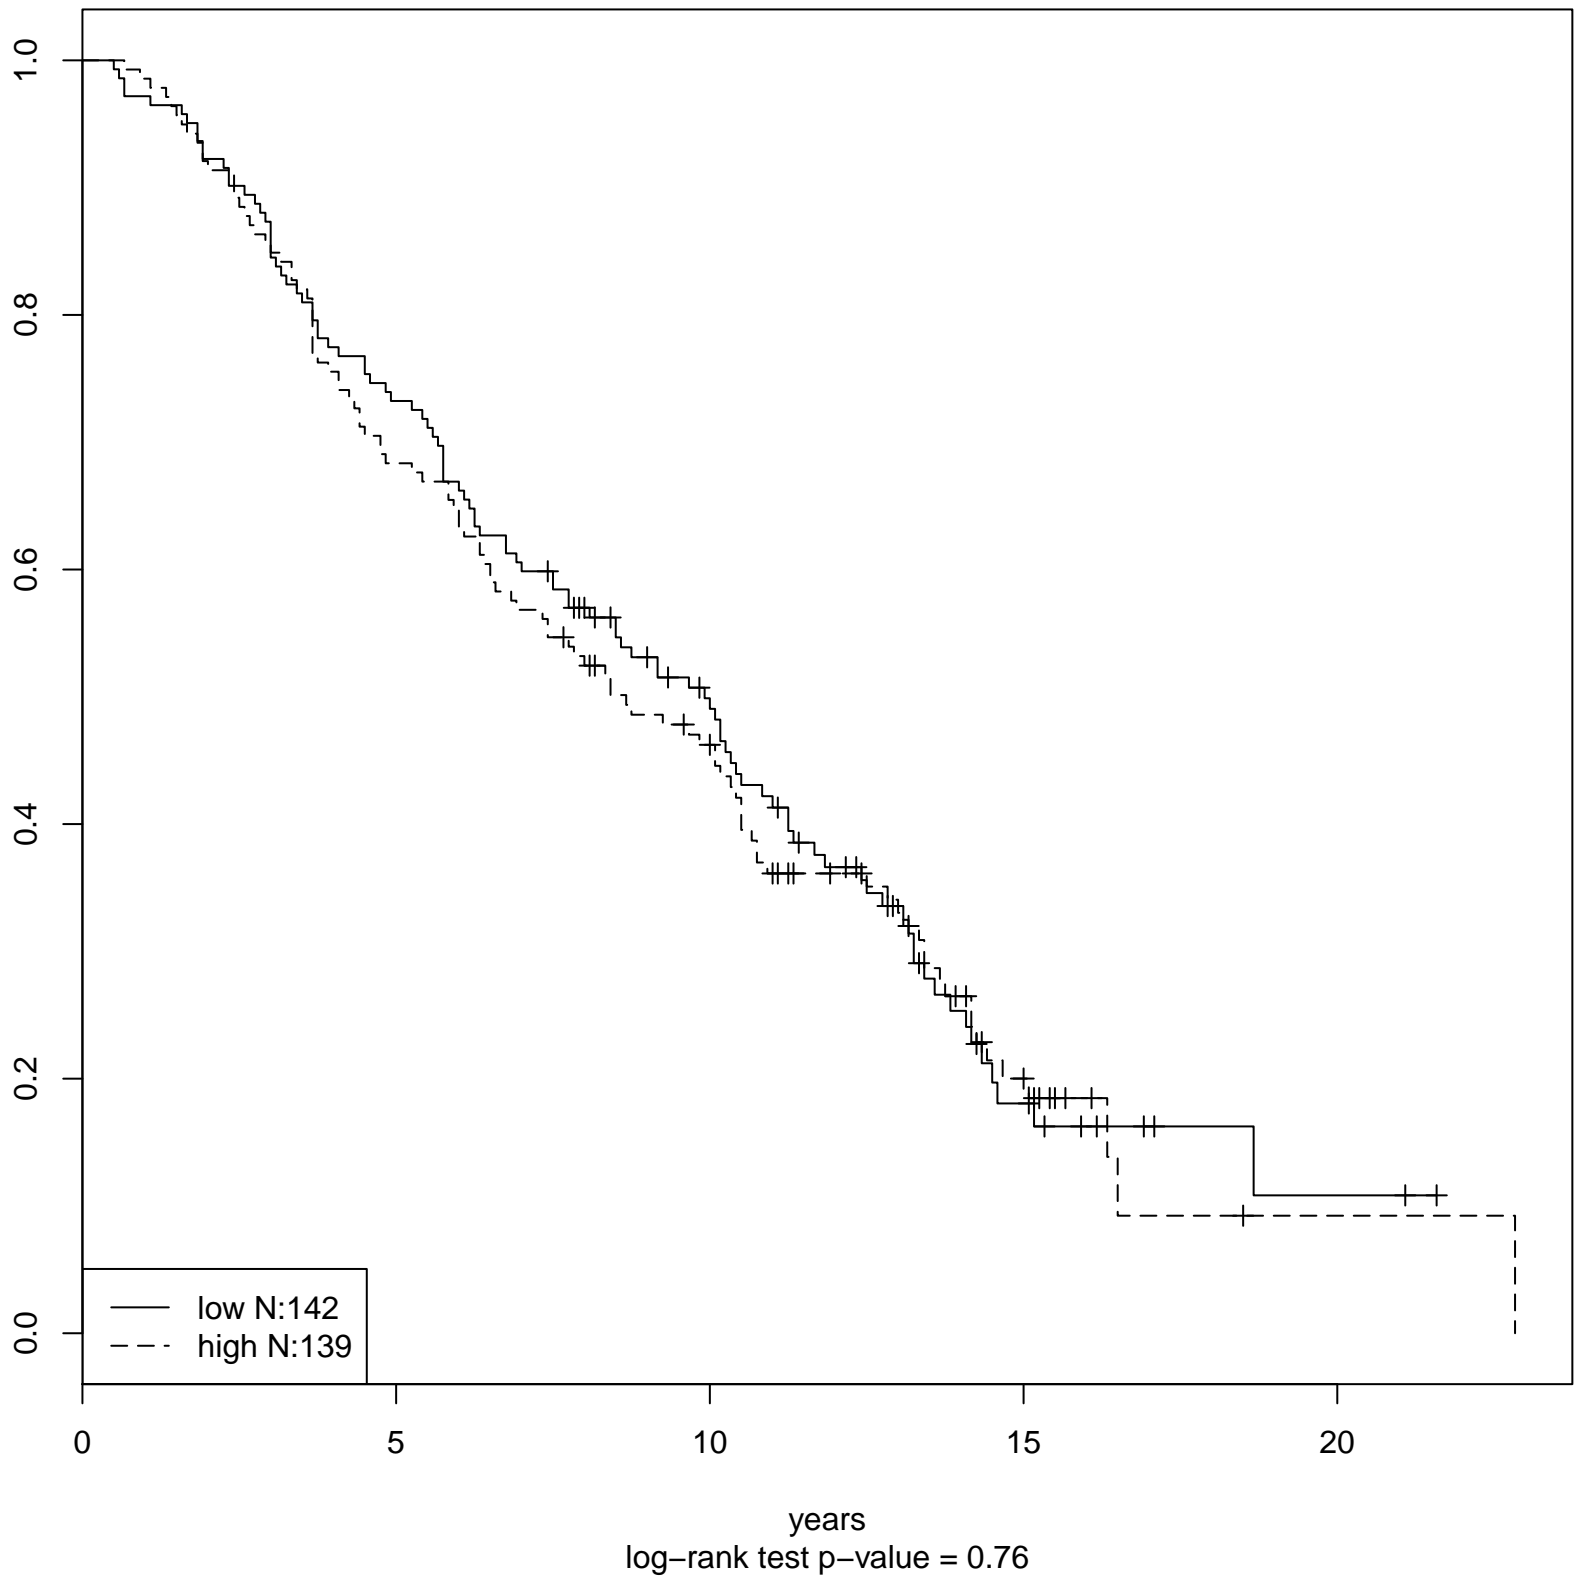



# Survival by SMURF2 expression

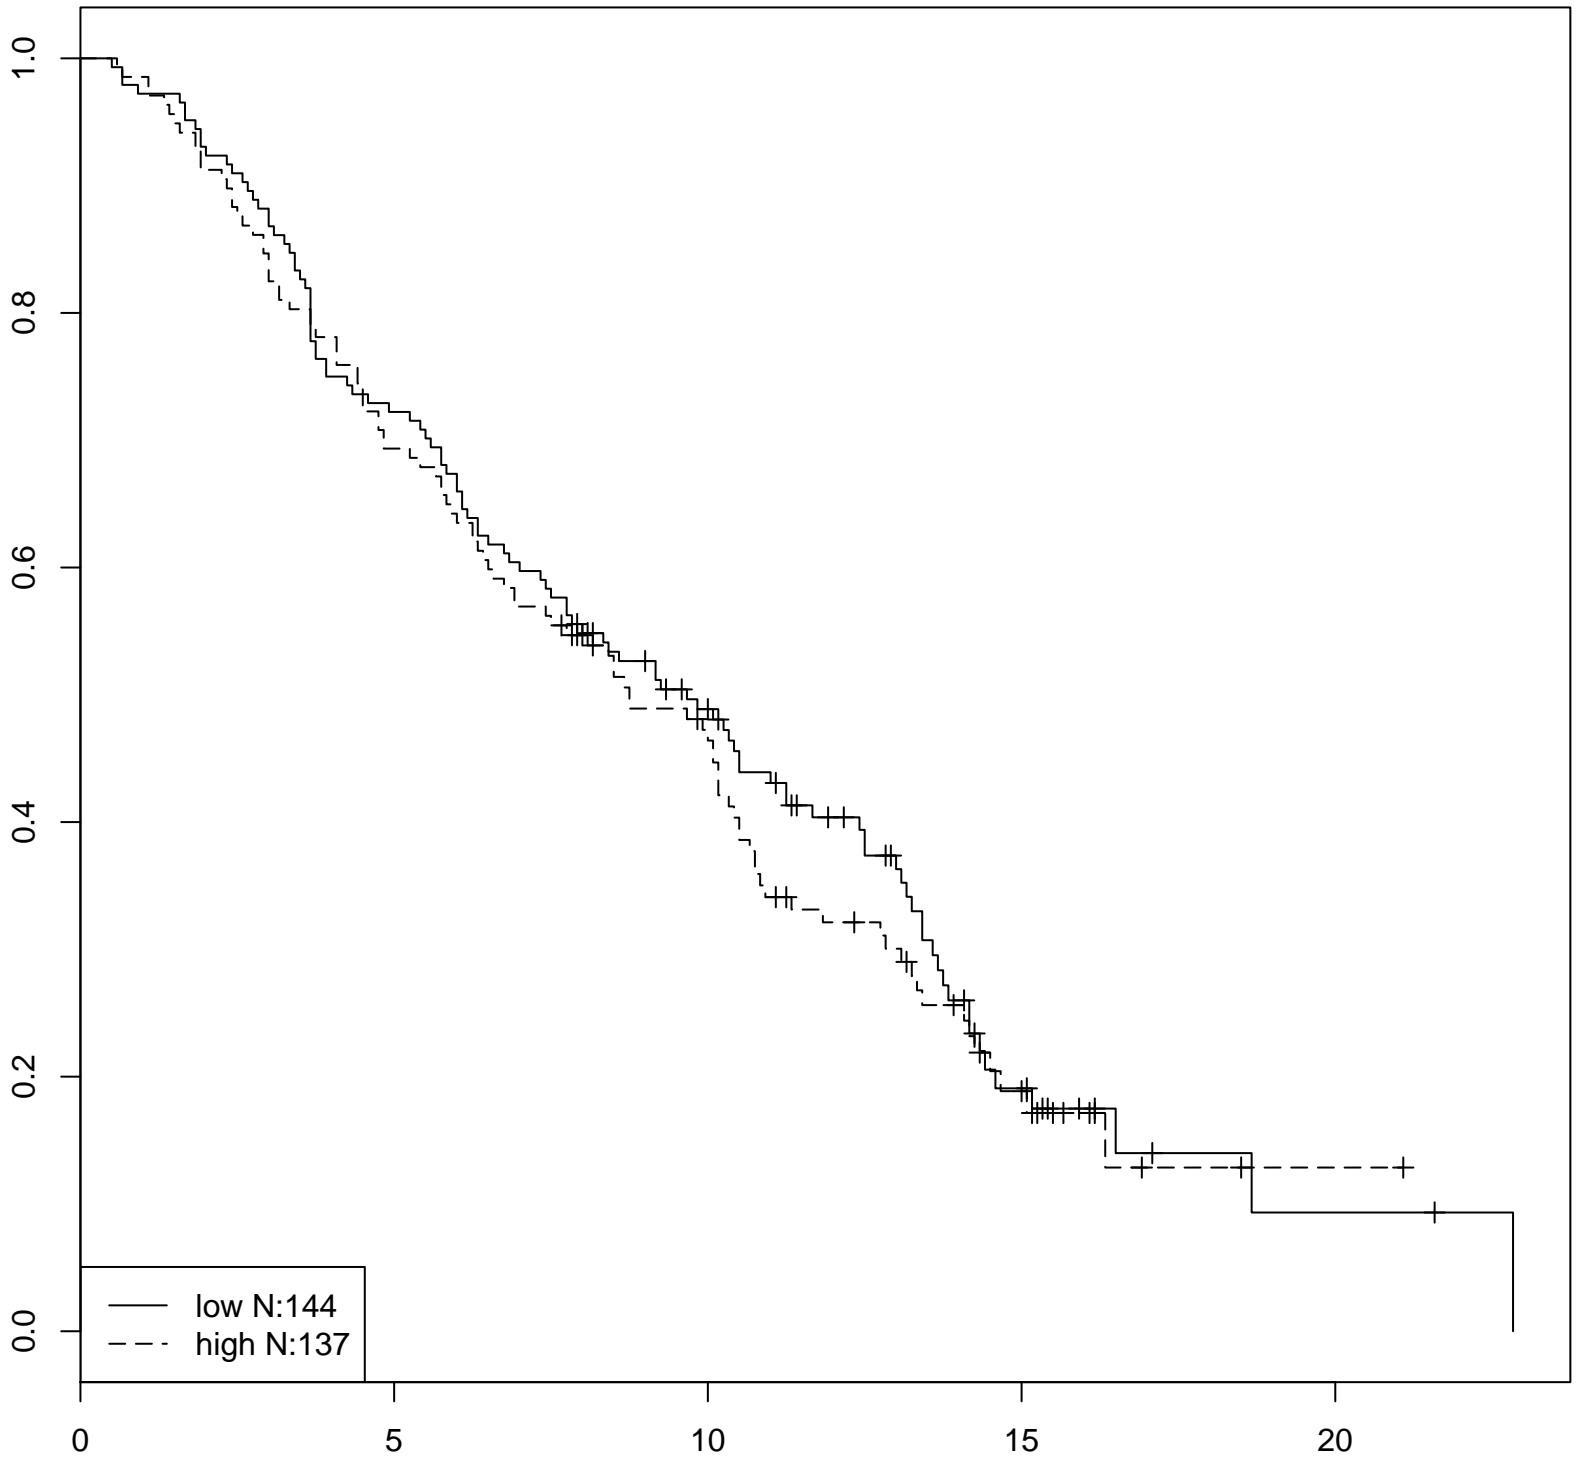

years

log-rank test p-value = 0.561

# Survival by SNAI2 expression

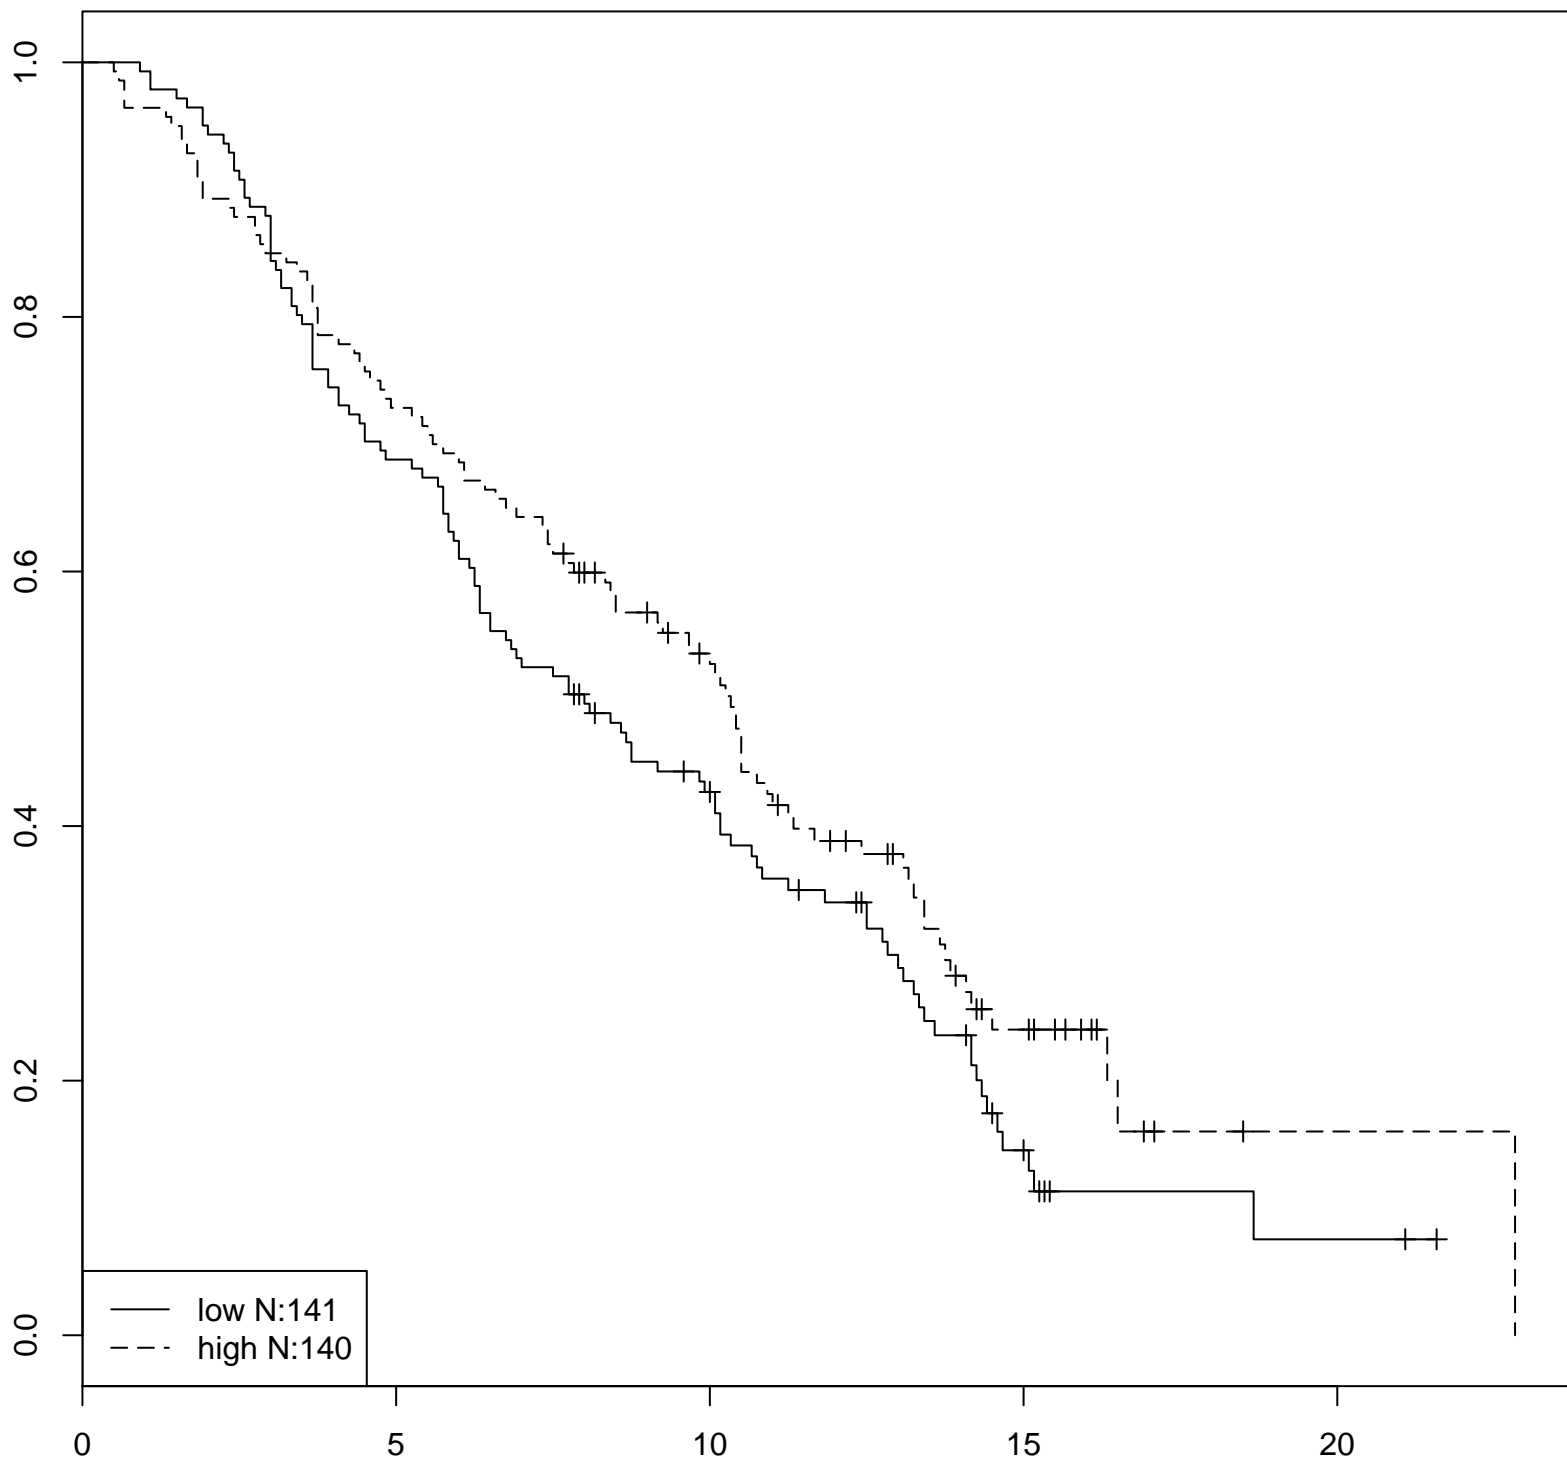

years

log-rank test p-value = 0.089

# Survival by SNCG expression

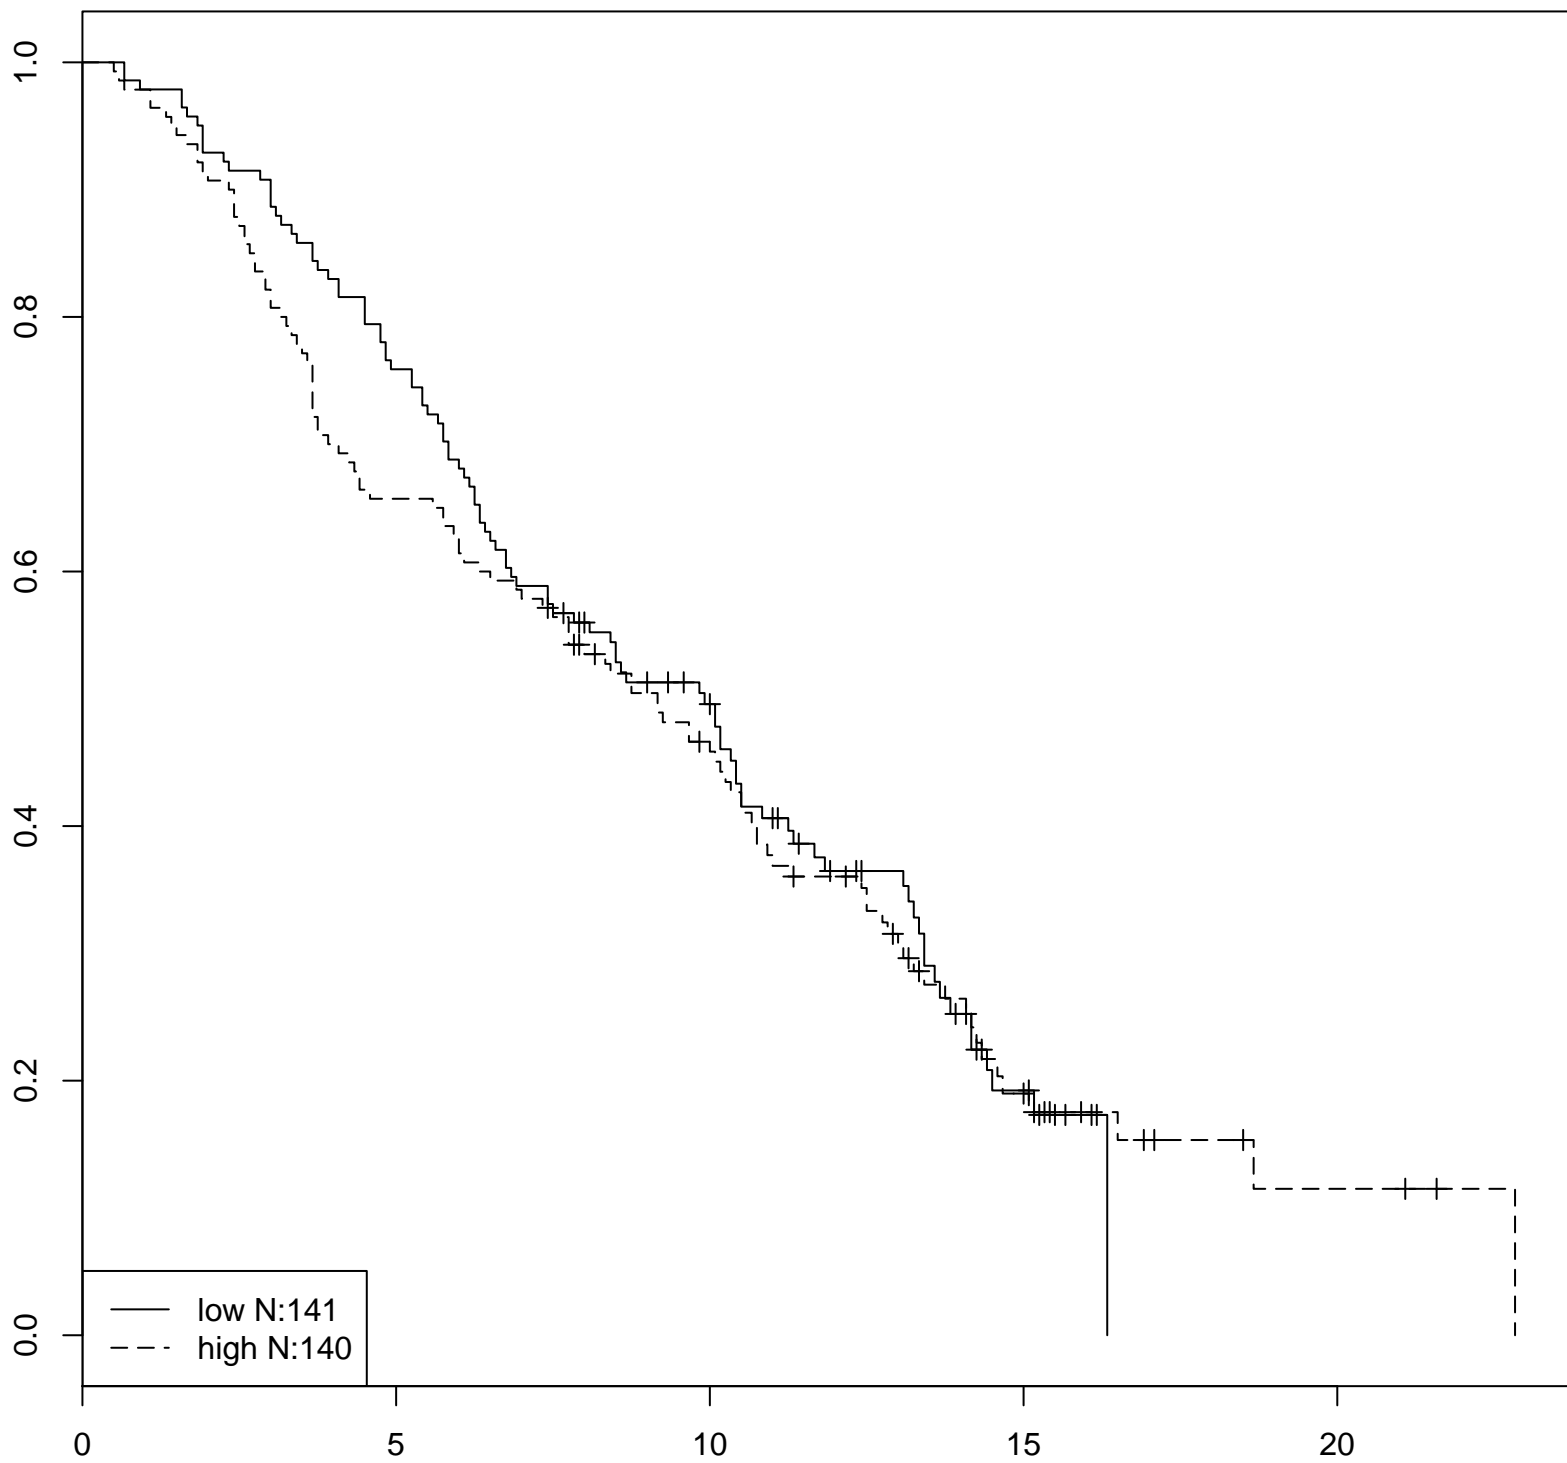

years  
log-rank test p-value = 0.653

# Survival by SND1 expression

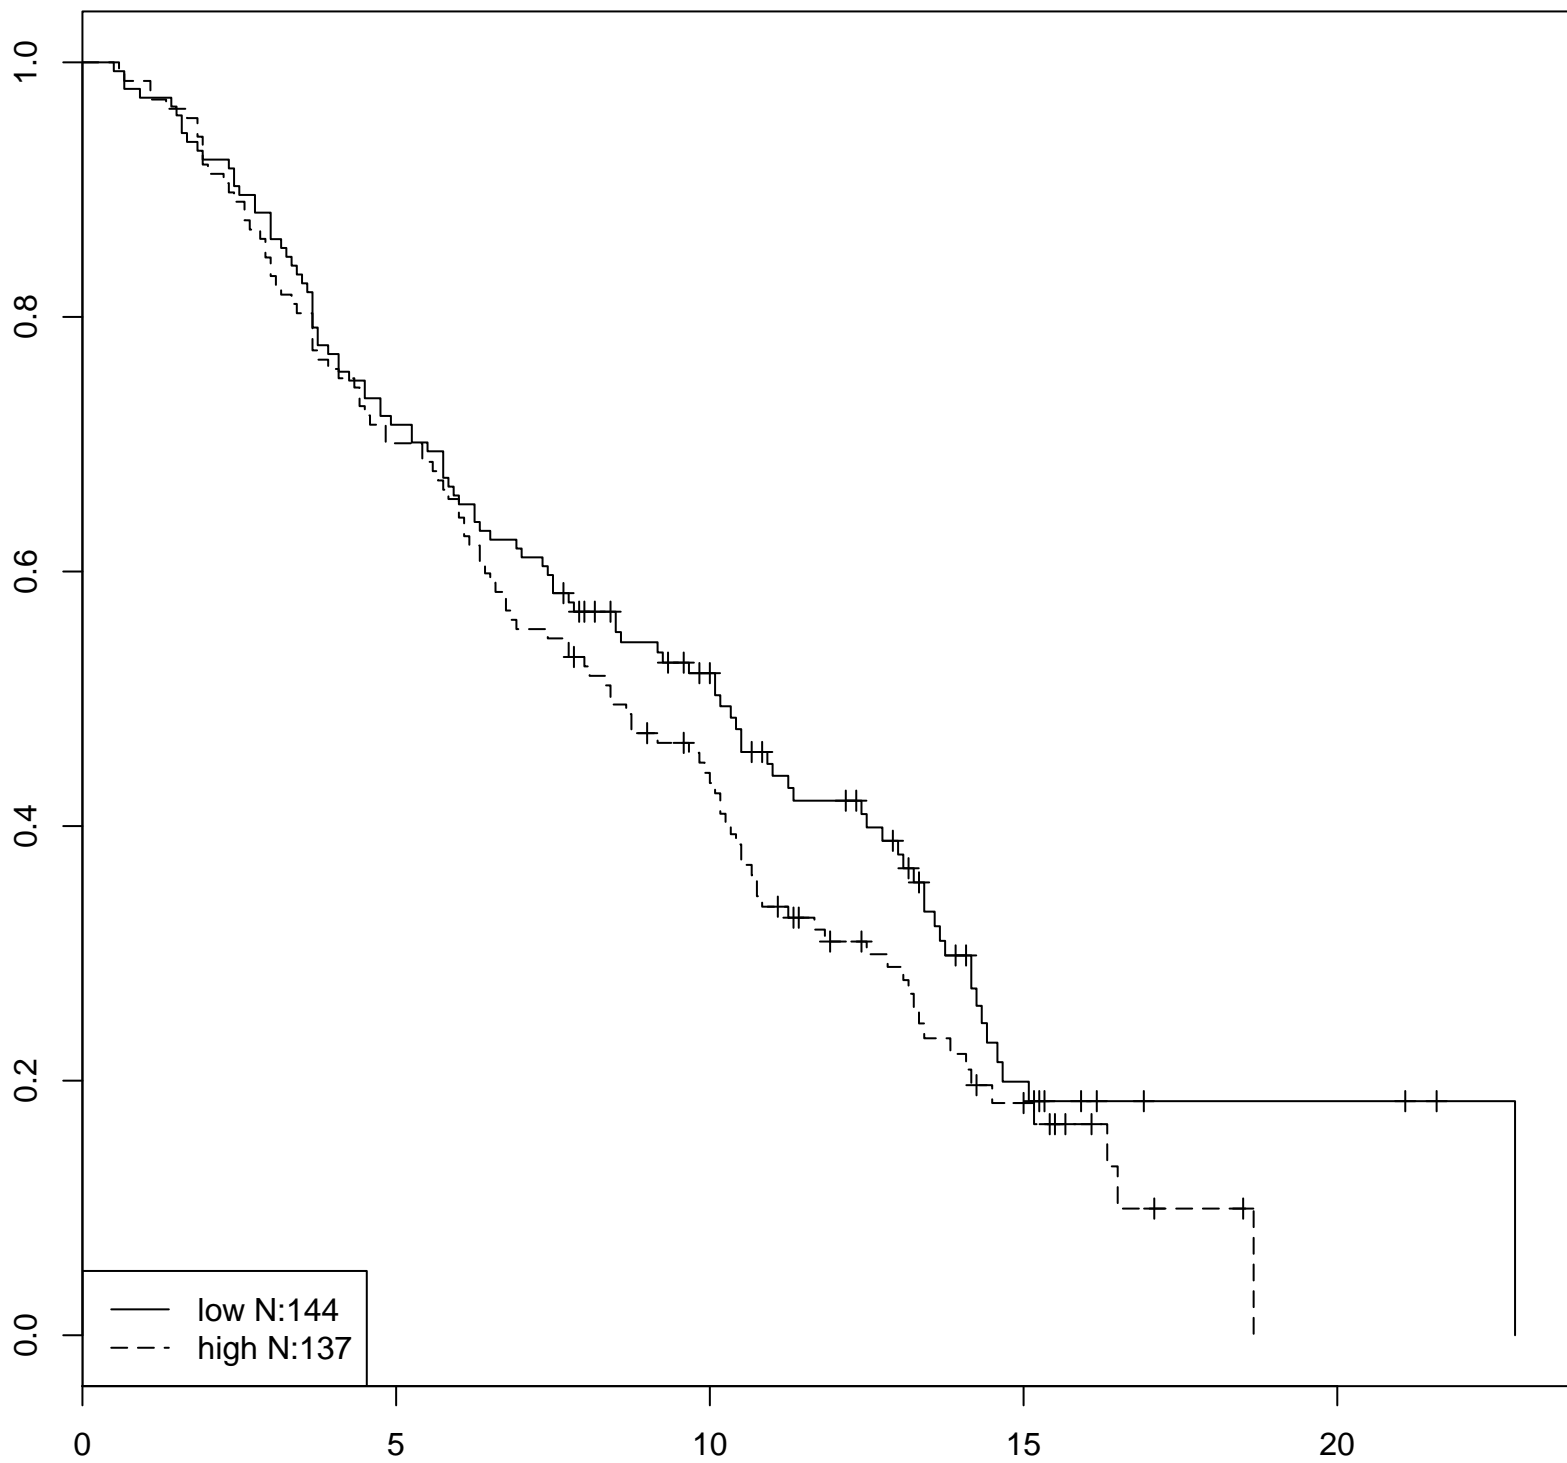

log-rank test p-value = 0.152

# Survival by SOX2 expression

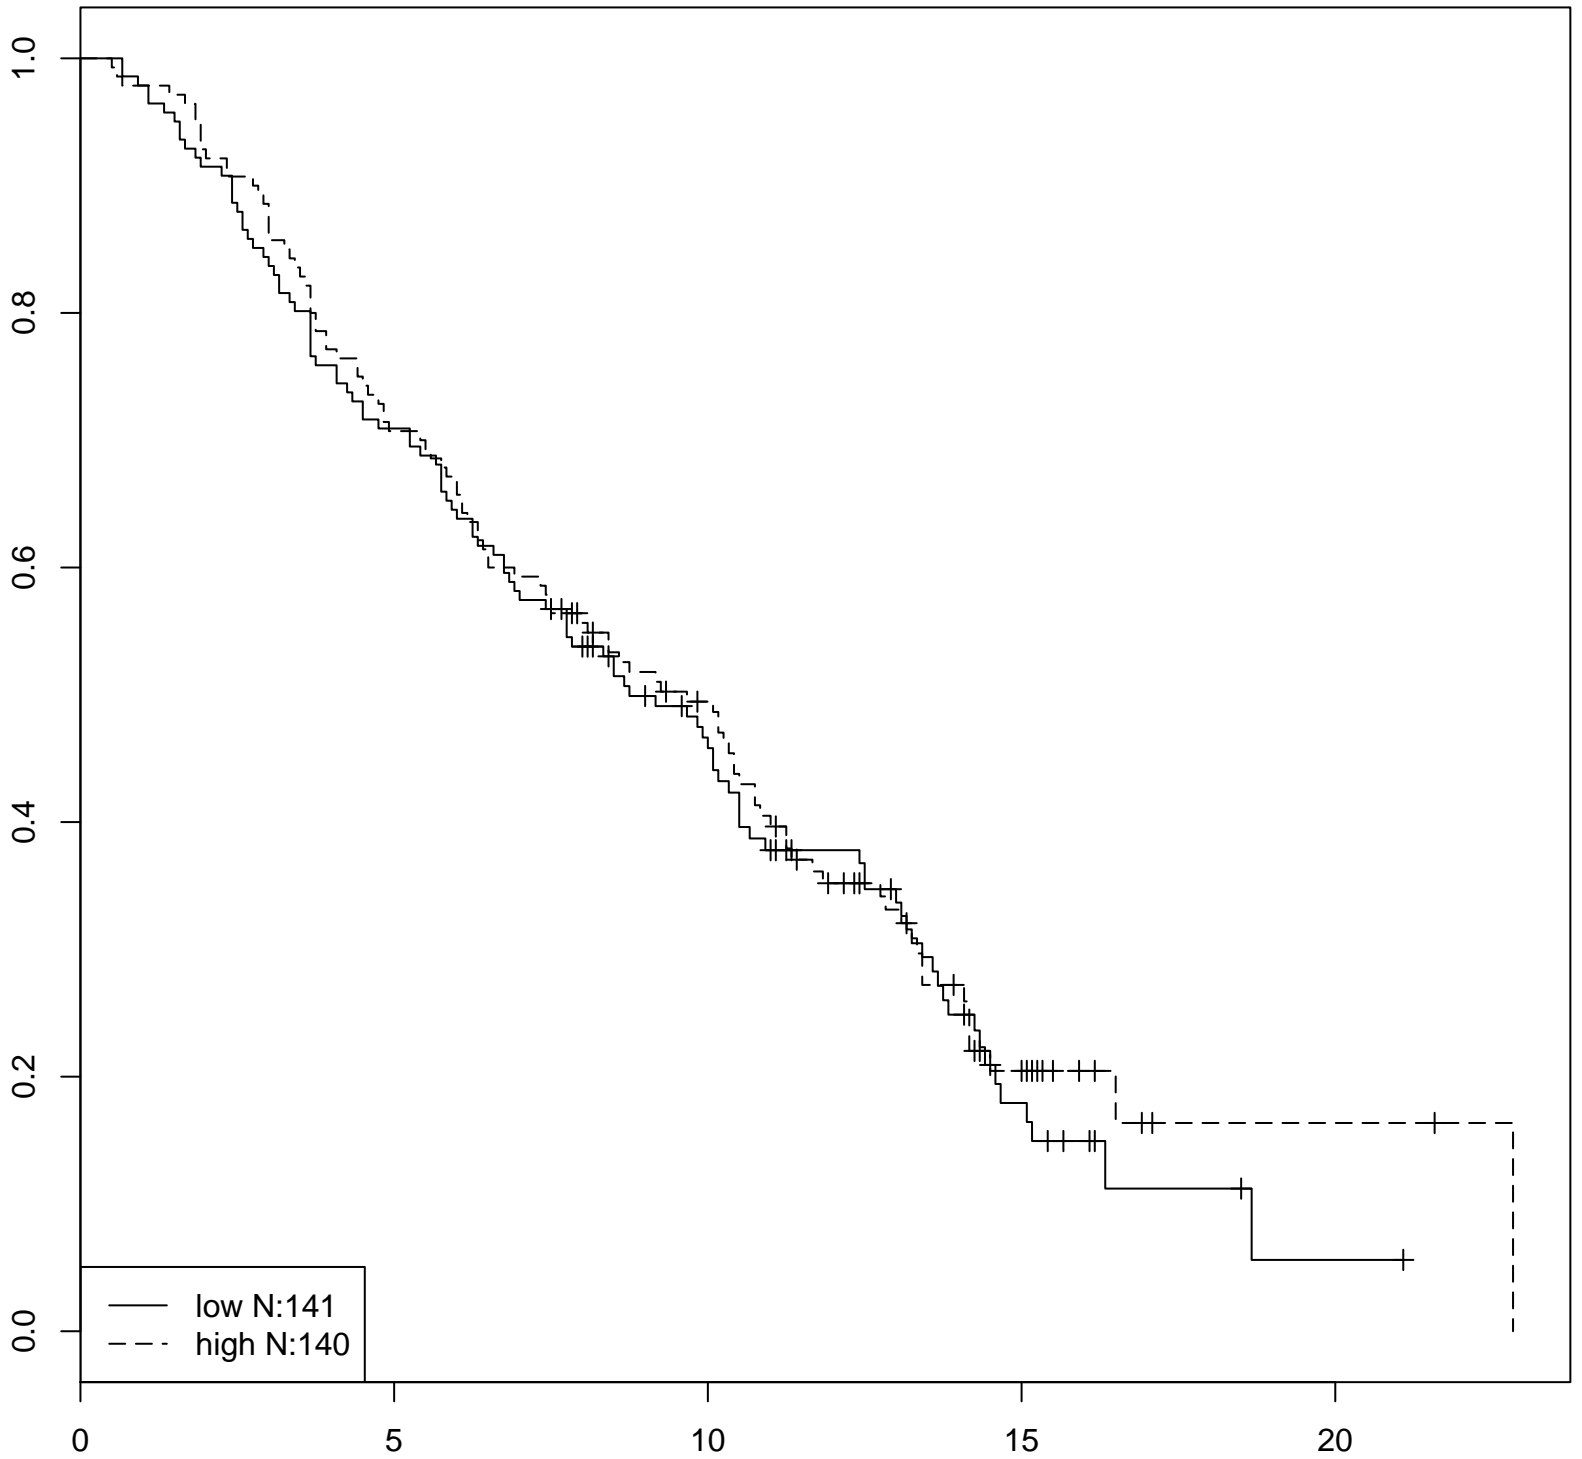

# Survival by SOX9 expression

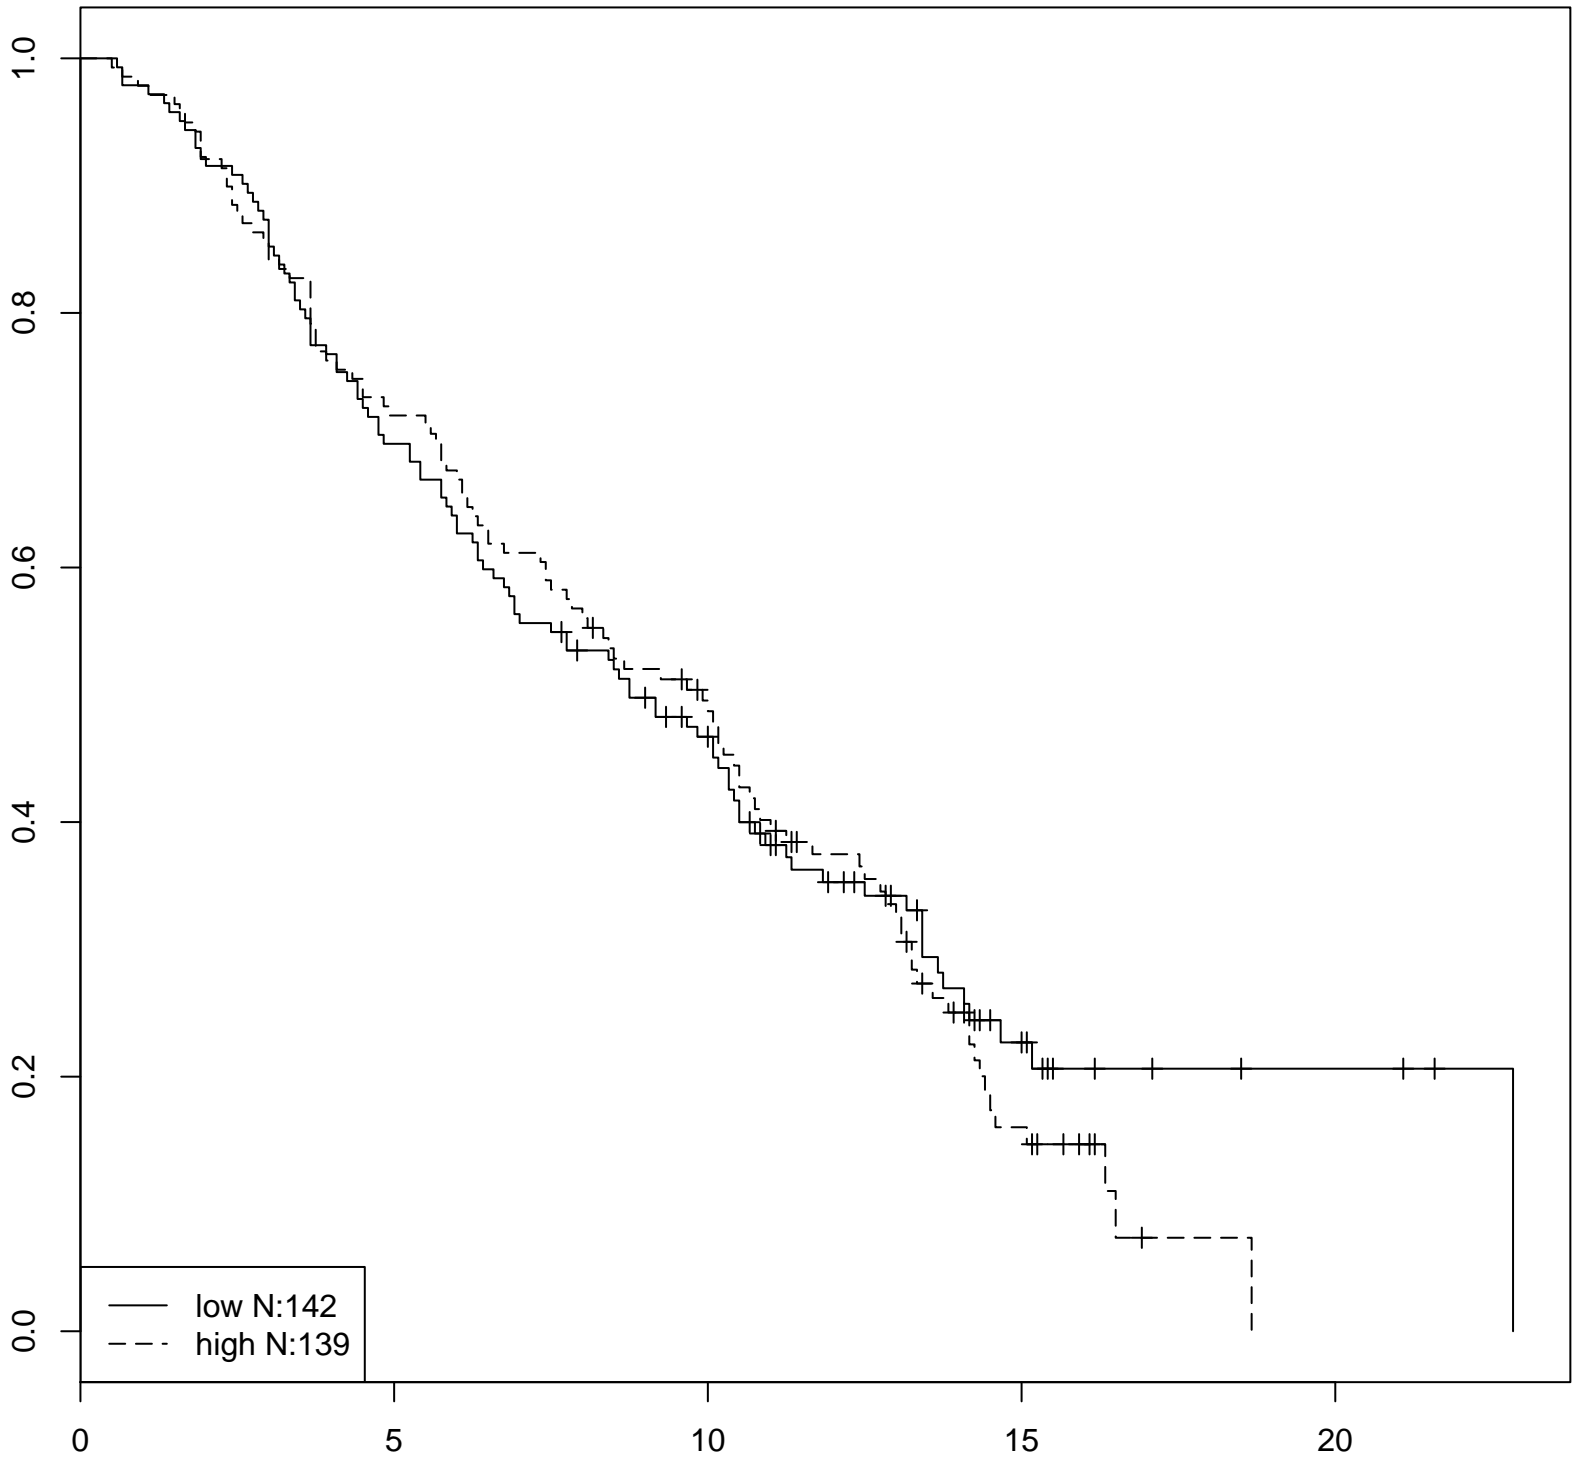

# Survival by SPA17 expression

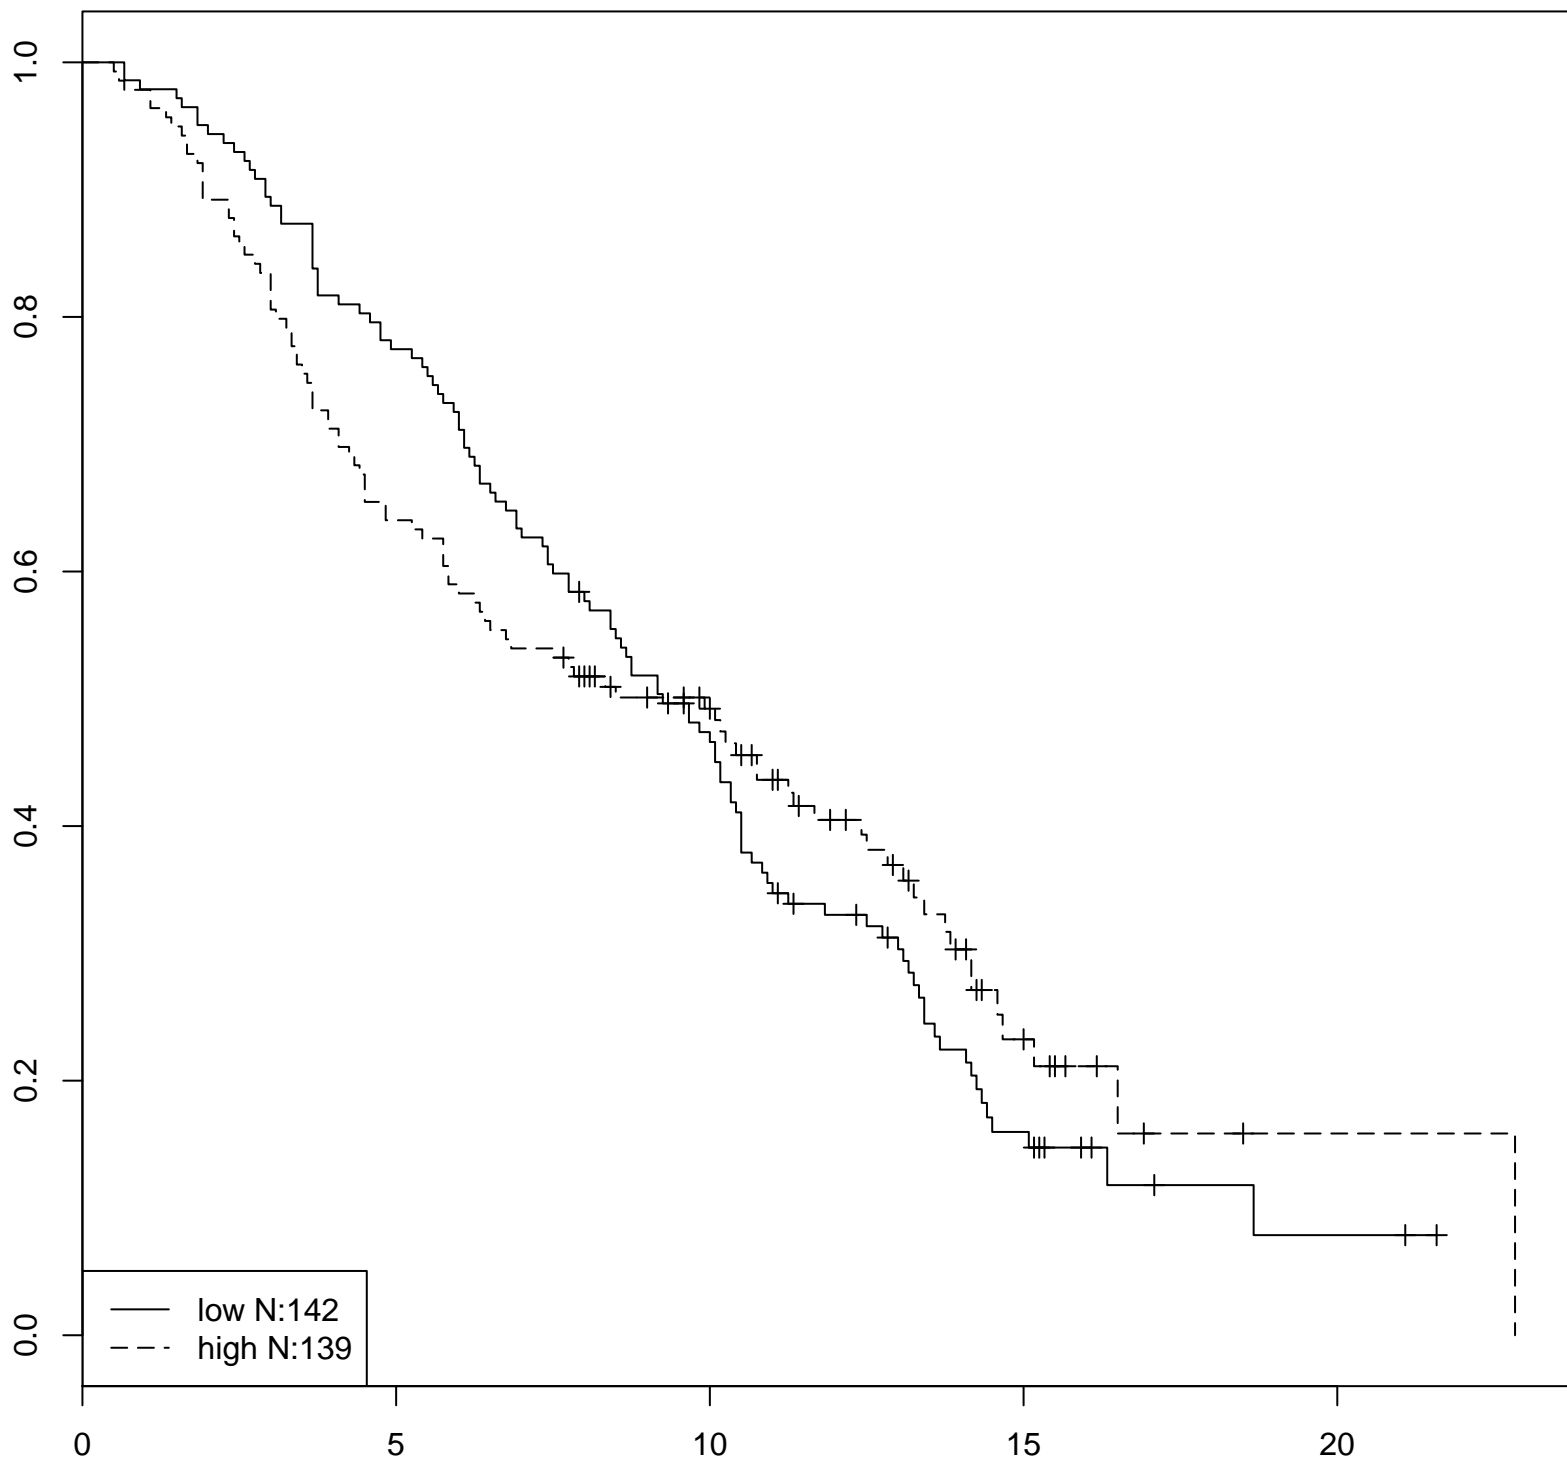

years

log-rank test p-value = 0.654

# Survival by SPDEF expression

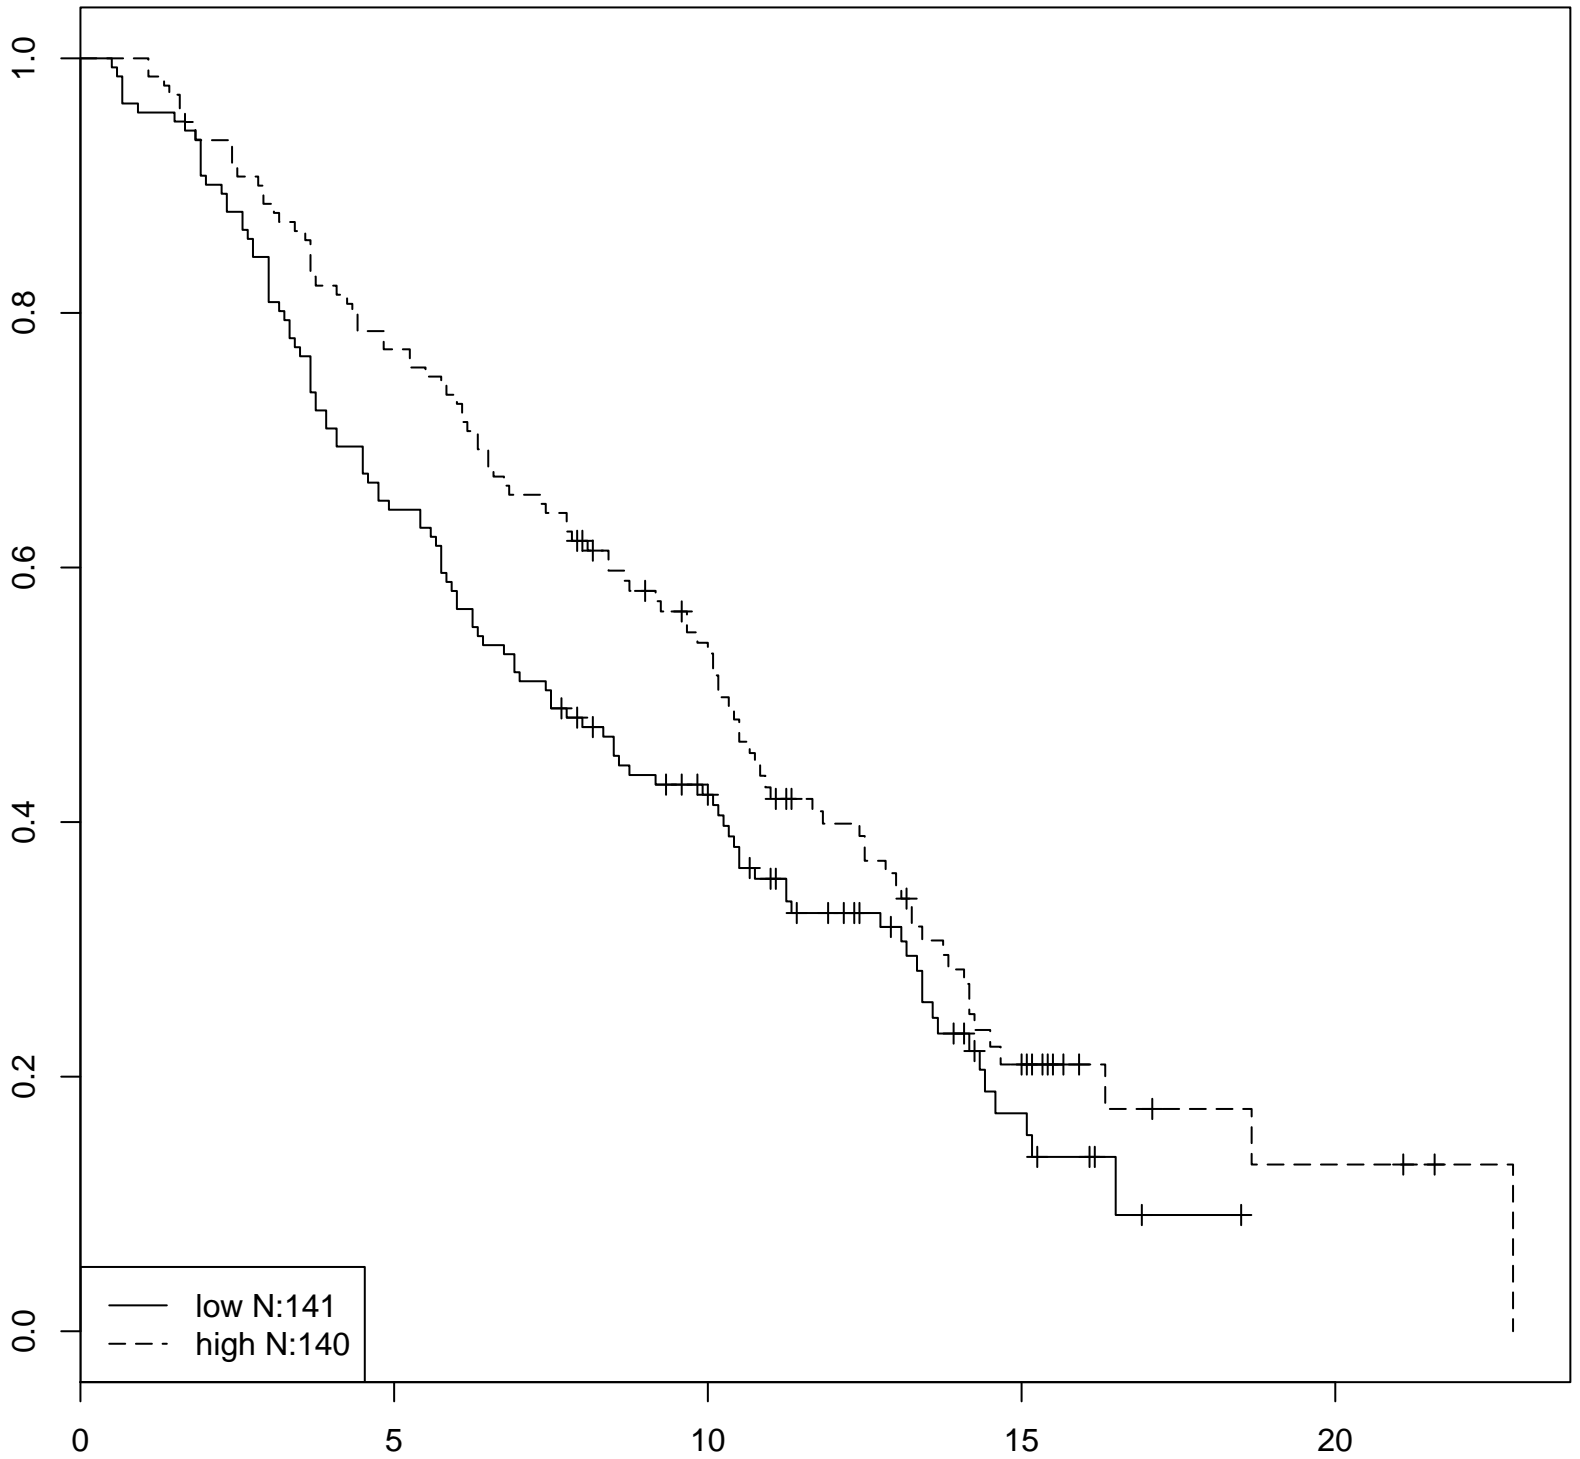

years

log-rank test p-value = 0.059



# Survival by SPINK1 expression

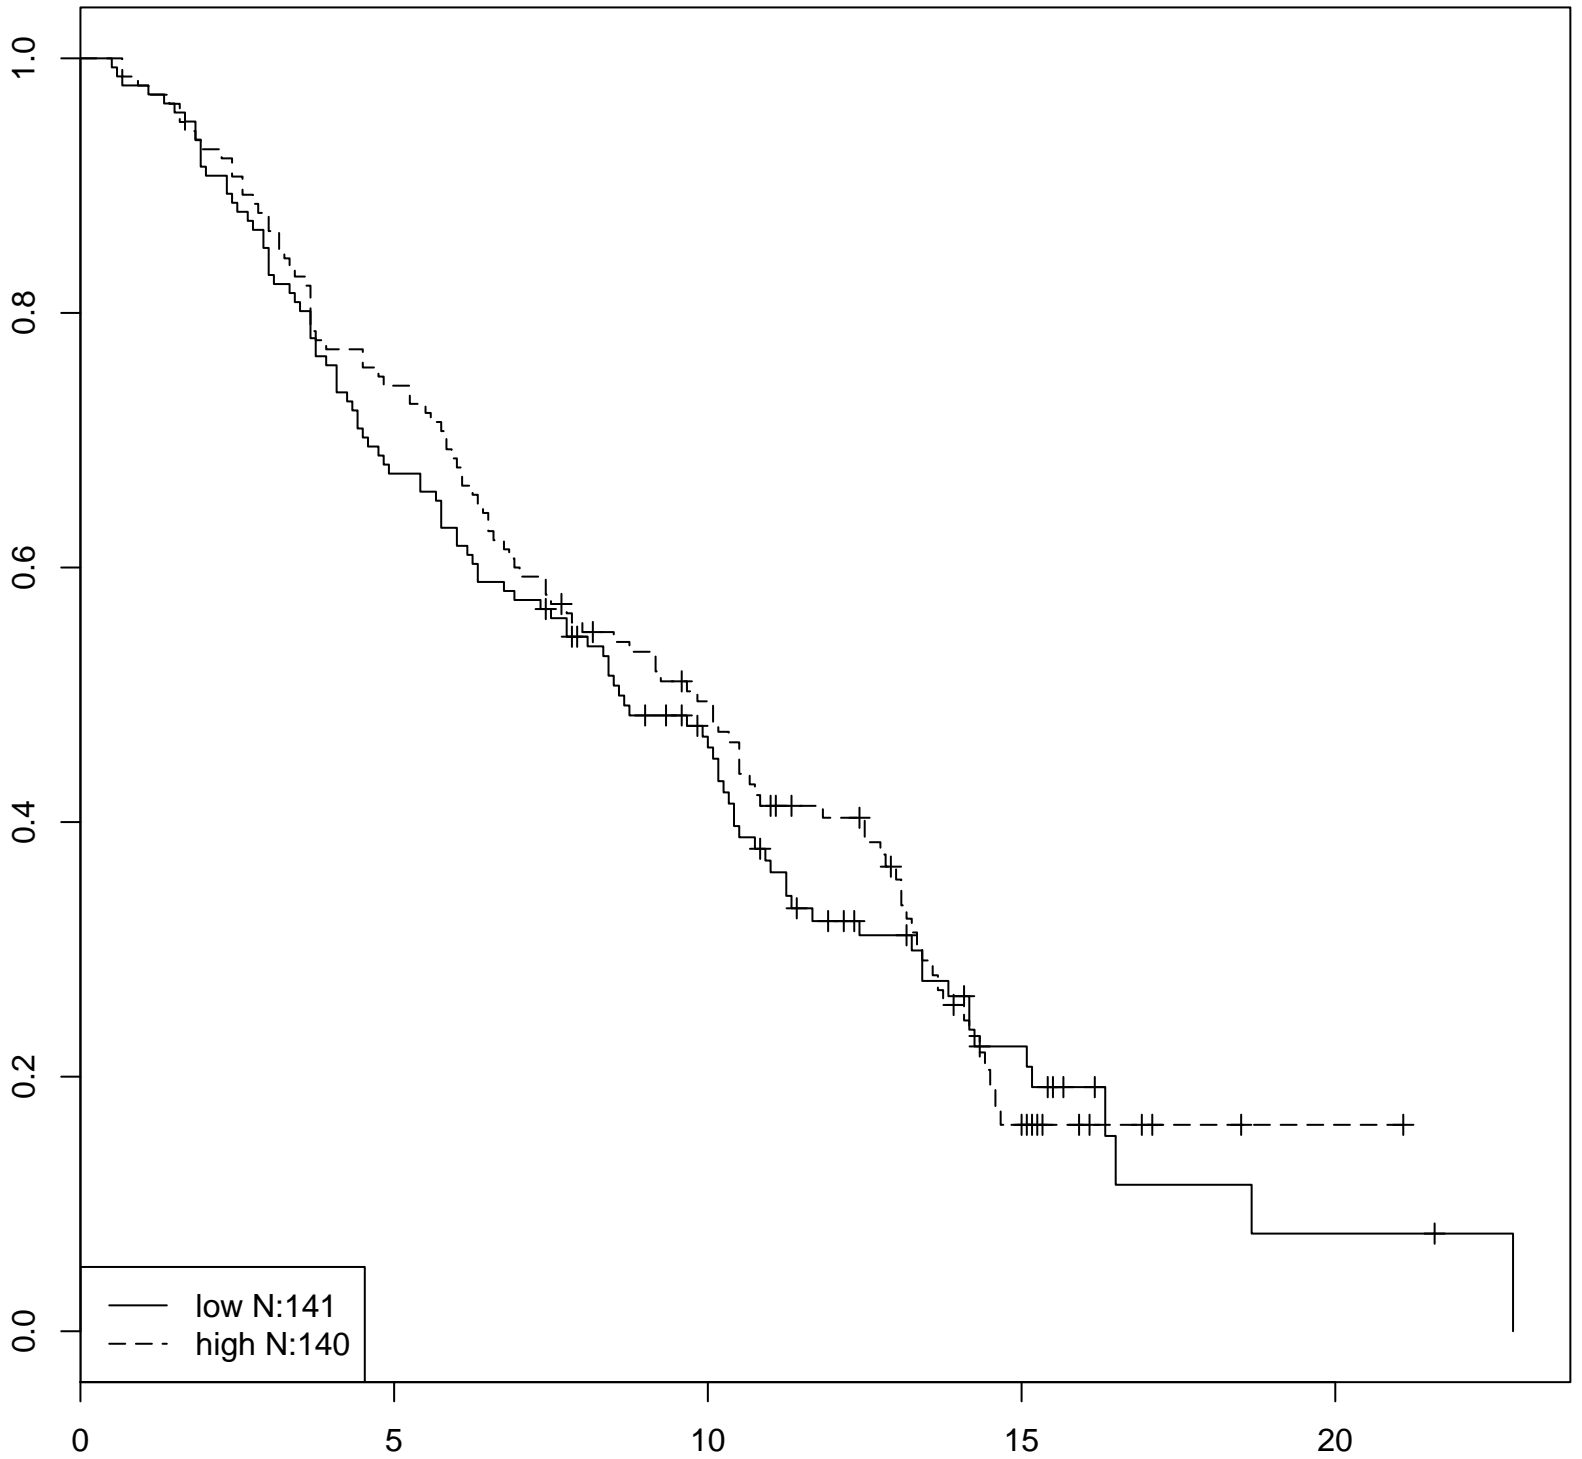

years

log-rank test p-value = 0.609

# Survival by SPOCK2 expression

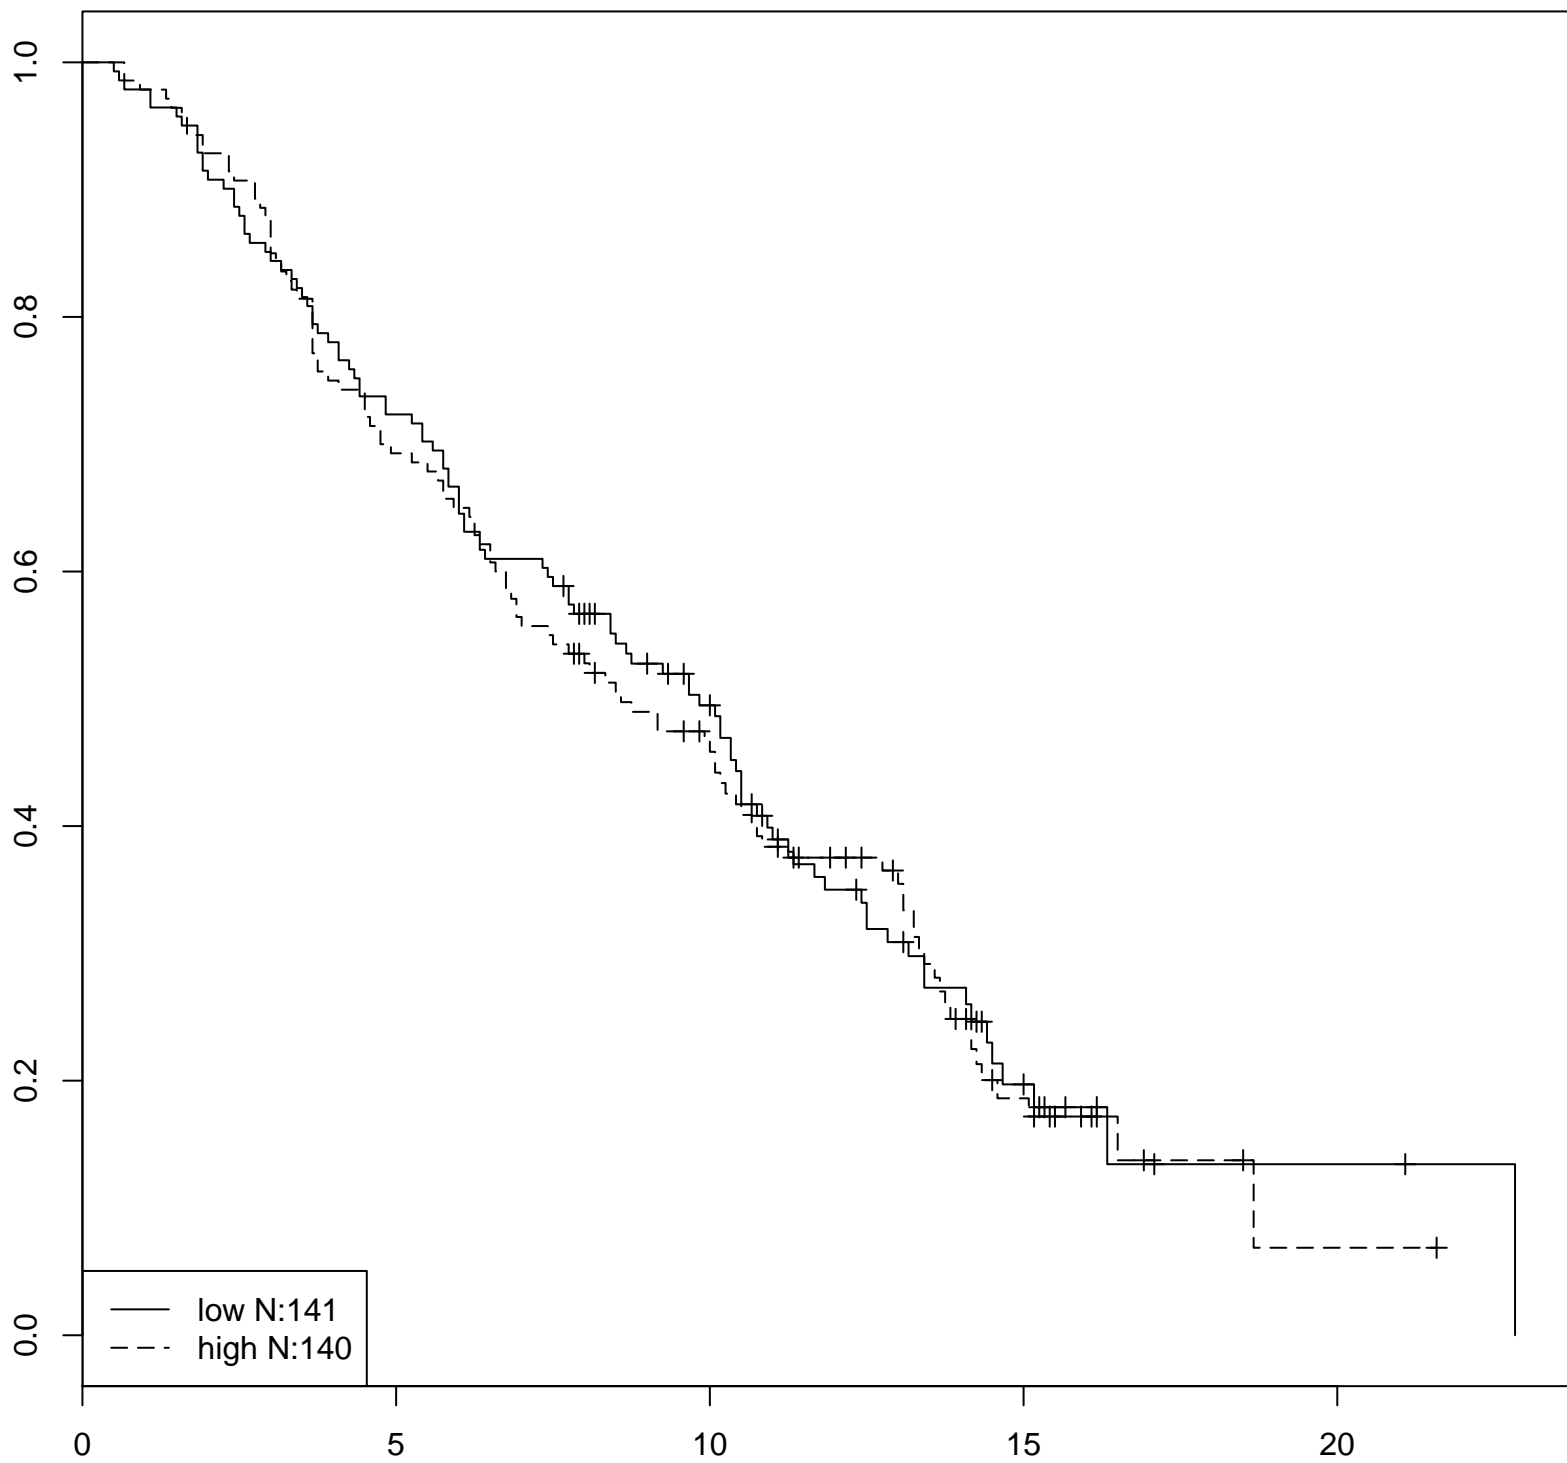

years

log-rank test p-value = 0.783

# Survival by SPON2 expression

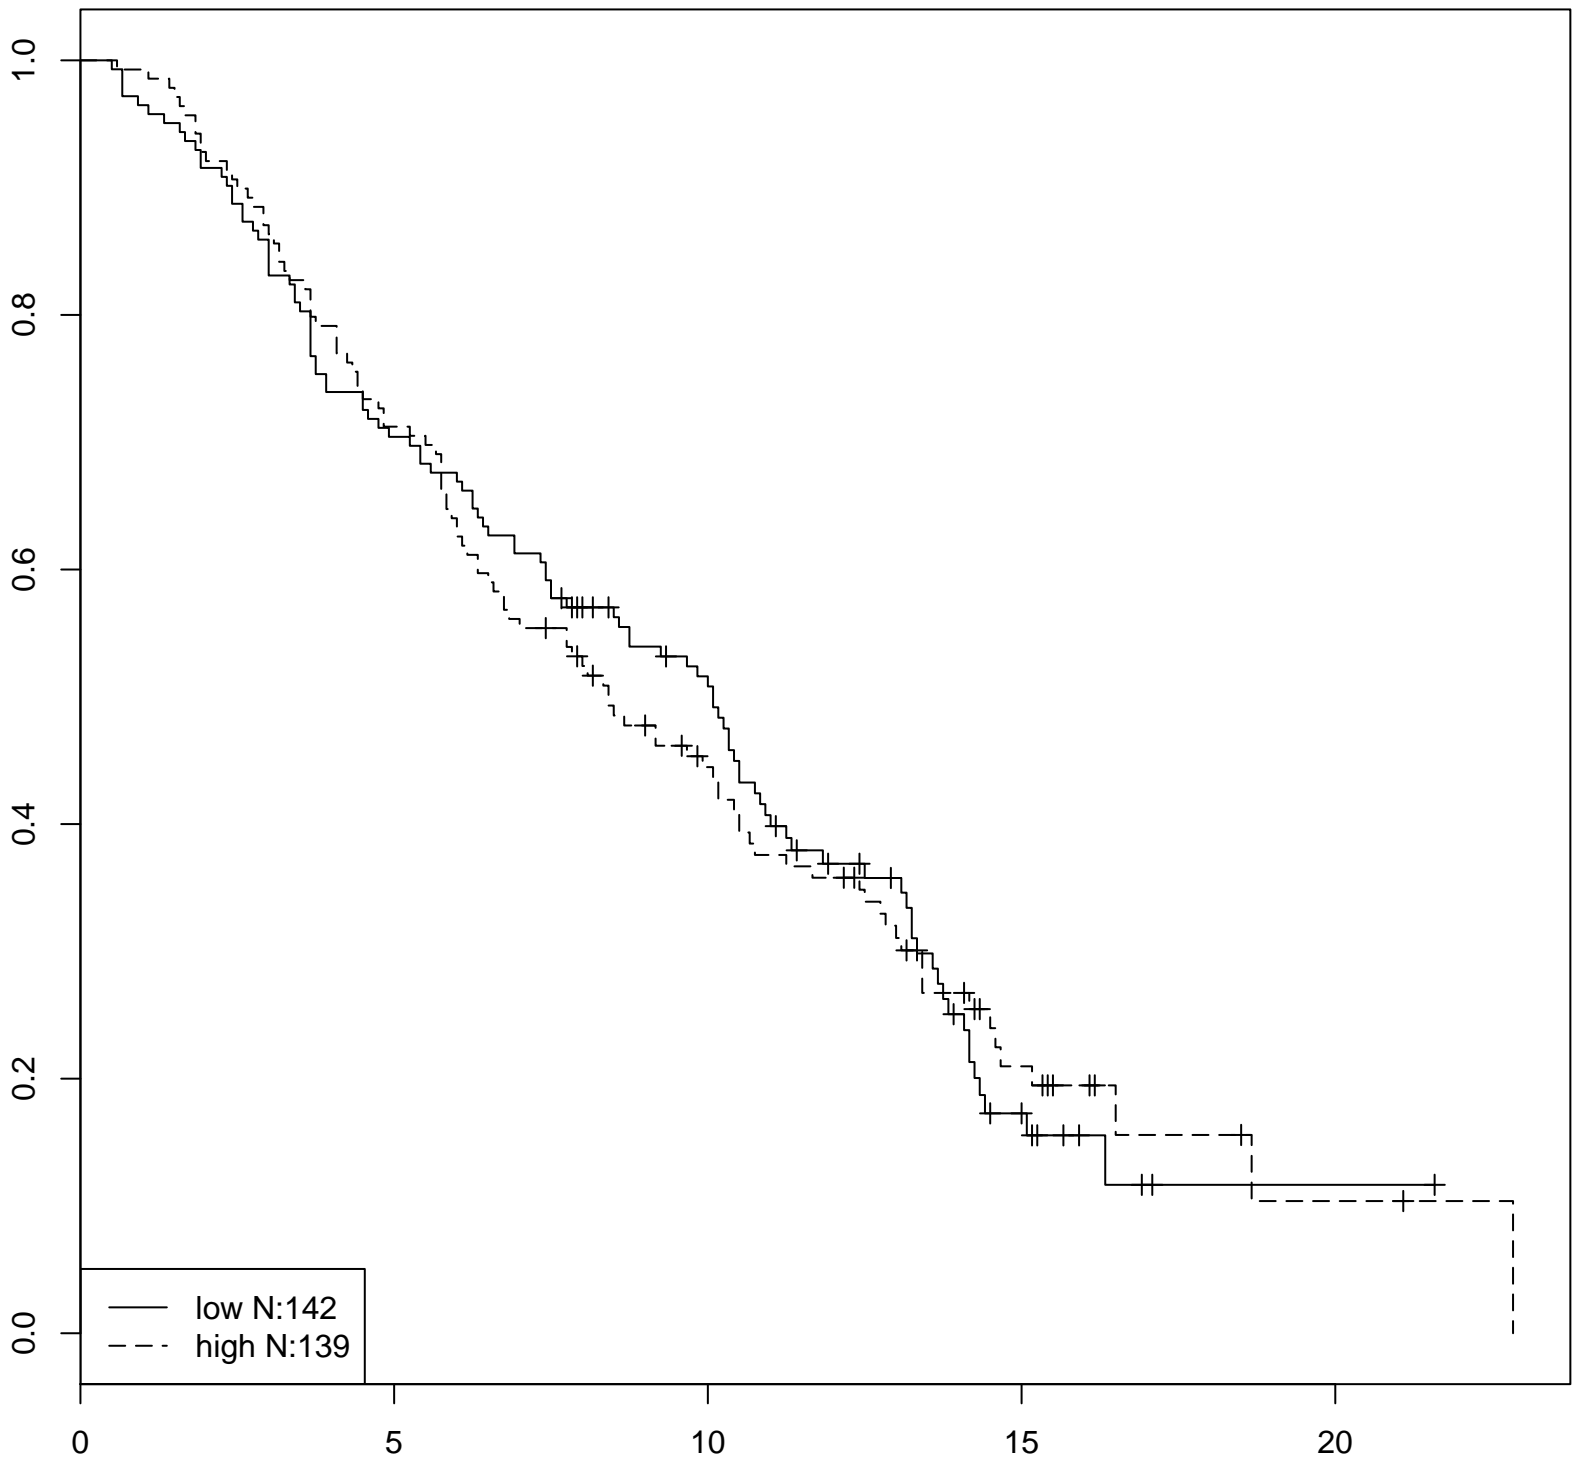

years

log-rank test p-value = 0.967

# Survival by SPP1 expression

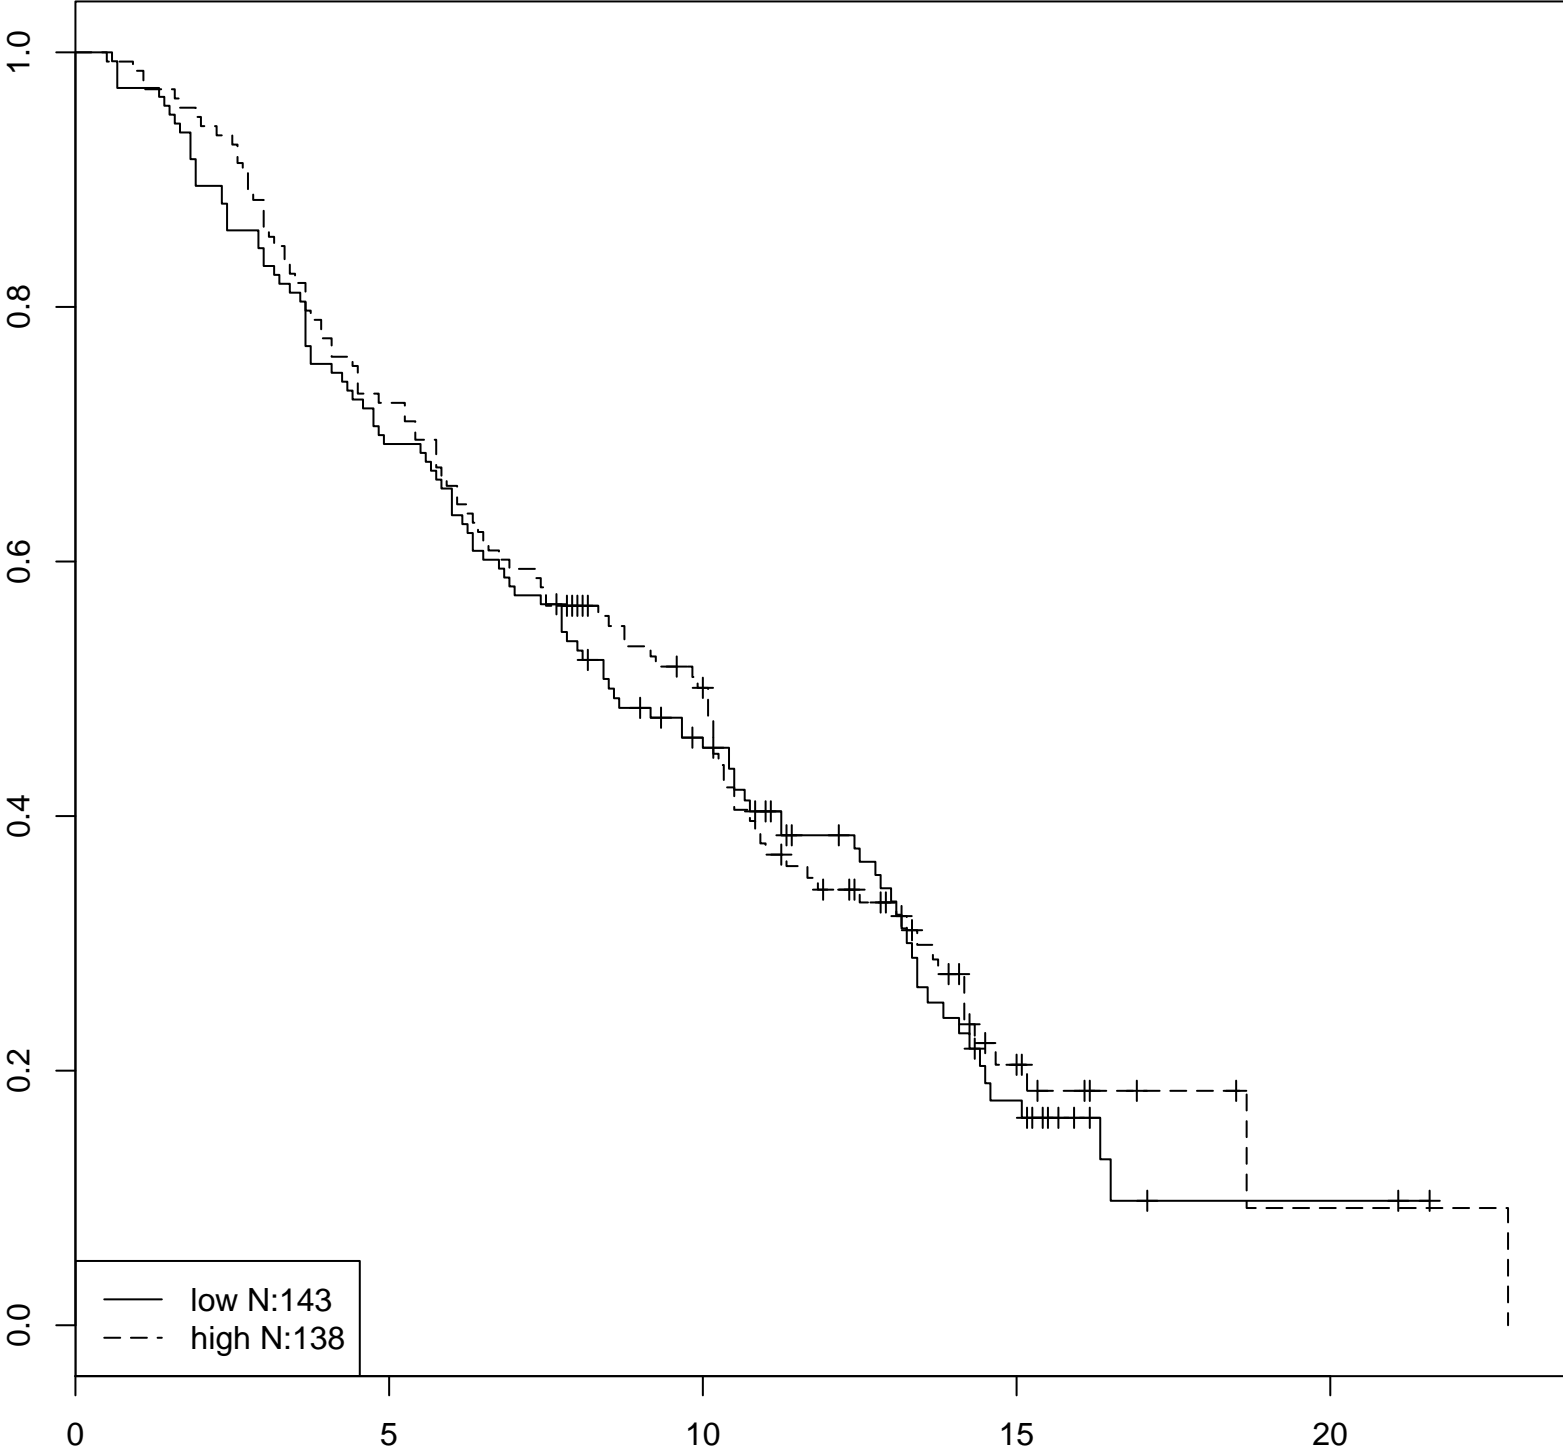

years

log-rank test p-value = 0.652

# Survival by SSBP2 expression

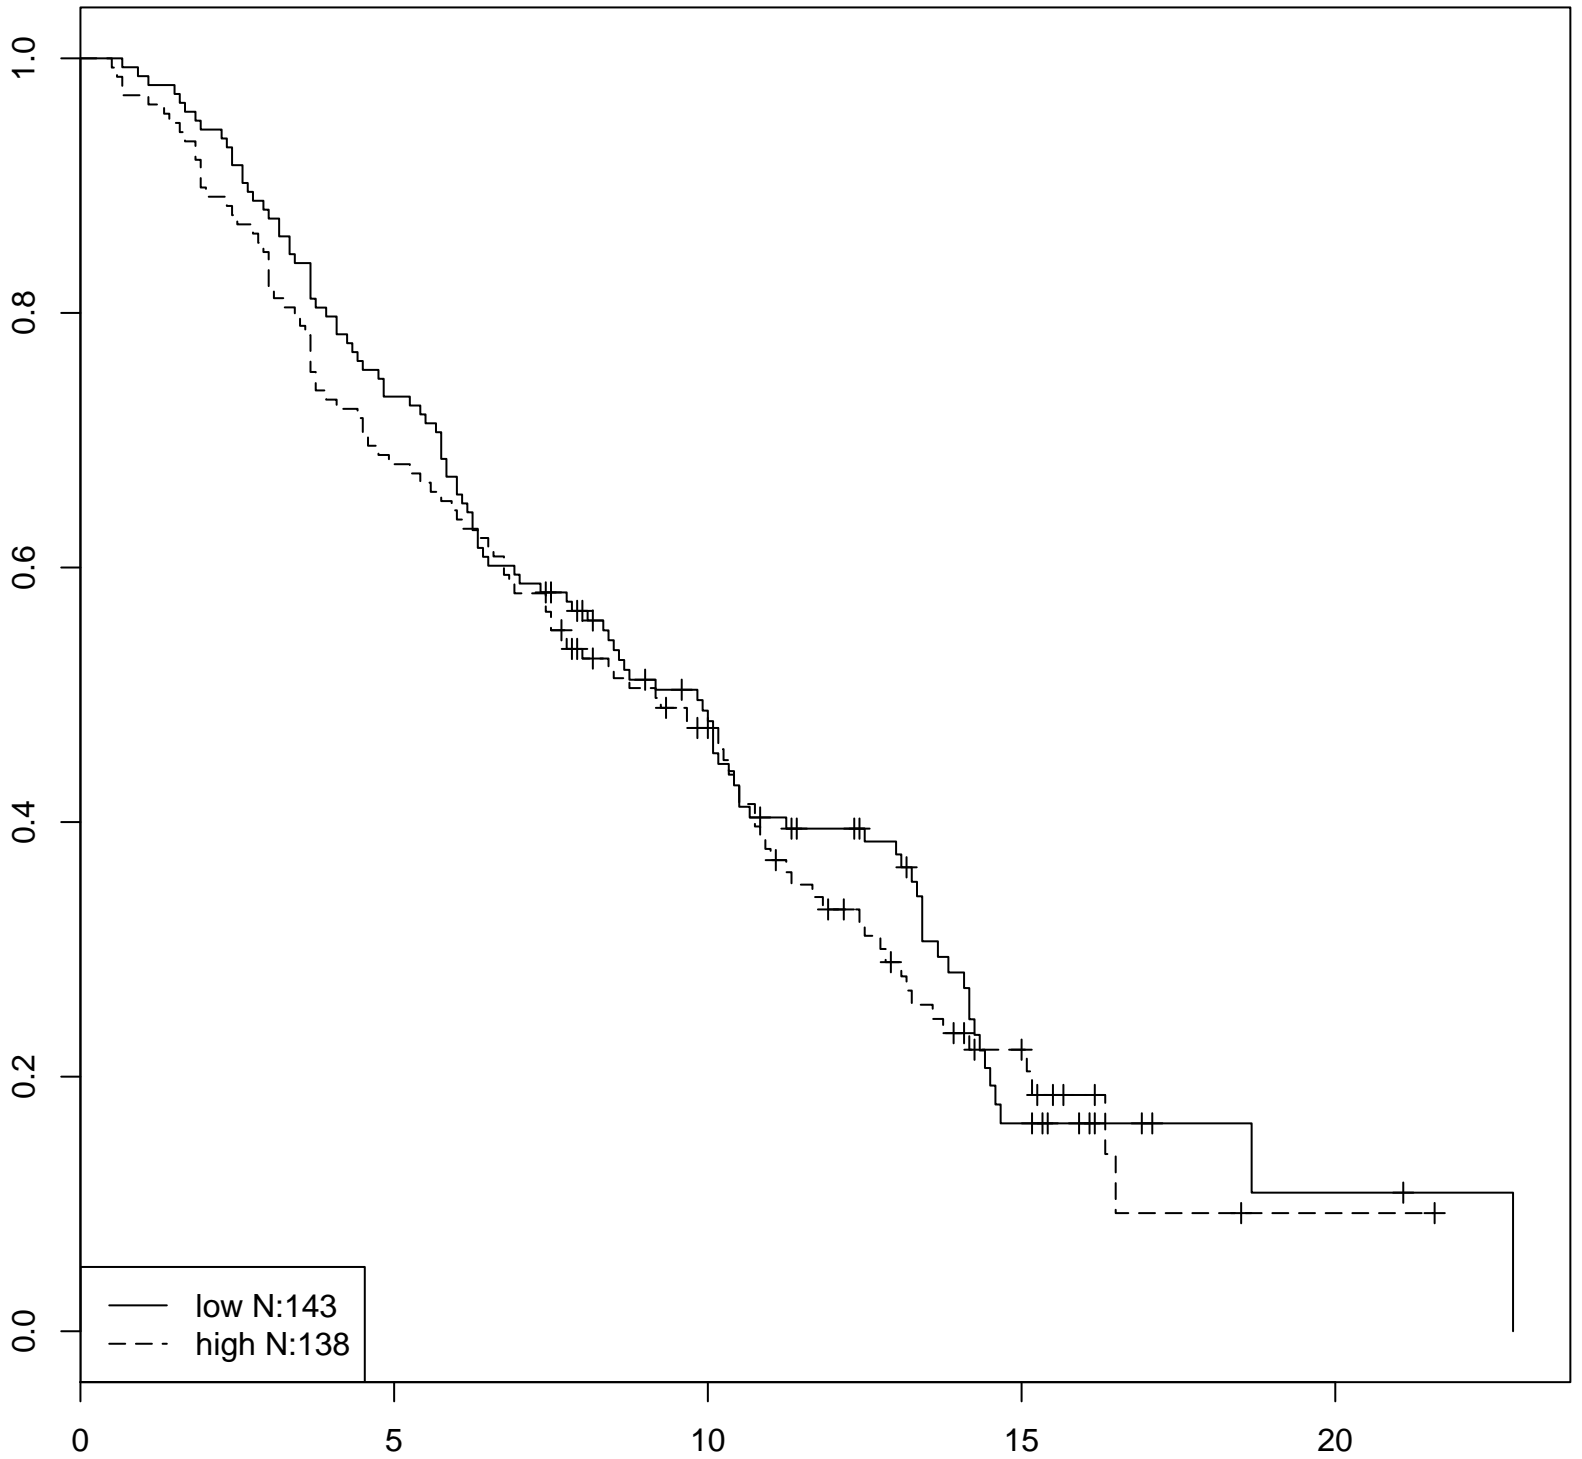

years

log-rank test p-value = 0.556

# Survival by STAT6 expression

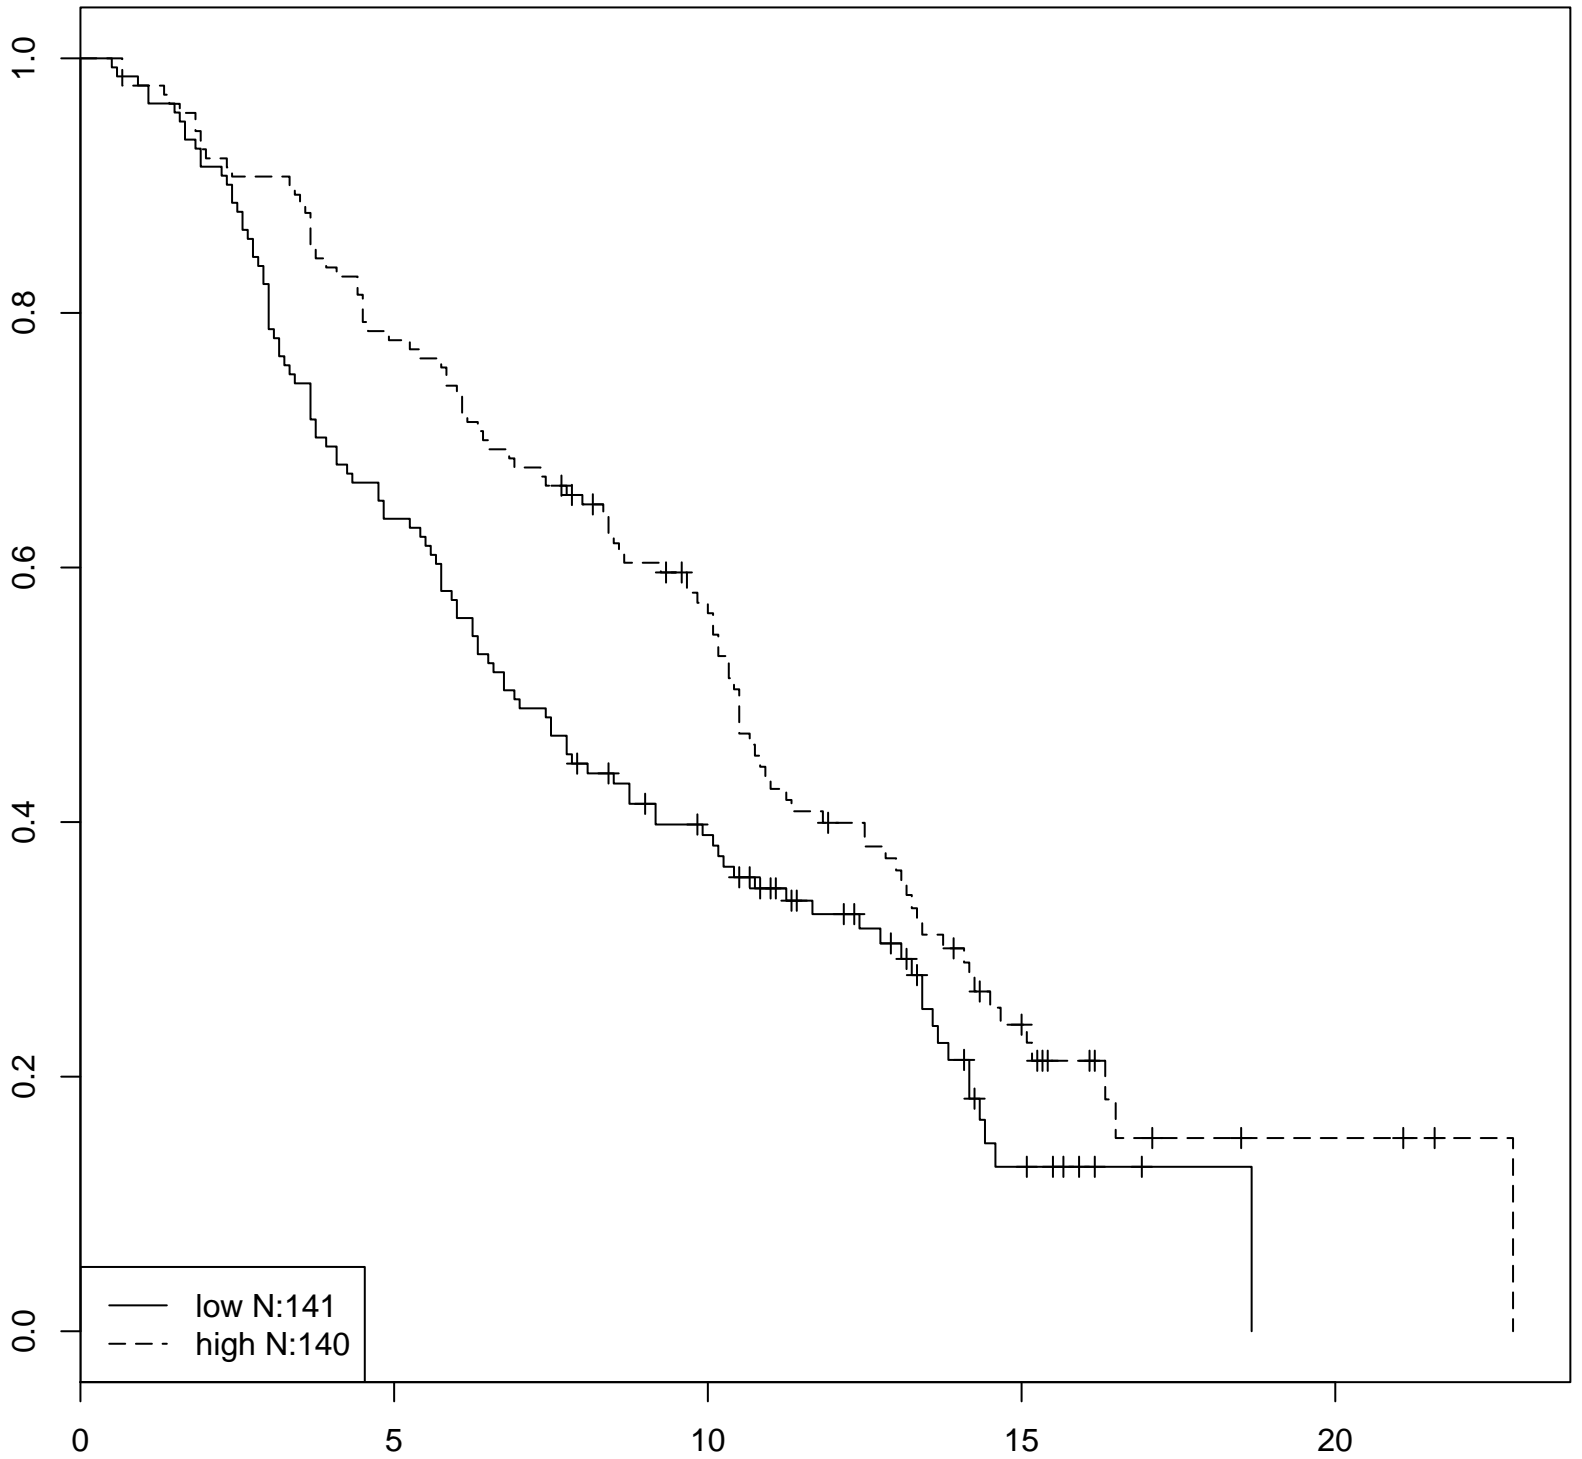

years

log-rank test p-value = 0.01

# Survival by STEAP2 expression

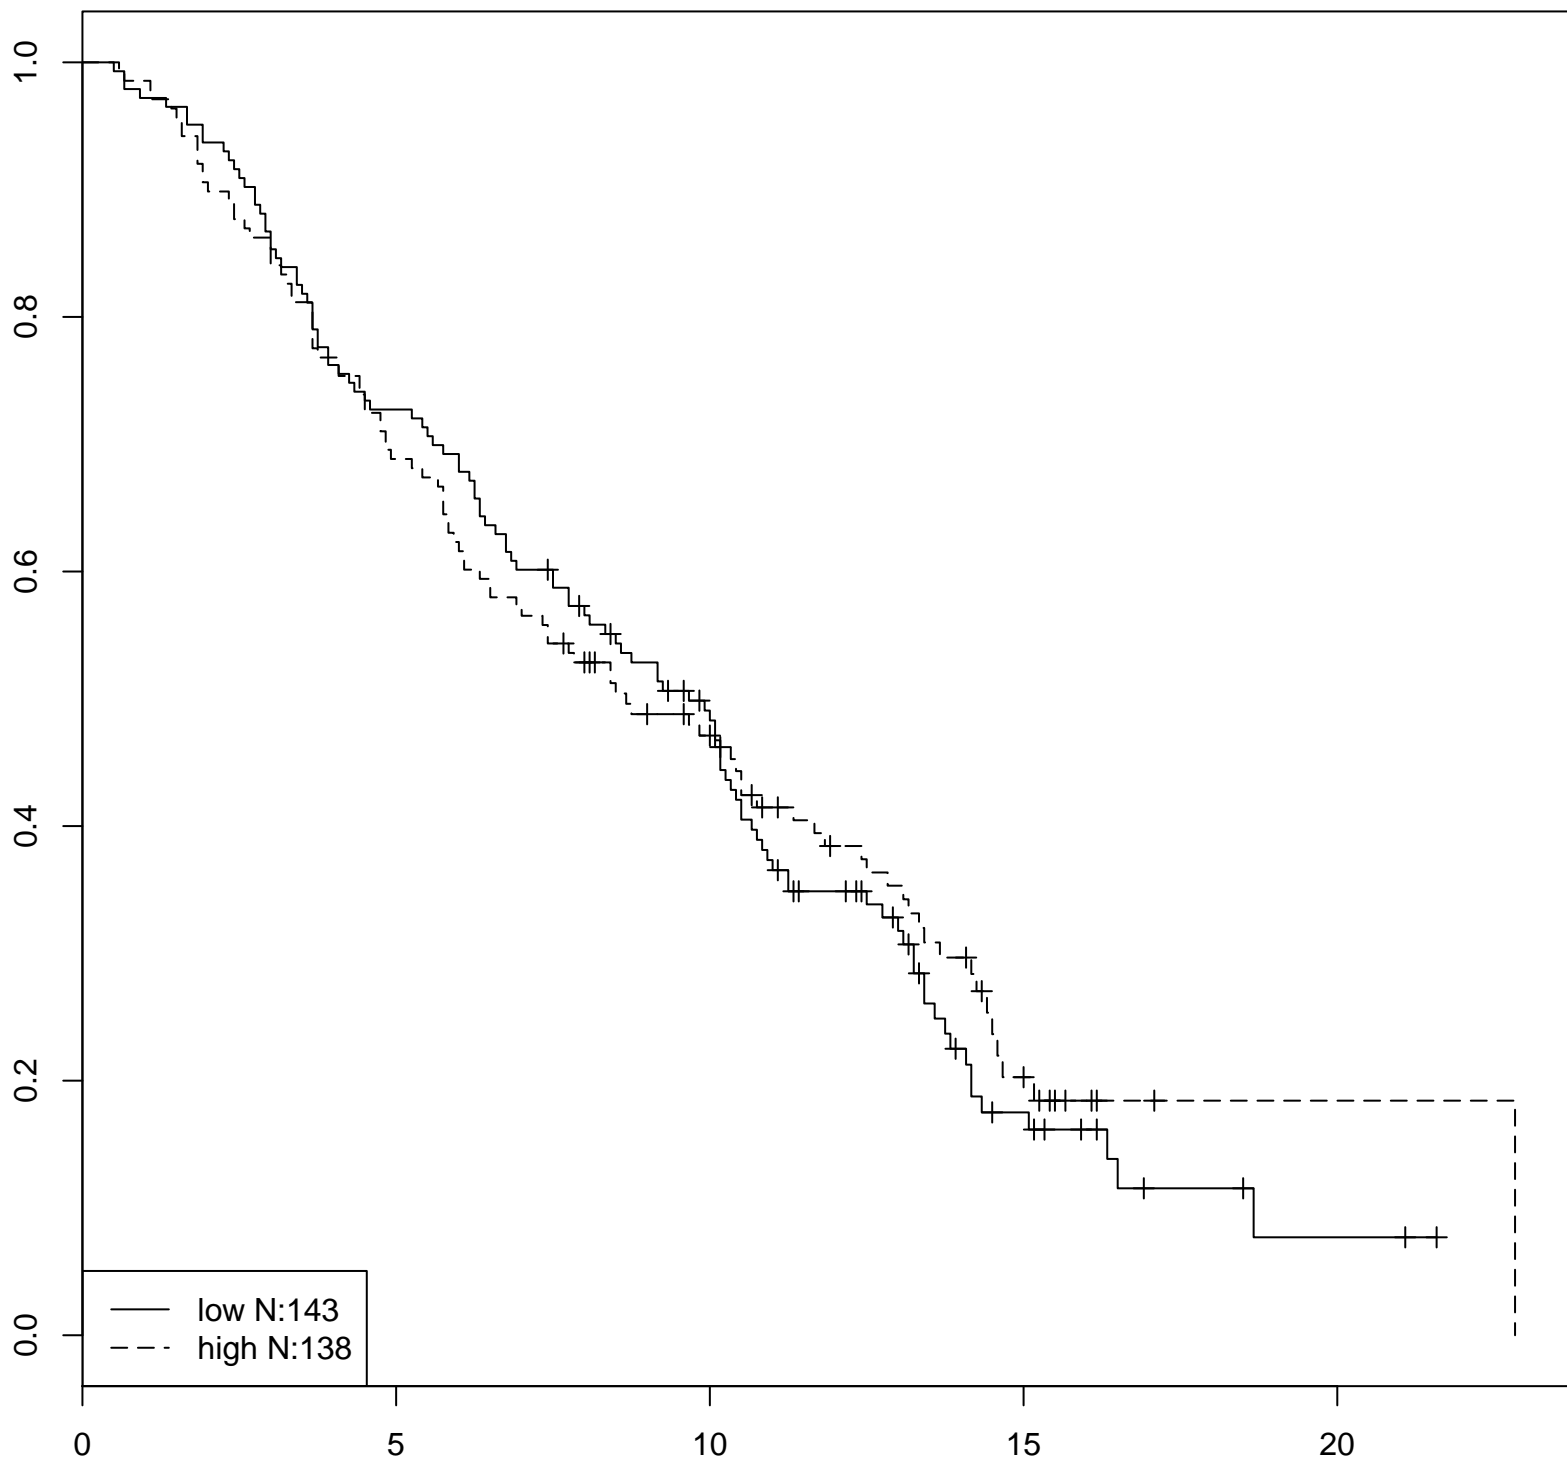

years  
log-rank test p-value = 0.669

# Survival by SYP expression

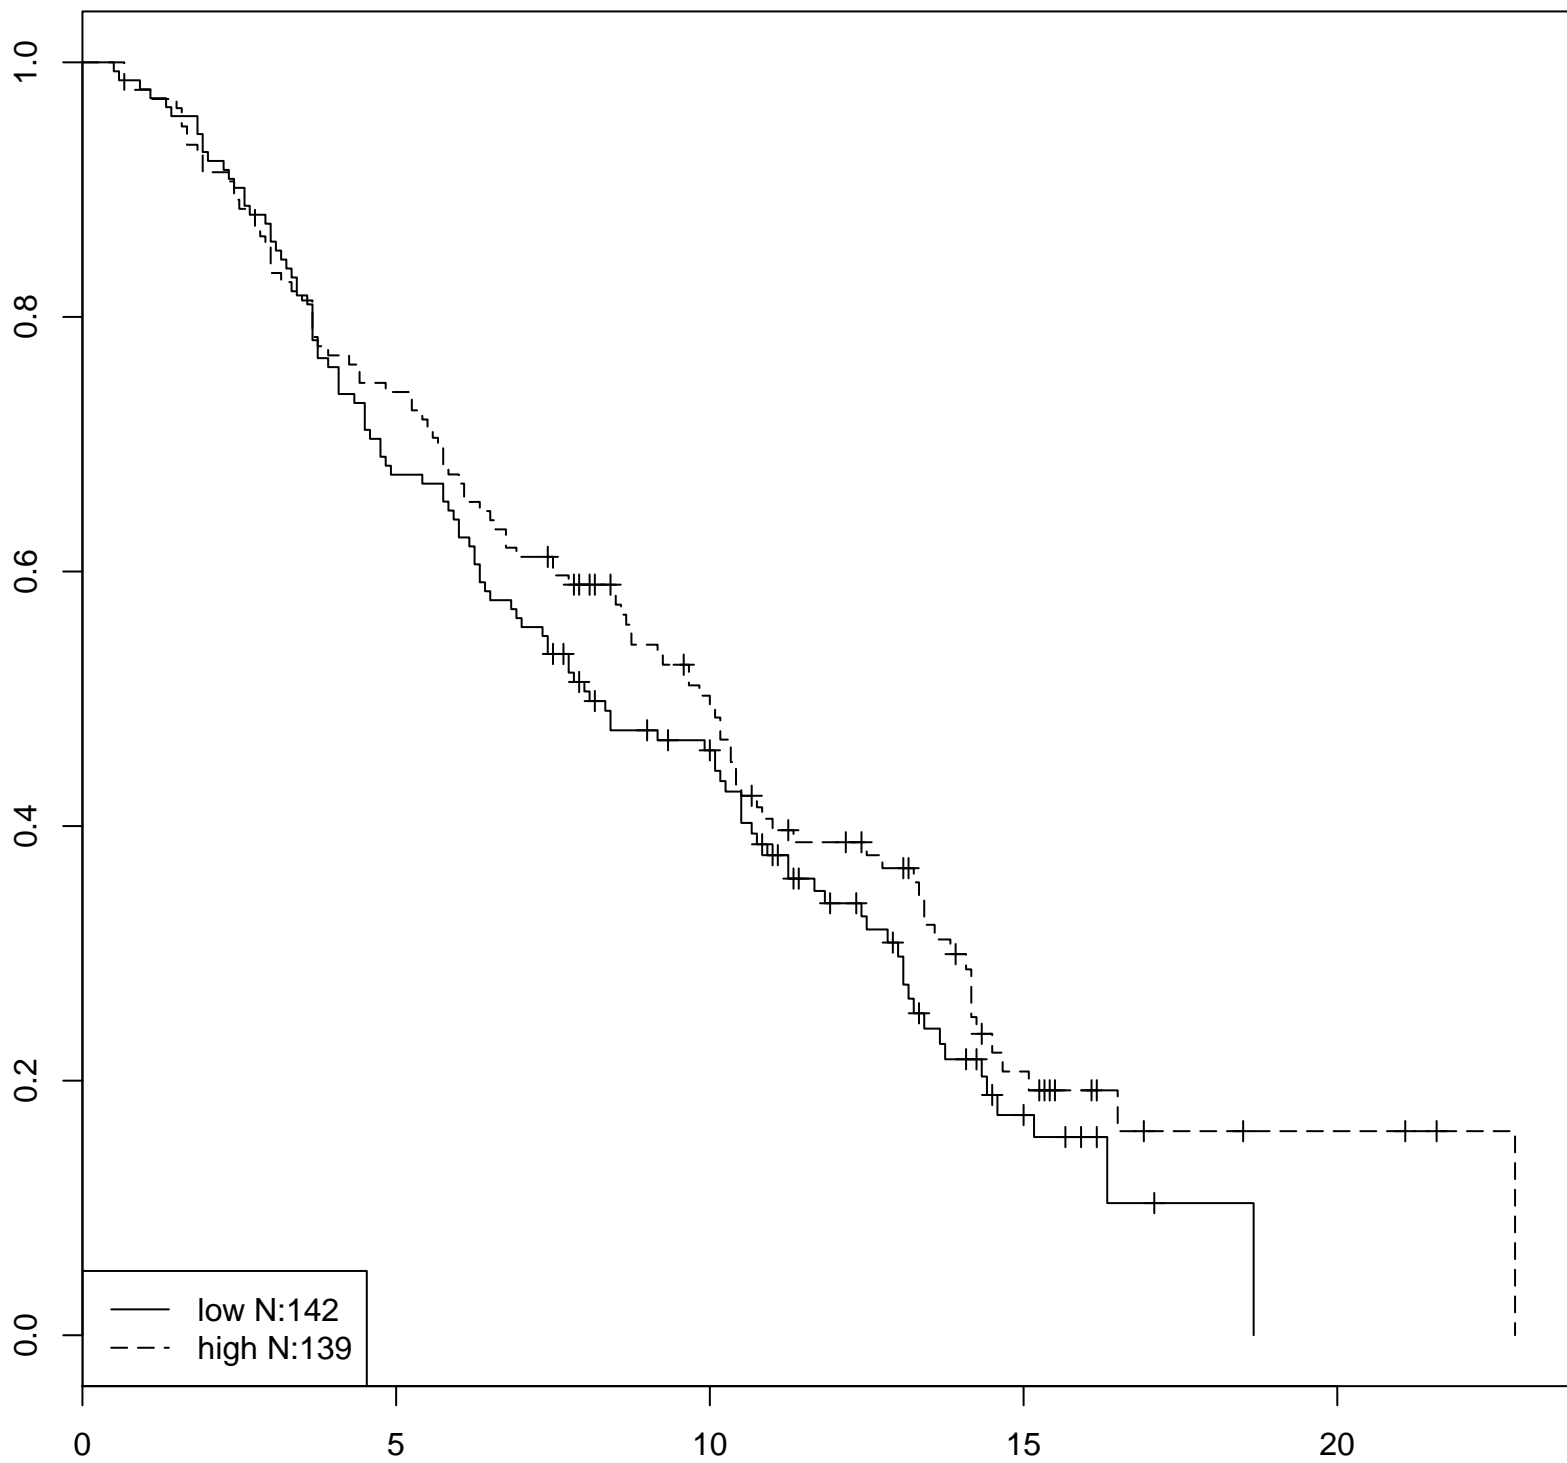

years

log-rank test p-value = 0.249



# Survival by TACC1 expression

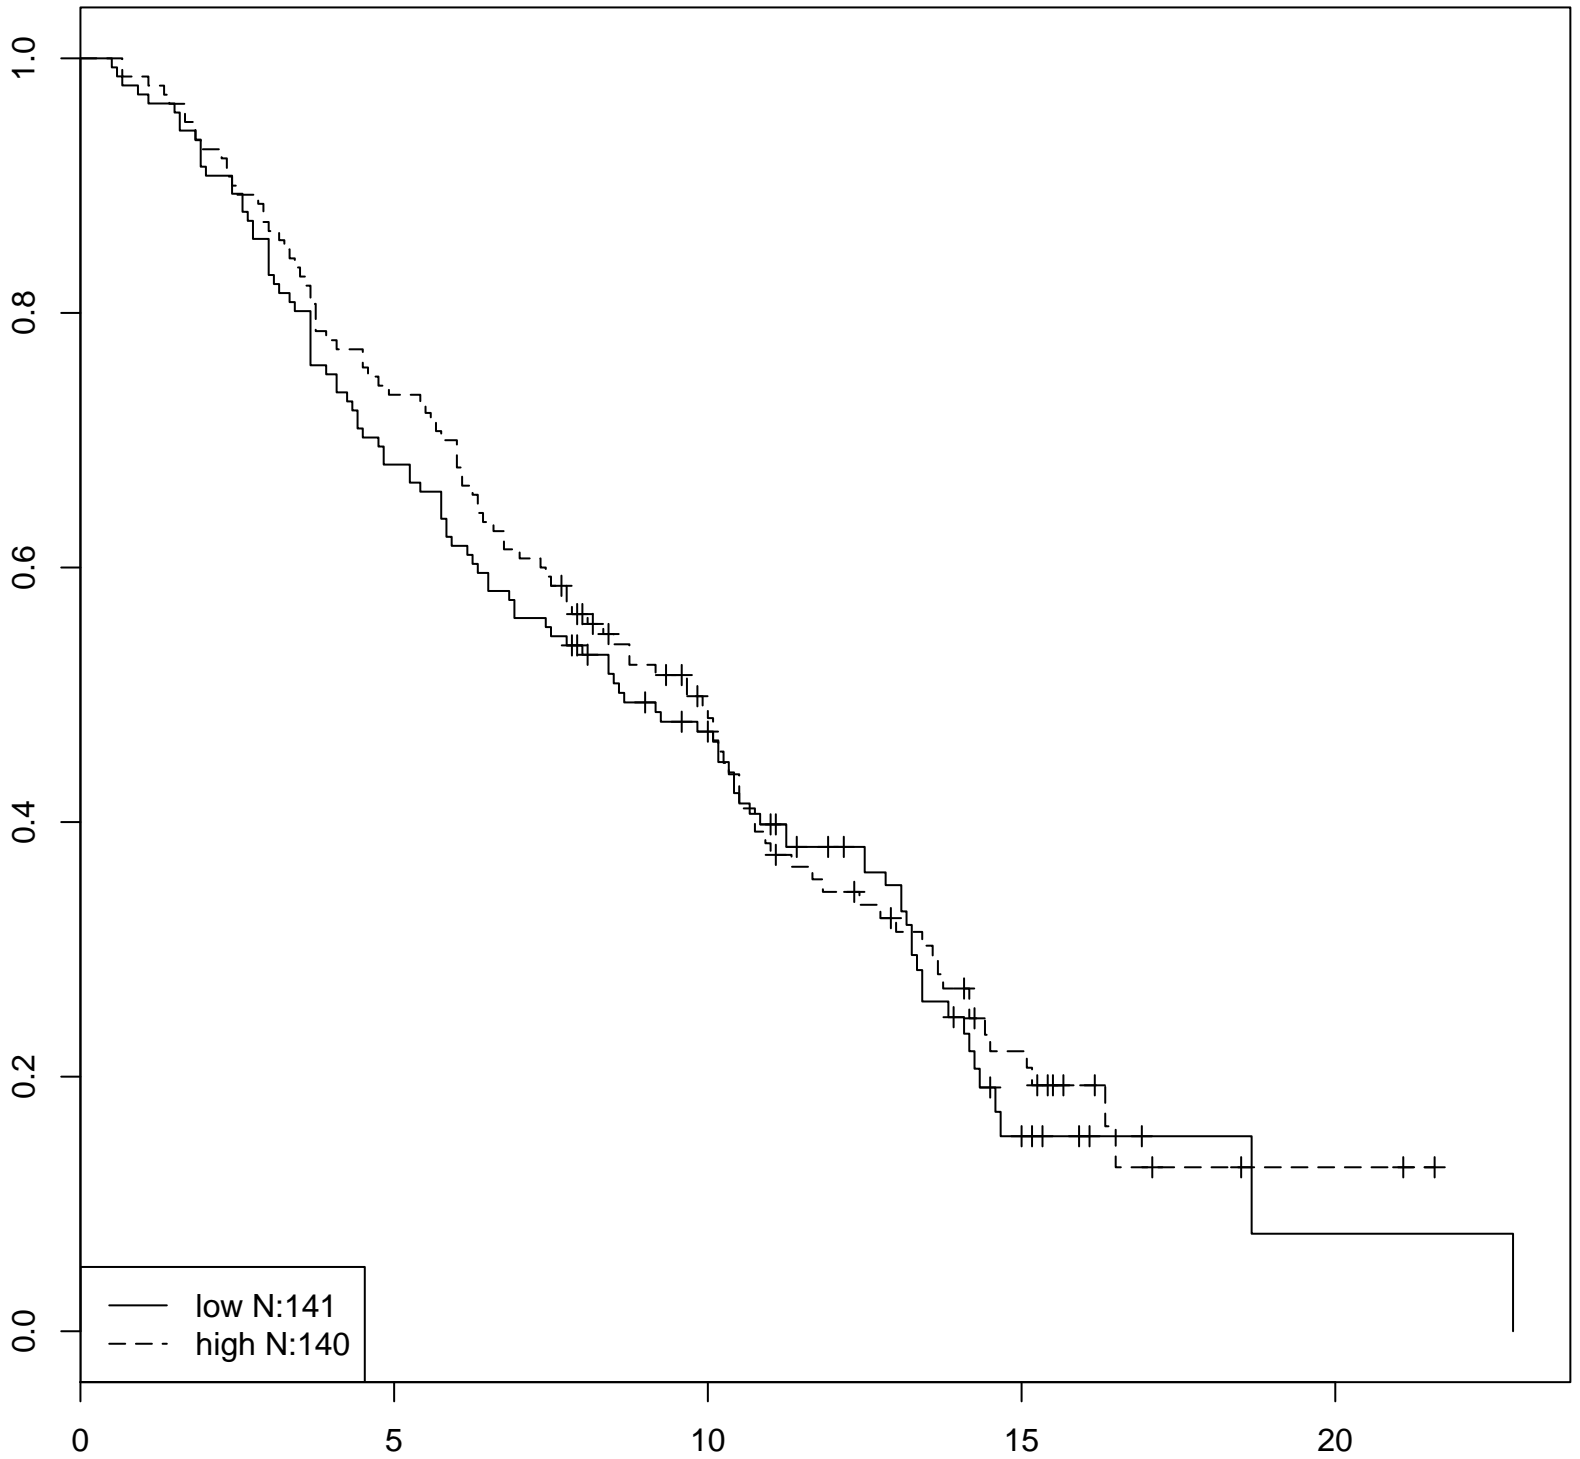

years

log-rank test p-value = 0.582

# Survival by TEAD1 expression

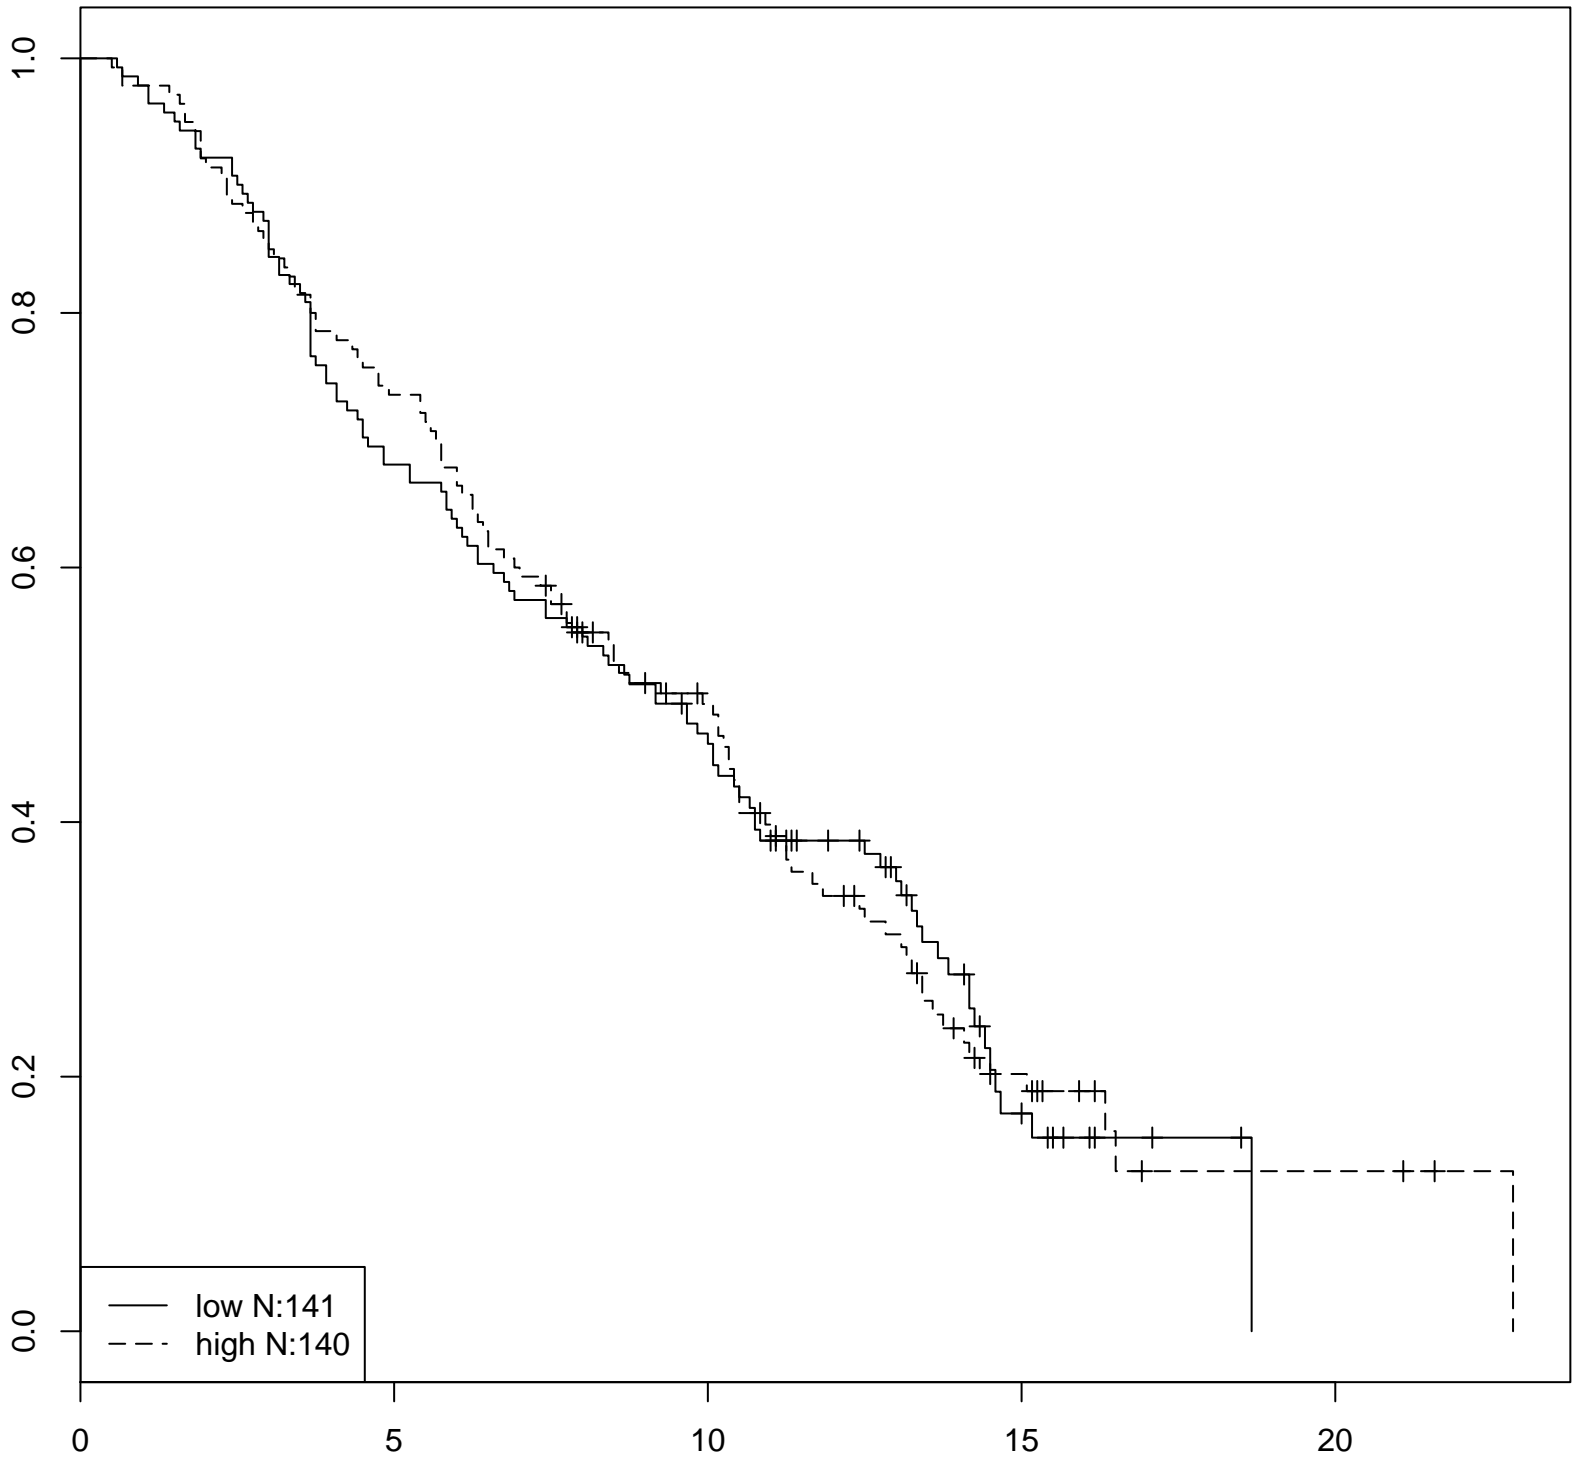

years

log-rank test p-value = 0.927

# Survival by TERT expression

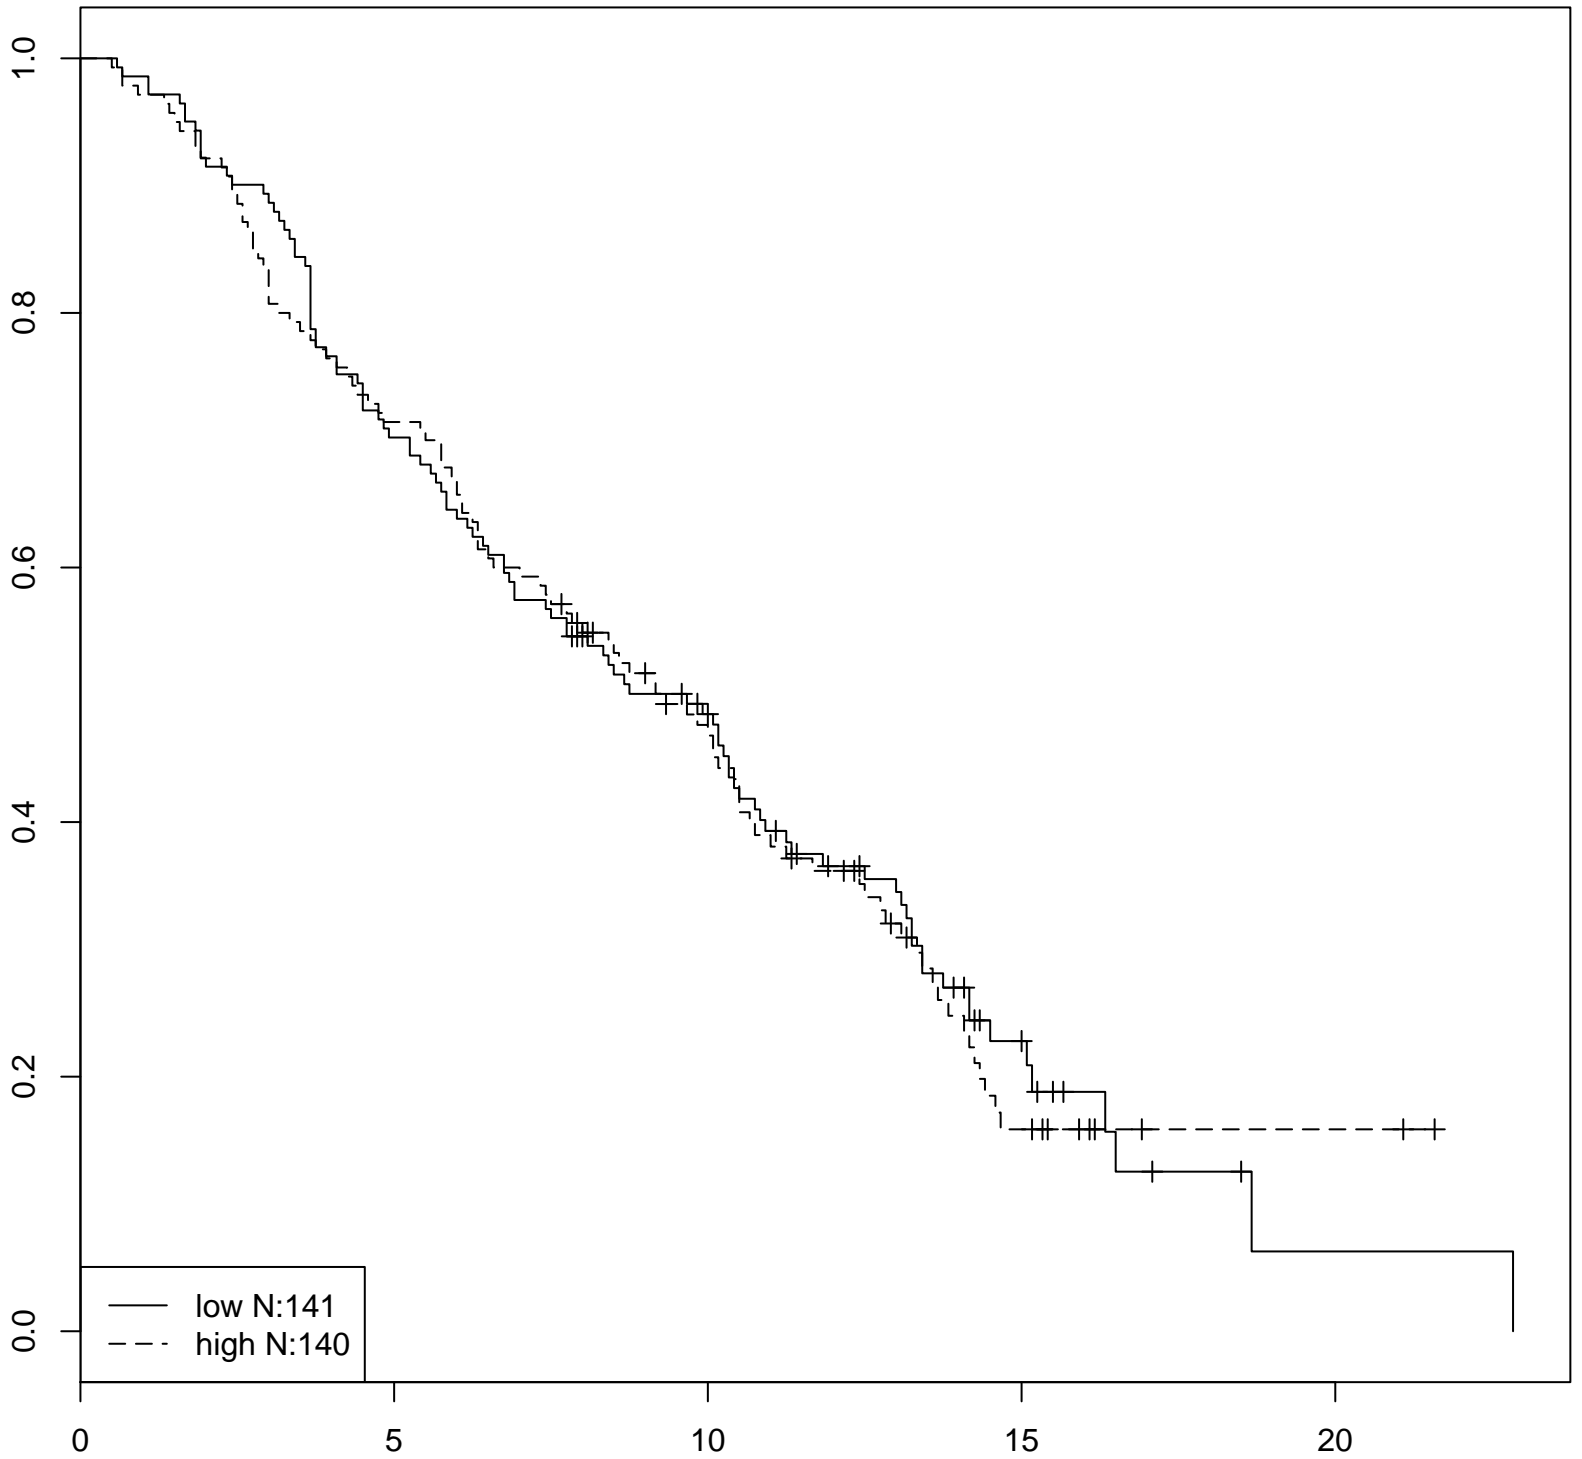

# Survival by TFF3 expression

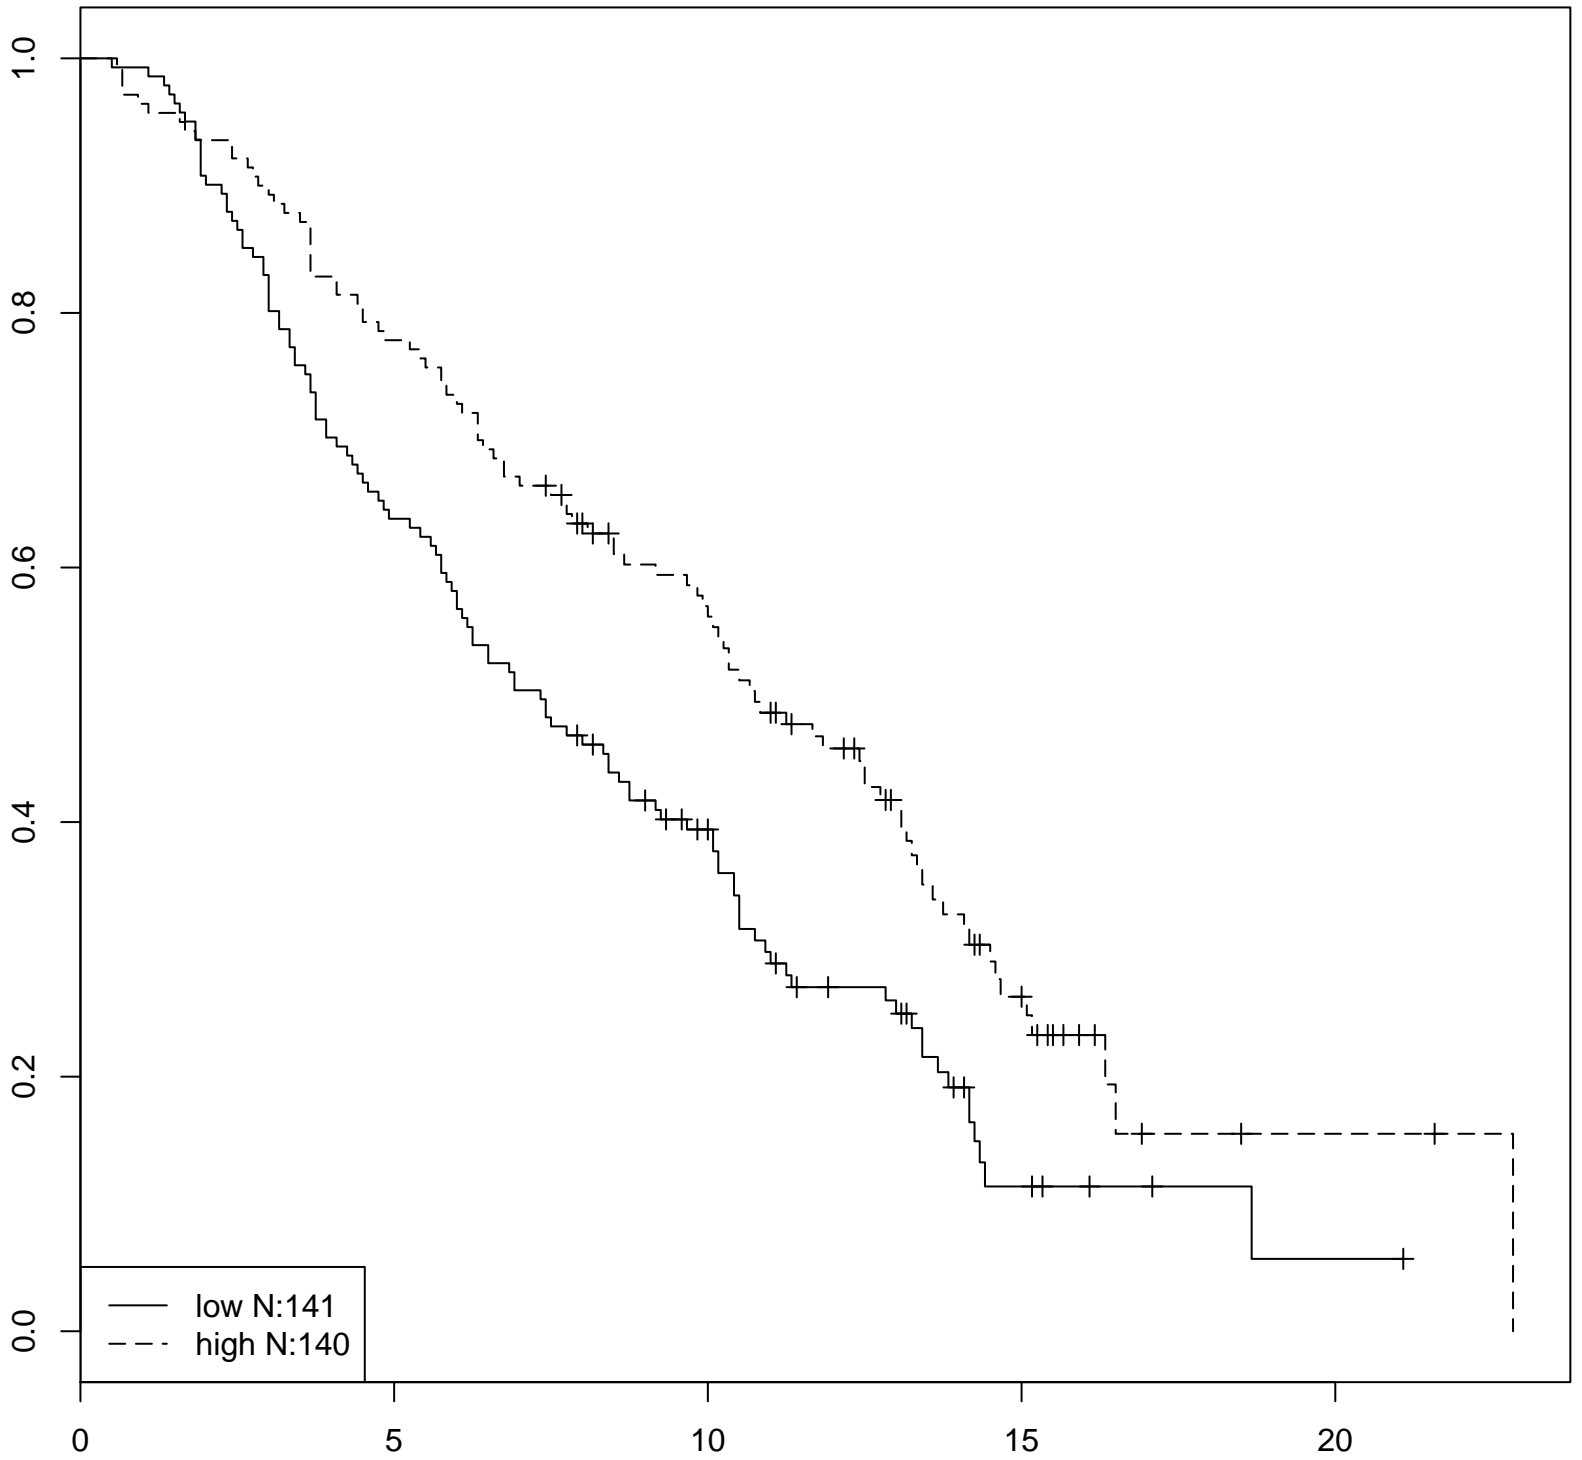

years

log-rank test p-value = 0.001

# Survival by TGFB1 expression

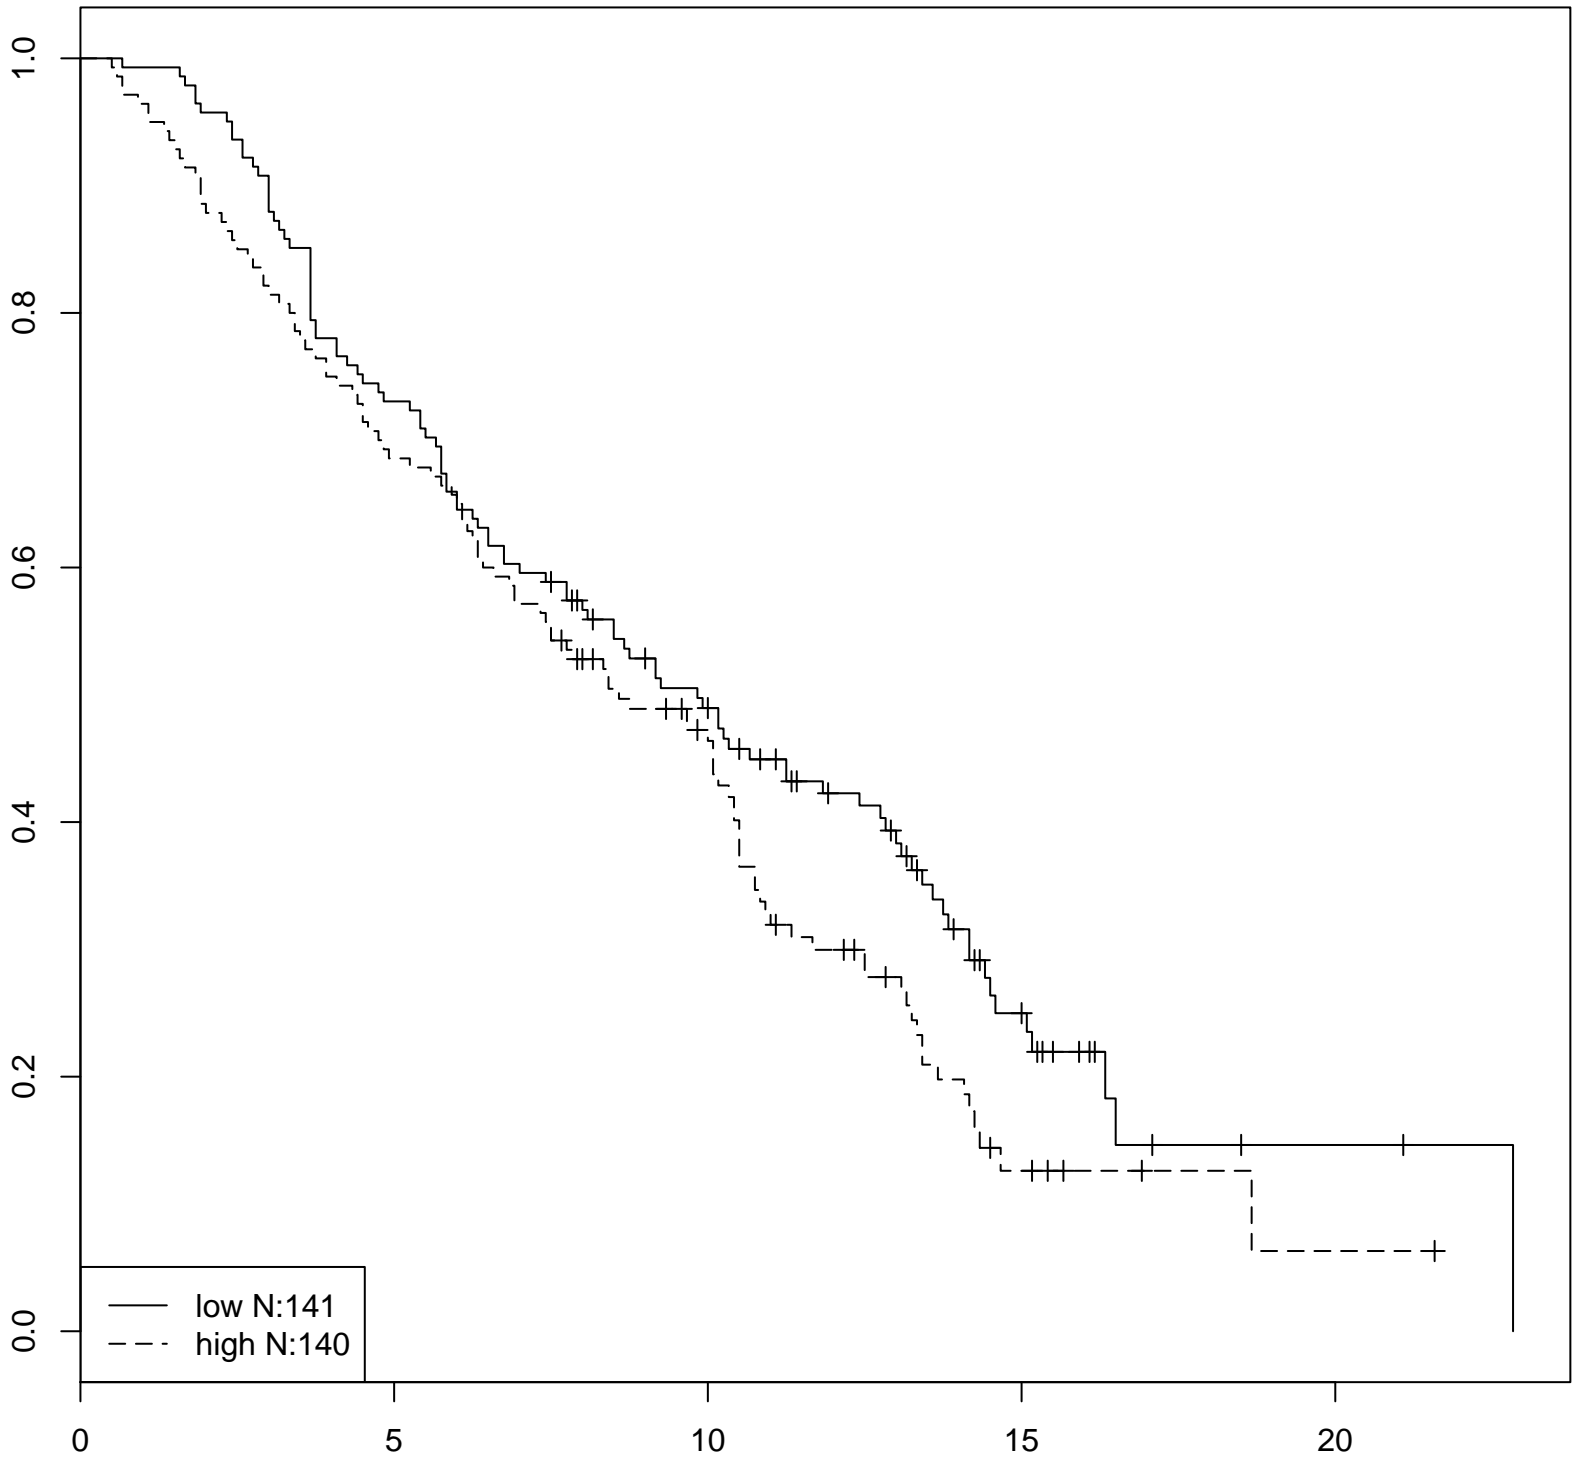

log-rank test p-value = 0.062

# Survival by TGFB2 expression

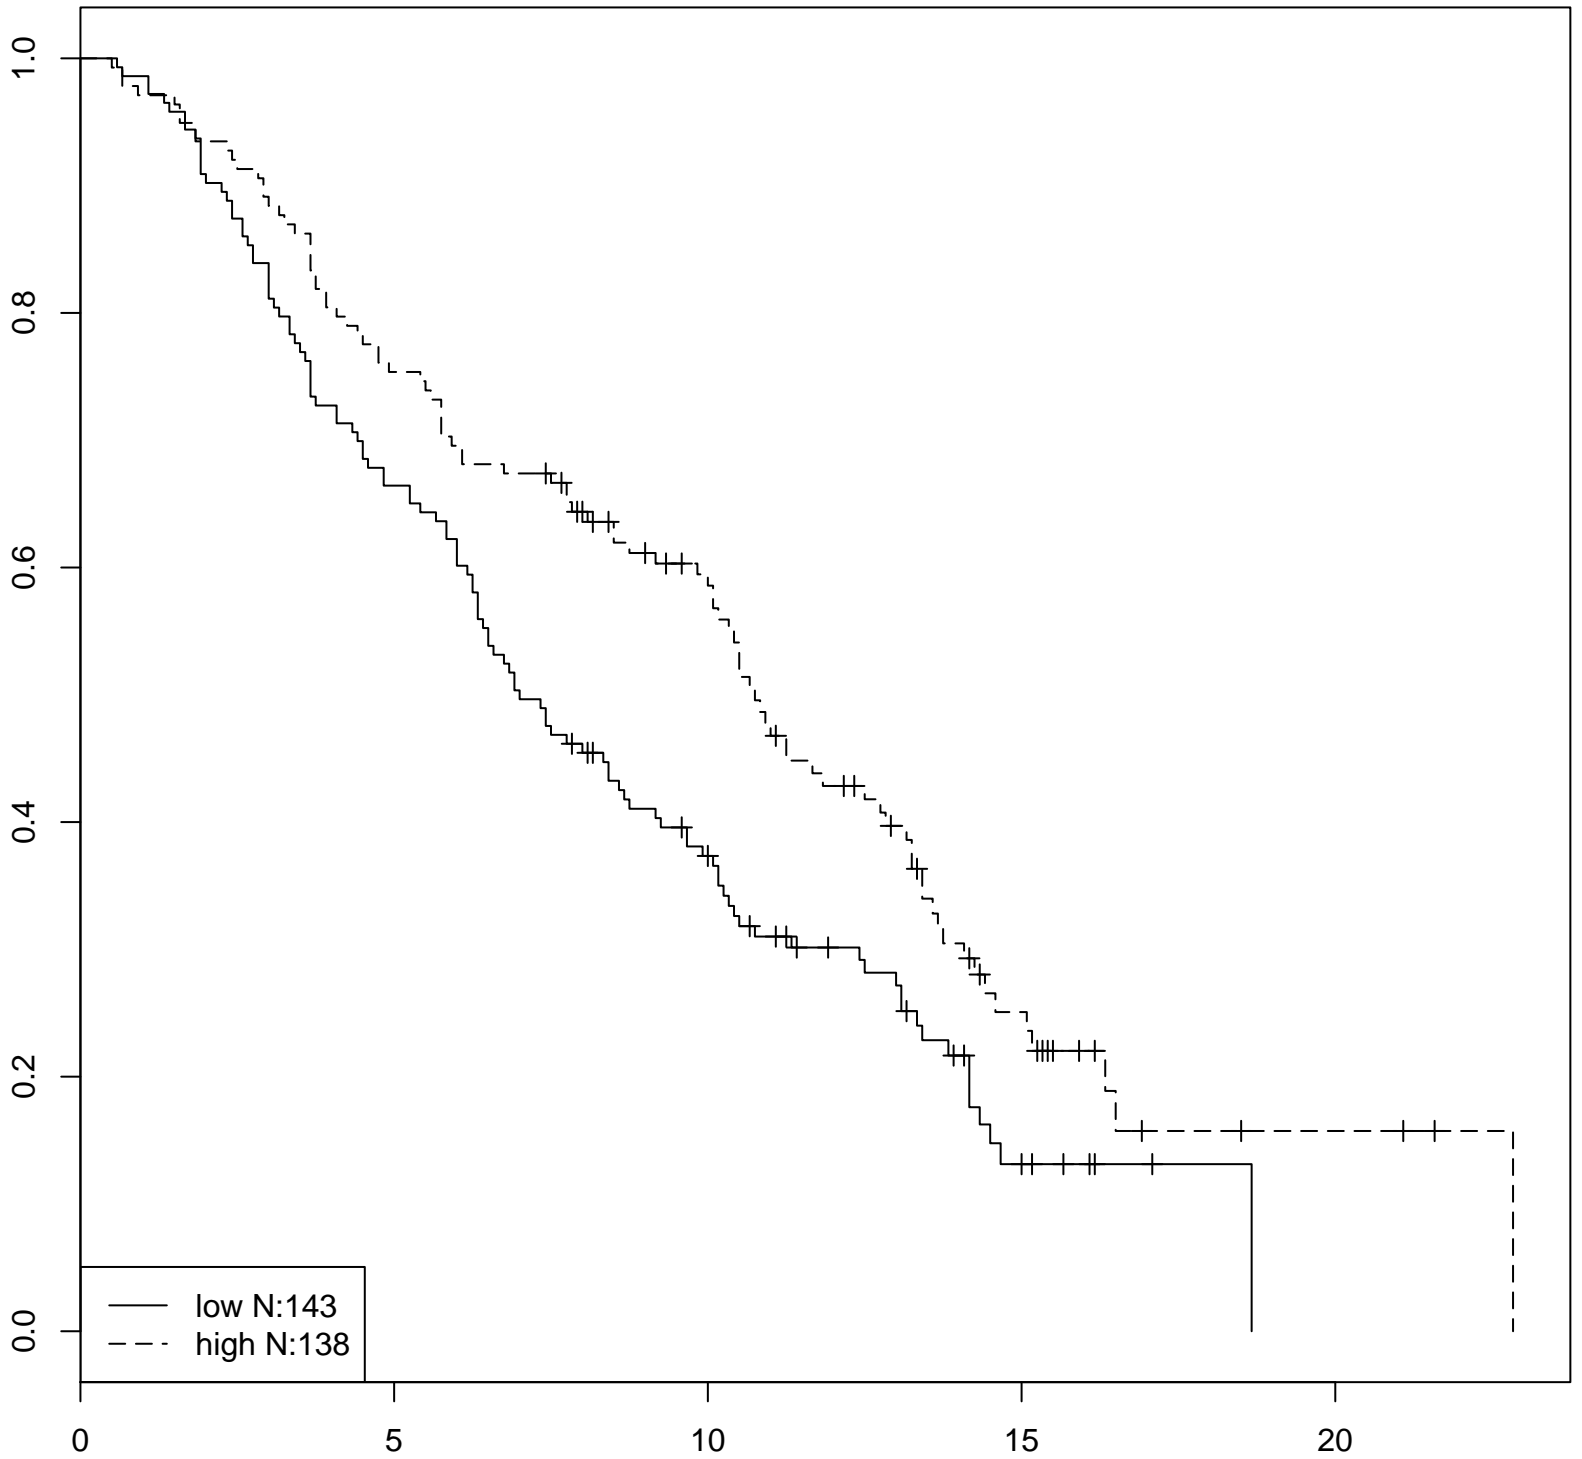

years

log-rank test p-value = 0.004

# Survival by THBS1 expression

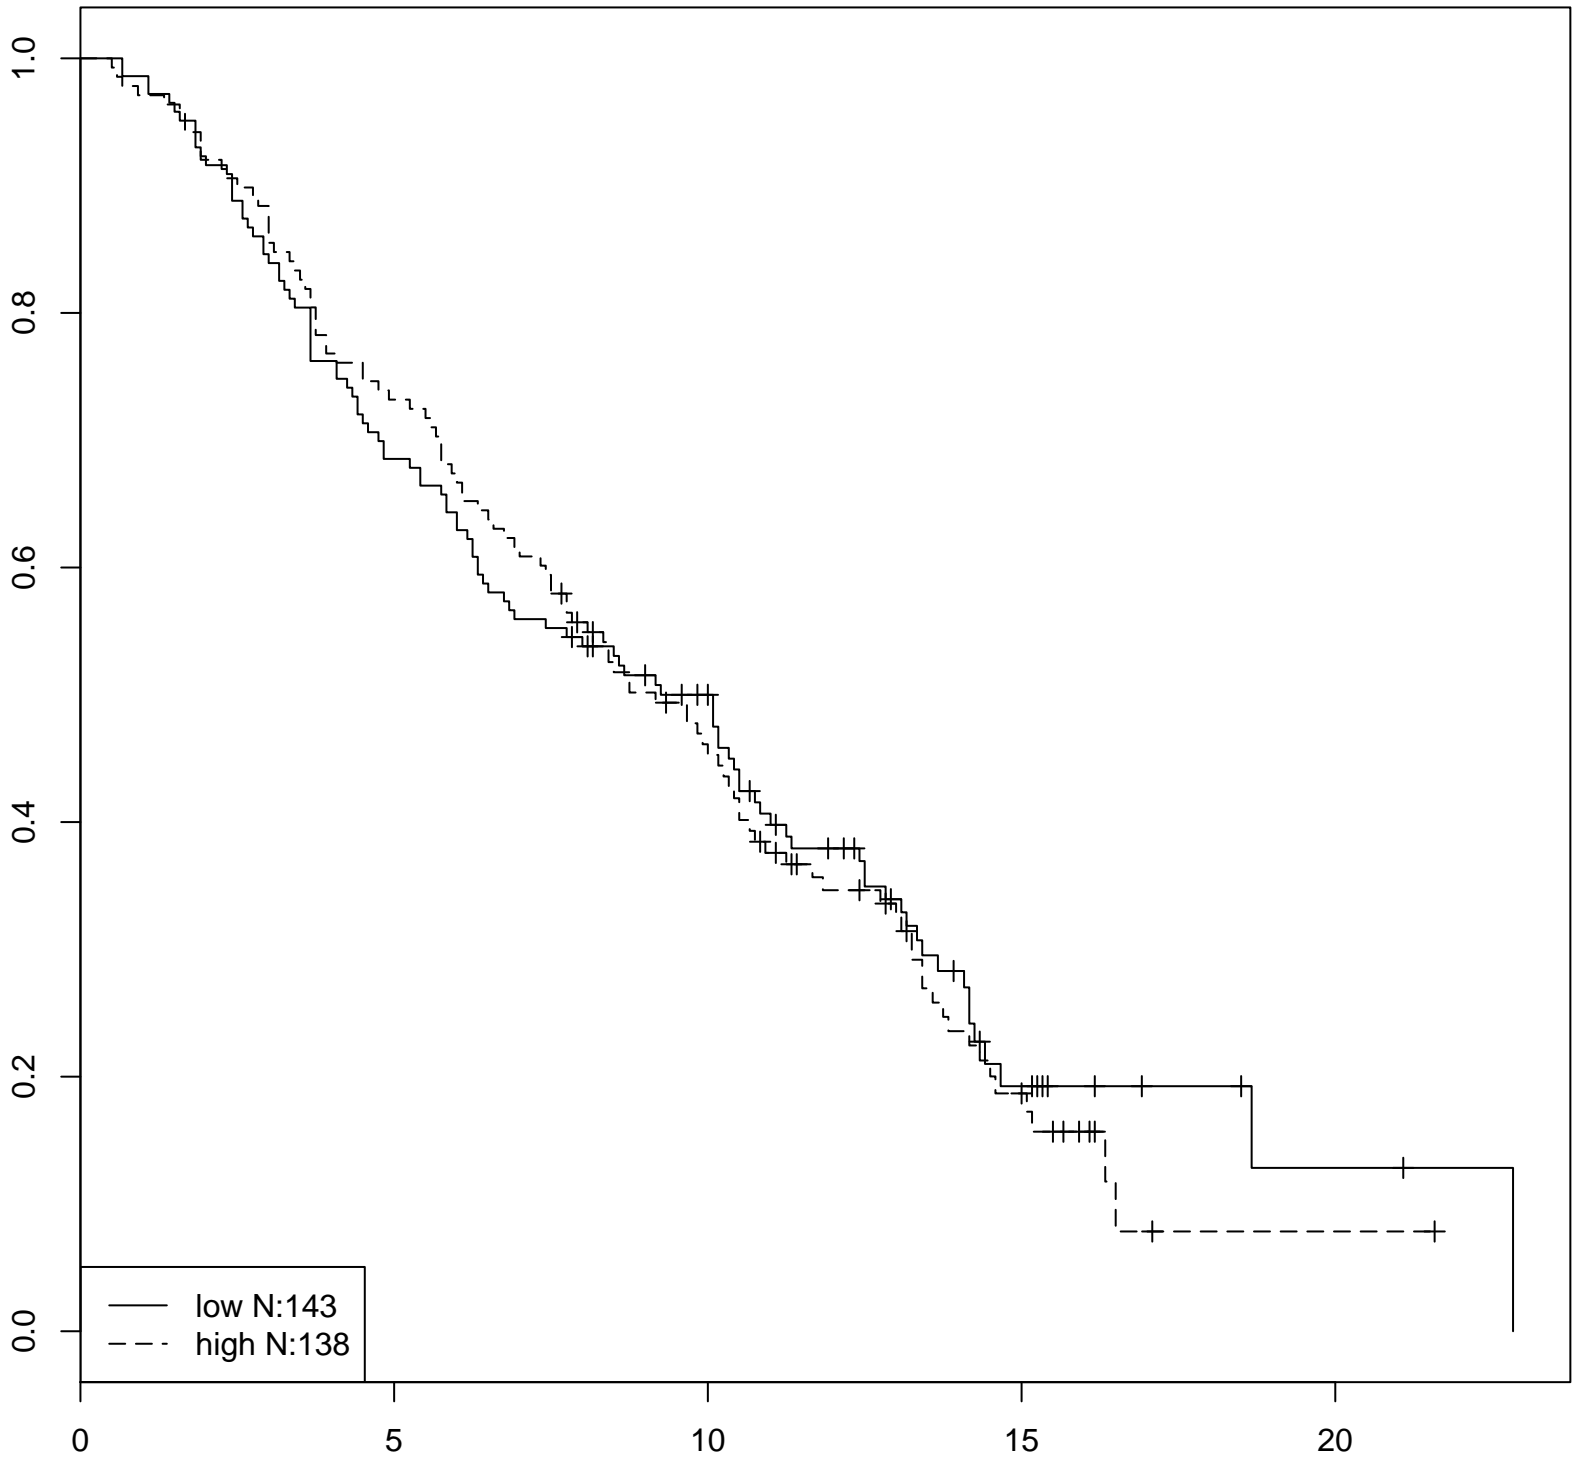

# Survival by TIMP1 expression

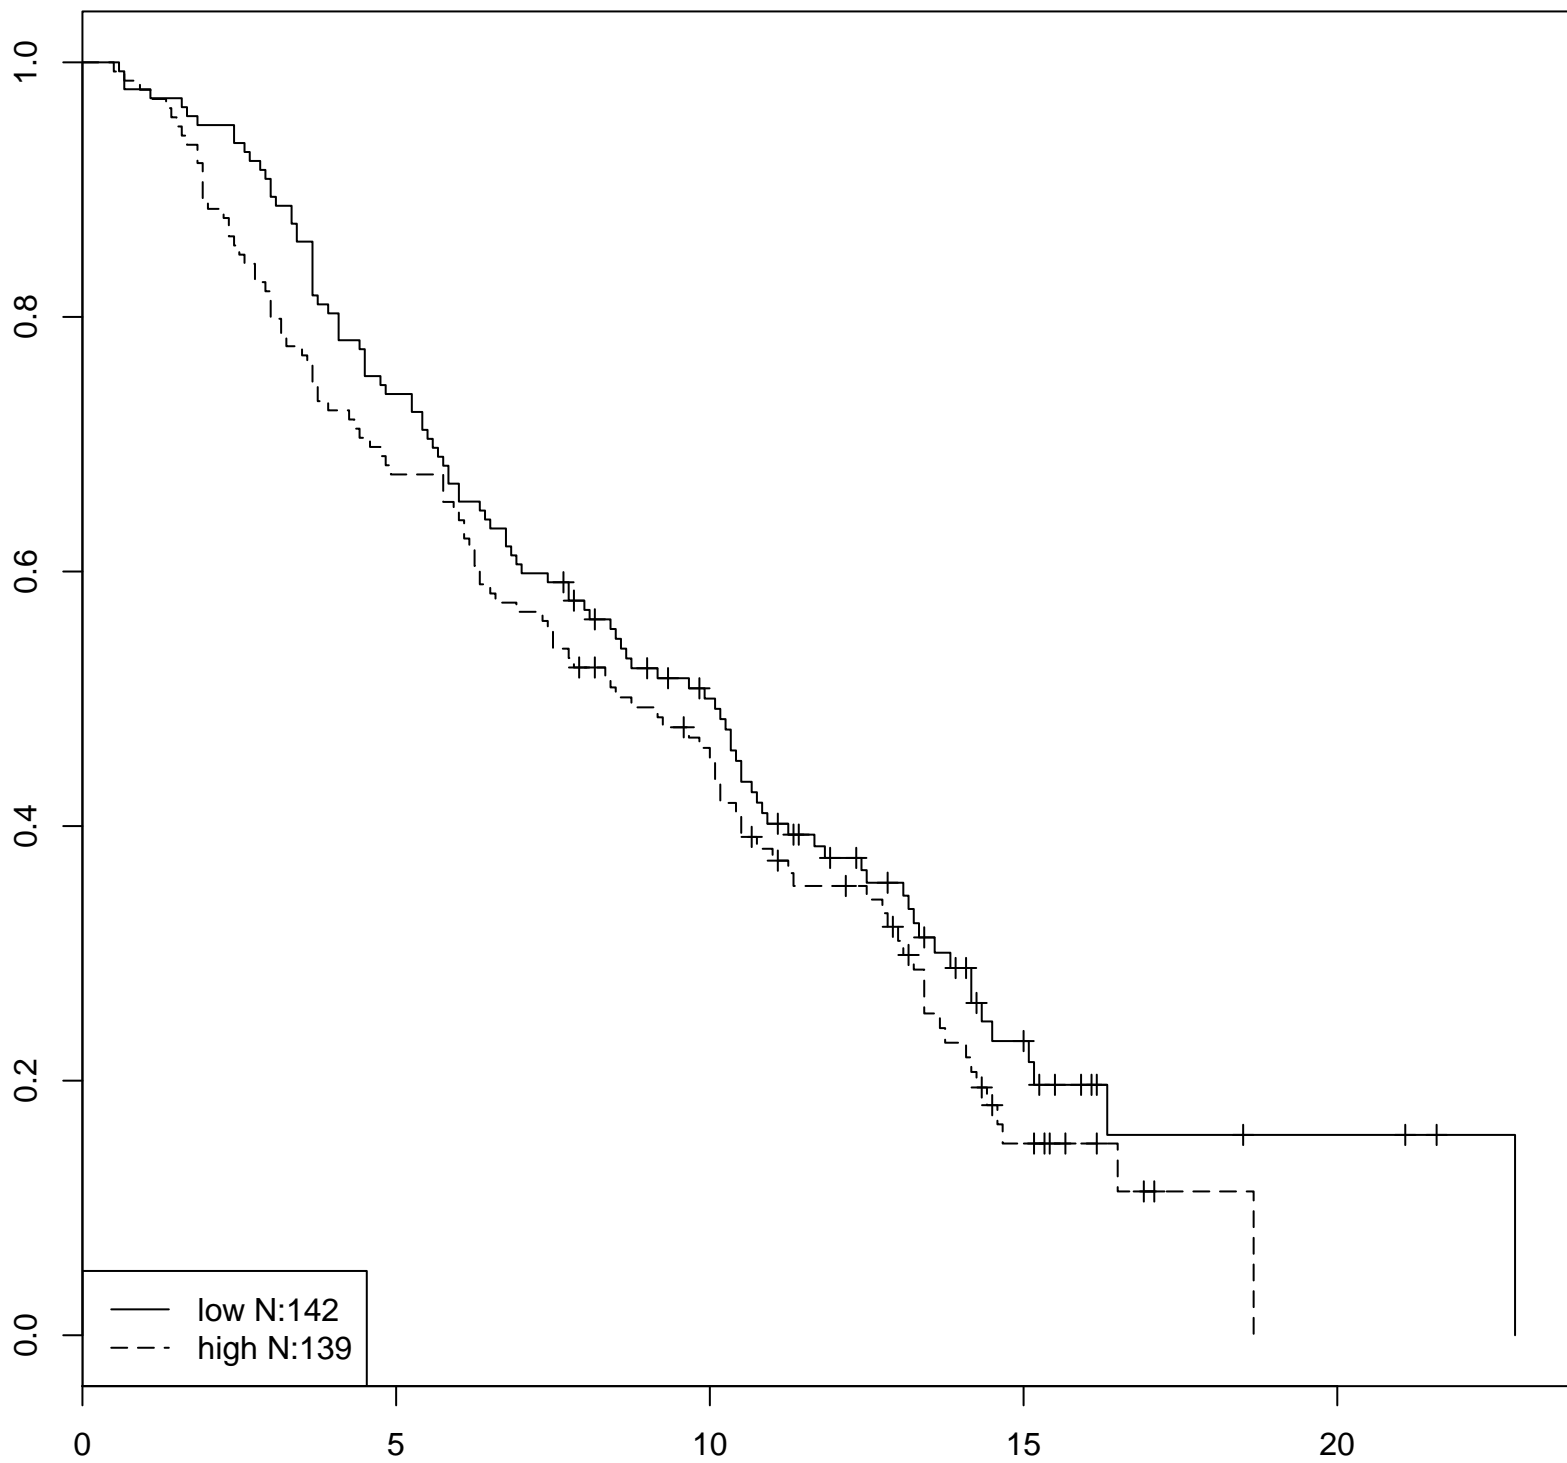



# Survival by TIMP2 expression

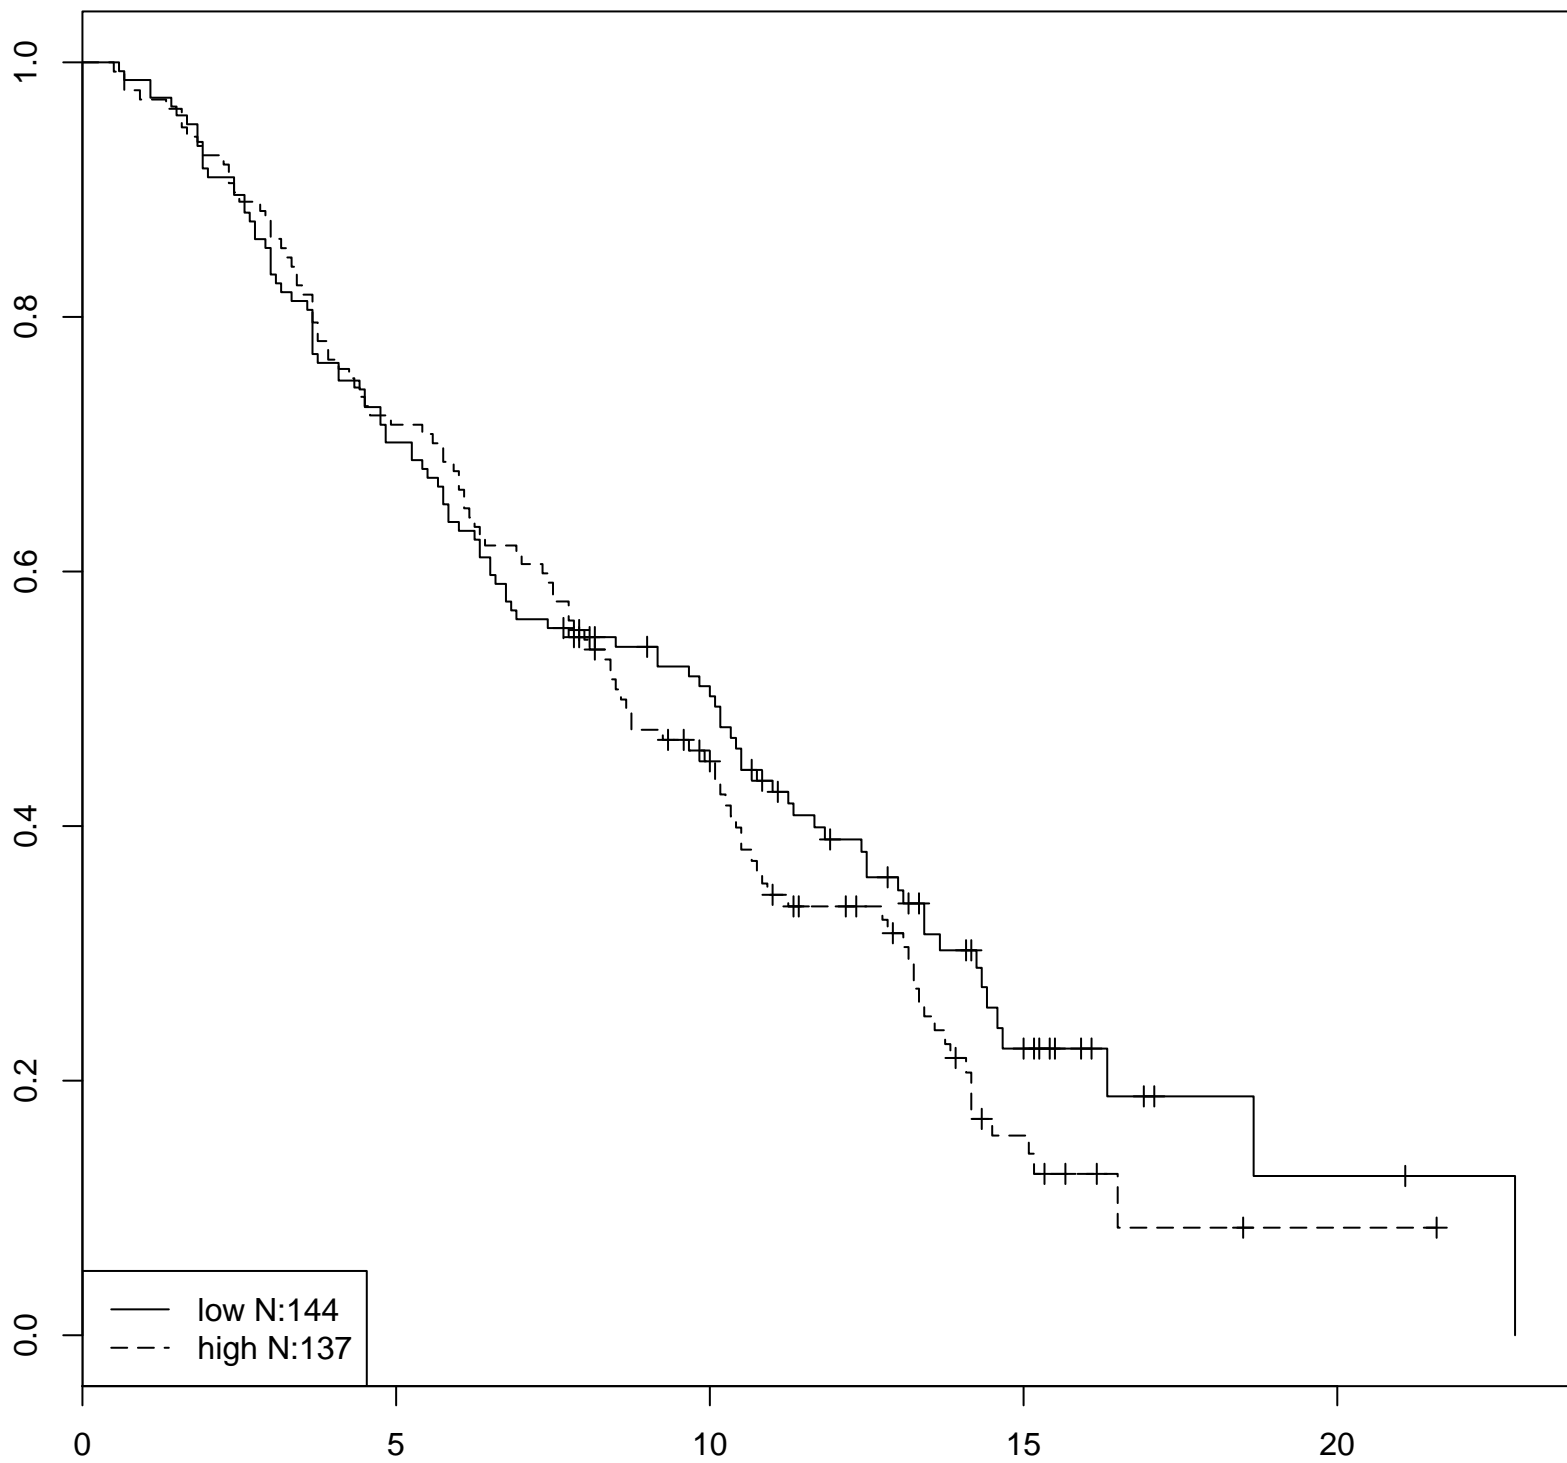

log-rank test p-value = 0.242

# Survival by TIMP4 expression

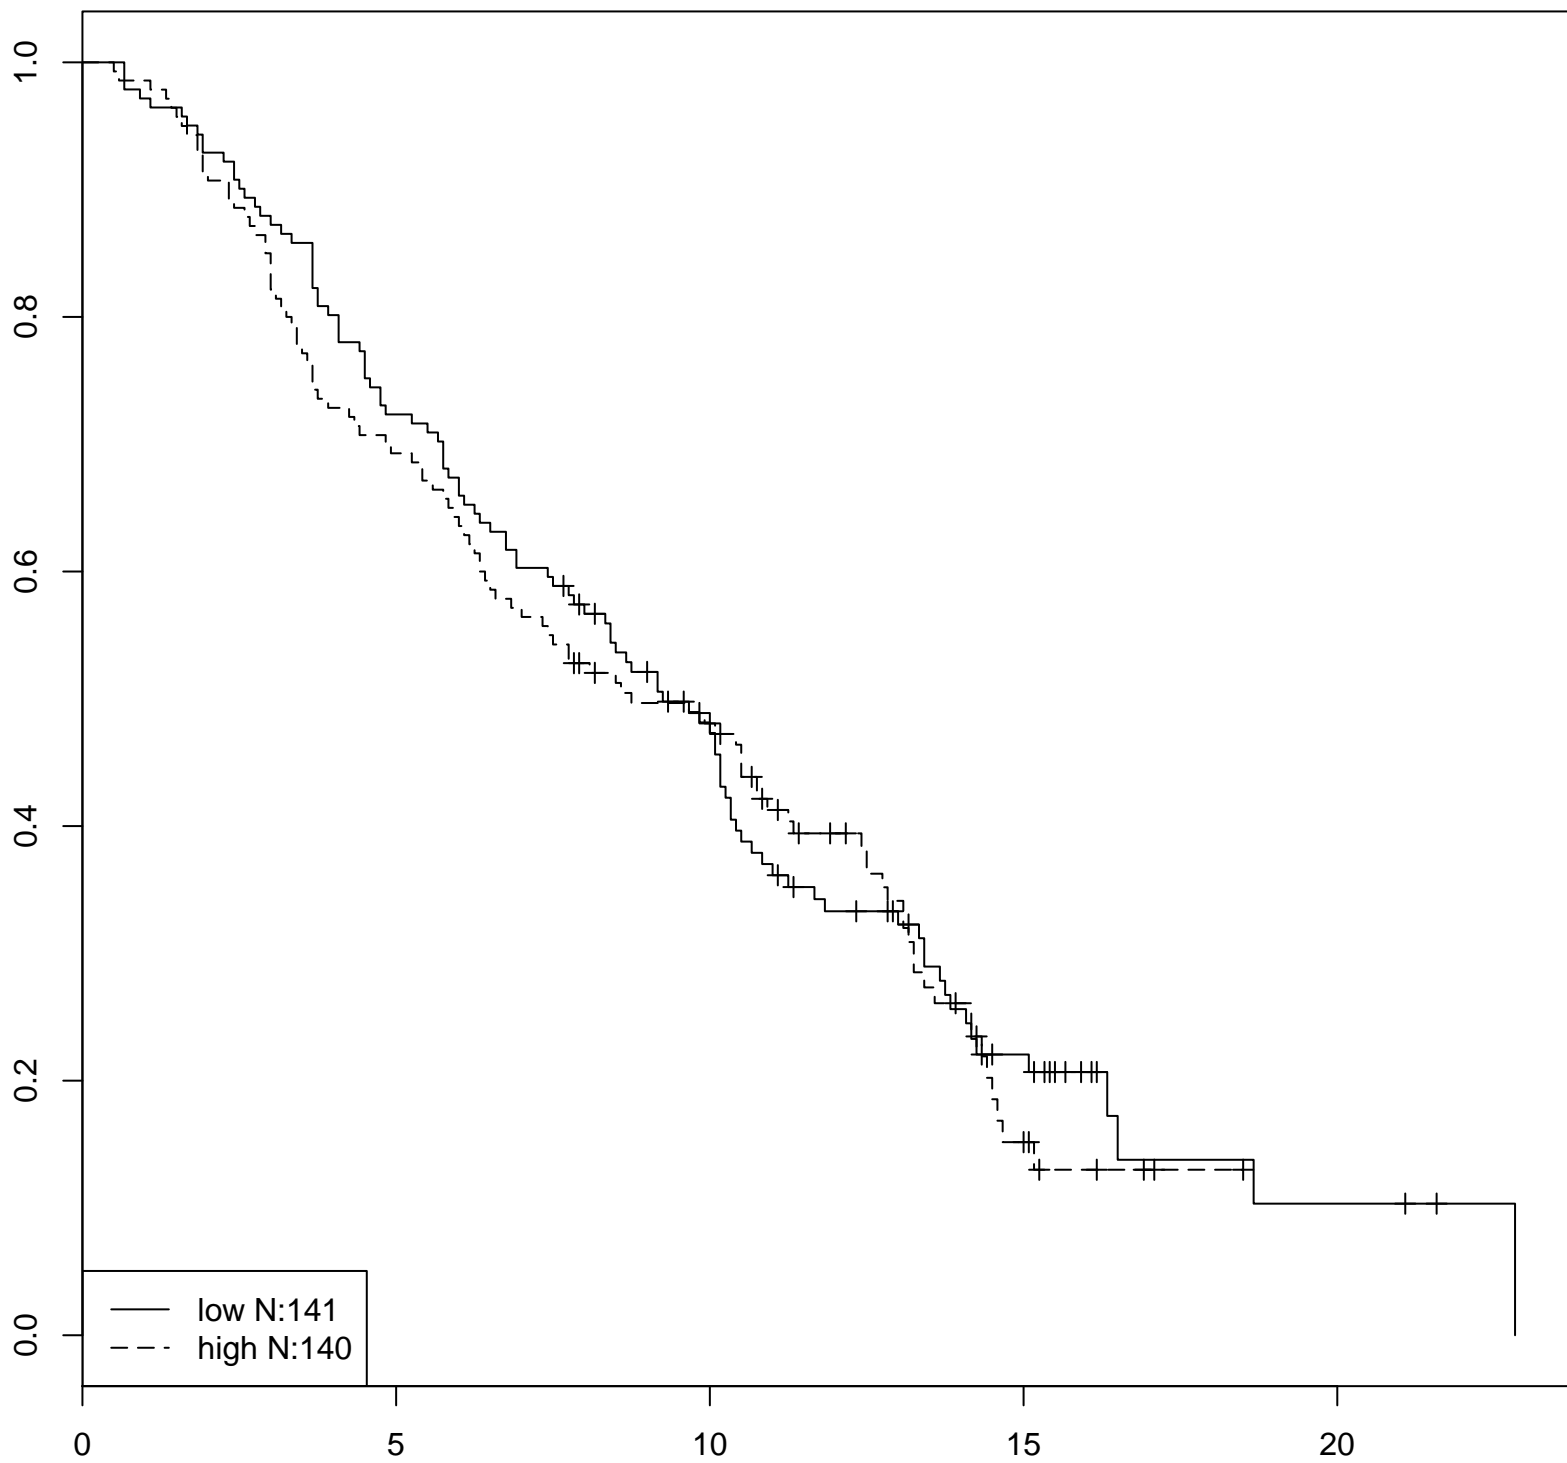

years

log-rank test p-value = 0.691

# Survival by TNFRSF11B expression

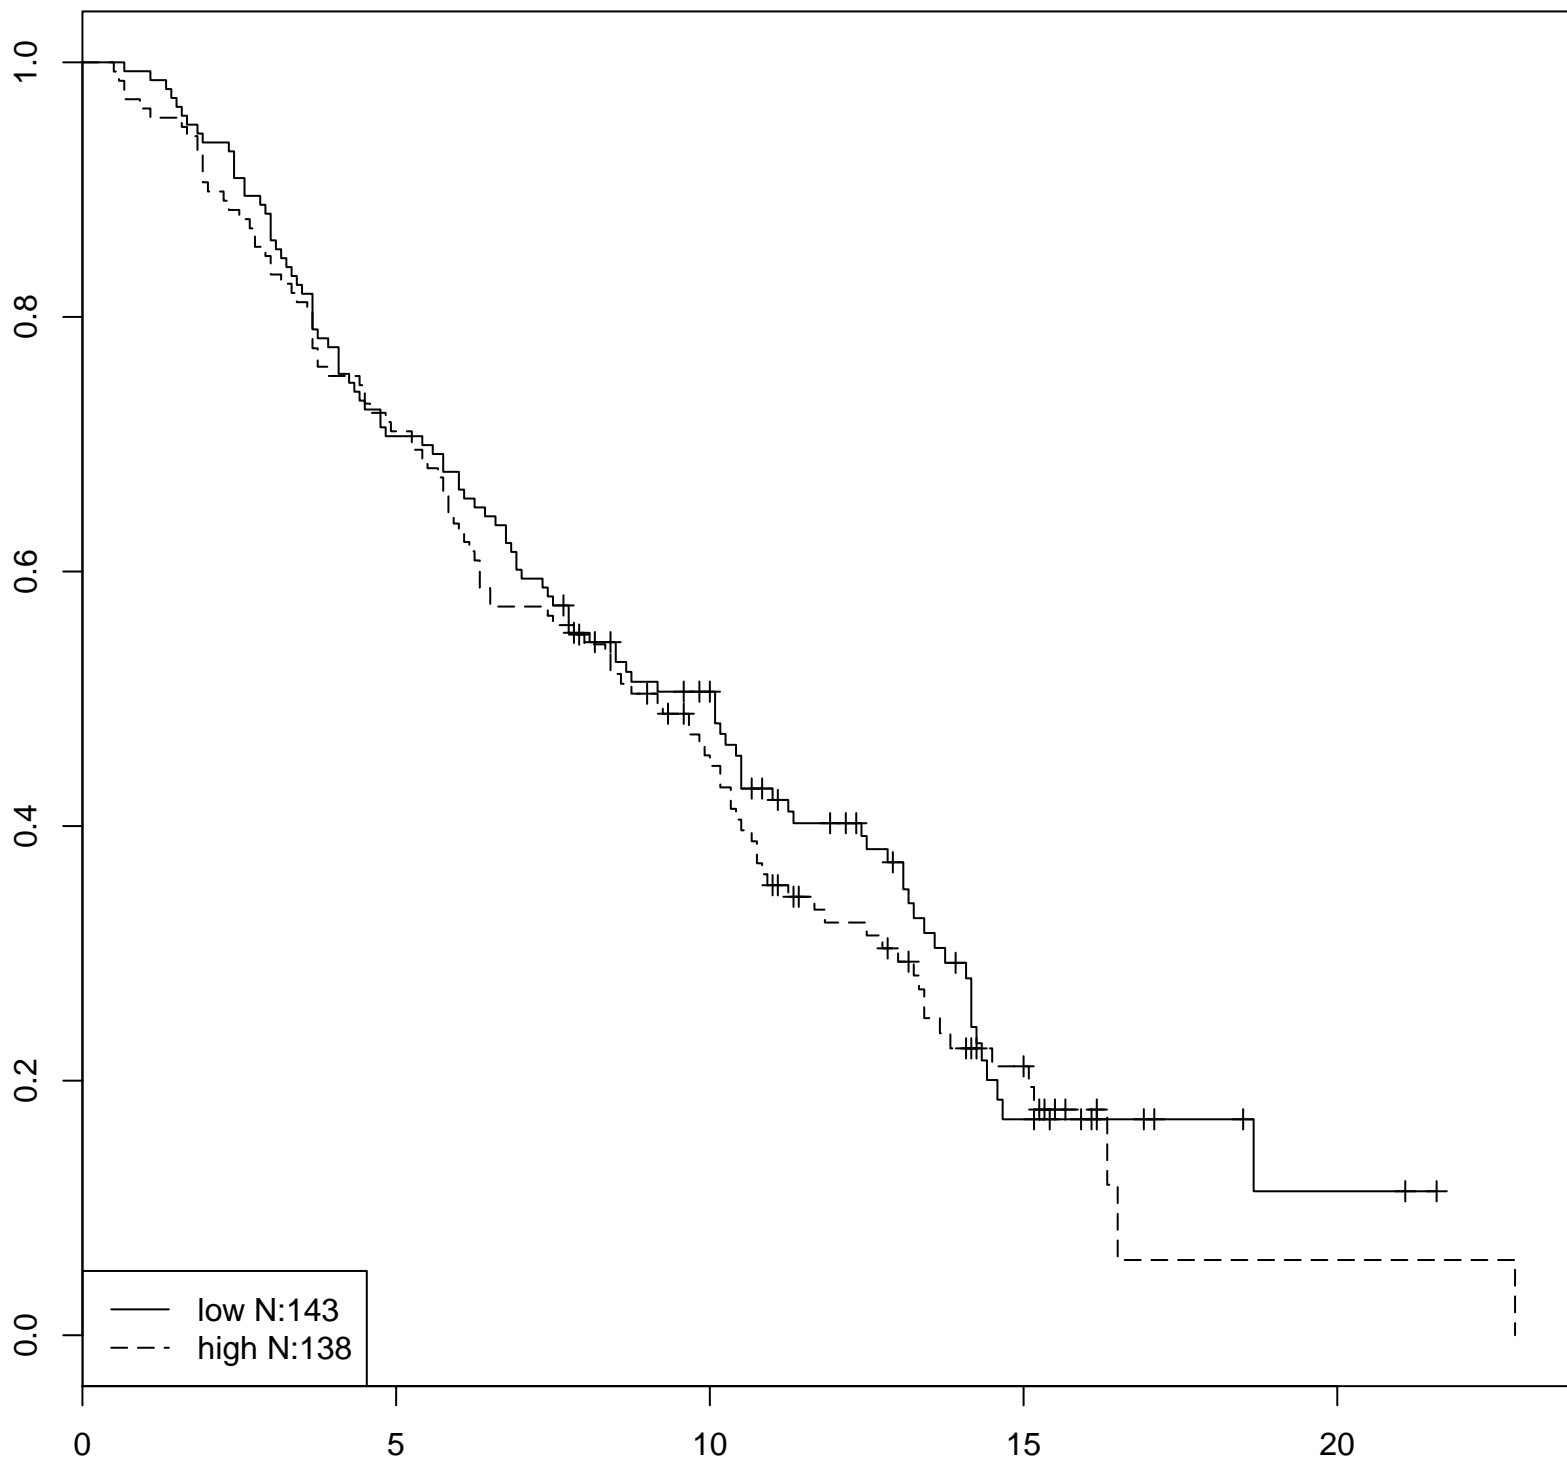

# Survival by TNFRSF1A expression

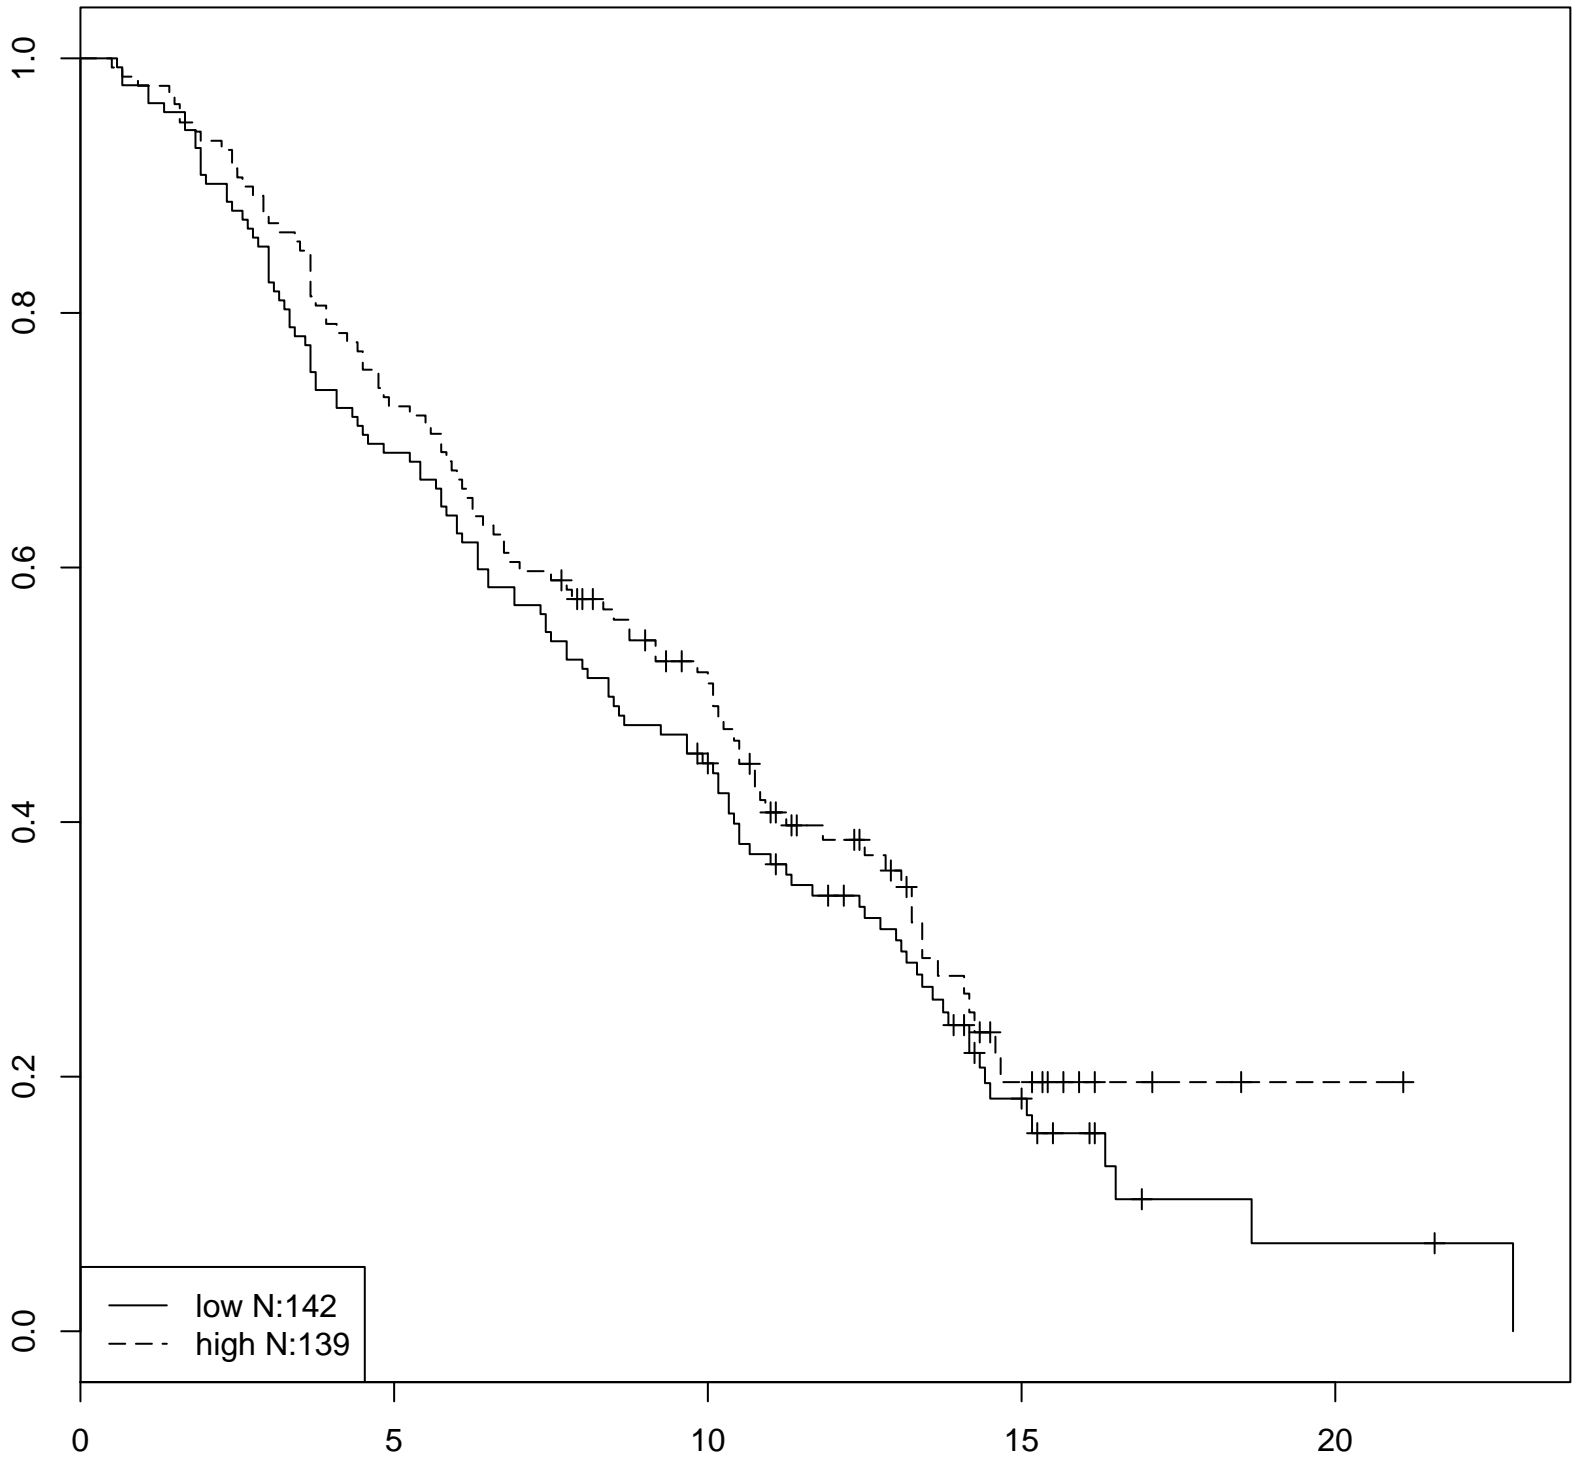

years

log-rank test p-value = 0.257

# Survival by TNFRSF25 expression

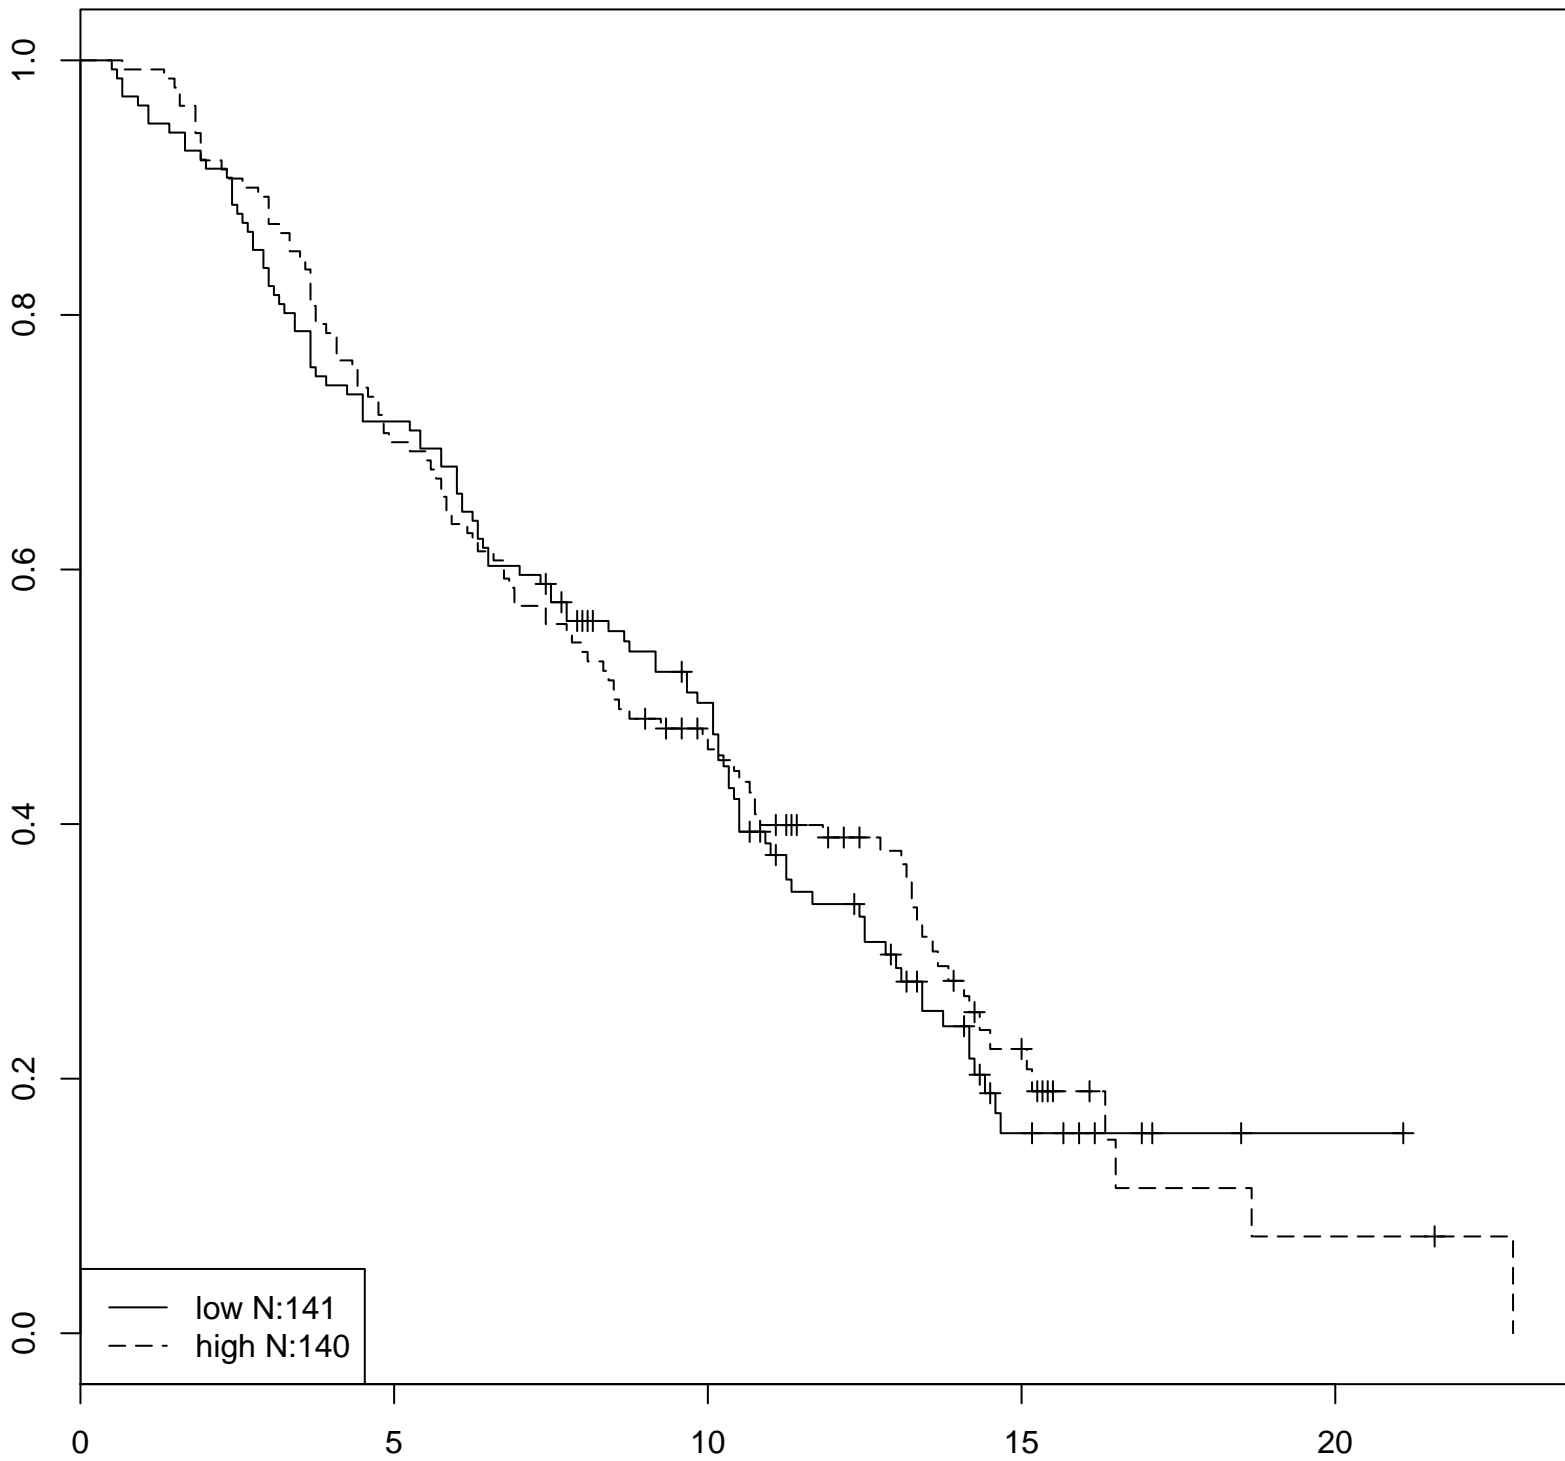

# Survival by TOP2A expression

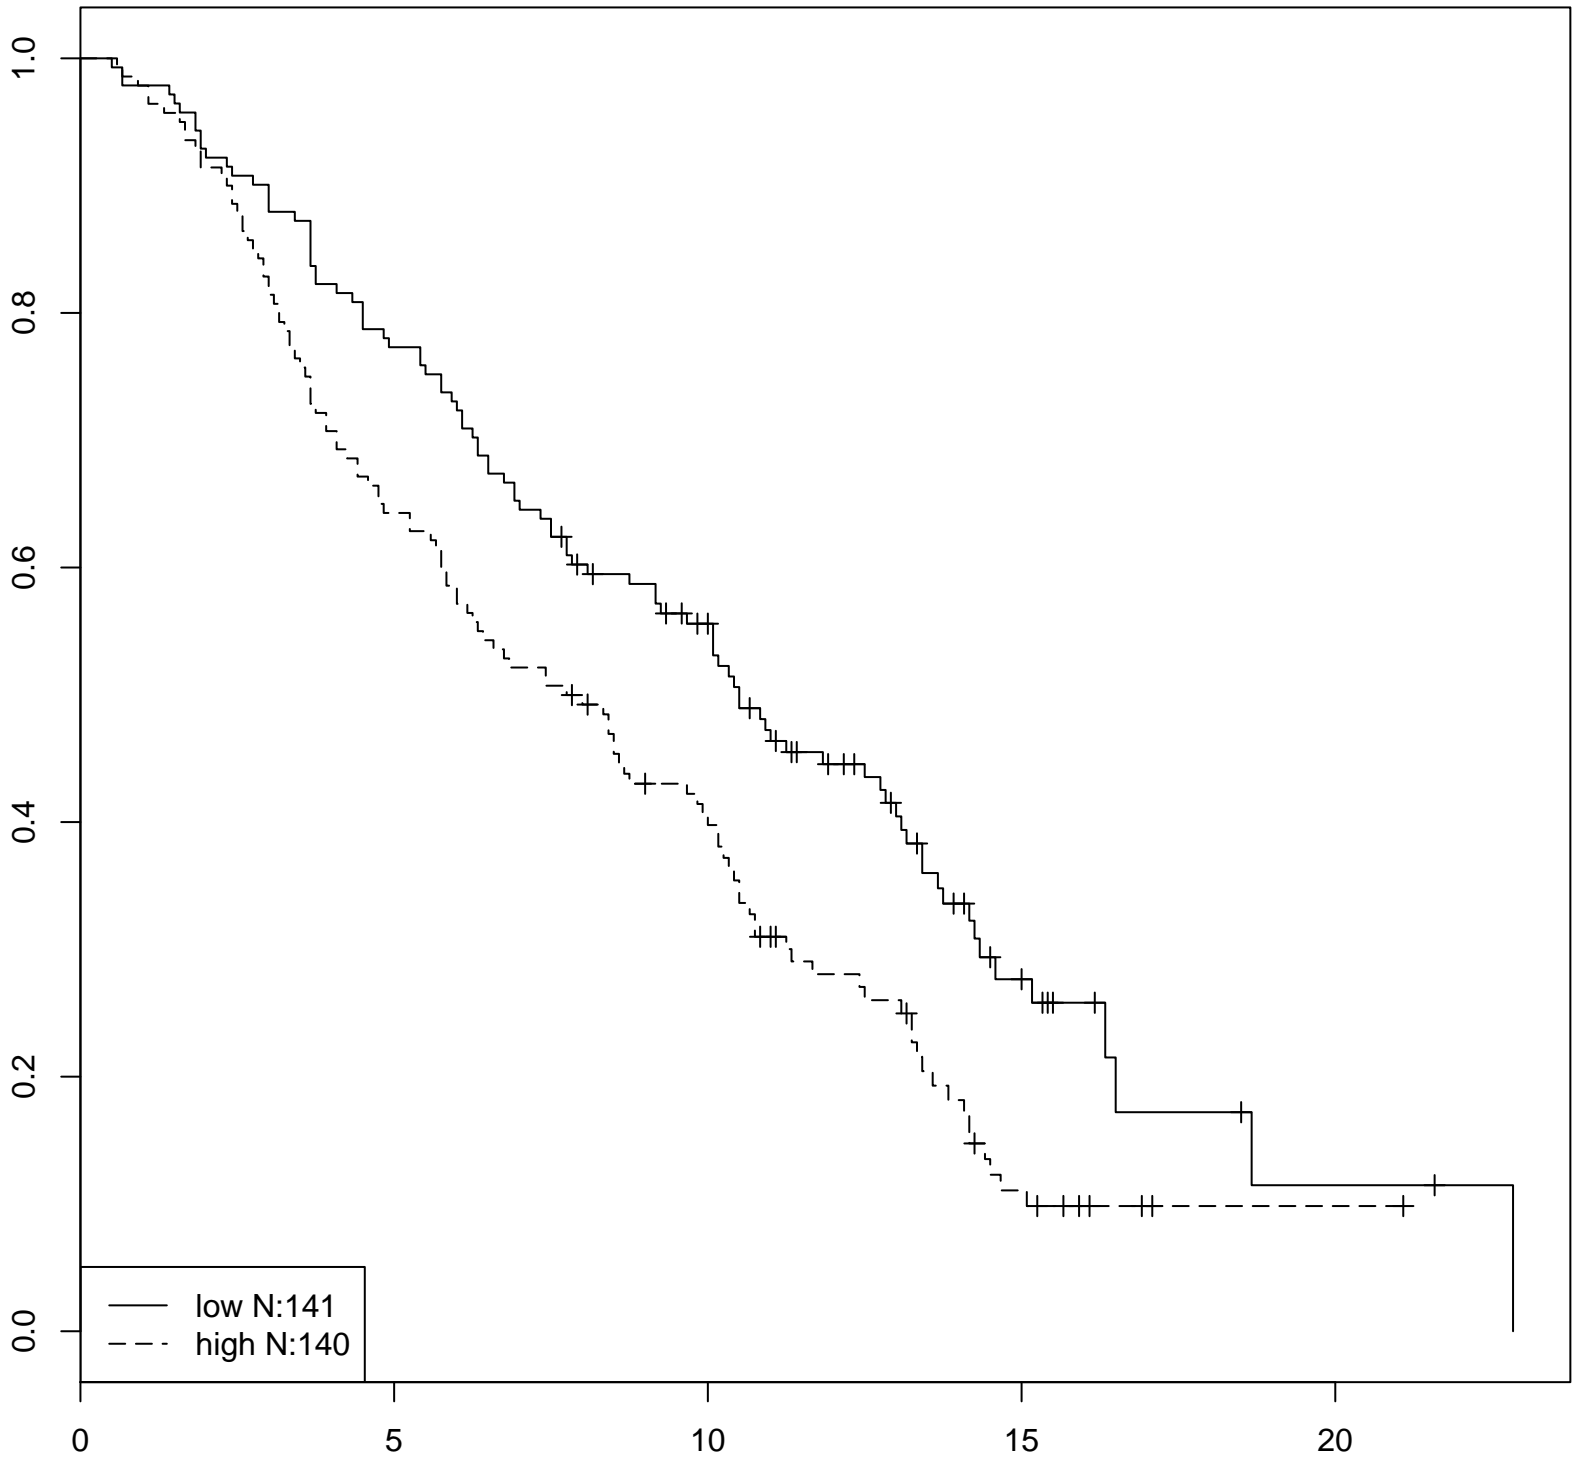

years

log-rank test p-value = 0.002

# Survival by TP53 expression

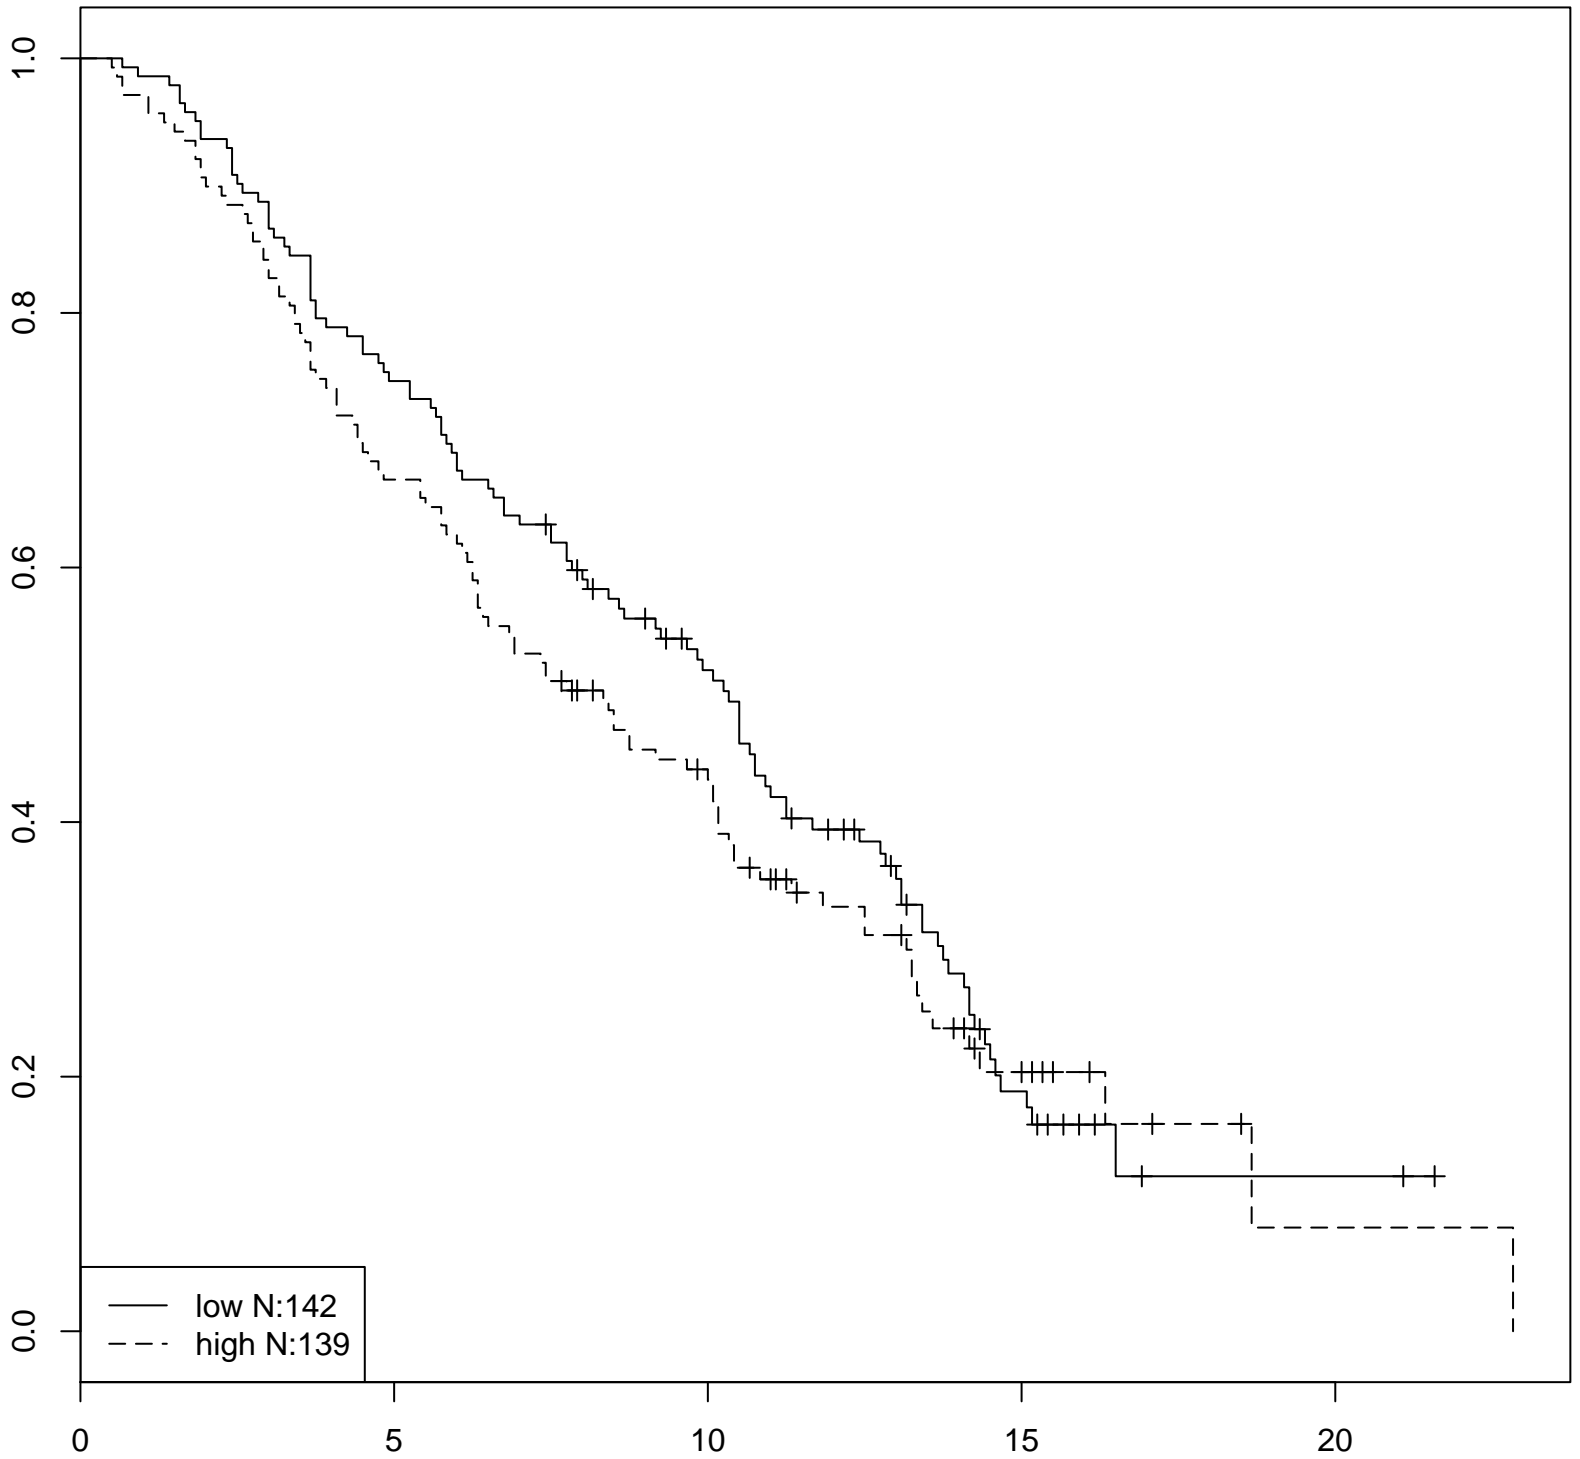

# Survival by TRPM8 expression

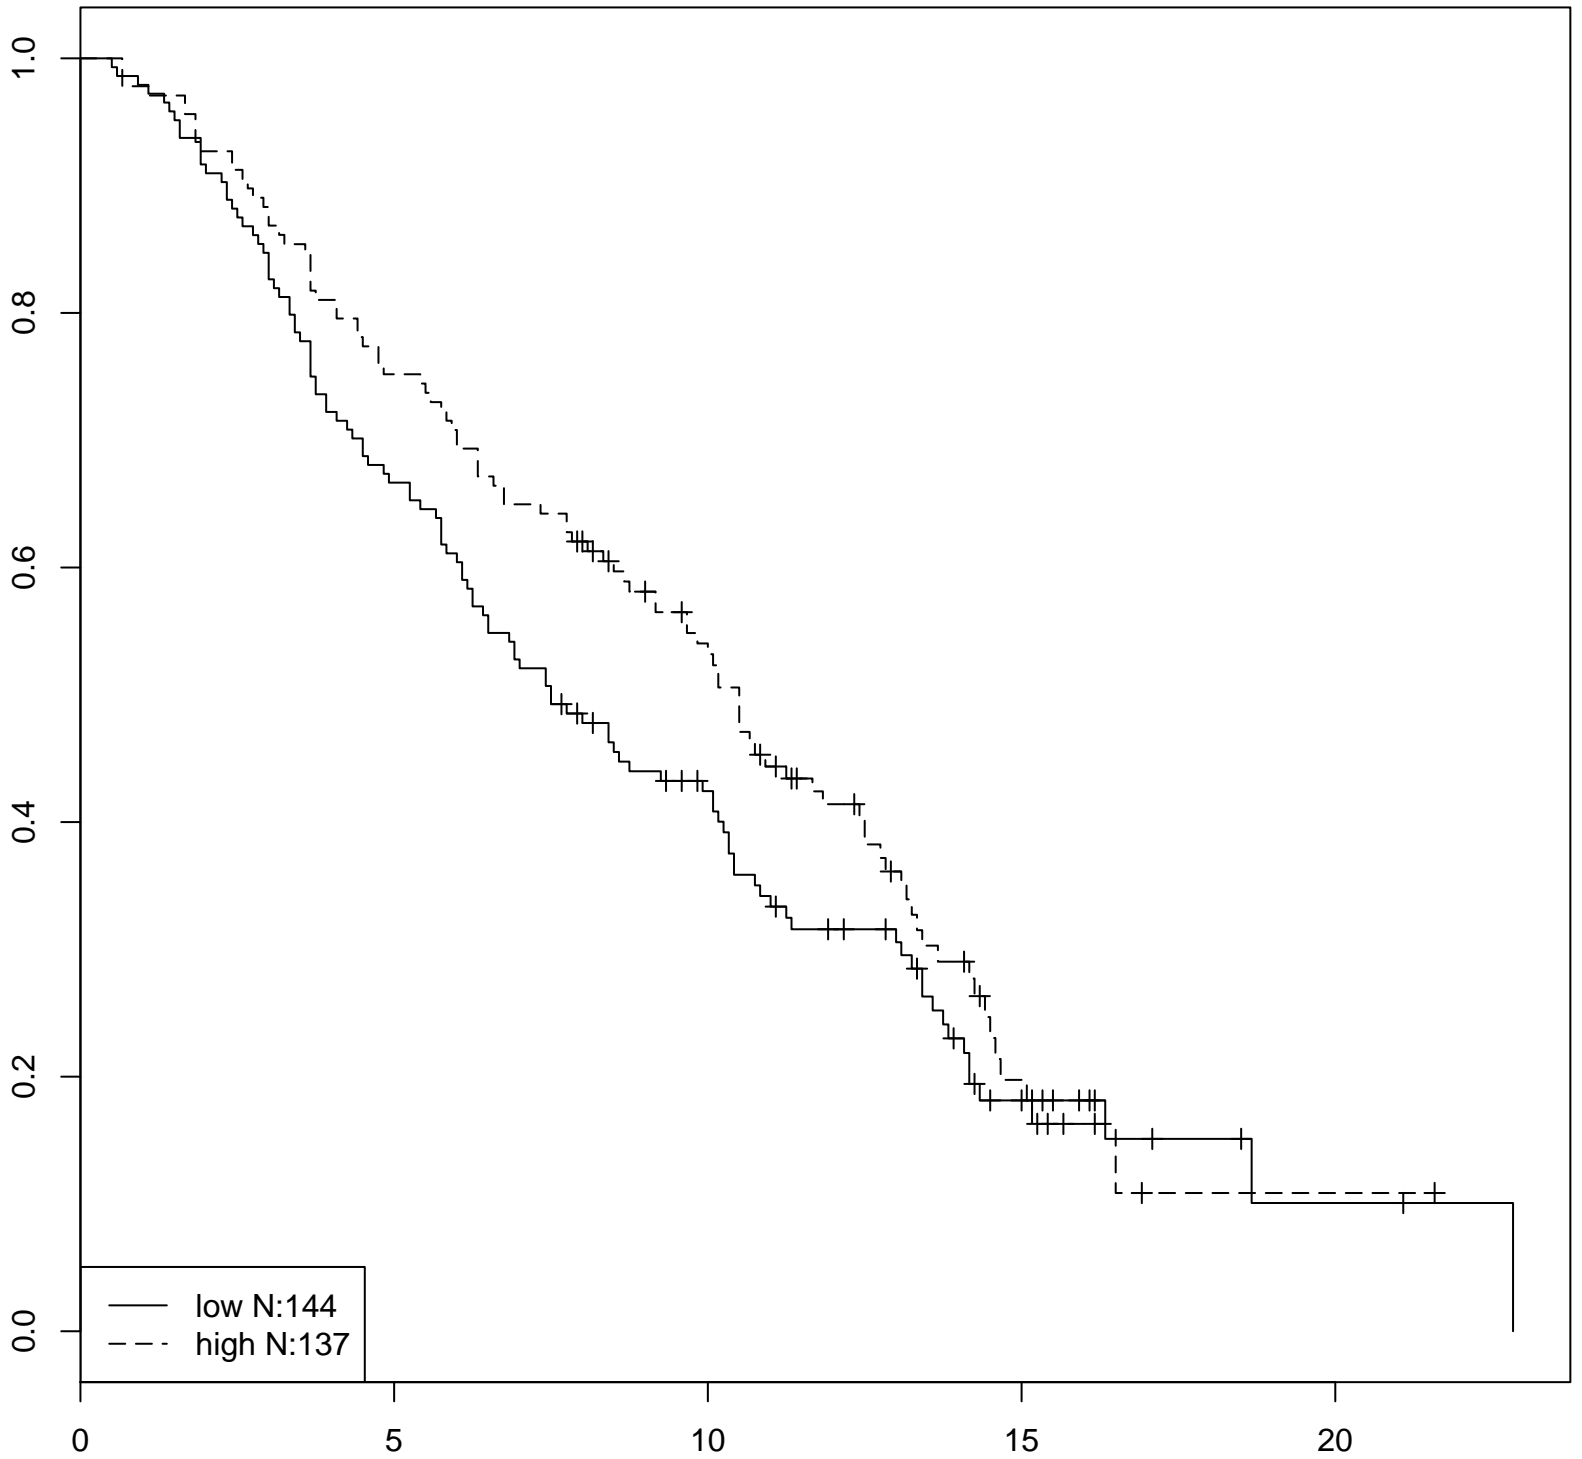

years

log-rank test p-value = 0.139



# Survival by TRPV6 expression

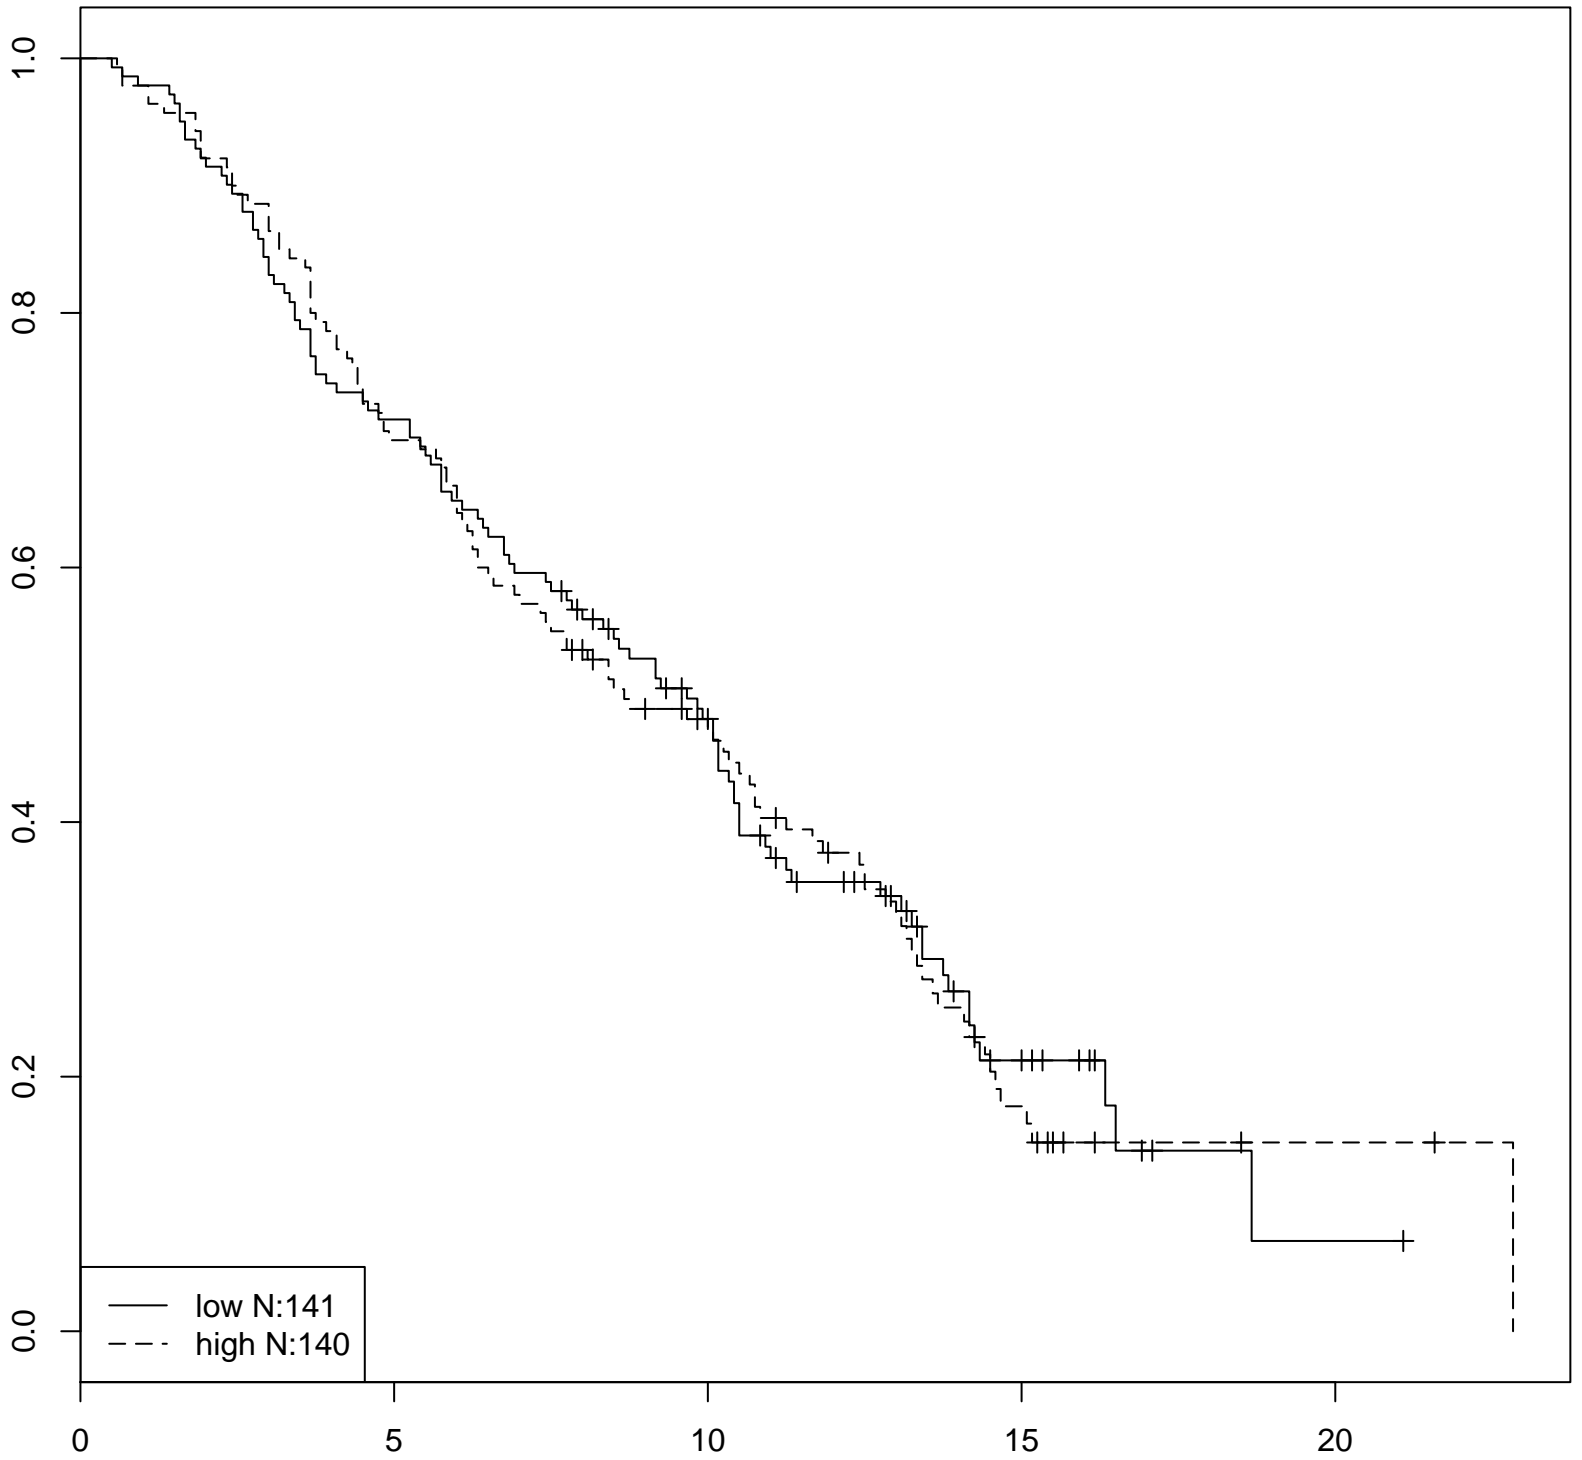

years

log-rank test p-value = 0.895

# Survival by TWF1 expression

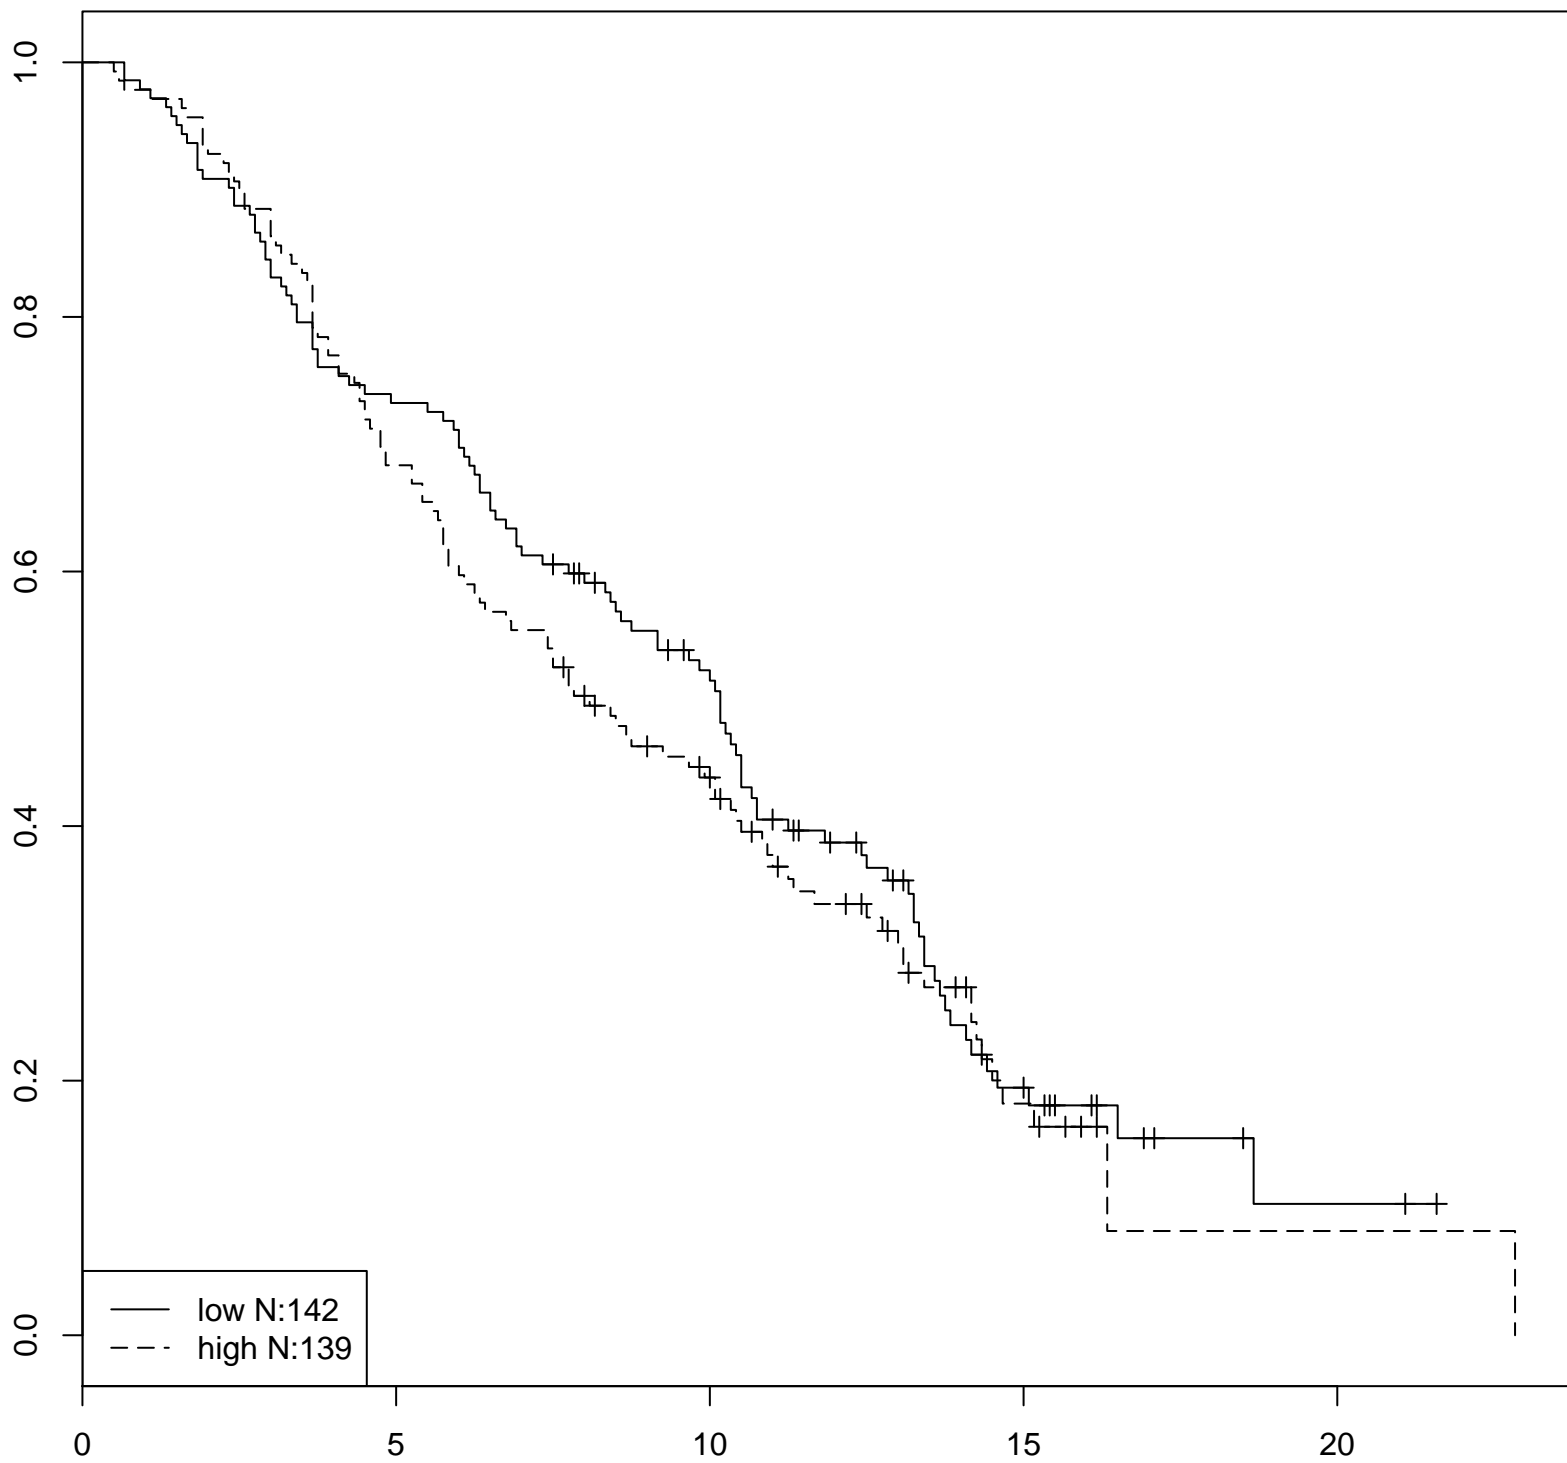

# Survival by UCHL1 expression

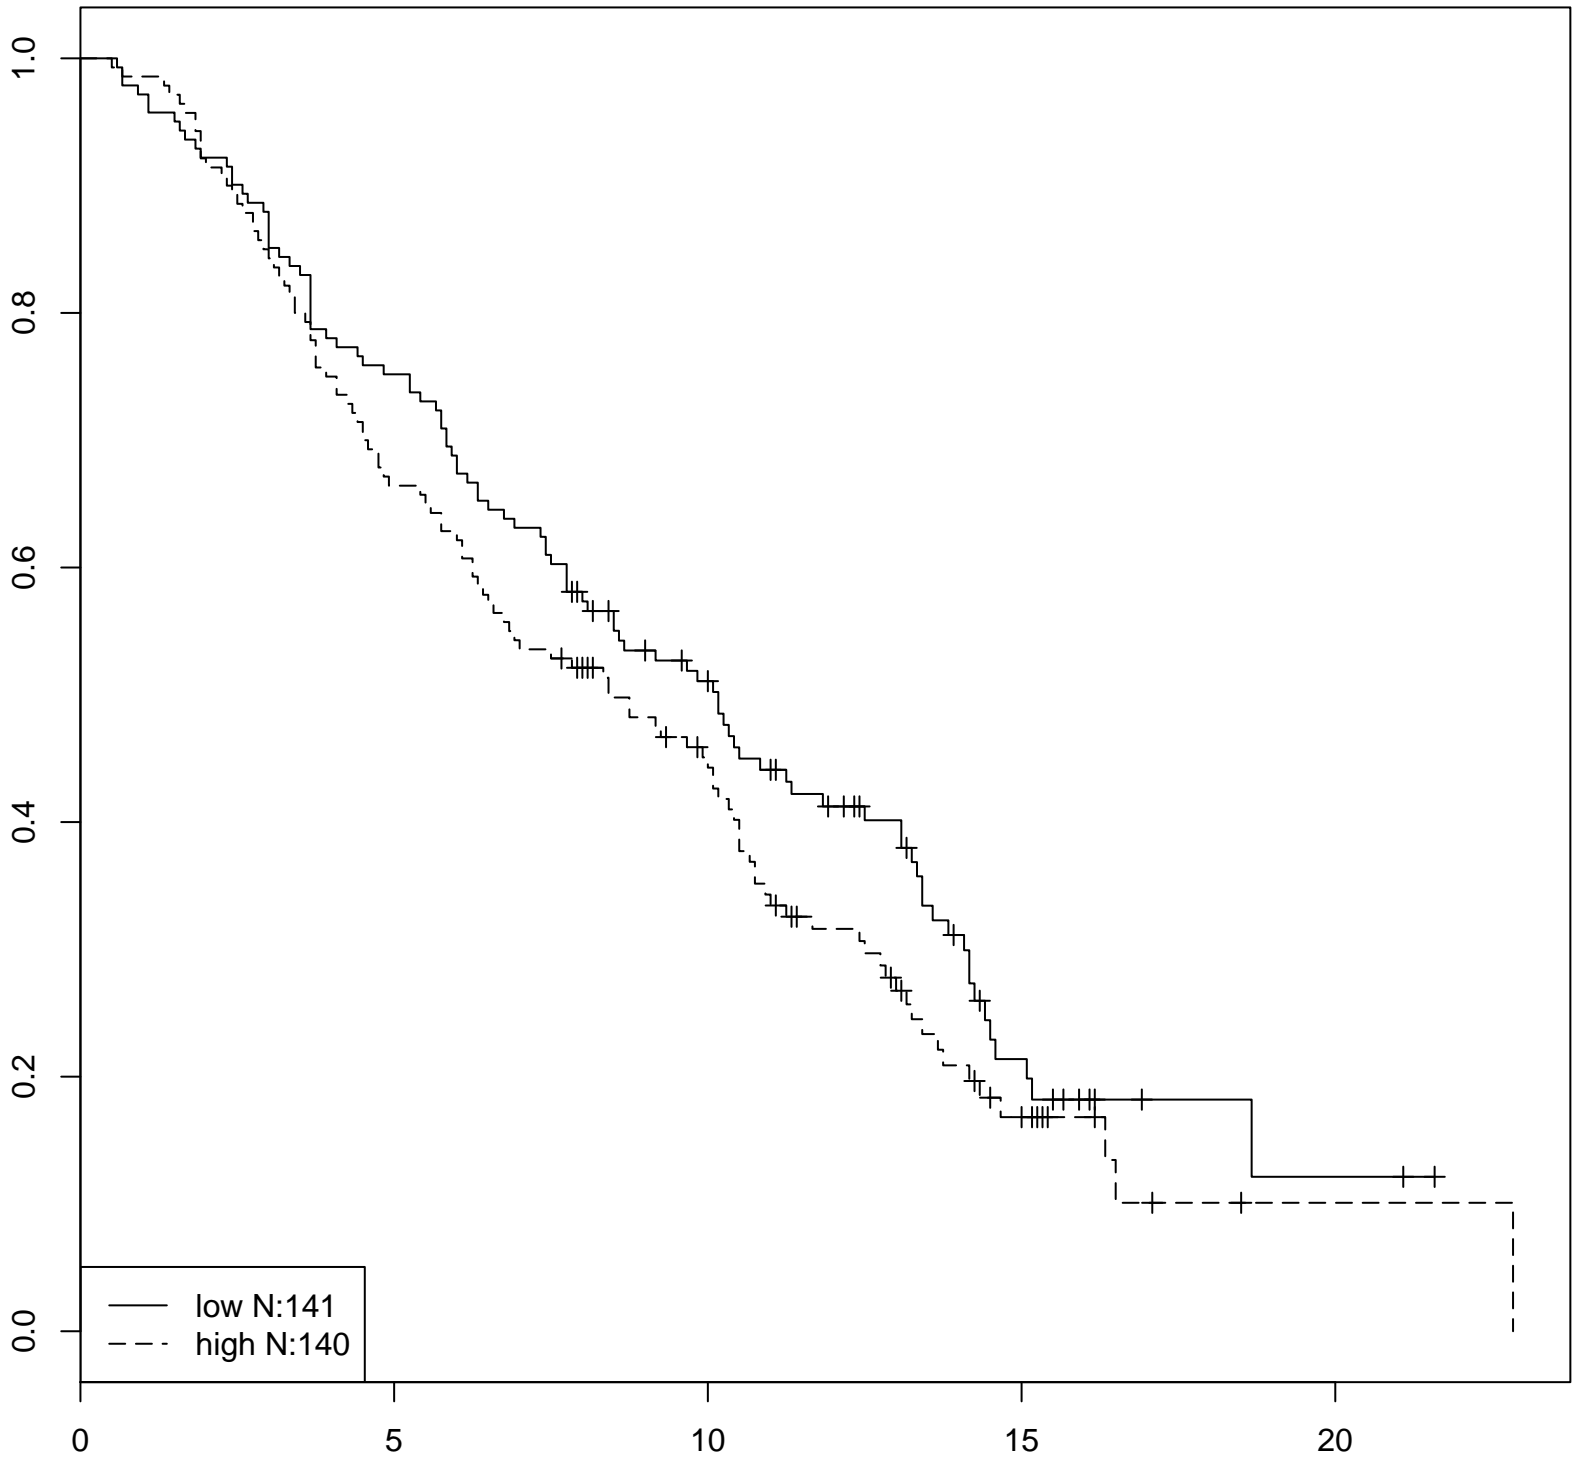

years

log-rank test p-value = 0.142

# Survival by VEGFA expression

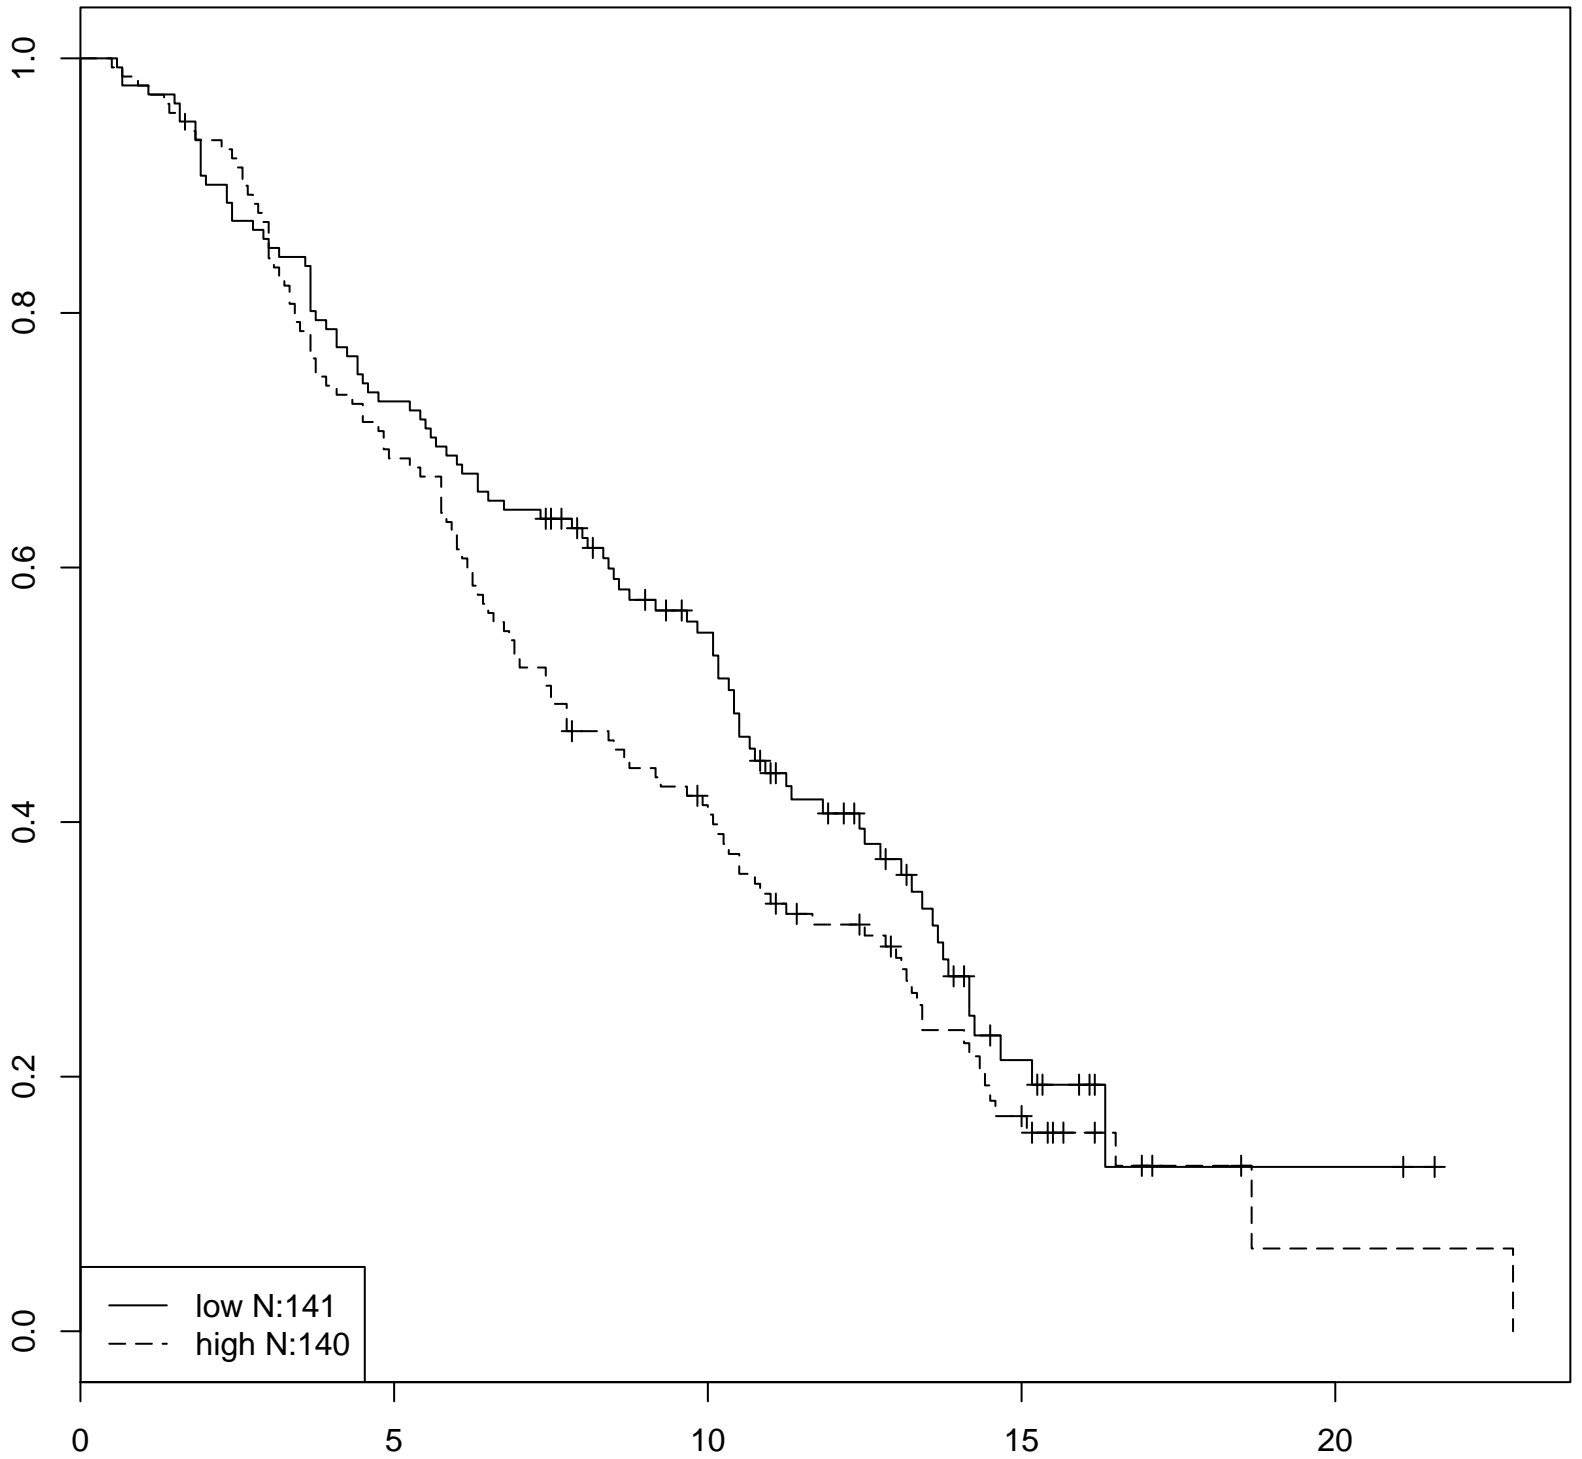

# Survival by WNT5A expression

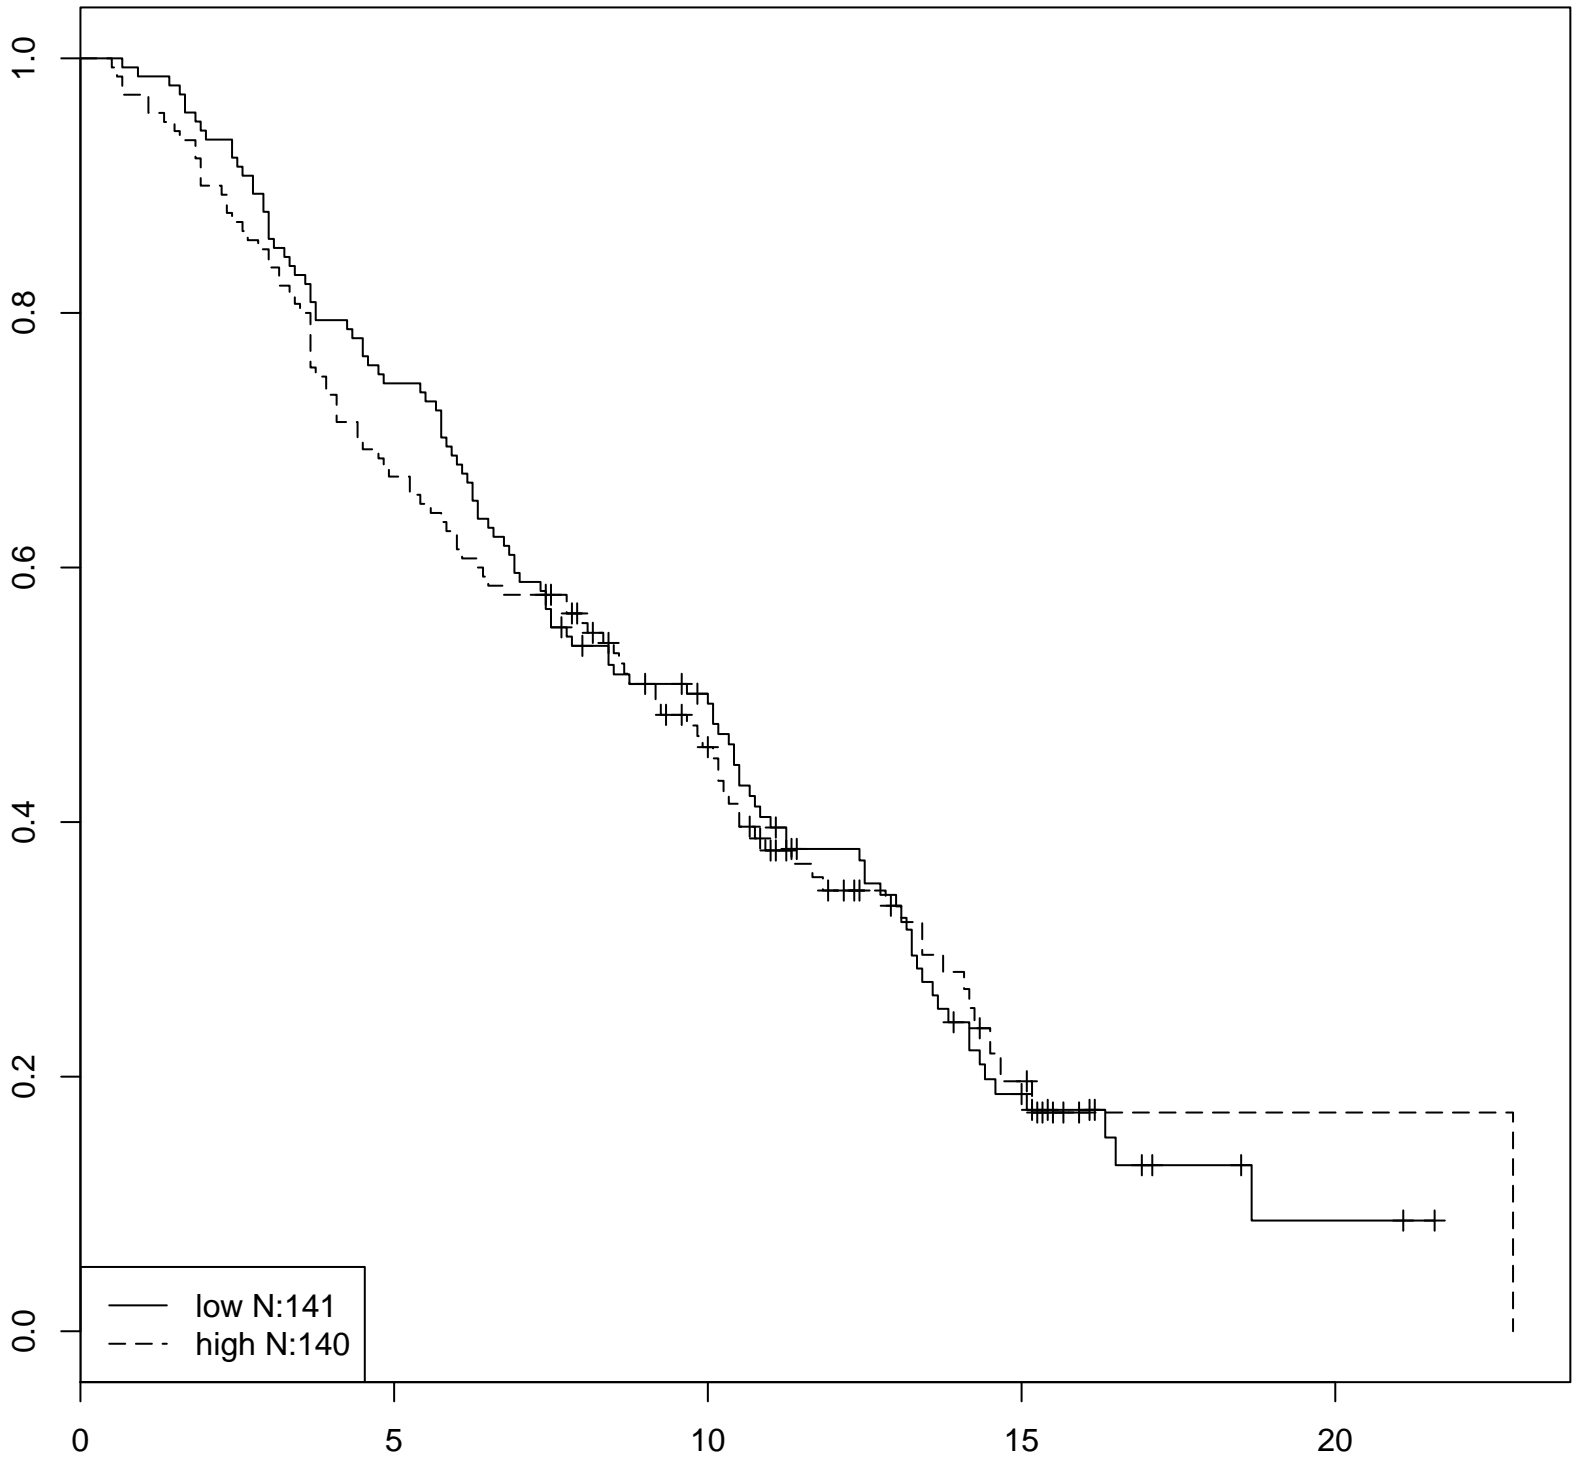

# Survival by WT1 expression

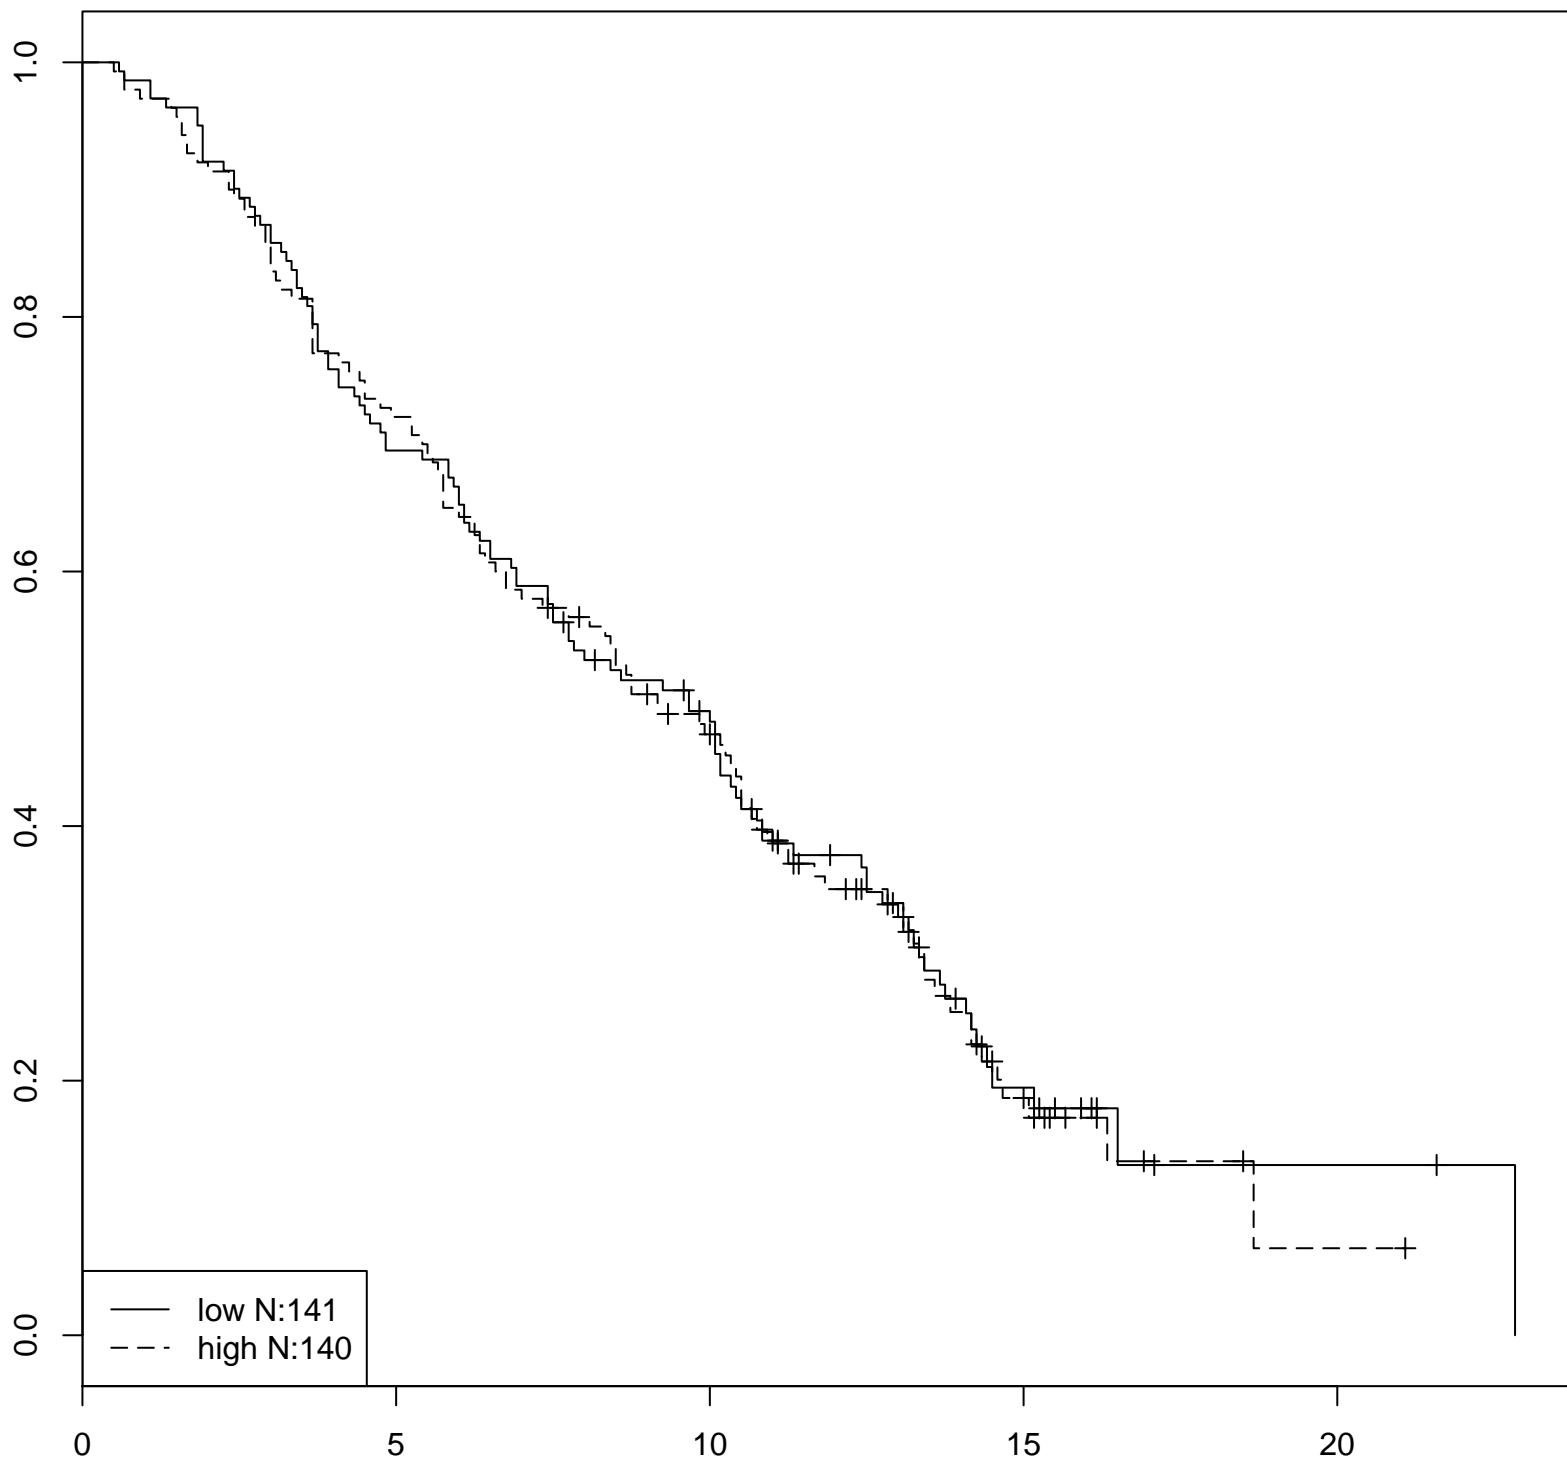

years

log-rank test p-value = 0.894

# Survival by ZEB1 expression

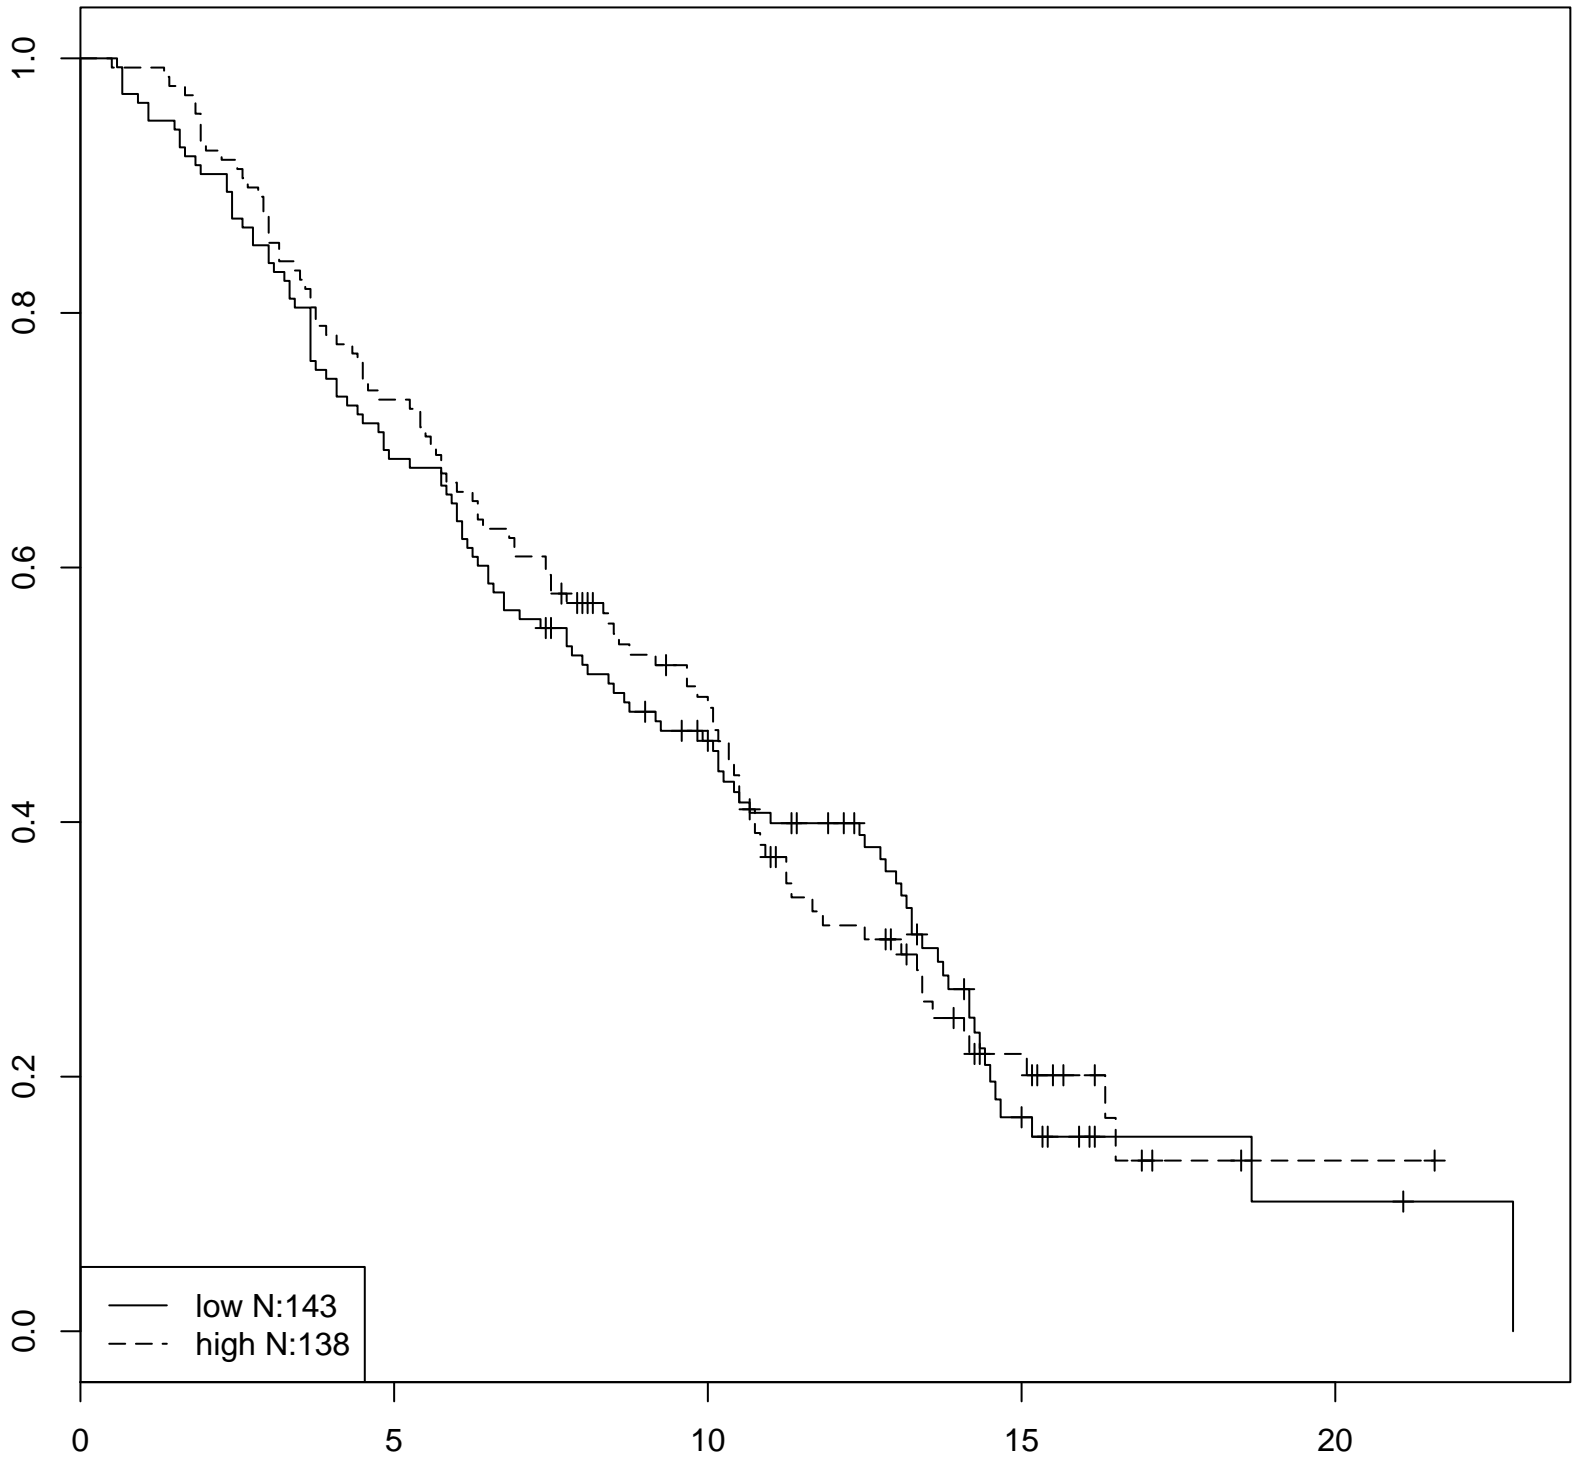

years

log-rank test p-value = 0.812

# Survival by ZNF132 expression

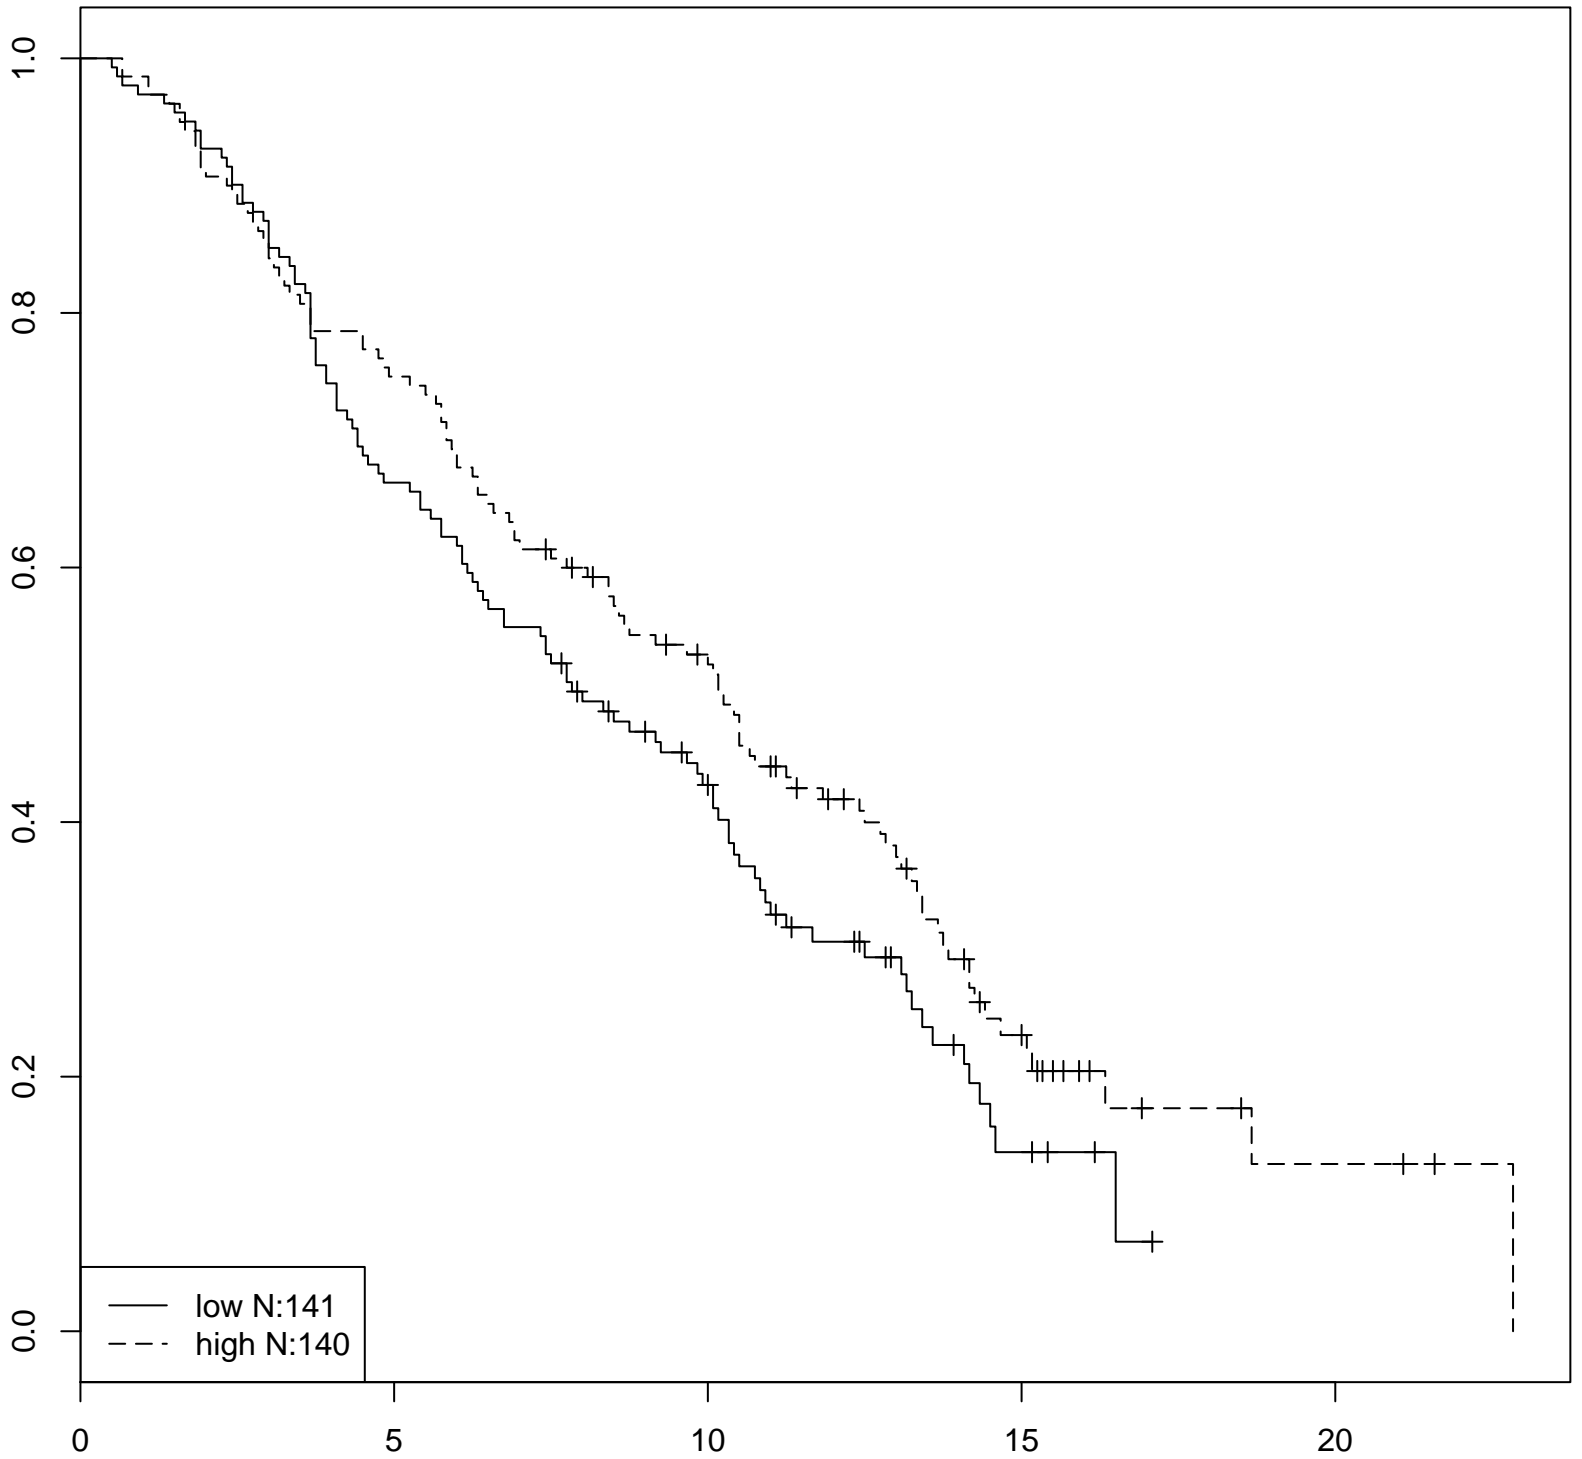

years

log-rank test p-value = 0.072
